# Supplementary material for: Hemmule: A Novel Structure with the Properties of the Stem Cell Niche
Source: Preprints.org preprint supplement (doi:10.20944/preprints201906.0206.v1), 2019-06-21
Supplement: Supplementary file 1 [file S1 Legends to Supplementary Tables.docx]

**S1 Legends to Supplementary Tables**

Each Supplementary Table consists of 29 columns. A short description for columns is provided below:

- Column A: Name of the feature examined; in this case the Gene Name
- Columns B-E and Z-AC: Linear Total RPKM
  - RPKM or Reads assigned Per Kilobase per Million mapped reads is a normalization method for RNA-Seq experiments.
  - The RPKM method uses the signal values for each experiment and divides the total bases of target sequence by one thousand; the resulting number is then divided by the total number of mapped reads divided by one million.
  - RPKM normalization is necessary due to certain biases involved in RNA-seq such as sequencing depth and gene length.
- Columns F-I: Fold Change
  - Difference in gene expression level between the comparative groups.
- Column J: QSeqID
  - A software specific generated ID linked to the gene of that row.
- Column K: qseq_name
  - The feature (gene) linked to the QseqID. This also matches the data in column A.
- Column L: Feature Type
  - The type of feature annotated
- Column N: Source File
  - Local pathway to template sequence
  - Includes the Accession number and Chromosome of each feature e.g. NC_005100_chr1
- Column O: Source Seq Length
  - The length, in base pairs, of the template sequence.
- Column P: Source Sequence
  - The template sequence on which the gene occurs (Accession number)
- Column Q: Strand
  - Strand on which the gene is located
- Colum R: Target Length
  - The target length of the fragment, equal to the end position minus the start position.
- Column S: Target Range
  - The start and end position of feature.
- Column T: db_xref
  - Database Cross-Reference e.g. A Cross Reference of the NCBI Gene ID with the RGD ID
- Column V: gene
  - Gene Name
- Column W: gene_synonym
  - Alternative gene names the target may have been known by at earlier times.

**Abbreviations:**

H - Hemmule

BM – Bone marrow

LN – Lymph node

BV – Blood vessel
