# Supplementary material for: Hemmule: A Novel Structure with the Properties of the Stem Cell Niche
Source: Preprints.org preprint supplement (doi:10.20944/preprints201906.0206.v1), 2019-06-21
Supplement: Supplementary file 2 [file S1 Table 2 HvsBV95%confidenceAND4-foldchange.xlsx]

## Sheet: HvsBloodVessel95percentconfide
Name	BV - linear total RPKM	BM - linear total RPKM	LN - linear total RPKM	H-linear total RPKM	Fold change BV vs BM	Fold change H vs BM	Fold change H vs LN	Fold change H vs BV	QSeq ID	/qseq_name	Feature Type	Notes	Source File	Source Seq Length	Source Sequence	Strand	Target Length	Target Range	/db_xref	/exception	/gene	/gene_synonym
LOC103690936	0.001	2.153	0.028	0.406	2278.4	5.30357	0.0699792	0.00232777	Z-000278	LOC103690936	gene		D:\assemblies\Rattus_norvegicus-Rnor_6.0-dbSNP149\Rattus_norvegicus-Rnor_6.0-dbSNP149.genometemplate\sequences\NC_005100_chr1.gbk#0	282763074	NC_005100.4	+	41219	24852238..24893456	103690936, 9452253		LOC103690936
LOC108349099	0.001	0.654	0.025	0.072	692.154	9.08099	0.351651	0.0131199	Z-000471	LOC108349099	gene		D:\assemblies\Rattus_norvegicus-Rnor_6.0-dbSNP149\Rattus_norvegicus-Rnor_6.0-dbSNP149.genometemplate\sequences\NC_005100_chr1.gbk#0	282763074	NC_005100.4	+	16227	48767775..48784001	108349099		LOC108349099
Gng8	0.001	11.026	1.627	1.899	11665.7	5.80677	0.856943	0.000497765	Z-000977	Gng8	gene		D:\assemblies\Rattus_norvegicus-Rnor_6.0-dbSNP149\Rattus_norvegicus-Rnor_6.0-dbSNP149.genometemplate\sequences\NC_005100_chr1.gbk#0	282763074	NC_005100.4	+	3865	78818360..78822224	245986, 620808		Gng8
LOC102553424	0.001	0.005	0.003	0.268	5.68852	0.0200644	0.012706	0.00352717	Z-001010	LOC102553424	gene		D:\assemblies\Rattus_norvegicus-Rnor_6.0-dbSNP149\Rattus_norvegicus-Rnor_6.0-dbSNP149.genometemplate\sequences\NC_005100_chr1.gbk#0	282763074	NC_005100.4	-	24361	80028841..80004481	102553424, 7528935		LOC102553424
Igsf23	0.001	0.752	0.277	0.124	795.923	6.07107	2.23654	0.00762772	Z-001061	Igsf23	gene		D:\assemblies\Rattus_norvegicus-Rnor_6.0-dbSNP149\Rattus_norvegicus-Rnor_6.0-dbSNP149.genometemplate\sequences\NC_005100_chr1.gbk#0	282763074	NC_005100.4	-	18699	80869481..80850783	502306, 1564357		Igsf23
Dll3	0.001	0.071	0.001	0.182	75.2266	0.390709	0.00519375	0.00519375	Z-001228	Dll3	gene		D:\assemblies\Rattus_norvegicus-Rnor_6.0-dbSNP149\Rattus_norvegicus-Rnor_6.0-dbSNP149.genometemplate\sequences\NC_005100_chr1.gbk#0	282763074	NC_005100.4	+	7809	85485875..85493683	114125, 70953		Dll3
LOC108348211	0.497	0.001	1.427	0.001	0.0019034	1	1509.48	525.377	Z-001795	LOC108348211	gene		D:\assemblies\Rattus_norvegicus-Rnor_6.0-dbSNP149\Rattus_norvegicus-Rnor_6.0-dbSNP149.genometemplate\sequences\NC_005100_chr1.gbk#0	282763074	NC_005100.4	-	537	118893309..118892773	108348211		LOC108348211
LOC108349600	0.001	0.009	0.005	0.237	9.10937	0.0364023	0.0216568	0.00399614	Z-001994	LOC108349600	gene		D:\assemblies\Rattus_norvegicus-Rnor_6.0-dbSNP149\Rattus_norvegicus-Rnor_6.0-dbSNP149.genometemplate\sequences\NC_005100_chr1.gbk#0	282763074	NC_005100.4	-	1916	142836260..142834345	108349600		LOC108349600
RGD1561034	0.001	0.006	0.138	0.249	6.77504	0.025703	0.552558	0.00379378	Z-002434	RGD1561034	gene		D:\assemblies\Rattus_norvegicus-Rnor_6.0-dbSNP149\Rattus_norvegicus-Rnor_6.0-dbSNP149.genometemplate\sequences\NC_005100_chr1.gbk#0	282763074	NC_005100.4	+	3571	170212817..170216387	308908, 1561034		RGD1561034
LOC102549682	0.001	0.147	0.006	0.494	155.762	0.297816	0.0124659	0.00191199	Z-002713	LOC102549682	gene		D:\assemblies\Rattus_norvegicus-Rnor_6.0-dbSNP149\Rattus_norvegicus-Rnor_6.0-dbSNP149.genometemplate\sequences\NC_005100_chr1.gbk#0	282763074	NC_005100.4	-	2344	191829514..191827171	102549682, 7712961		LOC102549682
LOC103691238	0.001	0.001	0.006	0.42	1	0.00224842	0.0144001	0.00224842	Z-002882	LOC103691238	gene		D:\assemblies\Rattus_norvegicus-Rnor_6.0-dbSNP149\Rattus_norvegicus-Rnor_6.0-dbSNP149.genometemplate\sequences\NC_005100_chr1.gbk#0	282763074	NC_005100.4	-	10124	199655164..199645041	103691238, 9074604		LOC103691238
LOC102548505	0.001	0.124	0.009	0.035	131.578	3.55314	0.255501	0.027004	Z-003162	LOC102548505	gene		D:\assemblies\Rattus_norvegicus-Rnor_6.0-dbSNP149\Rattus_norvegicus-Rnor_6.0-dbSNP149.genometemplate\sequences\NC_005100_chr1.gbk#0	282763074	NC_005100.4	+	47773	215753880..215801652	102548505, 7669488		LOC102548505
Phlda2	0.001	0.001	0.686	0.324	1	0.00291896	2.11748	0.00291896	Z-003180	Phlda2	gene		D:\assemblies\Rattus_norvegicus-Rnor_6.0-dbSNP149\Rattus_norvegicus-Rnor_6.0-dbSNP149.genometemplate\sequences\NC_005100_chr1.gbk#0	282763074	NC_005100.4	-	3135	216704479..216701345	293637, 1304755		Phlda2
Gna14	0.001	0.055	0.251	0.421	57.9737	0.130011	0.595457	0.00224258	Z-003679	Gna14	gene		D:\assemblies\Rattus_norvegicus-Rnor_6.0-dbSNP149\Rattus_norvegicus-Rnor_6.0-dbSNP149.genometemplate\sequences\NC_005100_chr1.gbk#0	282763074	NC_005100.4	+	182212	235165775..235347986	309242, 1308122		Gna14	Tieg3
Edil3	0.296	0.001	0.312	0.001	0.0031902	1	330.484	313.46	Z-004274	Edil3	gene		D:\assemblies\Rattus_norvegicus-Rnor_6.0-dbSNP149\Rattus_norvegicus-Rnor_6.0-dbSNP149.genometemplate\sequences\NC_005101_chr2.gbk#0	266435125	NC_005101.4	+	512399	17616116..18128514	688400, 1588887		Edil3
Npr3	0.001	0.059	0.018	0.228	62.9543	0.260691	0.0770922	0.00414095	Z-004651	Npr3	gene		D:\assemblies\Rattus_norvegicus-Rnor_6.0-dbSNP149\Rattus_norvegicus-Rnor_6.0-dbSNP149.genometemplate\sequences\NC_005101_chr2.gbk#0	266435125	NC_005101.4	-	66346	61950291..61883946	25339, 3196		Npr3	ANP-CR, NPRC
Slc10a5	0.001	0.007	0.608	0.246	7.34463	0.0282207	2.47185	0.00384236	Z-004759	Slc10a5	gene		D:\assemblies\Rattus_norvegicus-Rnor_6.0-dbSNP149\Rattus_norvegicus-Rnor_6.0-dbSNP149.genometemplate\sequences\NC_005101_chr2.gbk#0	266435125	NC_005101.4	+	1305	93669962..93671266	310230, 1306036		Slc10a5
LOC102552069	0.001	0.012	1.695	0.627	12.5903	0.0189688	2.70222	0.00150662	Z-004948	LOC102552069	gene		D:\assemblies\Rattus_norvegicus-Rnor_6.0-dbSNP149\Rattus_norvegicus-Rnor_6.0-dbSNP149.genometemplate\sequences\NC_005101_chr2.gbk#0	266435125	NC_005101.4	+	8517	122520921..122529437	102552069, 7556623		LOC102552069
LOC102553085	0.001	0.012	1.695	0.627	12.5903	0.0189688	2.70222	0.00150662	Z-004951	LOC102553085	gene		D:\assemblies\Rattus_norvegicus-Rnor_6.0-dbSNP149\Rattus_norvegicus-Rnor_6.0-dbSNP149.genometemplate\sequences\NC_005101_chr2.gbk#0	266435125	NC_005101.4	+	8517	122641859..122650375	102553085, 7631924		LOC102553085
LOC102554967	0.001	0.006	0.003	0.072	6.44737	0.085146	0.0444877	0.0132063	Z-005180	LOC102554967	gene		D:\assemblies\Rattus_norvegicus-Rnor_6.0-dbSNP149\Rattus_norvegicus-Rnor_6.0-dbSNP149.genometemplate\sequences\NC_005101_chr2.gbk#0	266435125	NC_005101.4	-	39777	157729296..157689520	102554967, 7723395		LOC102554967
Gpr61	0.001	0.527	0.039	0.067	557.426	7.81811	0.579816	0.0140254	Z-005899	Gpr61	gene		D:\assemblies\Rattus_norvegicus-Rnor_6.0-dbSNP149\Rattus_norvegicus-Rnor_6.0-dbSNP149.genometemplate\sequences\NC_005101_chr2.gbk#0	266435125	NC_005101.4	-	6439	210943727..210937289	310780, 1310176		Gpr61
Extl2	0.001	0.056	0.005	0.295	59.4127	0.190611	0.0160132	0.00320826	Z-005949	Extl2	gene		D:\assemblies\Rattus_norvegicus-Rnor_6.0-dbSNP149\Rattus_norvegicus-Rnor_6.0-dbSNP149.genometemplate\sequences\NC_005101_chr2.gbk#0	266435125	NC_005101.4	+	21465	218951112..218972576	310803, 1307684		Extl2
Tram1l1	0.001	0.109	0.005	0.267	114.899	0.406604	0.0176763	0.00353881	Z-006030	Tram1l1	gene		D:\assemblies\Rattus_norvegicus-Rnor_6.0-dbSNP149\Rattus_norvegicus-Rnor_6.0-dbSNP149.genometemplate\sequences\NC_005101_chr2.gbk#0	266435125	NC_005101.4	+	2182	228544418..228546599	310846, 1306398		Tram1l1
LOC103691708	0.001	0.119	0.008	0.514	125.943	0.231442	0.0151373	0.00183766	Z-006088	LOC103691708	gene		D:\assemblies\Rattus_norvegicus-Rnor_6.0-dbSNP149\Rattus_norvegicus-Rnor_6.0-dbSNP149.genometemplate\sequences\NC_005101_chr2.gbk#0	266435125	NC_005101.4	+	1012	236260581..236261592	103691708, 9101519		LOC103691708
LOC102550300	0.001	0.013	0.764	0.86	14.0105	0.0153885	0.887573	0.00109835	Z-006262	LOC102550300	gene		D:\assemblies\Rattus_norvegicus-Rnor_6.0-dbSNP149\Rattus_norvegicus-Rnor_6.0-dbSNP149.genometemplate\sequences\NC_005101_chr2.gbk#0	266435125	NC_005101.4	-	444	254507879..254507436	102550300, 7543942		LOC102550300
Erich3	0.001	0.06	0.02	0.06	63.2315	1.00102	0.331706	0.015831	Z-006312	Erich3	gene		D:\assemblies\Rattus_norvegicus-Rnor_6.0-dbSNP149\Rattus_norvegicus-Rnor_6.0-dbSNP149.genometemplate\sequences\NC_005101_chr2.gbk#0	266435125	NC_005101.4	+	102004	260947970..261049973	295528, 1593279		Erich3
LOC102554660	0.292	0.009	1.157	0.001	0.0312547	9.6492	1223.88	308.728	Z-006770	LOC102554660	gene		D:\assemblies\Rattus_norvegicus-Rnor_6.0-dbSNP149\Rattus_norvegicus-Rnor_6.0-dbSNP149.genometemplate\sequences\NC_005102_chr3.gbk#0	177699992	NC_005102.4	+	728	18060465..18061192	102554660		LOC102554660
LOC102555397	0.292	0.009	1.157	0.001	0.0312547	9.6492	1223.88	308.728	Z-006776	LOC102555397	gene		D:\assemblies\Rattus_norvegicus-Rnor_6.0-dbSNP149\Rattus_norvegicus-Rnor_6.0-dbSNP149.genometemplate\sequences\NC_005102_chr3.gbk#0	177699992	NC_005102.4	+	728	18501895..18502622	102555397		LOC102555397
LOC103691848	0.001	0.006	0.003	0.063	6.61169	0.098721	0.0482818	0.0149313	Z-007533	LOC103691848	gene		D:\assemblies\Rattus_norvegicus-Rnor_6.0-dbSNP149\Rattus_norvegicus-Rnor_6.0-dbSNP149.genometemplate\sequences\NC_005102_chr3.gbk#0	177699992	NC_005102.4	+	6107	80964362..80970468	103691848, 9373253		LOC103691848
LOC108350465	0.001	0.428	0.015	0.142	452.496	3.00717	0.103706	0.00664573	Z-008029	LOC108350465	gene		D:\assemblies\Rattus_norvegicus-Rnor_6.0-dbSNP149\Rattus_norvegicus-Rnor_6.0-dbSNP149.genometemplate\sequences\NC_005102_chr3.gbk#0	177699992	NC_005102.4	-	7706	124085227..124077522	108350465		LOC108350465
LOC102551821	0.001	0.007	0.001	0.249	6.90296	0.0262283	0.00379958	0.00379958	Z-008370	LOC102551821	gene		D:\assemblies\Rattus_norvegicus-Rnor_6.0-dbSNP149\Rattus_norvegicus-Rnor_6.0-dbSNP149.genometemplate\sequences\NC_005102_chr3.gbk#0	177699992	NC_005102.4	-	10338	152886391..152876054	102551821, 7616921		LOC102551821
Wfdc15b	0.001	0.001	0.01	0.666	1	0.00141922	0.0153805	0.00141922	Z-008495	Wfdc15b	gene		D:\assemblies\Rattus_norvegicus-Rnor_6.0-dbSNP149\Rattus_norvegicus-Rnor_6.0-dbSNP149.genometemplate\sequences\NC_005102_chr3.gbk#0	177699992	NC_005102.4	-	10154	160617212..160607059	408230, 1303042		Wfdc15b	Pi3, Serpina1c, Skalp, Wfdc14
Pard6b	0.001	0.048	0.044	0.372	50.8291	0.129007	0.117941	0.00253806	Z-008599	Pard6b	gene		D:\assemblies\Rattus_norvegicus-Rnor_6.0-dbSNP149\Rattus_norvegicus-Rnor_6.0-dbSNP149.genometemplate\sequences\NC_005102_chr3.gbk#0	177699992	NC_005102.4	+	21285	164822111..164843395	362279, 1308205		Pard6b
Dpp6	0.001	0.004	0.027	0.12	4.02736	0.0316478	0.222225	0.00785819	Z-008874	Dpp6	gene		D:\assemblies\Rattus_norvegicus-Rnor_6.0-dbSNP149\Rattus_norvegicus-Rnor_6.0-dbSNP149.genometemplate\sequences\NC_005103_chr4.gbk#0	184226339	NC_005103.4	-	922655	4943675..4021021	29272, 68402		Dpp6	DPP VI
Peg10	0.001	0.031	0.001	0.186	32.8499	0.167231	0.00509076	0.00509076	Z-009073	Peg10	gene		D:\assemblies\Rattus_norvegicus-Rnor_6.0-dbSNP149\Rattus_norvegicus-Rnor_6.0-dbSNP149.genometemplate\sequences\NC_005103_chr4.gbk#0	184226339	NC_005103.4	+	8994	29795524..29804517	102553587, 1595574		Peg10
Stra8	0.001	0.071	0.026	0.183	74.993	0.38801	0.141618	0.00517395	Z-009294	Stra8	gene		D:\assemblies\Rattus_norvegicus-Rnor_6.0-dbSNP149\Rattus_norvegicus-Rnor_6.0-dbSNP149.genometemplate\sequences\NC_005103_chr4.gbk#0	184226339	NC_005103.4	+	27079	62447724..62474802	500079, 1562852		Stra8
LOC679818	0.001	0.001	0.002	0.034	1	0.0275872	0.0726481	0.0275872	Z-009347	LOC679818	gene		D:\assemblies\Rattus_norvegicus-Rnor_6.0-dbSNP149\Rattus_norvegicus-Rnor_6.0-dbSNP149.genometemplate\sequences\NC_005103_chr4.gbk#0	184226339	NC_005103.4	+	34448	68424544..68458991	679818, 1583670		LOC679818
LOC500159	0.497	0.001	1.427	0.001	0.0019034	1	1509.48	525.377	Z-009792	LOC500159	gene		D:\assemblies\Rattus_norvegicus-Rnor_6.0-dbSNP149\Rattus_norvegicus-Rnor_6.0-dbSNP149.genometemplate\sequences\NC_005103_chr4.gbk#0	184226339	NC_005103.4	+	537	101882953..101883489	500159		LOC500159
LOC102548450	0.167	0.041	1.269	0.001	0.244522	43.1724	1342.79	176.558	Z-010163	LOC102548450	gene		D:\assemblies\Rattus_norvegicus-Rnor_6.0-dbSNP149\Rattus_norvegicus-Rnor_6.0-dbSNP149.genometemplate\sequences\NC_005103_chr4.gbk#0	184226339	NC_005103.4	+	3098	145373527..145376624	102548450, 7499834		LOC102548450
Lpar5	0.258	0.008	0.006	0.001	0.0323503	8.82968	6.56654	272.94	Z-010364	Lpar5	gene		D:\assemblies\Rattus_norvegicus-Rnor_6.0-dbSNP149\Rattus_norvegicus-Rnor_6.0-dbSNP149.genometemplate\sequences\NC_005103_chr4.gbk#0	184226339	NC_005103.4	+	15455	157581000..157596454	500317, 1562580		Lpar5
LOC102551474	0.001	0.356	0.017	0.059	376.235	6.02177	0.29448	0.0160054	Z-011275	LOC102551474	gene		D:\assemblies\Rattus_norvegicus-Rnor_6.0-dbSNP149\Rattus_norvegicus-Rnor_6.0-dbSNP149.genometemplate\sequences\NC_005104_chr5.gbk#0	173707219	NC_005104.4	-	28780	70326106..70297327	102551474, 7555191		LOC102551474
Ifna5	0.001	0.001	0.001	0.223	1	0.00422898	0.00422898	0.00422898	Z-011485	Ifna5	gene		D:\assemblies\Rattus_norvegicus-Rnor_6.0-dbSNP149\Rattus_norvegicus-Rnor_6.0-dbSNP149.genometemplate\sequences\NC_005104_chr5.gbk#0	173707219	NC_005104.4	+	1087	106951822..106952908	690894, 1306135		Ifna5
Fam159a	0.001	0.196	0.006	0.69	207.543	0.284351	0.00849954	0.00137008	Z-011666	Fam159a	gene		D:\assemblies\Rattus_norvegicus-Rnor_6.0-dbSNP149\Rattus_norvegicus-Rnor_6.0-dbSNP149.genometemplate\sequences\NC_005104_chr5.gbk#0	173707219	NC_005104.4	-	15811	127983690..127967880	689322, 1593542		Fam159a
Best4	0.001	0.088	0.017	0.154	92.6101	0.568087	0.111289	0.00613418	Z-011777	Best4	gene		D:\assemblies\Rattus_norvegicus-Rnor_6.0-dbSNP149\Rattus_norvegicus-Rnor_6.0-dbSNP149.genometemplate\sequences\NC_005104_chr5.gbk#0	173707219	NC_005104.4	+	3765	136013978..136017742	689103, 1596200		Best4
LOC108351280	0.001	0.04	0.001	0.17	42.6231	0.236449	0.00554743	0.00554743	Z-013484	LOC108351280	gene		D:\assemblies\Rattus_norvegicus-Rnor_6.0-dbSNP149\Rattus_norvegicus-Rnor_6.0-dbSNP149.genometemplate\sequences\NC_005105_chr6.gbk#0	147991367	NC_005105.4	+	4163	110889152..110893314	108351280		LOC108351280
LOC103695322	0.482	0.001	35.52	0.001	0.00196249	1	37581.9	509.556	Z-013855	LOC103695322	gene		D:\assemblies\Rattus_norvegicus-Rnor_6.0-dbSNP149\Rattus_norvegicus-Rnor_6.0-dbSNP149.genometemplate\sequences\NC_005105_chr6.gbk#0	147991367	NC_005105.4	-	23794	138248758..138224965	103695322		LOC103695322
LOC691919	0.001	1.964	0.001	0.442	2078.14	4.4422	0.00213759	0.00213759	Z-013960	LOC691919	gene		D:\assemblies\Rattus_norvegicus-Rnor_6.0-dbSNP149\Rattus_norvegicus-Rnor_6.0-dbSNP149.genometemplate\sequences\NC_005105_chr6.gbk#0	147991367	NC_005105.4	-	518	142479986..142479469	691919, 1593361		LOC691919
LOC108351605	0.015	0.018	0.016	0.001	1.20122	18.7839	17.117	15.6374	Z-015096	LOC108351605	gene		D:\assemblies\Rattus_norvegicus-Rnor_6.0-dbSNP149\Rattus_norvegicus-Rnor_6.0-dbSNP149.genometemplate\sequences\NC_005106_chr7.gbk#0	145729302	NC_005106.4	-	31671	99570178..99538508	108351605		LOC108351605
Adamts20	0.001	0.125	0.075	0.044	132.526	2.847	1.69787	0.0214825	Z-015609	Adamts20	gene		D:\assemblies\Rattus_norvegicus-Rnor_6.0-dbSNP149\Rattus_norvegicus-Rnor_6.0-dbSNP149.genometemplate\sequences\NC_005106_chr7.gbk#0	145729302	NC_005106.4	-	165921	135630941..135465021	315263, 1307725		Adamts20
Prph	0.001	0.006	0.357	0.176	6.00334	0.032297	2.03357	0.00537983	Z-015716	Prph	gene		D:\assemblies\Rattus_norvegicus-Rnor_6.0-dbSNP149\Rattus_norvegicus-Rnor_6.0-dbSNP149.genometemplate\sequences\NC_005106_chr7.gbk#0	145729302	NC_005106.4	+	3792	140742406..140746197	24688, 3414		Prph	Perf, Prph1
LOC102549491	0.001	0.007	0.18	0.075	7.7814	0.0981965	2.40924	0.0126194	Z-015745	LOC102549491	gene		D:\assemblies\Rattus_norvegicus-Rnor_6.0-dbSNP149\Rattus_norvegicus-Rnor_6.0-dbSNP149.genometemplate\sequences\NC_005106_chr7.gbk#0	145729302	NC_005106.4	-	22104	141591682..141569579	102549491, 7623601		LOC102549491
LOC102554551	0.001	0.424	0.004	0.07	448.997	6.09627	0.0642451	0.0135775	Z-016961	LOC102554551	gene		D:\assemblies\Rattus_norvegicus-Rnor_6.0-dbSNP149\Rattus_norvegicus-Rnor_6.0-dbSNP149.genometemplate\sequences\NC_005107_chr8.gbk#0	133307652	NC_005107.4	+	165421	79871251..80036671	102554551, 7552397		LOC102554551
LOC102547387	0.001	0.007	1.701	0.391	7.29046	0.017618	4.34851	0.00241658	Z-017186	LOC102547387	gene		D:\assemblies\Rattus_norvegicus-Rnor_6.0-dbSNP149\Rattus_norvegicus-Rnor_6.0-dbSNP149.genometemplate\sequences\NC_005107_chr8.gbk#0	133307652	NC_005107.4	-	7551	107874525..107866975	102547387, 7555737		LOC102547387
Mst1	0.175	0.053	0.303	0.001	0.304469	56.2206	320.851	184.651	Z-017318	Mst1	gene		D:\assemblies\Rattus_norvegicus-Rnor_6.0-dbSNP149\Rattus_norvegicus-Rnor_6.0-dbSNP149.genometemplate\sequences\NC_005107_chr8.gbk#0	133307652	NC_005107.4	+	4571	116857716..116862286	24566, 3114		Mst1	E2F2
Lrfn2	0.001	0.315	0.022	0.089	333.775	3.55039	0.243261	0.0106371	Z-017776	Lrfn2	gene		D:\assemblies\Rattus_norvegicus-Rnor_6.0-dbSNP149\Rattus_norvegicus-Rnor_6.0-dbSNP149.genometemplate\sequences\NC_005108_chr9.gbk#0	122095297	NC_005108.4	-	169605	14015360..13845756	316205, 1311831		Lrfn2	Salm1
RGD1307182	0.633	0.124	0.036	0.001	0.195564	131.025	38.0459	669.988	Z-017789	RGD1307182	gene		D:\assemblies\Rattus_norvegicus-Rnor_6.0-dbSNP149\Rattus_norvegicus-Rnor_6.0-dbSNP149.genometemplate\sequences\NC_005108_chr9.gbk#0	122095297	NC_005108.4	-	8948	14654376..14645429	316207, 1307182		RGD1307182
LOC102549795	0.001	0.079	1.339	0.094	83.8002	0.844332	14.2725	0.0100755	Z-017963	LOC102549795	gene		D:\assemblies\Rattus_norvegicus-Rnor_6.0-dbSNP149\Rattus_norvegicus-Rnor_6.0-dbSNP149.genometemplate\sequences\NC_005108_chr9.gbk#0	122095297	NC_005108.4	-	13612	27068065..27054454	102549795, 7567345		LOC102549795
LOC100912348	0.001	0.001	0.001	0.017	1	0.0542618	0.0542618	0.0542618	Z-018013	LOC100912348	gene		D:\assemblies\Rattus_norvegicus-Rnor_6.0-dbSNP149\Rattus_norvegicus-Rnor_6.0-dbSNP149.genometemplate\sequences\NC_005108_chr9.gbk#0	122095297	NC_005108.4	+	11992	37749031..37761022	100912348, 6487168		LOC100912348
Lipt1	0.001	1.114	2.033	0.311	1178.31	3.58028	6.53569	0.00303849	Z-018069	Lipt1	gene		D:\assemblies\Rattus_norvegicus-Rnor_6.0-dbSNP149\Rattus_norvegicus-Rnor_6.0-dbSNP149.genometemplate\sequences\NC_005108_chr9.gbk#0	122095297	NC_005108.4	+	5360	44466627..44471986	316342, 1310276		Lipt1
Cd28	0.399	0.006	0.367	0.001	0.014807	6.24474	388.575	421.742	Z-018264	Cd28	gene		D:\assemblies\Rattus_norvegicus-Rnor_6.0-dbSNP149\Rattus_norvegicus-Rnor_6.0-dbSNP149.genometemplate\sequences\NC_005108_chr9.gbk#0	122095297	NC_005108.4	+	27451	67546408..67573858	25660, 2299		Cd28	CD28RNA
Dusp28	0.001	0.093	1.171	0.863	98.2816	0.107689	1.35716	0.00109572	Z-018627	Dusp28	gene		D:\assemblies\Rattus_norvegicus-Rnor_6.0-dbSNP149\Rattus_norvegicus-Rnor_6.0-dbSNP149.genometemplate\sequences\NC_005108_chr9.gbk#0	122095297	NC_005108.4	+	6067	100072421..100078487	684024, 1595220		Dusp28
LOC100910483	0.001	0.007	0.237	0.406	7.35865	0.0171482	0.583209	0.00233035	Z-018724	LOC100910483	gene		D:\assemblies\Rattus_norvegicus-Rnor_6.0-dbSNP149\Rattus_norvegicus-Rnor_6.0-dbSNP149.genometemplate\sequences\NC_005108_chr9.gbk#0	122095297	NC_005108.4	-	59034	113873245..113814212	100910483, 6498319		LOC100910483
Dlgap1	0.001	0.009	0.004	0.121	9.16701	0.0713518	0.0317821	0.00778354	Z-018772	Dlgap1	gene		D:\assemblies\Rattus_norvegicus-Rnor_6.0-dbSNP149\Rattus_norvegicus-Rnor_6.0-dbSNP149.genometemplate\sequences\NC_005108_chr9.gbk#0	122095297	NC_005108.4	+	882762	118277046..119159807	65040, 620223		Dlgap1	DAP-1, Gkap, GKAP/SAPAP1, rGKAP, SAPAP1
LOC103693277	0.148	0.057	0.005	0.001	0.380841	59.7952	5.71286	157.008	Z-018943	LOC103693277	gene		D:\assemblies\Rattus_norvegicus-Rnor_6.0-dbSNP149\Rattus_norvegicus-Rnor_6.0-dbSNP149.genometemplate\sequences\NC_005109_chr10.gbk#0	112626471	NC_005109.4	+	11786	11570690..11582475	103693277, 9330198		LOC103693277
Casp16	0.001	0.001	0.006	0.235	1	0.00401624	0.0242313	0.00401624	Z-018991	Casp16	gene		D:\assemblies\Rattus_norvegicus-Rnor_6.0-dbSNP149\Rattus_norvegicus-Rnor_6.0-dbSNP149.genometemplate\sequences\NC_005109_chr10.gbk#0	112626471	NC_005109.4	-	6560	12885492..12878933	680728, 1588238		Casp16
Cldn6	0.001	0.007	0.032	0.243	7.31671	0.0284366	0.131188	0.00388653	Z-019001	Cldn6	gene		D:\assemblies\Rattus_norvegicus-Rnor_6.0-dbSNP149\Rattus_norvegicus-Rnor_6.0-dbSNP149.genometemplate\sequences\NC_005109_chr10.gbk#0	112626471	NC_005109.4	+	3605	12999256..13002860	287098, 1308837		Cldn6
Cldn9	0.001	0.099	0.044	0.309	104.871	0.320558	0.140889	0.0030567	Z-019002	Cldn9	gene		D:\assemblies\Rattus_norvegicus-Rnor_6.0-dbSNP149\Rattus_norvegicus-Rnor_6.0-dbSNP149.genometemplate\sequences\NC_005109_chr10.gbk#0	112626471	NC_005109.4	-	1432	13004441..13003010	287099, 1308999		Cldn9
Leap2	0.001	0.099	0.117	1.225	104.794	0.0808681	0.0951731	0.000771683	Z-019407	Leap2	gene		D:\assemblies\Rattus_norvegicus-Rnor_6.0-dbSNP149\Rattus_norvegicus-Rnor_6.0-dbSNP149.genometemplate\sequences\NC_005109_chr10.gbk#0	112626471	NC_005109.4	-	3391	38774515..38771125	497901, 1561235		Leap2	Ac1177
Arhgap44	0.001	0.068	0.243	0.412	72.1844	0.165755	0.590885	0.00229627	Z-019656	Arhgap44	gene		D:\assemblies\Rattus_norvegicus-Rnor_6.0-dbSNP149\Rattus_norvegicus-Rnor_6.0-dbSNP149.genometemplate\sequences\NC_005109_chr10.gbk#0	112626471	NC_005109.4	-	168000	51669546..51501547	303222, 1305664		Arhgap44
LOC102546598	0.001	0.127	0.287	0.438	133.867	0.288751	0.65397	0.002157	Z-020315	LOC102546598	gene		D:\assemblies\Rattus_norvegicus-Rnor_6.0-dbSNP149\Rattus_norvegicus-Rnor_6.0-dbSNP149.genometemplate\sequences\NC_005109_chr10.gbk#0	112626471	NC_005109.4	+	3725	83132612..83136336	102546598, 7660262		LOC102546598
LOC108352144	0.001	0.057	0.001	0.426	60.5736	0.134374	0.00221836	0.00221836	Z-020684	LOC108352144	gene		D:\assemblies\Rattus_norvegicus-Rnor_6.0-dbSNP149\Rattus_norvegicus-Rnor_6.0-dbSNP149.genometemplate\sequences\NC_005109_chr10.gbk#0	112626471	NC_005109.4	+	37441	93679044..93716484	108352144		LOC108352144
LOC108352149	0.001	0.025	0.005	0.278	26.5161	0.0902263	0.0166539	0.0034027	Z-020722	LOC108352149	gene		D:\assemblies\Rattus_norvegicus-Rnor_6.0-dbSNP149\Rattus_norvegicus-Rnor_6.0-dbSNP149.genometemplate\sequences\NC_005109_chr10.gbk#0	112626471	NC_005109.4	-	1972	95167975..95166004	108352149		LOC108352149
RGD1562726	0.001	0.01	0.001	0.833	10.6836	0.0121179	0.00113425	0.00113425	Z-021224	RGD1562726	gene		D:\assemblies\Rattus_norvegicus-Rnor_6.0-dbSNP149\Rattus_norvegicus-Rnor_6.0-dbSNP149.genometemplate\sequences\NC_005110_chr11.gbk#0	90463843	NC_005110.4	-	17930	31238495..31220566	498060, 1562726		RGD1562726
Tbx1	0.001	0.142	2.941	1.003	149.943	0.141228	2.93051	0.000941881	Z-021852	Tbx1	gene		D:\assemblies\Rattus_norvegicus-Rnor_6.0-dbSNP149\Rattus_norvegicus-Rnor_6.0-dbSNP149.genometemplate\sequences\NC_005110_chr11.gbk#0	90463843	NC_005110.4	+	9626	86552022..86561647	360737, 1307734		Tbx1
LOC103693608	0.001	0.138	0.081	0.273	145.584	0.503259	0.294868	0.00345683	Z-021898	LOC103693608	gene		D:\assemblies\Rattus_norvegicus-Rnor_6.0-dbSNP149\Rattus_norvegicus-Rnor_6.0-dbSNP149.genometemplate\sequences\NC_005110_chr11.gbk#0	90463843	NC_005110.4	-	10560	87775583..87765024	103693608, 9253656		LOC103693608
Fcer2	0.337	0.042	10.234	0.001	0.125155	44.5756	10827.9	356.164	Z-021983	Fcer2	gene		D:\assemblies\Rattus_norvegicus-Rnor_6.0-dbSNP149\Rattus_norvegicus-Rnor_6.0-dbSNP149.genometemplate\sequences\NC_005111_chr12.gbk#0	52716770	NC_005111.4	-	11553	2245324..2233772	171075, 619997		Fcer2	CD23, Fcer2a
LOC108352423	0.001	0.432	0.118	0.207	456.592	2.08107	0.571295	0.00455784	Z-022166	LOC108352423	gene		D:\assemblies\Rattus_norvegicus-Rnor_6.0-dbSNP149\Rattus_norvegicus-Rnor_6.0-dbSNP149.genometemplate\sequences\NC_005111_chr12.gbk#0	52716770	NC_005111.4	+	2354	13308309..13310662	108352423		LOC108352423
Cldn3	0.754	0.043	0.001	0.001	0.0570395	45.5285	1	798.193	Z-022327	Cldn3	gene		D:\assemblies\Rattus_norvegicus-Rnor_6.0-dbSNP149\Rattus_norvegicus-Rnor_6.0-dbSNP149.genometemplate\sequences\NC_005111_chr12.gbk#0	52716770	NC_005111.4	-	1473	21832813..21831341	65130, 68425		Cldn3
LOC108352432	0.001	0.415	0.005	0.295	439.6	1.40897	0.0184018	0.00320512	Z-022344	LOC108352432	gene		D:\assemblies\Rattus_norvegicus-Rnor_6.0-dbSNP149\Rattus_norvegicus-Rnor_6.0-dbSNP149.genometemplate\sequences\NC_005111_chr12.gbk#0	52716770	NC_005111.4	-	19438	22165080..22145643	108352432		LOC108352432
LOC102553558	0.001	0.049	0.15	0.253	51.7756	0.193307	0.594171	0.00373355	Z-022431	LOC102553558	gene		D:\assemblies\Rattus_norvegicus-Rnor_6.0-dbSNP149\Rattus_norvegicus-Rnor_6.0-dbSNP149.genometemplate\sequences\NC_005111_chr12.gbk#0	52716770	NC_005111.4	-	1972	25150352..25148381	102553558, 7689818		LOC102553558
Syna	0.001	0.351	0.004	0.137	371.657	2.56027	0.0278801	0.00688879	Z-022432	Syna	gene		D:\assemblies\Rattus_norvegicus-Rnor_6.0-dbSNP149\Rattus_norvegicus-Rnor_6.0-dbSNP149.genometemplate\sequences\NC_005111_chr12.gbk#0	52716770	NC_005111.4	+	7053	25161130..25168182	288602, 1563240		Syna	Gm52
LOC102550271	0.001	0.008	0.316	0.223	8.07359	0.0342065	1.41478	0.00423684	Z-023188	LOC102550271	gene		D:\assemblies\Rattus_norvegicus-Rnor_6.0-dbSNP149\Rattus_norvegicus-Rnor_6.0-dbSNP149.genometemplate\sequences\NC_005112_chr13.gbk#0	114033958	NC_005112.4	-	2879	68416820..68413942	102550271, 7592376		LOC102550271
Sft2d2	0.001	0.001	0.319	0.427	1	0.0022154	0.748608	0.0022154	Z-023355	Sft2d2	gene		D:\assemblies\Rattus_norvegicus-Rnor_6.0-dbSNP149\Rattus_norvegicus-Rnor_6.0-dbSNP149.genometemplate\sequences\NC_005112_chr13.gbk#0	114033958	NC_005112.4	-	19265	83457899..83438635	360868, 1310623		Sft2d2	RGD1310623
LOC108348225	0.001	0.058	0.227	0.437	61.5385	0.132959	0.519056	0.00216058	Z-023737	LOC108348225	gene		D:\assemblies\Rattus_norvegicus-Rnor_6.0-dbSNP149\Rattus_norvegicus-Rnor_6.0-dbSNP149.genometemplate\sequences\NC_005112_chr13.gbk#0	114033958	NC_005112.4	-	45942	109624235..109578294	108348225		LOC108348225
LOC108352829	17.602	2.203	0.001	0.001	0.125172	2331.2	1	18624	Z-024315	LOC108352829	gene		D:\assemblies\Rattus_norvegicus-Rnor_6.0-dbSNP149\Rattus_norvegicus-Rnor_6.0-dbSNP149.genometemplate\sequences\NC_005113_chr14.gbk#0	115493446	NC_005113.4	-	5477	46686390..46680914	108352829		LOC108352829
Dok7	0.001	0.018	0.003	0.117	19.3458	0.155939	0.0274411	0.00806059	Z-024480	Dok7	gene		D:\assemblies\Rattus_norvegicus-Rnor_6.0-dbSNP149\Rattus_norvegicus-Rnor_6.0-dbSNP149.genometemplate\sequences\NC_005113_chr14.gbk#0	115493446	NC_005113.4	-	38046	80963454..80925409	305448, 1566416		Dok7	RGD1566416
Hormad2	0.001	0.013	0.043	0.691	13.5146	0.0184782	0.0624563	0.00136728	Z-024565	Hormad2	gene		D:\assemblies\Rattus_norvegicus-Rnor_6.0-dbSNP149\Rattus_norvegicus-Rnor_6.0-dbSNP149.genometemplate\sequences\NC_005113_chr14.gbk#0	115493446	NC_005113.4	-	85382	84662237..84576856	498400, 1565447		Hormad2
LOC108352872	0.001	0.005	0.043	0.253	5.2317	0.0195312	0.171387	0.00373324	Z-024833	LOC108352872	gene		D:\assemblies\Rattus_norvegicus-Rnor_6.0-dbSNP149\Rattus_norvegicus-Rnor_6.0-dbSNP149.genometemplate\sequences\NC_005114_chr15.gbk#0	111246239	NC_005114.4	-	4717	3679037..3674321	108352872		LOC108352872
LOC108353018	0.001	0.008	0.001	0.157	8.73413	0.052516	0.00601273	0.00601273	Z-024951	LOC108353018	gene		D:\assemblies\Rattus_norvegicus-Rnor_6.0-dbSNP149\Rattus_norvegicus-Rnor_6.0-dbSNP149.genometemplate\sequences\NC_005114_chr15.gbk#0	111246239	NC_005114.4	+	2114	17897229..17899342	108353018		LOC108353018
Cdh24	0.001	0.009	0.139	0.086	9.82688	0.10775	1.61283	0.0109648	Z-025334	Cdh24	gene		D:\assemblies\Rattus_norvegicus-Rnor_6.0-dbSNP149\Rattus_norvegicus-Rnor_6.0-dbSNP149.genometemplate\sequences\NC_005114_chr15.gbk#0	111246239	NC_005114.4	-	9702	33287546..33277845	498515, 1560161		Cdh24
Homez	0.001	0.175	0.237	0.228	185.174	0.767408	1.03756	0.00414425	Z-025342	Homez	gene		D:\assemblies\Rattus_norvegicus-Rnor_6.0-dbSNP149\Rattus_norvegicus-Rnor_6.0-dbSNP149.genometemplate\sequences\NC_005114_chr15.gbk#0	111246239	NC_005114.4	-	17565	33528018..33510454	260325, 628904		Homez
Lrrc63	0.001	0.04	0.026	0.176	42.0094	0.22561	0.146121	0.00537047	Z-025700	Lrrc63	gene		D:\assemblies\Rattus_norvegicus-Rnor_6.0-dbSNP149\Rattus_norvegicus-Rnor_6.0-dbSNP149.genometemplate\sequences\NC_005114_chr15.gbk#0	111246239	NC_005114.4	-	37961	57170467..57132507	364427, 1559507		Lrrc63
LOC108348385	0.085	0.005	0.001	0.001	0.0562584	5.08558	1	90.3967	Z-026201	LOC108348385	gene		D:\assemblies\Rattus_norvegicus-Rnor_6.0-dbSNP149\Rattus_norvegicus-Rnor_6.0-dbSNP149.genometemplate\sequences\NC_005115_chr16.gbk#0	90668790	NC_005115.4	+	14374	19407532..19421905	108348385		LOC108348385
LOC102557578	0.001	0.006	0.001	0.243	6.72004	0.0261255	0.0038877	0.0038877	Z-026325	LOC102557578	gene		D:\assemblies\Rattus_norvegicus-Rnor_6.0-dbSNP149\Rattus_norvegicus-Rnor_6.0-dbSNP149.genometemplate\sequences\NC_005115_chr16.gbk#0	90668790	NC_005115.4	+	8001	22350386..22358386	102557578, 7608857		LOC102557578
LOC108348498	0.001	0.046	0.001	0.101	49.0182	0.458177	0.00934707	0.00934707	Z-026936	LOC108348498	gene		D:\assemblies\Rattus_norvegicus-Rnor_6.0-dbSNP149\Rattus_norvegicus-Rnor_6.0-dbSNP149.genometemplate\sequences\NC_005116_chr17.gbk#0	90843779	NC_005116.4	+	49997	8000413..8050409	108348498		LOC108348498
RGD1561671	0.001	0.017	0.163	0.803	18.2206	0.0214497	0.202923	0.00117722	Z-027034	RGD1561671	gene		D:\assemblies\Rattus_norvegicus-Rnor_6.0-dbSNP149\Rattus_norvegicus-Rnor_6.0-dbSNP149.genometemplate\sequences\NC_005116_chr17.gbk#0	90843779	NC_005116.4	-	680	11916026..11915347	361214, 1561671		RGD1561671
Zfp169	0.001	0.039	0.237	0.316	40.9118	0.122503	0.751543	0.00299431	Z-027124	Zfp169	gene		D:\assemblies\Rattus_norvegicus-Rnor_6.0-dbSNP149\Rattus_norvegicus-Rnor_6.0-dbSNP149.genometemplate\sequences\NC_005116_chr17.gbk#0	90843779	NC_005116.4	+	28006	16443324..16471329	306816, 1304631		Zfp169
C1ql3	0.001	1.452	0.006	0.263	1536.68	5.51594	0.0245667	0.00358951	Z-027728	C1ql3	gene		D:\assemblies\Rattus_norvegicus-Rnor_6.0-dbSNP149\Rattus_norvegicus-Rnor_6.0-dbSNP149.genometemplate\sequences\NC_005116_chr17.gbk#0	90843779	NC_005116.4	-	6496	80320681..80314186	680404, 1591795		C1ql3
LOC102550154	0.001	0.035	0.005	0.188	37.5313	0.188311	0.0269036	0.00501744	Z-027787	LOC102550154	gene		D:\assemblies\Rattus_norvegicus-Rnor_6.0-dbSNP149\Rattus_norvegicus-Rnor_6.0-dbSNP149.genometemplate\sequences\NC_005116_chr17.gbk#0	90843779	NC_005116.4	+	11564	87878219..87889782	102550154, 7534125		LOC102550154
Nme5	0.001	0.006	0.001	0.2	6.29985	0.0297268	0.00471866	0.00471866	Z-028017	Nme5	gene		D:\assemblies\Rattus_norvegicus-Rnor_6.0-dbSNP149\Rattus_norvegicus-Rnor_6.0-dbSNP149.genometemplate\sequences\NC_005117_chr18.gbk#0	88201929	NC_005117.4	-	17182	27374641..27357460	688903, 1583004		Nme5
LOC102554034	0.001	0.035	0.001	0.142	36.7275	0.243771	0.00663729	0.00663729	Z-028194	LOC102554034	gene		D:\assemblies\Rattus_norvegicus-Rnor_6.0-dbSNP149\Rattus_norvegicus-Rnor_6.0-dbSNP149.genometemplate\sequences\NC_005117_chr18.gbk#0	88201929	NC_005117.4	+	9146	38847556..38856701	102554034, 7532326		LOC102554034
LOC108353175	0.001	0.007	0.018	0.15	7.91177	0.0497783	0.118414	0.00629168	Z-028537	LOC108353175	gene		D:\assemblies\Rattus_norvegicus-Rnor_6.0-dbSNP149\Rattus_norvegicus-Rnor_6.0-dbSNP149.genometemplate\sequences\NC_005117_chr18.gbk#0	88201929	NC_005117.4	-	31022	77089761..77058740	108353175		LOC108353175
LOC100909899	0.001	0.001	0.001	0.017	1	0.0542618	0.0542618	0.0542618	Z-028553	LOC100909899	gene		D:\assemblies\Rattus_norvegicus-Rnor_6.0-dbSNP149\Rattus_norvegicus-Rnor_6.0-dbSNP149.genometemplate\sequences\NC_005117_chr18.gbk#0	88201929	NC_005117.4	-	11987	78660097..78648111	100909899, 6501465		LOC100909899
Ccdc113	0.208	0.005	2.351	0.001	0.0219876	4.84717	2487.06	220.45	Z-028677	Ccdc113	gene		D:\assemblies\Rattus_norvegicus-Rnor_6.0-dbSNP149\Rattus_norvegicus-Rnor_6.0-dbSNP149.genometemplate\sequences\NC_005118_chr19.gbk#0	62275575	NC_005118.4	-	20060	9932183..9912124	291847, 1565763		Ccdc113
LOC103694288	0.001	0.246	0.018	0.49	259.887	0.501714	0.0364915	0.00193051	Z-028742	LOC103694288	gene		D:\assemblies\Rattus_norvegicus-Rnor_6.0-dbSNP149\Rattus_norvegicus-Rnor_6.0-dbSNP149.genometemplate\sequences\NC_005118_chr19.gbk#0	62275575	NC_005118.4	+	13367	14432261..14445627	103694288, 9215808		LOC103694288
LOC108353220	0.001	1.115	0.25	0.323	1179.41	3.44919	0.775002	0.00292451	Z-028940	LOC108353220	gene		D:\assemblies\Rattus_norvegicus-Rnor_6.0-dbSNP149\Rattus_norvegicus-Rnor_6.0-dbSNP149.genometemplate\sequences\NC_005118_chr19.gbk#0	62275575	NC_005118.4	-	2152	26980201..26978050	108353220		LOC108353220
LOC685488	0.001	0.004	0.001	0.308	4.25207	0.0130425	0.00306733	0.00306733	Z-028962	LOC685488	gene		D:\assemblies\Rattus_norvegicus-Rnor_6.0-dbSNP149\Rattus_norvegicus-Rnor_6.0-dbSNP149.genometemplate\sequences\NC_005118_chr19.gbk#0	62275575	NC_005118.4	+	4457	28262864..28267320	685488, 1593770		LOC685488
Kiaa0895l	0.001	0.012	0.001	0.181	12.6709	0.0661354	0.00521946	0.00521946	Z-029054	Kiaa0895l	gene		D:\assemblies\Rattus_norvegicus-Rnor_6.0-dbSNP149\Rattus_norvegicus-Rnor_6.0-dbSNP149.genometemplate\sequences\NC_005118_chr19.gbk#0	62275575	NC_005118.4	-	8734	37245217..37236484	688736, 1585272		Kiaa0895l
Agrp	0.001	0.014	0.56	0.327	14.9096	0.0431411	1.71389	0.00289351	Z-029071	Agrp	gene		D:\assemblies\Rattus_norvegicus-Rnor_6.0-dbSNP149\Rattus_norvegicus-Rnor_6.0-dbSNP149.genometemplate\sequences\NC_005118_chr19.gbk#0	62275575	NC_005118.4	-	58935	37584875..37525941	25582, 2068		Agrp
Tsnaxip1	0.001	0.042	0.016	0.233	44.8082	0.181805	0.0679371	0.0040574	Z-029083	Tsnaxip1	gene		D:\assemblies\Rattus_norvegicus-Rnor_6.0-dbSNP149\Rattus_norvegicus-Rnor_6.0-dbSNP149.genometemplate\sequences\NC_005118_chr19.gbk#0	62275575	NC_005118.4	+	17993	37795432..37813424	498944, 1565341		Tsnaxip1	RGD1565341
Calb2	0.001	0.01	0.03	0.197	10.7	0.051415	0.154778	0.00480516	Z-029142	Calb2	gene		D:\assemblies\Rattus_norvegicus-Rnor_6.0-dbSNP149\Rattus_norvegicus-Rnor_6.0-dbSNP149.genometemplate\sequences\NC_005118_chr19.gbk#0	62275575	NC_005118.4	+	26875	41482743..41509617	117059, 620981		Calb2
LOC102546554	0.001	0.04	0.312	0.099	42.6565	0.40877	3.1643	0.00958282	Z-030004	LOC102546554	gene		D:\assemblies\Rattus_norvegicus-Rnor_6.0-dbSNP149\Rattus_norvegicus-Rnor_6.0-dbSNP149.genometemplate\sequences\NC_005119_chr20.gbk#0	56205956	NC_005119.4	-	8967	21498469..21489503	102546554, 7689460		LOC102546554
LOC102551294	0.001	0.001	0.448	0.036	1	0.0259396	12.3016	0.0259396	Z-030199	LOC102551294	gene		D:\assemblies\Rattus_norvegicus-Rnor_6.0-dbSNP149\Rattus_norvegicus-Rnor_6.0-dbSNP149.genometemplate\sequences\NC_005119_chr20.gbk#0	56205956	NC_005119.4	-	5403	44800141..44794739	102551294, 7608307		LOC102551294
Cxcr3	0.001	0.011	3.722	0.264	11.7907	0.0421836	14.0882	0.00357769	Z-030779	Cxcr3	gene		D:\assemblies\Rattus_norvegicus-Rnor_6.0-dbSNP149\Rattus_norvegicus-Rnor_6.0-dbSNP149.genometemplate\sequences\NC_005120_chrX.gbk#0	159970021	NC_005120.4	-	2652	71616997..71614346	84475, 621528		Cxcr3	Gpr9
