# Supplementary material for: Hemmule: A Novel Structure with the Properties of the Stem Cell Niche
Source: Preprints.org preprint supplement (doi:10.20944/preprints201906.0206.v1), 2019-06-21
Supplement: Supplementary file 3 [file S1 Table 3 HvsBM95%confidenceAND4-foldchange.xlsx]

## Sheet: HvsBoneMarrow95percentconfiden
Name	BV - linear total RPKM	BM - linear total RPKM	LN - linear total RPKM	H - linear total RPKM	Fold change BV vs BM	Fold change H vs BM	Fold change H vs LN	Fold change H vs BV	QSeq ID	/qseq_name	Feature Type	Notes	Source File	Source Seq Length	Source Sequence	Strand	Target Length	Target Range	/db_xref	/exception	/gene	/gene_synonym
Aard	0.006	0.001	0.001	0.322	0.157856	0.00293256	0.00293256	0.0185775	Z-015036	Aard	gene		D:\assemblies\Rattus_norvegicus-Rnor_6.0-dbSNP149\Rattus_norvegicus-Rnor_6.0-dbSNP149.genometemplate\sequences\NC_005106_chr7.gbk#0	145729302	NC_005106.4	+	4842	91588458..91593299	246323, 631378		Aard	A5D3
Casp16	0.001	0.001	0.006	0.235	1	0.00401624	0.0242313	0.00401624	Z-018991	Casp16	gene		D:\assemblies\Rattus_norvegicus-Rnor_6.0-dbSNP149\Rattus_norvegicus-Rnor_6.0-dbSNP149.genometemplate\sequences\NC_005109_chr10.gbk#0	112626471	NC_005109.4	-	6560	12885492..12878933	680728, 1588238		Casp16
Cdhr4	0.003	0.001	1.101	0.143	0.273842	0.00659787	7.6861	0.0240937	Z-017313	Cdhr4	gene		D:\assemblies\Rattus_norvegicus-Rnor_6.0-dbSNP149\Rattus_norvegicus-Rnor_6.0-dbSNP149.genometemplate\sequences\NC_005107_chr8.gbk#0	133307652	NC_005107.4	+	7866	116771377..116779242	363144, 1306603		Cdhr4
Cfap61	0.018	0.167	0.001	0.001	9.43612	176.256	1	18.6788	Z-008136	Cfap61	gene		D:\assemblies\Rattus_norvegicus-Rnor_6.0-dbSNP149\Rattus_norvegicus-Rnor_6.0-dbSNP149.genometemplate\sequences\NC_005102_chr3.gbk#0	177699992	NC_005102.4	+	280073	140141768..140421840	311496, 1311519		Cfap61
Cnksr2	0.025	0.001	0.003	0.157	0.0375976	0.00602051	0.0216425	0.16013	Z-030601	Cnksr2	gene		D:\assemblies\Rattus_norvegicus-Rnor_6.0-dbSNP149\Rattus_norvegicus-Rnor_6.0-dbSNP149.genometemplate\sequences\NC_005120_chrX.gbk#0	159970021	NC_005120.4	+	242860	39711001..39953860	59322, 708454		Cnksr2
Cxcl1	0.001	1.779	0.055	0.001	1882.43	1882.43	58.2685	1	Z-024056	Cxcl1	gene		D:\assemblies\Rattus_norvegicus-Rnor_6.0-dbSNP149\Rattus_norvegicus-Rnor_6.0-dbSNP149.genometemplate\sequences\NC_005113_chr14.gbk#0	115493446	NC_005113.4	-	1780	18745457..18743678	81503, 619869		Cxcl1	CINC-1, Gro1
Dlk1	0.243	0.001	0.156	0.304	0.00388557	0.00310475	0.511499	0.799045	Z-013697	Dlk1	gene		D:\assemblies\Rattus_norvegicus-Rnor_6.0-dbSNP149\Rattus_norvegicus-Rnor_6.0-dbSNP149.genometemplate\sequences\NC_005105_chr6.gbk#0	147991367	NC_005105.4	+	7239	133576513..133583751	114587, 619931		Dlk1	Pref-1, Zog
Fam186b	0.004	0.146	0.013	0.001	37.6534	154.341	13.638	4.099	Z-015724	Fam186b	gene		D:\assemblies\Rattus_norvegicus-Rnor_6.0-dbSNP149\Rattus_norvegicus-Rnor_6.0-dbSNP149.genometemplate\sequences\NC_005106_chr7.gbk#0	145729302	NC_005106.4	-	15427	140951071..140935645	500931, 1559522		Fam186b	RGD1559522
Fam26d	0.001	0.344	0.201	0.001	364.013	364.013	212.87	1	Z-030052	Fam26d	gene		D:\assemblies\Rattus_norvegicus-Rnor_6.0-dbSNP149\Rattus_norvegicus-Rnor_6.0-dbSNP149.genometemplate\sequences\NC_005119_chr20.gbk#0	56205956	NC_005119.4	-	4461	27578269..27573809	499445, 1595701		Fam26d
Fetub	0.008	0.001	0.001	0.277	0.122035	0.00341268	0.00341268	0.0279647	Z-021763	Fetub	gene		D:\assemblies\Rattus_norvegicus-Rnor_6.0-dbSNP149\Rattus_norvegicus-Rnor_6.0-dbSNP149.genometemplate\sequences\NC_005110_chr11.gbk#0	90463843	NC_005110.4	-	11583	81660472..81648890	83928, 69293		Fetub	Fet, IRL685, Pp63
Flrt2	0.239	0.001	0.021	0.317	0.00396266	0.0029828	0.0647679	0.752726	Z-013536	Flrt2	gene		D:\assemblies\Rattus_norvegicus-Rnor_6.0-dbSNP149\Rattus_norvegicus-Rnor_6.0-dbSNP149.genometemplate\sequences\NC_005105_chr6.gbk#0	147991367	NC_005105.4	+	95076	119518459..119613534	299236, 1308574		Flrt2
Ifna5	0.001	0.001	0.001	0.223	1	0.00422898	0.00422898	0.00422898	Z-011485	Ifna5	gene		D:\assemblies\Rattus_norvegicus-Rnor_6.0-dbSNP149\Rattus_norvegicus-Rnor_6.0-dbSNP149.genometemplate\sequences\NC_005104_chr5.gbk#0	173707219	NC_005104.4	+	1087	106951822..106952908	690894, 1306135		Ifna5
Inhbc	0.001	0.618	0.001	0.001	653.568	653.568	1	1	Z-014895	Inhbc	gene		D:\assemblies\Rattus_norvegicus-Rnor_6.0-dbSNP149\Rattus_norvegicus-Rnor_6.0-dbSNP149.genometemplate\sequences\NC_005106_chr7.gbk#0	145729302	NC_005106.4	-	13471	70661475..70648005	64549, 621194		Inhbc
Kcne4	0.007	0.001	0.332	0.701	0.131439	0.00134862	0.473324	0.0102604	Z-018441	Kcne4	gene		D:\assemblies\Rattus_norvegicus-Rnor_6.0-dbSNP149\Rattus_norvegicus-Rnor_6.0-dbSNP149.genometemplate\sequences\NC_005108_chr9.gbk#0	122095297	NC_005108.4	+	4194	84688873..84693066	367302, 1302957		Kcne4
Kctd8	0.008	0.314	0.004	0.001	41.1586	332.114	3.83828	8.06912	Z-024353	Kctd8	gene		D:\assemblies\Rattus_norvegicus-Rnor_6.0-dbSNP149\Rattus_norvegicus-Rnor_6.0-dbSNP149.genometemplate\sequences\NC_005113_chr14.gbk#0	115493446	NC_005113.4	-	246538	62158730..61912193	364148, 1312020		Kctd8
Kif27	0.02	0.187	0.012	0.001	9.2187	198.131	12.736	21.4922	Z-026920	Kif27	gene		D:\assemblies\Rattus_norvegicus-Rnor_6.0-dbSNP149\Rattus_norvegicus-Rnor_6.0-dbSNP149.genometemplate\sequences\NC_005116_chr17.gbk#0	90843779	NC_005116.4	+	75313	6701287..6776599	246209, 621071		Kif27	Krp5
Klhl38	0.024	0.001	0.001	0.152	0.0390701	0.00623539	0.00623539	0.159595	Z-015078	Klhl38	gene		D:\assemblies\Rattus_norvegicus-Rnor_6.0-dbSNP149\Rattus_norvegicus-Rnor_6.0-dbSNP149.genometemplate\sequences\NC_005106_chr7.gbk#0	145729302	NC_005106.4	-	9210	98197163..98187954	314996, 1564169		Klhl38
Krt26	0.005	0.139	0.001	0.001	25.2643	146.632	1	5.80393	Z-020455	Krt26	gene		D:\assemblies\Rattus_norvegicus-Rnor_6.0-dbSNP149\Rattus_norvegicus-Rnor_6.0-dbSNP149.genometemplate\sequences\NC_005109_chr10.gbk#0	112626471	NC_005109.4	-	8868	87248589..87239722	407758, 1303322		Krt26	Ka39
Krt83	0.003	0.001	0.001	0.075	0.284425	0.0126375	0.0126375	0.0444317	Z-015781	Krt83	gene		D:\assemblies\Rattus_norvegicus-Rnor_6.0-dbSNP149\Rattus_norvegicus-Rnor_6.0-dbSNP149.genometemplate\sequences\NC_005106_chr7.gbk#0	145729302	NC_005106.4	-	6838	143085833..143078996	681126, 1583565		Krt83
Lmntd1	0.004	0.363	0.001	0.001	81.7248	384.122	1	4.70019	Z-010698	Lmntd1	gene		D:\assemblies\Rattus_norvegicus-Rnor_6.0-dbSNP149\Rattus_norvegicus-Rnor_6.0-dbSNP149.genometemplate\sequences\NC_005103_chr4.gbk#0	184226339	NC_005103.4	-	246702	179905049..179658348	500362, 1560077		Lmntd1	Ifltd1, RGD1560077
LOC100360821	0.001	0.252	0.005	0.001	267.036	267.036	4.83102	1	Z-011124	LOC100360821	gene		D:\assemblies\Rattus_norvegicus-Rnor_6.0-dbSNP149\Rattus_norvegicus-Rnor_6.0-dbSNP149.genometemplate\sequences\NC_005104_chr5.gbk#0	173707219	NC_005104.4	+	5934	58416058..58421991	100360821, 2321337		LOC100360821
LOC100362987	0.001	0.89	1.489	0.001	941.361	941.361	1575.64	1	Z-017725	LOC100362987	gene		D:\assemblies\Rattus_norvegicus-Rnor_6.0-dbSNP149\Rattus_norvegicus-Rnor_6.0-dbSNP149.genometemplate\sequences\NC_005108_chr9.gbk#0	122095297	NC_005108.4	-	322	10737845..10737524	100362987, 2323707		LOC100362987
LOC100909761	0.004	0.001	0.001	0.044	0.235752	0.0217173	0.0217173	0.092119	Z-028554	LOC100909761	gene		D:\assemblies\Rattus_norvegicus-Rnor_6.0-dbSNP149\Rattus_norvegicus-Rnor_6.0-dbSNP149.genometemplate\sequences\NC_005117_chr18.gbk#0	88201929	NC_005117.4	-	19554	78681196..78661643	100909761, 6502123		LOC100909761
LOC100909899	0.001	0.001	0.001	0.017	1	0.0542618	0.0542618	0.0542618	Z-028553	LOC100909899	gene		D:\assemblies\Rattus_norvegicus-Rnor_6.0-dbSNP149\Rattus_norvegicus-Rnor_6.0-dbSNP149.genometemplate\sequences\NC_005117_chr18.gbk#0	88201929	NC_005117.4	-	11987	78660097..78648111	100909899, 6501465		LOC100909899
LOC100912306	0.004	0.001	0.001	0.044	0.235752	0.0217173	0.0217173	0.092119	Z-018012	LOC100912306	gene		D:\assemblies\Rattus_norvegicus-Rnor_6.0-dbSNP149\Rattus_norvegicus-Rnor_6.0-dbSNP149.genometemplate\sequences\NC_005108_chr9.gbk#0	122095297	NC_005108.4	+	19565	37727934..37747498	100912306, 6487654		LOC100912306
LOC100912348	0.001	0.001	0.001	0.017	1	0.0542618	0.0542618	0.0542618	Z-018013	LOC100912348	gene		D:\assemblies\Rattus_norvegicus-Rnor_6.0-dbSNP149\Rattus_norvegicus-Rnor_6.0-dbSNP149.genometemplate\sequences\NC_005108_chr9.gbk#0	122095297	NC_005108.4	+	11992	37749031..37761022	100912348, 6487168		LOC100912348
LOC102547294	0.005	0.162	0.01	0.001	30.1163	171.27	10.6787	5.68693	Z-026256	LOC102547294	gene		D:\assemblies\Rattus_norvegicus-Rnor_6.0-dbSNP149\Rattus_norvegicus-Rnor_6.0-dbSNP149.genometemplate\sequences\NC_005115_chr16.gbk#0	90668790	NC_005115.4	-	15951	20483375..20467425	102547294, 7549926		LOC102547294
LOC102548219	0.001	0.099	0.119	0.001	104.472	104.472	125.454	1	Z-024950	LOC102548219	gene		D:\assemblies\Rattus_norvegicus-Rnor_6.0-dbSNP149\Rattus_norvegicus-Rnor_6.0-dbSNP149.genometemplate\sequences\NC_005114_chr15.gbk#0	111246239	NC_005114.4	-	9671	17882719..17873049	102548219, 7598626		LOC102548219
LOC102548264	0.001	0.11	0.003	0.001	115.986	115.986	3.36512	1	Z-029128	LOC102548264	gene		D:\assemblies\Rattus_norvegicus-Rnor_6.0-dbSNP149\Rattus_norvegicus-Rnor_6.0-dbSNP149.genometemplate\sequences\NC_005118_chr19.gbk#0	62275575	NC_005118.4	+	6349	39406909..39413257	102548264, 7631883		LOC102548264
LOC102548277	0.001	0.972	0.251	0.001	1028.61	1028.61	265.218	1	Z-007198	LOC102548277	gene		D:\assemblies\Rattus_norvegicus-Rnor_6.0-dbSNP149\Rattus_norvegicus-Rnor_6.0-dbSNP149.genometemplate\sequences\NC_005102_chr3.gbk#0	177699992	NC_005102.4	-	20518	71105173..71084656	102548277, 7598318		LOC102548277
LOC102548621	0.116	0.001	2.893	0.18	0.00816704	0.00525608	16.0884	0.643572	Z-014391	LOC102548621	gene		D:\assemblies\Rattus_norvegicus-Rnor_6.0-dbSNP149\Rattus_norvegicus-Rnor_6.0-dbSNP149.genometemplate\sequences\NC_005106_chr7.gbk#0	145729302	NC_005106.4	-	10970	15242085..15231116	102548621, 7689066		LOC102548621
LOC102548829	0.031	0.001	0.001	0.378	0.0302789	0.00250051	0.00250051	0.0825826	Z-021449	LOC102548829	gene		D:\assemblies\Rattus_norvegicus-Rnor_6.0-dbSNP149\Rattus_norvegicus-Rnor_6.0-dbSNP149.genometemplate\sequences\NC_005110_chr11.gbk#0	90463843	NC_005110.4	-	28869	52838816..52809948	102548829, 7583323		LOC102548829
LOC102548933	0.001	1.777	0.001	0.001	1880.27	1880.27	1	1	Z-006700	LOC102548933	gene		D:\assemblies\Rattus_norvegicus-Rnor_6.0-dbSNP149\Rattus_norvegicus-Rnor_6.0-dbSNP149.genometemplate\sequences\NC_005102_chr3.gbk#0	177699992	NC_005102.4	+	2284	14573149..14575432	102548933, 7519388		LOC102548933
LOC102549044	0.001	0.127	0.002	0.001	134.782	134.782	2.52237	1	Z-002619	LOC102549044	gene		D:\assemblies\Rattus_norvegicus-Rnor_6.0-dbSNP149\Rattus_norvegicus-Rnor_6.0-dbSNP149.genometemplate\sequences\NC_005100_chr1.gbk#0	282763074	NC_005100.4	-	15413	184829231..184813819	102549044, 7746979		LOC102549044
LOC102549059	0.086	0.001	0.005	0.275	0.0109982	0.00343883	0.0175444	0.312671	Z-027189	LOC102549059	gene		D:\assemblies\Rattus_norvegicus-Rnor_6.0-dbSNP149\Rattus_norvegicus-Rnor_6.0-dbSNP149.genometemplate\sequences\NC_005116_chr17.gbk#0	90843779	NC_005116.4	-	1784	21706504..21704721	102549059, 7666938		LOC102549059
LOC102549381	0.005	0.26	0.006	0.001	49.0168	275.305	6.08079	5.61653	Z-006368	LOC102549381	gene		D:\assemblies\Rattus_norvegicus-Rnor_6.0-dbSNP149\Rattus_norvegicus-Rnor_6.0-dbSNP149.genometemplate\sequences\NC_005102_chr3.gbk#0	177699992	NC_005102.4	-	7297	1632307..1625011	102549381, 7632280		LOC102549381
LOC102550216	0.024	0.001	0.028	0.223	0.0398417	0.0042364	0.125005	0.106331	Z-014530	LOC102550216	gene		D:\assemblies\Rattus_norvegicus-Rnor_6.0-dbSNP149\Rattus_norvegicus-Rnor_6.0-dbSNP149.genometemplate\sequences\NC_005106_chr7.gbk#0	145729302	NC_005106.4	-	2370	27310748..27308379	102550216, 7623618		LOC102550216
LOC102551838	0.017	0.197	0.055	0.001	11.3499	208.871	57.8318	18.4029	Z-004944	LOC102551838	gene		D:\assemblies\Rattus_norvegicus-Rnor_6.0-dbSNP149\Rattus_norvegicus-Rnor_6.0-dbSNP149.genometemplate\sequences\NC_005101_chr2.gbk#0	266435125	NC_005101.4	-	8247	122299600..122291354	102551838, 7544750		LOC102551838
LOC102551996	0.005	0.324	0.005	0.001	60.5022	343.01	5.36203	5.66938	Z-014199	LOC102551996	gene		D:\assemblies\Rattus_norvegicus-Rnor_6.0-dbSNP149\Rattus_norvegicus-Rnor_6.0-dbSNP149.genometemplate\sequences\NC_005106_chr7.gbk#0	145729302	NC_005106.4	-	14219	10959125..10944907	102551996, 7693709		LOC102551996
LOC102553583	0.001	0.084	0.045	0.001	88.4164	88.4164	47.9986	1	Z-006308	LOC102553583	gene		D:\assemblies\Rattus_norvegicus-Rnor_6.0-dbSNP149\Rattus_norvegicus-Rnor_6.0-dbSNP149.genometemplate\sequences\NC_005101_chr2.gbk#0	266435125	NC_005101.4	-	21031	260337407..260316377	102553583, 7692119		LOC102553583
LOC102553607	0.099	1.5	0.006	0.001	15.2075	1587.17	5.94459	104.368	Z-016704	LOC102553607	gene		D:\assemblies\Rattus_norvegicus-Rnor_6.0-dbSNP149\Rattus_norvegicus-Rnor_6.0-dbSNP149.genometemplate\sequences\NC_005107_chr8.gbk#0	133307652	NC_005107.4	-	21596	61741224..61719629	102553607, 7498715		LOC102553607
LOC102554024	0.015	0.001	0.018	0.28	0.0627028	0.00337428	0.065606	0.0538139	Z-024203	LOC102554024	gene		D:\assemblies\Rattus_norvegicus-Rnor_6.0-dbSNP149\Rattus_norvegicus-Rnor_6.0-dbSNP149.genometemplate\sequences\NC_005113_chr14.gbk#0	115493446	NC_005113.4	-	1376	35557391..35556016	102554024, 7573251		LOC102554024
LOC102554318	0.001	0.265	0.003	0.001	280.712	280.712	3.22853	1	Z-009949	LOC102554318	gene		D:\assemblies\Rattus_norvegicus-Rnor_6.0-dbSNP149\Rattus_norvegicus-Rnor_6.0-dbSNP149.genometemplate\sequences\NC_005103_chr4.gbk#0	184226339	NC_005103.4	-	5861	118320831..118314971	102554318, 7589793		LOC102554318
LOC102555240	0.008	0.348	0.005	0.001	44.5375	368.167	5.33448	8.26646	Z-018812	LOC102555240	gene		D:\assemblies\Rattus_norvegicus-Rnor_6.0-dbSNP149\Rattus_norvegicus-Rnor_6.0-dbSNP149.genometemplate\sequences\NC_005109_chr10.gbk#0	112626471	NC_005109.4	+	25894	1018903..1044796	102555240, 7534912		LOC102555240
LOC103690585	0.011	0.231	0.02	0.001	21.5892	243.938	20.7697	11.2991	Z-018714	LOC103690585	gene		D:\assemblies\Rattus_norvegicus-Rnor_6.0-dbSNP149\Rattus_norvegicus-Rnor_6.0-dbSNP149.genometemplate\sequences\NC_005108_chr9.gbk#0	122095297	NC_005108.4	+	9162	113276230..113285391	103690585, 9090471		LOC103690585
LOC103690926	0.007	0.245	0.025	0.001	36.9243	259.082	26.558	7.01657	Z-000166	LOC103690926	gene		D:\assemblies\Rattus_norvegicus-Rnor_6.0-dbSNP149\Rattus_norvegicus-Rnor_6.0-dbSNP149.genometemplate\sequences\NC_005100_chr1.gbk#0	282763074	NC_005100.4	+	5084	14450624..14455707	103690926, 9294111		LOC103690926
LOC103691483	0.095	0.685	0.555	0.001	7.18174	724.45	587.485	100.874	Z-004640	LOC103691483	gene		D:\assemblies\Rattus_norvegicus-Rnor_6.0-dbSNP149\Rattus_norvegicus-Rnor_6.0-dbSNP149.genometemplate\sequences\NC_005101_chr2.gbk#0	266435125	NC_005101.4	+	8165	60735521..60743685	103691483, 9387191		LOC103691483
LOC103691619	0.005	0.755	0.005	0.001	146.75	798.802	5.57594	5.44326	Z-005410	LOC103691619	gene		D:\assemblies\Rattus_norvegicus-Rnor_6.0-dbSNP149\Rattus_norvegicus-Rnor_6.0-dbSNP149.genometemplate\sequences\NC_005101_chr2.gbk#0	266435125	NC_005101.4	-	2797	188626941..188624145	103691619, 9305039		LOC103691619
LOC103692551	0.001	0.481	0.454	0.001	508.567	508.567	479.84	1	Z-012662	LOC103692551	gene		D:\assemblies\Rattus_norvegicus-Rnor_6.0-dbSNP149\Rattus_norvegicus-Rnor_6.0-dbSNP149.genometemplate\sequences\NC_005105_chr6.gbk#0	147991367	NC_005105.4	-	1969	10671264..10669296	103692551, 9406116		LOC103692551
LOC103692596	0.006	0.001	0.053	0.359	0.169274	0.00263466	0.146367	0.0155645	Z-012881	LOC103692596	gene		D:\assemblies\Rattus_norvegicus-Rnor_6.0-dbSNP149\Rattus_norvegicus-Rnor_6.0-dbSNP149.genometemplate\sequences\NC_005105_chr6.gbk#0	147991367	NC_005105.4	+	7854	34016616..34024469	103692596, 9404565		LOC103692596
LOC103692721	0.009	0.001	35.971	0.549	0.105553	0.00172186	65.5321	0.0163128	Z-013848	LOC103692721	gene		D:\assemblies\Rattus_norvegicus-Rnor_6.0-dbSNP149\Rattus_norvegicus-Rnor_6.0-dbSNP149.genometemplate\sequences\NC_005105_chr6.gbk#0	147991367	NC_005105.4	-	594	138052405..138051812	103692721, 9394498		LOC103692721
LOC103692840	0.006	0.001	0.001	0.431	0.156792	0.00219302	0.00219302	0.0139868	Z-014681	LOC103692840	gene		D:\assemblies\Rattus_norvegicus-Rnor_6.0-dbSNP149\Rattus_norvegicus-Rnor_6.0-dbSNP149.genometemplate\sequences\NC_005106_chr7.gbk#0	145729302	NC_005106.4	+	106847	41752117..41858963	103692840, 9126689		LOC103692840
LOC103692862	0.006	0.001	0.068	0.858	0.155679	0.00110106	0.0794135	0.00707264	Z-014768	LOC103692862	gene		D:\assemblies\Rattus_norvegicus-Rnor_6.0-dbSNP149\Rattus_norvegicus-Rnor_6.0-dbSNP149.genometemplate\sequences\NC_005106_chr7.gbk#0	145729302	NC_005106.4	+	1372	59617256..59618627	103692862, 9267741		LOC103692862
LOC103693805	0.602	0.001	0.545	0.458	0.00156988	0.00206191	1.18834	1.31342	Z-025931	LOC103693805	gene		D:\assemblies\Rattus_norvegicus-Rnor_6.0-dbSNP149\Rattus_norvegicus-Rnor_6.0-dbSNP149.genometemplate\sequences\NC_005114_chr15.gbk#0	111246239	NC_005114.4	-	2427	108526031..108523605	103693805, 9200690		LOC103693805
LOC103694396	0.02	0.001	0.051	0.311	0.0478028	0.00303819	0.163492	0.0635567	Z-029848	LOC103694396	gene		D:\assemblies\Rattus_norvegicus-Rnor_6.0-dbSNP149\Rattus_norvegicus-Rnor_6.0-dbSNP149.genometemplate\sequences\NC_005119_chr20.gbk#0	56205956	NC_005119.4	+	5071	10597303..10602373	103694396, 9099877		LOC103694396
LOC108350038	0.014	0.173	0.001	0.001	12.3476	183.428	1	14.8553	Z-005238	LOC108350038	gene		D:\assemblies\Rattus_norvegicus-Rnor_6.0-dbSNP149\Rattus_norvegicus-Rnor_6.0-dbSNP149.genometemplate\sequences\NC_005101_chr2.gbk#0	266435125	NC_005101.4	-	40548	175697647..175657100	108350038		LOC108350038
LOC108350108	0.001	0.294	0.011	0.001	311.398	311.398	11.947	1	Z-006092	LOC108350108	gene		D:\assemblies\Rattus_norvegicus-Rnor_6.0-dbSNP149\Rattus_norvegicus-Rnor_6.0-dbSNP149.genometemplate\sequences\NC_005101_chr2.gbk#0	266435125	NC_005101.4	+	23462	236480703..236504164	108350108		LOC108350108
LOC108350119	0.001	0.398	0.001	0.001	420.96	420.96	1	1	Z-006139	LOC108350119	gene		D:\assemblies\Rattus_norvegicus-Rnor_6.0-dbSNP149\Rattus_norvegicus-Rnor_6.0-dbSNP149.genometemplate\sequences\NC_005101_chr2.gbk#0	266435125	NC_005101.4	+	140443	242314236..242454678	108350119		LOC108350119
LOC108350120	0.001	0.039	0.001	0.001	40.9594	40.9594	1	1	Z-006143	LOC108350120	gene		D:\assemblies\Rattus_norvegicus-Rnor_6.0-dbSNP149\Rattus_norvegicus-Rnor_6.0-dbSNP149.genometemplate\sequences\NC_005101_chr2.gbk#0	266435125	NC_005101.4	-	59755	242712704..242652950	108350120		LOC108350120
LOC108350378	0.005	0.085	0.045	0.001	16.859	89.7198	47.6695	5.32177	Z-006980	LOC108350378	gene		D:\assemblies\Rattus_norvegicus-Rnor_6.0-dbSNP149\Rattus_norvegicus-Rnor_6.0-dbSNP149.genometemplate\sequences\NC_005102_chr3.gbk#0	177699992	NC_005102.4	-	27992	45554205..45526214	108350378		LOC108350378
LOC108350409	0.007	0.07	0.002	0.001	9.83227	74.4764	2.56956	7.57469	Z-007179	LOC108350409	gene		D:\assemblies\Rattus_norvegicus-Rnor_6.0-dbSNP149\Rattus_norvegicus-Rnor_6.0-dbSNP149.genometemplate\sequences\NC_005102_chr3.gbk#0	177699992	NC_005102.4	+	22448	66547457..66569904	108350409		LOC108350409
LOC108350668	0.003	0.22	0.009	0.001	64.1391	233.252	9.50053	3.63666	Z-009053	LOC108350668	gene		D:\assemblies\Rattus_norvegicus-Rnor_6.0-dbSNP149\Rattus_norvegicus-Rnor_6.0-dbSNP149.genometemplate\sequences\NC_005103_chr4.gbk#0	184226339	NC_005103.4	-	7024	28050573..28043550	108350668		LOC108350668
LOC108350981	0.036	0.894	0.005	0.001	25.0949	946.278	5.57306	37.7079	Z-011352	LOC108350981	gene		D:\assemblies\Rattus_norvegicus-Rnor_6.0-dbSNP149\Rattus_norvegicus-Rnor_6.0-dbSNP149.genometemplate\sequences\NC_005104_chr5.gbk#0	173707219	NC_005104.4	-	9462	77988192..77978731	108350981		LOC108350981
LOC108351272	0.001	0.856	0.02	0.001	905.907	905.907	21.0268	1	Z-013426	LOC108351272	gene		D:\assemblies\Rattus_norvegicus-Rnor_6.0-dbSNP149\Rattus_norvegicus-Rnor_6.0-dbSNP149.genometemplate\sequences\NC_005105_chr6.gbk#0	147991367	NC_005105.4	-	7108	107596648..107589541	108351272		LOC108351272
LOC108351473	0.001	1.135	0.001	0.001	1200.5	1200.5	1	1	Z-014865	LOC108351473	gene		D:\assemblies\Rattus_norvegicus-Rnor_6.0-dbSNP149\Rattus_norvegicus-Rnor_6.0-dbSNP149.genometemplate\sequences\NC_005106_chr7.gbk#0	145729302	NC_005106.4	-	2158	70259389..70257232	108351473		LOC108351473
LOC108352083	0.103	1.346	0.173	0.31	13.0524	4.34645	0.558652	0.332999	Z-019403	LOC108352083	gene		D:\assemblies\Rattus_norvegicus-Rnor_6.0-dbSNP149\Rattus_norvegicus-Rnor_6.0-dbSNP149.genometemplate\sequences\NC_005109_chr10.gbk#0	112626471	NC_005109.4	-	25506	38538171..38512666	108352083		LOC108352083
LOC108352106	0.022	0.643	0.004	0.001	29.7709	680.304	4.31943	22.8513	Z-019934	LOC108352106	gene		D:\assemblies\Rattus_norvegicus-Rnor_6.0-dbSNP149\Rattus_norvegicus-Rnor_6.0-dbSNP149.genometemplate\sequences\NC_005109_chr10.gbk#0	112626471	NC_005109.4	+	18407	62036193..62054599	108352106		LOC108352106
LOC108352169	0.001	0.164	0.017	0.001	173.132	173.132	18.3055	1	Z-021058	LOC108352169	gene		D:\assemblies\Rattus_norvegicus-Rnor_6.0-dbSNP149\Rattus_norvegicus-Rnor_6.0-dbSNP149.genometemplate\sequences\NC_005109_chr10.gbk#0	112626471	NC_005109.4	+	1975	111205897..111207871	108352169		LOC108352169
LOC108352365	0.001	0.3	0.004	0.001	317.757	317.757	3.84121	1	Z-021889	LOC108352365	gene		D:\assemblies\Rattus_norvegicus-Rnor_6.0-dbSNP149\Rattus_norvegicus-Rnor_6.0-dbSNP149.genometemplate\sequences\NC_005110_chr11.gbk#0	90463843	NC_005110.4	+	2142	87450743..87452884	108352365		LOC108352365
LOC108353182	0.001	0.177	0.001	0.001	187.457	187.457	1	1	Z-028150	LOC108353182	gene		D:\assemblies\Rattus_norvegicus-Rnor_6.0-dbSNP149\Rattus_norvegicus-Rnor_6.0-dbSNP149.genometemplate\sequences\NC_005117_chr18.gbk#0	88201929	NC_005117.4	+	10771	32549771..32560541	108353182		LOC108353182
LOC500881	0.005	0.367	0.013	0.001	77.0755	388.334	14.1111	5.03837	Z-015153	LOC500881	gene		D:\assemblies\Rattus_norvegicus-Rnor_6.0-dbSNP149\Rattus_norvegicus-Rnor_6.0-dbSNP149.genometemplate\sequences\NC_005106_chr7.gbk#0	145729302	NC_005106.4	-	2674	108551714..108549041	500881, 1594370		LOC500881
LOC501317	0.012	0.172	0.022	0.001	14.1306	182.131	22.8819	12.8891	Z-028956	LOC501317	gene		D:\assemblies\Rattus_norvegicus-Rnor_6.0-dbSNP149\Rattus_norvegicus-Rnor_6.0-dbSNP149.genometemplate\sequences\NC_005118_chr19.gbk#0	62275575	NC_005118.4	+	968185	28000948..28969132	501317, 1588425		LOC501317
LOC679818	0.001	0.001	0.002	0.034	1	0.0275872	0.0726481	0.0275872	Z-009347	LOC679818	gene		D:\assemblies\Rattus_norvegicus-Rnor_6.0-dbSNP149\Rattus_norvegicus-Rnor_6.0-dbSNP149.genometemplate\sequences\NC_005103_chr4.gbk#0	184226339	NC_005103.4	+	34448	68424544..68458991	679818, 1583670		LOC679818
LOC690781	0.001	0.9	0.133	0.001	951.915	951.915	140.899	1	Z-006758	LOC690781	gene		D:\assemblies\Rattus_norvegicus-Rnor_6.0-dbSNP149\Rattus_norvegicus-Rnor_6.0-dbSNP149.genometemplate\sequences\NC_005102_chr3.gbk#0	177699992	NC_005102.4	+	814	17427718..17428531	690781		LOC690781
LOC690884	0.782	0.001	7.399	0.531	0.00120851	0.00178062	13.9389	1.47341	Z-006744	LOC690884	gene		D:\assemblies\Rattus_norvegicus-Rnor_6.0-dbSNP149\Rattus_norvegicus-Rnor_6.0-dbSNP149.genometemplate\sequences\NC_005102_chr3.gbk#0	177699992	NC_005102.4	+	883	16816984..16817866	690884		LOC690884
LOC691840	0.057	0.001	1.111	0.953	0.0165593	0.000991643	1.16591	0.0598845	Z-013932	LOC691840	gene		D:\assemblies\Rattus_norvegicus-Rnor_6.0-dbSNP149\Rattus_norvegicus-Rnor_6.0-dbSNP149.genometemplate\sequences\NC_005105_chr6.gbk#0	147991367	NC_005105.4	-	477	141112671..141112195	691840		LOC691840
LOC691925	0.066	0.001	1.016	0.73	0.0143472	0.00129466	1.3911	0.090238	Z-013965	LOC691925	gene		D:\assemblies\Rattus_norvegicus-Rnor_6.0-dbSNP149\Rattus_norvegicus-Rnor_6.0-dbSNP149.genometemplate\sequences\NC_005105_chr6.gbk#0	147991367	NC_005105.4	-	493	142585251..142584759	691925		LOC691925
Mmp21	0.001	0.303	0.003	0.001	320.906	320.906	3.41602	1	Z-002963	Mmp21	gene		D:\assemblies\Rattus_norvegicus-Rnor_6.0-dbSNP149\Rattus_norvegicus-Rnor_6.0-dbSNP149.genometemplate\sequences\NC_005100_chr1.gbk#0	282763074	NC_005100.4	-	5668	205750786..205745119	293573, 1309332		Mmp21
Mogat3	0.001	0.814	0.024	0.001	861.059	861.059	25.9169	1	Z-022368	Mogat3	gene		D:\assemblies\Rattus_norvegicus-Rnor_6.0-dbSNP149\Rattus_norvegicus-Rnor_6.0-dbSNP149.genometemplate\sequences\NC_005111_chr12.gbk#0	52716770	NC_005111.4	-	2166	22710787..22708622	685560, 1592588		Mogat3
Mrgprb3	0.007	0.001	0.001	0.246	0.126945	0.00384318	0.00384318	0.0302743	Z-001704	Mrgprb3	gene		D:\assemblies\Rattus_norvegicus-Rnor_6.0-dbSNP149\Rattus_norvegicus-Rnor_6.0-dbSNP149.genometemplate\sequences\NC_005100_chr1.gbk#0	282763074	NC_005100.4	-	12908	103909958..103897051	691194, 1587398		Mrgprb3
Myot	0.004	0.001	0.001	0.058	0.214171	0.0162825	0.0162825	0.0760255	Z-028165	Myot	gene		D:\assemblies\Rattus_norvegicus-Rnor_6.0-dbSNP149\Rattus_norvegicus-Rnor_6.0-dbSNP149.genometemplate\sequences\NC_005117_chr18.gbk#0	88201929	NC_005117.4	+	19564	35573978..35593541	291605, 1310569		Myot	Ttid
Ndnf	0.071	0.001	0.145	0.321	0.013394	0.00294576	0.453437	0.219931	Z-009717	Ndnf	gene		D:\assemblies\Rattus_norvegicus-Rnor_6.0-dbSNP149\Rattus_norvegicus-Rnor_6.0-dbSNP149.genometemplate\sequences\NC_005103_chr4.gbk#0	184226339	NC_005103.4	+	36951	96528830..96565780	312401, 1311080		Ndnf
Ntn1	0.006	0.001	0.016	0.111	0.153035	0.00848303	0.14588	0.0554321	Z-019689	Ntn1	gene		D:\assemblies\Rattus_norvegicus-Rnor_6.0-dbSNP149\Rattus_norvegicus-Rnor_6.0-dbSNP149.genometemplate\sequences\NC_005109_chr10.gbk#0	112626471	NC_005109.4	-	220148	54982072..54761925	114523, 619809		Ntn1	netrin-1
Nxpe5	0.009	0.712	0.43	0.001	77.1247	752.911	455.136	9.76225	Z-022272	Nxpe5	gene		D:\assemblies\Rattus_norvegicus-Rnor_6.0-dbSNP149\Rattus_norvegicus-Rnor_6.0-dbSNP149.genometemplate\sequences\NC_005111_chr12.gbk#0	52716770	NC_005111.4	-	11842	19440791..19428950	680711, 1588255		Nxpe5
Olr1596	0.01	0.001	0.005	0.781	0.0968633	0.00120962	0.00629409	0.012488	Z-023539	Olr1596	gene		D:\assemblies\Rattus_norvegicus-Rnor_6.0-dbSNP149\Rattus_norvegicus-Rnor_6.0-dbSNP149.genometemplate\sequences\NC_005112_chr13.gbk#0	114033958	NC_005112.4	+	966	92249759..92250724	304991, 1333784		Olr1596	ratchr13-90126336-90127301_ORF
Phlda2	0.001	0.001	0.686	0.324	1	0.00291896	2.11748	0.00291896	Z-003180	Phlda2	gene		D:\assemblies\Rattus_norvegicus-Rnor_6.0-dbSNP149\Rattus_norvegicus-Rnor_6.0-dbSNP149.genometemplate\sequences\NC_005100_chr1.gbk#0	282763074	NC_005100.4	-	3135	216704479..216701345	293637, 1304755		Phlda2
Pla2g3	0.017	1.087	0.017	0.001	62.6284	1149.67	17.5019	18.357	Z-024535	Pla2g3	gene		D:\assemblies\Rattus_norvegicus-Rnor_6.0-dbSNP149\Rattus_norvegicus-Rnor_6.0-dbSNP149.genometemplate\sequences\NC_005113_chr14.gbk#0	115493446	NC_005113.4	+	5787	83724828..83730614	289733, 1305323		Pla2g3
Prss44	0.001	0.552	0.001	0.001	584.332	584.332	1	1	Z-017400	Prss44	gene		D:\assemblies\Rattus_norvegicus-Rnor_6.0-dbSNP149\Rattus_norvegicus-Rnor_6.0-dbSNP149.genometemplate\sequences\NC_005107_chr8.gbk#0	133307652	NC_005107.4	+	13808	119083900..119097707	501060, 1560940		Prss44	RGD1560940, Tessp4
Rab6b	0.074	0.001	0.058	0.331	0.0128498	0.00285377	0.175683	0.222087	Z-017213	Rab6b	gene		D:\assemblies\Rattus_norvegicus-Rnor_6.0-dbSNP149\Rattus_norvegicus-Rnor_6.0-dbSNP149.genometemplate\sequences\NC_005107_chr8.gbk#0	133307652	NC_005107.4	+	68443	111600375..111668817	363123, 1309958		Rab6b
RGD1307315	0.042	0.001	0.458	0.435	0.0224487	0.00217055	1.05233	0.0966894	Z-013833	RGD1307315	gene		D:\assemblies\Rattus_norvegicus-Rnor_6.0-dbSNP149\Rattus_norvegicus-Rnor_6.0-dbSNP149.genometemplate\sequences\NC_005105_chr6.gbk#0	147991367	NC_005105.4	+	6797	137386694..137393490	362793, 1307315		RGD1307315
RGD1562885	0.004	0.383	0.172	0.001	92.5949	405.499	181.716	4.37928	Z-029603	RGD1562885	gene		D:\assemblies\Rattus_norvegicus-Rnor_6.0-dbSNP149\Rattus_norvegicus-Rnor_6.0-dbSNP149.genometemplate\sequences\NC_005119_chr20.gbk#0	56205956	NC_005119.4	-	1557	3691164..3689608	502412, 1562885		RGD1562885	Stg
RGD1565117	0.008	0.806	0.058	0.001	97.6686	852.327	61.3418	8.72672	Z-014880	RGD1565117	gene		D:\assemblies\Rattus_norvegicus-Rnor_6.0-dbSNP149\Rattus_norvegicus-Rnor_6.0-dbSNP149.genometemplate\sequences\NC_005106_chr7.gbk#0	145729302	NC_005106.4	+	1499	70444563..70446061	299848, 1565117		RGD1565117
RGD1565767	0.001	0.334	0.005	0.001	353.514	353.514	4.80072	1	Z-007069	RGD1565767	gene		D:\assemblies\Rattus_norvegicus-Rnor_6.0-dbSNP149\Rattus_norvegicus-Rnor_6.0-dbSNP149.genometemplate\sequences\NC_005102_chr3.gbk#0	177699992	NC_005102.4	-	637	57192132..57191496	311120, 1565767		RGD1565767
Sema4f	0.005	0.154	1.067	0.001	34.1494	162.94	1129.11	4.77139	Z-009851	Sema4f	gene		D:\assemblies\Rattus_norvegicus-Rnor_6.0-dbSNP149\Rattus_norvegicus-Rnor_6.0-dbSNP149.genometemplate\sequences\NC_005103_chr4.gbk#0	184226339	NC_005103.4	-	26308	113764532..113738225	29745, 3658		Sema4f
Sft2d2	0.001	0.001	0.319	0.427	1	0.0022154	0.748608	0.0022154	Z-023355	Sft2d2	gene		D:\assemblies\Rattus_norvegicus-Rnor_6.0-dbSNP149\Rattus_norvegicus-Rnor_6.0-dbSNP149.genometemplate\sequences\NC_005112_chr13.gbk#0	114033958	NC_005112.4	-	19265	83457899..83438635	360868, 1310623		Sft2d2	RGD1310623
Slc25a33	0.47	3.517	3.55	0.794	7.4873	4.4314	4.47306	0.591855	Z-012398	Slc25a33	gene		D:\assemblies\Rattus_norvegicus-Rnor_6.0-dbSNP149\Rattus_norvegicus-Rnor_6.0-dbSNP149.genometemplate\sequences\NC_005104_chr5.gbk#0	173707219	NC_005104.4	-	25332	166726794..166701463	691431, 1583942		Slc25a33
Slc31a1	2.009	0.001	0.712	0.884	0.000470445	0.00106887	0.805218	2.27203	Z-011357	Slc31a1	gene		D:\assemblies\Rattus_norvegicus-Rnor_6.0-dbSNP149\Rattus_norvegicus-Rnor_6.0-dbSNP149.genometemplate\sequences\NC_005104_chr5.gbk#0	173707219	NC_005104.4	+	26855	78222504..78249358	171135, 620059		Slc31a1	Ctr1, LRRGT00200
Thbs3	0.04	0.001	0.123	0.112	0.0234408	0.00844436	1.09932	0.360242	Z-005401	Thbs3	gene		D:\assemblies\Rattus_norvegicus-Rnor_6.0-dbSNP149\Rattus_norvegicus-Rnor_6.0-dbSNP149.genometemplate\sequences\NC_005101_chr2.gbk#0	266435125	NC_005101.4	+	11760	188528979..188540738	681309, 1596780		Thbs3
Vom1r104	0.001	0.186	0.004	0.001	196.591	196.591	4.39054	1	Z-010023	Vom1r104	gene		D:\assemblies\Rattus_norvegicus-Rnor_6.0-dbSNP149\Rattus_norvegicus-Rnor_6.0-dbSNP149.genometemplate\sequences\NC_005103_chr4.gbk#0	184226339	NC_005103.4	+	966	122169765..122170730	685945, 1587829		Vom1r104	V1ra1
Wfdc15b	0.001	0.001	0.01	0.666	1	0.00141922	0.0153805	0.00141922	Z-008495	Wfdc15b	gene		D:\assemblies\Rattus_norvegicus-Rnor_6.0-dbSNP149\Rattus_norvegicus-Rnor_6.0-dbSNP149.genometemplate\sequences\NC_005102_chr3.gbk#0	177699992	NC_005102.4	-	10154	160617212..160607059	408230, 1303042		Wfdc15b	Pi3, Serpina1c, Skalp, Wfdc14
