# Supplementary material for: Hemmule: A Novel Structure with the Properties of the Stem Cell Niche
Source: Preprints.org preprint supplement (doi:10.20944/preprints201906.0206.v1), 2019-06-21
Supplement: Supplementary file 4 [file S1 Table 4 HvsLN95%confidenceAND4-foldchange.xlsx]

## Sheet: HvsLymphNode95percentconfidenc
Name	BV - linear total RPKM	BM - linear total RPKM	LN - linear total RPKM	H - linear total RPKM	Fold change BV vs BM	Fold change H vs BM	Fold change H vs LN	Fold change H vs BV	QSeq ID	/qseq_name	Feature Type	Notes	Source File	Source Seq Length	Source Sequence	Strand	Target Length	Target Range	/db_xref	/exception	/gene	/gene_synonym
Rnr1	22279.6	22982.6	2042.28	18314.5	1.03155	1.25489	0.111512	1.2165	Z-000002	Rnr1	gene		D:\assemblies\Rattus_norvegicus-Rnor_6.0-dbSNP149\Rattus_norvegicus-Rnor_6.0-dbSNP149.genometemplate\sequences\NC_001665_chrMT.gbk#0	16313	NC_001665.2	+	958	68..1025	170602		Rnr1	mt-Rnr1
Rnr2	19860.7	18603.2	1620.74	14429.3	0.936685	1.28927	0.112323	1.37642	Z-000004	Rnr2	gene		D:\assemblies\Rattus_norvegicus-Rnor_6.0-dbSNP149\Rattus_norvegicus-Rnor_6.0-dbSNP149.genometemplate\sequences\NC_001665_chrMT.gbk#0	16313	NC_001665.2	+	1571	1094..2664	170603		Rnr2	mt-Rnr2
Vom2r6	0.001	0.008	0.071	0.001	8.08067	8.08067	75.179	1	Z-000049	Vom2r6	gene		D:\assemblies\Rattus_norvegicus-Rnor_6.0-dbSNP149\Rattus_norvegicus-Rnor_6.0-dbSNP149.genometemplate\sequences\NC_005100_chr1.gbk#0	282763074	NC_005100.4	-	11030	755645..744616	308257, 1562697		Vom2r6	RGD1562697
LOC103690937	0.001	0.001	1.907	0.001	1	1	2017.83	1	Z-000062	LOC103690937	gene		D:\assemblies\Rattus_norvegicus-Rnor_6.0-dbSNP149\Rattus_norvegicus-Rnor_6.0-dbSNP149.genometemplate\sequences\NC_005100_chr1.gbk#0	282763074	NC_005100.4	+	5594	1637755..1643348	103690937, 9287253		LOC103690937
Katna1	3.161	3.103	23.035	4.344	0.98171	0.714424	5.3033	0.727734	Z-000069	Katna1	gene		D:\assemblies\Rattus_norvegicus-Rnor_6.0-dbSNP149\Rattus_norvegicus-Rnor_6.0-dbSNP149.genometemplate\sequences\NC_005100_chr1.gbk#0	282763074	NC_005100.4	+	41617	1826170..1867786	292464, 1303062		Katna1
Sash1	2.175	2.045	0.414	2.584	0.940406	0.791676	0.160253	0.841845	Z-000077	Sash1	gene		D:\assemblies\Rattus_norvegicus-Rnor_6.0-dbSNP149\Rattus_norvegicus-Rnor_6.0-dbSNP149.genometemplate\sequences\NC_005100_chr1.gbk#0	282763074	NC_005100.4	-	167845	2950749..2782905	365037, 1566017		Sash1
LOC108349797	0.177	1.339	0.02	0.283	7.57279	4.73855	0.071952	0.625734	Z-000078	LOC108349797	gene		D:\assemblies\Rattus_norvegicus-Rnor_6.0-dbSNP149\Rattus_norvegicus-Rnor_6.0-dbSNP149.genometemplate\sequences\NC_005100_chr1.gbk#0	282763074	NC_005100.4	+	12971	3240039..3253009	108349797		LOC108349797
Rab32	7.201	9.552	1.301	9.95	1.32648	0.959981	0.130723	0.723706	Z-000084	Rab32	gene		D:\assemblies\Rattus_norvegicus-Rnor_6.0-dbSNP149\Rattus_norvegicus-Rnor_6.0-dbSNP149.genometemplate\sequences\NC_005100_chr1.gbk#0	282763074	NC_005100.4	-	14558	4653220..4638663	365042, 1559997		Rab32	RGD1559997
LOC102547024	0.003	0.003	0.042	0.001	0.932445	3.165	44.0143	3.3943	Z-000087	LOC102547024	gene		D:\assemblies\Rattus_norvegicus-Rnor_6.0-dbSNP149\Rattus_norvegicus-Rnor_6.0-dbSNP149.genometemplate\sequences\NC_005100_chr1.gbk#0	282763074	NC_005100.4	-	18604	5337229..5318626	102547024, 7501317		LOC102547024
LOC108349486	5.393	12.949	0.004	7.145	2.40114	1.81236	0.000537804	0.754792	Z-000101	LOC108349486	gene		D:\assemblies\Rattus_norvegicus-Rnor_6.0-dbSNP149\Rattus_norvegicus-Rnor_6.0-dbSNP149.genometemplate\sequences\NC_005100_chr1.gbk#0	282763074	NC_005100.4	-	11249	7270185..7258937	108349486		LOC108349486
LOC108349489	0.208	1.188	1.62	0.354	5.70339	3.35337	4.57153	0.587961	Z-000122	LOC108349489	gene		D:\assemblies\Rattus_norvegicus-Rnor_6.0-dbSNP149\Rattus_norvegicus-Rnor_6.0-dbSNP149.genometemplate\sequences\NC_005100_chr1.gbk#0	282763074	NC_005100.4	+	7841	9841642..9849482	108349489		LOC108349489
LOC100909392	4.868	7.941	23.176	4.9	1.63124	1.6204	4.72941	0.993361	Z-000127	LOC100909392	gene		D:\assemblies\Rattus_norvegicus-Rnor_6.0-dbSNP149\Rattus_norvegicus-Rnor_6.0-dbSNP149.genometemplate\sequences\NC_005100_chr1.gbk#0	282763074	NC_005100.4	+	9088	11763326..11772413	100909392, 6504231		LOC100909392
LOC310926	72.412	250.437	359.303	70.082	3.45851	3.57347	5.12688	1.03324	Z-000130	LOC310926	gene		D:\assemblies\Rattus_norvegicus-Rnor_6.0-dbSNP149\Rattus_norvegicus-Rnor_6.0-dbSNP149.genometemplate\sequences\NC_005100_chr1.gbk#0	282763074	NC_005100.4	-	6794	11914539..11907746	310926, 1560890		LOC310926	Aa1011, Aa1262, Ab2-057, Ac1147
LOC108349491	19.982	134.55	5.237	32.978	6.73342	4.07999	0.158814	0.605931	Z-000132	LOC108349491	gene		D:\assemblies\Rattus_norvegicus-Rnor_6.0-dbSNP149\Rattus_norvegicus-Rnor_6.0-dbSNP149.genometemplate\sequences\NC_005100_chr1.gbk#0	282763074	NC_005100.4	-	8073	11957618..11949546	108349491		LOC108349491
LOC103690923	0.007	0.156	0.001	0.589	23.6117	0.265124	0.00160536	0.0112285	Z-000141	LOC103690923	gene		D:\assemblies\Rattus_norvegicus-Rnor_6.0-dbSNP149\Rattus_norvegicus-Rnor_6.0-dbSNP149.genometemplate\sequences\NC_005100_chr1.gbk#0	282763074	NC_005100.4	-	10353	12768190..12757838	103690923, 9250034		LOC103690923
LOC108349444	1.769	7.253	31.54	2.202	4.10047	3.29379	14.3227	0.803271	Z-000148	LOC108349444	gene		D:\assemblies\Rattus_norvegicus-Rnor_6.0-dbSNP149\Rattus_norvegicus-Rnor_6.0-dbSNP149.genometemplate\sequences\NC_005100_chr1.gbk#0	282763074	NC_005100.4	+	1435	13164344..13165778	108349444		LOC108349444
Abracl	41.942	107.735	314.467	62.782	2.56869	1.71601	5.00887	0.668051	Z-000149	Abracl	gene		D:\assemblies\Rattus_norvegicus-Rnor_6.0-dbSNP149\Rattus_norvegicus-Rnor_6.0-dbSNP149.genometemplate\sequences\NC_005100_chr1.gbk#0	282763074	NC_005100.4	-	10191	13175773..13165583	685045, 1583256		Abracl
Slc35d3	0.444	1.959	0.001	0.514	4.41142	3.81388	0.00184038	0.864547	Z-000175	Slc35d3	gene		D:\assemblies\Rattus_norvegicus-Rnor_6.0-dbSNP149\Rattus_norvegicus-Rnor_6.0-dbSNP149.genometemplate\sequences\NC_005100_chr1.gbk#0	282763074	NC_005100.4	-	3473	15301998..15298526	308717, 1309428		Slc35d3
Map7	0.266	1.058	0.112	0.637	3.97205	1.662	0.176045	0.418422	Z-000181	Map7	gene		D:\assemblies\Rattus_norvegicus-Rnor_6.0-dbSNP149\Rattus_norvegicus-Rnor_6.0-dbSNP149.genometemplate\sequences\NC_005100_chr1.gbk#0	282763074	NC_005100.4	+	127539	15620665..15748203	293016, 1308866		Map7	Mtap7
Bclaf1	6.336	10.703	35.716	7.88	1.68933	1.35827	4.53243	0.804031	Z-000183	Bclaf1	gene		D:\assemblies\Rattus_norvegicus-Rnor_6.0-dbSNP149\Rattus_norvegicus-Rnor_6.0-dbSNP149.genometemplate\sequences\NC_005100_chr1.gbk#0	282763074	NC_005100.4	+	29086	15799753..15828838	293017, 1309704		Bclaf1	Aa2-041
LOC108349727	0.001	0.001	0.289	0.001	1	1	305.938	1	Z-000192	LOC108349727	gene		D:\assemblies\Rattus_norvegicus-Rnor_6.0-dbSNP149\Rattus_norvegicus-Rnor_6.0-dbSNP149.genometemplate\sequences\NC_005100_chr1.gbk#0	282763074	NC_005100.4	-	9523	16968049..16958527	108349727		LOC108349727
Themis	0.001	0.039	0.65	0.001	41.5799	41.5799	687.498	1	Z-000194	Themis	gene		D:\assemblies\Rattus_norvegicus-Rnor_6.0-dbSNP149\Rattus_norvegicus-Rnor_6.0-dbSNP149.genometemplate\sequences\NC_005100_chr1.gbk#0	282763074	NC_005100.4	-	225253	17378225..17152973	498985, 1560849		Themis
Arhgap18	11.42	18.948	3.408	13.864	1.65922	1.36677	0.245823	0.823743	Z-000200	Arhgap18	gene		D:\assemblies\Rattus_norvegicus-Rnor_6.0-dbSNP149\Rattus_norvegicus-Rnor_6.0-dbSNP149.genometemplate\sequences\NC_005100_chr1.gbk#0	282763074	NC_005100.4	-	236025	19463139..19227115	293947, 1305053		Arhgap18
Samd3	0.006	0.001	1.687	0.001	0.161814	1	1784.41	6.17992	Z-000204	Samd3	gene		D:\assemblies\Rattus_norvegicus-Rnor_6.0-dbSNP149\Rattus_norvegicus-Rnor_6.0-dbSNP149.genometemplate\sequences\NC_005100_chr1.gbk#0	282763074	NC_005100.4	-	44413	20155960..20111548	685940, 1587834		Samd3
Epb41l2	13.103	19.836	2.999	19.05	1.51388	1.04126	0.157414	0.687806	Z-000210	Epb41l2	gene		D:\assemblies\Rattus_norvegicus-Rnor_6.0-dbSNP149\Rattus_norvegicus-Rnor_6.0-dbSNP149.genometemplate\sequences\NC_005100_chr1.gbk#0	282763074	NC_005100.4	-	185894	21067713..20881820	309557, 1563977		Epb41l2
LOC100364016	10.656	24.404	2.083	12.259	2.29011	1.9907	0.169905	0.869261	Z-000214	LOC100364016	gene		D:\assemblies\Rattus_norvegicus-Rnor_6.0-dbSNP149\Rattus_norvegicus-Rnor_6.0-dbSNP149.genometemplate\sequences\NC_005100_chr1.gbk#0	282763074	NC_005100.4	-	1517	21146879..21145363	100364016, 2321841		LOC100364016
LOC108349248	0.314	0.699	0.001	0.412	2.2252	1.69791	0.00229601	0.763038	Z-000223	LOC108349248	gene		D:\assemblies\Rattus_norvegicus-Rnor_6.0-dbSNP149\Rattus_norvegicus-Rnor_6.0-dbSNP149.genometemplate\sequences\NC_005100_chr1.gbk#0	282763074	NC_005100.4	+	16025	21854553..21870577	108349248		LOC108349248
Moxd1	0.001	0.055	0.164	0.001	57.8753	57.8753	173.908	1	Z-000227	Moxd1	gene		D:\assemblies\Rattus_norvegicus-Rnor_6.0-dbSNP149\Rattus_norvegicus-Rnor_6.0-dbSNP149.genometemplate\sequences\NC_005100_chr1.gbk#0	282763074	NC_005100.4	-	82068	22206565..22124498	294119, 1310033		Moxd1
Sgk1	8.096	13.939	1.066	9.6	1.72171	1.45193	0.111042	0.843305	Z-000269	Sgk1	gene		D:\assemblies\Rattus_norvegicus-Rnor_6.0-dbSNP149\Rattus_norvegicus-Rnor_6.0-dbSNP149.genometemplate\sequences\NC_005100_chr1.gbk#0	282763074	NC_005100.4	-	116859	24302309..24185451	29517, 3668		Sgk1	Sgk
LOC108349833	0.007	0.001	0.322	0.001	0.126924	1	340.661	7.87876	Z-000285	LOC108349833	gene		D:\assemblies\Rattus_norvegicus-Rnor_6.0-dbSNP149\Rattus_norvegicus-Rnor_6.0-dbSNP149.genometemplate\sequences\NC_005100_chr1.gbk#0	282763074	NC_005100.4	+	4876	25900043..25904918	108349833		LOC108349833
LOC108348575	0.007	0.001	0.322	0.001	0.126924	1	340.661	7.87876	Z-000286	LOC108348575	gene		D:\assemblies\Rattus_norvegicus-Rnor_6.0-dbSNP149\Rattus_norvegicus-Rnor_6.0-dbSNP149.genometemplate\sequences\NC_005100_chr1.gbk#0	282763074	NC_005100.4	+	4876	26030457..26035332	108348575		LOC108348575
Rnf217	0.734	3.029	0.255	2.142	4.12792	1.41417	0.119233	0.342587	Z-000291	Rnf217	gene		D:\assemblies\Rattus_norvegicus-Rnor_6.0-dbSNP149\Rattus_norvegicus-Rnor_6.0-dbSNP149.genometemplate\sequences\NC_005100_chr1.gbk#0	282763074	NC_005100.4	+	89623	28301960..28391582	292188, 1306836		Rnf217	Ibrdc1
Lrrc14b	0.01	0.007	0.124	0.001	0.694474	7.45856	131.638	10.7399	Z-000321	Lrrc14b	gene		D:\assemblies\Rattus_norvegicus-Rnor_6.0-dbSNP149\Rattus_norvegicus-Rnor_6.0-dbSNP149.genometemplate\sequences\NC_005100_chr1.gbk#0	282763074	NC_005100.4	+	4172	31531143..31535314	502225, 1564978		Lrrc14b	RGD1564978
Ahrr	0.004	0.005	0.207	0.001	1.17911	5.32525	219.378	4.51634	Z-000325	Ahrr	gene		D:\assemblies\Rattus_norvegicus-Rnor_6.0-dbSNP149\Rattus_norvegicus-Rnor_6.0-dbSNP149.genometemplate\sequences\NC_005100_chr1.gbk#0	282763074	NC_005100.4	+	95033	31603297..31698329	498999, 1559857		Ahrr
Nkd2	6.377	9.841	1.403	9.159	1.54316	1.07449	0.153202	0.696291	Z-000336	Nkd2	gene		D:\assemblies\Rattus_norvegicus-Rnor_6.0-dbSNP149\Rattus_norvegicus-Rnor_6.0-dbSNP149.genometemplate\sequences\NC_005100_chr1.gbk#0	282763074	NC_005100.4	+	31027	32054390..32085416	308068, 1311459		Nkd2
LOC102548924	0.001	0.001	1.243	0.001	1	1	1315.43	1	Z-000342	LOC102548924	gene		D:\assemblies\Rattus_norvegicus-Rnor_6.0-dbSNP149\Rattus_norvegicus-Rnor_6.0-dbSNP149.genometemplate\sequences\NC_005100_chr1.gbk#0	282763074	NC_005100.4	+	31903	32299730..32331632	102548924, 7628562		LOC102548924
Slc6a3	0.001	0.001	0.071	0.001	1	1	75.2264	1	Z-000343	Slc6a3	gene		D:\assemblies\Rattus_norvegicus-Rnor_6.0-dbSNP149\Rattus_norvegicus-Rnor_6.0-dbSNP149.genometemplate\sequences\NC_005100_chr1.gbk#0	282763074	NC_005100.4	-	40973	32363983..32323011	24898, 3715		Slc6a3	Dat1
LOC103690947	0.001	0.001	0.067	0.001	1	1	71.1796	1	Z-000349	LOC103690947	gene		D:\assemblies\Rattus_norvegicus-Rnor_6.0-dbSNP149\Rattus_norvegicus-Rnor_6.0-dbSNP149.genometemplate\sequences\NC_005100_chr1.gbk#0	282763074	NC_005100.4	+	4316	33277555..33281870	103690947, 9115889		LOC103690947
LOC680200	0.047	1.613	6.977	0.361	34.3174	4.47321	19.3472	0.130348	Z-000371	LOC680200	gene		D:\assemblies\Rattus_norvegicus-Rnor_6.0-dbSNP149\Rattus_norvegicus-Rnor_6.0-dbSNP149.genometemplate\sequences\NC_005100_chr1.gbk#0	282763074	NC_005100.4	-	16289	37818879..37802591	680200, 1594231		LOC680200
Akap12	3.102	3.73	0.395	3.848	1.20232	0.969436	0.102789	0.806306	Z-000392	Akap12	gene		D:\assemblies\Rattus_norvegicus-Rnor_6.0-dbSNP149\Rattus_norvegicus-Rnor_6.0-dbSNP149.genometemplate\sequences\NC_005100_chr1.gbk#0	282763074	NC_005100.4	+	90453	40816130..40906582	83425, 70988		Akap12	AKAP12A, AKAP12B, AKAP12G
LOC102546605	0.001	0.005	0.031	0.001	5.09106	5.09106	33.2275	1	Z-000403	LOC102546605	gene		D:\assemblies\Rattus_norvegicus-Rnor_6.0-dbSNP149\Rattus_norvegicus-Rnor_6.0-dbSNP149.genometemplate\sequences\NC_005100_chr1.gbk#0	282763074	NC_005100.4	-	9521	42102497..42092977	102546605, 7752248		LOC102546605
Mtrf1l	3.407	5.667	23.365	2.848	1.66335	1.99018	8.20531	1.19649	Z-000407	Mtrf1l	gene		D:\assemblies\Rattus_norvegicus-Rnor_6.0-dbSNP149\Rattus_norvegicus-Rnor_6.0-dbSNP149.genometemplate\sequences\NC_005100_chr1.gbk#0	282763074	NC_005100.4	-	10209	42485999..42475791	361473, 1598312		Mtrf1l
Cnksr3	2.791	7.227	0.451	4.328	2.58953	1.66971	0.104143	0.644795	Z-000414	Cnksr3	gene		D:\assemblies\Rattus_norvegicus-Rnor_6.0-dbSNP149\Rattus_norvegicus-Rnor_6.0-dbSNP149.genometemplate\sequences\NC_005100_chr1.gbk#0	282763074	NC_005100.4	-	94471	43884267..43789797	308113, 1307544		Cnksr3	Magi1, Prp4
Rsph3	0.409	0.082	1.485	0.175	0.200698	0.469427	8.49527	2.33898	Z-000446	Rsph3	gene		D:\assemblies\Rattus_norvegicus-Rnor_6.0-dbSNP149\Rattus_norvegicus-Rnor_6.0-dbSNP149.genometemplate\sequences\NC_005100_chr1.gbk#0	282763074	NC_005100.4	-	66774	47478924..47412151	361476, 1311306		Rsph3
LOC102553528	0.001	0.001	0.111	0.001	1	1	117.738	1	Z-000454	LOC102553528	gene		D:\assemblies\Rattus_norvegicus-Rnor_6.0-dbSNP149\Rattus_norvegicus-Rnor_6.0-dbSNP149.genometemplate\sequences\NC_005100_chr1.gbk#0	282763074	NC_005100.4	-	2770	47972459..47969690	102553528, 7683242		LOC102553528
Acat2l1	0.363	0.17	5.514	0.711	0.469151	0.239663	7.7588	0.510844	Z-000456	Acat2l1	gene		D:\assemblies\Rattus_norvegicus-Rnor_6.0-dbSNP149\Rattus_norvegicus-Rnor_6.0-dbSNP149.genometemplate\sequences\NC_005100_chr1.gbk#0	282763074	NC_005100.4	+	17157	48008574..48025730	365096, 1562948		Acat2l1
Pacrg	2.854	8.808	0.001	2.751	3.08603	3.20135	0.00034352	1.03737	Z-000475	Pacrg	gene		D:\assemblies\Rattus_norvegicus-Rnor_6.0-dbSNP149\Rattus_norvegicus-Rnor_6.0-dbSNP149.genometemplate\sequences\NC_005100_chr1.gbk#0	282763074	NC_005100.4	+	421051	50070273..50491323	499021, 1561027		Pacrg	RGD1561027
Pde10a	0.025	0.01	0.063	0.001	0.412379	10.9896	67.1571	26.6494	Z-000489	Pde10a	gene		D:\assemblies\Rattus_norvegicus-Rnor_6.0-dbSNP149\Rattus_norvegicus-Rnor_6.0-dbSNP149.genometemplate\sequences\NC_005100_chr1.gbk#0	282763074	NC_005100.4	-	184153	52544448..52360296	63885, 68434		Pde10a	Pde10a3
T	0.001	0.001	0.101	0.001	1	1	106.607	1	Z-000490	T	gene		D:\assemblies\Rattus_norvegicus-Rnor_6.0-dbSNP149\Rattus_norvegicus-Rnor_6.0-dbSNP149.genometemplate\sequences\NC_005100_chr1.gbk#0	282763074	NC_005100.4	-	13625	52900691..52887067	292301, 1310141		T
Rnaset2	14.064	30.625	171.764	17.387	2.17759	1.7614	9.8789	0.808874	Z-000497	Rnaset2	gene		D:\assemblies\Rattus_norvegicus-Rnor_6.0-dbSNP149\Rattus_norvegicus-Rnor_6.0-dbSNP149.genometemplate\sequences\NC_005100_chr1.gbk#0	282763074	NC_005100.4	+	17170	53174879..53192048	292306, 1309918		Rnaset2
LOC108349805	0.364	0.08	9.478	0.264	0.218181	0.300955	35.8725	1.37939	Z-000522	LOC108349805	gene		D:\assemblies\Rattus_norvegicus-Rnor_6.0-dbSNP149\Rattus_norvegicus-Rnor_6.0-dbSNP149.genometemplate\sequences\NC_005100_chr1.gbk#0	282763074	NC_005100.4	-	5223	54426691..54421469	108349805		LOC108349805
LOC678796	0.006	0.01	4.623	0.52	1.70056	0.0194609	8.89287	0.0114438	Z-000523	LOC678796	gene		D:\assemblies\Rattus_norvegicus-Rnor_6.0-dbSNP149\Rattus_norvegicus-Rnor_6.0-dbSNP149.genometemplate\sequences\NC_005100_chr1.gbk#0	282763074	NC_005100.4	-	1022	54456193..54455172	678796, 1596891		LOC678796
RGD1561185	3.001	19.53	0.583	4.948	6.50811	3.94749	0.117877	0.606549	Z-000544	RGD1561185	gene		D:\assemblies\Rattus_norvegicus-Rnor_6.0-dbSNP149\Rattus_norvegicus-Rnor_6.0-dbSNP149.genometemplate\sequences\NC_005100_chr1.gbk#0	282763074	NC_005100.4	-	1126	55663497..55662372	502251, 1561185		RGD1561185
Ermard	1.573	1.33	28.441	1.226	0.845641	1.0852	23.2059	1.28329	Z-000560	Ermard	gene		D:\assemblies\Rattus_norvegicus-Rnor_6.0-dbSNP149\Rattus_norvegicus-Rnor_6.0-dbSNP149.genometemplate\sequences\NC_005100_chr1.gbk#0	282763074	NC_005100.4	+	25335	56982742..57008076	361485, 1309374		Ermard
Pdcd2	7.31	9.823	38.624	9.052	1.34388	1.08524	4.26712	0.807543	Z-000569	Pdcd2	gene		D:\assemblies\Rattus_norvegicus-Rnor_6.0-dbSNP149\Rattus_norvegicus-Rnor_6.0-dbSNP149.genometemplate\sequences\NC_005100_chr1.gbk#0	282763074	NC_005100.4	-	5491	57518458..57512968	58934, 61887		Pdcd2
LOC108349526	0.001	0.001	0.331	0.001	1	1	349.764	1	Z-000573	LOC108349526	gene		D:\assemblies\Rattus_norvegicus-Rnor_6.0-dbSNP149\Rattus_norvegicus-Rnor_6.0-dbSNP149.genometemplate\sequences\NC_005100_chr1.gbk#0	282763074	NC_005100.4	-	10703	57682935..57672233	108349526		LOC108349526
Lix1	0.001	0.001	0.156	0.001	1	1	164.807	1	Z-000577	Lix1	gene		D:\assemblies\Rattus_norvegicus-Rnor_6.0-dbSNP149\Rattus_norvegicus-Rnor_6.0-dbSNP149.genometemplate\sequences\NC_005100_chr1.gbk#0	282763074	NC_005100.4	+	56858	59156021..59212878	292381, 1309454		Lix1
Fpr1	0.007	2.112	0.001	0.408	313.13	5.17682	0.00231693	0.0165325	Z-000591	Fpr1	gene		D:\assemblies\Rattus_norvegicus-Rnor_6.0-dbSNP149\Rattus_norvegicus-Rnor_6.0-dbSNP149.genometemplate\sequences\NC_005100_chr1.gbk#0	282763074	NC_005100.4	+	8234	59759025..59767258	292409, 1310883		Fpr1
LOC102552527	0.402	0.103	5.562	1.189	0.256153	0.0866176	4.67928	0.338149	Z-000620	LOC102552527	gene		D:\assemblies\Rattus_norvegicus-Rnor_6.0-dbSNP149\Rattus_norvegicus-Rnor_6.0-dbSNP149.genometemplate\sequences\NC_005100_chr1.gbk#0	282763074	NC_005100.4	+	20742	61257925..61278666	102552527, 7689541		LOC102552527
LOC102555644	0.805	0.118	1.989	0.363	0.146009	0.323627	5.47556	2.21649	Z-000636	LOC102555644	gene		D:\assemblies\Rattus_norvegicus-Rnor_6.0-dbSNP149\Rattus_norvegicus-Rnor_6.0-dbSNP149.genometemplate\sequences\NC_005100_chr1.gbk#0	282763074	NC_005100.4	-	15372	62119267..62103896	102555644, 7699783		LOC102555644
Lilrc2	1.496	3.081	0.001	0.563	2.05997	5.4725	0.00167858	2.65659	Z-000658	Lilrc2	gene		D:\assemblies\Rattus_norvegicus-Rnor_6.0-dbSNP149\Rattus_norvegicus-Rnor_6.0-dbSNP149.genometemplate\sequences\NC_005100_chr1.gbk#0	282763074	NC_005100.4	-	5038	63684265..63679228	690906, 1589872		Lilrc2
Lilrb3l	2.554	3.372	0.255	2.699	1.32023	1.24955	0.0943984	0.946467	Z-000661	Lilrb3l	gene		D:\assemblies\Rattus_norvegicus-Rnor_6.0-dbSNP149\Rattus_norvegicus-Rnor_6.0-dbSNP149.genometemplate\sequences\NC_005100_chr1.gbk#0	282763074	NC_005100.4	+	89641	63759638..63849278	361493, 1307219		Lilrb3l	Lilrb3, Pir-A1, Pir-A2, Pirb
LOC683420	3.949	8.829	1.308	6.063	2.23596	1.45617	0.215709	0.651252	Z-000662	LOC683420	gene		D:\assemblies\Rattus_norvegicus-Rnor_6.0-dbSNP149\Rattus_norvegicus-Rnor_6.0-dbSNP149.genometemplate\sequences\NC_005100_chr1.gbk#0	282763074	NC_005100.4	+	23170	63813161..63836330	683420, 1586870		LOC683420
Lilrb1	0.484	0.759	0.025	0.398	1.5677	1.90484	0.0618293	1.21506	Z-000663	Lilrb1	gene		D:\assemblies\Rattus_norvegicus-Rnor_6.0-dbSNP149\Rattus_norvegicus-Rnor_6.0-dbSNP149.genometemplate\sequences\NC_005100_chr1.gbk#0	282763074	NC_005100.4	+	8014	63883684..63891697	100912456, 6487069		Lilrb1
LOC690948	0.484	0.759	0.025	0.398	1.5677	1.90484	0.0618293	1.21506	Z-000665	LOC690948	gene		D:\assemblies\Rattus_norvegicus-Rnor_6.0-dbSNP149\Rattus_norvegicus-Rnor_6.0-dbSNP149.genometemplate\sequences\NC_005100_chr1.gbk#0	282763074	NC_005100.4	+	8015	63963855..63971869	690948, 1589833		LOC690948
LOC103689992	180.977	497.441	1010.87	243.188	2.74865	2.0455	4.15674	0.744186	Z-000667	LOC103689992	gene		D:\assemblies\Rattus_norvegicus-Rnor_6.0-dbSNP149\Rattus_norvegicus-Rnor_6.0-dbSNP149.genometemplate\sequences\NC_005100_chr1.gbk#0	282763074	NC_005100.4	-	3399	64021723..64018325	103689992, 9089855		LOC103689992
Rps9	180.977	497.441	1010.87	243.188	2.74865	2.0455	4.15674	0.744186	Z-000672	Rps9	gene		D:\assemblies\Rattus_norvegicus-Rnor_6.0-dbSNP149\Rattus_norvegicus-Rnor_6.0-dbSNP149.genometemplate\sequences\NC_005100_chr1.gbk#0	282763074	NC_005100.4	-	3399	64090023..64086625	81772, 619889		Rps9
Tmc4	0.001	0.001	0.219	0.001	1	1	231.936	1	Z-000675	Tmc4	gene		D:\assemblies\Rattus_norvegicus-Rnor_6.0-dbSNP149\Rattus_norvegicus-Rnor_6.0-dbSNP149.genometemplate\sequences\NC_005100_chr1.gbk#0	282763074	NC_005100.4	+	11890	64114687..64126576	308310, 1304811		Tmc4
Olr1l	0.048	0.965	0.001	0.322	20.1451	2.99451	0.00293316	0.148647	Z-000693	Olr1l	gene		D:\assemblies\Rattus_norvegicus-Rnor_6.0-dbSNP149\Rattus_norvegicus-Rnor_6.0-dbSNP149.genometemplate\sequences\NC_005100_chr1.gbk#0	282763074	NC_005100.4	+	975	64480929..64481903	365170, 1333287		Olr1l	Olr1
LOC103691004	0.101	0.318	1.142	0.076	3.14948	4.15085	14.9281	1.31795	Z-000708	LOC103691004	gene		D:\assemblies\Rattus_norvegicus-Rnor_6.0-dbSNP149\Rattus_norvegicus-Rnor_6.0-dbSNP149.genometemplate\sequences\NC_005100_chr1.gbk#0	282763074	NC_005100.4	-	16506	64833975..64817470	103691004, 9177281		LOC103691004
Vom2r13	0.003	0.007	0.033	0.001	1.99127	7.30722	34.4047	3.66964	Z-000710	Vom2r13	gene		D:\assemblies\Rattus_norvegicus-Rnor_6.0-dbSNP149\Rattus_norvegicus-Rnor_6.0-dbSNP149.genometemplate\sequences\NC_005100_chr1.gbk#0	282763074	NC_005100.4	+	47454	64928503..64975956	690593, 1594671		Vom2r13
LOC102552250	0.064	0.011	0.969	0.11	0.171892	0.0995185	8.83292	0.578959	Z-000728	LOC102552250	gene		D:\assemblies\Rattus_norvegicus-Rnor_6.0-dbSNP149\Rattus_norvegicus-Rnor_6.0-dbSNP149.genometemplate\sequences\NC_005100_chr1.gbk#0	282763074	NC_005100.4	+	2071	65602266..65604336	102552250, 7591865		LOC102552250
LOC103690016	1.399	1.24	0.162	0.842	0.88613	1.47239	0.191993	1.66159	Z-000766	LOC103690016	gene		D:\assemblies\Rattus_norvegicus-Rnor_6.0-dbSNP149\Rattus_norvegicus-Rnor_6.0-dbSNP149.genometemplate\sequences\NC_005100_chr1.gbk#0	282763074	NC_005100.4	-	21898	67390261..67368364	103690016, 9439246		LOC103690016
Peg3	1.973	3.192	0.172	3.806	1.61768	0.838526	0.0452562	0.518351	Z-000806	Peg3	gene		D:\assemblies\Rattus_norvegicus-Rnor_6.0-dbSNP149\Rattus_norvegicus-Rnor_6.0-dbSNP149.genometemplate\sequences\NC_005100_chr1.gbk#0	282763074	NC_005100.4	+	26641	70210810..70237450	103691034, 2323590		Peg3
Apeg3	3.939	7.612	0.225	4.315	1.93239	1.76395	0.0521987	0.912834	Z-000807	Apeg3	gene		D:\assemblies\Rattus_norvegicus-Rnor_6.0-dbSNP149\Rattus_norvegicus-Rnor_6.0-dbSNP149.genometemplate\sequences\NC_005100_chr1.gbk#0	282763074	NC_005100.4	-	932	70235091..70234160	619476, 1563921		Apeg3
Nat14	0.035	0.156	0.001	0.601	4.44378	0.258692	0.00157206	0.0582145	Z-000860	Nat14	gene		D:\assemblies\Rattus_norvegicus-Rnor_6.0-dbSNP149\Rattus_norvegicus-Rnor_6.0-dbSNP149.genometemplate\sequences\NC_005100_chr1.gbk#0	282763074	NC_005100.4	-	2897	72465299..72462403	361500, 1565991		Nat14	RGD1565991, Zfp628
Rpl28	523.685	1253.32	5545.75	649.889	2.39326	1.92851	8.53338	0.805808	Z-000868	Rpl28	gene		D:\assemblies\Rattus_norvegicus-Rnor_6.0-dbSNP149\Rattus_norvegicus-Rnor_6.0-dbSNP149.genometemplate\sequences\NC_005100_chr1.gbk#0	282763074	NC_005100.4	-	2660	72621941..72619282	64638, 621193		Rpl28
Ptprh	1.254	1.03	0.001	1.194	0.821445	0.862804	0.000791602	1.05035	Z-000882	Ptprh	gene		D:\assemblies\Rattus_norvegicus-Rnor_6.0-dbSNP149\Rattus_norvegicus-Rnor_6.0-dbSNP149.genometemplate\sequences\NC_005100_chr1.gbk#0	282763074	NC_005100.4	+	49227	72809935..72859161	171125, 620553		Ptprh	Bem2
Tnnt1	5.2	8.345	1.099	8.68	1.60499	0.961455	0.126668	0.599041	Z-000887	Tnnt1	gene		D:\assemblies\Rattus_norvegicus-Rnor_6.0-dbSNP149\Rattus_norvegicus-Rnor_6.0-dbSNP149.genometemplate\sequences\NC_005100_chr1.gbk#0	282763074	NC_005100.4	+	10360	72889270..72899629	171409, 621852		Tnnt1	Fang2, sTnT, tnTs
Lilrb4	0.889	0.141	14.19	0.634	0.159207	0.223215	22.3889	1.40204	Z-000896	Lilrb4	gene		D:\assemblies\Rattus_norvegicus-Rnor_6.0-dbSNP149\Rattus_norvegicus-Rnor_6.0-dbSNP149.genometemplate\sequences\NC_005100_chr1.gbk#0	282763074	NC_005100.4	-	5595	73399448..73393854	292594, 1359090		Lilrb4	Gp49b, GP49B2
Lilra5	4.215	7.998	0.456	7.295	1.8974	1.09639	0.0625586	0.577836	Z-000898	Lilra5	gene		D:\assemblies\Rattus_norvegicus-Rnor_6.0-dbSNP149\Rattus_norvegicus-Rnor_6.0-dbSNP149.genometemplate\sequences\NC_005100_chr1.gbk#0	282763074	NC_005100.4	-	26466	73682232..73655767	691533, 1582781		Lilra5	Lilrc1
LOC100911727	0.22	0.941	1.939	0.29	4.27565	3.24148	6.67987	0.758125	Z-000915	LOC100911727	gene		D:\assemblies\Rattus_norvegicus-Rnor_6.0-dbSNP149\Rattus_norvegicus-Rnor_6.0-dbSNP149.genometemplate\sequences\NC_005100_chr1.gbk#0	282763074	NC_005100.4	+	40299	75224143..75264441	100911727, 6491367		LOC100911727
LOC103690015	33.603	149.021	2602.14	42.473	4.43482	3.50863	61.266	0.791155	Z-000940	LOC103690015	gene		D:\assemblies\Rattus_norvegicus-Rnor_6.0-dbSNP149\Rattus_norvegicus-Rnor_6.0-dbSNP149.genometemplate\sequences\NC_005100_chr1.gbk#0	282763074	NC_005100.4	+	484	77541352..77541835	103690015, 9313957		LOC103690015
Ehd2	16.28	25.98	1.78	17.453	1.59588	1.48859	0.101988	0.932774	Z-000947	Ehd2	gene		D:\assemblies\Rattus_norvegicus-Rnor_6.0-dbSNP149\Rattus_norvegicus-Rnor_6.0-dbSNP149.genometemplate\sequences\NC_005100_chr1.gbk#0	282763074	NC_005100.4	-	18272	77865870..77847599	361512, 1560856		Ehd2	MGEPS
Zfp541	0.001	0.004	0.049	0.001	4.04501	4.04501	51.6644	1	Z-000950	Zfp541	gene		D:\assemblies\Rattus_norvegicus-Rnor_6.0-dbSNP149\Rattus_norvegicus-Rnor_6.0-dbSNP149.genometemplate\sequences\NC_005100_chr1.gbk#0	282763074	NC_005100.4	+	36629	77957188..77993816	308108, 1310756		Zfp541
Inafm1	5.85	16.898	36.525	6.429	2.8884	2.62814	5.68091	0.909897	Z-000958	Inafm1	gene		D:\assemblies\Rattus_norvegicus-Rnor_6.0-dbSNP149\Rattus_norvegicus-Rnor_6.0-dbSNP149.genometemplate\sequences\NC_005100_chr1.gbk#0	282763074	NC_005100.4	-	1485	78212350..78210866	100192314, 2301983		Inafm1	Prr24
Arhgap35	1.04	1.427	0.33	1.575	1.37219	0.905549	0.209207	0.659931	Z-000966	Arhgap35	gene		D:\assemblies\Rattus_norvegicus-Rnor_6.0-dbSNP149\Rattus_norvegicus-Rnor_6.0-dbSNP149.genometemplate\sequences\NC_005100_chr1.gbk#0	282763074	NC_005100.4	-	116966	78573374..78456409	306400, 1308738		Arhgap35	Grlf1, p190RhoGAP
Pglyrp1	14.199	36.937	3.502	15.802	2.60136	2.33752	0.221616	0.898574	Z-000997	Pglyrp1	gene		D:\assemblies\Rattus_norvegicus-Rnor_6.0-dbSNP149\Rattus_norvegicus-Rnor_6.0-dbSNP149.genometemplate\sequences\NC_005100_chr1.gbk#0	282763074	NC_005100.4	+	5186	79790879..79796064	84387, 621429		Pglyrp1	Pglyrp, Pgrp
Sympk	2.986	6.982	23.436	5.332	2.33843	1.30944	4.39524	0.559966	Z-001004	Sympk	gene		D:\assemblies\Rattus_norvegicus-Rnor_6.0-dbSNP149\Rattus_norvegicus-Rnor_6.0-dbSNP149.genometemplate\sequences\NC_005100_chr1.gbk#0	282763074	NC_005100.4	+	28365	79931097..79959461	292683, 1306735		Sympk	Hfn3g
Fbxo46	1.159	2.034	0.301	1.646	1.75556	1.23622	0.182778	0.704175	Z-001011	Fbxo46	gene		D:\assemblies\Rattus_norvegicus-Rnor_6.0-dbSNP149\Rattus_norvegicus-Rnor_6.0-dbSNP149.genometemplate\sequences\NC_005100_chr1.gbk#0	282763074	NC_005100.4	+	16794	80028873..80045666	292686, 1308393		Fbxo46
Snrpd2	88.681	268.485	493.721	97.929	3.02754	2.74162	5.04161	0.905559	Z-001013	Snrpd2	gene		D:\assemblies\Rattus_norvegicus-Rnor_6.0-dbSNP149\Rattus_norvegicus-Rnor_6.0-dbSNP149.genometemplate\sequences\NC_005100_chr1.gbk#0	282763074	NC_005100.4	+	2851	80057140..80059990	680309, 1593018		Snrpd2
Zfp296	0.175	0.006	3.287	0.413	0.0333229	0.0141248	7.95318	0.423878	Z-001041	Zfp296	gene		D:\assemblies\Rattus_norvegicus-Rnor_6.0-dbSNP149\Rattus_norvegicus-Rnor_6.0-dbSNP149.genometemplate\sequences\NC_005100_chr1.gbk#0	282763074	NC_005100.4	+	4230	80487193..80491422	365511, 1595818		Zfp296
Clasrp	2.462	3.608	75.303	3.142	1.46571	1.14846	23.969	0.783551	Z-001042	Clasrp	gene		D:\assemblies\Rattus_norvegicus-Rnor_6.0-dbSNP149\Rattus_norvegicus-Rnor_6.0-dbSNP149.genometemplate\sequences\NC_005100_chr1.gbk#0	282763074	NC_005100.4	-	24242	80515761..80491520	499390, 1563538		Clasrp	Sfrs16, Srsf16
Apoc1	0.012	0.125	1.694	0.001	10.674	132.127	1792.22	12.3784	Z-001049	Apoc1	gene		D:\assemblies\Rattus_norvegicus-Rnor_6.0-dbSNP149\Rattus_norvegicus-Rnor_6.0-dbSNP149.genometemplate\sequences\NC_005100_chr1.gbk#0	282763074	NC_005100.4	-	3321	80609954..80606634	108348160		Apoc1
Apoe	94.875	100.097	659.721	90.647	1.05504	1.10425	7.27788	1.04664	Z-001050	Apoe	gene		D:\assemblies\Rattus_norvegicus-Rnor_6.0-dbSNP149\Rattus_norvegicus-Rnor_6.0-dbSNP149.genometemplate\sequences\NC_005100_chr1.gbk#0	282763074	NC_005100.4	-	3927	80616820..80612894	25728, 2138		Apoe	APOEA
Cblc	0.001	0.001	0.112	0.001	1	1	117.998	1	Z-001054	Cblc	gene		D:\assemblies\Rattus_norvegicus-Rnor_6.0-dbSNP149\Rattus_norvegicus-Rnor_6.0-dbSNP149.genometemplate\sequences\NC_005100_chr1.gbk#0	282763074	NC_005100.4	-	16826	80716146..80699321	292699, 1307651		Cblc
LOC108349553	0.001	0.001	0.491	0.001	1	1	519.743	1	Z-001060	LOC108349553	gene		D:\assemblies\Rattus_norvegicus-Rnor_6.0-dbSNP149\Rattus_norvegicus-Rnor_6.0-dbSNP149.genometemplate\sequences\NC_005100_chr1.gbk#0	282763074	NC_005100.4	+	2021	80851216..80853236	108349553		LOC108349553
Zfp180	3.631	5.218	0.982	3.973	1.43704	1.31318	0.247072	0.913809	Z-001063	Zfp180	gene		D:\assemblies\Rattus_norvegicus-Rnor_6.0-dbSNP149\Rattus_norvegicus-Rnor_6.0-dbSNP149.genometemplate\sequences\NC_005100_chr1.gbk#0	282763074	NC_005100.4	+	19294	80920745..80940038	246279, 631380		Zfp180	rKr1
Kcnn4	8.631	12.533	45.436	9.341	1.45216	1.34171	4.86392	0.923944	Z-001077	Kcnn4	gene		D:\assemblies\Rattus_norvegicus-Rnor_6.0-dbSNP149\Rattus_norvegicus-Rnor_6.0-dbSNP149.genometemplate\sequences\NC_005100_chr1.gbk#0	282763074	NC_005100.4	+	18132	81227855..81245986	65206, 621476		Kcnn4	KCa3.1, rKCNN4c, rSK4
Cadm4	0.007	0.007	0.001	0.183	1.08806	0.0396686	0.00516927	0.0364581	Z-001081	Cadm4	gene		D:\assemblies\Rattus_norvegicus-Rnor_6.0-dbSNP149\Rattus_norvegicus-Rnor_6.0-dbSNP149.genometemplate\sequences\NC_005100_chr1.gbk#0	282763074	NC_005100.4	+	4642	81365200..81369841	365216, 1304722		Cadm4	Igsf4c, Necl-4, Upar
Irgq	0.364	1.487	0.196	0.845	4.08514	1.75999	0.23261	0.430828	Z-001084	Irgq	gene		D:\assemblies\Rattus_norvegicus-Rnor_6.0-dbSNP149\Rattus_norvegicus-Rnor_6.0-dbSNP149.genometemplate\sequences\NC_005100_chr1.gbk#0	282763074	NC_005100.4	+	7951	81395922..81403872	292708, 1309409		Irgq	RGD1309409
LOC100910611	0.001	0.001	0.03	0.001	1	1	31.8717	1	Z-001095	LOC100910611	gene		D:\assemblies\Rattus_norvegicus-Rnor_6.0-dbSNP149\Rattus_norvegicus-Rnor_6.0-dbSNP149.genometemplate\sequences\NC_005100_chr1.gbk#0	282763074	NC_005100.4	+	19859	81564683..81584541	100910611, 6497684		LOC100910611
Rps19	283.963	578.661	1607.5	344.318	2.0378	1.6806	4.66865	0.824713	Z-001104	Rps19	gene		D:\assemblies\Rattus_norvegicus-Rnor_6.0-dbSNP149\Rattus_norvegicus-Rnor_6.0-dbSNP149.genometemplate\sequences\NC_005100_chr1.gbk#0	282763074	NC_005100.4	+	5757	81750873..81756629	108348115		Rps19
Rps19	141.982	289.33	803.749	172.159	2.0378	1.6806	4.66865	0.824713	Z-001105	Rps19 [2]	gene		D:\assemblies\Rattus_norvegicus-Rnor_6.0-dbSNP149\Rattus_norvegicus-Rnor_6.0-dbSNP149.genometemplate\sequences\NC_005108_chr9.gbk#0	122095297	NC_005108.4	-	5703	16807982..16802280	29287, 68440		Rps19
Cd79a	10.308	9.85	225.09	6.454	0.955581	1.52613	34.8755	1.59707	Z-001106	Cd79a	gene		D:\assemblies\Rattus_norvegicus-Rnor_6.0-dbSNP149\Rattus_norvegicus-Rnor_6.0-dbSNP149.genometemplate\sequences\NC_005100_chr1.gbk#0	282763074	NC_005100.4	+	4431	81763609..81768039	100913063, 6484896		Cd79a
Arhgef1	13.726	20.941	189.991	16.936	1.52557	1.23643	11.2179	0.81047	Z-001107	Arhgef1	gene		D:\assemblies\Rattus_norvegicus-Rnor_6.0-dbSNP149\Rattus_norvegicus-Rnor_6.0-dbSNP149.genometemplate\sequences\NC_005100_chr1.gbk#0	282763074	NC_005100.4	+	28026	81769212..81797237	60323, 620951		Arhgef1	Lsc
Rabac1	13.476	27.027	83.892	12.454	2.00565	2.1701	6.73591	1.082	Z-001109	Rabac1	gene		D:\assemblies\Rattus_norvegicus-Rnor_6.0-dbSNP149\Rattus_norvegicus-Rnor_6.0-dbSNP149.genometemplate\sequences\NC_005100_chr1.gbk#0	282763074	NC_005100.4	-	3099	81846765..81843667	83583, 621002		Rabac1	Pra1
LOC103691054	0.051	0.857	6.388	0.82	16.9352	1.04594	7.7946	0.0617617	Z-001114	LOC103691054	gene		D:\assemblies\Rattus_norvegicus-Rnor_6.0-dbSNP149\Rattus_norvegicus-Rnor_6.0-dbSNP149.genometemplate\sequences\NC_005100_chr1.gbk#0	282763074	NC_005100.4	+	22735	82003806..82026540	103691054, 9072276		LOC103691054
Pafah1b3	1.673	5.446	14.882	2.457	3.25454	2.21665	6.05733	0.681094	Z-001120	Pafah1b3	gene		D:\assemblies\Rattus_norvegicus-Rnor_6.0-dbSNP149\Rattus_norvegicus-Rnor_6.0-dbSNP149.genometemplate\sequences\NC_005100_chr1.gbk#0	282763074	NC_005100.4	-	2527	82166259..82163733	114113, 620333		Pafah1b3
Megf8	0.719	0.303	0.153	0.717	0.422025	0.423185	0.212813	1.00275	Z-001123	Megf8	gene		D:\assemblies\Rattus_norvegicus-Rnor_6.0-dbSNP149\Rattus_norvegicus-Rnor_6.0-dbSNP149.genometemplate\sequences\NC_005100_chr1.gbk#0	282763074	NC_005100.4	+	49375	82184671..82234045	114029, 621190		Megf8	Egfl4
Axl	10.051	8.137	1.503	11.711	0.809522	0.694785	0.128345	0.858266	Z-001140	Axl	gene		D:\assemblies\Rattus_norvegicus-Rnor_6.0-dbSNP149\Rattus_norvegicus-Rnor_6.0-dbSNP149.genometemplate\sequences\NC_005100_chr1.gbk#0	282763074	NC_005100.4	-	29870	82580761..82550892	308444, 620028		Axl
LOC100359930	0.001	0.001	0.558	0.001	1	1	590.262	1	Z-001142	LOC100359930	gene		D:\assemblies\Rattus_norvegicus-Rnor_6.0-dbSNP149\Rattus_norvegicus-Rnor_6.0-dbSNP149.genometemplate\sequences\NC_005100_chr1.gbk#0	282763074	NC_005100.4	-	1646	82653657..82652012	100359930, 2323115		LOC100359930
LOC100910953	0.001	0.001	0.184	0.001	1	1	194.374	1	Z-001143	LOC100910953	gene		D:\assemblies\Rattus_norvegicus-Rnor_6.0-dbSNP149\Rattus_norvegicus-Rnor_6.0-dbSNP149.genometemplate\sequences\NC_005100_chr1.gbk#0	282763074	NC_005100.4	+	4779	82815709..82820487	100910953, 6495491		LOC100910953
LOC681077	0.001	0.001	0.372	0.001	1	1	393.784	1	Z-001146	LOC681077	gene		D:\assemblies\Rattus_norvegicus-Rnor_6.0-dbSNP149\Rattus_norvegicus-Rnor_6.0-dbSNP149.genometemplate\sequences\NC_005100_chr1.gbk#0	282763074	NC_005100.4	+	15209	82922429..82937637	681077, 1584667		LOC681077
Cd177	1.824	3.299	0.002	2.205	1.80825	1.49622	0.00111493	0.827441	Z-001148	Cd177	gene		D:\assemblies\Rattus_norvegicus-Rnor_6.0-dbSNP149\Rattus_norvegicus-Rnor_6.0-dbSNP149.genometemplate\sequences\NC_005100_chr1.gbk#0	282763074	NC_005100.4	-	22624	82987306..82964683	499099, 1562941		Cd177	RGD1562941
Mia	0.093	0.001	10.582	0.001	0.0101575	1	11196.7	98.449	Z-001169	Mia	gene		D:\assemblies\Rattus_norvegicus-Rnor_6.0-dbSNP149\Rattus_norvegicus-Rnor_6.0-dbSNP149.genometemplate\sequences\NC_005100_chr1.gbk#0	282763074	NC_005100.4	-	1694	83993270..83991577	81510, 620883		Mia	Cdrap, Mia1
Ltbp4	1.067	1.361	5.288	1.102	1.27551	1.23522	4.79766	0.968416	Z-001175	Ltbp4	gene		D:\assemblies\Rattus_norvegicus-Rnor_6.0-dbSNP149\Rattus_norvegicus-Rnor_6.0-dbSNP149.genometemplate\sequences\NC_005100_chr1.gbk#0	282763074	NC_005100.4	-	34050	84152095..84118046	292734, 1307033		Ltbp4
Blvrb	69.805	156.693	15.172	94.496	2.24473	1.6582	0.160562	0.73871	Z-001178	Blvrb	gene		D:\assemblies\Rattus_norvegicus-Rnor_6.0-dbSNP149\Rattus_norvegicus-Rnor_6.0-dbSNP149.genometemplate\sequences\NC_005100_chr1.gbk#0	282763074	NC_005100.4	+	17664	84256063..84273726	292737, 1306080		Blvrb
Fbl	14.754	39.422	87.427	21.021	2.67202	1.87535	4.15894	0.701846	Z-001205	Fbl	gene		D:\assemblies\Rattus_norvegicus-Rnor_6.0-dbSNP149\Rattus_norvegicus-Rnor_6.0-dbSNP149.genometemplate\sequences\NC_005100_chr1.gbk#0	282763074	NC_005100.4	+	9101	85103519..85112619	292747, 1305542		Fbl
Acp7	0.001	0.001	0.157	0.001	1	1	165.631	1	Z-001207	Acp7	gene		D:\assemblies\Rattus_norvegicus-Rnor_6.0-dbSNP149\Rattus_norvegicus-Rnor_6.0-dbSNP149.genometemplate\sequences\NC_005100_chr1.gbk#0	282763074	NC_005100.4	+	21067	85141383..85162449	687403, 1585399		Acp7
Pak4	3.524	2.574	0.514	5.401	0.730375	0.476497	0.095089	0.652401	Z-001208	Pak4	gene		D:\assemblies\Rattus_norvegicus-Rnor_6.0-dbSNP149\Rattus_norvegicus-Rnor_6.0-dbSNP149.genometemplate\sequences\NC_005100_chr1.gbk#0	282763074	NC_005100.4	+	39285	85162462..85201746	292756, 1307705		Pak4
Gmfg	96.316	256.57	869.501	127.396	2.66382	2.01397	6.82521	0.756043	Z-001215	Gmfg	gene		D:\assemblies\Rattus_norvegicus-Rnor_6.0-dbSNP149\Rattus_norvegicus-Rnor_6.0-dbSNP149.genometemplate\sequences\NC_005100_chr1.gbk#0	282763074	NC_005100.4	-	10388	85322860..85312473	113940, 620506		Gmfg
Dll3	0.001	0.071	0.001	0.182	75.2266	0.390709	0.00519375	0.00519375	Z-001228	Dll3	gene		D:\assemblies\Rattus_norvegicus-Rnor_6.0-dbSNP149\Rattus_norvegicus-Rnor_6.0-dbSNP149.genometemplate\sequences\NC_005100_chr1.gbk#0	282763074	NC_005100.4	+	7809	85485875..85493683	114125, 70953		Dll3
Ccer2	0.009	0.052	1.995	0.273	5.76126	0.192442	7.31589	0.0334028	Z-001251	Ccer2	gene		D:\assemblies\Rattus_norvegicus-Rnor_6.0-dbSNP149\Rattus_norvegicus-Rnor_6.0-dbSNP149.genometemplate\sequences\NC_005100_chr1.gbk#0	282763074	NC_005100.4	+	3604	86936391..86939994	100909701, 6502457		Ccer2
Rinl	0.395	1.93	8.944	1.021	4.88279	1.89028	8.75814	0.387132	Z-001254	Rinl	gene		D:\assemblies\Rattus_norvegicus-Rnor_6.0-dbSNP149\Rattus_norvegicus-Rnor_6.0-dbSNP149.genometemplate\sequences\NC_005100_chr1.gbk#0	282763074	NC_005100.4	+	11310	86971997..86983306	292760, 1310133		Rinl	RGD1310133
LOC102550585	0.016	0.004	0.045	0.001	0.27339	4.62582	47.236	16.9202	Z-001262	LOC102550585	gene		D:\assemblies\Rattus_norvegicus-Rnor_6.0-dbSNP149\Rattus_norvegicus-Rnor_6.0-dbSNP149.genometemplate\sequences\NC_005100_chr1.gbk#0	282763074	NC_005100.4	-	11809	87160644..87148836	102550585, 7706385		LOC102550585
Spint2	6.619	14.248	53.477	6.368	2.15282	2.23755	8.39786	1.03936	Z-001266	Spint2	gene		D:\assemblies\Rattus_norvegicus-Rnor_6.0-dbSNP149\Rattus_norvegicus-Rnor_6.0-dbSNP149.genometemplate\sequences\NC_005100_chr1.gbk#0	282763074	NC_005100.4	-	22454	87221826..87199373	292770, 735123		Spint2	HAI-2, Pb
Eif3k	41.92	106.828	290.934	55.071	2.54837	1.93983	5.28292	0.761204	Z-001283	Eif3k	gene		D:\assemblies\Rattus_norvegicus-Rnor_6.0-dbSNP149\Rattus_norvegicus-Rnor_6.0-dbSNP149.genometemplate\sequences\NC_005100_chr1.gbk#0	282763074	NC_005100.4	-	9892	87937033..87927142	292762, 1309221		Eif3k	Eif3s12, PLAC-24
Map4k1	4.956	10.284	90.764	5.14	2.07531	2.00083	17.6582	0.964112	Z-001284	Map4k1	gene		D:\assemblies\Rattus_norvegicus-Rnor_6.0-dbSNP149\Rattus_norvegicus-Rnor_6.0-dbSNP149.genometemplate\sequences\NC_005100_chr1.gbk#0	282763074	NC_005100.4	+	22389	87937126..87959514	292763, 1305463		Map4k1	Hpk1
Ryr1	0.007	0.191	0.777	0.049	26.9967	3.87118	15.7189	0.143395	Z-001285	Ryr1	gene		D:\assemblies\Rattus_norvegicus-Rnor_6.0-dbSNP149\Rattus_norvegicus-Rnor_6.0-dbSNP149.genometemplate\sequences\NC_005100_chr1.gbk#0	282763074	NC_005100.4	-	106657	88066252..87959596	114207, 1586637		Ryr1
Rasgrp4	2.738	4.445	0.432	3.304	1.62328	1.34517	0.130794	0.828675	Z-001286	Rasgrp4	gene		D:\assemblies\Rattus_norvegicus-Rnor_6.0-dbSNP149\Rattus_norvegicus-Rnor_6.0-dbSNP149.genometemplate\sequences\NC_005100_chr1.gbk#0	282763074	NC_005100.4	+	15982	88078350..88094331	170668, 620476		Rasgrp4
Fam98c	5.131	14.437	74.996	8.126	2.81367	1.77675	9.22942	0.631469	Z-001287	Fam98c	gene		D:\assemblies\Rattus_norvegicus-Rnor_6.0-dbSNP149\Rattus_norvegicus-Rnor_6.0-dbSNP149.genometemplate\sequences\NC_005100_chr1.gbk#0	282763074	NC_005100.4	-	3589	88098828..88095240	292764, 1303117		Fam98c	RGD1303117
Catsperg1	0.293	0.945	6.886	0.276	3.22881	3.42772	24.9716	1.0616	Z-001291	Catsperg1	gene		D:\assemblies\Rattus_norvegicus-Rnor_6.0-dbSNP149\Rattus_norvegicus-Rnor_6.0-dbSNP149.genometemplate\sequences\NC_005100_chr1.gbk#0	282763074	NC_005100.4	-	31328	88162609..88131282	292767, 1310942		Catsperg1	Catsperg, RGD1310942
LOC108349558	0.041	0.716	0.495	0.001	17.4331	757.356	523.545	43.4436	Z-001309	LOC108349558	gene		D:\assemblies\Rattus_norvegicus-Rnor_6.0-dbSNP149\Rattus_norvegicus-Rnor_6.0-dbSNP149.genometemplate\sequences\NC_005100_chr1.gbk#0	282763074	NC_005100.4	+	4305	88631683..88635987	108349558		LOC108349558
LOC100912425	0.005	0.001	0.553	0.001	0.208407	1	585.009	4.7983	Z-001313	LOC100912425	gene		D:\assemblies\Rattus_norvegicus-Rnor_6.0-dbSNP149\Rattus_norvegicus-Rnor_6.0-dbSNP149.genometemplate\sequences\NC_005100_chr1.gbk#0	282763074	NC_005100.4	-	3848	88692125..88688278	100912425, 6486906		LOC100912425
Alkbh6	0.142	3.471	12.269	2.645	24.4983	1.31229	4.63821	0.0535668	Z-001318	Alkbh6	gene		D:\assemblies\Rattus_norvegicus-Rnor_6.0-dbSNP149\Rattus_norvegicus-Rnor_6.0-dbSNP149.genometemplate\sequences\NC_005100_chr1.gbk#0	282763074	NC_005100.4	+	5372	88766872..88772243	292780, 1566318		Alkbh6
Hcst	3.657	5.797	65.973	7.677	1.58515	0.755095	8.59306	0.476355	Z-001324	Hcst	gene		D:\assemblies\Rattus_norvegicus-Rnor_6.0-dbSNP149\Rattus_norvegicus-Rnor_6.0-dbSNP149.genometemplate\sequences\NC_005100_chr1.gbk#0	282763074	NC_005100.4	-	2229	88881653..88879425	474146, 1359238		Hcst	Dap10
Aplp1	0.262	0.056	2.219	0.414	0.212931	0.134884	5.35796	0.633464	Z-001326	Aplp1	gene		D:\assemblies\Rattus_norvegicus-Rnor_6.0-dbSNP149\Rattus_norvegicus-Rnor_6.0-dbSNP149.genometemplate\sequences\NC_005100_chr1.gbk#0	282763074	NC_005100.4	-	11226	88908750..88897525	502317, 69257		Aplp1	Aplp1_retired, RGD1561211
Nphs1	0.001	0.001	2.04	0.001	1	1	2158.32	1	Z-001328	Nphs1	gene		D:\assemblies\Rattus_norvegicus-Rnor_6.0-dbSNP149\Rattus_norvegicus-Rnor_6.0-dbSNP149.genometemplate\sequences\NC_005100_chr1.gbk#0	282763074	NC_005100.4	+	28215	88922346..88950560	64563, 620460		Nphs1
Lin37	5.141	4.742	44.367	5.772	0.922279	0.82149	7.68655	0.890717	Z-001334	Lin37	gene		D:\assemblies\Rattus_norvegicus-Rnor_6.0-dbSNP149\Rattus_norvegicus-Rnor_6.0-dbSNP149.genometemplate\sequences\NC_005100_chr1.gbk#0	282763074	NC_005100.4	-	4228	89014481..89010254	292787, 1308901		Lin37	RGD1308901
Psenen	23.393	66.025	133.7	31.631	2.82246	2.08738	4.2269	0.739561	Z-001335	Psenen	gene		D:\assemblies\Rattus_norvegicus-Rnor_6.0-dbSNP149\Rattus_norvegicus-Rnor_6.0-dbSNP149.genometemplate\sequences\NC_005100_chr1.gbk#0	282763074	NC_005100.4	-	1357	89017449..89016093	292788, 1312037		Psenen	RGD1312037
Upk1a	0.001	0.059	0.207	0.001	62.1617	62.1617	219.482	1	Z-001341	Upk1a	gene		D:\assemblies\Rattus_norvegicus-Rnor_6.0-dbSNP149\Rattus_norvegicus-Rnor_6.0-dbSNP149.genometemplate\sequences\NC_005100_chr1.gbk#0	282763074	NC_005100.4	-	10999	89071579..89060581	365227, 1309849		Upk1a
Haus5	1.078	2.19	13.633	1.996	2.03035	1.09692	6.82948	0.540262	Z-001345	Haus5	gene		D:\assemblies\Rattus_norvegicus-Rnor_6.0-dbSNP149\Rattus_norvegicus-Rnor_6.0-dbSNP149.genometemplate\sequences\NC_005100_chr1.gbk#0	282763074	NC_005100.4	-	11927	89124971..89113045	100362495, 2318093		Haus5
Cd22	0.566	0.506	12.051	1.118	0.893698	0.452648	10.7768	0.506488	Z-001359	Cd22	gene		D:\assemblies\Rattus_norvegicus-Rnor_6.0-dbSNP149\Rattus_norvegicus-Rnor_6.0-dbSNP149.genometemplate\sequences\NC_005100_chr1.gbk#0	282763074	NC_005100.4	-	16428	89329902..89313475	308501, 1311610		Cd22
Hamp	0.001	0.001	5.673	0.001	1	1	6002.37	1	Z-001363	Hamp	gene		D:\assemblies\Rattus_norvegicus-Rnor_6.0-dbSNP149\Rattus_norvegicus-Rnor_6.0-dbSNP149.genometemplate\sequences\NC_005100_chr1.gbk#0	282763074	NC_005100.4	-	1940	89369960..89368021	84604, 70971		Hamp	Hepc
Fam187b	0.001	0.034	0.079	0.001	36.4262	36.4262	83.1876	1	Z-001367	Fam187b	gene		D:\assemblies\Rattus_norvegicus-Rnor_6.0-dbSNP149\Rattus_norvegicus-Rnor_6.0-dbSNP149.genometemplate\sequences\NC_005100_chr1.gbk#0	282763074	NC_005100.4	+	7912	89408718..89416629	689048, 1597448		Fam187b
Fxyd5	15.567	29.601	246.402	12.159	1.9016	2.43443	20.2643	1.2802	Z-001368	Fxyd5	gene		D:\assemblies\Rattus_norvegicus-Rnor_6.0-dbSNP149\Rattus_norvegicus-Rnor_6.0-dbSNP149.genometemplate\sequences\NC_005100_chr1.gbk#0	282763074	NC_005100.4	-	9598	89474450..89464853	60338, 620827		Fxyd5	RIC
Fxyd7	0.001	0.001	0.785	0.001	1	1	830.457	1	Z-001369	Fxyd7	gene		D:\assemblies\Rattus_norvegicus-Rnor_6.0-dbSNP149\Rattus_norvegicus-Rnor_6.0-dbSNP149.genometemplate\sequences\NC_005100_chr1.gbk#0	282763074	NC_005100.4	-	9469	89484069..89474601	63848, 620830		Fxyd7
Gramd1a	2.419	2.316	66.349	2.779	0.957719	0.833497	23.8736	0.870294	Z-001375	Gramd1a	gene		D:\assemblies\Rattus_norvegicus-Rnor_6.0-dbSNP149\Rattus_norvegicus-Rnor_6.0-dbSNP149.genometemplate\sequences\NC_005100_chr1.gbk#0	282763074	NC_005100.4	-	26425	89590406..89563982	361550, 1311022		Gramd1a	Eg1rvc, RGD1311022
Wtip	3.358	8.593	1.045	6.201	2.55885	1.38568	0.168546	0.541523	Z-001386	Wtip	gene		D:\assemblies\Rattus_norvegicus-Rnor_6.0-dbSNP149\Rattus_norvegicus-Rnor_6.0-dbSNP149.genometemplate\sequences\NC_005100_chr1.gbk#0	282763074	NC_005100.4	-	33397	89999892..89966496	361552, 1306411		Wtip
RGD1308428	3.533	5.25	0.905	4.678	1.48591	1.12231	0.193423	0.755303	Z-001390	RGD1308428	gene		D:\assemblies\Rattus_norvegicus-Rnor_6.0-dbSNP149\Rattus_norvegicus-Rnor_6.0-dbSNP149.genometemplate\sequences\NC_005100_chr1.gbk#0	282763074	NC_005100.4	-	78789	90176119..90097331	308509, 1308428		RGD1308428
LOC108349466	0.154	0.755	0.001	0.145	4.91113	5.21815	0.00653237	1.06251	Z-001396	LOC108349466	gene		D:\assemblies\Rattus_norvegicus-Rnor_6.0-dbSNP149\Rattus_norvegicus-Rnor_6.0-dbSNP149.genometemplate\sequences\NC_005100_chr1.gbk#0	282763074	NC_005100.4	+	2940	90572864..90575803	108349466		LOC108349466
LOC108348106	0.142	3.471	12.269	2.645	24.4983	1.31229	4.63821	0.0535668	Z-001402	LOC108348106	gene		D:\assemblies\Rattus_norvegicus-Rnor_6.0-dbSNP149\Rattus_norvegicus-Rnor_6.0-dbSNP149.genometemplate\sequences\NC_005100_chr1.gbk#0	282763074	NC_005100.4	-	5410	90962541..90957132	108348106		LOC108348106
Ovol3	0.005	0.001	0.553	0.001	0.208407	1	585.009	4.7983	Z-001404	Ovol3	gene		D:\assemblies\Rattus_norvegicus-Rnor_6.0-dbSNP149\Rattus_norvegicus-Rnor_6.0-dbSNP149.genometemplate\sequences\NC_005100_chr1.gbk#0	282763074	NC_005100.4	+	3637	91037531..91041167	365226, 1583800		Ovol3
LOC100912309	3.17	6.901	16.805	4.109	2.1768	1.67958	4.09017	0.771582	Z-001411	LOC100912309	gene		D:\assemblies\Rattus_norvegicus-Rnor_6.0-dbSNP149\Rattus_norvegicus-Rnor_6.0-dbSNP149.genometemplate\sequences\NC_005100_chr1.gbk#0	282763074	NC_005100.4	+	2781	91168439..91171219	100912309, 6487705		LOC100912309
Pdcd5	14.255	38.042	107.684	20.357	2.66874	1.86872	5.28976	0.700227	Z-001412	Pdcd5	gene		D:\assemblies\Rattus_norvegicus-Rnor_6.0-dbSNP149\Rattus_norvegicus-Rnor_6.0-dbSNP149.genometemplate\sequences\NC_005100_chr1.gbk#0	282763074	NC_005100.4	-	5329	91178801..91173473	292814, 1310561		Pdcd5
Pdcd5	14.255	38.042	107.684	20.357	2.66874	1.86872	5.28976	0.700227	Z-001413	Pdcd5 [2]	gene		D:\assemblies\Rattus_norvegicus-Rnor_6.0-dbSNP149\Rattus_norvegicus-Rnor_6.0-dbSNP149.genometemplate\sequences\NC_005100_chr1.gbk#0	282763074	NC_005100.4	-	5426	91966439..91961014	108348109		Pdcd5
Cebpa	19.864	31.775	1.95	26.148	1.59965	1.2152	0.0745885	0.759664	Z-001417	Cebpa	gene		D:\assemblies\Rattus_norvegicus-Rnor_6.0-dbSNP149\Rattus_norvegicus-Rnor_6.0-dbSNP149.genometemplate\sequences\NC_005100_chr1.gbk#0	282763074	NC_005100.4	+	2673	91363492..91366164	24252, 2326		Cebpa	DBPCEP
Tshz3	0.053	0.579	0.052	0.452	10.9927	1.28014	0.115	0.116454	Z-001446	Tshz3	gene		D:\assemblies\Rattus_norvegicus-Rnor_6.0-dbSNP149\Rattus_norvegicus-Rnor_6.0-dbSNP149.genometemplate\sequences\NC_005100_chr1.gbk#0	282763074	NC_005100.4	-	71841	92775020..92703180	308523, 1306322		Tshz3	Zfp537
Ccne1	9.908	23.135	1.091	12.772	2.33488	1.81131	0.0854349	0.77576	Z-001456	Ccne1	gene		D:\assemblies\Rattus_norvegicus-Rnor_6.0-dbSNP149\Rattus_norvegicus-Rnor_6.0-dbSNP149.genometemplate\sequences\NC_005100_chr1.gbk#0	282763074	NC_005100.4	-	9283	94495112..94485830	25729, 2294		Ccne1	Ccne, CYCLE
LOC102555672	0.092	0.898	3.71	0.609	9.76874	1.47387	6.08826	0.150877	Z-001484	LOC102555672	gene		D:\assemblies\Rattus_norvegicus-Rnor_6.0-dbSNP149\Rattus_norvegicus-Rnor_6.0-dbSNP149.genometemplate\sequences\NC_005100_chr1.gbk#0	282763074	NC_005100.4	+	22366	98210294..98232659	102555672, 7701959		LOC102555672
Siglec10	1.978	1.735	14.99	1.285	0.877084	1.34956	11.6623	1.53869	Z-001497	Siglec10	gene		D:\assemblies\Rattus_norvegicus-Rnor_6.0-dbSNP149\Rattus_norvegicus-Rnor_6.0-dbSNP149.genometemplate\sequences\NC_005100_chr1.gbk#0	282763074	NC_005100.4	-	9074	98521736..98512663	292844, 1307441		Siglec10	Siglecg
Klk1b3	0.001	0.008	0.301	0.001	8.42407	8.42407	318.613	1	Z-001548	Klk1b3	gene		D:\assemblies\Rattus_norvegicus-Rnor_6.0-dbSNP149\Rattus_norvegicus-Rnor_6.0-dbSNP149.genometemplate\sequences\NC_005100_chr1.gbk#0	282763074	NC_005100.4	+	4204	100199057..100203260	24594, 3175		Klk1b3	Klk1, Klk1c1, Ngfg, rGK-1, rK-1
Acpt	0.082	0.081	8.264	0.569	0.981553	0.141542	14.512	0.144202	Z-001552	Acpt	gene		D:\assemblies\Rattus_norvegicus-Rnor_6.0-dbSNP149\Rattus_norvegicus-Rnor_6.0-dbSNP149.genometemplate\sequences\NC_005100_chr1.gbk#0	282763074	NC_005100.4	-	8226	100234536..100226311	308569, 1308270		Acpt
Aspdh	0.001	0.001	0.384	0.001	1	1	405.941	1	Z-001562	Aspdh	gene		D:\assemblies\Rattus_norvegicus-Rnor_6.0-dbSNP149\Rattus_norvegicus-Rnor_6.0-dbSNP149.genometemplate\sequences\NC_005100_chr1.gbk#0	282763074	NC_005100.4	+	2262	100471066..100473327	292875, 1310111		Aspdh	RGD1310111
Napsa	10.842	21.951	85.933	8.099	2.02469	2.71039	10.6106	1.33867	Z-001571	Napsa	gene		D:\assemblies\Rattus_norvegicus-Rnor_6.0-dbSNP149\Rattus_norvegicus-Rnor_6.0-dbSNP149.genometemplate\sequences\NC_005100_chr1.gbk#0	282763074	NC_005100.4	+	12306	100577497..100589802	60575, 61940		Napsa	Kdap
Vrk3	9.973	15.599	47.678	11.704	1.56409	1.33275	4.07357	0.852095	Z-001576	Vrk3	gene		D:\assemblies\Rattus_norvegicus-Rnor_6.0-dbSNP149\Rattus_norvegicus-Rnor_6.0-dbSNP149.genometemplate\sequences\NC_005100_chr1.gbk#0	282763074	NC_005100.4	+	27387	100755622..100783008	361565, 1549692		Vrk3
Atf5	30.573	66.078	5.505	40.362	2.16133	1.63712	0.1364	0.75746	Z-001577	Atf5	gene		D:\assemblies\Rattus_norvegicus-Rnor_6.0-dbSNP149\Rattus_norvegicus-Rnor_6.0-dbSNP149.genometemplate\sequences\NC_005100_chr1.gbk#0	282763074	NC_005100.4	-	4590	100812410..100807821	282840, 628902		Atf5
Pnkp	4.474	12.116	27.206	6.612	2.70816	1.8323	4.11447	0.676584	Z-001582	Pnkp	gene		D:\assemblies\Rattus_norvegicus-Rnor_6.0-dbSNP149\Rattus_norvegicus-Rnor_6.0-dbSNP149.genometemplate\sequences\NC_005100_chr1.gbk#0	282763074	NC_005100.4	+	5728	100853475..100859202	308576, 1303331		Pnkp
Irf3	5.641	14.224	209.715	7.327	2.52139	1.94137	28.6227	0.769959	Z-001591	Irf3	gene		D:\assemblies\Rattus_norvegicus-Rnor_6.0-dbSNP149\Rattus_norvegicus-Rnor_6.0-dbSNP149.genometemplate\sequences\NC_005100_chr1.gbk#0	282763074	NC_005100.4	+	4959	100992244..100997202	292892, 1549774		Irf3
Nosip	7.537	17.254	160.236	8.946	2.28942	1.92874	17.9117	0.842459	Z-001596	Nosip	gene		D:\assemblies\Rattus_norvegicus-Rnor_6.0-dbSNP149\Rattus_norvegicus-Rnor_6.0-dbSNP149.genometemplate\sequences\NC_005100_chr1.gbk#0	282763074	NC_005100.4	+	17368	101055571..101072938	292894, 1309992		Nosip
Rps11	690.48	1557.16	5658.94	827.296	2.25519	1.88223	6.84029	0.834622	Z-001600	Rps11	gene		D:\assemblies\Rattus_norvegicus-Rnor_6.0-dbSNP149\Rattus_norvegicus-Rnor_6.0-dbSNP149.genometemplate\sequences\NC_005100_chr1.gbk#0	282763074	NC_005100.4	-	2109	101118749..101116641	81774, 621026		Rps11
Rpl13a	873.088	2443.67	6412.48	1170.91	2.79888	2.08698	5.47649	0.745649	Z-001601	Rpl13a	gene		D:\assemblies\Rattus_norvegicus-Rnor_6.0-dbSNP149\Rattus_norvegicus-Rnor_6.0-dbSNP149.genometemplate\sequences\NC_005100_chr1.gbk#0	282763074	NC_005100.4	-	3077	101123401..101120325	317646, 628697		Rpl13a
Flt3lg	4.206	3.429	20.978	3.069	0.815259	1.1171	6.83487	1.37024	Z-001602	Flt3lg	gene		D:\assemblies\Rattus_norvegicus-Rnor_6.0-dbSNP149\Rattus_norvegicus-Rnor_6.0-dbSNP149.genometemplate\sequences\NC_005100_chr1.gbk#0	282763074	NC_005100.4	-	5408	101131413..101126006	103691134, 2322792		Flt3lg
Cd37	17.468	29.202	108.41	16.114	1.67175	1.81223	6.72764	1.08403	Z-001612	Cd37	gene		D:\assemblies\Rattus_norvegicus-Rnor_6.0-dbSNP149\Rattus_norvegicus-Rnor_6.0-dbSNP149.genometemplate\sequences\NC_005100_chr1.gbk#0	282763074	NC_005100.4	-	5592	101236061..101230470	29185, 62035		Cd37
Snrnp70	18.224	35.14	458.303	20.573	1.92826	1.70806	22.2766	0.885802	Z-001620	Snrnp70	gene		D:\assemblies\Rattus_norvegicus-Rnor_6.0-dbSNP149\Rattus_norvegicus-Rnor_6.0-dbSNP149.genometemplate\sequences\NC_005100_chr1.gbk#0	282763074	NC_005100.4	-	20684	101388153..101367470	361574, 1307120		Snrnp70	Snrp70
Ftl1	2263.59	5149.23	769.249	3128.99	2.2748	1.64565	0.245846	0.723427	Z-001626	Ftl1	gene		D:\assemblies\Rattus_norvegicus-Rnor_6.0-dbSNP149\Rattus_norvegicus-Rnor_6.0-dbSNP149.genometemplate\sequences\NC_005100_chr1.gbk#0	282763074	NC_005100.4	-	1845	101450034..101448190	29292, 61813		Ftl1	Ftl
Car11	0.145	0.156	5.47	0.273	1.07744	0.573538	20.0563	0.532313	Z-001645	Car11	gene		D:\assemblies\Rattus_norvegicus-Rnor_6.0-dbSNP149\Rattus_norvegicus-Rnor_6.0-dbSNP149.genometemplate\sequences\NC_005100_chr1.gbk#0	282763074	NC_005100.4	+	5350	101682009..101687358	308588, 735155		Car11	CAR-XI
Rpl18	331.827	923.74	1695.18	398.182	2.7838	2.3199	4.25731	0.833356	Z-001648	Rpl18	gene		D:\assemblies\Rattus_norvegicus-Rnor_6.0-dbSNP149\Rattus_norvegicus-Rnor_6.0-dbSNP149.genometemplate\sequences\NC_005100_chr1.gbk#0	282763074	NC_005100.4	+	2642	101700910..101703551	81766, 621182		Rpl18
Cyth2	10.879	14.258	53.842	11.58	1.31056	1.23126	4.64967	0.939486	Z-001653	Cyth2	gene		D:\assemblies\Rattus_norvegicus-Rnor_6.0-dbSNP149\Rattus_norvegicus-Rnor_6.0-dbSNP149.genometemplate\sequences\NC_005100_chr1.gbk#0	282763074	NC_005100.4	-	7059	101803407..101796349	116692, 620398		Cyth2	Arno, Pscd2, Sec7, Sec7B
Emp3	11.149	20.512	186.759	13.502	1.83976	1.51916	13.832	0.825739	Z-001660	Emp3	gene		D:\assemblies\Rattus_norvegicus-Rnor_6.0-dbSNP149\Rattus_norvegicus-Rnor_6.0-dbSNP149.genometemplate\sequences\NC_005100_chr1.gbk#0	282763074	NC_005100.4	-	3218	101903948..101900731	81505, 621094		Emp3
Abcc6	0.009	0.004	0.025	0.001	0.431336	3.95545	26.5849	9.17022	Z-001662	Abcc6	gene		D:\assemblies\Rattus_norvegicus-Rnor_6.0-dbSNP149\Rattus_norvegicus-Rnor_6.0-dbSNP149.genometemplate\sequences\NC_005100_chr1.gbk#0	282763074	NC_005100.4	-	58467	102013252..101954786	81642, 620268		Abcc6	Mrp6
LOC691143	2.95	4.068	22.01	4.276	1.37917	0.951414	5.14729	0.689844	Z-001675	LOC691143	gene		D:\assemblies\Rattus_norvegicus-Rnor_6.0-dbSNP149\Rattus_norvegicus-Rnor_6.0-dbSNP149.genometemplate\sequences\NC_005100_chr1.gbk#0	282763074	NC_005100.4	-	17982	102738103..102720122	691143, 1587443		LOC691143
LOC102552634	1.287	4.629	12.537	2.491	3.59611	1.8582	5.03255	0.516726	Z-001681	LOC102552634	gene		D:\assemblies\Rattus_norvegicus-Rnor_6.0-dbSNP149\Rattus_norvegicus-Rnor_6.0-dbSNP149.genometemplate\sequences\NC_005100_chr1.gbk#0	282763074	NC_005100.4	-	15043	102892535..102877493	102552634, 7636379		LOC102552634
LOC108349574	0.001	0.001	0.115	0.001	1	1	122.045	1	Z-001694	LOC108349574	gene		D:\assemblies\Rattus_norvegicus-Rnor_6.0-dbSNP149\Rattus_norvegicus-Rnor_6.0-dbSNP149.genometemplate\sequences\NC_005100_chr1.gbk#0	282763074	NC_005100.4	+	1324	103369786..103371109	108349574		LOC108349574
Mrgprb3	0.007	0.001	0.001	0.246	0.126945	0.00384318	0.00384318	0.0302743	Z-001704	Mrgprb3	gene		D:\assemblies\Rattus_norvegicus-Rnor_6.0-dbSNP149\Rattus_norvegicus-Rnor_6.0-dbSNP149.genometemplate\sequences\NC_005100_chr1.gbk#0	282763074	NC_005100.4	-	12908	103909958..103897051	691194, 1587398		Mrgprb3
Zdhhc13	0.567	1.11	3.772	0.697	1.9582	1.59316	5.41511	0.813585	Z-001707	Zdhhc13	gene		D:\assemblies\Rattus_norvegicus-Rnor_6.0-dbSNP149\Rattus_norvegicus-Rnor_6.0-dbSNP149.genometemplate\sequences\NC_005100_chr1.gbk#0	282763074	NC_005100.4	+	38835	104106211..104145045	365252, 1309736		Zdhhc13
E2f8	4.204	6.822	0.424	5.464	1.62284	1.24868	0.0775927	0.769441	Z-001709	E2f8	gene		D:\assemblies\Rattus_norvegicus-Rnor_6.0-dbSNP149\Rattus_norvegicus-Rnor_6.0-dbSNP149.genometemplate\sequences\NC_005100_chr1.gbk#0	282763074	NC_005100.4	-	18248	104203683..104185436	308607, 1308091		E2f8
Siglech	0.001	0.001	0.322	0.001	1	1	340.305	1	Z-001745	Siglech	gene		D:\assemblies\Rattus_norvegicus-Rnor_6.0-dbSNP149\Rattus_norvegicus-Rnor_6.0-dbSNP149.genometemplate\sequences\NC_005100_chr1.gbk#0	282763074	NC_005100.4	+	106409	114046308..114152716	361584, 1310401		Siglech
LOC108348211	0.497	0.001	1.427	0.001	0.0019034	1	1509.48	525.377	Z-001795	LOC108348211	gene		D:\assemblies\Rattus_norvegicus-Rnor_6.0-dbSNP149\Rattus_norvegicus-Rnor_6.0-dbSNP149.genometemplate\sequences\NC_005100_chr1.gbk#0	282763074	NC_005100.4	-	537	118893309..118892773	108348211		LOC108348211
Ndn	0.064	0.012	0.001	0.261	0.19391	0.0475182	0.00362802	0.245053	Z-001818	Ndn	gene		D:\assemblies\Rattus_norvegicus-Rnor_6.0-dbSNP149\Rattus_norvegicus-Rnor_6.0-dbSNP149.genometemplate\sequences\NC_005100_chr1.gbk#0	282763074	NC_005100.4	+	1600	122981755..122983354	308690, 1310526		Ndn
LOC108349585	0.001	0.006	1.679	0.001	5.91858	5.91858	1776.83	1	Z-001831	LOC108349585	gene		D:\assemblies\Rattus_norvegicus-Rnor_6.0-dbSNP149\Rattus_norvegicus-Rnor_6.0-dbSNP149.genometemplate\sequences\NC_005100_chr1.gbk#0	282763074	NC_005100.4	+	7462	124828939..124836400	108349585		LOC108349585
Mtmr10	0.909	1.169	0.18	1.486	1.28605	0.786888	0.121287	0.611863	Z-001835	Mtmr10	gene		D:\assemblies\Rattus_norvegicus-Rnor_6.0-dbSNP149\Rattus_norvegicus-Rnor_6.0-dbSNP149.genometemplate\sequences\NC_005100_chr1.gbk#0	282763074	NC_005100.4	+	51115	125124743..125175857	309255, 1305958		Mtmr10	RGD1305958
Mphosph10	3.189	4.394	27.792	3.594	1.37777	1.22242	7.73255	0.887245	Z-001837	Mphosph10	gene		D:\assemblies\Rattus_norvegicus-Rnor_6.0-dbSNP149\Rattus_norvegicus-Rnor_6.0-dbSNP149.genometemplate\sequences\NC_005100_chr1.gbk#0	282763074	NC_005100.4	-	16192	125229060..125212869	293828, 1307633		Mphosph10
Pcsk6	1.114	0.148	0.003	0.901	0.132497	0.163728	0.00303093	1.23571	Z-001853	Pcsk6	gene		D:\assemblies\Rattus_norvegicus-Rnor_6.0-dbSNP149\Rattus_norvegicus-Rnor_6.0-dbSNP149.genometemplate\sequences\NC_005100_chr1.gbk#0	282763074	NC_005100.4	+	197885	126749508..126947392	25507, 3246		Pcsk6	Pace4, Spc4
Chsy1	1.208	2.333	0.31	2.137	1.93079	1.09162	0.145128	0.565374	Z-001857	Chsy1	gene		D:\assemblies\Rattus_norvegicus-Rnor_6.0-dbSNP149\Rattus_norvegicus-Rnor_6.0-dbSNP149.genometemplate\sequences\NC_005100_chr1.gbk#0	282763074	NC_005100.4	+	60984	127010587..127071570	292999, 1311904		Chsy1
Ttc23	2.46	2.085	0.333	3.324	0.84743	0.627227	0.100092	0.740152	Z-001873	Ttc23	gene		D:\assemblies\Rattus_norvegicus-Rnor_6.0-dbSNP149\Rattus_norvegicus-Rnor_6.0-dbSNP149.genometemplate\sequences\NC_005100_chr1.gbk#0	282763074	NC_005100.4	+	83577	128604324..128687900	308708, 1310409		Ttc23	RGD1310409
LOC108349234	0.001	0.005	0.069	0.001	5.25642	5.25642	73.0906	1	Z-001874	LOC108349234	gene		D:\assemblies\Rattus_norvegicus-Rnor_6.0-dbSNP149\Rattus_norvegicus-Rnor_6.0-dbSNP149.genometemplate\sequences\NC_005100_chr1.gbk#0	282763074	NC_005100.4	-	20781	128630905..128610125	108349234		LOC108349234
LOC102553173	0.071	0.161	1.045	0.117	2.25894	1.37505	8.91315	0.608714	Z-001884	LOC102553173	gene		D:\assemblies\Rattus_norvegicus-Rnor_6.0-dbSNP149\Rattus_norvegicus-Rnor_6.0-dbSNP149.genometemplate\sequences\NC_005100_chr1.gbk#0	282763074	NC_005100.4	-	50470	131432779..131382310	102553173, 7683637		LOC102553173
Nr2f2	8.663	9.098	1.933	10.213	1.05018	0.89083	0.189314	0.848265	Z-001885	Nr2f2	gene		D:\assemblies\Rattus_norvegicus-Rnor_6.0-dbSNP149\Rattus_norvegicus-Rnor_6.0-dbSNP149.genometemplate\sequences\NC_005100_chr1.gbk#0	282763074	NC_005100.4	-	18079	131465749..131447671	113984, 69305		Nr2f2	Tfcoup2
LOC102554078	0.006	0.045	0.001	0.046	7.80911	0.988982	0.0207145	0.126645	Z-001896	LOC102554078	gene		D:\assemblies\Rattus_norvegicus-Rnor_6.0-dbSNP149\Rattus_norvegicus-Rnor_6.0-dbSNP149.genometemplate\sequences\NC_005100_chr1.gbk#0	282763074	NC_005100.4	-	3216	134427851..134424636	102554078, 7634877		LOC102554078
LOC108349594	16.482	30.764	213.398	20.192	1.86651	1.52357	10.5685	0.816265	Z-001899	LOC108349594	gene		D:\assemblies\Rattus_norvegicus-Rnor_6.0-dbSNP149\Rattus_norvegicus-Rnor_6.0-dbSNP149.genometemplate\sequences\NC_005100_chr1.gbk#0	282763074	NC_005100.4	-	14710	134888108..134873399	108349594		LOC108349594
LOC108348469	0.001	0.001	0.015	0.001	1	1	15.5537	1	Z-001908	LOC108348469	gene		D:\assemblies\Rattus_norvegicus-Rnor_6.0-dbSNP149\Rattus_norvegicus-Rnor_6.0-dbSNP149.genometemplate\sequences\NC_005100_chr1.gbk#0	282763074	NC_005100.4	-	9055	135973052..135963998	108348469		LOC108348469
LOC103691165	0.281	0.477	2.795	0.283	1.69532	1.68636	9.87749	0.994709	Z-001916	LOC103691165	gene		D:\assemblies\Rattus_norvegicus-Rnor_6.0-dbSNP149\Rattus_norvegicus-Rnor_6.0-dbSNP149.genometemplate\sequences\NC_005100_chr1.gbk#0	282763074	NC_005100.4	-	5913	137426137..137420225	103691165, 9322177		LOC103691165
Hapln3	0.028	0.046	2.33	0.001	1.63663	48.4878	2464.92	29.6267	Z-001934	Hapln3	gene		D:\assemblies\Rattus_norvegicus-Rnor_6.0-dbSNP149\Rattus_norvegicus-Rnor_6.0-dbSNP149.genometemplate\sequences\NC_005100_chr1.gbk#0	282763074	NC_005100.4	-	18108	140845386..140827279	308773, 1308098		Hapln3
LOC103691170	20.454	59.839	242.286	26.117	2.92546	2.29114	9.2768	0.783171	Z-001936	LOC103691170	gene		D:\assemblies\Rattus_norvegicus-Rnor_6.0-dbSNP149\Rattus_norvegicus-Rnor_6.0-dbSNP149.genometemplate\sequences\NC_005100_chr1.gbk#0	282763074	NC_005100.4	+	6997	140891600..140898596	103691170, 9269367		LOC103691170
Prc1	7.477	9.927	0.768	9.403	1.32773	1.05571	0.0816648	0.795126	Z-001976	Prc1	gene		D:\assemblies\Rattus_norvegicus-Rnor_6.0-dbSNP149\Rattus_norvegicus-Rnor_6.0-dbSNP149.genometemplate\sequences\NC_005100_chr1.gbk#0	282763074	NC_005100.4	+	21566	142087181..142108746	308761, 1311754		Prc1
LOC102553801	3.022	9.347	21.051	4.495	3.09266	2.0795	4.68334	0.672398	Z-001982	LOC102553801	gene		D:\assemblies\Rattus_norvegicus-Rnor_6.0-dbSNP149\Rattus_norvegicus-Rnor_6.0-dbSNP149.genometemplate\sequences\NC_005100_chr1.gbk#0	282763074	NC_005100.4	+	1712	142184020..142185731	102553801, 7565709		LOC102553801
Furin	6.723	9.417	1.15	7.085	1.40068	1.32905	0.16233	0.948863	Z-001983	Furin	gene		D:\assemblies\Rattus_norvegicus-Rnor_6.0-dbSNP149\Rattus_norvegicus-Rnor_6.0-dbSNP149.genometemplate\sequences\NC_005100_chr1.gbk#0	282763074	NC_005100.4	-	13076	142198167..142185092	54281, 3274		Furin	Pace, Pcsk3
Pde8a	1.672	0.944	0.42	2.15	0.564333	0.438857	0.195339	0.777656	Z-002000	Pde8a	gene		D:\assemblies\Rattus_norvegicus-Rnor_6.0-dbSNP149\Rattus_norvegicus-Rnor_6.0-dbSNP149.genometemplate\sequences\NC_005100_chr1.gbk#0	282763074	NC_005100.4	+	124313	143036083..143160395	308776, 735125		Pde8a	RNPDE8A
Rps17	493.908	1473.46	3431.46	587.758	2.98328	2.50692	5.83822	0.840324	Z-002001	Rps17	gene		D:\assemblies\Rattus_norvegicus-Rnor_6.0-dbSNP149\Rattus_norvegicus-Rnor_6.0-dbSNP149.genometemplate\sequences\NC_005100_chr1.gbk#0	282763074	NC_005100.4	-	2587	143169915..143167329	29286, 62027		Rps17
LOC103691181	0.001	0.001	0.082	0.001	1	1	86.9615	1	Z-002030	LOC103691181	gene		D:\assemblies\Rattus_norvegicus-Rnor_6.0-dbSNP149\Rattus_norvegicus-Rnor_6.0-dbSNP149.genometemplate\sequences\NC_005100_chr1.gbk#0	282763074	NC_005100.4	+	15968	145505886..145521853	103691181, 9335574		LOC103691181
Cfap161	0.001	0.001	1.345	0.001	1	1	1423.06	1	Z-002035	Cfap161	gene		D:\assemblies\Rattus_norvegicus-Rnor_6.0-dbSNP149\Rattus_norvegicus-Rnor_6.0-dbSNP149.genometemplate\sequences\NC_005100_chr1.gbk#0	282763074	NC_005100.4	-	24491	145931583..145907093	308794, 1310371		Cfap161	RGD1310371
LOC108349171	0.001	0.003	0.027	0.001	3.55933	3.55933	29.0141	1	Z-002040	LOC108349171	gene		D:\assemblies\Rattus_norvegicus-Rnor_6.0-dbSNP149\Rattus_norvegicus-Rnor_6.0-dbSNP149.genometemplate\sequences\NC_005100_chr1.gbk#0	282763074	NC_005100.4	+	30567	146289823..146320389	108349171		LOC108349171
Fah	4.07	8.373	15.964	3.217	2.05715	2.60303	4.96272	1.26536	Z-002044	Fah	gene		D:\assemblies\Rattus_norvegicus-Rnor_6.0-dbSNP149\Rattus_norvegicus-Rnor_6.0-dbSNP149.genometemplate\sequences\NC_005100_chr1.gbk#0	282763074	NC_005100.4	-	22677	146736339..146713663	29383, 61932		Fah
LOC100911879	0.107	0.503	0.7	0.073	4.72384	6.90822	9.60475	1.46241	Z-002061	LOC100911879	gene		D:\assemblies\Rattus_norvegicus-Rnor_6.0-dbSNP149\Rattus_norvegicus-Rnor_6.0-dbSNP149.genometemplate\sequences\NC_005100_chr1.gbk#0	282763074	NC_005100.4	-	28496	148380128..148351633	100911879, 6490137		LOC100911879
Mpp1	27.16	54.704	4.993	35.974	2.01416	1.52065	0.138784	0.754976	Z-002064	Mpp1	gene		D:\assemblies\Rattus_norvegicus-Rnor_6.0-dbSNP149\Rattus_norvegicus-Rnor_6.0-dbSNP149.genometemplate\sequences\NC_005100_chr1.gbk#0	282763074	NC_005100.4	+	8733	148450213..148458945	652956, 1594331		Mpp1	p55
LOC102554680	0.003	0.001	0.058	0.001	0.290657	1	61.3677	3.44048	Z-002096	LOC102554680	gene		D:\assemblies\Rattus_norvegicus-Rnor_6.0-dbSNP149\Rattus_norvegicus-Rnor_6.0-dbSNP149.genometemplate\sequences\NC_005100_chr1.gbk#0	282763074	NC_005100.4	-	7410	151916003..151908594	102554680, 7641285		LOC102554680
LOC102550036	2.046	2.38	6.975	1.468	1.16324	1.62136	4.75107	1.39383	Z-002109	LOC102550036	gene		D:\assemblies\Rattus_norvegicus-Rnor_6.0-dbSNP149\Rattus_norvegicus-Rnor_6.0-dbSNP149.genometemplate\sequences\NC_005100_chr1.gbk#0	282763074	NC_005100.4	-	5223	154377110..154371888	102550036, 7499284		LOC102550036
Picalm	36.403	55.051	6.022	43.946	1.51224	1.25268	0.137034	0.82836	Z-002110	Picalm	gene		D:\assemblies\Rattus_norvegicus-Rnor_6.0-dbSNP149\Rattus_norvegicus-Rnor_6.0-dbSNP149.genometemplate\sequences\NC_005100_chr1.gbk#0	282763074	NC_005100.4	+	81738	154377229..154458966	89816, 621054		Picalm	Calm
Crebzf	1.988	5.171	16.349	2.865	2.6018	1.80517	5.70728	0.693816	Z-002123	Crebzf	gene		D:\assemblies\Rattus_norvegicus-Rnor_6.0-dbSNP149\Rattus_norvegicus-Rnor_6.0-dbSNP149.genometemplate\sequences\NC_005100_chr1.gbk#0	282763074	NC_005100.4	-	6677	156296891..156290215	293112, 1565584		Crebzf	RGD1565584
LOC108349194	0.004	0.004	0.04	0.001	1.09584	4.44759	42.2902	4.05863	Z-002139	LOC108349194	gene		D:\assemblies\Rattus_norvegicus-Rnor_6.0-dbSNP149\Rattus_norvegicus-Rnor_6.0-dbSNP149.genometemplate\sequences\NC_005100_chr1.gbk#0	282763074	NC_005100.4	-	13681	162004480..161990800	108349194		LOC108349194
Ndufc2	14.078	26.46	75.294	15.282	1.87952	1.73144	4.92685	0.921215	Z-002145	Ndufc2	gene		D:\assemblies\Rattus_norvegicus-Rnor_6.0-dbSNP149\Rattus_norvegicus-Rnor_6.0-dbSNP149.genometemplate\sequences\NC_005100_chr1.gbk#0	282763074	NC_005100.4	+	6224	162369801..162376024	293130, 1307511		Ndufc2
LOC108349448	0.001	0.001	1.564	0.001	1	1	1654.91	1	Z-002163	LOC108349448	gene		D:\assemblies\Rattus_norvegicus-Rnor_6.0-dbSNP149\Rattus_norvegicus-Rnor_6.0-dbSNP149.genometemplate\sequences\NC_005100_chr1.gbk#0	282763074	NC_005100.4	-	10596	163344964..163334369	108349448		LOC108349448
Gucy2d	0.001	0.003	0.061	0.001	3.37799	3.37799	64.7055	1	Z-002164	Gucy2d	gene		D:\assemblies\Rattus_norvegicus-Rnor_6.0-dbSNP149\Rattus_norvegicus-Rnor_6.0-dbSNP149.genometemplate\sequences\NC_005100_chr1.gbk#0	282763074	NC_005100.4	+	34704	163398891..163433594	113911, 69322		Gucy2d
Olr35	0.009	0.001	0.207	0.001	0.110654	1	219.349	9.03719	Z-002209	Olr35	gene		D:\assemblies\Rattus_norvegicus-Rnor_6.0-dbSNP149\Rattus_norvegicus-Rnor_6.0-dbSNP149.genometemplate\sequences\NC_005100_chr1.gbk#0	282763074	NC_005100.4	+	920	164706276..164707195	293140, 1333428		Olr35
Spcs2	7.529	12.335	49.417	9.232	1.63834	1.33616	5.35299	0.815558	Z-002213	Spcs2	gene		D:\assemblies\Rattus_norvegicus-Rnor_6.0-dbSNP149\Rattus_norvegicus-Rnor_6.0-dbSNP149.genometemplate\sequences\NC_005100_chr1.gbk#0	282763074	NC_005100.4	-	19854	164849749..164829896	293142, 1311253		Spcs2	RGD1311253
Ppme1	3.636	8.231	1.221	6.096	2.26378	1.35023	0.200315	0.596448	Z-002224	Ppme1	gene		D:\assemblies\Rattus_norvegicus-Rnor_6.0-dbSNP149\Rattus_norvegicus-Rnor_6.0-dbSNP149.genometemplate\sequences\NC_005100_chr1.gbk#0	282763074	NC_005100.4	-	46975	165382216..165335242	361613, 1309683		Ppme1	PME-1, RGD1309683
LOC103691200	0.001	0.005	0.293	0.001	5.22778	5.22778	310.25	1	Z-002230	LOC103691200	gene		D:\assemblies\Rattus_norvegicus-Rnor_6.0-dbSNP149\Rattus_norvegicus-Rnor_6.0-dbSNP149.genometemplate\sequences\NC_005100_chr1.gbk#0	282763074	NC_005100.4	+	16912	165520122..165537033	103691200, 9145766		LOC103691200
Rab6a	18.266	34.955	3.741	25.485	1.91371	1.37162	0.146803	0.716731	Z-002234	Rab6a	gene		D:\assemblies\Rattus_norvegicus-Rnor_6.0-dbSNP149\Rattus_norvegicus-Rnor_6.0-dbSNP149.genometemplate\sequences\NC_005100_chr1.gbk#0	282763074	NC_005100.4	+	39229	165624973..165664201	84379, 619737		Rab6a	Rab6, Rab6b, RCO4-3
Stard10	1.667	0.131	22.351	1.217	0.0783493	0.107341	18.3711	1.37003	Z-002248	Stard10	gene		D:\assemblies\Rattus_norvegicus-Rnor_6.0-dbSNP149\Rattus_norvegicus-Rnor_6.0-dbSNP149.genometemplate\sequences\NC_005100_chr1.gbk#0	282763074	NC_005100.4	+	29634	166428780..166458413	293150, 1306548		Stard10
Art2b	0.064	0.006	63.433	0.228	0.0959707	0.0271563	278.689	0.282965	Z-002252	Art2b	gene		D:\assemblies\Rattus_norvegicus-Rnor_6.0-dbSNP149\Rattus_norvegicus-Rnor_6.0-dbSNP149.genometemplate\sequences\NC_005100_chr1.gbk#0	282763074	NC_005100.4	-	20069	166685097..166665029	293152, 3521		Art2b	Ag-F, Art2, Art2a, ARTC2, Ly-2, LY2, PtaA, Rt6, RT6.1, RT6.2
Hbb-b1	1104.45	2957.13	2.099	1366.76	2.67745	2.1636	0.00153575	0.808083	Z-002361	Hbb-b1	gene		D:\assemblies\Rattus_norvegicus-Rnor_6.0-dbSNP149\Rattus_norvegicus-Rnor_6.0-dbSNP149.genometemplate\sequences\NC_005100_chr1.gbk#0	282763074	NC_005100.4	+	7493	168945531..168953023	361619, 1595848		Hbb-b1
LOC100134871	4577.85	14518.1	10.154	5682.76	3.17138	2.55476	0.00178679	0.805568	Z-002362	LOC100134871	gene		D:\assemblies\Rattus_norvegicus-Rnor_6.0-dbSNP149\Rattus_norvegicus-Rnor_6.0-dbSNP149.genometemplate\sequences\NC_005100_chr1.gbk#0	282763074	NC_005100.4	+	1377	168957460..168958836	100134871, 2290038		LOC100134871
Hbb	6157.83	20051.2	7.633	7574.3	3.25622	2.64727	0.00100775	0.812989	Z-002364	Hbb	gene		D:\assemblies\Rattus_norvegicus-Rnor_6.0-dbSNP149\Rattus_norvegicus-Rnor_6.0-dbSNP149.genometemplate\sequences\NC_005100_chr1.gbk#0	282763074	NC_005100.4	-	1412	168972680..168971269	24440, 2783		Hbb
LOC102555557	0.002	0.278	0.275	0.001	140.53	294.454	290.48	2.09531	Z-002377	LOC102555557	gene		D:\assemblies\Rattus_norvegicus-Rnor_6.0-dbSNP149\Rattus_norvegicus-Rnor_6.0-dbSNP149.genometemplate\sequences\NC_005100_chr1.gbk#0	282763074	NC_005100.4	-	9265	169181469..169172205	102555557, 7646482		LOC102555557
Olr219	0.001	0.001	0.143	0.001	1	1	151.43	1	Z-002464	Olr219	gene		D:\assemblies\Rattus_norvegicus-Rnor_6.0-dbSNP149\Rattus_norvegicus-Rnor_6.0-dbSNP149.genometemplate\sequences\NC_005100_chr1.gbk#0	282763074	NC_005100.4	-	924	170933660..170932737	293365, 1334028		Olr219
Olfml1	0.008	0.005	0.487	0.001	0.593767	5.08558	514.775	8.56494	Z-002482	Olfml1	gene		D:\assemblies\Rattus_norvegicus-Rnor_6.0-dbSNP149\Rattus_norvegicus-Rnor_6.0-dbSNP149.genometemplate\sequences\NC_005100_chr1.gbk#0	282763074	NC_005100.4	+	24293	171793782..171818074	361621, 1311854		Olfml1
Cyb5r2	0.112	0.206	0.216	1.897	1.83727	0.108341	0.113906	0.0589685	Z-002484	Cyb5r2	gene		D:\assemblies\Rattus_norvegicus-Rnor_6.0-dbSNP149\Rattus_norvegicus-Rnor_6.0-dbSNP149.genometemplate\sequences\NC_005100_chr1.gbk#0	282763074	NC_005100.4	-	10163	171981586..171971424	365345, 1308421		Cyb5r2	RGD1308421
LOC499229	0.16	0.136	1.802	0.143	0.848432	0.951206	12.6442	1.12113	Z-002525	LOC499229	gene		D:\assemblies\Rattus_norvegicus-Rnor_6.0-dbSNP149\Rattus_norvegicus-Rnor_6.0-dbSNP149.genometemplate\sequences\NC_005100_chr1.gbk#0	282763074	NC_005100.4	+	26227	173233675..173259901	499229, 1598220		LOC499229
Rpl27a	688.683	1594.35	8983.5	815.031	2.31507	1.95618	11.0223	0.844977	Z-002539	Rpl27a	gene		D:\assemblies\Rattus_norvegicus-Rnor_6.0-dbSNP149\Rattus_norvegicus-Rnor_6.0-dbSNP149.genometemplate\sequences\NC_005100_chr1.gbk#0	282763074	NC_005100.4	+	3019	174132798..174135816	293418, 1309771		Rpl27a
Sbf2	2.498	3.142	0.557	2.681	1.25757	1.17191	0.20789	0.931882	Z-002554	Sbf2	gene		D:\assemblies\Rattus_norvegicus-Rnor_6.0-dbSNP149\Rattus_norvegicus-Rnor_6.0-dbSNP149.genometemplate\sequences\NC_005100_chr1.gbk#0	282763074	NC_005100.4	-	471801	175420161..174948361	691042, 1588657		Sbf2	Mtmr13, RGD1559442
Ampd3	2.044	3.127	0.229	2.663	1.52972	1.1744	0.086047	0.767719	Z-002558	Ampd3	gene		D:\assemblies\Rattus_norvegicus-Rnor_6.0-dbSNP149\Rattus_norvegicus-Rnor_6.0-dbSNP149.genometemplate\sequences\NC_005100_chr1.gbk#0	282763074	NC_005100.4	+	45179	175585301..175630479	25095, 2111		Ampd3
rnf141	5.416	4.354	1.207	6.944	0.803915	0.627106	0.173848	0.780065	Z-002559	rnf141	gene		D:\assemblies\Rattus_norvegicus-Rnor_6.0-dbSNP149\Rattus_norvegicus-Rnor_6.0-dbSNP149.genometemplate\sequences\NC_005100_chr1.gbk#0	282763074	NC_005100.4	-	25830	175657485..175631656	308900, 1303154		rnf141
Mrvi1	2.622	7.173	0.199	3.07	2.73525	2.33611	0.064955	0.854076	Z-002561	Mrvi1	gene		D:\assemblies\Rattus_norvegicus-Rnor_6.0-dbSNP149\Rattus_norvegicus-Rnor_6.0-dbSNP149.genometemplate\sequences\NC_005100_chr1.gbk#0	282763074	NC_005100.4	-	122778	175804737..175681960	308899, 1309828		Mrvi1
LOC103691206	0.038	0.001	0.362	0.001	0.0251315	1	382.753	39.7907	Z-002564	LOC103691206	gene		D:\assemblies\Rattus_norvegicus-Rnor_6.0-dbSNP149\Rattus_norvegicus-Rnor_6.0-dbSNP149.genometemplate\sequences\NC_005100_chr1.gbk#0	282763074	NC_005100.4	+	1980	175871531..175873510	103691206, 9163275		LOC103691206
LOC100911864	0.78	4.691	0.252	1.559	6.01182	3.01002	0.161612	0.500683	Z-002567	LOC100911864	gene		D:\assemblies\Rattus_norvegicus-Rnor_6.0-dbSNP149\Rattus_norvegicus-Rnor_6.0-dbSNP149.genometemplate\sequences\NC_005100_chr1.gbk#0	282763074	NC_005100.4	+	4207	175976456..175980662	100911864, 6489976		LOC100911864
Mical2	1.96	3.106	0.466	3.067	1.5847	1.01262	0.152001	0.638997	Z-002587	Mical2	gene		D:\assemblies\Rattus_norvegicus-Rnor_6.0-dbSNP149\Rattus_norvegicus-Rnor_6.0-dbSNP149.genometemplate\sequences\NC_005100_chr1.gbk#0	282763074	NC_005100.4	+	125123	177048607..177173729	365352, 1311773		Mical2	MICAL-2, RGD1311773
LOC102548665	0.095	0.453	2.193	0.282	4.76533	1.60321	7.76333	0.336432	Z-002609	LOC102548665	gene		D:\assemblies\Rattus_norvegicus-Rnor_6.0-dbSNP149\Rattus_norvegicus-Rnor_6.0-dbSNP149.genometemplate\sequences\NC_005100_chr1.gbk#0	282763074	NC_005100.4	+	4044	183729688..183733731	102548665, 7592935		LOC102548665
Calcb	0.001	0.001	0.673	0.001	1	1	711.919	1	Z-002615	Calcb	gene		D:\assemblies\Rattus_norvegicus-Rnor_6.0-dbSNP149\Rattus_norvegicus-Rnor_6.0-dbSNP149.genometemplate\sequences\NC_005100_chr1.gbk#0	282763074	NC_005100.4	+	5365	184271116..184276480	171519, 620997		Calcb
Pik3c2a	0.999	1.317	0.15	1.322	1.31893	0.996009	0.113789	0.755167	Z-002622	Pik3c2a	gene		D:\assemblies\Rattus_norvegicus-Rnor_6.0-dbSNP149\Rattus_norvegicus-Rnor_6.0-dbSNP149.genometemplate\sequences\NC_005100_chr1.gbk#0	282763074	NC_005100.4	+	115393	185210922..185326314	361632, 1310389		Pik3c2a
Sox6	1.317	1.211	0.001	1.545	0.919807	0.783827	0.000611661	0.852165	Z-002627	Sox6	gene		D:\assemblies\Rattus_norvegicus-Rnor_6.0-dbSNP149\Rattus_norvegicus-Rnor_6.0-dbSNP149.genometemplate\sequences\NC_005100_chr1.gbk#0	282763074	NC_005100.4	+	554491	185631702..186186192	293165, 1309000		Sox6
Rps15a	391.659	1153.05	2674.88	492.993	2.944	2.33887	5.42579	0.794452	Z-002631	Rps15a	gene		D:\assemblies\Rattus_norvegicus-Rnor_6.0-dbSNP149\Rattus_norvegicus-Rnor_6.0-dbSNP149.genometemplate\sequences\NC_005100_chr1.gbk#0	282763074	NC_005100.4	-	6870	187766734..187759865	117053, 619939		Rps15a
LOC108349625	0.001	0.022	0.073	0.001	22.9153	22.9153	77.5077	1	Z-002638	LOC108349625	gene		D:\assemblies\Rattus_norvegicus-Rnor_6.0-dbSNP149\Rattus_norvegicus-Rnor_6.0-dbSNP149.genometemplate\sequences\NC_005100_chr1.gbk#0	282763074	NC_005100.4	-	11647	188171009..188159363	108349625		LOC108349625
Crym	41.013	111.436	1.191	63.769	2.71709	1.7475	0.0186803	0.643153	Z-002674	Crym	gene		D:\assemblies\Rattus_norvegicus-Rnor_6.0-dbSNP149\Rattus_norvegicus-Rnor_6.0-dbSNP149.genometemplate\sequences\NC_005100_chr1.gbk#0	282763074	NC_005100.4	-	15175	189960069..189944895	117024, 620943		Crym	CDK108
Cdr2	13.676	23.079	0.622	15.309	1.68753	1.50757	0.0406484	0.893358	Z-002701	Cdr2	gene		D:\assemblies\Rattus_norvegicus-Rnor_6.0-dbSNP149\Rattus_norvegicus-Rnor_6.0-dbSNP149.genometemplate\sequences\NC_005100_chr1.gbk#0	282763074	NC_005100.4	-	24909	190914606..190889698	308958, 1310578		Cdr2	RGD1310578
LOC108349633	0.131	0.784	0.347	0.001	5.97224	830.033	367.358	138.982	Z-002741	LOC108349633	gene		D:\assemblies\Rattus_norvegicus-Rnor_6.0-dbSNP149\Rattus_norvegicus-Rnor_6.0-dbSNP149.genometemplate\sequences\NC_005100_chr1.gbk#0	282763074	NC_005100.4	-	8689	194855543..194846855	108349633		LOC108349633
LOC103691231	0.006	0.008	0.211	0.001	1.25131	8.16737	223.627	6.52706	Z-002742	LOC103691231	gene		D:\assemblies\Rattus_norvegicus-Rnor_6.0-dbSNP149\Rattus_norvegicus-Rnor_6.0-dbSNP149.genometemplate\sequences\NC_005100_chr1.gbk#0	282763074	NC_005100.4	-	73171	194929649..194856479	103691231, 9199564		LOC103691231
Il21r	0.872	0.125	78.977	1.06	0.143827	0.118265	74.5078	0.822267	Z-002765	Il21r	gene		D:\assemblies\Rattus_norvegicus-Rnor_6.0-dbSNP149\Rattus_norvegicus-Rnor_6.0-dbSNP149.genometemplate\sequences\NC_005100_chr1.gbk#0	282763074	NC_005100.4	+	27781	196996405..197024185	308977, 1304950		Il21r
Sbk1	2.098	1.859	0.242	1.263	0.88613	1.47239	0.191993	1.66159	Z-002773	Sbk1	gene		D:\assemblies\Rattus_norvegicus-Rnor_6.0-dbSNP149\Rattus_norvegicus-Rnor_6.0-dbSNP149.genometemplate\sequences\NC_005100_chr1.gbk#0	282763074	NC_005100.4	+	44802	197636230..197681031	113907, 628713		Sbk1	Sbk
Lat	12.304	33	211.84	15.194	2.68198	2.17188	13.9422	0.809807	Z-002775	Lat	gene		D:\assemblies\Rattus_norvegicus-Rnor_6.0-dbSNP149\Rattus_norvegicus-Rnor_6.0-dbSNP149.genometemplate\sequences\NC_005100_chr1.gbk#0	282763074	NC_005100.4	-	5026	197770669..197765644	81511, 620802		Lat
Spns1	1.447	1.401	9.832	1.277	0.968533	1.09688	7.69755	1.13252	Z-002776	Spns1	gene		D:\assemblies\Rattus_norvegicus-Rnor_6.0-dbSNP149\Rattus_norvegicus-Rnor_6.0-dbSNP149.genometemplate\sequences\NC_005100_chr1.gbk#0	282763074	NC_005100.4	-	7311	197778506..197771196	361648, 1305613		Spns1	RGD1305613
Cd19	0.33	0.043	42.944	0.395	0.129171	0.107788	108.747	0.834457	Z-002778	Cd19	gene		D:\assemblies\Rattus_norvegicus-Rnor_6.0-dbSNP149\Rattus_norvegicus-Rnor_6.0-dbSNP149.genometemplate\sequences\NC_005100_chr1.gbk#0	282763074	NC_005100.4	-	6702	197822123..197815422	365367, 1309086		Cd19
Sgf29	4.762	13.143	44.557	7.687	2.7601	1.7097	5.79632	0.619435	Z-002790	Sgf29	gene		D:\assemblies\Rattus_norvegicus-Rnor_6.0-dbSNP149\Rattus_norvegicus-Rnor_6.0-dbSNP149.genometemplate\sequences\NC_005100_chr1.gbk#0	282763074	NC_005100.4	+	33521	198066974..198100494	293488, 1310609		Sgf29	Ccdc101, RGD1310609
Sult1a1	19.523	43.787	8.174	41.994	2.24288	1.04269	0.194654	0.464889	Z-002791	Sult1a1	gene		D:\assemblies\Rattus_norvegicus-Rnor_6.0-dbSNP149\Rattus_norvegicus-Rnor_6.0-dbSNP149.genometemplate\sequences\NC_005100_chr1.gbk#0	282763074	NC_005100.4	-	3521	198104106..198100586	83783, 3767		Sult1a1	ASTIV, Mx-ST, PST-1, St1a1, Stm, Stp1, Sult1a3
RGD1565363	55.969	177.624	494.553	62.543	3.1736	2.84002	7.90739	0.894889	Z-002793	RGD1565363	gene		D:\assemblies\Rattus_norvegicus-Rnor_6.0-dbSNP149\Rattus_norvegicus-Rnor_6.0-dbSNP149.genometemplate\sequences\NC_005100_chr1.gbk#0	282763074	NC_005100.4	+	1055	198120104..198121158	502367, 1565363		RGD1565363
Coro1a	60.718	159.178	721.023	69.011	2.62162	2.30658	10.448	0.87983	Z-002794	Coro1a	gene		D:\assemblies\Rattus_norvegicus-Rnor_6.0-dbSNP149\Rattus_norvegicus-Rnor_6.0-dbSNP149.genometemplate\sequences\NC_005100_chr1.gbk#0	282763074	NC_005100.4	-	5008	198128890..198123883	155151, 620009		Coro1a
LOC108349642	0.033	1.349	12.759	0.222	40.5816	6.07107	57.4009	0.149602	Z-002795	LOC108349642	gene		D:\assemblies\Rattus_norvegicus-Rnor_6.0-dbSNP149\Rattus_norvegicus-Rnor_6.0-dbSNP149.genometemplate\sequences\NC_005100_chr1.gbk#0	282763074	NC_005100.4	-	3482	198143874..198140393	108349642		LOC108349642
Fam57b	1.529	4.855	0.001	2.368	3.17572	2.05032	0.000399171	0.645625	Z-002804	Fam57b	gene		D:\assemblies\Rattus_norvegicus-Rnor_6.0-dbSNP149\Rattus_norvegicus-Rnor_6.0-dbSNP149.genometemplate\sequences\NC_005100_chr1.gbk#0	282763074	NC_005100.4	+	13633	198252208..198265840	293493, 1308215		Fam57b	RGD1308215
Sez6l2	0.001	0.006	0.063	0.001	6.55595	6.55595	66.6138	1	Z-002813	Sez6l2	gene		D:\assemblies\Rattus_norvegicus-Rnor_6.0-dbSNP149\Rattus_norvegicus-Rnor_6.0-dbSNP149.genometemplate\sequences\NC_005100_chr1.gbk#0	282763074	NC_005100.4	+	20344	198383201..198403544	308988, 1565281		Sez6l2	RGD1565281
LOC102552638	0.007	0.001	0.198	0.001	0.141672	1	209.728	7.05854	Z-002814	LOC102552638	gene		D:\assemblies\Rattus_norvegicus-Rnor_6.0-dbSNP149\Rattus_norvegicus-Rnor_6.0-dbSNP149.genometemplate\sequences\NC_005100_chr1.gbk#0	282763074	NC_005100.4	-	3642	198409111..198405470	102552638, 7676737		LOC102552638
Mvp	12.394	17.796	67.905	14.304	1.43581	1.24409	4.74717	0.866471	Z-002817	Mvp	gene		D:\assemblies\Rattus_norvegicus-Rnor_6.0-dbSNP149\Rattus_norvegicus-Rnor_6.0-dbSNP149.genometemplate\sequences\NC_005100_chr1.gbk#0	282763074	NC_005100.4	-	27800	198448612..198420813	64681, 70932		Mvp
Maz	23.467	46.611	6.684	32.502	1.9863	1.43412	0.205654	0.722006	Z-002820	Maz	gene		D:\assemblies\Rattus_norvegicus-Rnor_6.0-dbSNP149\Rattus_norvegicus-Rnor_6.0-dbSNP149.genometemplate\sequences\NC_005100_chr1.gbk#0	282763074	NC_005100.4	-	3428	198460126..198456699	691842, 1594632		Maz	Pur-1
LOC108349645	0.001	0.001	0.647	0.001	1	1	684.706	1	Z-002824	LOC108349645	gene		D:\assemblies\Rattus_norvegicus-Rnor_6.0-dbSNP149\Rattus_norvegicus-Rnor_6.0-dbSNP149.genometemplate\sequences\NC_005100_chr1.gbk#0	282763074	NC_005100.4	+	1246	198489383..198490628	108349645		LOC108349645
Qprt	0.06	0.075	10.342	0.546	1.25989	0.138115	18.9525	0.109624	Z-002826	Qprt	gene		D:\assemblies\Rattus_norvegicus-Rnor_6.0-dbSNP149\Rattus_norvegicus-Rnor_6.0-dbSNP149.genometemplate\sequences\NC_005100_chr1.gbk#0	282763074	NC_005100.4	-	15295	198559556..198544262	293504, 1310309		Qprt
2018-09-01	6.751	12.156	134.136	5.307	1.80061	2.29057	25.2759	1.27211	Z-002832	2018-09-01	gene		D:\assemblies\Rattus_norvegicus-Rnor_6.0-dbSNP149\Rattus_norvegicus-Rnor_6.0-dbSNP149.genometemplate\sequences\NC_005100_chr1.gbk#0	282763074	NC_005100.4	-	3867	198662610..198658744	293507, 1307216		2018-09-01
Phkg2	8.468	18.275	64.564	11.805	2.15817	1.54814	5.46931	0.717339	Z-002849	Phkg2	gene		D:\assemblies\Rattus_norvegicus-Rnor_6.0-dbSNP149\Rattus_norvegicus-Rnor_6.0-dbSNP149.genometemplate\sequences\NC_005100_chr1.gbk#0	282763074	NC_005100.4	+	12756	199019298..199032053	140671, 620024		Phkg2
Hsd3b7	4.295	11.533	1.381	6.185	2.68508	1.86471	0.223232	0.694472	Z-002861	Hsd3b7	gene		D:\assemblies\Rattus_norvegicus-Rnor_6.0-dbSNP149\Rattus_norvegicus-Rnor_6.0-dbSNP149.genometemplate\sequences\NC_005100_chr1.gbk#0	282763074	NC_005100.4	+	3662	199248084..199251745	246211, 628727		Hsd3b7	Cca2
LOC108349648	21.517	72.533	202.348	26.955	3.37103	2.69089	7.50687	0.798241	Z-002863	LOC108349648	gene		D:\assemblies\Rattus_norvegicus-Rnor_6.0-dbSNP149\Rattus_norvegicus-Rnor_6.0-dbSNP149.genometemplate\sequences\NC_005100_chr1.gbk#0	282763074	NC_005100.4	+	6337	199270737..199277073	108349648		LOC108349648
Pycard	22.992	47.751	174.434	21.993	2.07688	2.17121	7.93135	1.04542	Z-002874	Pycard	gene		D:\assemblies\Rattus_norvegicus-Rnor_6.0-dbSNP149\Rattus_norvegicus-Rnor_6.0-dbSNP149.genometemplate\sequences\NC_005100_chr1.gbk#0	282763074	NC_005100.4	-	1034	199439062..199438029	282817, 628637		Pycard	Asc
Itgad	7.05	6.16	1.302	8.288	0.873803	0.743324	0.157071	0.850677	Z-002880	Itgad	gene		D:\assemblies\Rattus_norvegicus-Rnor_6.0-dbSNP149\Rattus_norvegicus-Rnor_6.0-dbSNP149.genometemplate\sequences\NC_005100_chr1.gbk#0	282763074	NC_005100.4	+	27964	199595968..199623931	64350, 71075		Itgad	Itgax
Cox6a2	0.149	0.017	11.989	0.675	0.114407	0.0251849	17.7587	0.220134	Z-002881	Cox6a2	gene		D:\assemblies\Rattus_norvegicus-Rnor_6.0-dbSNP149\Rattus_norvegicus-Rnor_6.0-dbSNP149.genometemplate\sequences\NC_005100_chr1.gbk#0	282763074	NC_005100.4	-	2219	199626255..199624037	25278, 2385		Cox6a2	COX6AH
Ahsp	450.867	1319.46	0.001	601.799	2.92648	2.19252	1.57051e-06	0.749199	Z-002888	Ahsp	gene		D:\assemblies\Rattus_norvegicus-Rnor_6.0-dbSNP149\Rattus_norvegicus-Rnor_6.0-dbSNP149.genometemplate\sequences\NC_005100_chr1.gbk#0	282763074	NC_005100.4	+	973	199720038..199721010	293522, 1306725		Ahsp	Eraf
RGD1560958	0.001	0.001	1.001	0.001	1	1	1059.39	1	Z-002918	RGD1560958	gene		D:\assemblies\Rattus_norvegicus-Rnor_6.0-dbSNP149\Rattus_norvegicus-Rnor_6.0-dbSNP149.genometemplate\sequences\NC_005100_chr1.gbk#0	282763074	NC_005100.4	-	9102	201914067..201904966	499277, 1560958		RGD1560958
Pstk	1.591	3.683	44.41	1.123	2.31519	3.27799	39.5312	1.41586	Z-002921	Pstk	gene		D:\assemblies\Rattus_norvegicus-Rnor_6.0-dbSNP149\Rattus_norvegicus-Rnor_6.0-dbSNP149.genometemplate\sequences\NC_005100_chr1.gbk#0	282763074	NC_005100.4	+	10416	201950148..201960563	361661, 1564300		Pstk	RGD1564300
Ikzf5	2.143	3.563	0.725	3.345	1.66222	1.06526	0.216768	0.640865	Z-002922	Ikzf5	gene		D:\assemblies\Rattus_norvegicus-Rnor_6.0-dbSNP149\Rattus_norvegicus-Rnor_6.0-dbSNP149.genometemplate\sequences\NC_005100_chr1.gbk#0	282763074	NC_005100.4	-	19727	201981250..201961524	309031, 1310965		Ikzf5	Zfpn1a5
Acadsb	1.717	2.34	0.265	2.544	1.36318	0.919729	0.104032	0.674693	Z-002923	Acadsb	gene		D:\assemblies\Rattus_norvegicus-Rnor_6.0-dbSNP149\Rattus_norvegicus-Rnor_6.0-dbSNP149.genometemplate\sequences\NC_005100_chr1.gbk#0	282763074	NC_005100.4	+	41410	201981362..202022771	25618, 2013		Acadsb
Wdr11	2.02	2.472	0.612	2.584	1.22354	0.956756	0.236711	0.781957	Z-002928	Wdr11	gene		D:\assemblies\Rattus_norvegicus-Rnor_6.0-dbSNP149\Rattus_norvegicus-Rnor_6.0-dbSNP149.genometemplate\sequences\NC_005100_chr1.gbk#0	282763074	NC_005100.4	+	45527	202770810..202816336	309016, 1587347		Wdr11
LOC103691248	0.001	0.004	0.098	0.001	4.25926	4.25926	103.227	1	Z-002941	LOC103691248	gene		D:\assemblies\Rattus_norvegicus-Rnor_6.0-dbSNP149\Rattus_norvegicus-Rnor_6.0-dbSNP149.genometemplate\sequences\NC_005100_chr1.gbk#0	282763074	NC_005100.4	-	15097	204345009..204329913	103691248, 9095710		LOC103691248
Oat	28.292	50.415	6.567	38.843	1.78196	1.29791	0.169064	0.728363	Z-002943	Oat	gene		D:\assemblies\Rattus_norvegicus-Rnor_6.0-dbSNP149\Rattus_norvegicus-Rnor_6.0-dbSNP149.genometemplate\sequences\NC_005100_chr1.gbk#0	282763074	NC_005100.4	-	19782	204582070..204562289	64313, 621724		Oat	rOAT
Fam175b	3.458	4.337	0.777	3.173	1.25425	1.36699	0.245001	1.08989	Z-002949	Fam175b	gene		D:\assemblies\Rattus_norvegicus-Rnor_6.0-dbSNP149\Rattus_norvegicus-Rnor_6.0-dbSNP149.genometemplate\sequences\NC_005100_chr1.gbk#0	282763074	NC_005100.4	+	25577	204861768..204887344	293570, 1308918		Fam175b	RGD1308918
Foxi2	0.87	0.677	0.001	1.37	0.777971	0.494421	0.000690024	0.635526	Z-002979	Foxi2	gene		D:\assemblies\Rattus_norvegicus-Rnor_6.0-dbSNP149\Rattus_norvegicus-Rnor_6.0-dbSNP149.genometemplate\sequences\NC_005100_chr1.gbk#0	282763074	NC_005100.4	+	3128	207653704..207656831	246073, 621739		Foxi2
Ebf3	13.799	13.478	0.811	16.101	0.976719	0.837117	0.0503636	0.85707	Z-002995	Ebf3	gene		D:\assemblies\Rattus_norvegicus-Rnor_6.0-dbSNP149\Rattus_norvegicus-Rnor_6.0-dbSNP149.genometemplate\sequences\NC_005100_chr1.gbk#0	282763074	NC_005100.4	-	117991	209641143..209523153	361668, 1304956		Ebf3
Tcerg1l	0.001	0.001	0.768	0.001	1	1	812.961	1	Z-003002	Tcerg1l	gene		D:\assemblies\Rattus_norvegicus-Rnor_6.0-dbSNP149\Rattus_norvegicus-Rnor_6.0-dbSNP149.genometemplate\sequences\NC_005100_chr1.gbk#0	282763074	NC_005100.4	-	188933	210739600..210550668	361669, 1562437		Tcerg1l	RGD1562437
Mapk1ip1	1.85	1.997	75.138	2.079	1.0791	0.960365	36.1385	0.889969	Z-003003	Mapk1ip1	gene		D:\assemblies\Rattus_norvegicus-Rnor_6.0-dbSNP149\Rattus_norvegicus-Rnor_6.0-dbSNP149.genometemplate\sequences\NC_005100_chr1.gbk#0	282763074	NC_005100.4	-	10333	211205772..211195440	499280, 1565431		Mapk1ip1	RGD1565431
Lrrc27	0.005	0.011	0.073	0.001	2.25685	11.8895	77.6572	5.26815	Z-003011	Lrrc27	gene		D:\assemblies\Rattus_norvegicus-Rnor_6.0-dbSNP149\Rattus_norvegicus-Rnor_6.0-dbSNP149.genometemplate\sequences\NC_005100_chr1.gbk#0	282763074	NC_005100.4	+	32073	211543751..211575823	499281, 1559981		Lrrc27	RGD1559981
Inpp5a	13.963	26.792	1.311	12.841	1.91873	2.08651	0.102121	1.08744	Z-003015	Inpp5a	gene		D:\assemblies\Rattus_norvegicus-Rnor_6.0-dbSNP149\Rattus_norvegicus-Rnor_6.0-dbSNP149.genometemplate\sequences\NC_005100_chr1.gbk#0	282763074	NC_005100.4	+	188682	211732163..211920844	365382, 1306168		Inpp5a
Msx3	0.092	0.107	0.001	0.474	1.17298	0.226473	0.00199301	0.193074	Z-003030	Msx3	gene		D:\assemblies\Rattus_norvegicus-Rnor_6.0-dbSNP149\Rattus_norvegicus-Rnor_6.0-dbSNP149.genometemplate\sequences\NC_005100_chr1.gbk#0	282763074	NC_005100.4	-	2929	212517151..212514223	114504, 620932		Msx3
Cd163l1	0.001	0.006	0.184	0.001	6.0644	6.0644	194.811	1	Z-003042	Cd163l1	gene		D:\assemblies\Rattus_norvegicus-Rnor_6.0-dbSNP149\Rattus_norvegicus-Rnor_6.0-dbSNP149.genometemplate\sequences\NC_005100_chr1.gbk#0	282763074	NC_005100.4	+	11252	212695735..212706986	293591, 1307378		Cd163l1	RGD1307378
Cyp2e1	0.001	0.005	0.089	0.001	5.58746	5.58746	94.4137	1	Z-003064	Cyp2e1	gene		D:\assemblies\Rattus_norvegicus-Rnor_6.0-dbSNP149\Rattus_norvegicus-Rnor_6.0-dbSNP149.genometemplate\sequences\NC_005100_chr1.gbk#0	282763074	NC_005100.4	+	10304	213511892..213522195	25086, 2475		Cyp2e1	Cyp2e
LOC108348167	0.001	0.001	0.055	0.001	1	1	58.2435	1	Z-003076	LOC108348167	gene		D:\assemblies\Rattus_norvegicus-Rnor_6.0-dbSNP149\Rattus_norvegicus-Rnor_6.0-dbSNP149.genometemplate\sequences\NC_005100_chr1.gbk#0	282763074	NC_005100.4	+	7296	213685384..213692679	108348167		LOC108348167
Ifitm1	27.715	70.103	372.701	43.287	2.52941	1.6195	8.61003	0.640268	Z-003082	Ifitm1	gene		D:\assemblies\Rattus_norvegicus-Rnor_6.0-dbSNP149\Rattus_norvegicus-Rnor_6.0-dbSNP149.genometemplate\sequences\NC_005100_chr1.gbk#0	282763074	NC_005100.4	+	2017	213765825..213767841	293618, 1307601		Ifitm1
Ifitm6	27.259	95.183	0.488	40.927	3.49182	2.32571	0.0119327	0.666045	Z-003084	Ifitm6	gene		D:\assemblies\Rattus_norvegicus-Rnor_6.0-dbSNP149\Rattus_norvegicus-Rnor_6.0-dbSNP149.genometemplate\sequences\NC_005100_chr1.gbk#0	282763074	NC_005100.4	-	39605	213856570..213816966	309104, 1304718		Ifitm6
B4galnt4	0.001	0.004	0.511	0.001	4.368	4.368	540.497	1	Z-003085	B4galnt4	gene		D:\assemblies\Rattus_norvegicus-Rnor_6.0-dbSNP149\Rattus_norvegicus-Rnor_6.0-dbSNP149.genometemplate\sequences\NC_005100_chr1.gbk#0	282763074	NC_005100.4	+	10906	213870328..213881233	309105, 1310052		B4galnt4	RGD1310052
Sigirr	0.818	3.422	16.848	0.859	4.18366	3.98501	19.6195	0.952517	Z-003087	Sigirr	gene		D:\assemblies\Rattus_norvegicus-Rnor_6.0-dbSNP149\Rattus_norvegicus-Rnor_6.0-dbSNP149.genometemplate\sequences\NC_005100_chr1.gbk#0	282763074	NC_005100.4	-	9303	213907697..213898395	309106, 1306732		Sigirr	RGD1306732
Ano9	0.001	0.028	0.251	0.001	29.3622	29.3622	265.178	1	Z-003088	Ano9	gene		D:\assemblies\Rattus_norvegicus-Rnor_6.0-dbSNP149\Rattus_norvegicus-Rnor_6.0-dbSNP149.genometemplate\sequences\NC_005100_chr1.gbk#0	282763074	NC_005100.4	-	20903	213929291..213908389	499287, 1560565		Ano9
LOC100911575	125.505	343.274	1196.27	163.695	2.73515	2.09703	7.30791	0.766698	Z-003094	LOC100911575	gene		D:\assemblies\Rattus_norvegicus-Rnor_6.0-dbSNP149\Rattus_norvegicus-Rnor_6.0-dbSNP149.genometemplate\sequences\NC_005100_chr1.gbk#0	282763074	NC_005100.4	+	2507	213991139..213993645	100911575, 6491911		LOC100911575
Lmntd2	0.001	0.001	0.186	0.001	1	1	197.163	1	Z-003105	Lmntd2	gene		D:\assemblies\Rattus_norvegicus-Rnor_6.0-dbSNP149\Rattus_norvegicus-Rnor_6.0-dbSNP149.genometemplate\sequences\NC_005100_chr1.gbk#0	282763074	NC_005100.4	-	5703	214202828..214197126	309108, 1307439		Lmntd2	RGD1307439
Phrf1	2.88	2.714	14.476	3.277	0.942123	0.828033	4.41681	0.878901	Z-003110	Phrf1	gene		D:\assemblies\Rattus_norvegicus-Rnor_6.0-dbSNP149\Rattus_norvegicus-Rnor_6.0-dbSNP149.genometemplate\sequences\NC_005100_chr1.gbk#0	282763074	NC_005100.4	+	33234	214215673..214248906	245925, 708360		Phrf1
Irf7	50.408	101.584	11.442	72.844	2.01522	1.39454	0.157077	0.692001	Z-003111	Irf7	gene		D:\assemblies\Rattus_norvegicus-Rnor_6.0-dbSNP149\Rattus_norvegicus-Rnor_6.0-dbSNP149.genometemplate\sequences\NC_005100_chr1.gbk#0	282763074	NC_005100.4	-	3522	214252909..214249388	293624, 1307828		Irf7
Deaf1	3.419	14.091	28.579	5.774	4.12177	2.44035	4.94965	0.592063	Z-003115	Deaf1	gene		D:\assemblies\Rattus_norvegicus-Rnor_6.0-dbSNP149\Rattus_norvegicus-Rnor_6.0-dbSNP149.genometemplate\sequences\NC_005100_chr1.gbk#0	282763074	NC_005100.4	-	33680	214317466..214283787	83632, 620671		Deaf1	NUDR
Rplp2	125.505	343.274	1196.27	163.695	2.73515	2.09703	7.30791	0.766698	Z-003123	Rplp2	gene		D:\assemblies\Rattus_norvegicus-Rnor_6.0-dbSNP149\Rattus_norvegicus-Rnor_6.0-dbSNP149.genometemplate\sequences\NC_005100_chr1.gbk#0	282763074	NC_005100.4	+	2272	214428280..214430551	140662, 621775		Rplp2	RP2
Muc6	0.003	0.122	4.023	0.003	43.7912	36.8776	1213.63	0.842123	Z-003131	Muc6	gene		D:\assemblies\Rattus_norvegicus-Rnor_6.0-dbSNP149\Rattus_norvegicus-Rnor_6.0-dbSNP149.genometemplate\sequences\NC_005100_chr1.gbk#0	282763074	NC_005100.4	-	22072	214630524..214608453	282586, 628826		Muc6
Muc2	0.001	0.003	0.157	0.001	3.607	3.607	166.001	1	Z-003132	Muc2	gene		D:\assemblies\Rattus_norvegicus-Rnor_6.0-dbSNP149\Rattus_norvegicus-Rnor_6.0-dbSNP149.genometemplate\sequences\NC_005100_chr1.gbk#0	282763074	NC_005100.4	+	29269	214663929..214693197	24572, 3123		Muc2
Cttn	7.246	10.101	0.686	7.436	1.394	1.35844	0.0921983	0.97449	Z-003145	Cttn	gene		D:\assemblies\Rattus_norvegicus-Rnor_6.0-dbSNP149\Rattus_norvegicus-Rnor_6.0-dbSNP149.genometemplate\sequences\NC_005100_chr1.gbk#0	282763074	NC_005100.4	-	35498	215290882..215255385	60465, 619839		Cttn
Cttn	7.246	10.101	0.686	7.436	1.394	1.35844	0.0921983	0.97449	Z-003146	Cttn [2]	gene		D:\assemblies\Rattus_norvegicus-Rnor_6.0-dbSNP149\Rattus_norvegicus-Rnor_6.0-dbSNP149.genometemplate\sequences\NC_005100_chr1.gbk#0	282763074	NC_005100.4	-	35499	217638196..217602698	60465, 619839		Cttn	Cttnb
Lsp1	27.295	54.448	164.311	31.619	1.99482	1.72202	5.19661	0.863246	Z-003155	Lsp1	gene		D:\assemblies\Rattus_norvegicus-Rnor_6.0-dbSNP149\Rattus_norvegicus-Rnor_6.0-dbSNP149.genometemplate\sequences\NC_005100_chr1.gbk#0	282763074	NC_005100.4	+	33756	215628750..215662505	361680, 1306133		Lsp1
Prr33	0.001	0.006	0.247	0.001	6.22254	6.22254	261.42	1	Z-003156	Prr33	gene		D:\assemblies\Rattus_norvegicus-Rnor_6.0-dbSNP149\Rattus_norvegicus-Rnor_6.0-dbSNP149.genometemplate\sequences\NC_005100_chr1.gbk#0	282763074	NC_005100.4	-	7517	215666512..215658996	685580, 1592568		Prr33
H19	1.903	3.361	0.057	3.832	1.76617	0.877227	0.0148433	0.496682	Z-003159	H19	gene		D:\assemblies\Rattus_norvegicus-Rnor_6.0-dbSNP149\Rattus_norvegicus-Rnor_6.0-dbSNP149.genometemplate\sequences\NC_005100_chr1.gbk#0	282763074	NC_005100.4	-	2677	215747080..215744404	309122, 2775		H19	ASM, ASM1, D11S813E
Igf2	3.761	0.298	0.001	6.748	0.0791325	0.0441045	0.000140061	0.55735	Z-003163	Igf2	gene		D:\assemblies\Rattus_norvegicus-Rnor_6.0-dbSNP149\Rattus_norvegicus-Rnor_6.0-dbSNP149.genometemplate\sequences\NC_005100_chr1.gbk#0	282763074	NC_005100.4	-	10980	215839081..215828102	24483, 2870		Igf2	IGFII, RNIGF2
LOC102549750	0.1	0.47	0.49	0.092	4.71056	5.11387	5.33311	1.08562	Z-003168	LOC102549750	gene		D:\assemblies\Rattus_norvegicus-Rnor_6.0-dbSNP149\Rattus_norvegicus-Rnor_6.0-dbSNP149.genometemplate\sequences\NC_005100_chr1.gbk#0	282763074	NC_005100.4	-	58803	215939811..215881009	102549750, 7585225		LOC102549750
LOC102549619	0.263	0.309	3.087	0.181	1.17379	1.702	17.0143	1.45001	Z-003169	LOC102549619	gene		D:\assemblies\Rattus_norvegicus-Rnor_6.0-dbSNP149\Rattus_norvegicus-Rnor_6.0-dbSNP149.genometemplate\sequences\NC_005100_chr1.gbk#0	282763074	NC_005100.4	-	46807	215986772..215939966	102549619, 7640573		LOC102549619
Tspan32	0.08	2.093	15.127	0.591	26.3039	3.54061	25.585	0.134604	Z-003173	Tspan32	gene		D:\assemblies\Rattus_norvegicus-Rnor_6.0-dbSNP149\Rattus_norvegicus-Rnor_6.0-dbSNP149.genometemplate\sequences\NC_005100_chr1.gbk#0	282763074	NC_005100.4	+	16668	216189535..216206202	365390, 1308721		Tspan32
Tssc4	4.024	8.835	27.123	5.338	2.19558	1.65512	5.08099	0.75384	Z-003175	Tssc4	gene		D:\assemblies\Rattus_norvegicus-Rnor_6.0-dbSNP149\Rattus_norvegicus-Rnor_6.0-dbSNP149.genometemplate\sequences\NC_005100_chr1.gbk#0	282763074	NC_005100.4	+	2825	216253786..216256610	361682, 1307043		Tssc4
Cdkn1c	16.36	24.23	0.427	20.439	1.481	1.18544	0.0208859	0.800429	Z-003178	Cdkn1c	gene		D:\assemblies\Rattus_norvegicus-Rnor_6.0-dbSNP149\Rattus_norvegicus-Rnor_6.0-dbSNP149.genometemplate\sequences\NC_005100_chr1.gbk#0	282763074	NC_005100.4	-	2725	216663791..216661067	246060, 727892		Cdkn1c	Kip2, p57, p57KIP2
Tcirg1	2.832	3.649	23.379	3.379	1.28865	1.07987	6.91848	0.837989	Z-003254	Tcirg1	gene		D:\assemblies\Rattus_norvegicus-Rnor_6.0-dbSNP149\Rattus_norvegicus-Rnor_6.0-dbSNP149.genometemplate\sequences\NC_005100_chr1.gbk#0	282763074	NC_005100.4	-	12780	219139466..219126687	293650, 735136		Tcirg1	OC116, TIRC7
Aldh3b1	4.215	6.518	1.181	5.377	1.54618	1.21218	0.21967	0.783981	Z-003256	Aldh3b1	gene		D:\assemblies\Rattus_norvegicus-Rnor_6.0-dbSNP149\Rattus_norvegicus-Rnor_6.0-dbSNP149.genometemplate\sequences\NC_005100_chr1.gbk#0	282763074	NC_005100.4	-	36080	219181536..219145457	309147, 1359546		Aldh3b1
LOC103691273	0.001	0.001	1.367	0.001	1	1	1446.38	1	Z-003262	LOC103691273	gene		D:\assemblies\Rattus_norvegicus-Rnor_6.0-dbSNP149\Rattus_norvegicus-Rnor_6.0-dbSNP149.genometemplate\sequences\NC_005100_chr1.gbk#0	282763074	NC_005100.4	-	714	219247276..219246563	103691273, 9288417		LOC103691273
Nudt8	1.822	6.01	25.625	2.536	3.29851	2.36958	10.1029	0.71838	Z-003263	Nudt8	gene		D:\assemblies\Rattus_norvegicus-Rnor_6.0-dbSNP149\Rattus_norvegicus-Rnor_6.0-dbSNP149.genometemplate\sequences\NC_005100_chr1.gbk#0	282763074	NC_005100.4	+	1728	219247428..219249155	361692, 1309040		Nudt8
Doc2g	0.001	0.001	5.36	0.001	1	1	5670.81	1	Z-003264	Doc2g	gene		D:\assemblies\Rattus_norvegicus-Rnor_6.0-dbSNP149\Rattus_norvegicus-Rnor_6.0-dbSNP149.genometemplate\sequences\NC_005100_chr1.gbk#0	282763074	NC_005100.4	+	4538	219249253..219253790	293654, 1307473		Doc2g	Doc2gp
RGD1307603	0.007	0.001	7.602	0.001	0.14219	1	8042.97	7.03286	Z-003267	RGD1307603	gene		D:\assemblies\Rattus_norvegicus-Rnor_6.0-dbSNP149\Rattus_norvegicus-Rnor_6.0-dbSNP149.genometemplate\sequences\NC_005100_chr1.gbk#0	282763074	NC_005100.4	-	2648	219312240..219309593	293656, 1307603		RGD1307603
LOC108349682	39.052	111.302	269.517	45.488	2.8501	2.44687	5.92508	0.85852	Z-003276	LOC108349682	gene		D:\assemblies\Rattus_norvegicus-Rnor_6.0-dbSNP149\Rattus_norvegicus-Rnor_6.0-dbSNP149.genometemplate\sequences\NC_005100_chr1.gbk#0	282763074	NC_005100.4	-	470	219395704..219395235	108349682		LOC108349682
Ptprcap	4.513	7.915	567.099	1.821	1.75387	4.3471	311.457	2.47858	Z-003278	Ptprcap	gene		D:\assemblies\Rattus_norvegicus-Rnor_6.0-dbSNP149\Rattus_norvegicus-Rnor_6.0-dbSNP149.genometemplate\sequences\NC_005100_chr1.gbk#0	282763074	NC_005100.4	+	2160	219403970..219406129	499300, 1559601		Ptprcap
Rps6kb2	3.007	5.626	41.731	3.806	1.87104	1.47826	10.9647	0.790074	Z-003279	Rps6kb2	gene		D:\assemblies\Rattus_norvegicus-Rnor_6.0-dbSNP149\Rattus_norvegicus-Rnor_6.0-dbSNP149.genometemplate\sequences\NC_005100_chr1.gbk#0	282763074	NC_005100.4	-	6688	219412888..219406201	361696, 1305144		Rps6kb2
Tbc1d10c	1.066	2.984	21.858	3.116	2.79833	0.957606	7.01555	0.342207	Z-003281	Tbc1d10c	gene		D:\assemblies\Rattus_norvegicus-Rnor_6.0-dbSNP149\Rattus_norvegicus-Rnor_6.0-dbSNP149.genometemplate\sequences\NC_005100_chr1.gbk#0	282763074	NC_005100.4	-	8009	219439102..219431094	361697, 1311490		Tbc1d10c	RGD1311490
Ankrd13d	0.383	0.778	13.954	0.377	2.03413	2.06385	37.0061	1.01461	Z-003288	Ankrd13d	gene		D:\assemblies\Rattus_norvegicus-Rnor_6.0-dbSNP149\Rattus_norvegicus-Rnor_6.0-dbSNP149.genometemplate\sequences\NC_005100_chr1.gbk#0	282763074	NC_005100.4	-	12403	219532718..219520316	361699, 1309156		Ankrd13d	RGD1309156
Syt12	0.004	0.06	0.001	0.332	13.6884	0.180739	0.00284464	0.0132038	Z-003292	Syt12	gene		D:\assemblies\Rattus_norvegicus-Rnor_6.0-dbSNP149\Rattus_norvegicus-Rnor_6.0-dbSNP149.genometemplate\sequences\NC_005100_chr1.gbk#0	282763074	NC_005100.4	-	29347	219719359..219690013	191595, 621876		Syt12	Srg1
Sptbn2	0.002	0.014	0.016	0.001	6.18834	14.7573	16.7246	2.3847	Z-003299	Sptbn2	gene		D:\assemblies\Rattus_norvegicus-Rnor_6.0-dbSNP149\Rattus_norvegicus-Rnor_6.0-dbSNP149.genometemplate\sequences\NC_005100_chr1.gbk#0	282763074	NC_005100.4	+	42383	219964429..220006811	29211, 3751		Sptbn2	Spnb3
LOC103691276	2.243	3.835	19.096	1.924	1.70923	1.99255	9.92256	1.16576	Z-003316	LOC103691276	gene		D:\assemblies\Rattus_norvegicus-Rnor_6.0-dbSNP149\Rattus_norvegicus-Rnor_6.0-dbSNP149.genometemplate\sequences\NC_005100_chr1.gbk#0	282763074	NC_005100.4	-	3959	220338245..220334287	103691276, 9473660		LOC103691276
LOC102554272	0.268	2.058	0.05	0.728	7.6767	2.82556	0.0685043	0.36807	Z-003319	LOC102554272	gene		D:\assemblies\Rattus_norvegicus-Rnor_6.0-dbSNP149\Rattus_norvegicus-Rnor_6.0-dbSNP149.genometemplate\sequences\NC_005100_chr1.gbk#0	282763074	NC_005100.4	+	4409	220356873..220361281	102554272, 7597324		LOC102554272
LOC102554421	0.268	2.058	0.05	0.728	7.6767	2.82556	0.0685043	0.36807	Z-003321	LOC102554421	gene		D:\assemblies\Rattus_norvegicus-Rnor_6.0-dbSNP149\Rattus_norvegicus-Rnor_6.0-dbSNP149.genometemplate\sequences\NC_005100_chr1.gbk#0	282763074	NC_005100.4	+	4409	220365581..220369989	102554421, 7722047		LOC102554421
LOC103691277	2.243	3.835	19.096	1.924	1.70923	1.99255	9.92256	1.16576	Z-003327	LOC103691277	gene		D:\assemblies\Rattus_norvegicus-Rnor_6.0-dbSNP149\Rattus_norvegicus-Rnor_6.0-dbSNP149.genometemplate\sequences\NC_005100_chr1.gbk#0	282763074	NC_005100.4	-	3959	220431409..220427451	103691277, 9349162		LOC103691277
LOC102554466	0.268	2.058	0.05	0.728	7.6767	2.82556	0.0685043	0.36807	Z-003330	LOC102554466	gene		D:\assemblies\Rattus_norvegicus-Rnor_6.0-dbSNP149\Rattus_norvegicus-Rnor_6.0-dbSNP149.genometemplate\sequences\NC_005100_chr1.gbk#0	282763074	NC_005100.4	+	4410	220449990..220454399	102554466, 7694107		LOC102554466
LOC102555167	11.923	27.06	4.054	16.261	2.26963	1.66408	0.249281	0.733196	Z-003334	LOC102555167	gene		D:\assemblies\Rattus_norvegicus-Rnor_6.0-dbSNP149\Rattus_norvegicus-Rnor_6.0-dbSNP149.genometemplate\sequences\NC_005100_chr1.gbk#0	282763074	NC_005100.4	-	10629	220491456..220480828	102555167, 7593353		LOC102555167
Rab1b	11.923	27.06	4.054	16.261	2.26963	1.66408	0.249281	0.733196	Z-003335	Rab1b	gene		D:\assemblies\Rattus_norvegicus-Rnor_6.0-dbSNP149\Rattus_norvegicus-Rnor_6.0-dbSNP149.genometemplate\sequences\NC_005100_chr1.gbk#0	282763074	NC_005100.4	-	7941	220491469..220483529	100126191, 1642882		Rab1b	Rab1bl
LOC103691278	0.001	0.008	1.998	0.001	8.74165	8.74165	2114.38	1	Z-003344	LOC103691278	gene		D:\assemblies\Rattus_norvegicus-Rnor_6.0-dbSNP149\Rattus_norvegicus-Rnor_6.0-dbSNP149.genometemplate\sequences\NC_005100_chr1.gbk#0	282763074	NC_005100.4	-	2880	220761316..220758437	103691278, 9257852		LOC103691278
Sart1	8.258	14.825	61.751	9.476	1.7951	1.56446	6.51657	0.871513	Z-003345	Sart1	gene		D:\assemblies\Rattus_norvegicus-Rnor_6.0-dbSNP149\Rattus_norvegicus-Rnor_6.0-dbSNP149.genometemplate\sequences\NC_005100_chr1.gbk#0	282763074	NC_005100.4	-	8663	220771158..220762496	29678, 61930		Sart1
Drap1	30.387	76.502	226.882	39.169	2.51757	1.9531	5.79233	0.775789	Z-003348	Drap1	gene		D:\assemblies\Rattus_norvegicus-Rnor_6.0-dbSNP149\Rattus_norvegicus-Rnor_6.0-dbSNP149.genometemplate\sequences\NC_005100_chr1.gbk#0	282763074	NC_005100.4	-	2698	220806480..220803783	293674, 1308477		Drap1
Ctsw	0.081	0.082	74.188	0.362	1.01512	0.227085	204.714	0.223703	Z-003353	Ctsw	gene		D:\assemblies\Rattus_norvegicus-Rnor_6.0-dbSNP149\Rattus_norvegicus-Rnor_6.0-dbSNP149.genometemplate\sequences\NC_005100_chr1.gbk#0	282763074	NC_005100.4	-	3389	220847967..220844579	293676, 1309354		Ctsw
Sipa1	4.964	7.054	51.633	5.097	1.42107	1.38401	10.1308	0.973922	Z-003365	Sipa1	gene		D:\assemblies\Rattus_norvegicus-Rnor_6.0-dbSNP149\Rattus_norvegicus-Rnor_6.0-dbSNP149.genometemplate\sequences\NC_005100_chr1.gbk#0	282763074	NC_005100.4	-	12516	221018820..221006305	361710, 1303184		Sipa1	Spa1
Slc22a20	0.005	0.05	0.1	0.001	9.0756	52.5661	105.499	5.79203	Z-003382	Slc22a20	gene		D:\assemblies\Rattus_norvegicus-Rnor_6.0-dbSNP149\Rattus_norvegicus-Rnor_6.0-dbSNP149.genometemplate\sequences\NC_005100_chr1.gbk#0	282763074	NC_005100.4	-	16760	221344367..221327608	293686, 1311460		Slc22a20	Gm963
Fau	442.545	1203.29	2522.47	608.457	2.71902	1.97761	4.14569	0.727323	Z-003387	Fau	gene		D:\assemblies\Rattus_norvegicus-Rnor_6.0-dbSNP149\Rattus_norvegicus-Rnor_6.0-dbSNP149.genometemplate\sequences\NC_005100_chr1.gbk#0	282763074	NC_005100.4	+	1516	221420312..221421827	29752, 61938		Fau
Cdc42bpg	4.578	6.538	0.4	5.306	1.42814	1.23214	0.0753004	0.862756	Z-003406	Cdc42bpg	gene		D:\assemblies\Rattus_norvegicus-Rnor_6.0-dbSNP149\Rattus_norvegicus-Rnor_6.0-dbSNP149.genometemplate\sequences\NC_005100_chr1.gbk#0	282763074	NC_005100.4	+	20185	221673334..221693518	293693, 1307260		Cdc42bpg	RGD1307260
LOC108349687	1.109	3.601	33.42	2.543	3.24597	1.41616	13.1439	0.436282	Z-003409	LOC108349687	gene		D:\assemblies\Rattus_norvegicus-Rnor_6.0-dbSNP149\Rattus_norvegicus-Rnor_6.0-dbSNP149.genometemplate\sequences\NC_005100_chr1.gbk#0	282763074	NC_005100.4	-	9589	221735365..221725777	108349687		LOC108349687
Ccdc88b	1.051	1.56	56.559	1.757	1.48422	0.887921	32.1946	0.598241	Z-003416	Ccdc88b	gene		D:\assemblies\Rattus_norvegicus-Rnor_6.0-dbSNP149\Rattus_norvegicus-Rnor_6.0-dbSNP149.genometemplate\sequences\NC_005100_chr1.gbk#0	282763074	NC_005100.4	-	16050	222118485..222102436	293698, 1311475		Ccdc88b
Fkbp2	10.498	32.913	86.757	18.214	3.13508	1.807	4.76316	0.57638	Z-003426	Fkbp2	gene		D:\assemblies\Rattus_norvegicus-Rnor_6.0-dbSNP149\Rattus_norvegicus-Rnor_6.0-dbSNP149.genometemplate\sequences\NC_005100_chr1.gbk#0	282763074	NC_005100.4	-	2765	222235113..222232349	293702, 1560660		Fkbp2	RGD1560660
Dnajc4	3.916	7.018	18.146	3.286	1.79213	2.13572	5.52223	1.19172	Z-003428	Dnajc4	gene		D:\assemblies\Rattus_norvegicus-Rnor_6.0-dbSNP149\Rattus_norvegicus-Rnor_6.0-dbSNP149.genometemplate\sequences\NC_005100_chr1.gbk#0	282763074	NC_005100.4	-	4227	222247115..222242889	361717, 1308693		Dnajc4
Nudt22	1.444	5.92	17.641	2.812	4.09841	2.10506	6.27343	0.513629	Z-003429	Nudt22	gene		D:\assemblies\Rattus_norvegicus-Rnor_6.0-dbSNP149\Rattus_norvegicus-Rnor_6.0-dbSNP149.genometemplate\sequences\NC_005100_chr1.gbk#0	282763074	NC_005100.4	-	3554	222251053..222247500	293703, 735224		Nudt22
LOC108349688	0.001	0.008	0.073	0.001	8.22699	8.22699	77.2074	1	Z-003435	LOC108349688	gene		D:\assemblies\Rattus_norvegicus-Rnor_6.0-dbSNP149\Rattus_norvegicus-Rnor_6.0-dbSNP149.genometemplate\sequences\NC_005100_chr1.gbk#0	282763074	NC_005100.4	-	6324	222438058..222431735	108349688		LOC108349688
Naa40	2.108	0.346	0.659	3.107	0.164319	0.111495	0.212049	0.67853	Z-003438	Naa40	gene		D:\assemblies\Rattus_norvegicus-Rnor_6.0-dbSNP149\Rattus_norvegicus-Rnor_6.0-dbSNP149.genometemplate\sequences\NC_005100_chr1.gbk#0	282763074	NC_005100.4	-	17362	222495382..222478021	361718, 1565838		Naa40	Nat11, RGD1565838
RGD1560108	1.149	0.224	0.411	1.734	0.195339	0.129414	0.237096	0.662511	Z-003442	RGD1560108	gene		D:\assemblies\Rattus_norvegicus-Rnor_6.0-dbSNP149\Rattus_norvegicus-Rnor_6.0-dbSNP149.genometemplate\sequences\NC_005100_chr1.gbk#0	282763074	NC_005100.4	+	7731	222669642..222677372	499309, 1560108		RGD1560108
Pla2g16	18.563	37.031	199.542	22.595	1.99481	1.6389	8.83134	0.821582	Z-003446	Pla2g16	gene		D:\assemblies\Rattus_norvegicus-Rnor_6.0-dbSNP149\Rattus_norvegicus-Rnor_6.0-dbSNP149.genometemplate\sequences\NC_005100_chr1.gbk#0	282763074	NC_005100.4	+	32943	222844238..222877180	24913, 2829		Pla2g16	Hrasls3, Hrev107, HRSL3
Wdr74	3.365	9.655	37.641	7.393	2.86937	1.30599	5.09125	0.455148	Z-003461	Wdr74	gene		D:\assemblies\Rattus_norvegicus-Rnor_6.0-dbSNP149\Rattus_norvegicus-Rnor_6.0-dbSNP149.genometemplate\sequences\NC_005100_chr1.gbk#0	282763074	NC_005100.4	+	4754	224933906..224938659	690229, 1582881		Wdr74
Nxf1	8.321	15.034	62.51	10.473	1.80688	1.43546	5.96842	0.794441	Z-003463	Nxf1	gene		D:\assemblies\Rattus_norvegicus-Rnor_6.0-dbSNP149\Rattus_norvegicus-Rnor_6.0-dbSNP149.genometemplate\sequences\NC_005100_chr1.gbk#0	282763074	NC_005100.4	+	13194	224957535..224970728	59087, 62014		Nxf1	Mex67h, Tap
Tmem179b	7.371	9.161	29.291	5.176	1.24283	1.76999	5.65902	1.42416	Z-003465	Tmem179b	gene		D:\assemblies\Rattus_norvegicus-Rnor_6.0-dbSNP149\Rattus_norvegicus-Rnor_6.0-dbSNP149.genometemplate\sequences\NC_005100_chr1.gbk#0	282763074	NC_005100.4	-	2874	224975091..224972218	690263, 1582850		Tmem179b
Lbhd1	17.292	31.234	103.318	17.738	1.80624	1.76089	5.82479	0.974891	Z-003476	Lbhd1	gene		D:\assemblies\Rattus_norvegicus-Rnor_6.0-dbSNP149\Rattus_norvegicus-Rnor_6.0-dbSNP149.genometemplate\sequences\NC_005100_chr1.gbk#0	282763074	NC_005100.4	+	7109	225080183..225087291	690349, 1597339		Lbhd1	RGD1304652
LOC102551607	0.001	0.001	0.199	0.001	1	1	210.196	1	Z-003477	LOC102551607	gene		D:\assemblies\Rattus_norvegicus-Rnor_6.0-dbSNP149\Rattus_norvegicus-Rnor_6.0-dbSNP149.genometemplate\sequences\NC_005100_chr1.gbk#0	282763074	NC_005100.4	-	1201	225092429..225091229	102551607, 7587874		LOC102551607
Asrgl1	5.51	10.305	0.672	4.944	1.87019	2.0842	0.13591	1.11443	Z-003489	Asrgl1	gene		D:\assemblies\Rattus_norvegicus-Rnor_6.0-dbSNP149\Rattus_norvegicus-Rnor_6.0-dbSNP149.genometemplate\sequences\NC_005100_chr1.gbk#0	282763074	NC_005100.4	-	20007	225329743..225309737	246307, 708526		Asrgl1	Gliap, Hiob2
Rab3il1	13.686	24.215	2.044	20.935	1.76937	1.15665	0.0976337	0.653708	Z-003501	Rab3il1	gene		D:\assemblies\Rattus_norvegicus-Rnor_6.0-dbSNP149\Rattus_norvegicus-Rnor_6.0-dbSNP149.genometemplate\sequences\NC_005100_chr1.gbk#0	282763074	NC_005100.4	+	7649	226077182..226084830	171452, 619764		Rab3il1	Grab
Tmem258	17.705	43.881	106.591	18.627	2.47844	2.35578	5.72244	0.950509	Z-003505	Tmem258	gene		D:\assemblies\Rattus_norvegicus-Rnor_6.0-dbSNP149\Rattus_norvegicus-Rnor_6.0-dbSNP149.genometemplate\sequences\NC_005100_chr1.gbk#0	282763074	NC_005100.4	+	3865	226256142..226260006	499317, 1560328		Tmem258
Ppp1r32	0.001	0.004	0.704	0.001	4.65919	4.65919	744.699	1	Z-003513	Ppp1r32	gene		D:\assemblies\Rattus_norvegicus-Rnor_6.0-dbSNP149\Rattus_norvegicus-Rnor_6.0-dbSNP149.genometemplate\sequences\NC_005100_chr1.gbk#0	282763074	NC_005100.4	-	9499	226527903..226518405	252958, 708532		Ppp1r32	Iiig9
LOC103691286	0.648	2.325	13.595	0.708	3.58819	3.28202	19.1913	0.914672	Z-003516	LOC103691286	gene		D:\assemblies\Rattus_norvegicus-Rnor_6.0-dbSNP149\Rattus_norvegicus-Rnor_6.0-dbSNP149.genometemplate\sequences\NC_005100_chr1.gbk#0	282763074	NC_005100.4	-	3686	226599720..226596035	103691286, 9312765		LOC103691286
Cd5	0.037	0.293	33.042	0.144	7.96291	2.03209	229.347	0.255194	Z-003525	Cd5	gene		D:\assemblies\Rattus_norvegicus-Rnor_6.0-dbSNP149\Rattus_norvegicus-Rnor_6.0-dbSNP149.genometemplate\sequences\NC_005100_chr1.gbk#0	282763074	NC_005100.4	-	20950	226791861..226770912	54236, 2309		Cd5
LOC100910973	73.948	167.859	1462.76	87.253	2.26998	1.92382	16.7645	0.847504	Z-003538	LOC100910973	gene		D:\assemblies\Rattus_norvegicus-Rnor_6.0-dbSNP149\Rattus_norvegicus-Rnor_6.0-dbSNP149.genometemplate\sequences\NC_005100_chr1.gbk#0	282763074	NC_005100.4	-	2909	227113844..227110936	100910973, 6495605		LOC100910973
LOC102557108	0.001	0.001	0.559	0.001	1	1	591.631	1	Z-003540	LOC102557108	gene		D:\assemblies\Rattus_norvegicus-Rnor_6.0-dbSNP149\Rattus_norvegicus-Rnor_6.0-dbSNP149.genometemplate\sequences\NC_005100_chr1.gbk#0	282763074	NC_005100.4	-	164787	227321873..227157087	102557108, 7639871		LOC102557108
Ms4a14	0.004	0.001	0.204	0.001	0.247978	1	215.474	4.03262	Z-003550	Ms4a14	gene		D:\assemblies\Rattus_norvegicus-Rnor_6.0-dbSNP149\Rattus_norvegicus-Rnor_6.0-dbSNP149.genometemplate\sequences\NC_005100_chr1.gbk#0	282763074	NC_005100.4	-	15513	227486953..227471441	293743, 727900		Ms4a14	Sp3111
Ms4a6c	0.115	0.081	15.533	0.987	0.697562	0.0816311	15.7435	0.117023	Z-003554	Ms4a6c	gene		D:\assemblies\Rattus_norvegicus-Rnor_6.0-dbSNP149\Rattus_norvegicus-Rnor_6.0-dbSNP149.genometemplate\sequences\NC_005100_chr1.gbk#0	282763074	NC_005100.4	+	10515	227668494..227679008	690930, 1589849		Ms4a6c
Ms4a2	0.055	0.116	0.001	0.298	2.12302	0.389276	0.00317601	0.18336	Z-003561	Ms4a2	gene		D:\assemblies\Rattus_norvegicus-Rnor_6.0-dbSNP149\Rattus_norvegicus-Rnor_6.0-dbSNP149.genometemplate\sequences\NC_005100_chr1.gbk#0	282763074	NC_005100.4	-	7950	227965312..227957363	25316, 2598		Ms4a2	Fcer1b, FCIGA, Ms4a1
Ms4a3	4.99	26.806	0.001	7.024	5.37218	3.81654	0.000134562	0.710427	Z-003562	Ms4a3	gene		D:\assemblies\Rattus_norvegicus-Rnor_6.0-dbSNP149\Rattus_norvegicus-Rnor_6.0-dbSNP149.genometemplate\sequences\NC_005100_chr1.gbk#0	282763074	NC_005100.4	-	14904	227994210..227979307	293753, 1310598		Ms4a3
Oosp1	0.001	0.007	0.307	0.001	7.46678	7.46678	324.962	1	Z-003564	Oosp1	gene		D:\assemblies\Rattus_norvegicus-Rnor_6.0-dbSNP149\Rattus_norvegicus-Rnor_6.0-dbSNP149.genometemplate\sequences\NC_005100_chr1.gbk#0	282763074	NC_005100.4	-	26539	228058901..228032363	690893, 1590944		Oosp1
Fam111a	2.737	4.394	0.236	5.314	1.6057	0.82696	0.044375	0.515017	Z-003611	Fam111a	gene		D:\assemblies\Rattus_norvegicus-Rnor_6.0-dbSNP149\Rattus_norvegicus-Rnor_6.0-dbSNP149.genometemplate\sequences\NC_005100_chr1.gbk#0	282763074	NC_005100.4	+	15755	229003778..229019532	499322, 1560913		Fam111a	RGD1560913
Trpm6	0.006	0.003	3.135	0.008	0.417793	0.315837	376.619	0.755965	Z-003671	Trpm6	gene		D:\assemblies\Rattus_norvegicus-Rnor_6.0-dbSNP149\Rattus_norvegicus-Rnor_6.0-dbSNP149.genometemplate\sequences\NC_005100_chr1.gbk#0	282763074	NC_005100.4	-	152357	234631264..234478908	293874, 1309942		Trpm6
LOC102554711	0.001	0.027	3.409	0.001	28.5434	28.5434	3606.66	1	Z-003673	LOC102554711	gene		D:\assemblies\Rattus_norvegicus-Rnor_6.0-dbSNP149\Rattus_norvegicus-Rnor_6.0-dbSNP149.genometemplate\sequences\NC_005100_chr1.gbk#0	282763074	NC_005100.4	+	7342	234631999..234639340	102554711, 7668904		LOC102554711
Anxa1	91.615	216.567	18.822	121.804	2.36387	1.77799	0.154527	0.752154	Z-003687	Anxa1	gene		D:\assemblies\Rattus_norvegicus-Rnor_6.0-dbSNP149\Rattus_norvegicus-Rnor_6.0-dbSNP149.genometemplate\sequences\NC_005100_chr1.gbk#0	282763074	NC_005100.4	-	16020	237910002..237893983	25380, 2118		Anxa1	Anx1, p35
Gda	10.8	16.952	1.375	10.78	1.56969	1.57248	0.127564	1.00177	Z-003695	Gda	gene		D:\assemblies\Rattus_norvegicus-Rnor_6.0-dbSNP149\Rattus_norvegicus-Rnor_6.0-dbSNP149.genometemplate\sequences\NC_005100_chr1.gbk#0	282763074	NC_005100.4	-	75122	239057663..238982542	83585, 621617		Gda	Cypin
LOC103691311	0.021	0.03	0.001	0.133	1.45313	0.225914	0.00709924	0.155467	Z-003708	LOC103691311	gene		D:\assemblies\Rattus_norvegicus-Rnor_6.0-dbSNP149\Rattus_norvegicus-Rnor_6.0-dbSNP149.genometemplate\sequences\NC_005100_chr1.gbk#0	282763074	NC_005100.4	-	4108	240764054..240759947	103691311, 9265596		LOC103691311
RGD1560242	0.001	0.006	0.415	0.001	6.13993	6.13993	438.793	1	Z-003713	RGD1560242	gene		D:\assemblies\Rattus_norvegicus-Rnor_6.0-dbSNP149\Rattus_norvegicus-Rnor_6.0-dbSNP149.genometemplate\sequences\NC_005100_chr1.gbk#0	282763074	NC_005100.4	-	122165	241460868..241338704	499334, 1560242		RGD1560242
Tjp2	2.108	2.673	0.243	2.956	1.26828	0.904303	0.0823681	0.713014	Z-003718	Tjp2	gene		D:\assemblies\Rattus_norvegicus-Rnor_6.0-dbSNP149\Rattus_norvegicus-Rnor_6.0-dbSNP149.genometemplate\sequences\NC_005100_chr1.gbk#0	282763074	NC_005100.4	-	138229	242084044..241945816	115769, 619807		Tjp2	ZO-2
Pip5k1b	5.513	14.443	0.371	8.862	2.62004	1.62975	0.0418071	0.622033	Z-003721	Pip5k1b	gene		D:\assemblies\Rattus_norvegicus-Rnor_6.0-dbSNP149\Rattus_norvegicus-Rnor_6.0-dbSNP149.genometemplate\sequences\NC_005100_chr1.gbk#0	282763074	NC_005100.4	-	272786	242441247..242168462	309419, 1310914		Pip5k1b	Pip5k1a
Pgm5	7.281	14.656	0.143	9.446	2.01291	1.55156	0.0151162	0.770807	Z-003724	Pgm5	gene		D:\assemblies\Rattus_norvegicus-Rnor_6.0-dbSNP149\Rattus_norvegicus-Rnor_6.0-dbSNP149.genometemplate\sequences\NC_005100_chr1.gbk#0	282763074	NC_005100.4	-	183247	242765837..242582591	679990, 1307969		Pgm5
Pum3	3.029	7.086	21.915	3.906	2.33898	1.81424	5.61136	0.775652	Z-003750	Pum3	gene		D:\assemblies\Rattus_norvegicus-Rnor_6.0-dbSNP149\Rattus_norvegicus-Rnor_6.0-dbSNP149.genometemplate\sequences\NC_005100_chr1.gbk#0	282763074	NC_005100.4	-	40682	245517081..245476400	499339, 1564753		Pum3
LOC102556263	0.001	0.092	0.017	0.001	97.2155	97.2155	17.8145	1	Z-003756	LOC102556263	gene		D:\assemblies\Rattus_norvegicus-Rnor_6.0-dbSNP149\Rattus_norvegicus-Rnor_6.0-dbSNP149.genometemplate\sequences\NC_005100_chr1.gbk#0	282763074	NC_005100.4	-	13071	246585195..246572125	102556263, 7628278		LOC102556263
LOC102546345	0.016	0.516	2.635	0.076	31.6986	6.83183	34.8625	0.215525	Z-003760	LOC102546345	gene		D:\assemblies\Rattus_norvegicus-Rnor_6.0-dbSNP149\Rattus_norvegicus-Rnor_6.0-dbSNP149.genometemplate\sequences\NC_005100_chr1.gbk#0	282763074	NC_005100.4	-	30914	246957559..246926646	102546345, 7715694		LOC102546345
Insl6	0.001	0.001	0.199	0.001	1	1	210.989	1	Z-003771	Insl6	gene		D:\assemblies\Rattus_norvegicus-Rnor_6.0-dbSNP149\Rattus_norvegicus-Rnor_6.0-dbSNP149.genometemplate\sequences\NC_005100_chr1.gbk#0	282763074	NC_005100.4	-	3536	247476827..247473292	50546, 62061		Insl6
Pdcd1lg2	0.001	0.006	2.06	0.001	6.84236	6.84236	2179.21	1	Z-003776	Pdcd1lg2	gene		D:\assemblies\Rattus_norvegicus-Rnor_6.0-dbSNP149\Rattus_norvegicus-Rnor_6.0-dbSNP149.genometemplate\sequences\NC_005100_chr1.gbk#0	282763074	NC_005100.4	+	67078	247562202..247629279	309304, 1306403		Pdcd1lg2
Tpd52l3	0.001	0.006	0.206	0.001	5.99586	5.99586	218.328	1	Z-003783	Tpd52l3	gene		D:\assemblies\Rattus_norvegicus-Rnor_6.0-dbSNP149\Rattus_norvegicus-Rnor_6.0-dbSNP149.genometemplate\sequences\NC_005100_chr1.gbk#0	282763074	NC_005100.4	+	14662	248187429..248202090	293894, 1309391		Tpd52l3	RGD1309391, Trpd52l3
LOC103690131	0.001	0.005	0.126	0.001	5.25262	5.25262	132.989	1	Z-003791	LOC103690131	gene		D:\assemblies\Rattus_norvegicus-Rnor_6.0-dbSNP149\Rattus_norvegicus-Rnor_6.0-dbSNP149.genometemplate\sequences\NC_005100_chr1.gbk#0	282763074	NC_005100.4	+	10301	248643331..248653631	103690131, 9223097		LOC103690131
Minpp1	12.922	23.161	0.707	16.178	1.79245	1.43169	0.0437026	0.798733	Z-003803	Minpp1	gene		D:\assemblies\Rattus_norvegicus-Rnor_6.0-dbSNP149\Rattus_norvegicus-Rnor_6.0-dbSNP149.genometemplate\sequences\NC_005100_chr1.gbk#0	282763074	NC_005100.4	+	25694	251045352..251071045	29688, 3089		Minpp1
LOC102548095	3.543	10.03	0.001	5.125	2.83078	1.95723	0.000184424	0.691411	Z-003811	LOC102548095	gene		D:\assemblies\Rattus_norvegicus-Rnor_6.0-dbSNP149\Rattus_norvegicus-Rnor_6.0-dbSNP149.genometemplate\sequences\NC_005100_chr1.gbk#0	282763074	NC_005100.4	+	33764	251757238..251791001	102548095, 7659550		LOC102548095
Fas	1.287	2.326	2.335	0.261	1.80723	8.89957	8.93452	4.92443	Z-003822	Fas	gene		D:\assemblies\Rattus_norvegicus-Rnor_6.0-dbSNP149\Rattus_norvegicus-Rnor_6.0-dbSNP149.genometemplate\sequences\NC_005100_chr1.gbk#0	282763074	NC_005100.4	+	35006	252589785..252624790	246097, 619831		Fas	Tnfrsf6
Ifit2	2.946	7.411	0.282	4.898	2.51537	1.51293	0.0575155	0.601476	Z-003825	Ifit2	gene		D:\assemblies\Rattus_norvegicus-Rnor_6.0-dbSNP149\Rattus_norvegicus-Rnor_6.0-dbSNP149.genometemplate\sequences\NC_005100_chr1.gbk#0	282763074	NC_005100.4	+	6065	252894663..252900727	294091, 1307804		Ifit2
Ifit3	5.372	9.682	0.338	6.043	1.80228	1.60215	0.0559136	0.888955	Z-003826	Ifit3	gene		D:\assemblies\Rattus_norvegicus-Rnor_6.0-dbSNP149\Rattus_norvegicus-Rnor_6.0-dbSNP149.genometemplate\sequences\NC_005100_chr1.gbk#0	282763074	NC_005100.4	+	5144	252906234..252911377	309526, 1359681		Ifit3
Ifit1	0.369	0.106	0.001	0.426	0.287129	0.248798	0.00221643	0.866502	Z-003828	Ifit1	gene		D:\assemblies\Rattus_norvegicus-Rnor_6.0-dbSNP149\Rattus_norvegicus-Rnor_6.0-dbSNP149.genometemplate\sequences\NC_005100_chr1.gbk#0	282763074	NC_005100.4	+	2066	252944105..252946170	56824, 620599		Ifit1	Garg16
Slc16a12	0.413	0.911	0.001	0.576	2.2038	1.58243	0.0016414	0.718047	Z-003829	Slc16a12	gene		D:\assemblies\Rattus_norvegicus-Rnor_6.0-dbSNP149\Rattus_norvegicus-Rnor_6.0-dbSNP149.genometemplate\sequences\NC_005100_chr1.gbk#0	282763074	NC_005100.4	-	78430	253054500..252976071	309525, 1311468		Slc16a12	RGD1311468
Htr7	0.005	0.008	0.149	0.001	1.70056	8.89733	157.122	5.23199	Z-003835	Htr7	gene		D:\assemblies\Rattus_norvegicus-Rnor_6.0-dbSNP149\Rattus_norvegicus-Rnor_6.0-dbSNP149.genometemplate\sequences\NC_005100_chr1.gbk#0	282763074	NC_005100.4	-	123848	254671811..254547964	65032, 71034		Htr7	5Ht7
LOC103691349	0.385	0.075	0.001	0.76	0.194124	0.0984797	0.0012441	0.507304	Z-003839	LOC103691349	gene		D:\assemblies\Rattus_norvegicus-Rnor_6.0-dbSNP149\Rattus_norvegicus-Rnor_6.0-dbSNP149.genometemplate\sequences\NC_005100_chr1.gbk#0	282763074	NC_005100.4	+	3833	255136794..255140626	103691349, 9179158		LOC103691349
Hectd2	0.376	0.526	0.117	0.64	1.40057	0.822262	0.183478	0.58709	Z-003840	Hectd2	gene		D:\assemblies\Rattus_norvegicus-Rnor_6.0-dbSNP149\Rattus_norvegicus-Rnor_6.0-dbSNP149.genometemplate\sequences\NC_005100_chr1.gbk#0	282763074	NC_005100.4	+	67579	255186729..255254307	309514, 1305536		Hectd2
LOC102553702	0.001	0.301	0.045	0.001	318.689	318.689	47.8114	1	Z-003842	LOC102553702	gene		D:\assemblies\Rattus_norvegicus-Rnor_6.0-dbSNP149\Rattus_norvegicus-Rnor_6.0-dbSNP149.genometemplate\sequences\NC_005100_chr1.gbk#0	282763074	NC_005100.4	+	6086	255416510..255422595	102553702, 7595572		LOC102553702
Kif11	2.41	4.975	0.582	3.857	2.06451	1.2899	0.150871	0.624796	Z-003852	Kif11	gene		D:\assemblies\Rattus_norvegicus-Rnor_6.0-dbSNP149\Rattus_norvegicus-Rnor_6.0-dbSNP149.genometemplate\sequences\NC_005100_chr1.gbk#0	282763074	NC_005100.4	+	52434	256035866..256088299	171304, 621258		Kif11	Knsl1
LOC102549441	0.001	0.001	0.081	0.001	1	1	86.0701	1	Z-003856	LOC102549441	gene		D:\assemblies\Rattus_norvegicus-Rnor_6.0-dbSNP149\Rattus_norvegicus-Rnor_6.0-dbSNP149.genometemplate\sequences\NC_005100_chr1.gbk#0	282763074	NC_005100.4	-	1943	256382689..256380747	102549441, 7597238		LOC102549441
Cyp26a1	0.001	0.008	0.479	0.001	8.03688	8.03688	506.446	1	Z-003857	Cyp26a1	gene		D:\assemblies\Rattus_norvegicus-Rnor_6.0-dbSNP149\Rattus_norvegicus-Rnor_6.0-dbSNP149.genometemplate\sequences\NC_005100_chr1.gbk#0	282763074	NC_005100.4	+	3869	256382861..256386729	154985, 620161		Cyp26a1	Cyp26
Tbc1d12	0.843	0.152	0.17	1.586	0.180545	0.0959501	0.107329	0.531447	Z-003872	Tbc1d12	gene		D:\assemblies\Rattus_norvegicus-Rnor_6.0-dbSNP149\Rattus_norvegicus-Rnor_6.0-dbSNP149.genometemplate\sequences\NC_005100_chr1.gbk#0	282763074	NC_005100.4	+	82532	257517128..257599659	103689984, 9377071		Tbc1d12
Pdlim1	45.124	96.479	11.113	45.379	2.13807	2.12605	0.244885	0.99438	Z-003893	Pdlim1	gene		D:\assemblies\Rattus_norvegicus-Rnor_6.0-dbSNP149\Rattus_norvegicus-Rnor_6.0-dbSNP149.genometemplate\sequences\NC_005100_chr1.gbk#0	282763074	NC_005100.4	-	48681	259357006..259308326	54133, 68324		Pdlim1	CLP36
Blnk	3.458	6.021	26.622	6.366	1.74123	0.945756	4.18159	0.543155	Z-003906	Blnk	gene		D:\assemblies\Rattus_norvegicus-Rnor_6.0-dbSNP149\Rattus_norvegicus-Rnor_6.0-dbSNP149.genometemplate\sequences\NC_005100_chr1.gbk#0	282763074	NC_005100.4	-	67468	260254490..260187023	499356, 1561933		Blnk
Dntt	1.23	2.562	0.226	1.537	2.08245	1.66683	0.147112	0.800417	Z-003907	Dntt	gene		D:\assemblies\Rattus_norvegicus-Rnor_6.0-dbSNP149\Rattus_norvegicus-Rnor_6.0-dbSNP149.genometemplate\sequences\NC_005100_chr1.gbk#0	282763074	NC_005100.4	+	31549	260289626..260321174	294051, 1305054		Dntt
Ubtd1	6.927	5.288	1.783	7.979	0.763397	0.662771	0.223524	0.868186	Z-003924	Ubtd1	gene		D:\assemblies\Rattus_norvegicus-Rnor_6.0-dbSNP149\Rattus_norvegicus-Rnor_6.0-dbSNP149.genometemplate\sequences\NC_005100_chr1.gbk#0	282763074	NC_005100.4	+	51197	261229347..261280543	309373, 1308172		Ubtd1
Hoga1	0.937	4.294	0.411	2.233	4.58433	1.92252	0.183892	0.419367	Z-003926	Hoga1	gene		D:\assemblies\Rattus_norvegicus-Rnor_6.0-dbSNP149\Rattus_norvegicus-Rnor_6.0-dbSNP149.genometemplate\sequences\NC_005100_chr1.gbk#0	282763074	NC_005100.4	+	28002	261291742..261319743	293949, 1310475		Hoga1	Dhdpsl, Npl2, RGD1310475
MGC93861	0.008	0.055	0.131	0.001	6.5489	58.0013	138.482	8.85665	Z-003927	MGC93861	gene		D:\assemblies\Rattus_norvegicus-Rnor_6.0-dbSNP149\Rattus_norvegicus-Rnor_6.0-dbSNP149.genometemplate\sequences\NC_005100_chr1.gbk#0	282763074	NC_005100.4	+	1360	261298147..261299506	682010, 1588156		MGC93861
Morn4	0.121	0.148	0.001	2.055	1.22223	0.0718031	0.000459938	0.0587476	Z-003928	Morn4	gene		D:\assemblies\Rattus_norvegicus-Rnor_6.0-dbSNP149\Rattus_norvegicus-Rnor_6.0-dbSNP149.genometemplate\sequences\NC_005100_chr1.gbk#0	282763074	NC_005100.4	-	10305	261333383..261323079	293950, 1307336		Morn4	RGD1307336
LOC100911951	0.005	0.001	0.104	0.001	0.194467	1	110.377	5.14226	Z-003948	LOC100911951	gene		D:\assemblies\Rattus_norvegicus-Rnor_6.0-dbSNP149\Rattus_norvegicus-Rnor_6.0-dbSNP149.genometemplate\sequences\NC_005100_chr1.gbk#0	282763074	NC_005100.4	+	23794	262892552..262916345	100911951, 6489795		LOC100911951
Nkx2-3	0.001	0.001	0.738	0.001	1	1	780.317	1	Z-003958	Nkx2-3	gene		D:\assemblies\Rattus_norvegicus-Rnor_6.0-dbSNP149\Rattus_norvegicus-Rnor_6.0-dbSNP149.genometemplate\sequences\NC_005100_chr1.gbk#0	282763074	NC_005100.4	+	9806	263361238..263371043	309389, 1308521		Nkx2-3
Slc25a28	3.419	6.048	20.855	4.62	1.76881	1.30898	4.51387	0.740037	Z-003959	Slc25a28	gene		D:\assemblies\Rattus_norvegicus-Rnor_6.0-dbSNP149\Rattus_norvegicus-Rnor_6.0-dbSNP149.genometemplate\sequences\NC_005100_chr1.gbk#0	282763074	NC_005100.4	-	11274	263431312..263420039	688811, 1584155		Slc25a28
Lzts2	5.981	10.091	0.786	7.716	1.68711	1.30782	0.101838	0.775185	Z-003987	Lzts2	gene		D:\assemblies\Rattus_norvegicus-Rnor_6.0-dbSNP149\Rattus_norvegicus-Rnor_6.0-dbSNP149.genometemplate\sequences\NC_005100_chr1.gbk#0	282763074	NC_005100.4	+	11298	264765256..264776553	365468, 1359249		Lzts2	Lapser1
Btrc	5.288	9.34	1.456	6.709	1.76617	1.39213	0.216954	0.78822	Z-003997	Btrc	gene		D:\assemblies\Rattus_norvegicus-Rnor_6.0-dbSNP149\Rattus_norvegicus-Rnor_6.0-dbSNP149.genometemplate\sequences\NC_005100_chr1.gbk#0	282763074	NC_005100.4	+	170170	265100094..265270263	361765, 1359721		Btrc	beta-TrCP1
LOC102550220	0.674	2.126	1.885	0.386	3.15329	5.50191	4.87727	1.74481	Z-004003	LOC102550220	gene		D:\assemblies\Rattus_norvegicus-Rnor_6.0-dbSNP149\Rattus_norvegicus-Rnor_6.0-dbSNP149.genometemplate\sequences\NC_005100_chr1.gbk#0	282763074	NC_005100.4	-	13274	265487481..265474208	102550220, 7573700		LOC102550220
Kcnip2	0.005	0.001	0.104	0.001	0.194467	1	110.377	5.14226	Z-004008	Kcnip2	gene		D:\assemblies\Rattus_norvegicus-Rnor_6.0-dbSNP149\Rattus_norvegicus-Rnor_6.0-dbSNP149.genometemplate\sequences\NC_005100_chr1.gbk#0	282763074	NC_005100.4	-	23784	265573393..265549610	56817, 70887		Kcnip2	Kchip2
LOC102551485	0.007	0.497	2.614	0.151	76.1391	3.29874	17.3464	0.0433252	Z-004017	LOC102551485	gene		D:\assemblies\Rattus_norvegicus-Rnor_6.0-dbSNP149\Rattus_norvegicus-Rnor_6.0-dbSNP149.genometemplate\sequences\NC_005100_chr1.gbk#0	282763074	NC_005100.4	-	2379	266050163..266047785	102551485, 7672409		LOC102551485
Nfkb2	3.526	7.576	36.39	4.532	2.14842	1.67149	8.02884	0.778011	Z-004018	Nfkb2	gene		D:\assemblies\Rattus_norvegicus-Rnor_6.0-dbSNP149\Rattus_norvegicus-Rnor_6.0-dbSNP149.genometemplate\sequences\NC_005100_chr1.gbk#0	282763074	NC_005100.4	+	8644	266050634..266059277	309452, 1307189		Nfkb2	RGD1307189
Neurl1	2.235	3.258	0.001	2.698	1.45757	1.2075	0.000350302	0.828433	Z-004046	Neurl1	gene		D:\assemblies\Rattus_norvegicus-Rnor_6.0-dbSNP149\Rattus_norvegicus-Rnor_6.0-dbSNP149.genometemplate\sequences\NC_005100_chr1.gbk#0	282763074	NC_005100.4	+	85874	266953006..267038879	309459, 1307021		Neurl1	Neurl, Neurl1a
LOC108349530	0.189	1.343	2.099	0.337	7.12292	3.98349	6.22609	0.55925	Z-004047	LOC108349530	gene		D:\assemblies\Rattus_norvegicus-Rnor_6.0-dbSNP149\Rattus_norvegicus-Rnor_6.0-dbSNP149.genometemplate\sequences\NC_005100_chr1.gbk#0	282763074	NC_005100.4	+	4401	267009287..267013687	108349530		LOC108349530
LOC108349533	0.001	0.001	0.242	0.001	1	1	255.704	1	Z-004051	LOC108349533	gene		D:\assemblies\Rattus_norvegicus-Rnor_6.0-dbSNP149\Rattus_norvegicus-Rnor_6.0-dbSNP149.genometemplate\sequences\NC_005100_chr1.gbk#0	282763074	NC_005100.4	+	3345	267282064..267285408	108349533		LOC108349533
Slk	5.745	8.548	1.006	5.87	1.4879	1.4563	0.171408	0.97876	Z-004052	Slk	gene		D:\assemblies\Rattus_norvegicus-Rnor_6.0-dbSNP149\Rattus_norvegicus-Rnor_6.0-dbSNP149.genometemplate\sequences\NC_005100_chr1.gbk#0	282763074	NC_005100.4	+	55975	267359761..267415735	54308, 3780		Slk	Stk2
LOC103691371	0.004	0.001	0.045	0.001	0.258495	1	47.7976	3.86855	Z-004054	LOC103691371	gene		D:\assemblies\Rattus_norvegicus-Rnor_6.0-dbSNP149\Rattus_norvegicus-Rnor_6.0-dbSNP149.genometemplate\sequences\NC_005100_chr1.gbk#0	282763074	NC_005100.4	+	34691	267440213..267474903	103691371, 9454647		LOC103691371
Mxi1	22.049	46.824	1.479	27.071	2.12361	1.72967	0.0546442	0.814496	Z-004096	Mxi1	gene		D:\assemblies\Rattus_norvegicus-Rnor_6.0-dbSNP149\Rattus_norvegicus-Rnor_6.0-dbSNP149.genometemplate\sequences\NC_005100_chr1.gbk#0	282763074	NC_005100.4	+	59324	274030748..274090071	25701, 3128		Mxi1	MXI-WR
LOC102553769	0.001	0.001	0.554	0.001	1	1	585.852	1	Z-004113	LOC102553769	gene		D:\assemblies\Rattus_norvegicus-Rnor_6.0-dbSNP149\Rattus_norvegicus-Rnor_6.0-dbSNP149.genometemplate\sequences\NC_005100_chr1.gbk#0	282763074	NC_005100.4	+	1651	275847187..275848837	102553769, 7709336		LOC102553769
LOC102546765	0.029	0.065	0.229	0.001	2.2712	69.103	242.562	30.4257	Z-004127	LOC102546765	gene		D:\assemblies\Rattus_norvegicus-Rnor_6.0-dbSNP149\Rattus_norvegicus-Rnor_6.0-dbSNP149.genometemplate\sequences\NC_005100_chr1.gbk#0	282763074	NC_005100.4	+	8214	277056773..277064986	102546765, 7718668		LOC102546765
Afap1l2	4.69	7.767	0.483	6.762	1.65591	1.14865	0.0715053	0.693666	Z-004143	Afap1l2	gene		D:\assemblies\Rattus_norvegicus-Rnor_6.0-dbSNP149\Rattus_norvegicus-Rnor_6.0-dbSNP149.genometemplate\sequences\NC_005100_chr1.gbk#0	282763074	NC_005100.4	-	96540	277827299..277730760	292130, 1310668		Afap1l2	RGD1310668
Sfxn4	0.086	0.071	7.765	0.256	0.827829	0.276272	30.28	0.333731	Z-004200	Sfxn4	gene		D:\assemblies\Rattus_norvegicus-Rnor_6.0-dbSNP149\Rattus_norvegicus-Rnor_6.0-dbSNP149.genometemplate\sequences\NC_005100_chr1.gbk#0	282763074	NC_005100.4	-	23242	282236851..282213610	361778, 1306088		Sfxn4
Prdx3	31.585	71.636	6.992	38.6	2.26802	1.85582	0.181148	0.818256	Z-004201	Prdx3	gene		D:\assemblies\Rattus_norvegicus-Rnor_6.0-dbSNP149\Rattus_norvegicus-Rnor_6.0-dbSNP149.genometemplate\sequences\NC_005100_chr1.gbk#0	282763074	NC_005100.4	-	12420	282251193..282238774	64371, 620040		Prdx3	Prx3
LOC102550291	0.506	1.016	2.249	0.391	2.00956	2.5995	5.75199	1.29356	Z-004203	LOC102550291	gene		D:\assemblies\Rattus_norvegicus-Rnor_6.0-dbSNP149\Rattus_norvegicus-Rnor_6.0-dbSNP149.genometemplate\sequences\NC_005100_chr1.gbk#0	282763074	NC_005100.4	-	33384	282513138..282479755	102550291, 7570552		LOC102550291
Erap1	4.166	5.142	19.138	3.255	1.23429	1.57985	5.88008	1.27997	Z-004216	Erap1	gene		D:\assemblies\Rattus_norvegicus-Rnor_6.0-dbSNP149\Rattus_norvegicus-Rnor_6.0-dbSNP149.genometemplate\sequences\NC_005101_chr2.gbk#0	266435125	NC_005101.4	+	38858	1410877..1449734	80897, 708542		Erap1	Appils, Arts1
Glrx	26.859	45.558	6.764	30.042	1.69619	1.5165	0.225152	0.894066	Z-004221	Glrx	gene		D:\assemblies\Rattus_norvegicus-Rnor_6.0-dbSNP149\Rattus_norvegicus-Rnor_6.0-dbSNP149.genometemplate\sequences\NC_005101_chr2.gbk#0	266435125	NC_005101.4	+	9913	2606032..2615944	64045, 70951		Glrx	Glrx1, Grx
Rhobtb3	0.644	0.144	0.144	0.77	0.223079	0.18666	0.187167	0.836745	Z-004222	Rhobtb3	gene		D:\assemblies\Rattus_norvegicus-Rnor_6.0-dbSNP149\Rattus_norvegicus-Rnor_6.0-dbSNP149.genometemplate\sequences\NC_005101_chr2.gbk#0	266435125	NC_005101.4	-	55651	2683305..2627655	309922, 1311683		Rhobtb3
Adgrv1	0.002	0.041	0.711	0.005	25.077	7.47549	130.031	0.298101	Z-004243	Adgrv1	gene		D:\assemblies\Rattus_norvegicus-Rnor_6.0-dbSNP149\Rattus_norvegicus-Rnor_6.0-dbSNP149.genometemplate\sequences\NC_005101_chr2.gbk#0	266435125	NC_005101.4	-	577613	9504455..8926843	100362255, 1562101		Adgrv1
Edil3	0.296	0.001	0.312	0.001	0.0031902	1	330.484	313.46	Z-004274	Edil3	gene		D:\assemblies\Rattus_norvegicus-Rnor_6.0-dbSNP149\Rattus_norvegicus-Rnor_6.0-dbSNP149.genometemplate\sequences\NC_005101_chr2.gbk#0	266435125	NC_005101.4	+	512399	17616116..18128514	688400, 1588887		Edil3
LOC103691422	0.009	1.583	0.001	0.319	166.784	4.95611	0.00295923	0.0297157	Z-004308	LOC103691422	gene		D:\assemblies\Rattus_norvegicus-Rnor_6.0-dbSNP149\Rattus_norvegicus-Rnor_6.0-dbSNP149.genometemplate\sequences\NC_005101_chr2.gbk#0	266435125	NC_005101.4	-	23001	22847622..22824622	103691422, 9307820		LOC103691422
Bhmt2	0.004	0.342	0.001	0.252	78.6875	1.36035	0.0037571	0.017288	Z-004313	Bhmt2	gene		D:\assemblies\Rattus_norvegicus-Rnor_6.0-dbSNP149\Rattus_norvegicus-Rnor_6.0-dbSNP149.genometemplate\sequences\NC_005101_chr2.gbk#0	266435125	NC_005101.4	-	16947	23289266..23272320	365972, 1359418		Bhmt2
Tbca	63.685	139.24	355.781	79.091	2.18639	1.76052	4.4984	0.805217	Z-004320	Tbca	gene		D:\assemblies\Rattus_norvegicus-Rnor_6.0-dbSNP149\Rattus_norvegicus-Rnor_6.0-dbSNP149.genometemplate\sequences\NC_005101_chr2.gbk#0	266435125	NC_005101.4	+	55854	24449498..24505351	366995, 1311538		Tbca
Fam169a	0.004	0.001	0.329	0.001	0.250769	1	348.066	3.98774	Z-004354	Fam169a	gene		D:\assemblies\Rattus_norvegicus-Rnor_6.0-dbSNP149\Rattus_norvegicus-Rnor_6.0-dbSNP149.genometemplate\sequences\NC_005101_chr2.gbk#0	266435125	NC_005101.4	+	56322	27884748..27941069	310013, 1590893		Fam169a
LOC102556480	0.001	0.001	0.104	0.001	1	1	110.229	1	Z-004365	LOC102556480	gene		D:\assemblies\Rattus_norvegicus-Rnor_6.0-dbSNP149\Rattus_norvegicus-Rnor_6.0-dbSNP149.genometemplate\sequences\NC_005101_chr2.gbk#0	266435125	NC_005101.4	+	5379	28528768..28534146	102556480, 7710032		LOC102556480
Fcho2	4.017	6.475	0.764	4.357	1.61196	1.48618	0.175312	0.921967	Z-004370	Fcho2	gene		D:\assemblies\Rattus_norvegicus-Rnor_6.0-dbSNP149\Rattus_norvegicus-Rnor_6.0-dbSNP149.genometemplate\sequences\NC_005101_chr2.gbk#0	266435125	NC_005101.4	-	101354	29029271..28927918	309129, 1565396		Fcho2	RGD1565396
Map1b	0.429	0.495	0.076	0.848	1.15499	0.583734	0.0890552	0.505403	Z-004378	Map1b	gene		D:\assemblies\Rattus_norvegicus-Rnor_6.0-dbSNP149\Rattus_norvegicus-Rnor_6.0-dbSNP149.genometemplate\sequences\NC_005101_chr2.gbk#0	266435125	NC_005101.4	-	93360	29768750..29675391	29456, 3043		Map1b	Mtap1b
LOC102554754	0.004	0.001	1.575	0.001	0.220131	1	1666.4	4.54274	Z-004392	LOC102554754	gene		D:\assemblies\Rattus_norvegicus-Rnor_6.0-dbSNP149\Rattus_norvegicus-Rnor_6.0-dbSNP149.genometemplate\sequences\NC_005101_chr2.gbk#0	266435125	NC_005101.4	-	3582	30486931..30483350	102554754, 7658944		LOC102554754
Gtf2h2	2.856	3.562	14.466	2.382	1.24704	1.49545	6.07407	1.19919	Z-004393	Gtf2h2	gene		D:\assemblies\Rattus_norvegicus-Rnor_6.0-dbSNP149\Rattus_norvegicus-Rnor_6.0-dbSNP149.genometemplate\sequences\NC_005101_chr2.gbk#0	266435125	NC_005101.4	-	27999	30522716..30494718	294693, 1310499		Gtf2h2	BTF2 p44
Erbin	7.817	9.555	1.705	8.732	1.22229	1.09418	0.195232	0.895186	Z-004424	Erbin	gene		D:\assemblies\Rattus_norvegicus-Rnor_6.0-dbSNP149\Rattus_norvegicus-Rnor_6.0-dbSNP149.genometemplate\sequences\NC_005101_chr2.gbk#0	266435125	NC_005101.4	-	71947	33952806..33880860	365661, 1562952		Erbin
Srek1ip1	0.016	0.01	31.672	0.681	0.646522	0.0149781	46.5342	0.0231672	Z-004433	Srek1ip1	gene		D:\assemblies\Rattus_norvegicus-Rnor_6.0-dbSNP149\Rattus_norvegicus-Rnor_6.0-dbSNP149.genometemplate\sequences\NC_005101_chr2.gbk#0	266435125	NC_005101.4	+	17224	34923187..34940410	361888, 1305356		Srek1ip1	P18srp, RGD1305356, Sfrs12ip1
Dimt1	2.032	3.394	15.178	2.933	1.67075	1.15726	5.17462	0.692662	Z-004462	Dimt1	gene		D:\assemblies\Rattus_norvegicus-Rnor_6.0-dbSNP149\Rattus_norvegicus-Rnor_6.0-dbSNP149.genometemplate\sequences\NC_005101_chr2.gbk#0	266435125	NC_005101.4	+	24310	38120562..38144871	294718, 1311752		Dimt1	Dimt1l, RGD1311752
Plk2	5.699	9.46	1.217	6.971	1.66005	1.35707	0.174528	0.817487	Z-004485	Plk2	gene		D:\assemblies\Rattus_norvegicus-Rnor_6.0-dbSNP149\Rattus_norvegicus-Rnor_6.0-dbSNP149.genometemplate\sequences\NC_005101_chr2.gbk#0	266435125	NC_005101.4	+	5759	41911143..41916901	83722, 620760		Plk2	Snk
LOC102553935	0.001	0.001	0.137	0.001	1	1	144.431	1	Z-004492	LOC102553935	gene		D:\assemblies\Rattus_norvegicus-Rnor_6.0-dbSNP149\Rattus_norvegicus-Rnor_6.0-dbSNP149.genometemplate\sequences\NC_005101_chr2.gbk#0	266435125	NC_005101.4	+	17650	43399079..43416728	102553935, 7683682		LOC102553935
LOC108349944	0.001	0.001	0.885	0.001	1	1	936.665	1	Z-004496	LOC108349944	gene		D:\assemblies\Rattus_norvegicus-Rnor_6.0-dbSNP149\Rattus_norvegicus-Rnor_6.0-dbSNP149.genometemplate\sequences\NC_005101_chr2.gbk#0	266435125	NC_005101.4	+	3015	44024264..44027278	108349944		LOC108349944
Gzma	0.006	0.001	2.096	0.001	0.145875	1	2217.16	6.85517	Z-004513	Gzma	gene		D:\assemblies\Rattus_norvegicus-Rnor_6.0-dbSNP149\Rattus_norvegicus-Rnor_6.0-dbSNP149.genometemplate\sequences\NC_005101_chr2.gbk#0	266435125	NC_005101.4	-	12591	44981436..44968846	266708, 628640		Gzma
Snx18	3.552	4.697	0.529	5.743	1.32227	0.817913	0.0921963	0.618569	Z-004518	Snx18	gene		D:\assemblies\Rattus_norvegicus-Rnor_6.0-dbSNP149\Rattus_norvegicus-Rnor_6.0-dbSNP149.genometemplate\sequences\NC_005101_chr2.gbk#0	266435125	NC_005101.4	-	26017	45480798..45454782	310097, 1310367		Snx18	Snag1
Parp8	1.109	1.525	13.117	1.888	1.37463	0.807513	6.94634	0.587438	Z-004542	Parp8	gene		D:\assemblies\Rattus_norvegicus-Rnor_6.0-dbSNP149\Rattus_norvegicus-Rnor_6.0-dbSNP149.genometemplate\sequences\NC_005101_chr2.gbk#0	266435125	NC_005101.4	-	368900	49455848..49086949	294762, 1587384		Parp8
Emb	19.425	40.248	1.48	21.113	2.0719	1.90626	0.0700909	0.920054	Z-004545	Emb	gene		D:\assemblies\Rattus_norvegicus-Rnor_6.0-dbSNP149\Rattus_norvegicus-Rnor_6.0-dbSNP149.genometemplate\sequences\NC_005101_chr2.gbk#0	266435125	NC_005101.4	+	50713	49682763..49733475	114511, 621067		Emb
Mrps30	4.066	7.943	23.9	3.489	1.95357	2.27633	6.84943	1.16521	Z-004548	Mrps30	gene		D:\assemblies\Rattus_norvegicus-Rnor_6.0-dbSNP149\Rattus_norvegicus-Rnor_6.0-dbSNP149.genometemplate\sequences\NC_005101_chr2.gbk#0	266435125	NC_005101.4	-	6876	51049423..51042548	294767, 1309697		Mrps30
Tmem267	0.001	0.001	0.317	0.001	1	1	335.524	1	Z-004555	Tmem267	gene		D:\assemblies\Rattus_norvegicus-Rnor_6.0-dbSNP149\Rattus_norvegicus-Rnor_6.0-dbSNP149.genometemplate\sequences\NC_005101_chr2.gbk#0	266435125	NC_005101.4	+	9627	52356449..52366075	499532, 1562550		Tmem267
Nim1k	0.001	0.09	0.231	0.001	95.2149	95.2149	244.347	1	Z-004561	Nim1k	gene		D:\assemblies\Rattus_norvegicus-Rnor_6.0-dbSNP149\Rattus_norvegicus-Rnor_6.0-dbSNP149.genometemplate\sequences\NC_005101_chr2.gbk#0	266435125	NC_005101.4	-	45392	52494137..52448746	310376, 1308116		Nim1k
LOC102556643	0.951	0.816	11.392	0.978	0.857138	0.833568	11.6439	0.972501	Z-004565	LOC102556643	gene		D:\assemblies\Rattus_norvegicus-Rnor_6.0-dbSNP149\Rattus_norvegicus-Rnor_6.0-dbSNP149.genometemplate\sequences\NC_005101_chr2.gbk#0	266435125	NC_005101.4	+	8361	52671054..52679414	102556643, 7557368		LOC102556643
LOC102547748	0.007	0.001	0.508	0.001	0.141635	1	537.514	7.06043	Z-004567	LOC102547748	gene		D:\assemblies\Rattus_norvegicus-Rnor_6.0-dbSNP149\Rattus_norvegicus-Rnor_6.0-dbSNP149.genometemplate\sequences\NC_005101_chr2.gbk#0	266435125	NC_005101.4	-	3637	52728598..52724962	102547748, 7525204		LOC102547748
LOC103691468	0.742	0.118	17.143	0.463	0.158731	0.254333	37.0054	1.60229	Z-004568	LOC103691468	gene		D:\assemblies\Rattus_norvegicus-Rnor_6.0-dbSNP149\Rattus_norvegicus-Rnor_6.0-dbSNP149.genometemplate\sequences\NC_005101_chr2.gbk#0	266435125	NC_005101.4	+	49118	52781311..52830428	103691468, 9193186		LOC103691468
LOC102547847	0.001	0.001	4.131	0.001	1	1	4370.45	1	Z-004569	LOC102547847	gene		D:\assemblies\Rattus_norvegicus-Rnor_6.0-dbSNP149\Rattus_norvegicus-Rnor_6.0-dbSNP149.genometemplate\sequences\NC_005101_chr2.gbk#0	266435125	NC_005101.4	+	3867	52781939..52785805	102547847, 7643568		LOC102547847
LOC103691472	0.001	0.001	0.637	0.001	1	1	674.436	1	Z-004574	LOC103691472	gene		D:\assemblies\Rattus_norvegicus-Rnor_6.0-dbSNP149\Rattus_norvegicus-Rnor_6.0-dbSNP149.genometemplate\sequences\NC_005101_chr2.gbk#0	266435125	NC_005101.4	+	17610	53126203..53143812	103691472, 9428698		LOC103691472
RGD1305938	2.398	0.181	0.329	2.383	0.0754784	0.0759528	0.138086	1.00629	Z-004578	RGD1305938	gene		D:\assemblies\Rattus_norvegicus-Rnor_6.0-dbSNP149\Rattus_norvegicus-Rnor_6.0-dbSNP149.genometemplate\sequences\NC_005101_chr2.gbk#0	266435125	NC_005101.4	-	14201	53827329..53813129	310362, 1305938		RGD1305938
Rpl37	182.597	368.775	3207.71	189.057	2.01961	1.9506	16.9669	0.965831	Z-004589	Rpl37	gene		D:\assemblies\Rattus_norvegicus-Rnor_6.0-dbSNP149\Rattus_norvegicus-Rnor_6.0-dbSNP149.genometemplate\sequences\NC_005101_chr2.gbk#0	266435125	NC_005101.4	+	1954	54832634..54834587	81770, 621204		Rpl37
LOC103691476	0.001	0.001	0.15	0.001	1	1	158.748	1	Z-004594	LOC103691476	gene		D:\assemblies\Rattus_norvegicus-Rnor_6.0-dbSNP149\Rattus_norvegicus-Rnor_6.0-dbSNP149.genometemplate\sequences\NC_005101_chr2.gbk#0	266435125	NC_005101.4	+	3466	55306077..55309542	103691476, 9459067		LOC103691476
Dab2	19.962	24.785	2.26	24.325	1.24163	1.01893	0.0929263	0.820634	Z-004596	Dab2	gene		D:\assemblies\Rattus_norvegicus-Rnor_6.0-dbSNP149\Rattus_norvegicus-Rnor_6.0-dbSNP149.genometemplate\sequences\NC_005101_chr2.gbk#0	266435125	NC_005101.4	+	21496	55747353..55768848	79128, 621007		Dab2	Doc-2, Doc2
Skp2	1.187	2.601	0.104	1.332	2.1921	1.95302	0.0780606	0.890935	Z-004622	Skp2	gene		D:\assemblies\Rattus_norvegicus-Rnor_6.0-dbSNP149\Rattus_norvegicus-Rnor_6.0-dbSNP149.genometemplate\sequences\NC_005101_chr2.gbk#0	266435125	NC_005101.4	-	28066	58534211..58506146	294790, 1562456		Skp2	RGD1562456
LOC108349963	0.001	0.001	0.177	0.001	1	1	187.738	1	Z-004627	LOC108349963	gene		D:\assemblies\Rattus_norvegicus-Rnor_6.0-dbSNP149\Rattus_norvegicus-Rnor_6.0-dbSNP149.genometemplate\sequences\NC_005101_chr2.gbk#0	266435125	NC_005101.4	+	8352	58911369..58919720	108349963		LOC108349963
LOC108349965	0.001	0.001	1.684	0.001	1	1	1781.6	1	Z-004637	LOC108349965	gene		D:\assemblies\Rattus_norvegicus-Rnor_6.0-dbSNP149\Rattus_norvegicus-Rnor_6.0-dbSNP149.genometemplate\sequences\NC_005101_chr2.gbk#0	266435125	NC_005101.4	-	10410	60487019..60476610	108349965		LOC108349965
Rai14	11.725	15.292	2.527	14.301	1.30421	1.06931	0.176667	0.819893	Z-004639	Rai14	gene		D:\assemblies\Rattus_norvegicus-Rnor_6.0-dbSNP149\Rattus_norvegicus-Rnor_6.0-dbSNP149.genometemplate\sequences\NC_005101_chr2.gbk#0	266435125	NC_005101.4	-	138283	60684365..60546083	294804, 1305942		Rai14
LOC103691483	0.095	0.685	0.555	0.001	7.18174	724.45	587.485	100.874	Z-004640	LOC103691483	gene		D:\assemblies\Rattus_norvegicus-Rnor_6.0-dbSNP149\Rattus_norvegicus-Rnor_6.0-dbSNP149.genometemplate\sequences\NC_005101_chr2.gbk#0	266435125	NC_005101.4	+	8165	60735521..60743685	103691483, 9387191		LOC103691483
Sub1	57.498	132.796	291.641	72.846	2.30959	1.82296	4.0035	0.7893	Z-004653	Sub1	gene		D:\assemblies\Rattus_norvegicus-Rnor_6.0-dbSNP149\Rattus_norvegicus-Rnor_6.0-dbSNP149.genometemplate\sequences\NC_005101_chr2.gbk#0	266435125	NC_005101.4	-	14803	62034704..62019902	192269, 621582		Sub1	Rpo2tc1
Pdzd2	0.502	0.715	0.105	0.697	1.42473	1.02492	0.151202	0.719382	Z-004657	Pdzd2	gene		D:\assemblies\Rattus_norvegicus-Rnor_6.0-dbSNP149\Rattus_norvegicus-Rnor_6.0-dbSNP149.genometemplate\sequences\NC_005101_chr2.gbk#0	266435125	NC_005101.4	-	120701	62520448..62399748	65034, 619958		Pdzd2	Papin, Pdzk3
RGD1306502	0.7	0.153	0.326	1.678	0.218317	0.0910216	0.194276	0.416924	Z-004660	RGD1306502	gene		D:\assemblies\Rattus_norvegicus-Rnor_6.0-dbSNP149\Rattus_norvegicus-Rnor_6.0-dbSNP149.genometemplate\sequences\NC_005101_chr2.gbk#0	266435125	NC_005101.4	-	16178	62887048..62870871	310158, 1306502		RGD1306502
Myo10	2.487	1.761	0.125	2.929	0.708193	0.601161	0.042709	0.848866	Z-004685	Myo10	gene		D:\assemblies\Rattus_norvegicus-Rnor_6.0-dbSNP149\Rattus_norvegicus-Rnor_6.0-dbSNP149.genometemplate\sequences\NC_005101_chr2.gbk#0	266435125	NC_005101.4	+	204046	77868398..78072443	310178, 1307193		Myo10
Ankh	6.363	6.002	1.163	6.055	0.943343	0.991263	0.192088	1.0508	Z-004694	Ankh	gene		D:\assemblies\Rattus_norvegicus-Rnor_6.0-dbSNP149\Rattus_norvegicus-Rnor_6.0-dbSNP149.genometemplate\sequences\NC_005101_chr2.gbk#0	266435125	NC_005101.4	+	125386	80131563..80256948	114506, 619925		Ankh	Ank
Fam105a	1.583	0.176	20.839	0.991	0.111102	0.177508	21.0371	1.5977	Z-004696	Fam105a	gene		D:\assemblies\Rattus_norvegicus-Rnor_6.0-dbSNP149\Rattus_norvegicus-Rnor_6.0-dbSNP149.genometemplate\sequences\NC_005101_chr2.gbk#0	266435125	NC_005101.4	-	25031	80408672..80383642	310190, 1563205		Fam105a
Dap	41.503	55.921	5.08	41.295	1.3474	1.35418	0.123006	1.00503	Z-004708	Dap	gene		D:\assemblies\Rattus_norvegicus-Rnor_6.0-dbSNP149\Rattus_norvegicus-Rnor_6.0-dbSNP149.genometemplate\sequences\NC_005101_chr2.gbk#0	266435125	NC_005101.4	+	53115	84275884..84328998	64322, 620641		Dap	Rap7a
LOC102553736	0.761	2.183	5.492	1.23	2.86903	1.77534	4.46621	0.618794	Z-004712	LOC102553736	gene		D:\assemblies\Rattus_norvegicus-Rnor_6.0-dbSNP149\Rattus_norvegicus-Rnor_6.0-dbSNP149.genometemplate\sequences\NC_005101_chr2.gbk#0	266435125	NC_005101.4	+	3340	84531403..84534742	102553736, 7678070		LOC102553736
LOC102548546	0.005	0.001	0.153	0.001	0.191802	1	162.304	5.2137	Z-004727	LOC102548546	gene		D:\assemblies\Rattus_norvegicus-Rnor_6.0-dbSNP149\Rattus_norvegicus-Rnor_6.0-dbSNP149.genometemplate\sequences\NC_005101_chr2.gbk#0	266435125	NC_005101.4	+	7422	87085461..87092882	102548546, 7564391		LOC102548546
Car2	235.301	554.565	10.519	324.417	2.35683	1.70942	0.0324242	0.725305	Z-004732	Car2	gene		D:\assemblies\Rattus_norvegicus-Rnor_6.0-dbSNP149\Rattus_norvegicus-Rnor_6.0-dbSNP149.genometemplate\sequences\NC_005101_chr2.gbk#0	266435125	NC_005101.4	-	15129	88112868..88097740	54231, 2240		Car2	Ca2
Car1	120.771	303.739	0.006	168.9	2.51499	1.79833	3.31569e-05	0.715044	Z-004734	Car1	gene		D:\assemblies\Rattus_norvegicus-Rnor_6.0-dbSNP149\Rattus_norvegicus-Rnor_6.0-dbSNP149.genometemplate\sequences\NC_005101_chr2.gbk#0	266435125	NC_005101.4	+	42283	88185204..88227486	310218, 1309780		Car1	CA-I, Ca1
RGD1565641	15.315	30.205	113.241	18.384	1.97227	1.64295	6.15963	0.833025	Z-004736	RGD1565641	gene		D:\assemblies\Rattus_norvegicus-Rnor_6.0-dbSNP149\Rattus_norvegicus-Rnor_6.0-dbSNP149.genometemplate\sequences\NC_005101_chr2.gbk#0	266435125	NC_005101.4	+	12768	88338018..88350785	499567, 1565641		RGD1565641
tGap1	0.001	0.001	0.409	0.001	1	1	432.57	1	Z-004752	tGap1	gene		D:\assemblies\Rattus_norvegicus-Rnor_6.0-dbSNP149\Rattus_norvegicus-Rnor_6.0-dbSNP149.genometemplate\sequences\NC_005101_chr2.gbk#0	266435125	NC_005101.4	+	76530	92549413..92625942	294892, 1359558		tGap1
Fabp4	583.432	1509.55	123.763	716.495	2.58737	2.10686	0.172734	0.814286	Z-004763	Fabp4	gene		D:\assemblies\Rattus_norvegicus-Rnor_6.0-dbSNP149\Rattus_norvegicus-Rnor_6.0-dbSNP149.genometemplate\sequences\NC_005101_chr2.gbk#0	266435125	NC_005101.4	+	4602	93792666..93797267	79451, 69309		Fabp4	Albp, aP2
Tpd52	15.643	21.317	4.837	20.361	1.36267	1.04695	0.237542	0.768305	Z-004777	Tpd52	gene		D:\assemblies\Rattus_norvegicus-Rnor_6.0-dbSNP149\Rattus_norvegicus-Rnor_6.0-dbSNP149.genometemplate\sequences\NC_005101_chr2.gbk#0	266435125	NC_005101.4	+	81546	94959732..95041277	294900, 1306767		Tpd52	PrLZ
LOC102546934	0.001	0.021	0.043	0.001	21.8638	21.8638	45.7207	1	Z-004778	LOC102546934	gene		D:\assemblies\Rattus_norvegicus-Rnor_6.0-dbSNP149\Rattus_norvegicus-Rnor_6.0-dbSNP149.genometemplate\sequences\NC_005101_chr2.gbk#0	266435125	NC_005101.4	-	7116	95010185..95003070	102546934, 7537942		LOC102546934
LOC102550696	0.208	0.337	0.001	0.304	1.62203	1.10805	0.00310731	0.683121	Z-004791	LOC102550696	gene		D:\assemblies\Rattus_norvegicus-Rnor_6.0-dbSNP149\Rattus_norvegicus-Rnor_6.0-dbSNP149.genometemplate\sequences\NC_005101_chr2.gbk#0	266435125	NC_005101.4	-	17569	97680496..97662928	102550696, 7672274		LOC102550696
Zfhx4	0.71	0.945	0.032	0.675	1.33164	1.40055	0.047442	1.05175	Z-004794	Zfhx4	gene		D:\assemblies\Rattus_norvegicus-Rnor_6.0-dbSNP149\Rattus_norvegicus-Rnor_6.0-dbSNP149.genometemplate\sequences\NC_005101_chr2.gbk#0	266435125	NC_005101.4	-	186804	98610368..98423565	310250, 1563022		Zfhx4	RGD1563022
Mtfr1	5.795	5.75	0.542	4.458	0.992268	1.28966	0.121518	1.29971	Z-004807	Mtfr1	gene		D:\assemblies\Rattus_norvegicus-Rnor_6.0-dbSNP149\Rattus_norvegicus-Rnor_6.0-dbSNP149.genometemplate\sequences\NC_005101_chr2.gbk#0	266435125	NC_005101.4	+	35219	104005696..104040914	311403, 1304936		Mtfr1	RGD1304936
Trim55	0.048	1.282	0.001	0.409	26.7495	3.13105	0.00230847	0.117051	Z-004822	Trim55	gene		D:\assemblies\Rattus_norvegicus-Rnor_6.0-dbSNP149\Rattus_norvegicus-Rnor_6.0-dbSNP149.genometemplate\sequences\NC_005101_chr2.gbk#0	266435125	NC_005101.4	+	42146	104416972..104459117	365751, 1306943		Trim55	Rnf29
Gyg1	11.785	20.282	2.839	15.172	1.72093	1.33681	0.187143	0.776798	Z-004828	Gyg1	gene		D:\assemblies\Rattus_norvegicus-Rnor_6.0-dbSNP149\Rattus_norvegicus-Rnor_6.0-dbSNP149.genometemplate\sequences\NC_005101_chr2.gbk#0	266435125	NC_005101.4	-	41486	104958219..104916734	81675, 621785		Gyg1	Gyg
Cpa3	0.758	0.31	0.001	1.34	0.408258	0.231018	0.000705339	0.565862	Z-004829	Cpa3	gene		D:\assemblies\Rattus_norvegicus-Rnor_6.0-dbSNP149\Rattus_norvegicus-Rnor_6.0-dbSNP149.genometemplate\sequences\NC_005101_chr2.gbk#0	266435125	NC_005101.4	-	31192	105047989..105016798	54242, 2390		Cpa3
LOC499584	0.001	0.006	0.173	0.001	6.11335	6.11335	182.653	1	Z-004845	LOC499584	gene		D:\assemblies\Rattus_norvegicus-Rnor_6.0-dbSNP149\Rattus_norvegicus-Rnor_6.0-dbSNP149.genometemplate\sequences\NC_005101_chr2.gbk#0	266435125	NC_005101.4	+	23280	110306363..110329642	499584, 1560081		LOC499584
Rpl22l1	76.518	213.689	487.645	86.298	2.79266	2.47618	5.65073	0.886676	Z-004880	Rpl22l1	gene		D:\assemblies\Rattus_norvegicus-Rnor_6.0-dbSNP149\Rattus_norvegicus-Rnor_6.0-dbSNP149.genometemplate\sequences\NC_005101_chr2.gbk#0	266435125	NC_005101.4	+	1937	115362799..115364735	361923, 1309517		Rpl22l1	RGD1309517
LOC102552193	0.001	0.001	1.61	0.001	1	1	1703.99	1	Z-004881	LOC102552193	gene		D:\assemblies\Rattus_norvegicus-Rnor_6.0-dbSNP149\Rattus_norvegicus-Rnor_6.0-dbSNP149.genometemplate\sequences\NC_005101_chr2.gbk#0	266435125	NC_005101.4	-	18852	115413345..115394494	102552193, 7552769		LOC102552193
Sec62	4.278	9.559	62.334	7.258	2.23456	1.31707	8.58846	0.589409	Z-004892	Sec62	gene		D:\assemblies\Rattus_norvegicus-Rnor_6.0-dbSNP149\Rattus_norvegicus-Rnor_6.0-dbSNP149.genometemplate\sequences\NC_005101_chr2.gbk#0	266435125	NC_005101.4	-	36775	116225510..116188736	294912, 1308862		Sec62	Ab2-292, Tloc1
Terc	0.001	0.012	0.619	0.001	12.5968	12.5968	655.292	1	Z-004906	Terc	gene		D:\assemblies\Rattus_norvegicus-Rnor_6.0-dbSNP149\Rattus_norvegicus-Rnor_6.0-dbSNP149.genometemplate\sequences\NC_005101_chr2.gbk#0	266435125	NC_005101.4	+	388	116432723..116433110	378461, 727802		Terc	Tr
Mrpl47	3.37	5.458	17.627	3.555	1.61975	1.53524	4.95807	0.947826	Z-004925	Mrpl47	gene		D:\assemblies\Rattus_norvegicus-Rnor_6.0-dbSNP149\Rattus_norvegicus-Rnor_6.0-dbSNP149.genometemplate\sequences\NC_005101_chr2.gbk#0	266435125	NC_005101.4	-	11141	119139451..119128311	294963, 1307531		Mrpl47
Ndufb5	14.866	44.116	95.849	19.883	2.96768	2.21876	4.82058	0.747639	Z-004926	Ndufb5	gene		D:\assemblies\Rattus_norvegicus-Rnor_6.0-dbSNP149\Rattus_norvegicus-Rnor_6.0-dbSNP149.genometemplate\sequences\NC_005101_chr2.gbk#0	266435125	NC_005101.4	+	14037	119139717..119153753	294964, 1305909		Ndufb5
LOC102551838	0.017	0.197	0.055	0.001	11.3499	208.871	57.8318	18.4029	Z-004944	LOC102551838	gene		D:\assemblies\Rattus_norvegicus-Rnor_6.0-dbSNP149\Rattus_norvegicus-Rnor_6.0-dbSNP149.genometemplate\sequences\NC_005101_chr2.gbk#0	266435125	NC_005101.4	-	8247	122299600..122291354	102551838, 7544750		LOC102551838
Mccc1	1.88	3.265	12.795	2.832	1.73681	1.15272	4.51762	0.663701	Z-004949	Mccc1	gene		D:\assemblies\Rattus_norvegicus-Rnor_6.0-dbSNP149\Rattus_norvegicus-Rnor_6.0-dbSNP149.genometemplate\sequences\NC_005101_chr2.gbk#0	266435125	NC_005101.4	-	139764	122690540..122550777	294972, 1310615		Mccc1
Trpc3	0.003	0.027	0.092	0.001	8.66776	28.9517	97.3326	3.34016	Z-004963	Trpc3	gene		D:\assemblies\Rattus_norvegicus-Rnor_6.0-dbSNP149\Rattus_norvegicus-Rnor_6.0-dbSNP149.genometemplate\sequences\NC_005101_chr2.gbk#0	266435125	NC_005101.4	-	137621	123467574..123329954	60395, 61973		Trpc3	TrpC3c, Trrp3
RGD1307100	0.41	0.423	1.93	0.374	1.03175	1.13135	5.15981	1.09654	Z-004964	RGD1307100	gene		D:\assemblies\Rattus_norvegicus-Rnor_6.0-dbSNP149\Rattus_norvegicus-Rnor_6.0-dbSNP149.genometemplate\sequences\NC_005101_chr2.gbk#0	266435125	NC_005101.4	+	210934	123555742..123766675	294978, 1307100		RGD1307100	RGD1309985, RGD1561393
Il2	0.001	0.001	0.673	0.001	1	1	711.894	1	Z-004966	Il2	gene		D:\assemblies\Rattus_norvegicus-Rnor_6.0-dbSNP149\Rattus_norvegicus-Rnor_6.0-dbSNP149.genometemplate\sequences\NC_005101_chr2.gbk#0	266435125	NC_005101.4	-	4705	123851854..123847150	116562, 620047		Il2
Il21	0.001	0.001	0.272	0.001	1	1	288.269	1	Z-004967	Il21	gene		D:\assemblies\Rattus_norvegicus-Rnor_6.0-dbSNP149\Rattus_norvegicus-Rnor_6.0-dbSNP149.genometemplate\sequences\NC_005101_chr2.gbk#0	266435125	NC_005101.4	-	7336	123972356..123965021	365769, 1307384		Il21	IL-21
Nudt6	0.039	1.955	8.937	0.644	49.5944	3.03554	13.878	0.0612073	Z-004971	Nudt6	gene		D:\assemblies\Rattus_norvegicus-Rnor_6.0-dbSNP149\Rattus_norvegicus-Rnor_6.0-dbSNP149.genometemplate\sequences\NC_005101_chr2.gbk#0	266435125	NC_005101.4	-	15524	124149824..124134301	207120, 621356		Nudt6	Gfg
Pabpc4l	0.008	3.409	0.001	0.472	434.315	7.22792	0.00200366	0.0166421	Z-005008	Pabpc4l	gene		D:\assemblies\Rattus_norvegicus-Rnor_6.0-dbSNP149\Rattus_norvegicus-Rnor_6.0-dbSNP149.genometemplate\sequences\NC_005101_chr2.gbk#0	266435125	NC_005101.4	-	1991	130658202..130656212	295010, 1559517		Pabpc4l	RGD1559517
LOC108350005	0.001	0.001	0.336	0.001	1	1	355.16	1	Z-005028	LOC108350005	gene		D:\assemblies\Rattus_norvegicus-Rnor_6.0-dbSNP149\Rattus_norvegicus-Rnor_6.0-dbSNP149.genometemplate\sequences\NC_005101_chr2.gbk#0	266435125	NC_005101.4	-	49146	139419752..139370607	108350005		LOC108350005
Slc7a11	0.001	0.004	1.157	0.001	4.4741	4.4741	1223.96	1	Z-005029	Slc7a11	gene		D:\assemblies\Rattus_norvegicus-Rnor_6.0-dbSNP149\Rattus_norvegicus-Rnor_6.0-dbSNP149.genometemplate\sequences\NC_005101_chr2.gbk#0	266435125	NC_005101.4	-	74706	139528479..139453774	310392, 1309275		Slc7a11
Noct	1.621	0.191	0.212	1.937	0.117561	0.0983296	0.109285	0.836414	Z-005038	Noct	gene		D:\assemblies\Rattus_norvegicus-Rnor_6.0-dbSNP149\Rattus_norvegicus-Rnor_6.0-dbSNP149.genometemplate\sequences\NC_005101_chr2.gbk#0	266435125	NC_005101.4	+	20209	140286661..140306869	310395, 1587344		Noct	Ccr4, Ccrn4l, Ccrn4lb
Exosc8	6.447	16.496	71.502	9.962	2.55863	1.6559	7.17767	0.647183	Z-005069	Exosc8	gene		D:\assemblies\Rattus_norvegicus-Rnor_6.0-dbSNP149\Rattus_norvegicus-Rnor_6.0-dbSNP149.genometemplate\sequences\NC_005101_chr2.gbk#0	266435125	NC_005101.4	-	6598	143932240..143925643	295050, 1306169		Exosc8
Alg5	1.306	0.088	9.346	0.995	0.0675637	0.0886803	9.39212	1.31254	Z-005070	Alg5	gene		D:\assemblies\Rattus_norvegicus-Rnor_6.0-dbSNP149\Rattus_norvegicus-Rnor_6.0-dbSNP149.genometemplate\sequences\NC_005101_chr2.gbk#0	266435125	NC_005101.4	+	14231	143932242..143946472	295051, 1308900		Alg5
Spg20	4.887	12.548	1.522	6.737	2.5676	1.86256	0.225899	0.725412	Z-005077	Spg20	gene		D:\assemblies\Rattus_norvegicus-Rnor_6.0-dbSNP149\Rattus_norvegicus-Rnor_6.0-dbSNP149.genometemplate\sequences\NC_005101_chr2.gbk#0	266435125	NC_005101.4	+	26587	144522382..144548968	295053, 1305900		Spg20
LOC102552778	0.007	0.065	0.001	0.309	8.99768	0.211184	0.00305407	0.023471	Z-005086	LOC102552778	gene		D:\assemblies\Rattus_norvegicus-Rnor_6.0-dbSNP149\Rattus_norvegicus-Rnor_6.0-dbSNP149.genometemplate\sequences\NC_005101_chr2.gbk#0	266435125	NC_005101.4	+	2552	145221431..145223982	102552778, 7664166		LOC102552778
Tm4sf4	0.005	0.069	0.001	0.527	13.4545	0.130776	0.0017931	0.00971992	Z-005092	Tm4sf4	gene		D:\assemblies\Rattus_norvegicus-Rnor_6.0-dbSNP149\Rattus_norvegicus-Rnor_6.0-dbSNP149.genometemplate\sequences\NC_005101_chr2.gbk#0	266435125	NC_005101.4	+	15223	147532032..147547254	116467, 621784		Tm4sf4	Lrtm4
Wwtr1	6.737	4.854	1.215	8.805	0.720597	0.551299	0.137974	0.765059	Z-005093	Wwtr1	gene		D:\assemblies\Rattus_norvegicus-Rnor_6.0-dbSNP149\Rattus_norvegicus-Rnor_6.0-dbSNP149.genometemplate\sequences\NC_005101_chr2.gbk#0	266435125	NC_005101.4	-	115885	147693033..147577149	295062, 1559609		Wwtr1
Erich6	0.001	0.004	0.174	0.001	4.14961	4.14961	184.628	1	Z-005106	Erich6	gene		D:\assemblies\Rattus_norvegicus-Rnor_6.0-dbSNP149\Rattus_norvegicus-Rnor_6.0-dbSNP149.genometemplate\sequences\NC_005101_chr2.gbk#0	266435125	NC_005101.4	-	49411	148861470..148812060	499626, 1559451		Erich6	Fam194a
Siah2	0.634	2.827	14.949	1.827	4.46067	1.54711	8.18157	0.346834	Z-005107	Siah2	gene		D:\assemblies\Rattus_norvegicus-Rnor_6.0-dbSNP149\Rattus_norvegicus-Rnor_6.0-dbSNP149.genometemplate\sequences\NC_005101_chr2.gbk#0	266435125	NC_005101.4	-	17750	148891900..148874151	140593, 620778		Siah2
Gpr171	0.046	0.008	17.428	0.327	0.167643	0.0233314	53.262	0.139174	Z-005111	Gpr171	gene		D:\assemblies\Rattus_norvegicus-Rnor_6.0-dbSNP149\Rattus_norvegicus-Rnor_6.0-dbSNP149.genometemplate\sequences\NC_005101_chr2.gbk#0	266435125	NC_005101.4	-	8611	149328055..149319445	688737, 1585271		Gpr171
P2ry1	1.704	0.283	0.001	1.545	0.16632	0.183382	0.000611722	1.10258	Z-005131	P2ry1	gene		D:\assemblies\Rattus_norvegicus-Rnor_6.0-dbSNP149\Rattus_norvegicus-Rnor_6.0-dbSNP149.genometemplate\sequences\NC_005101_chr2.gbk#0	266435125	NC_005101.4	+	5495	151314818..151320312	25265, 3242		P2ry1	P2y, P2y1
Rap2b	5.159	13.326	1.419	9.602	2.58311	1.38783	0.147825	0.537271	Z-005132	Rap2b	gene		D:\assemblies\Rattus_norvegicus-Rnor_6.0-dbSNP149\Rattus_norvegicus-Rnor_6.0-dbSNP149.genometemplate\sequences\NC_005101_chr2.gbk#0	266435125	NC_005101.4	+	552	151685251..151685802	170923, 620591		Rap2b
Slc33a1	0.206	1.746	2.688	0.648	8.46232	2.69527	4.14869	0.318502	Z-005144	Slc33a1	gene		D:\assemblies\Rattus_norvegicus-Rnor_6.0-dbSNP149\Rattus_norvegicus-Rnor_6.0-dbSNP149.genometemplate\sequences\NC_005101_chr2.gbk#0	266435125	NC_005101.4	-	22812	154542981..154520170	64018, 620653		Slc33a1	Acatn
LOC304239	0.017	0.129	0.476	0.083	7.77338	1.5583	5.7421	0.200467	Z-005170	LOC304239	gene		D:\assemblies\Rattus_norvegicus-Rnor_6.0-dbSNP149\Rattus_norvegicus-Rnor_6.0-dbSNP149.genometemplate\sequences\NC_005101_chr2.gbk#0	266435125	NC_005101.4	-	40019	157071062..157031044	304239, 1565198		LOC304239
Ccnl1	3.47	7.352	36.9	5.704	2.11858	1.28891	6.46871	0.608382	Z-005182	Ccnl1	gene		D:\assemblies\Rattus_norvegicus-Rnor_6.0-dbSNP149\Rattus_norvegicus-Rnor_6.0-dbSNP149.genometemplate\sequences\NC_005101_chr2.gbk#0	266435125	NC_005101.4	-	12544	157759838..157747295	114121, 620864		Ccnl1	Ania-6a, Ccnl
Veph1	0.206	0.082	0.001	0.354	0.398281	0.231208	0.00266871	0.580514	Z-005185	Veph1	gene		D:\assemblies\Rattus_norvegicus-Rnor_6.0-dbSNP149\Rattus_norvegicus-Rnor_6.0-dbSNP149.genometemplate\sequences\NC_005101_chr2.gbk#0	266435125	NC_005101.4	-	286884	158156266..157869383	361954, 1308217		Veph1	RGD1308217
Ptx3	1.896	4.047	0.001	1.289	2.13454	3.13899	0.000733113	1.47057	Z-005186	Ptx3	gene		D:\assemblies\Rattus_norvegicus-Rnor_6.0-dbSNP149\Rattus_norvegicus-Rnor_6.0-dbSNP149.genometemplate\sequences\NC_005101_chr2.gbk#0	266435125	NC_005101.4	+	5811	158097843..158103653	689388, 1593476		Ptx3
Shox2	7.116	3.28	0.001	6.199	0.461021	0.529179	0.000152464	1.14784	Z-005190	Shox2	gene		D:\assemblies\Rattus_norvegicus-Rnor_6.0-dbSNP149\Rattus_norvegicus-Rnor_6.0-dbSNP149.genometemplate\sequences\NC_005101_chr2.gbk#0	266435125	NC_005101.4	-	8609	164126783..164118175	25546, 3674		Shox2
LOC100362176	2.598	3.328	0.001	3.385	1.28099	0.983082	0.000279198	0.767436	Z-005200	LOC100362176	gene		D:\assemblies\Rattus_norvegicus-Rnor_6.0-dbSNP149\Rattus_norvegicus-Rnor_6.0-dbSNP149.genometemplate\sequences\NC_005101_chr2.gbk#0	266435125	NC_005101.4	+	2548	165486809..165489356	100362176, 2318708		LOC100362176
Nmd3	2.671	5.683	18.541	4.042	2.12743	1.40608	4.5874	0.660927	Z-005214	Nmd3	gene		D:\assemblies\Rattus_norvegicus-Rnor_6.0-dbSNP149\Rattus_norvegicus-Rnor_6.0-dbSNP149.genometemplate\sequences\NC_005101_chr2.gbk#0	266435125	NC_005101.4	+	25494	166402838..166428331	310512, 1308468		Nmd3	RGD1308468
Si	0.004	0.021	0.001	0.037	5.42342	0.566975	0.0253696	0.104542	Z-005220	Si	gene		D:\assemblies\Rattus_norvegicus-Rnor_6.0-dbSNP149\Rattus_norvegicus-Rnor_6.0-dbSNP149.genometemplate\sequences\NC_005101_chr2.gbk#0	266435125	NC_005101.4	-	80555	170301348..170220794	497756, 3675		Si	SUCIMAL
LOC108350043	0.535	2.017	0.001	0.499	3.77161	4.03919	0.00189291	1.07095	Z-005253	LOC108350043	gene		D:\assemblies\Rattus_norvegicus-Rnor_6.0-dbSNP149\Rattus_norvegicus-Rnor_6.0-dbSNP149.genometemplate\sequences\NC_005101_chr2.gbk#0	266435125	NC_005101.4	+	16520	178520260..178536779	108350043		LOC108350043
Pdgfc	0.562	2.378	0.001	0.928	4.23184	2.5629	0.00101874	0.605624	Z-005260	Pdgfc	gene		D:\assemblies\Rattus_norvegicus-Rnor_6.0-dbSNP149\Rattus_norvegicus-Rnor_6.0-dbSNP149.genometemplate\sequences\NC_005101_chr2.gbk#0	266435125	NC_005101.4	+	174671	179952227..180126897	79429, 68410		Pdgfc	SCDGF
Gucy1b3	4.869	11.702	0.324	6.569	2.4036	1.78149	0.0493014	0.741175	Z-005264	Gucy1b3	gene		D:\assemblies\Rattus_norvegicus-Rnor_6.0-dbSNP149\Rattus_norvegicus-Rnor_6.0-dbSNP149.genometemplate\sequences\NC_005101_chr2.gbk#0	266435125	NC_005101.4	-	49063	181026001..180976939	25202, 2769		Gucy1b3	Gucy1b1, SGC
Gucy1a3	6.44	8.81	0.922	7.518	1.36787	1.17176	0.122681	0.856633	Z-005265	Gucy1a3	gene		D:\assemblies\Rattus_norvegicus-Rnor_6.0-dbSNP149\Rattus_norvegicus-Rnor_6.0-dbSNP149.genometemplate\sequences\NC_005101_chr2.gbk#0	266435125	NC_005101.4	-	57628	181103321..181045694	497757, 68436		Gucy1a3	Gucy1a1, SGC
LOC499644	0.005	0.028	0.099	0.001	5.10596	29.1583	104.801	5.71064	Z-005267	LOC499644	gene		D:\assemblies\Rattus_norvegicus-Rnor_6.0-dbSNP149\Rattus_norvegicus-Rnor_6.0-dbSNP149.genometemplate\sequences\NC_005101_chr2.gbk#0	266435125	NC_005101.4	+	3691	181296061..181299751	499644, 1593166		LOC499644
LOC679811	1.287	1.177	40.318	1.562	0.914517	0.753206	25.8059	0.823611	Z-005285	LOC679811	gene		D:\assemblies\Rattus_norvegicus-Rnor_6.0-dbSNP149\Rattus_norvegicus-Rnor_6.0-dbSNP149.genometemplate\sequences\NC_005101_chr2.gbk#0	266435125	NC_005101.4	-	133942	183031273..182897332	679811, 1583677		LOC679811
Fhdc1	3.828	5.212	0.613	4.879	1.36159	1.0684	0.125576	0.784669	Z-005290	Fhdc1	gene		D:\assemblies\Rattus_norvegicus-Rnor_6.0-dbSNP149\Rattus_norvegicus-Rnor_6.0-dbSNP149.genometemplate\sequences\NC_005101_chr2.gbk#0	266435125	NC_005101.4	-	37213	183487820..183450608	295161, 1311955		Fhdc1	RGD1311955
LOC102551030	0.004	0.004	0.234	0.001	1.17911	4.63691	247.657	3.93257	Z-005296	LOC102551030	gene		D:\assemblies\Rattus_norvegicus-Rnor_6.0-dbSNP149\Rattus_norvegicus-Rnor_6.0-dbSNP149.genometemplate\sequences\NC_005101_chr2.gbk#0	266435125	NC_005101.4	+	7433	183798012..183805444	102551030, 7653266		LOC102551030
Cd5l	19.157	25.474	1.51	23.295	1.32971	1.09353	0.0648285	0.822384	Z-005327	Cd5l	gene		D:\assemblies\Rattus_norvegicus-Rnor_6.0-dbSNP149\Rattus_norvegicus-Rnor_6.0-dbSNP149.genometemplate\sequences\NC_005101_chr2.gbk#0	266435125	NC_005101.4	+	11014	186685104..186696117	310693, 1308526		Cd5l
Fcrl1	0.717	2.345	30.328	2.147	3.27209	1.09205	14.1257	0.333747	Z-005328	Fcrl1	gene		D:\assemblies\Rattus_norvegicus-Rnor_6.0-dbSNP149\Rattus_norvegicus-Rnor_6.0-dbSNP149.genometemplate\sequences\NC_005101_chr2.gbk#0	266435125	NC_005101.4	+	21895	186702311..186724205	680665, 1589411		Fcrl1
LOC108350053	0.195	1.145	4.278	0.209	5.86232	5.48335	20.4828	0.935355	Z-005329	LOC108350053	gene		D:\assemblies\Rattus_norvegicus-Rnor_6.0-dbSNP149\Rattus_norvegicus-Rnor_6.0-dbSNP149.genometemplate\sequences\NC_005101_chr2.gbk#0	266435125	NC_005101.4	-	15570	186764475..186748906	108350053		LOC108350053
Fcrl3	0.007	0.005	4.124	0.001	0.748099	5.76951	4363.87	7.71222	Z-005330	Fcrl3	gene		D:\assemblies\Rattus_norvegicus-Rnor_6.0-dbSNP149\Rattus_norvegicus-Rnor_6.0-dbSNP149.genometemplate\sequences\NC_005101_chr2.gbk#0	266435125	NC_005101.4	+	21435	186776466..186797900	680697, 1589379		Fcrl3
Ntrk1	0.001	0.004	0.24	0.001	4.75802	4.75802	253.799	1	Z-005339	Ntrk1	gene		D:\assemblies\Rattus_norvegicus-Rnor_6.0-dbSNP149\Rattus_norvegicus-Rnor_6.0-dbSNP149.genometemplate\sequences\NC_005101_chr2.gbk#0	266435125	NC_005101.4	-	16806	187160373..187143568	59109, 620144		Ntrk1	Trk
Hdgf	21.582	48.942	4.721	30.23	2.26771	1.61899	0.156186	0.713933	Z-005343	Hdgf	gene		D:\assemblies\Rattus_norvegicus-Rnor_6.0-dbSNP149\Rattus_norvegicus-Rnor_6.0-dbSNP149.genometemplate\sequences\NC_005101_chr2.gbk#0	266435125	NC_005101.4	+	9773	187274898..187284670	114499, 70961		Hdgf
mrpl24	5.967	10.83	57.175	9.228	1.81479	1.17356	6.19585	0.646665	Z-005344	mrpl24	gene		D:\assemblies\Rattus_norvegicus-Rnor_6.0-dbSNP149\Rattus_norvegicus-Rnor_6.0-dbSNP149.genometemplate\sequences\NC_005101_chr2.gbk#0	266435125	NC_005101.4	+	6217	187288460..187294676	295224, 1359289		mrpl24
LOC102547113	0.001	0.004	0.164	0.001	4.22298	4.22298	173.667	1	Z-005357	LOC102547113	gene		D:\assemblies\Rattus_norvegicus-Rnor_6.0-dbSNP149\Rattus_norvegicus-Rnor_6.0-dbSNP149.genometemplate\sequences\NC_005101_chr2.gbk#0	266435125	NC_005101.4	+	5946	187564786..187570731	102547113, 7658407		LOC102547113
Tmem79	0.006	0.006	0.089	0.001	1.07895	6.46681	94.4349	5.99363	Z-005366	Tmem79	gene		D:\assemblies\Rattus_norvegicus-Rnor_6.0-dbSNP149\Rattus_norvegicus-Rnor_6.0-dbSNP149.genometemplate\sequences\NC_005101_chr2.gbk#0	266435125	NC_005101.4	-	4931	187706452..187701522	310626, 1309886		Tmem79	RGD1309886
Lmna	27.978	61.536	5.388	35.467	2.19943	1.735	0.151911	0.788843	Z-005373	Lmna	gene		D:\assemblies\Rattus_norvegicus-Rnor_6.0-dbSNP149\Rattus_norvegicus-Rnor_6.0-dbSNP149.genometemplate\sequences\NC_005101_chr2.gbk#0	266435125	NC_005101.4	-	20669	187863552..187842884	60374, 620456		Lmna
Ubqln4	6.151	13.696	1.777	8.88	2.2266	1.54231	0.200059	0.692673	Z-005377	Ubqln4	gene		D:\assemblies\Rattus_norvegicus-Rnor_6.0-dbSNP149\Rattus_norvegicus-Rnor_6.0-dbSNP149.genometemplate\sequences\NC_005101_chr2.gbk#0	266435125	NC_005101.4	+	15335	187915701..187931035	310633, 1308273		Ubqln4	RGD1308273
Msto1	2.409	3.684	13.068	2.354	1.52914	1.56461	5.55042	1.02319	Z-005387	Msto1	gene		D:\assemblies\Rattus_norvegicus-Rnor_6.0-dbSNP149\Rattus_norvegicus-Rnor_6.0-dbSNP149.genometemplate\sequences\NC_005101_chr2.gbk#0	266435125	NC_005101.4	-	4272	188216482..188212211	295237, 1306110		Msto1	RGD1306110
Dap3	4.418	9.473	42.722	6.544	2.14433	1.44764	6.5285	0.675103	Z-005388	Dap3	gene		D:\assemblies\Rattus_norvegicus-Rnor_6.0-dbSNP149\Rattus_norvegicus-Rnor_6.0-dbSNP149.genometemplate\sequences\NC_005101_chr2.gbk#0	266435125	NC_005101.4	-	29718	188255324..188225607	295238, 1305339		Dap3
Fam189b	0.805	0.176	7.259	1.02	0.219184	0.173005	7.11623	0.789312	Z-005397	Fam189b	gene		D:\assemblies\Rattus_norvegicus-Rnor_6.0-dbSNP149\Rattus_norvegicus-Rnor_6.0-dbSNP149.genometemplate\sequences\NC_005101_chr2.gbk#0	266435125	NC_005101.4	+	6208	188495237..188501444	310640, 1306107		Fam189b	RGD1306107
Krtcap2	15.992	42.464	127.177	19.836	2.65528	2.14073	6.41134	0.806215	Z-005405	Krtcap2	gene		D:\assemblies\Rattus_norvegicus-Rnor_6.0-dbSNP149\Rattus_norvegicus-Rnor_6.0-dbSNP149.genometemplate\sequences\NC_005101_chr2.gbk#0	266435125	NC_005101.4	+	3997	188561548..188565544	295243, 1308413		Krtcap2
Slc50a1	2.969	5.913	32.488	4.451	1.99119	1.32841	7.29933	0.667146	Z-005407	Slc50a1	gene		D:\assemblies\Rattus_norvegicus-Rnor_6.0-dbSNP149\Rattus_norvegicus-Rnor_6.0-dbSNP149.genometemplate\sequences\NC_005101_chr2.gbk#0	266435125	NC_005101.4	-	2381	188587498..188585118	295245, 1308478		Slc50a1	Rag1ap1, RGD1308478
LOC102550325	0.007	1.337	0.001	0.379	183.567	3.5318	0.0024968	0.0192398	Z-005409	LOC102550325	gene		D:\assemblies\Rattus_norvegicus-Rnor_6.0-dbSNP149\Rattus_norvegicus-Rnor_6.0-dbSNP149.genometemplate\sequences\NC_005101_chr2.gbk#0	266435125	NC_005101.4	-	1358	188601934..188600577	102550325, 7747030		LOC102550325
Dcst1	0.001	0.051	0.049	0.001	53.9949	53.9949	51.9494	1	Z-005414	Dcst1	gene		D:\assemblies\Rattus_norvegicus-Rnor_6.0-dbSNP149\Rattus_norvegicus-Rnor_6.0-dbSNP149.genometemplate\sequences\NC_005101_chr2.gbk#0	266435125	NC_005101.4	-	17456	188690004..188672549	295246, 1307756		Dcst1
Lenep	0.012	0.216	2.209	0.001	17.8591	228.194	2337.46	12.7775	Z-005417	Lenep	gene		D:\assemblies\Rattus_norvegicus-Rnor_6.0-dbSNP149\Rattus_norvegicus-Rnor_6.0-dbSNP149.genometemplate\sequences\NC_005101_chr2.gbk#0	266435125	NC_005101.4	-	667	188727670..188727004	113917, 69433		Lenep	Elp, Lep503
Flad1	2.507	3.827	26.548	3.209	1.52654	1.19274	8.27382	0.781337	Z-005418	Flad1	gene		D:\assemblies\Rattus_norvegicus-Rnor_6.0-dbSNP149\Rattus_norvegicus-Rnor_6.0-dbSNP149.genometemplate\sequences\NC_005101_chr2.gbk#0	266435125	NC_005101.4	-	9469	188736462..188726994	751787, 1593292		Flad1
Shc1	19.526	27.603	4.033	26.564	1.41361	1.03909	0.151824	0.735061	Z-005420	Shc1	gene		D:\assemblies\Rattus_norvegicus-Rnor_6.0-dbSNP149\Rattus_norvegicus-Rnor_6.0-dbSNP149.genometemplate\sequences\NC_005101_chr2.gbk#0	266435125	NC_005101.4	+	11564	188745503..188757066	85385, 620446		Shc1	P66shc
Pygo2	4.598	6.3	0.674	5.803	1.36995	1.08553	0.116109	0.792387	Z-005421	Pygo2	gene		D:\assemblies\Rattus_norvegicus-Rnor_6.0-dbSNP149\Rattus_norvegicus-Rnor_6.0-dbSNP149.genometemplate\sequences\NC_005101_chr2.gbk#0	266435125	NC_005101.4	+	5119	188757167..188762285	295251, 1308535		Pygo2	RGD1308535
Rps27	945.976	2829.72	6303.67	1144.02	2.99132	2.47348	5.51008	0.826885	Z-005442	Rps27	gene		D:\assemblies\Rattus_norvegicus-Rnor_6.0-dbSNP149\Rattus_norvegicus-Rnor_6.0-dbSNP149.genometemplate\sequences\NC_005101_chr2.gbk#0	266435125	NC_005101.4	-	1106	189573280..189572175	94266, 621045		Rps27
Jtb	12.175	11.563	50.979	11.469	0.949725	1.00822	4.44505	1.06159	Z-005444	Jtb	gene		D:\assemblies\Rattus_norvegicus-Rnor_6.0-dbSNP149\Rattus_norvegicus-Rnor_6.0-dbSNP149.genometemplate\sequences\NC_005101_chr2.gbk#0	266435125	NC_005101.4	+	4220	189591707..189595926	29439, 2942		Jtb
Slc27a3	4.302	6.763	1.201	5.323	1.57207	1.27055	0.225582	0.808204	Z-005451	Slc27a3	gene		D:\assemblies\Rattus_norvegicus-Rnor_6.0-dbSNP149\Rattus_norvegicus-Rnor_6.0-dbSNP149.genometemplate\sequences\NC_005101_chr2.gbk#0	266435125	NC_005101.4	-	4669	189765415..189760747	295219, 1310605		Slc27a3
S100a1	2.426	4.761	27.002	1.341	1.96223	3.55039	20.137	1.80936	Z-005470	S100a1	gene		D:\assemblies\Rattus_norvegicus-Rnor_6.0-dbSNP149\Rattus_norvegicus-Rnor_6.0-dbSNP149.genometemplate\sequences\NC_005101_chr2.gbk#0	266435125	NC_005101.4	-	4844	189905348..189900505	295214, 3614		S100a1
S100a13	21.255	32.193	247.136	21.036	1.51459	1.53035	11.7481	1.01041	Z-005471	S100a13	gene		D:\assemblies\Rattus_norvegicus-Rnor_6.0-dbSNP149\Rattus_norvegicus-Rnor_6.0-dbSNP149.genometemplate\sequences\NC_005101_chr2.gbk#0	266435125	NC_005101.4	+	6495	189906022..189912516	295213, 1304919		S100a13	S100A1
S100a16	40.895	81.677	6.46	46.264	1.99725	1.76544	0.139627	0.883936	Z-005472	S100a16	gene		D:\assemblies\Rattus_norvegicus-Rnor_6.0-dbSNP149\Rattus_norvegicus-Rnor_6.0-dbSNP149.genometemplate\sequences\NC_005101_chr2.gbk#0	266435125	NC_005101.4	+	5711	189923140..189928850	361991, 1306770		S100a16
S100a5	0.001	0.001	19.925	0.001	1	1	21081.4	1	Z-005475	S100a5	gene		D:\assemblies\Rattus_norvegicus-Rnor_6.0-dbSNP149\Rattus_norvegicus-Rnor_6.0-dbSNP149.genometemplate\sequences\NC_005101_chr2.gbk#0	266435125	NC_005101.4	+	6209	189999669..190005877	295211, 1308996		S100a5
S100a9	1777.3	7089.36	0.537	2453.11	3.98885	2.88995	0.000218922	0.724507	Z-005479	S100a9	gene		D:\assemblies\Rattus_norvegicus-Rnor_6.0-dbSNP149\Rattus_norvegicus-Rnor_6.0-dbSNP149.genometemplate\sequences\NC_005101_chr2.gbk#0	266435125	NC_005101.4	-	2774	190100209..190097436	94195, 620267		S100a9	Mrp14
LOC102549828	0.001	0.001	0.117	0.001	1	1	123.43	1	Z-005518	LOC102549828	gene		D:\assemblies\Rattus_norvegicus-Rnor_6.0-dbSNP149\Rattus_norvegicus-Rnor_6.0-dbSNP149.genometemplate\sequences\NC_005101_chr2.gbk#0	266435125	NC_005101.4	-	617	193052020..193051404	102549828, 7738003		LOC102549828
LOC102549724	0.001	0.001	0.117	0.001	1	1	123.43	1	Z-005519	LOC102549724	gene		D:\assemblies\Rattus_norvegicus-Rnor_6.0-dbSNP149\Rattus_norvegicus-Rnor_6.0-dbSNP149.genometemplate\sequences\NC_005101_chr2.gbk#0	266435125	NC_005101.4	-	1635	193064393..193062759	102549724, 7541409		LOC102549724
LOC103689947	12.853	25.652	1.335	19.7	1.99578	1.30212	0.0677799	0.652435	Z-005559	LOC103689947	gene		D:\assemblies\Rattus_norvegicus-Rnor_6.0-dbSNP149\Rattus_norvegicus-Rnor_6.0-dbSNP149.genometemplate\sequences\NC_005101_chr2.gbk#0	266435125	NC_005101.4	-	7194	195423665..195416472	103689947, 9292945		LOC103689947
Rorc	0.001	0.001	0.331	0.001	1	1	349.741	1	Z-005564	Rorc	gene		D:\assemblies\Rattus_norvegicus-Rnor_6.0-dbSNP149\Rattus_norvegicus-Rnor_6.0-dbSNP149.genometemplate\sequences\NC_005101_chr2.gbk#0	266435125	NC_005101.4	+	24327	195612471..195636797	368158, 1595785		Rorc
LOC102547008	0.001	0.001	2.007	0.001	1	1	2123.72	1	Z-005584	LOC102547008	gene		D:\assemblies\Rattus_norvegicus-Rnor_6.0-dbSNP149\Rattus_norvegicus-Rnor_6.0-dbSNP149.genometemplate\sequences\NC_005101_chr2.gbk#0	266435125	NC_005101.4	-	977	196161673..196160697	102547008, 7708651		LOC102547008
Psmd4	21.488	48.938	124.731	28.486	2.27746	1.71797	4.37873	0.754335	Z-005586	Psmd4	gene		D:\assemblies\Rattus_norvegicus-Rnor_6.0-dbSNP149\Rattus_norvegicus-Rnor_6.0-dbSNP149.genometemplate\sequences\NC_005101_chr2.gbk#0	266435125	NC_005101.4	-	9267	196207569..196198303	83499, 621109		Psmd4
Pip5k1a	5.02	4.987	1.027	4.663	0.993488	1.06956	0.220227	1.07658	Z-005587	Pip5k1a	gene		D:\assemblies\Rattus_norvegicus-Rnor_6.0-dbSNP149\Rattus_norvegicus-Rnor_6.0-dbSNP149.genometemplate\sequences\NC_005101_chr2.gbk#0	266435125	NC_005101.4	-	43281	196270949..196227669	365865, 1306127		Pip5k1a	Pip5k1b
Mrps21	28.601	52.616	143.77	30.703	1.83966	1.71371	4.68263	0.931533	Z-005620	Mrps21	gene		D:\assemblies\Rattus_norvegicus-Rnor_6.0-dbSNP149\Rattus_norvegicus-Rnor_6.0-dbSNP149.genometemplate\sequences\NC_005101_chr2.gbk#0	266435125	NC_005101.4	-	7628	197982385..197974758	689432, 1592330		Mrps21
Hist2h2ac	0.606	0.076	7.924	0.522	0.125784	0.146201	15.1891	1.16232	Z-005636	Hist2h2ac	gene		D:\assemblies\Rattus_norvegicus-Rnor_6.0-dbSNP149\Rattus_norvegicus-Rnor_6.0-dbSNP149.genometemplate\sequences\NC_005101_chr2.gbk#0	266435125	NC_005101.4	-	465	198360735..198360271	499675, 1560965		Hist2h2ac
Hist2h3c2	0.007	0.051	2.348	0.428	7.73334	0.1191	5.48489	0.0154009	Z-005641	Hist2h3c2	gene		D:\assemblies\Rattus_norvegicus-Rnor_6.0-dbSNP149\Rattus_norvegicus-Rnor_6.0-dbSNP149.genometemplate\sequences\NC_005101_chr2.gbk#0	266435125	NC_005101.4	+	28052	198390024..198418075	310678, 1306445		Hist2h3c2
Fcgr1a	12.346	23.538	1.606	14.683	1.9066	1.60313	0.109369	0.840834	Z-005644	Fcgr1a	gene		D:\assemblies\Rattus_norvegicus-Rnor_6.0-dbSNP149\Rattus_norvegicus-Rnor_6.0-dbSNP149.genometemplate\sequences\NC_005101_chr2.gbk#0	266435125	NC_005101.4	-	8918	198439453..198430536	295279, 1309912		Fcgr1a	FcgammaRI, Fcgr1, Fcgr1b
Txnip	98.989	134.934	23.943	118.962	1.36312	1.13426	0.201269	0.832109	Z-005690	Txnip	gene		D:\assemblies\Rattus_norvegicus-Rnor_6.0-dbSNP149\Rattus_norvegicus-Rnor_6.0-dbSNP149.genometemplate\sequences\NC_005101_chr2.gbk#0	266435125	NC_005101.4	+	3804	198683168..198686971	117514, 620886		Txnip	Vdup1
Lix1l	6.894	8.852	1.184	9.574	1.28399	0.924525	0.123701	0.720039	Z-005693	Lix1l	gene		D:\assemblies\Rattus_norvegicus-Rnor_6.0-dbSNP149\Rattus_norvegicus-Rnor_6.0-dbSNP149.genometemplate\sequences\NC_005101_chr2.gbk#0	266435125	NC_005101.4	+	25878	198726110..198751987	499677, 1593161		Lix1l
Nudt17	0.006	0.008	3.704	0.001	1.34974	8.09065	3918.58	5.99424	Z-005699	Nudt17	gene		D:\assemblies\Rattus_norvegicus-Rnor_6.0-dbSNP149\Rattus_norvegicus-Rnor_6.0-dbSNP149.genometemplate\sequences\NC_005101_chr2.gbk#0	266435125	NC_005101.4	-	4646	198836191..198831546	502584, 1565469		Nudt17	RGD1565469
Cd160	0.001	0.001	2.616	0.001	1	1	2767.88	1	Z-005702	Cd160	gene		D:\assemblies\Rattus_norvegicus-Rnor_6.0-dbSNP149\Rattus_norvegicus-Rnor_6.0-dbSNP149.genometemplate\sequences\NC_005101_chr2.gbk#0	266435125	NC_005101.4	-	31700	198965380..198933681	502585, 1563598		Cd160
Acp6	1.812	4.809	26.247	2.056	2.6545	2.33845	12.7634	0.880939	Z-005710	Acp6	gene		D:\assemblies\Rattus_norvegicus-Rnor_6.0-dbSNP149\Rattus_norvegicus-Rnor_6.0-dbSNP149.genometemplate\sequences\NC_005101_chr2.gbk#0	266435125	NC_005101.4	+	21617	199284177..199305793	295305, 1306336		Acp6
LOC690468	84.501	231.42	2821.84	106.003	2.73865	2.18315	26.6205	0.797164	Z-005714	LOC690468	gene		D:\assemblies\Rattus_norvegicus-Rnor_6.0-dbSNP149\Rattus_norvegicus-Rnor_6.0-dbSNP149.genometemplate\sequences\NC_005101_chr2.gbk#0	266435125	NC_005101.4	-	325	199479316..199478992	690468, 1596041		LOC690468
Gdap2	2.767	8.821	0.723	4.709	3.18765	1.87339	0.153496	0.587703	Z-005746	Gdap2	gene		D:\assemblies\Rattus_norvegicus-Rnor_6.0-dbSNP149\Rattus_norvegicus-Rnor_6.0-dbSNP149.genometemplate\sequences\NC_005101_chr2.gbk#0	266435125	NC_005101.4	+	56365	202470485..202526849	362004, 1306050		Gdap2
Trim45	0.311	0.005	2.228	0.503	0.0160878	0.00995503	4.4304	0.618794	Z-005755	Trim45	gene		D:\assemblies\Rattus_norvegicus-Rnor_6.0-dbSNP149\Rattus_norvegicus-Rnor_6.0-dbSNP149.genometemplate\sequences\NC_005101_chr2.gbk#0	266435125	NC_005101.4	+	8695	203301838..203310532	295323, 1309168		Trim45
Cd2	2.097	3.217	118.066	1.911	1.53395	1.68327	61.7765	1.09735	Z-005760	Cd2	gene		D:\assemblies\Rattus_norvegicus-Rnor_6.0-dbSNP149\Rattus_norvegicus-Rnor_6.0-dbSNP149.genometemplate\sequences\NC_005101_chr2.gbk#0	266435125	NC_005101.4	-	13368	203680073..203666706	497761, 2297		Cd2	CD2R, LFA-2, LFA2, OX-34, OX34
Mab21l3	0.001	0.001	0.124	0.001	1	1	130.709	1	Z-005765	Mab21l3	gene		D:\assemblies\Rattus_norvegicus-Rnor_6.0-dbSNP149\Rattus_norvegicus-Rnor_6.0-dbSNP149.genometemplate\sequences\NC_005101_chr2.gbk#0	266435125	NC_005101.4	-	37300	204269235..204231936	295326, 1308694		Mab21l3	RGD1308694
Ampd1	0.007	0.006	0.101	0.001	0.879645	6.13604	106.909	6.97559	Z-005781	Ampd1	gene		D:\assemblies\Rattus_norvegicus-Rnor_6.0-dbSNP149\Rattus_norvegicus-Rnor_6.0-dbSNP149.genometemplate\sequences\NC_005101_chr2.gbk#0	266435125	NC_005101.4	+	21028	205568934..205589961	25028, 2109		Ampd1	Ampd01, RATAMPD01
Hipk1	6.088	4.372	1.532	6.438	0.718134	0.679072	0.237992	0.945605	Z-005791	Hipk1	gene		D:\assemblies\Rattus_norvegicus-Rnor_6.0-dbSNP149\Rattus_norvegicus-Rnor_6.0-dbSNP149.genometemplate\sequences\NC_005101_chr2.gbk#0	266435125	NC_005101.4	-	50896	206274910..206224015	365895, 1304941		Hipk1
Ptpn22	0.692	0.718	44.881	0.64	1.03818	1.12234	70.1192	1.08106	Z-005796	Ptpn22	gene		D:\assemblies\Rattus_norvegicus-Rnor_6.0-dbSNP149\Rattus_norvegicus-Rnor_6.0-dbSNP149.genometemplate\sequences\NC_005101_chr2.gbk#0	266435125	NC_005101.4	+	48283	206342066..206390348	295338, 1307992		Ptpn22	Ptpn8
Magi3	1.434	1.697	0.392	1.858	1.1836	0.913452	0.21074	0.771755	Z-005799	Magi3	gene		D:\assemblies\Rattus_norvegicus-Rnor_6.0-dbSNP149\Rattus_norvegicus-Rnor_6.0-dbSNP149.genometemplate\sequences\NC_005101_chr2.gbk#0	266435125	NC_005101.4	-	199639	206699105..206499467	245903, 621362		Magi3	Slipr
Slc16a1	2.585	4.33	0.542	3.253	1.67511	1.33132	0.166519	0.794766	Z-005810	Slc16a1	gene		D:\assemblies\Rattus_norvegicus-Rnor_6.0-dbSNP149\Rattus_norvegicus-Rnor_6.0-dbSNP149.genometemplate\sequences\NC_005101_chr2.gbk#0	266435125	NC_005101.4	+	20801	207108552..207129352	25027, 3690		Slc16a1	MCT1, RATMCT1, RNMCT1
Fam19a3	0.001	0.009	1.474	0.001	9.24877	9.24877	1559.81	1	Z-005814	Fam19a3	gene		D:\assemblies\Rattus_norvegicus-Rnor_6.0-dbSNP149\Rattus_norvegicus-Rnor_6.0-dbSNP149.genometemplate\sequences\NC_005101_chr2.gbk#0	266435125	NC_005101.4	-	9963	207258962..207249000	691123, 1587462		Fam19a3
Ddx20	0.952	1.323	7.045	1.531	1.39025	0.864228	4.60223	0.621634	Z-005829	Ddx20	gene		D:\assemblies\Rattus_norvegicus-Rnor_6.0-dbSNP149\Rattus_norvegicus-Rnor_6.0-dbSNP149.genometemplate\sequences\NC_005101_chr2.gbk#0	266435125	NC_005101.4	-	10623	208154764..208144142	84473, 621744		Ddx20	Dp103
Adora3	0.001	0.006	0.232	0.001	6.64655	6.64655	245.132	1	Z-005834	Adora3	gene		D:\assemblies\Rattus_norvegicus-Rnor_6.0-dbSNP149\Rattus_norvegicus-Rnor_6.0-dbSNP149.genometemplate\sequences\NC_005101_chr2.gbk#0	266435125	NC_005101.4	+	42309	208336909..208379217	25370, 2051		Adora3	Tgpcr1
LOC100911796	0.001	0.006	0.232	0.001	6.64988	6.64988	245.458	1	Z-005839	LOC100911796	gene		D:\assemblies\Rattus_norvegicus-Rnor_6.0-dbSNP149\Rattus_norvegicus-Rnor_6.0-dbSNP149.genometemplate\sequences\NC_005101_chr2.gbk#0	266435125	NC_005101.4	+	44680	208492231..208536910	100911796, 6491091		LOC100911796
LOC102553341	0.442	2.363	3.473	0.536	5.34678	4.40652	6.47551	0.824144	Z-005844	LOC102553341	gene		D:\assemblies\Rattus_norvegicus-Rnor_6.0-dbSNP149\Rattus_norvegicus-Rnor_6.0-dbSNP149.genometemplate\sequences\NC_005101_chr2.gbk#0	266435125	NC_005101.4	-	7766	208594719..208586954	102553341, 7574969		LOC102553341
LOC102555268	0.001	0.004	7.766	0.001	4.3216	4.3216	8217.12	1	Z-005851	LOC102555268	gene		D:\assemblies\Rattus_norvegicus-Rnor_6.0-dbSNP149\Rattus_norvegicus-Rnor_6.0-dbSNP149.genometemplate\sequences\NC_005101_chr2.gbk#0	266435125	NC_005101.4	-	28181	209082897..209054717	102555268, 7544832		LOC102555268
LOC100912312	0.007	0.801	198.678	0.247	118.311	3.24799	805.546	0.0274529	Z-005852	LOC100912312	gene		D:\assemblies\Rattus_norvegicus-Rnor_6.0-dbSNP149\Rattus_norvegicus-Rnor_6.0-dbSNP149.genometemplate\sequences\NC_005101_chr2.gbk#0	266435125	NC_005101.4	-	4571	209100185..209095615	100912312, 6487716		LOC100912312
Dennd2d	1.837	6.494	16.319	1.352	3.53464	4.80454	12.074	1.35927	Z-005853	Dennd2d	gene		D:\assemblies\Rattus_norvegicus-Rnor_6.0-dbSNP149\Rattus_norvegicus-Rnor_6.0-dbSNP149.genometemplate\sequences\NC_005101_chr2.gbk#0	266435125	NC_005101.4	+	19085	209097894..209116978	310772, 1305120		Dennd2d	RGD1305120
Dram2	1.903	5.019	14.23	2.708	2.63707	1.85348	5.25545	0.702854	Z-005855	Dram2	gene		D:\assemblies\Rattus_norvegicus-Rnor_6.0-dbSNP149\Rattus_norvegicus-Rnor_6.0-dbSNP149.genometemplate\sequences\NC_005101_chr2.gbk#0	266435125	NC_005101.4	+	28741	209160901..209189641	362011, 1564099		Dram2	Tmem77
Cd53	9.263	9.093	45.91	6.755	0.98165	1.34618	6.79644	1.37134	Z-005857	Cd53	gene		D:\assemblies\Rattus_norvegicus-Rnor_6.0-dbSNP149\Rattus_norvegicus-Rnor_6.0-dbSNP149.genometemplate\sequences\NC_005101_chr2.gbk#0	266435125	NC_005101.4	-	47820	209537098..209489279	24251, 2310		Cd53	Ox-44, OX44
Csf1	4.191	6.934	0.939	5.674	1.65465	1.2221	0.16545	0.738585	Z-005882	Csf1	gene		D:\assemblies\Rattus_norvegicus-Rnor_6.0-dbSNP149\Rattus_norvegicus-Rnor_6.0-dbSNP149.genometemplate\sequences\NC_005101_chr2.gbk#0	266435125	NC_005101.4	-	28177	210550546..210522370	78965, 621063		Csf1
Gstm3	29.861	70.757	0.927	45.066	2.36955	1.57009	0.0205636	0.662609	Z-005885	Gstm3	gene		D:\assemblies\Rattus_norvegicus-Rnor_6.0-dbSNP149\Rattus_norvegicus-Rnor_6.0-dbSNP149.genometemplate\sequences\NC_005101_chr2.gbk#0	266435125	NC_005101.4	+	3070	210685204..210688273	108348148		Gstm3
Gstm2	20.971	35.783	4.789	35.319	1.70633	1.01314	0.135585	0.593754	Z-005892	Gstm2	gene		D:\assemblies\Rattus_norvegicus-Rnor_6.0-dbSNP149\Rattus_norvegicus-Rnor_6.0-dbSNP149.genometemplate\sequences\NC_005101_chr2.gbk#0	266435125	NC_005101.4	-	4767	210782807..210778041	24424, 2756		Gstm2	GSTA4
Atxn7l2	0.628	0.095	6.567	0.765	0.151803	0.124633	8.58812	0.821023	Z-005902	Atxn7l2	gene		D:\assemblies\Rattus_norvegicus-Rnor_6.0-dbSNP149\Rattus_norvegicus-Rnor_6.0-dbSNP149.genometemplate\sequences\NC_005101_chr2.gbk#0	266435125	NC_005101.4	-	8384	211001287..210992904	310781, 1307047		Atxn7l2
Sort1	3.459	3.123	0.292	3.106	0.902995	1.00568	0.0941478	1.11372	Z-005905	Sort1	gene		D:\assemblies\Rattus_norvegicus-Rnor_6.0-dbSNP149\Rattus_norvegicus-Rnor_6.0-dbSNP149.genometemplate\sequences\NC_005101_chr2.gbk#0	266435125	NC_005101.4	+	78221	211078092..211156312	83576, 619999		Sort1	Nt3, Nts3
Slc25a24	3.366	7.109	0.422	2.771	2.11172	2.56543	0.152225	1.21485	Z-005928	Slc25a24	gene		D:\assemblies\Rattus_norvegicus-Rnor_6.0-dbSNP149\Rattus_norvegicus-Rnor_6.0-dbSNP149.genometemplate\sequences\NC_005101_chr2.gbk#0	266435125	NC_005101.4	+	37141	211930371..211967511	310791, 1311982		Slc25a24
LOC102548358	0.071	0.001	1.064	0.001	0.0133792	1	1125.46	74.7429	Z-005946	LOC102548358	gene		D:\assemblies\Rattus_norvegicus-Rnor_6.0-dbSNP149\Rattus_norvegicus-Rnor_6.0-dbSNP149.genometemplate\sequences\NC_005101_chr2.gbk#0	266435125	NC_005101.4	-	4160	218730361..218726202	102548358, 7567274		LOC102548358
LOC100912479	0.001	0.001	0.915	0.001	1	1	968.507	1	Z-005951	LOC100912479	gene		D:\assemblies\Rattus_norvegicus-Rnor_6.0-dbSNP149\Rattus_norvegicus-Rnor_6.0-dbSNP149.genometemplate\sequences\NC_005101_chr2.gbk#0	266435125	NC_005101.4	-	6206	219097828..219091623	100912479, 6486580		LOC100912479
LOC102548573	0.007	0.072	0.001	0.737	9.86669	0.0973617	0.00128307	0.00986772	Z-005966	LOC102548573	gene		D:\assemblies\Rattus_norvegicus-Rnor_6.0-dbSNP149\Rattus_norvegicus-Rnor_6.0-dbSNP149.genometemplate\sequences\NC_005101_chr2.gbk#0	266435125	NC_005101.4	-	1584	220413049..220411466	102548573, 7718047		LOC102548573
Palmd	1.849	1.822	0.329	3.199	0.985411	0.569369	0.102778	0.577799	Z-005968	Palmd	gene		D:\assemblies\Rattus_norvegicus-Rnor_6.0-dbSNP149\Rattus_norvegicus-Rnor_6.0-dbSNP149.genometemplate\sequences\NC_005101_chr2.gbk#0	266435125	NC_005101.4	-	54713	220536004..220481292	310811, 1305624		Palmd
LOC103691682	0.001	0.001	0.625	0.001	1	1	661.565	1	Z-005980	LOC103691682	gene		D:\assemblies\Rattus_norvegicus-Rnor_6.0-dbSNP149\Rattus_norvegicus-Rnor_6.0-dbSNP149.genometemplate\sequences\NC_005101_chr2.gbk#0	266435125	NC_005101.4	-	3063	222937839..222934777	103691682		LOC103691682
LOC103691703	0.001	0.001	0.355	0.001	1	1	376.03	1	Z-005982	LOC103691703	gene		D:\assemblies\Rattus_norvegicus-Rnor_6.0-dbSNP149\Rattus_norvegicus-Rnor_6.0-dbSNP149.genometemplate\sequences\NC_005101_chr2.gbk#0	266435125	NC_005101.4	+	531	223121380..223121910	103691703		LOC103691703
LOC103691684	0.001	0.001	0.073	0.001	1	1	77.5756	1	Z-005985	LOC103691684	gene		D:\assemblies\Rattus_norvegicus-Rnor_6.0-dbSNP149\Rattus_norvegicus-Rnor_6.0-dbSNP149.genometemplate\sequences\NC_005101_chr2.gbk#0	266435125	NC_005101.4	+	15351	223576500..223591850	103691684, 9266109		LOC103691684
Arhgap29	4.114	4.636	0.927	5.463	1.12692	0.8485	0.169593	0.752936	Z-006004	Arhgap29	gene		D:\assemblies\Rattus_norvegicus-Rnor_6.0-dbSNP149\Rattus_norvegicus-Rnor_6.0-dbSNP149.genometemplate\sequences\NC_005101_chr2.gbk#0	266435125	NC_005101.4	+	61275	225552075..225613349	310833, 1306185		Arhgap29	B130017i01rik, RGD1306185
Gclm	16.488	26.756	4.382	22.48	1.62282	1.19024	0.194924	0.733439	Z-006008	Gclm	gene		D:\assemblies\Rattus_norvegicus-Rnor_6.0-dbSNP149\Rattus_norvegicus-Rnor_6.0-dbSNP149.genometemplate\sequences\NC_005101_chr2.gbk#0	266435125	NC_005101.4	+	20373	225827504..225847876	29739, 619871		Gclm	Glclr
Pde5a	6.819	9.707	0.041	9.071	1.42347	1.07015	0.00453938	0.751792	Z-006015	Pde5a	gene		D:\assemblies\Rattus_norvegicus-Rnor_6.0-dbSNP149\Rattus_norvegicus-Rnor_6.0-dbSNP149.genometemplate\sequences\NC_005101_chr2.gbk#0	266435125	NC_005101.4	+	145313	226899604..227044916	171115, 620995		Pde5a	PDE5A2
Fabp2	0.001	0.001	0.79	0.001	1	1	836.057	1	Z-006017	Fabp2	gene		D:\assemblies\Rattus_norvegicus-Rnor_6.0-dbSNP149\Rattus_norvegicus-Rnor_6.0-dbSNP149.genometemplate\sequences\NC_005101_chr2.gbk#0	266435125	NC_005101.4	+	2743	227080912..227083654	25598, 2591		Fabp2	FABP
LOC103691688	3.421	7.961	27.531	2.967	2.32724	2.68325	9.27952	1.15297	Z-006026	LOC103691688	gene		D:\assemblies\Rattus_norvegicus-Rnor_6.0-dbSNP149\Rattus_norvegicus-Rnor_6.0-dbSNP149.genometemplate\sequences\NC_005101_chr2.gbk#0	266435125	NC_005101.4	-	2264	227721052..227718789	103691688, 9101468		LOC103691688
Ank2	0.329	0.36	0.042	0.349	1.09388	1.03153	0.121002	0.943007	Z-006045	Ank2	gene		D:\assemblies\Rattus_norvegicus-Rnor_6.0-dbSNP149\Rattus_norvegicus-Rnor_6.0-dbSNP149.genometemplate\sequences\NC_005101_chr2.gbk#0	266435125	NC_005101.4	-	298013	231522655..231224643	362036, 620156		Ank2
Enpep	2.524	1.367	0.263	2.443	0.541831	0.559681	0.107642	1.03294	Z-006064	Enpep	gene		D:\assemblies\Rattus_norvegicus-Rnor_6.0-dbSNP149\Rattus_norvegicus-Rnor_6.0-dbSNP149.genometemplate\sequences\NC_005101_chr2.gbk#0	266435125	NC_005101.4	-	76614	233743866..233667253	64017, 621228		Enpep
Lef1	0.551	1.623	8.645	0.601	2.94407	2.69858	14.3752	0.916617	Z-006087	Lef1	gene		D:\assemblies\Rattus_norvegicus-Rnor_6.0-dbSNP149\Rattus_norvegicus-Rnor_6.0-dbSNP149.genometemplate\sequences\NC_005101_chr2.gbk#0	266435125	NC_005101.4	+	112947	236232115..236345061	161452, 620241		Lef1
LOC102553582	0.001	0.029	0.247	0.001	31.1625	31.1625	260.84	1	Z-006108	LOC102553582	gene		D:\assemblies\Rattus_norvegicus-Rnor_6.0-dbSNP149\Rattus_norvegicus-Rnor_6.0-dbSNP149.genometemplate\sequences\NC_005101_chr2.gbk#0	266435125	NC_005101.4	-	1293	237925445..237924153	102553582, 7698848		LOC102553582
LOC102546359	0.001	0.19	0.216	0.001	201.392	201.392	228.81	1	Z-006116	LOC102546359	gene		D:\assemblies\Rattus_norvegicus-Rnor_6.0-dbSNP149\Rattus_norvegicus-Rnor_6.0-dbSNP149.genometemplate\sequences\NC_005101_chr2.gbk#0	266435125	NC_005101.4	-	1460	238527420..238525961	102546359, 7572082		LOC102546359
LOC100362967	0.001	0.02	0.304	0.001	21.4703	21.4703	322.142	1	Z-006119	LOC100362967	gene		D:\assemblies\Rattus_norvegicus-Rnor_6.0-dbSNP149\Rattus_norvegicus-Rnor_6.0-dbSNP149.genometemplate\sequences\NC_005101_chr2.gbk#0	266435125	NC_005101.4	+	407	238839535..238839941	100362967, 2323726		LOC100362967
LOC103690217	0.001	0.001	0.029	0.001	1	1	31.1364	1	Z-006120	LOC103690217	gene		D:\assemblies\Rattus_norvegicus-Rnor_6.0-dbSNP149\Rattus_norvegicus-Rnor_6.0-dbSNP149.genometemplate\sequences\NC_005101_chr2.gbk#0	266435125	NC_005101.4	+	52821	239014777..239067597	103690217, 9186582		LOC103690217
Cxxc4	1.169	0.127	0.001	0.908	0.108642	0.139896	0.00104124	1.28768	Z-006122	Cxxc4	gene		D:\assemblies\Rattus_norvegicus-Rnor_6.0-dbSNP149\Rattus_norvegicus-Rnor_6.0-dbSNP149.genometemplate\sequences\NC_005101_chr2.gbk#0	266435125	NC_005101.4	+	24759	239414882..239439640	83824, 69228		Cxxc4	Idax
Slc9b1	0.005	0.001	0.225	0.001	0.178894	1	238.59	5.58989	Z-006128	Slc9b1	gene		D:\assemblies\Rattus_norvegicus-Rnor_6.0-dbSNP149\Rattus_norvegicus-Rnor_6.0-dbSNP149.genometemplate\sequences\NC_005101_chr2.gbk#0	266435125	NC_005101.4	+	54497	240527120..240581616	365946, 1305087		Slc9b1	Nhedc1, Nhedc2, RGD1305087
Bank1	0.708	0.617	6.259	0.59	0.870846	1.04429	10.6013	1.19916	Z-006137	Bank1	gene		D:\assemblies\Rattus_norvegicus-Rnor_6.0-dbSNP149\Rattus_norvegicus-Rnor_6.0-dbSNP149.genometemplate\sequences\NC_005101_chr2.gbk#0	266435125	NC_005101.4	-	271765	241545527..241273763	365948, 1564639		Bank1	LRRGT00104
Emcn	12.633	17.234	0.767	12.501	1.36416	1.37858	0.061389	1.01057	Z-006142	Emcn	gene		D:\assemblies\Rattus_norvegicus-Rnor_6.0-dbSNP149\Rattus_norvegicus-Rnor_6.0-dbSNP149.genometemplate\sequences\NC_005101_chr2.gbk#0	266435125	NC_005101.4	+	81171	242634319..242715489	295490, 1303218		Emcn
Adh6a	0.001	0.007	0.097	0.001	7.81879	7.81879	102.669	1	Z-006163	Adh6a	gene		D:\assemblies\Rattus_norvegicus-Rnor_6.0-dbSNP149\Rattus_norvegicus-Rnor_6.0-dbSNP149.genometemplate\sequences\NC_005101_chr2.gbk#0	266435125	NC_005101.4	+	22272	243577086..243599357	295498, 1310029		Adh6a
LOC310902	0.001	0.001	0.165	0.001	1	1	174.871	1	Z-006165	LOC310902	gene		D:\assemblies\Rattus_norvegicus-Rnor_6.0-dbSNP149\Rattus_norvegicus-Rnor_6.0-dbSNP149.genometemplate\sequences\NC_005101_chr2.gbk#0	266435125	NC_005101.4	+	19120	243615544..243634663	310902, 1595864		LOC310902
LOC102549290	0.005	0.01	0.001	0.185	1.97713	0.0567974	0.00511319	0.0287272	Z-006176	LOC102549290	gene		D:\assemblies\Rattus_norvegicus-Rnor_6.0-dbSNP149\Rattus_norvegicus-Rnor_6.0-dbSNP149.genometemplate\sequences\NC_005101_chr2.gbk#0	266435125	NC_005101.4	-	22334	244057788..244035455	102549290, 7539892		LOC102549290
Gbp3	0.03	0.005	0.056	0.001	0.165303	5.16061	59.0406	31.2191	Z-006192	Gbp3	gene		D:\assemblies\Rattus_norvegicus-Rnor_6.0-dbSNP149\Rattus_norvegicus-Rnor_6.0-dbSNP149.genometemplate\sequences\NC_005101_chr2.gbk#0	266435125	NC_005101.4	-	40351	248491258..248450908	685116, 1597766		Gbp3
Clca4	0.001	0.001	0.134	0.001	1	1	141.437	1	Z-006219	Clca4	gene		D:\assemblies\Rattus_norvegicus-Rnor_6.0-dbSNP149\Rattus_norvegicus-Rnor_6.0-dbSNP149.genometemplate\sequences\NC_005101_chr2.gbk#0	266435125	NC_005101.4	-	21122	250864060..250842939	362053, 1303234		Clca4	Clca6, Prp3
Wdr63	0.001	0.003	0.069	0.001	3.60194	3.60194	72.9577	1	Z-006239	Wdr63	gene		D:\assemblies\Rattus_norvegicus-Rnor_6.0-dbSNP149\Rattus_norvegicus-Rnor_6.0-dbSNP149.genometemplate\sequences\NC_005101_chr2.gbk#0	266435125	NC_005101.4	-	58268	251970699..251912432	292165, 1563105		Wdr63	RGD1563105
Mcoln3	0.001	0.005	0.152	0.001	5.76372	5.76372	161.144	1	Z-006240	Mcoln3	gene		D:\assemblies\Rattus_norvegicus-Rnor_6.0-dbSNP149\Rattus_norvegicus-Rnor_6.0-dbSNP149.genometemplate\sequences\NC_005101_chr2.gbk#0	266435125	NC_005101.4	+	77191	251930532..252007722	308022, 1308420		Mcoln3
Mcoln2	0.001	0.001	1.147	0.001	1	1	1213.81	1	Z-006241	Mcoln2	gene		D:\assemblies\Rattus_norvegicus-Rnor_6.0-dbSNP149\Rattus_norvegicus-Rnor_6.0-dbSNP149.genometemplate\sequences\NC_005101_chr2.gbk#0	266435125	NC_005101.4	+	49616	252018594..252068209	292168, 1308884		Mcoln2
Ssx2ip	3.076	8.665	0.633	5.078	2.81727	1.70649	0.124573	0.605725	Z-006243	Ssx2ip	gene		D:\assemblies\Rattus_norvegicus-Rnor_6.0-dbSNP149\Rattus_norvegicus-Rnor_6.0-dbSNP149.genometemplate\sequences\NC_005101_chr2.gbk#0	266435125	NC_005101.4	+	32727	252263323..252296049	308023, 708490		Ssx2ip	ADIP
LOC56764	1.3	0.06	0.001	0.286	0.0464748	0.211184	0.00330355	4.54406	Z-006251	LOC56764	gene		D:\assemblies\Rattus_norvegicus-Rnor_6.0-dbSNP149\Rattus_norvegicus-Rnor_6.0-dbSNP149.genometemplate\sequences\NC_005101_chr2.gbk#0	266435125	NC_005101.4	-	37348	252537490..252500143	56764, 708544		LOC56764	Djl, rDJL
Ttll7	0.039	0.078	2.505	0.539	2.02052	0.145401	4.64592	0.071962	Z-006254	Ttll7	gene		D:\assemblies\Rattus_norvegicus-Rnor_6.0-dbSNP149\Rattus_norvegicus-Rnor_6.0-dbSNP149.genometemplate\sequences\NC_005101_chr2.gbk#0	266435125	NC_005101.4	+	75006	252779741..252854746	310982, 1566117		Ttll7
LOC102550419	0.005	0.005	0.001	0.147	1.10042	0.0368341	0.00643121	0.0334729	Z-006265	LOC102550419	gene		D:\assemblies\Rattus_norvegicus-Rnor_6.0-dbSNP149\Rattus_norvegicus-Rnor_6.0-dbSNP149.genometemplate\sequences\NC_005101_chr2.gbk#0	266435125	NC_005101.4	+	829	254596674..254597502	102550419, 7614361		LOC102550419
LOC102547779	0.005	0.005	0.001	0.147	1.10042	0.0368341	0.00643121	0.0334729	Z-006266	LOC102547779	gene		D:\assemblies\Rattus_norvegicus-Rnor_6.0-dbSNP149\Rattus_norvegicus-Rnor_6.0-dbSNP149.genometemplate\sequences\NC_005101_chr2.gbk#0	266435125	NC_005101.4	+	829	254607997..254608825	102547779, 7563133		LOC102547779
LOC108350145	0.456	1.875	0.001	1.116	4.11357	1.68041	0.000847253	0.408505	Z-006294	LOC108350145	gene		D:\assemblies\Rattus_norvegicus-Rnor_6.0-dbSNP149\Rattus_norvegicus-Rnor_6.0-dbSNP149.genometemplate\sequences\NC_005101_chr2.gbk#0	266435125	NC_005101.4	-	7193	258235806..258228614	108350145		LOC108350145
LOC102553411	0.044	0.048	0.001	0.442	1.09945	0.109545	0.00214016	0.0996365	Z-006301	LOC102553411	gene		D:\assemblies\Rattus_norvegicus-Rnor_6.0-dbSNP149\Rattus_norvegicus-Rnor_6.0-dbSNP149.genometemplate\sequences\NC_005101_chr2.gbk#0	266435125	NC_005101.4	-	7544	260004741..259997198	102553411, 7701132		LOC102553411
LOC102553583	0.001	0.084	0.045	0.001	88.4164	88.4164	47.9986	1	Z-006308	LOC102553583	gene		D:\assemblies\Rattus_norvegicus-Rnor_6.0-dbSNP149\Rattus_norvegicus-Rnor_6.0-dbSNP149.genometemplate\sequences\NC_005101_chr2.gbk#0	266435125	NC_005101.4	-	21031	260337407..260316377	102553583, 7692119		LOC102553583
Lhx8	0.001	0.006	1.174	0.001	6.16369	6.16369	1241.76	1	Z-006309	Lhx8	gene		D:\assemblies\Rattus_norvegicus-Rnor_6.0-dbSNP149\Rattus_norvegicus-Rnor_6.0-dbSNP149.genometemplate\sequences\NC_005101_chr2.gbk#0	266435125	NC_005101.4	-	26540	260598744..260572205	365963, 1308749		Lhx8	Lhx7
Il1rn	10.977	26.475	0.451	8.959	2.41188	2.95516	0.0503103	1.22525	Z-006364	Il1rn	gene		D:\assemblies\Rattus_norvegicus-Rnor_6.0-dbSNP149\Rattus_norvegicus-Rnor_6.0-dbSNP149.genometemplate\sequences\NC_005102_chr3.gbk#0	177699992	NC_005102.4	+	18847	1449778..1468624	60582, 621159		Il1rn	IL-1ra
LOC103691745	1.409	2.045	7.883	1.312	1.45182	1.5582	6.00627	1.07328	Z-006370	LOC103691745	gene		D:\assemblies\Rattus_norvegicus-Rnor_6.0-dbSNP149\Rattus_norvegicus-Rnor_6.0-dbSNP149.genometemplate\sequences\NC_005102_chr3.gbk#0	177699992	NC_005102.4	-	4103	1965135..1961033	103691745, 9314471		LOC103691745
Dph7	1.689	3.532	18.553	1.445	2.09045	2.44436	12.8404	1.1693	Z-006374	Dph7	gene		D:\assemblies\Rattus_norvegicus-Rnor_6.0-dbSNP149\Rattus_norvegicus-Rnor_6.0-dbSNP149.genometemplate\sequences\NC_005102_chr3.gbk#0	177699992	NC_005102.4	+	8909	2170193..2179101	296550, 1304868		Dph7
Pnpla7	1.487	1.37	15.518	1.153	0.921392	1.18832	13.4551	1.2897	Z-006376	Pnpla7	gene		D:\assemblies\Rattus_norvegicus-Rnor_6.0-dbSNP149\Rattus_norvegicus-Rnor_6.0-dbSNP149.genometemplate\sequences\NC_005102_chr3.gbk#0	177699992	NC_005102.4	+	79700	2182191..2261890	246246, 708466		Pnpla7	Nte-related, Ntel, Ntel1
Noxa1	0.001	0.001	1.646	0.001	1	1	1741.37	1	Z-006379	Noxa1	gene		D:\assemblies\Rattus_norvegicus-Rnor_6.0-dbSNP149\Rattus_norvegicus-Rnor_6.0-dbSNP149.genometemplate\sequences\NC_005102_chr3.gbk#0	177699992	NC_005102.4	-	9816	2309491..2299676	311793, 1306687		Noxa1
LOC108350588	0.007	0.111	1.809	0.001	15.3579	117.884	1914.11	7.67575	Z-006382	LOC108350588	gene		D:\assemblies\Rattus_norvegicus-Rnor_6.0-dbSNP149\Rattus_norvegicus-Rnor_6.0-dbSNP149.genometemplate\sequences\NC_005102_chr3.gbk#0	177699992	NC_005102.4	+	1107	2404852..2405958	108350588		LOC108350588
Cysrt1	0.001	0.001	0.535	0.001	1	1	565.63	1	Z-006390	Cysrt1	gene		D:\assemblies\Rattus_norvegicus-Rnor_6.0-dbSNP149\Rattus_norvegicus-Rnor_6.0-dbSNP149.genometemplate\sequences\NC_005102_chr3.gbk#0	177699992	NC_005102.4	-	3743	2462037..2458295	499747, 1560880		Cysrt1	RGD1560880
LOC103691747	0.001	0.001	0.787	0.001	1	1	832.953	1	Z-006401	LOC103691747	gene		D:\assemblies\Rattus_norvegicus-Rnor_6.0-dbSNP149\Rattus_norvegicus-Rnor_6.0-dbSNP149.genometemplate\sequences\NC_005102_chr3.gbk#0	177699992	NC_005102.4	+	1569	2559500..2561068	103691747, 9354780		LOC103691747
Dpp7	10.493	14.518	51.354	9.806	1.38354	1.48047	5.23705	1.07006	Z-006402	Dpp7	gene		D:\assemblies\Rattus_norvegicus-Rnor_6.0-dbSNP149\Rattus_norvegicus-Rnor_6.0-dbSNP149.genometemplate\sequences\NC_005102_chr3.gbk#0	177699992	NC_005102.4	-	4253	2573387..2569135	83799, 71073		Dpp7	Dpp2
Entpd2	0.62	0.74	5.247	0.543	1.19269	1.36311	9.66989	1.14289	Z-006406	Entpd2	gene		D:\assemblies\Rattus_norvegicus-Rnor_6.0-dbSNP149\Rattus_norvegicus-Rnor_6.0-dbSNP149.genometemplate\sequences\NC_005102_chr3.gbk#0	177699992	NC_005102.4	+	6024	2617795..2623818	64467, 69266		Entpd2	Cd39l1, NTPDase2
Lcn12	0.001	0.001	1.831	0.001	1	1	1937.29	1	Z-006414	Lcn12	gene		D:\assemblies\Rattus_norvegicus-Rnor_6.0-dbSNP149\Rattus_norvegicus-Rnor_6.0-dbSNP149.genometemplate\sequences\NC_005102_chr3.gbk#0	177699992	NC_005102.4	-	2589	2719135..2716547	680602, 1589474		Lcn12
Ubac1	34.679	70.943	3.67	43.845	2.04571	1.61804	0.0837036	0.790942	Z-006451	Ubac1	gene		D:\assemblies\Rattus_norvegicus-Rnor_6.0-dbSNP149\Rattus_norvegicus-Rnor_6.0-dbSNP149.genometemplate\sequences\NC_005102_chr3.gbk#0	177699992	NC_005102.4	-	22847	3476242..3453396	362087, 1359542		Ubac1	Ubadc1
RGD1564379	3.802	0.385	0.956	5.321	0.101128	0.0722645	0.17968	0.714583	Z-006454	RGD1564379	gene		D:\assemblies\Rattus_norvegicus-Rnor_6.0-dbSNP149\Rattus_norvegicus-Rnor_6.0-dbSNP149.genometemplate\sequences\NC_005102_chr3.gbk#0	177699992	NC_005102.4	-	3693	3594475..3590783	499758, 1564379		RGD1564379
LOC100912008	3.865	5.243	31.224	4.498	1.3565	1.16577	6.94194	0.859397	Z-006489	LOC100912008	gene		D:\assemblies\Rattus_norvegicus-Rnor_6.0-dbSNP149\Rattus_norvegicus-Rnor_6.0-dbSNP149.genometemplate\sequences\NC_005102_chr3.gbk#0	177699992	NC_005102.4	-	2844	4872633..4869790	100912008, 6489329		LOC100912008
LOC100912042	2.393	3.675	18.239	3.901	1.53586	0.941912	4.67488	0.613279	Z-006490	LOC100912042	gene		D:\assemblies\Rattus_norvegicus-Rnor_6.0-dbSNP149\Rattus_norvegicus-Rnor_6.0-dbSNP149.genometemplate\sequences\NC_005102_chr3.gbk#0	177699992	NC_005102.4	+	3843	4872657..4876499	100912042, 6489529		LOC100912042
Surf1	3.865	5.243	31.224	4.498	1.3565	1.16577	6.94194	0.859397	Z-006502	Surf1	gene		D:\assemblies\Rattus_norvegicus-Rnor_6.0-dbSNP149\Rattus_norvegicus-Rnor_6.0-dbSNP149.genometemplate\sequences\NC_005102_chr3.gbk#0	177699992	NC_005102.4	-	2844	5464560..5461717	64463, 620527		Surf1	Ab1-205
Surf2	2.393	3.675	18.239	3.901	1.53586	0.941912	4.67488	0.613279	Z-006503	Surf2	gene		D:\assemblies\Rattus_norvegicus-Rnor_6.0-dbSNP149\Rattus_norvegicus-Rnor_6.0-dbSNP149.genometemplate\sequences\NC_005102_chr3.gbk#0	177699992	NC_005102.4	+	3834	5464593..5468426	619345, 1565817		Surf2
Dbh	0.04	2.257	0.081	0.358	56.8569	6.30685	0.226719	0.110925	Z-006514	Dbh	gene		D:\assemblies\Rattus_norvegicus-Rnor_6.0-dbSNP149\Rattus_norvegicus-Rnor_6.0-dbSNP149.genometemplate\sequences\NC_005102_chr3.gbk#0	177699992	NC_005102.4	+	22660	5709236..5731895	25699, 2489		Dbh	DOPBHY
Fcnb	16.448	33.461	1.518	15.085	2.03434	2.21813	0.100644	1.09035	Z-006526	Fcnb	gene		D:\assemblies\Rattus_norvegicus-Rnor_6.0-dbSNP149\Rattus_norvegicus-Rnor_6.0-dbSNP149.genometemplate\sequences\NC_005102_chr3.gbk#0	177699992	NC_005102.4	-	8378	6626193..6617816	114091, 621222		Fcnb	Fcn2
Gtf3c4	0.29	1.187	0.207	0.962	4.09516	1.23448	0.215079	0.301449	Z-006543	Gtf3c4	gene		D:\assemblies\Rattus_norvegicus-Rnor_6.0-dbSNP149\Rattus_norvegicus-Rnor_6.0-dbSNP149.genometemplate\sequences\NC_005102_chr3.gbk#0	177699992	NC_005102.4	-	17923	7422779..7404857	685539, 1592609		Gtf3c4
Crat	6.123	7.692	1.22	7.657	1.25633	1.0046	0.15935	0.799632	Z-006582	Crat	gene		D:\assemblies\Rattus_norvegicus-Rnor_6.0-dbSNP149\Rattus_norvegicus-Rnor_6.0-dbSNP149.genometemplate\sequences\NC_005102_chr3.gbk#0	177699992	NC_005102.4	-	13976	8981959..8967984	311849, 1303031		Crat
Ptpa	33.744	63.715	5.594	42.036	1.88819	1.51573	0.133079	0.802743	Z-006583	Ptpa	gene		D:\assemblies\Rattus_norvegicus-Rnor_6.0-dbSNP149\Rattus_norvegicus-Rnor_6.0-dbSNP149.genometemplate\sequences\NC_005102_chr3.gbk#0	177699992	NC_005102.4	+	30464	8982122..9012585	362102, 1308354		Ptpa	Ppp2r4
Ptges	0.001	0.001	0.454	0.001	1	1	480.759	1	Z-006601	Ptges	gene		D:\assemblies\Rattus_norvegicus-Rnor_6.0-dbSNP149\Rattus_norvegicus-Rnor_6.0-dbSNP149.genometemplate\sequences\NC_005102_chr3.gbk#0	177699992	NC_005102.4	-	11345	9738752..9727408	59103, 62076		Ptges	Pges
Tor1a	0.172	2.886	10.243	2.315	16.7305	1.24665	4.42445	0.0745135	Z-006603	Tor1a	gene		D:\assemblies\Rattus_norvegicus-Rnor_6.0-dbSNP149\Rattus_norvegicus-Rnor_6.0-dbSNP149.genometemplate\sequences\NC_005102_chr3.gbk#0	177699992	NC_005102.4	-	6997	9807318..9800322	266606, 628863		Tor1a	Dyt1
Abl1	4.335	2.789	0.782	5.2	0.643352	0.536342	0.150448	0.833668	Z-006610	Abl1	gene		D:\assemblies\Rattus_norvegicus-Rnor_6.0-dbSNP149\Rattus_norvegicus-Rnor_6.0-dbSNP149.genometemplate\sequences\NC_005102_chr3.gbk#0	177699992	NC_005102.4	-	103257	10145076..10041820	311860, 1584969		Abl1	Abl
Ass1	3.748	14.17	0.294	4.476	3.78041	3.16583	0.0657909	0.837429	Z-006615	Ass1	gene		D:\assemblies\Rattus_norvegicus-Rnor_6.0-dbSNP149\Rattus_norvegicus-Rnor_6.0-dbSNP149.genometemplate\sequences\NC_005102_chr3.gbk#0	177699992	NC_005102.4	-	48437	10375847..10327411	25698, 2163		Ass1	Ass, ASSA
LOC102555629	0.001	0.04	0.18	0.001	41.8266	41.8266	190.378	1	Z-006623	LOC102555629	gene		D:\assemblies\Rattus_norvegicus-Rnor_6.0-dbSNP149\Rattus_norvegicus-Rnor_6.0-dbSNP149.genometemplate\sequences\NC_005102_chr3.gbk#0	177699992	NC_005102.4	-	6543	11082555..11076013	102555629, 7511011		LOC102555629
Lcn2	39.286	80.947	0.564	36.768	2.06048	2.2016	0.0153378	1.06849	Z-006636	Lcn2	gene		D:\assemblies\Rattus_norvegicus-Rnor_6.0-dbSNP149\Rattus_norvegicus-Rnor_6.0-dbSNP149.genometemplate\sequences\NC_005102_chr3.gbk#0	177699992	NC_005102.4	-	3346	11417534..11414189	170496, 69408		Lcn2	Sip24
Ak1	3.035	2.564	0.221	3.524	0.844776	0.727698	0.0627122	0.861409	Z-006646	Ak1	gene		D:\assemblies\Rattus_norvegicus-Rnor_6.0-dbSNP149\Rattus_norvegicus-Rnor_6.0-dbSNP149.genometemplate\sequences\NC_005102_chr3.gbk#0	177699992	NC_005102.4	+	6993	11652143..11659135	24183, 2076		Ak1	Ak 1
Fam129b	15.683	25.412	0.69	20.467	1.62043	1.24161	0.0337223	0.766222	Z-006657	Fam129b	gene		D:\assemblies\Rattus_norvegicus-Rnor_6.0-dbSNP149\Rattus_norvegicus-Rnor_6.0-dbSNP149.genometemplate\sequences\NC_005102_chr3.gbk#0	177699992	NC_005102.4	+	49613	11921715..11971327	362115, 1307018		Fam129b	RGD1307018
Dab2ip	1.803	0.152	0.292	1.829	0.0844447	0.0832594	0.159638	0.985963	Z-006705	Dab2ip	gene		D:\assemblies\Rattus_norvegicus-Rnor_6.0-dbSNP149\Rattus_norvegicus-Rnor_6.0-dbSNP149.genometemplate\sequences\NC_005102_chr3.gbk#0	177699992	NC_005102.4	+	171024	14889263..15060286	192126, 621686		Dab2ip	DIP1/2
Lhx6	0.07	0.009	0.001	0.3	0.12659	0.0293548	0.00315005	0.231889	Z-006712	Lhx6	gene		D:\assemblies\Rattus_norvegicus-Rnor_6.0-dbSNP149\Rattus_norvegicus-Rnor_6.0-dbSNP149.genometemplate\sequences\NC_005102_chr3.gbk#0	177699992	NC_005102.4	-	24156	15433504..15409349	311901, 1306174		Lhx6
Ptgs1	5.032	11.281	0.276	7.121	2.24179	1.58412	0.0387209	0.70663	Z-006716	Ptgs1	gene		D:\assemblies\Rattus_norvegicus-Rnor_6.0-dbSNP149\Rattus_norvegicus-Rnor_6.0-dbSNP149.genometemplate\sequences\NC_005102_chr3.gbk#0	177699992	NC_005102.4	+	21655	15560685..15582339	24693, 3439		Ptgs1	Cox-1, Cox-3, Cox1, Cox3, Pghs-1
LOC502842	0.001	0.001	1.574	0.001	1	1	1665	1	Z-006733	LOC502842	gene		D:\assemblies\Rattus_norvegicus-Rnor_6.0-dbSNP149\Rattus_norvegicus-Rnor_6.0-dbSNP149.genometemplate\sequences\NC_005102_chr3.gbk#0	177699992	NC_005102.4	-	661	16441055..16440395	502842		LOC502842
LOC100361052	0.007	0.012	0.601	0.001	1.6206	12.4049	635.972	7.6545	Z-006736	LOC100361052	gene		D:\assemblies\Rattus_norvegicus-Rnor_6.0-dbSNP149\Rattus_norvegicus-Rnor_6.0-dbSNP149.genometemplate\sequences\NC_005102_chr3.gbk#0	177699992	NC_005102.4	+	772	16495641..16496412	100361052, 2320908		LOC100361052
LOC100360848	0.001	0.001	3.168	0.001	1	1	3351.52	1	Z-006738	LOC100360848	gene		D:\assemblies\Rattus_norvegicus-Rnor_6.0-dbSNP149\Rattus_norvegicus-Rnor_6.0-dbSNP149.genometemplate\sequences\NC_005102_chr3.gbk#0	177699992	NC_005102.4	+	620	16571590..16572209	100360848, 2321310		LOC100360848
LOC690917	0.095	0.008	1.648	0.001	0.089225	8.9874	1743.22	100.727	Z-006739	LOC690917	gene		D:\assemblies\Rattus_norvegicus-Rnor_6.0-dbSNP149\Rattus_norvegicus-Rnor_6.0-dbSNP149.genometemplate\sequences\NC_005102_chr3.gbk#0	177699992	NC_005102.4	+	774	16590139..16590912	690917		LOC690917
LOC690884	0.782	0.001	7.399	0.531	0.00120851	0.00178062	13.9389	1.47341	Z-006744	LOC690884	gene		D:\assemblies\Rattus_norvegicus-Rnor_6.0-dbSNP149\Rattus_norvegicus-Rnor_6.0-dbSNP149.genometemplate\sequences\NC_005102_chr3.gbk#0	177699992	NC_005102.4	+	883	16816984..16817866	690884		LOC690884
LOC102554660	0.292	0.009	1.157	0.001	0.0312547	9.6492	1223.88	308.728	Z-006770	LOC102554660	gene		D:\assemblies\Rattus_norvegicus-Rnor_6.0-dbSNP149\Rattus_norvegicus-Rnor_6.0-dbSNP149.genometemplate\sequences\NC_005102_chr3.gbk#0	177699992	NC_005102.4	+	728	18060465..18061192	102554660		LOC102554660
RGD1565546	0.008	0.017	1.83	0.001	2.17612	17.5162	1936.65	8.04931	Z-006774	RGD1565546	gene		D:\assemblies\Rattus_norvegicus-Rnor_6.0-dbSNP149\Rattus_norvegicus-Rnor_6.0-dbSNP149.genometemplate\sequences\NC_005102_chr3.gbk#0	177699992	NC_005102.4	+	544	18315103..18315646	500182, 1565546		RGD1565546
LOC102555397	0.292	0.009	1.157	0.001	0.0312547	9.6492	1223.88	308.728	Z-006776	LOC102555397	gene		D:\assemblies\Rattus_norvegicus-Rnor_6.0-dbSNP149\Rattus_norvegicus-Rnor_6.0-dbSNP149.genometemplate\sequences\NC_005102_chr3.gbk#0	177699992	NC_005102.4	+	728	18501895..18502622	102555397		LOC102555397
LOC690527	0.006	0.073	2.175	0.001	11.8919	76.8089	2301.3	6.45896	Z-006784	LOC690527	gene		D:\assemblies\Rattus_norvegicus-Rnor_6.0-dbSNP149\Rattus_norvegicus-Rnor_6.0-dbSNP149.genometemplate\sequences\NC_005102_chr3.gbk#0	177699992	NC_005102.4	+	730	18787170..18787899	690527		LOC690527
RGD1563500	0.001	0.001	0.206	0.001	1	1	217.641	1	Z-006793	RGD1563500	gene		D:\assemblies\Rattus_norvegicus-Rnor_6.0-dbSNP149\Rattus_norvegicus-Rnor_6.0-dbSNP149.genometemplate\sequences\NC_005102_chr3.gbk#0	177699992	NC_005102.4	+	566	19189945..19190510	502810, 1563500		RGD1563500
LOC690275	0.008	0.001	7.005	0.001	0.125882	1	7411.27	7.94394	Z-006818	LOC690275	gene		D:\assemblies\Rattus_norvegicus-Rnor_6.0-dbSNP149\Rattus_norvegicus-Rnor_6.0-dbSNP149.genometemplate\sequences\NC_005102_chr3.gbk#0	177699992	NC_005102.4	-	559	20480231..20479673	690275		LOC690275
LOC102552133	0.006	0.131	1.42	0.001	23.0701	138.328	1502.55	5.99596	Z-006821	LOC102552133	gene		D:\assemblies\Rattus_norvegicus-Rnor_6.0-dbSNP149\Rattus_norvegicus-Rnor_6.0-dbSNP149.genometemplate\sequences\NC_005102_chr3.gbk#0	177699992	NC_005102.4	+	904	20561832..20562735	102552133		LOC102552133
LOC690156	3.446	6.37	17.96	1.893	1.84867	3.36561	9.489	1.82055	Z-006824	LOC690156	gene		D:\assemblies\Rattus_norvegicus-Rnor_6.0-dbSNP149\Rattus_norvegicus-Rnor_6.0-dbSNP149.genometemplate\sequences\NC_005102_chr3.gbk#0	177699992	NC_005102.4	+	606	20660926..20661531	690156		LOC690156
Pdcl	4.105	0.409	1.27	5.169	0.099683	0.079159	0.245729	0.794108	Z-006851	Pdcl	gene		D:\assemblies\Rattus_norvegicus-Rnor_6.0-dbSNP149\Rattus_norvegicus-Rnor_6.0-dbSNP149.genometemplate\sequences\NC_005102_chr3.gbk#0	177699992	NC_005102.4	-	7473	21609821..21602349	64013, 621135		Pdcl	Phlp
LOC100362149	110.331	302.271	885.462	145.598	2.73968	2.07607	6.08154	0.757776	Z-006865	LOC100362149	gene		D:\assemblies\Rattus_norvegicus-Rnor_6.0-dbSNP149\Rattus_norvegicus-Rnor_6.0-dbSNP149.genometemplate\sequences\NC_005102_chr3.gbk#0	177699992	NC_005102.4	+	513	22964222..22964734	100362149, 2318734		LOC100362149
Rpl35	625.281	1419.68	13629.4	767.307	2.27046	1.85021	17.7627	0.814903	Z-006875	Rpl35	gene		D:\assemblies\Rattus_norvegicus-Rnor_6.0-dbSNP149\Rattus_norvegicus-Rnor_6.0-dbSNP149.genometemplate\sequences\NC_005102_chr3.gbk#0	177699992	NC_005102.4	-	2962	23297774..23294813	296709, 1303007		Rpl35
Kynu	0.062	0.008	2.279	0.263	0.135749	0.0321521	8.65415	0.236849	Z-006887	Kynu	gene		D:\assemblies\Rattus_norvegicus-Rnor_6.0-dbSNP149\Rattus_norvegicus-Rnor_6.0-dbSNP149.genometemplate\sequences\NC_005102_chr3.gbk#0	177699992	NC_005102.4	+	150014	28416926..28566939	116682, 71061		Kynu
Arhgap15	5.034	8.747	33.558	6.419	1.73742	1.36271	5.22809	0.784332	Z-006889	Arhgap15	gene		D:\assemblies\Rattus_norvegicus-Rnor_6.0-dbSNP149\Rattus_norvegicus-Rnor_6.0-dbSNP149.genometemplate\sequences\NC_005102_chr3.gbk#0	177699992	NC_005102.4	+	609239	28626987..29236225	295635, 1359304		Arhgap15
Zeb2	10.288	11.483	1.632	10.624	1.11613	1.08083	0.153603	0.968373	Z-006893	Zeb2	gene		D:\assemblies\Rattus_norvegicus-Rnor_6.0-dbSNP149\Rattus_norvegicus-Rnor_6.0-dbSNP149.genometemplate\sequences\NC_005102_chr3.gbk#0	177699992	NC_005102.4	-	128644	29985932..29857289	311071, 1307272		Zeb2	Zfhx1b
Rnd3	3.333	0.249	0.18	4.657	0.0746798	0.0534412	0.038632	0.715605	Z-006926	Rnd3	gene		D:\assemblies\Rattus_norvegicus-Rnor_6.0-dbSNP149\Rattus_norvegicus-Rnor_6.0-dbSNP149.genometemplate\sequences\NC_005102_chr3.gbk#0	177699992	NC_005102.4	-	17354	36660727..36643374	295588, 1359690		Rnd3	Arhe, RHOE
LOC108350373	0.001	0.001	0.266	0.001	1	1	281.613	1	Z-006940	LOC108350373	gene		D:\assemblies\Rattus_norvegicus-Rnor_6.0-dbSNP149\Rattus_norvegicus-Rnor_6.0-dbSNP149.genometemplate\sequences\NC_005102_chr3.gbk#0	177699992	NC_005102.4	-	14792	39372197..39357406	108350373		LOC108350373
Rprm	0.001	0.009	0.364	0.001	9.21847	9.21847	385.233	1	Z-006941	Rprm	gene		D:\assemblies\Rattus_norvegicus-Rnor_6.0-dbSNP149\Rattus_norvegicus-Rnor_6.0-dbSNP149.genometemplate\sequences\NC_005102_chr3.gbk#0	177699992	NC_005102.4	-	1418	39596718..39595301	680110, 1595512		Rprm
Cytip	6.679	9.031	62.9	7.449	1.35215	1.21246	8.4446	0.896691	Z-006967	Cytip	gene		D:\assemblies\Rattus_norvegicus-Rnor_6.0-dbSNP149\Rattus_norvegicus-Rnor_6.0-dbSNP149.genometemplate\sequences\NC_005102_chr3.gbk#0	177699992	NC_005102.4	-	75230	44225723..44150494	311047, 1307990		Cytip	Pscdbp
LOC102555754	0.005	0.001	0.311	0.001	0.184863	1	329.036	5.40943	Z-006968	LOC102555754	gene		D:\assemblies\Rattus_norvegicus-Rnor_6.0-dbSNP149\Rattus_norvegicus-Rnor_6.0-dbSNP149.genometemplate\sequences\NC_005102_chr3.gbk#0	177699992	NC_005102.4	+	1474	44193256..44194729	102555754, 7739841		LOC102555754
Acvr1	1.158	2.371	0.177	1.844	2.04786	1.28555	0.0960051	0.627751	Z-006971	Acvr1	gene		D:\assemblies\Rattus_norvegicus-Rnor_6.0-dbSNP149\Rattus_norvegicus-Rnor_6.0-dbSNP149.genometemplate\sequences\NC_005102_chr3.gbk#0	177699992	NC_005102.4	-	107205	44539680..44432476	79558, 620200		Acvr1
LOC102556145	0.116	0.125	0.001	0.795	1.07872	0.157113	0.00118832	0.145647	Z-006974	LOC102556145	gene		D:\assemblies\Rattus_norvegicus-Rnor_6.0-dbSNP149\Rattus_norvegicus-Rnor_6.0-dbSNP149.genometemplate\sequences\NC_005102_chr3.gbk#0	177699992	NC_005102.4	+	4148	44788083..44792230	102556145, 7671946		LOC102556145
LOC108350378	0.005	0.085	0.045	0.001	16.859	89.7198	47.6695	5.32177	Z-006980	LOC108350378	gene		D:\assemblies\Rattus_norvegicus-Rnor_6.0-dbSNP149\Rattus_norvegicus-Rnor_6.0-dbSNP149.genometemplate\sequences\NC_005102_chr3.gbk#0	177699992	NC_005102.4	-	27992	45554205..45526214	108350378		LOC108350378
Tanc1	1.617	1.397	0.295	1.627	0.863806	0.858653	0.181236	0.994035	Z-006983	Tanc1	gene		D:\assemblies\Rattus_norvegicus-Rnor_6.0-dbSNP149\Rattus_norvegicus-Rnor_6.0-dbSNP149.genometemplate\sequences\NC_005102_chr3.gbk#0	177699992	NC_005102.4	+	233915	45683773..45917687	311055, 1302949		Tanc1	Tanc
Ly75	0.027	0.024	1.142	0.172	0.886788	0.137123	6.65502	0.154629	Z-006991	Ly75	gene		D:\assemblies\Rattus_norvegicus-Rnor_6.0-dbSNP149\Rattus_norvegicus-Rnor_6.0-dbSNP149.genometemplate\sequences\NC_005102_chr3.gbk#0	177699992	NC_005102.4	-	87434	46457182..46369749	499800, 1565962		Ly75
Grb14	6.736	12.713	0.172	9.22	1.88715	1.37877	0.0186578	0.73061	Z-007018	Grb14	gene		D:\assemblies\Rattus_norvegicus-Rnor_6.0-dbSNP149\Rattus_norvegicus-Rnor_6.0-dbSNP149.genometemplate\sequences\NC_005102_chr3.gbk#0	177699992	NC_005102.4	-	117045	51054447..50937403	58844, 61869		Grb14
Klhl41	0.033	0.008	0.001	0.14	0.250501	0.05994	0.00675524	0.239281	Z-007052	Klhl41	gene		D:\assemblies\Rattus_norvegicus-Rnor_6.0-dbSNP149\Rattus_norvegicus-Rnor_6.0-dbSNP149.genometemplate\sequences\NC_005102_chr3.gbk#0	177699992	NC_005102.4	+	13127	55910177..55923303	117537, 620852		Klhl41	Kbtbd10, Krp1, Sarcosin
Fastkd1	0.376	0.111	30.176	1.042	0.295799	0.106607	28.951	0.360404	Z-007053	Fastkd1	gene		D:\assemblies\Rattus_norvegicus-Rnor_6.0-dbSNP149\Rattus_norvegicus-Rnor_6.0-dbSNP149.genometemplate\sequences\NC_005102_chr3.gbk#0	177699992	NC_005102.4	-	25987	55951584..55925598	311112, 1563531		Fastkd1	RGD1563531
Ssb	22.296	43.355	130.52	30.676	1.94454	1.41332	4.25478	0.726816	Z-007058	Ssb	gene		D:\assemblies\Rattus_norvegicus-Rnor_6.0-dbSNP149\Rattus_norvegicus-Rnor_6.0-dbSNP149.genometemplate\sequences\NC_005102_chr3.gbk#0	177699992	NC_005102.4	+	9584	56092425..56102008	81783, 620804		Ssb
LOC102549214	0.839	1.664	0.063	1.138	1.98213	1.46168	0.0551694	0.737428	Z-007085	LOC102549214	gene		D:\assemblies\Rattus_norvegicus-Rnor_6.0-dbSNP149\Rattus_norvegicus-Rnor_6.0-dbSNP149.genometemplate\sequences\NC_005102_chr3.gbk#0	177699992	NC_005102.4	+	14293	58253103..58267395	102549214, 7584653		LOC102549214
LOC103691816	1.448	12.715	0.001	1.88	8.7807	6.76323	0.000502714	0.770237	Z-007087	LOC103691816	gene		D:\assemblies\Rattus_norvegicus-Rnor_6.0-dbSNP149\Rattus_norvegicus-Rnor_6.0-dbSNP149.genometemplate\sequences\NC_005102_chr3.gbk#0	177699992	NC_005102.4	-	4835	58306076..58301242	103691816, 9400923		LOC103691816
LOC108350398	1.178	4.502	21.659	2.349	3.82063	1.91673	9.22202	0.50168	Z-007112	LOC108350398	gene		D:\assemblies\Rattus_norvegicus-Rnor_6.0-dbSNP149\Rattus_norvegicus-Rnor_6.0-dbSNP149.genometemplate\sequences\NC_005102_chr3.gbk#0	177699992	NC_005102.4	+	2403	60437485..60439887	108350398		LOC108350398
LOC102554395	0.001	0.001	0.17	0.001	1	1	180.19	1	Z-007139	LOC102554395	gene		D:\assemblies\Rattus_norvegicus-Rnor_6.0-dbSNP149\Rattus_norvegicus-Rnor_6.0-dbSNP149.genometemplate\sequences\NC_005102_chr3.gbk#0	177699992	NC_005102.4	+	2538	62300743..62303280	102554395, 7733574		LOC102554395
Dfnb59	0.005	0.008	0.162	0.001	1.50883	8.66029	171.822	5.73972	Z-007154	Dfnb59	gene		D:\assemblies\Rattus_norvegicus-Rnor_6.0-dbSNP149\Rattus_norvegicus-Rnor_6.0-dbSNP149.genometemplate\sequences\NC_005102_chr3.gbk#0	177699992	NC_005102.4	+	9778	63508386..63518163	679552, 1587131		Dfnb59
Fkbp7	3.31	0.269	15.185	1.9	0.0813548	0.141697	7.99018	1.74172	Z-007155	Fkbp7	gene		D:\assemblies\Rattus_norvegicus-Rnor_6.0-dbSNP149\Rattus_norvegicus-Rnor_6.0-dbSNP149.genometemplate\sequences\NC_005102_chr3.gbk#0	177699992	NC_005102.4	-	13356	63535835..63522480	295672, 1305293		Fkbp7
Cwc22	1.939	3.473	21.593	4.003	1.79152	0.867581	5.3943	0.484271	Z-007165	Cwc22	gene		D:\assemblies\Rattus_norvegicus-Rnor_6.0-dbSNP149\Rattus_norvegicus-Rnor_6.0-dbSNP149.genometemplate\sequences\NC_005102_chr3.gbk#0	177699992	NC_005102.4	-	48983	64780127..64731145	362153, 1565385		Cwc22
LOC102552587	0.003	0.003	0.422	0.002	1.20076	1.39867	194.276	1.16482	Z-007170	LOC102552587	gene		D:\assemblies\Rattus_norvegicus-Rnor_6.0-dbSNP149\Rattus_norvegicus-Rnor_6.0-dbSNP149.genometemplate\sequences\NC_005102_chr3.gbk#0	177699992	NC_005102.4	+	96031	65921317..66017347	102552587, 7724987		LOC102552587
Neurod1	0.001	0.001	0.123	0.001	1	1	130.28	1	Z-007176	Neurod1	gene		D:\assemblies\Rattus_norvegicus-Rnor_6.0-dbSNP149\Rattus_norvegicus-Rnor_6.0-dbSNP149.genometemplate\sequences\NC_005102_chr3.gbk#0	177699992	NC_005102.4	-	3304	66417617..66414314	29458, 3165		Neurod1
Nckap1	8.865	20.932	1.309	12.232	2.36121	1.71134	0.107031	0.724774	Z-007189	Nckap1	gene		D:\assemblies\Rattus_norvegicus-Rnor_6.0-dbSNP149\Rattus_norvegicus-Rnor_6.0-dbSNP149.genometemplate\sequences\NC_005102_chr3.gbk#0	177699992	NC_005102.4	-	79501	67804680..67725180	58823, 61939		Nckap1
LOC108350558	0.001	0.004	0.2	0.001	4.29718	4.29718	212.017	1	Z-007193	LOC108350558	gene		D:\assemblies\Rattus_norvegicus-Rnor_6.0-dbSNP149\Rattus_norvegicus-Rnor_6.0-dbSNP149.genometemplate\sequences\NC_005102_chr3.gbk#0	177699992	NC_005102.4	-	2004	68437926..68435923	108350558		LOC108350558
LOC102548277	0.001	0.972	0.251	0.001	1028.61	1028.61	265.218	1	Z-007198	LOC102548277	gene		D:\assemblies\Rattus_norvegicus-Rnor_6.0-dbSNP149\Rattus_norvegicus-Rnor_6.0-dbSNP149.genometemplate\sequences\NC_005102_chr3.gbk#0	177699992	NC_005102.4	-	20518	71105173..71084656	102548277, 7598318		LOC102548277
Ctnnd1	10.682	14.111	1.737	11.944	1.321	1.18143	0.145387	0.894343	Z-007207	Ctnnd1	gene		D:\assemblies\Rattus_norvegicus-Rnor_6.0-dbSNP149\Rattus_norvegicus-Rnor_6.0-dbSNP149.genometemplate\sequences\NC_005102_chr3.gbk#0	177699992	NC_005102.4	-	51144	72053047..72001904	311163, 1305643		Ctnnd1	Catns
Prg3	9.258	22.048	0.001	9.481	2.38155	2.3256	9.96901e-05	0.976507	Z-007227	Prg3	gene		D:\assemblies\Rattus_norvegicus-Rnor_6.0-dbSNP149\Rattus_norvegicus-Rnor_6.0-dbSNP149.genometemplate\sequences\NC_005102_chr3.gbk#0	177699992	NC_005102.4	+	6061	72395194..72401254	295706, 1309904		Prg3
LOC108350414	2.465	20.837	17.637	3.725	8.4531	5.59376	4.73488	0.661741	Z-007491	LOC108350414	gene		D:\assemblies\Rattus_norvegicus-Rnor_6.0-dbSNP149\Rattus_norvegicus-Rnor_6.0-dbSNP149.genometemplate\sequences\NC_005102_chr3.gbk#0	177699992	NC_005102.4	+	6313	79438812..79445124	108350414		LOC108350414
Celf1	6.866	10.132	1.973	10.189	1.4757	0.994382	0.193663	0.673838	Z-007504	Celf1	gene		D:\assemblies\Rattus_norvegicus-Rnor_6.0-dbSNP149\Rattus_norvegicus-Rnor_6.0-dbSNP149.genometemplate\sequences\NC_005102_chr3.gbk#0	177699992	NC_005102.4	+	75649	79768900..79844548	362160, 1307721		Celf1	Cugbp1
Rapsn	0.001	0.005	0.453	0.001	4.82035	4.82035	479.401	1	Z-007505	Rapsn	gene		D:\assemblies\Rattus_norvegicus-Rnor_6.0-dbSNP149\Rattus_norvegicus-Rnor_6.0-dbSNP149.genometemplate\sequences\NC_005102_chr3.gbk#0	177699992	NC_005102.4	+	9672	79859815..79869486	362161, 1311592		Rapsn	rapsyn
Nr1h3	19.983	44.752	4.771	31.05	2.23949	1.44131	0.153657	0.643587	Z-007513	Nr1h3	gene		D:\assemblies\Rattus_norvegicus-Rnor_6.0-dbSNP149\Rattus_norvegicus-Rnor_6.0-dbSNP149.genometemplate\sequences\NC_005102_chr3.gbk#0	177699992	NC_005102.4	-	10068	80014197..80004130	58852, 61909		Nr1h3	LXRalpha
Atg13	3.773	5.939	0.918	4.238	1.57411	1.40148	0.216605	0.890336	Z-007525	Atg13	gene		D:\assemblies\Rattus_norvegicus-Rnor_6.0-dbSNP149\Rattus_norvegicus-Rnor_6.0-dbSNP149.genometemplate\sequences\NC_005102_chr3.gbk#0	177699992	NC_005102.4	-	34006	80614554..80580549	362164, 1310685		Atg13	Harbi1, Harbi1l, RGD1310685
Creb3l1	2.569	4.508	0.364	2.871	1.75513	1.57035	0.126785	0.894721	Z-007532	Creb3l1	gene		D:\assemblies\Rattus_norvegicus-Rnor_6.0-dbSNP149\Rattus_norvegicus-Rnor_6.0-dbSNP149.genometemplate\sequences\NC_005102_chr3.gbk#0	177699992	NC_005102.4	-	40851	80933283..80892433	362165, 1359613		Creb3l1	Oasis
Large2	0.006	0.001	0.516	0.001	0.147589	1	545.503	6.77559	Z-007535	Large2	gene		D:\assemblies\Rattus_norvegicus-Rnor_6.0-dbSNP149\Rattus_norvegicus-Rnor_6.0-dbSNP149.genometemplate\sequences\NC_005102_chr3.gbk#0	177699992	NC_005102.4	-	9438	81285457..81276020	311202, 735214		Large2	Gyltl1b
Syt13	0.001	0.001	0.13	0.001	1	1	137.619	1	Z-007547	Syt13	gene		D:\assemblies\Rattus_norvegicus-Rnor_6.0-dbSNP149\Rattus_norvegicus-Rnor_6.0-dbSNP149.genometemplate\sequences\NC_005102_chr3.gbk#0	177699992	NC_005102.4	+	38168	81814287..81852454	80977, 621877		Syt13
Alx4	0.005	0.009	0.001	0.486	1.70056	0.0180132	0.0019444	0.0105925	Z-007553	Alx4	gene		D:\assemblies\Rattus_norvegicus-Rnor_6.0-dbSNP149\Rattus_norvegicus-Rnor_6.0-dbSNP149.genometemplate\sequences\NC_005102_chr3.gbk#0	177699992	NC_005102.4	+	36573	82548959..82585531	296511, 1310201		Alx4
Rag2	0.281	0.088	0.001	0.696	0.314735	0.127074	0.00135808	0.403749	Z-007574	Rag2	gene		D:\assemblies\Rattus_norvegicus-Rnor_6.0-dbSNP149\Rattus_norvegicus-Rnor_6.0-dbSNP149.genometemplate\sequences\NC_005102_chr3.gbk#0	177699992	NC_005102.4	+	8298	91191837..91200134	295953, 1305588		Rag2
Rag1	0.29	0.041	0.001	0.29	0.143047	0.142815	0.00325711	0.99838	Z-007575	Rag1	gene		D:\assemblies\Rattus_norvegicus-Rnor_6.0-dbSNP149\Rattus_norvegicus-Rnor_6.0-dbSNP149.genometemplate\sequences\NC_005102_chr3.gbk#0	177699992	NC_005102.4	-	11098	91217491..91206394	84600, 619790		Rag1
LOC102548825	0.001	0.001	0.113	0.001	1	1	119.081	1	Z-007592	LOC102548825	gene		D:\assemblies\Rattus_norvegicus-Rnor_6.0-dbSNP149\Rattus_norvegicus-Rnor_6.0-dbSNP149.genometemplate\sequences\NC_005102_chr3.gbk#0	177699992	NC_005102.4	+	11603	93096339..93107941	102548825, 7562021		LOC102548825
Ehf	0.001	0.001	0.521	0.001	1	1	551.593	1	Z-007593	Ehf	gene		D:\assemblies\Rattus_norvegicus-Rnor_6.0-dbSNP149\Rattus_norvegicus-Rnor_6.0-dbSNP149.genometemplate\sequences\NC_005102_chr3.gbk#0	177699992	NC_005102.4	-	40228	93216484..93176257	295965, 1310282		Ehf
Elf5	0.001	0.001	0.642	0.001	1	1	678.84	1	Z-007594	Elf5	gene		D:\assemblies\Rattus_norvegicus-Rnor_6.0-dbSNP149\Rattus_norvegicus-Rnor_6.0-dbSNP149.genometemplate\sequences\NC_005102_chr3.gbk#0	177699992	NC_005102.4	+	40941	93333514..93374454	366142, 1305859		Elf5
LOC102552075	0.001	0.007	0.244	0.001	7.00941	7.00941	258.479	1	Z-007605	LOC102552075	gene		D:\assemblies\Rattus_norvegicus-Rnor_6.0-dbSNP149\Rattus_norvegicus-Rnor_6.0-dbSNP149.genometemplate\sequences\NC_005102_chr3.gbk#0	177699992	NC_005102.4	-	3679	93919991..93916313	102552075, 7525020		LOC102552075
Cd59	9.832	10.679	0.471	6.675	1.08609	1.59988	0.0705764	1.47306	Z-007609	Cd59	gene		D:\assemblies\Rattus_norvegicus-Rnor_6.0-dbSNP149\Rattus_norvegicus-Rnor_6.0-dbSNP149.genometemplate\sequences\NC_005102_chr3.gbk#0	177699992	NC_005102.4	+	18180	94010481..94028660	25407, 2311		Cd59	Cd59a, Cd59b, MAC-IP, MACIF, MACIP
Mpped2	0.725	0.193	0.001	1.065	0.266268	0.181348	0.000887667	0.681072	Z-007636	Mpped2	gene		D:\assemblies\Rattus_norvegicus-Rnor_6.0-dbSNP149\Rattus_norvegicus-Rnor_6.0-dbSNP149.genometemplate\sequences\NC_005102_chr3.gbk#0	177699992	NC_005102.4	+	179428	97720308..97899735	362185, 735060		Mpped2	C11orf8, C11orf8h
Lpcat4	0.04	0.024	11.611	0.361	0.593645	0.0665902	32.1934	0.112172	Z-007708	Lpcat4	gene		D:\assemblies\Rattus_norvegicus-Rnor_6.0-dbSNP149\Rattus_norvegicus-Rnor_6.0-dbSNP149.genometemplate\sequences\NC_005102_chr3.gbk#0	177699992	NC_005102.4	+	8127	103725762..103733888	296048, 1311177		Lpcat4	Agpat7, RGD1311177
Arhgap11a	14.319	22.691	0.62	16.638	1.58472	1.36383	0.0372625	0.860608	Z-007724	Arhgap11a	gene		D:\assemblies\Rattus_norvegicus-Rnor_6.0-dbSNP149\Rattus_norvegicus-Rnor_6.0-dbSNP149.genometemplate\sequences\NC_005102_chr3.gbk#0	177699992	NC_005102.4	-	16282	105298108..105281827	296060, 1309107		Arhgap11a	RGD1309107
LOC102547459	1.236	4.63	0.001	1.289	3.74502	3.59337	0.000733483	0.959505	Z-007758	LOC102547459	gene		D:\assemblies\Rattus_norvegicus-Rnor_6.0-dbSNP149\Rattus_norvegicus-Rnor_6.0-dbSNP149.genometemplate\sequences\NC_005102_chr3.gbk#0	177699992	NC_005102.4	-	11797	109816899..109805103	102547459, 7678100		LOC102547459
Eif2ak4	0.844	1.353	4.476	0.989	1.60243	1.36856	4.52736	0.854057	Z-007762	Eif2ak4	gene		D:\assemblies\Rattus_norvegicus-Rnor_6.0-dbSNP149\Rattus_norvegicus-Rnor_6.0-dbSNP149.genometemplate\sequences\NC_005102_chr3.gbk#0	177699992	NC_005102.4	+	85759	110159624..110245382	114859, 1311439		Eif2ak4
Bub1b	4.165	6.344	0.827	5.225	1.523	1.21406	0.158271	0.79715	Z-007765	Bub1b	gene		D:\assemblies\Rattus_norvegicus-Rnor_6.0-dbSNP149\Rattus_norvegicus-Rnor_6.0-dbSNP149.genometemplate\sequences\NC_005102_chr3.gbk#0	177699992	NC_005102.4	+	52523	110367949..110420471	171576, 619791		Bub1b
Bahd1	2.753	4.128	0.736	3.686	1.49935	1.12	0.199673	0.746994	Z-007777	Bahd1	gene		D:\assemblies\Rattus_norvegicus-Rnor_6.0-dbSNP149\Rattus_norvegicus-Rnor_6.0-dbSNP149.genometemplate\sequences\NC_005102_chr3.gbk#0	177699992	NC_005102.4	+	23249	110708790..110732038	362194, 1563127		Bahd1
Rad51	1.649	4.249	0.695	3	2.57633	1.41639	0.231649	0.549769	Z-007782	Rad51	gene		D:\assemblies\Rattus_norvegicus-Rnor_6.0-dbSNP149\Rattus_norvegicus-Rnor_6.0-dbSNP149.genometemplate\sequences\NC_005102_chr3.gbk#0	177699992	NC_005102.4	+	24681	110918240..110942920	499870, 1563603		Rad51	RGD1563603
Dnajc17	2.686	6.406	27.807	3.653	2.38498	1.7537	7.61204	0.735312	Z-007785	Dnajc17	gene		D:\assemblies\Rattus_norvegicus-Rnor_6.0-dbSNP149\Rattus_norvegicus-Rnor_6.0-dbSNP149.genometemplate\sequences\NC_005102_chr3.gbk#0	177699992	NC_005102.4	-	33529	111013602..110980074	311329, 1308015		Dnajc17	RGD1308015
Zfyve19	0.924	0.253	20.374	2.127	0.27398	0.119039	9.58067	0.434479	Z-007787	Zfyve19	gene		D:\assemblies\Rattus_norvegicus-Rnor_6.0-dbSNP149\Rattus_norvegicus-Rnor_6.0-dbSNP149.genometemplate\sequences\NC_005102_chr3.gbk#0	177699992	NC_005102.4	+	7986	111013856..111021841	499871, 1561576		Zfyve19
Chp1	8.038	11.172	0.983	7.104	1.38989	1.57258	0.138304	1.13144	Z-007797	Chp1	gene		D:\assemblies\Rattus_norvegicus-Rnor_6.0-dbSNP149\Rattus_norvegicus-Rnor_6.0-dbSNP149.genometemplate\sequences\NC_005102_chr3.gbk#0	177699992	NC_005102.4	+	35493	111354506..111389998	64152, 620447		Chp1	Chp, Wrch2
Nusap1	5.306	11.833	2.227	10.612	2.22987	1.11502	0.209882	0.500038	Z-007800	Nusap1	gene		D:\assemblies\Rattus_norvegicus-Rnor_6.0-dbSNP149\Rattus_norvegicus-Rnor_6.0-dbSNP149.genometemplate\sequences\NC_005102_chr3.gbk#0	177699992	NC_005102.4	+	30334	111422267..111452600	311336, 1305764		Nusap1
Itpka	0.001	0.206	0.164	0.001	218.448	218.448	173.378	1	Z-007803	Itpka	gene		D:\assemblies\Rattus_norvegicus-Rnor_6.0-dbSNP149\Rattus_norvegicus-Rnor_6.0-dbSNP149.genometemplate\sequences\NC_005102_chr3.gbk#0	177699992	NC_005102.4	+	8599	111545007..111553605	81677, 619950		Itpka
Pla2g4b	0.065	1.18	3.187	0.272	18.0169	4.34121	11.7276	0.240952	Z-007810	Pla2g4b	gene		D:\assemblies\Rattus_norvegicus-Rnor_6.0-dbSNP149\Rattus_norvegicus-Rnor_6.0-dbSNP149.genometemplate\sequences\NC_005102_chr3.gbk#0	177699992	NC_005102.4	+	8608	111824919..111833526	311341, 1308658		Pla2g4b
Epb42	11.256	15.2	0.367	15.434	1.35034	0.984842	0.0237547	0.729329	Z-007837	Epb42	gene		D:\assemblies\Rattus_norvegicus-Rnor_6.0-dbSNP149\Rattus_norvegicus-Rnor_6.0-dbSNP149.genometemplate\sequences\NC_005102_chr3.gbk#0	177699992	NC_005102.4	-	18224	112985318..112967095	362202, 1305306		Epb42	Epb4.2
Pdia3	27.49	26.935	152.998	20.907	0.979803	1.28832	7.31808	1.31488	Z-007850	Pdia3	gene		D:\assemblies\Rattus_norvegicus-Rnor_6.0-dbSNP149\Rattus_norvegicus-Rnor_6.0-dbSNP149.genometemplate\sequences\NC_005102_chr3.gbk#0	177699992	NC_005102.4	+	23725	113376983..113400707	29468, 68430		Pdia3	ER60, ERp57, Grp58
Ell3	0.124	0.298	13.432	0.444	2.40602	0.671669	30.2246	0.279162	Z-007851	Ell3	gene		D:\assemblies\Rattus_norvegicus-Rnor_6.0-dbSNP149\Rattus_norvegicus-Rnor_6.0-dbSNP149.genometemplate\sequences\NC_005102_chr3.gbk#0	177699992	NC_005102.4	-	5475	113405869..113400395	296102, 1309917		Ell3
Wdr76	0.594	0.991	0.397	1.591	1.66774	0.62266	0.249527	0.373356	Z-007856	Wdr76	gene		D:\assemblies\Rattus_norvegicus-Rnor_6.0-dbSNP149\Rattus_norvegicus-Rnor_6.0-dbSNP149.genometemplate\sequences\NC_005102_chr3.gbk#0	177699992	NC_005102.4	+	33986	113445498..113479483	311361, 1309616		Wdr76
Spg11	0.537	1.166	4.725	0.81	2.17039	1.43945	5.83225	0.663224	Z-007861	Spg11	gene		D:\assemblies\Rattus_norvegicus-Rnor_6.0-dbSNP149\Rattus_norvegicus-Rnor_6.0-dbSNP149.genometemplate\sequences\NC_005102_chr3.gbk#0	177699992	NC_005102.4	-	64839	114064438..113999600	311372, 1562529		Spg11	RGD1562529
B2m	531.291	902.084	3556.01	510.394	1.69791	1.76743	6.96719	1.04094	Z-007863	B2m	gene		D:\assemblies\Rattus_norvegicus-Rnor_6.0-dbSNP149\Rattus_norvegicus-Rnor_6.0-dbSNP149.genometemplate\sequences\NC_005102_chr3.gbk#0	177699992	NC_005102.4	+	6025	114087287..114093311	24223, 2189		B2m
Sord	9.715	20.944	2.195	15.259	2.15589	1.37254	0.143823	0.636645	Z-007866	Sord	gene		D:\assemblies\Rattus_norvegicus-Rnor_6.0-dbSNP149\Rattus_norvegicus-Rnor_6.0-dbSNP149.genometemplate\sequences\NC_005102_chr3.gbk#0	177699992	NC_005102.4	+	31242	114176127..114207368	24788, 3734		Sord
LOC102556085	0.001	0.012	2.232	0.001	12.92	12.92	2361.77	1	Z-007874	LOC102556085	gene		D:\assemblies\Rattus_norvegicus-Rnor_6.0-dbSNP149\Rattus_norvegicus-Rnor_6.0-dbSNP149.genometemplate\sequences\NC_005102_chr3.gbk#0	177699992	NC_005102.4	+	1744	114650471..114652214	102556085, 7516973		LOC102556085
Gatm	12.291	20.221	0.54	13.387	1.64514	1.51047	0.0403244	0.91814	Z-007875	Gatm	gene		D:\assemblies\Rattus_norvegicus-Rnor_6.0-dbSNP149\Rattus_norvegicus-Rnor_6.0-dbSNP149.genometemplate\sequences\NC_005102_chr3.gbk#0	177699992	NC_005102.4	-	16586	114728155..114711570	81660, 71090		Gatm
Sqrdl	6.435	14.448	1.082	7.209	2.24523	2.00411	0.15005	0.892608	Z-007882	Sqrdl	gene		D:\assemblies\Rattus_norvegicus-Rnor_6.0-dbSNP149\Rattus_norvegicus-Rnor_6.0-dbSNP149.genometemplate\sequences\NC_005102_chr3.gbk#0	177699992	NC_005102.4	+	44432	114894944..114939375	691966, 1564504		Sqrdl	Cc2-17
Sema6d	1.919	2.449	0.092	2.165	1.27648	1.13115	0.0424586	0.886151	Z-007884	Sema6d	gene		D:\assemblies\Rattus_norvegicus-Rnor_6.0-dbSNP149\Rattus_norvegicus-Rnor_6.0-dbSNP149.genometemplate\sequences\NC_005102_chr3.gbk#0	177699992	NC_005102.4	+	58154	116899906..116958059	311384, 1310910		Sema6d
Slc24a5	3.228	4.923	13.925	2.353	1.52512	2.09178	5.91713	1.37155	Z-007888	Slc24a5	gene		D:\assemblies\Rattus_norvegicus-Rnor_6.0-dbSNP149\Rattus_norvegicus-Rnor_6.0-dbSNP149.genometemplate\sequences\NC_005102_chr3.gbk#0	177699992	NC_005102.4	+	19269	117335212..117354480	311387, 1310565		Slc24a5
Fgf7	7.822	13.726	0.94	11.821	1.75483	1.16121	0.0795582	0.661723	Z-007906	Fgf7	gene		D:\assemblies\Rattus_norvegicus-Rnor_6.0-dbSNP149\Rattus_norvegicus-Rnor_6.0-dbSNP149.genometemplate\sequences\NC_005102_chr3.gbk#0	177699992	NC_005102.4	+	52606	118315859..118368464	29348, 61805		Fgf7	Kgf
Slc27a2	0.001	0.001	0.089	0.001	1	1	94.5252	1	Z-007909	Slc27a2	gene		D:\assemblies\Rattus_norvegicus-Rnor_6.0-dbSNP149\Rattus_norvegicus-Rnor_6.0-dbSNP149.genometemplate\sequences\NC_005102_chr3.gbk#0	177699992	NC_005102.4	+	37912	119014620..119052531	65192, 71103		Slc27a2
Gpat2	0.001	0.004	0.103	0.001	3.73189	3.73189	108.67	1	Z-007934	Gpat2	gene		D:\assemblies\Rattus_norvegicus-Rnor_6.0-dbSNP149\Rattus_norvegicus-Rnor_6.0-dbSNP149.genometemplate\sequences\NC_005102_chr3.gbk#0	177699992	NC_005102.4	+	53170	119949921..120003090	296130, 1304904		Gpat2	RGD1304904
LOC102556271	0.084	0.077	0.001	0.501	0.909832	0.152777	0.00188615	0.167918	Z-007938	LOC102556271	gene		D:\assemblies\Rattus_norvegicus-Rnor_6.0-dbSNP149\Rattus_norvegicus-Rnor_6.0-dbSNP149.genometemplate\sequences\NC_005102_chr3.gbk#0	177699992	NC_005102.4	+	8076	120105803..120113878	102556271, 7727044		LOC102556271
Mall	0.04	0.006	0.001	0.41	0.160134	0.0154632	0.00230387	0.0965641	Z-007945	Mall	gene		D:\assemblies\Rattus_norvegicus-Rnor_6.0-dbSNP149\Rattus_norvegicus-Rnor_6.0-dbSNP149.genometemplate\sequences\NC_005102_chr3.gbk#0	177699992	NC_005102.4	-	34508	120307090..120272583	362211, 1310869		Mall	RGD1310869
Nphp1	2.328	3.424	0.254	2.904	1.47092	1.1791	0.0875098	0.801607	Z-007946	Nphp1	gene		D:\assemblies\Rattus_norvegicus-Rnor_6.0-dbSNP149\Rattus_norvegicus-Rnor_6.0-dbSNP149.genometemplate\sequences\NC_005102_chr3.gbk#0	177699992	NC_005102.4	-	54042	120370089..120316048	296136, 1308136		Nphp1
LOC106631776	12.085	34.406	70.602	17.398	2.84703	1.97756	4.05798	0.694605	Z-007947	LOC106631776	gene		D:\assemblies\Rattus_norvegicus-Rnor_6.0-dbSNP149\Rattus_norvegicus-Rnor_6.0-dbSNP149.genometemplate\sequences\NC_005102_chr3.gbk#0	177699992	NC_005102.4	-	859	120373523..120372665	106631776, 10401149		LOC106631776
Acoxl	0.001	0.001	0.087	0.001	1	1	92.3575	1	Z-007949	Acoxl	gene		D:\assemblies\Rattus_norvegicus-Rnor_6.0-dbSNP149\Rattus_norvegicus-Rnor_6.0-dbSNP149.genometemplate\sequences\NC_005102_chr3.gbk#0	177699992	NC_005102.4	+	310499	120414311..120724809	296138, 1306814		Acoxl
LOC102555576	0.379	1.139	0.038	0.339	3.00548	3.36381	0.113261	1.11923	Z-007952	LOC102555576	gene		D:\assemblies\Rattus_norvegicus-Rnor_6.0-dbSNP149\Rattus_norvegicus-Rnor_6.0-dbSNP149.genometemplate\sequences\NC_005102_chr3.gbk#0	177699992	NC_005102.4	+	25388	120785421..120810808	102555576, 7751632		LOC102555576
Tmem87b	0.329	0.5	5.173	0.607	1.51798	0.823258	8.52493	0.542339	Z-007958	Tmem87b	gene		D:\assemblies\Rattus_norvegicus-Rnor_6.0-dbSNP149\Rattus_norvegicus-Rnor_6.0-dbSNP149.genometemplate\sequences\NC_005102_chr3.gbk#0	177699992	NC_005102.4	+	35657	121357787..121393443	362212, 1307907		Tmem87b	RGD1307907
LOC102549592	0.246	0.084	1.034	0.191	0.342521	0.440873	5.3984	1.28714	Z-007967	LOC102549592	gene		D:\assemblies\Rattus_norvegicus-Rnor_6.0-dbSNP149\Rattus_norvegicus-Rnor_6.0-dbSNP149.genometemplate\sequences\NC_005102_chr3.gbk#0	177699992	NC_005102.4	-	4709	121707877..121703169	102549592, 7553263		LOC102549592
LOC102549265	0.776	1.646	0.001	1.288	2.12123	1.2777	0.000733689	0.60234	Z-007969	LOC102549265	gene		D:\assemblies\Rattus_norvegicus-Rnor_6.0-dbSNP149\Rattus_norvegicus-Rnor_6.0-dbSNP149.genometemplate\sequences\NC_005102_chr3.gbk#0	177699992	NC_005102.4	+	14720	121746728..121761447	102549265, 7635188		LOC102549265
Ckap2l	1.707	1.773	0.34	2.906	1.03862	0.610072	0.117105	0.587388	Z-007971	Ckap2l	gene		D:\assemblies\Rattus_norvegicus-Rnor_6.0-dbSNP149\Rattus_norvegicus-Rnor_6.0-dbSNP149.genometemplate\sequences\NC_005102_chr3.gbk#0	177699992	NC_005102.4	-	26132	121822352..121796221	680515, 1590645		Ckap2l
Sirpa	6.398	5.641	1.35	5.683	0.88161	0.992521	0.237527	1.1258	Z-007980	Sirpa	gene		D:\assemblies\Rattus_norvegicus-Rnor_6.0-dbSNP149\Rattus_norvegicus-Rnor_6.0-dbSNP149.genometemplate\sequences\NC_005102_chr3.gbk#0	177699992	NC_005102.4	+	38744	122113735..122152478	25528, 3449		Sirpa	Bit, Ptpns1, SHPS-1
Tgm6	0.001	0.001	0.057	0.001	1	1	59.9372	1	Z-007987	Tgm6	gene		D:\assemblies\Rattus_norvegicus-Rnor_6.0-dbSNP149\Rattus_norvegicus-Rnor_6.0-dbSNP149.genometemplate\sequences\NC_005102_chr3.gbk#0	177699992	NC_005102.4	+	35872	122644183..122680054	296152, 1565348		Tgm6
Nop56	6.035	15.083	84.62	8.607	2.49907	1.75237	9.83144	0.70121	Z-007990	Nop56	gene		D:\assemblies\Rattus_norvegicus-Rnor_6.0-dbSNP149\Rattus_norvegicus-Rnor_6.0-dbSNP149.genometemplate\sequences\NC_005102_chr3.gbk#0	177699992	NC_005102.4	+	4839	122803726..122808564	362214, 1308892		Nop56	Nol5a
Pced1a	1.89	3.378	27.765	2.005	1.78672	1.68434	13.8454	0.942696	Z-007996	Pced1a	gene		D:\assemblies\Rattus_norvegicus-Rnor_6.0-dbSNP149\Rattus_norvegicus-Rnor_6.0-dbSNP149.genometemplate\sequences\NC_005102_chr3.gbk#0	177699992	NC_005102.4	-	4994	122947171..122942178	296158, 1308836		Pced1a	Fam113a, RGD1308836
Vps16	2.809	6.23	40.374	3.777	2.21764	1.64931	10.6891	0.743723	Z-007997	Vps16	gene		D:\assemblies\Rattus_norvegicus-Rnor_6.0-dbSNP149\Rattus_norvegicus-Rnor_6.0-dbSNP149.genometemplate\sequences\NC_005102_chr3.gbk#0	177699992	NC_005102.4	+	21657	122947887..122969543	296159, 1359414		Vps16
RGD1565616	1.484	0.148	0.315	1.754	0.0994806	0.0841659	0.179277	0.846053	Z-008010	RGD1565616	gene		D:\assemblies\Rattus_norvegicus-Rnor_6.0-dbSNP149\Rattus_norvegicus-Rnor_6.0-dbSNP149.genometemplate\sequences\NC_005102_chr3.gbk#0	177699992	NC_005102.4	-	132586	123376458..123243873	499891, 1565616		RGD1565616
Siglec1	0.617	0.798	5.274	1.115	1.29319	0.716178	4.7309	0.553807	Z-008016	Siglec1	gene		D:\assemblies\Rattus_norvegicus-Rnor_6.0-dbSNP149\Rattus_norvegicus-Rnor_6.0-dbSNP149.genometemplate\sequences\NC_005102_chr3.gbk#0	177699992	NC_005102.4	-	19652	123631718..123612067	311426, 1311953		Siglec1	Sn
RGD1311739	12.393	30.809	3.661	19.176	2.48596	1.60662	0.190938	0.646276	Z-008018	RGD1311739	gene		D:\assemblies\Rattus_norvegicus-Rnor_6.0-dbSNP149\Rattus_norvegicus-Rnor_6.0-dbSNP149.genometemplate\sequences\NC_005102_chr3.gbk#0	177699992	NC_005102.4	-	14130	123702762..123688633	311428, 1311739		RGD1311739
Cenpb	19.175	27.292	5.392	22.1	1.42329	1.23492	0.243959	0.867654	Z-008020	Cenpb	gene		D:\assemblies\Rattus_norvegicus-Rnor_6.0-dbSNP149\Rattus_norvegicus-Rnor_6.0-dbSNP149.genometemplate\sequences\NC_005102_chr3.gbk#0	177699992	NC_005102.4	-	2633	123723520..123720888	362217, 1304794		Cenpb
Cdc25b	24.753	40.811	3.046	30.434	1.64873	1.34096	0.100087	0.813325	Z-008021	Cdc25b	gene		D:\assemblies\Rattus_norvegicus-Rnor_6.0-dbSNP149\Rattus_norvegicus-Rnor_6.0-dbSNP149.genometemplate\sequences\NC_005102_chr3.gbk#0	177699992	NC_005102.4	+	10158	123731539..123741696	171103, 621500		Cdc25b
Smox	20.144	48.94	3.697	23.597	2.42954	2.07401	0.156653	0.853665	Z-008030	Smox	gene		D:\assemblies\Rattus_norvegicus-Rnor_6.0-dbSNP149\Rattus_norvegicus-Rnor_6.0-dbSNP149.genometemplate\sequences\NC_005102_chr3.gbk#0	177699992	NC_005102.4	+	34931	124068796..124103726	308652, 1306049		Smox
Gpcpd1	6.604	12.839	1.38	7.86	1.94399	1.63343	0.175593	0.840247	Z-008044	Gpcpd1	gene		D:\assemblies\Rattus_norvegicus-Rnor_6.0-dbSNP149\Rattus_norvegicus-Rnor_6.0-dbSNP149.genometemplate\sequences\NC_005102_chr3.gbk#0	177699992	NC_005102.4	-	44468	125213598..125169131	362219, 735140		Gpcpd1	Gde5, Prei4, RGD735140
LOC102552951	0.004	0.031	2.751	0.115	7.48822	0.26912	23.8908	0.0359391	Z-008045	LOC102552951	gene		D:\assemblies\Rattus_norvegicus-Rnor_6.0-dbSNP149\Rattus_norvegicus-Rnor_6.0-dbSNP149.genometemplate\sequences\NC_005102_chr3.gbk#0	177699992	NC_005102.4	+	59656	125229953..125289608	102552951, 7636000		LOC102552951
Plcb4	2.088	2.514	0.286	3.155	1.20384	0.796639	0.0906808	0.66175	Z-008066	Plcb4	gene		D:\assemblies\Rattus_norvegicus-Rnor_6.0-dbSNP149\Rattus_norvegicus-Rnor_6.0-dbSNP149.genometemplate\sequences\NC_005102_chr3.gbk#0	177699992	NC_005102.4	+	370558	128601163..128971720	25031, 3345		Plcb4	Beta4aa, RATBETA4AA
LOC103691900	0.001	0.001	0.043	0.001	1	1	45.3867	1	Z-008067	LOC103691900	gene		D:\assemblies\Rattus_norvegicus-Rnor_6.0-dbSNP149\Rattus_norvegicus-Rnor_6.0-dbSNP149.genometemplate\sequences\NC_005102_chr3.gbk#0	177699992	NC_005102.4	+	3960	128869926..128873885	103691900, 9324167		LOC103691900
Bfsp1	0.848	3.088	0.173	1.507	3.64189	2.04884	0.114744	0.562575	Z-008106	Bfsp1	gene		D:\assemblies\Rattus_norvegicus-Rnor_6.0-dbSNP149\Rattus_norvegicus-Rnor_6.0-dbSNP149.genometemplate\sequences\NC_005102_chr3.gbk#0	177699992	NC_005102.4	-	57308	137992652..137935345	25394, 2205		Bfsp1	115-kDa, CP94, CP95, CP97
Dstn	93.926	177.361	28.972	126.784	1.88831	1.39892	0.228511	0.740832	Z-008107	Dstn	gene		D:\assemblies\Rattus_norvegicus-Rnor_6.0-dbSNP149\Rattus_norvegicus-Rnor_6.0-dbSNP149.genometemplate\sequences\NC_005102_chr3.gbk#0	177699992	NC_005102.4	+	26797	138024508..138051304	502674, 1588366		Dstn
Slc24a3	0.815	0.18	0.143	1.876	0.221145	0.0960887	0.0760674	0.434505	Z-008128	Slc24a3	gene		D:\assemblies\Rattus_norvegicus-Rnor_6.0-dbSNP149\Rattus_norvegicus-Rnor_6.0-dbSNP149.genometemplate\sequences\NC_005102_chr3.gbk#0	177699992	NC_005102.4	+	501787	139333942..139835728	85267, 69256		Slc24a3	Nckx3
Rin2	5.093	11.701	0.949	7.781	2.29757	1.50391	0.121916	0.654567	Z-008132	Rin2	gene		D:\assemblies\Rattus_norvegicus-Rnor_6.0-dbSNP149\Rattus_norvegicus-Rnor_6.0-dbSNP149.genometemplate\sequences\NC_005102_chr3.gbk#0	177699992	NC_005102.4	+	216350	139871330..140087679	311494, 1305873		Rin2
Thbd	4.583	7.569	0.396	8.088	1.65157	0.935858	0.0489623	0.566647	Z-008156	Thbd	gene		D:\assemblies\Rattus_norvegicus-Rnor_6.0-dbSNP149\Rattus_norvegicus-Rnor_6.0-dbSNP149.genometemplate\sequences\NC_005102_chr3.gbk#0	177699992	NC_005102.4	-	3653	142752325..142748673	83580, 621299		Thbd
LOC102547396	0.001	0.461	0.207	0.001	488.265	488.265	219.54	1	Z-008208	LOC102547396	gene		D:\assemblies\Rattus_norvegicus-Rnor_6.0-dbSNP149\Rattus_norvegicus-Rnor_6.0-dbSNP149.genometemplate\sequences\NC_005102_chr3.gbk#0	177699992	NC_005102.4	+	1944	146488849..146490792	102547396, 7656316		LOC102547396
Srxn1	1.668	5.117	0.001	2.608	3.06682	1.96168	0.000362337	0.639647	Z-008235	Srxn1	gene		D:\assemblies\Rattus_norvegicus-Rnor_6.0-dbSNP149\Rattus_norvegicus-Rnor_6.0-dbSNP149.genometemplate\sequences\NC_005102_chr3.gbk#0	177699992	NC_005102.4	+	5561	147608850..147614410	296271, 1307332		Srxn1	Ab2-390, Npn3
Sox12	2.335	0.138	0.435	2.79	0.0592139	0.0495539	0.155851	0.836863	Z-008242	Sox12	gene		D:\assemblies\Rattus_norvegicus-Rnor_6.0-dbSNP149\Rattus_norvegicus-Rnor_6.0-dbSNP149.genometemplate\sequences\NC_005102_chr3.gbk#0	177699992	NC_005102.4	-	1020	147865393..147864374	689988, 1586313		Sox12
Zcchc3	1.334	2.465	0.271	3.321	1.84762	0.742079	0.0816259	0.40164	Z-008243	Zcchc3	gene		D:\assemblies\Rattus_norvegicus-Rnor_6.0-dbSNP149\Rattus_norvegicus-Rnor_6.0-dbSNP149.genometemplate\sequences\NC_005102_chr3.gbk#0	177699992	NC_005102.4	-	4114	147881434..147877321	690005, 1585203		Zcchc3
Hm13	5.366	9.08	68.608	7.034	1.69204	1.29086	9.75349	0.762904	Z-008258	Hm13	gene		D:\assemblies\Rattus_norvegicus-Rnor_6.0-dbSNP149\Rattus_norvegicus-Rnor_6.0-dbSNP149.genometemplate\sequences\NC_005102_chr3.gbk#0	177699992	NC_005102.4	+	38929	148150695..148189623	311545, 1308946		Hm13	H13
Bcl2l1	16.12	33.82	1.072	17.039	2.09801	1.98484	0.0629299	0.946057	Z-008262	Bcl2l1	gene		D:\assemblies\Rattus_norvegicus-Rnor_6.0-dbSNP149\Rattus_norvegicus-Rnor_6.0-dbSNP149.genometemplate\sequences\NC_005102_chr3.gbk#0	177699992	NC_005102.4	-	54598	148314191..148259594	24888, 2200		Bcl2l1	bcl-X, Bcl-xl, Bcl2l, Bclx
Mylk2	3.35	5.064	0.001	3.176	1.51161	1.59471	0.000297628	1.05497	Z-008265	Mylk2	gene		D:\assemblies\Rattus_norvegicus-Rnor_6.0-dbSNP149\Rattus_norvegicus-Rnor_6.0-dbSNP149.genometemplate\sequences\NC_005102_chr3.gbk#0	177699992	NC_005102.4	+	11667	148386185..148397851	117558, 620934		Mylk2	Klmc, Mlck
Tm9sf4	0.889	0.061	4.51	0.937	0.0681767	0.0646738	4.8113	0.94862	Z-008275	Tm9sf4	gene		D:\assemblies\Rattus_norvegicus-Rnor_6.0-dbSNP149\Rattus_norvegicus-Rnor_6.0-dbSNP149.genometemplate\sequences\NC_005102_chr3.gbk#0	177699992	NC_005102.4	+	54140	148635822..148689961	296279, 1307768		Tm9sf4
Nol4l	1.2	1.797	0.328	1.628	1.49671	1.10346	0.201451	0.737255	Z-008283	Nol4l	gene		D:\assemblies\Rattus_norvegicus-Rnor_6.0-dbSNP149\Rattus_norvegicus-Rnor_6.0-dbSNP149.genometemplate\sequences\NC_005102_chr3.gbk#0	177699992	NC_005102.4	-	34750	148940426..148905677	362240, 1563510		Nol4l
Bpifb4	0.001	0.007	0.497	0.001	7.11014	7.11014	525.45	1	Z-008294	Bpifb4	gene		D:\assemblies\Rattus_norvegicus-Rnor_6.0-dbSNP149\Rattus_norvegicus-Rnor_6.0-dbSNP149.genometemplate\sequences\NC_005102_chr3.gbk#0	177699992	NC_005102.4	+	24959	149424392..149449350	499925, 1561174		Bpifb4	Lplunc4, RY2G5
E2f1	2.671	8.675	0.748	4.078	3.24817	2.12707	0.183313	0.654851	Z-008311	E2f1	gene		D:\assemblies\Rattus_norvegicus-Rnor_6.0-dbSNP149\Rattus_norvegicus-Rnor_6.0-dbSNP149.genometemplate\sequences\NC_005102_chr3.gbk#0	177699992	NC_005102.4	-	10827	150073721..150062895	399489, 728892		E2f1
Tp53inp2	6.81	0.48	0.79	6.982	0.0704236	0.0686922	0.11316	0.975414	Z-008327	Tp53inp2	gene		D:\assemblies\Rattus_norvegicus-Rnor_6.0-dbSNP149\Rattus_norvegicus-Rnor_6.0-dbSNP149.genometemplate\sequences\NC_005102_chr3.gbk#0	177699992	NC_005102.4	+	8128	150910398..150918525	362246, 735085		Tp53inp2	Trp53inp2
Edem2	2.097	2.478	22.356	1.349	1.18185	1.8369	16.572	1.55426	Z-008336	Edem2	gene		D:\assemblies\Rattus_norvegicus-Rnor_6.0-dbSNP149\Rattus_norvegicus-Rnor_6.0-dbSNP149.genometemplate\sequences\NC_005102_chr3.gbk#0	177699992	NC_005102.4	-	25819	151258559..151232741	296304, 1303074		Edem2	RGD1303074
Epb41l1	9.962	10.134	0.282	14.373	1.01726	0.705065	0.0195905	0.693103	Z-008364	Epb41l1	gene		D:\assemblies\Rattus_norvegicus-Rnor_6.0-dbSNP149\Rattus_norvegicus-Rnor_6.0-dbSNP149.genometemplate\sequences\NC_005102_chr3.gbk#0	177699992	NC_005102.4	+	129323	152492725..152622047	59317, 71087		Epb41l1	4.1N, Epb4.1l1
Myl9	149.733	313.56	16.003	182.735	2.09412	1.71593	0.0875728	0.819402	Z-008369	Myl9	gene		D:\assemblies\Rattus_norvegicus-Rnor_6.0-dbSNP149\Rattus_norvegicus-Rnor_6.0-dbSNP149.genometemplate\sequences\NC_005102_chr3.gbk#0	177699992	NC_005102.4	+	6389	152857573..152863961	296313, 1311235		Myl9
LOC102551821	0.001	0.007	0.001	0.249	6.90296	0.0262283	0.00379958	0.00379958	Z-008370	LOC102551821	gene		D:\assemblies\Rattus_norvegicus-Rnor_6.0-dbSNP149\Rattus_norvegicus-Rnor_6.0-dbSNP149.genometemplate\sequences\NC_005102_chr3.gbk#0	177699992	NC_005102.4	-	10338	152886391..152876054	102551821, 7616921		LOC102551821
Rbl1	1.755	1.674	0.294	2.46	0.954024	0.680342	0.119456	0.713128	Z-008381	Rbl1	gene		D:\assemblies\Rattus_norvegicus-Rnor_6.0-dbSNP149\Rattus_norvegicus-Rnor_6.0-dbSNP149.genometemplate\sequences\NC_005102_chr3.gbk#0	177699992	NC_005102.4	-	57660	153321351..153263692	680111, 1595511		Rbl1
LOC108350508	0.001	0.005	0.129	0.001	4.92954	4.92954	135.986	1	Z-008387	LOC108350508	gene		D:\assemblies\Rattus_norvegicus-Rnor_6.0-dbSNP149\Rattus_norvegicus-Rnor_6.0-dbSNP149.genometemplate\sequences\NC_005102_chr3.gbk#0	177699992	NC_005102.4	-	4641	153547652..153543012	108350508		LOC108350508
Src	13.2	20.921	2.047	12.72	1.58485	1.64477	0.160945	1.03781	Z-008389	Src	gene		D:\assemblies\Rattus_norvegicus-Rnor_6.0-dbSNP149\Rattus_norvegicus-Rnor_6.0-dbSNP149.genometemplate\sequences\NC_005102_chr3.gbk#0	177699992	NC_005102.4	+	47837	153547807..153595643	83805, 620795		Src
LOC100911299	0.014	0.002	0.4	0.001	0.161991	2.37138	423.322	14.639	Z-008393	LOC100911299	gene		D:\assemblies\Rattus_norvegicus-Rnor_6.0-dbSNP149\Rattus_norvegicus-Rnor_6.0-dbSNP149.genometemplate\sequences\NC_005102_chr3.gbk#0	177699992	NC_005102.4	-	11960	154038058..154026099	100911299, 6494064		LOC100911299
Ctnnbl1	6.225	8.136	31.498	6.028	1.30704	1.34966	5.22503	1.03261	Z-008397	Ctnnbl1	gene		D:\assemblies\Rattus_norvegicus-Rnor_6.0-dbSNP149\Rattus_norvegicus-Rnor_6.0-dbSNP149.genometemplate\sequences\NC_005102_chr3.gbk#0	177699992	NC_005102.4	+	160926	154212245..154373170	296320, 1563558		Ctnnbl1
Lbp	7.328	11.979	0.188	4.585	1.63462	2.61261	0.0411022	1.5983	Z-008406	Lbp	gene		D:\assemblies\Rattus_norvegicus-Rnor_6.0-dbSNP149\Rattus_norvegicus-Rnor_6.0-dbSNP149.genometemplate\sequences\NC_005102_chr3.gbk#0	177699992	NC_005102.4	+	26679	154786232..154812910	29469, 61865		Lbp	Bpifd2
Actr5	1.243	2.689	8.554	1.511	2.16314	1.77959	5.66002	0.822689	Z-008415	Actr5	gene		D:\assemblies\Rattus_norvegicus-Rnor_6.0-dbSNP149\Rattus_norvegicus-Rnor_6.0-dbSNP149.genometemplate\sequences\NC_005102_chr3.gbk#0	177699992	NC_005102.4	+	13507	155118567..155132073	362258, 1307958		Actr5
Mafb	21.355	36.538	1.236	26.008	1.71101	1.40489	0.0475294	0.821089	Z-008423	Mafb	gene		D:\assemblies\Rattus_norvegicus-Rnor_6.0-dbSNP149\Rattus_norvegicus-Rnor_6.0-dbSNP149.genometemplate\sequences\NC_005102_chr3.gbk#0	177699992	NC_005102.4	-	1921	156340913..156338993	54264, 2982		Mafb	b-maf, Krml
Top1	11.39	17.815	3.759	15.048	1.56412	1.18384	0.249807	0.756876	Z-008430	Top1	gene		D:\assemblies\Rattus_norvegicus-Rnor_6.0-dbSNP149\Rattus_norvegicus-Rnor_6.0-dbSNP149.genometemplate\sequences\NC_005102_chr3.gbk#0	177699992	NC_005102.4	+	81999	156635688..156717686	64550, 621246		Top1	Ab2-086
LOC102551164	1.502	0.337	19.95	2.829	0.224572	0.119231	7.0521	0.530923	Z-008431	LOC102551164	gene		D:\assemblies\Rattus_norvegicus-Rnor_6.0-dbSNP149\Rattus_norvegicus-Rnor_6.0-dbSNP149.genometemplate\sequences\NC_005102_chr3.gbk#0	177699992	NC_005102.4	-	8958	156727431..156718474	102551164, 7588290		LOC102551164
LOC108350515	0.03	0.571	0.001	0.16	19.0007	3.56826	0.00590538	0.187796	Z-008441	LOC108350515	gene		D:\assemblies\Rattus_norvegicus-Rnor_6.0-dbSNP149\Rattus_norvegicus-Rnor_6.0-dbSNP149.genometemplate\sequences\NC_005102_chr3.gbk#0	177699992	NC_005102.4	+	15343	157113335..157128677	108350515		LOC108350515
Srsf6	14.716	38.148	94.91	23.538	2.5922	1.6207	4.03219	0.62522	Z-008464	Srsf6	gene		D:\assemblies\Rattus_norvegicus-Rnor_6.0-dbSNP149\Rattus_norvegicus-Rnor_6.0-dbSNP149.genometemplate\sequences\NC_005102_chr3.gbk#0	177699992	NC_005102.4	+	5324	159305345..159310668	362264, 1359241		Srsf6	Sfrs6
Mybl2	8.514	16.316	1.973	11.72	1.91645	1.39217	0.168337	0.726433	Z-008468	Mybl2	gene		D:\assemblies\Rattus_norvegicus-Rnor_6.0-dbSNP149\Rattus_norvegicus-Rnor_6.0-dbSNP149.genometemplate\sequences\NC_005102_chr3.gbk#0	177699992	NC_005102.4	+	28450	159421638..159450087	296344, 1308474		Mybl2
Wisp2	0.114	1.018	0.001	0.798	8.9715	1.27606	0.0011842	0.142235	Z-008483	Wisp2	gene		D:\assemblies\Rattus_norvegicus-Rnor_6.0-dbSNP149\Rattus_norvegicus-Rnor_6.0-dbSNP149.genometemplate\sequences\NC_005102_chr3.gbk#0	177699992	NC_005102.4	+	11348	160207969..160219316	29576, 621867		Wisp2	CCN5
Slpil2	0.065	0.152	17.276	0.511	2.32866	0.297085	33.7883	0.127577	Z-008503	Slpil2	gene		D:\assemblies\Rattus_norvegicus-Rnor_6.0-dbSNP149\Rattus_norvegicus-Rnor_6.0-dbSNP149.genometemplate\sequences\NC_005102_chr3.gbk#0	177699992	NC_005102.4	-	2247	160738923..160736677	408229, 1303102		Slpil2
Slpi	2.244	7.448	151.373	2.259	3.31963	3.29633	66.9955	0.992981	Z-008505	Slpi	gene		D:\assemblies\Rattus_norvegicus-Rnor_6.0-dbSNP149\Rattus_norvegicus-Rnor_6.0-dbSNP149.genometemplate\sequences\NC_005102_chr3.gbk#0	177699992	NC_005102.4	-	2250	160802228..160799979	84386, 621768		Slpi
Rbpjl	0.001	0.005	1.987	0.001	5.5953	5.5953	2102.1	1	Z-008507	Rbpjl	gene		D:\assemblies\Rattus_norvegicus-Rnor_6.0-dbSNP149\Rattus_norvegicus-Rnor_6.0-dbSNP149.genometemplate\sequences\NC_005102_chr3.gbk#0	177699992	NC_005102.4	+	13290	160851836..160865125	362268, 1304786		Rbpjl	Rbpsuhl
Dbndd2	21.976	40.363	3.598	31.613	1.83672	1.27677	0.113798	0.695136	Z-008511	Dbndd2	gene		D:\assemblies\Rattus_norvegicus-Rnor_6.0-dbSNP149\Rattus_norvegicus-Rnor_6.0-dbSNP149.genometemplate\sequences\NC_005102_chr3.gbk#0	177699992	NC_005102.4	+	4636	160933833..160938468	499941, 1559521		Dbndd2
Snx21	4.39	6.431	0.783	6.503	1.46491	0.988858	0.120358	0.675032	Z-008531	Snx21	gene		D:\assemblies\Rattus_norvegicus-Rnor_6.0-dbSNP149\Rattus_norvegicus-Rnor_6.0-dbSNP149.genometemplate\sequences\NC_005102_chr3.gbk#0	177699992	NC_005102.4	+	9247	161252634..161261880	100362940, 2323753		Snx21
LOC102554906	0.705	1.172	5.908	0.77	1.662	1.52181	7.674	0.915646	Z-008540	LOC102554906	gene		D:\assemblies\Rattus_norvegicus-Rnor_6.0-dbSNP149\Rattus_norvegicus-Rnor_6.0-dbSNP149.genometemplate\sequences\NC_005102_chr3.gbk#0	177699992	NC_005102.4	-	2603	161350903..161348301	102554906, 7694697		LOC102554906
Slc12a5	0.004	0.009	0.14	0.001	2.23641	9.55863	148.168	4.27409	Z-008545	Slc12a5	gene		D:\assemblies\Rattus_norvegicus-Rnor_6.0-dbSNP149\Rattus_norvegicus-Rnor_6.0-dbSNP149.genometemplate\sequences\NC_005102_chr3.gbk#0	177699992	NC_005102.4	+	31776	161433303..161465078	171373, 620811		Slc12a5	Kcc2
Cd40	0.907	1.834	39.117	1.192	2.02206	1.5383	32.809	0.760762	Z-008547	Cd40	gene		D:\assemblies\Rattus_norvegicus-Rnor_6.0-dbSNP149\Rattus_norvegicus-Rnor_6.0-dbSNP149.genometemplate\sequences\NC_005102_chr3.gbk#0	177699992	NC_005102.4	+	15155	161519789..161534943	171369, 619830		Cd40	Tnfrsf5
Elmo2	3.989	4.046	1.274	5.249	1.01421	0.770807	0.242646	0.760007	Z-008550	Elmo2	gene		D:\assemblies\Rattus_norvegicus-Rnor_6.0-dbSNP149\Rattus_norvegicus-Rnor_6.0-dbSNP149.genometemplate\sequences\NC_005102_chr3.gbk#0	177699992	NC_005102.4	-	37533	161850006..161812474	362271, 1305784		Elmo2
LOC102555457	3.465	2.576	0.762	4.152	0.74354	0.620518	0.183614	0.834546	Z-008553	LOC102555457	gene		D:\assemblies\Rattus_norvegicus-Rnor_6.0-dbSNP149\Rattus_norvegicus-Rnor_6.0-dbSNP149.genometemplate\sequences\NC_005102_chr3.gbk#0	177699992	NC_005102.4	-	31876	162003627..161971752	102555457, 7581003		LOC102555457
Slc2a10	0.04	0.051	0.001	0.199	1.27897	0.256645	0.00474333	0.200665	Z-008560	Slc2a10	gene		D:\assemblies\Rattus_norvegicus-Rnor_6.0-dbSNP149\Rattus_norvegicus-Rnor_6.0-dbSNP149.genometemplate\sequences\NC_005102_chr3.gbk#0	177699992	NC_005102.4	+	12455	162182156..162194610	366251, 1306552		Slc2a10
Stau1	5.933	5.72	1.544	7.058	0.964234	0.810447	0.218759	0.840509	Z-008575	Stau1	gene		D:\assemblies\Rattus_norvegicus-Rnor_6.0-dbSNP149\Rattus_norvegicus-Rnor_6.0-dbSNP149.genometemplate\sequences\NC_005102_chr3.gbk#0	177699992	NC_005102.4	-	45793	163748996..163703204	84496, 621778		Stau1	Stau
LOC100911177	31.676	92.68	318.719	34.916	2.9259	2.65436	9.12813	0.907195	Z-008579	LOC100911177	gene		D:\assemblies\Rattus_norvegicus-Rnor_6.0-dbSNP149\Rattus_norvegicus-Rnor_6.0-dbSNP149.genometemplate\sequences\NC_005102_chr3.gbk#0	177699992	NC_005102.4	+	2592	163815320..163817911	100911177, 6494811		LOC100911177
LOC685963	84.501	231.42	2821.84	106.003	2.73865	2.18315	26.6205	0.797164	Z-008583	LOC685963	gene		D:\assemblies\Rattus_norvegicus-Rnor_6.0-dbSNP149\Rattus_norvegicus-Rnor_6.0-dbSNP149.genometemplate\sequences\NC_005102_chr3.gbk#0	177699992	NC_005102.4	+	340	164002409..164002748	685963, 1587812		LOC685963
Ube2v1	14.19	26.949	4.26	18.087	1.89922	1.49003	0.235559	0.784546	Z-008591	Ube2v1	gene		D:\assemblies\Rattus_norvegicus-Rnor_6.0-dbSNP149\Rattus_norvegicus-Rnor_6.0-dbSNP149.genometemplate\sequences\NC_005102_chr3.gbk#0	177699992	NC_005102.4	-	22852	164366684..164343833	296390, 1305503		Ube2v1
LOC102552887	0.003	0.003	0.012	0.001	1.07895	3.31757	12.7503	3.07482	Z-008600	LOC102552887	gene		D:\assemblies\Rattus_norvegicus-Rnor_6.0-dbSNP149\Rattus_norvegicus-Rnor_6.0-dbSNP149.genometemplate\sequences\NC_005102_chr3.gbk#0	177699992	NC_005102.4	-	9118	164839698..164830581	102552887, 7713786		LOC102552887
LOC102552784	0.002	0.004	0.097	0.001	1.60029	3.94046	102.306	2.46234	Z-008649	LOC102552784	gene		D:\assemblies\Rattus_norvegicus-Rnor_6.0-dbSNP149\Rattus_norvegicus-Rnor_6.0-dbSNP149.genometemplate\sequences\NC_005102_chr3.gbk#0	177699992	NC_005102.4	-	5711	168491904..168486194	102552784, 7497111		LOC102552784
Cass4	0.976	2.067	0.069	1.267	2.11783	1.63148	0.0542583	0.770354	Z-008664	Cass4	gene		D:\assemblies\Rattus_norvegicus-Rnor_6.0-dbSNP149\Rattus_norvegicus-Rnor_6.0-dbSNP149.genometemplate\sequences\NC_005102_chr3.gbk#0	177699992	NC_005102.4	+	39886	170398496..170438381	296409, 1310643		Cass4	RGD1310643
Spo11	0.001	0.001	2.185	0.001	1	1	2312.33	1	Z-008673	Spo11	gene		D:\assemblies\Rattus_norvegicus-Rnor_6.0-dbSNP149\Rattus_norvegicus-Rnor_6.0-dbSNP149.genometemplate\sequences\NC_005102_chr3.gbk#0	177699992	NC_005102.4	+	16654	170991573..171008226	366261, 1306454		Spo11
Rbm38	52.396	118.63	8.658	73.887	2.2641	1.60555	0.117183	0.709134	Z-008675	Rbm38	gene		D:\assemblies\Rattus_norvegicus-Rnor_6.0-dbSNP149\Rattus_norvegicus-Rnor_6.0-dbSNP149.genometemplate\sequences\NC_005102_chr3.gbk#0	177699992	NC_005102.4	+	12610	171037891..171050500	366262, 1308503		Rbm38	Rnpc1
Zbp1	0.456	1.576	35.554	0.674	3.4571	2.33734	52.727	0.676099	Z-008681	Zbp1	gene		D:\assemblies\Rattus_norvegicus-Rnor_6.0-dbSNP149\Rattus_norvegicus-Rnor_6.0-dbSNP149.genometemplate\sequences\NC_005102_chr3.gbk#0	177699992	NC_005102.4	-	16001	171292062..171276062	171091, 619956		Zbp1	Dlm1
Apcdd1l	0.706	4.13	0.209	1.082	5.85261	3.81644	0.193361	0.652092	Z-008691	Apcdd1l	gene		D:\assemblies\Rattus_norvegicus-Rnor_6.0-dbSNP149\Rattus_norvegicus-Rnor_6.0-dbSNP149.genometemplate\sequences\NC_005102_chr3.gbk#0	177699992	NC_005102.4	-	78428	171958155..171879728	499949, 1562045		Apcdd1l
Psma7	55.458	123.831	342.224	75.937	2.2329	1.63072	4.5067	0.730314	Z-008732	Psma7	gene		D:\assemblies\Rattus_norvegicus-Rnor_6.0-dbSNP149\Rattus_norvegicus-Rnor_6.0-dbSNP149.genometemplate\sequences\NC_005102_chr3.gbk#0	177699992	NC_005102.4	-	6343	175426384..175420042	29674, 61851		Psma7
Lama5	0.175	0.198	0.609	0.069	1.13222	2.88743	8.87249	2.55023	Z-008738	Lama5	gene		D:\assemblies\Rattus_norvegicus-Rnor_6.0-dbSNP149\Rattus_norvegicus-Rnor_6.0-dbSNP149.genometemplate\sequences\NC_005102_chr3.gbk#0	177699992	NC_005102.4	-	48071	175601112..175553042	140433, 621023		Lama5
Rps21	484.586	1329.94	4064.75	584.752	2.74449	2.27437	6.95124	0.828704	Z-008739	Rps21	gene		D:\assemblies\Rattus_norvegicus-Rnor_6.0-dbSNP149\Rattus_norvegicus-Rnor_6.0-dbSNP149.genometemplate\sequences\NC_005102_chr3.gbk#0	177699992	NC_005102.4	+	1023	175629176..175630198	81775, 621038		Rps21
LOC103691993	0.008	0.001	0.499	0.001	0.125579	1	527.579	7.96311	Z-008741	LOC103691993	gene		D:\assemblies\Rattus_norvegicus-Rnor_6.0-dbSNP149\Rattus_norvegicus-Rnor_6.0-dbSNP149.genometemplate\sequences\NC_005102_chr3.gbk#0	177699992	NC_005102.4	+	2764	175645057..175647820	103691993, 9285524		LOC103691993
Mrgbp	2.788	5.43	24.973	3.345	1.94755	1.62337	7.46599	0.833541	Z-008752	Mrgbp	gene		D:\assemblies\Rattus_norvegicus-Rnor_6.0-dbSNP149\Rattus_norvegicus-Rnor_6.0-dbSNP149.genometemplate\sequences\NC_005102_chr3.gbk#0	177699992	NC_005102.4	+	3470	175924456..175927925	311713, 1308612		Mrgbp	RGD1308612
LOC108350539	0.51	2.994	11.083	0.412	5.87107	7.26596	26.8928	1.23759	Z-008758	LOC108350539	gene		D:\assemblies\Rattus_norvegicus-Rnor_6.0-dbSNP149\Rattus_norvegicus-Rnor_6.0-dbSNP149.genometemplate\sequences\NC_005102_chr3.gbk#0	177699992	NC_005102.4	+	19522	176144339..176163860	108350539		LOC108350539
LOC108350541	0.001	0.008	5.117	0.001	8.05733	8.05733	5414.53	1	Z-008777	LOC108350541	gene		D:\assemblies\Rattus_norvegicus-Rnor_6.0-dbSNP149\Rattus_norvegicus-Rnor_6.0-dbSNP149.genometemplate\sequences\NC_005102_chr3.gbk#0	177699992	NC_005102.4	+	4260	176715981..176720240	108350541		LOC108350541
Rtel1	1.014	2.024	9.357	1.725	1.9967	1.17391	5.42548	0.587922	Z-008782	Rtel1	gene		D:\assemblies\Rattus_norvegicus-Rnor_6.0-dbSNP149\Rattus_norvegicus-Rnor_6.0-dbSNP149.genometemplate\sequences\NC_005102_chr3.gbk#0	177699992	NC_005102.4	+	38520	176818012..176856531	362288, 1306721		Rtel1	RGD1306721
Lime1	0.275	0.439	19.172	0.339	1.59875	1.29616	56.5851	0.810738	Z-008785	Lime1	gene		D:\assemblies\Rattus_norvegicus-Rnor_6.0-dbSNP149\Rattus_norvegicus-Rnor_6.0-dbSNP149.genometemplate\sequences\NC_005102_chr3.gbk#0	177699992	NC_005102.4	+	6350	176881881..176888230	362289, 1562795		Lime1	RGD1562795
Zbtb46	1.01	0.241	0.425	1.808	0.23851	0.133228	0.234822	0.558584	Z-008786	Zbtb46	gene		D:\assemblies\Rattus_norvegicus-Rnor_6.0-dbSNP149\Rattus_norvegicus-Rnor_6.0-dbSNP149.genometemplate\sequences\NC_005102_chr3.gbk#0	177699992	NC_005102.4	-	70508	176959009..176888502	311718, 1307408		Zbtb46	Btbd4
Sox18	15.711	25.605	2.706	23.553	1.62978	1.0871	0.114894	0.667027	Z-008797	Sox18	gene		D:\assemblies\Rattus_norvegicus-Rnor_6.0-dbSNP149\Rattus_norvegicus-Rnor_6.0-dbSNP149.genometemplate\sequences\NC_005102_chr3.gbk#0	177699992	NC_005102.4	-	1803	177179039..177177237	311723, 1311718		Sox18
Myt1	0.001	0.001	0.064	0.001	1	1	67.3013	1	Z-008802	Myt1	gene		D:\assemblies\Rattus_norvegicus-Rnor_6.0-dbSNP149\Rattus_norvegicus-Rnor_6.0-dbSNP149.genometemplate\sequences\NC_005102_chr3.gbk#0	177699992	NC_005102.4	+	60186	177281365..177341550	362291, 1304899		Myt1
LOC102546975	0.001	0.001	0.05	0.001	1	1	53.1264	1	Z-008826	LOC102546975	gene		D:\assemblies\Rattus_norvegicus-Rnor_6.0-dbSNP149\Rattus_norvegicus-Rnor_6.0-dbSNP149.genometemplate\sequences\NC_005103_chr4.gbk#0	184226339	NC_005103.4	+	8070	727831..735900	102546975, 7585075		LOC102546975
LOC108350643	0.01	0.001	0.408	0.001	0.0976122	1	431.407	10.2446	Z-008873	LOC108350643	gene		D:\assemblies\Rattus_norvegicus-Rnor_6.0-dbSNP149\Rattus_norvegicus-Rnor_6.0-dbSNP149.genometemplate\sequences\NC_005103_chr4.gbk#0	184226339	NC_005103.4	+	1254	4005884..4007137	108350643		LOC108350643
LOC100910079	0.111	0.151	0.001	0.424	1.35574	0.356243	0.00222885	0.262766	Z-008879	LOC100910079	gene		D:\assemblies\Rattus_norvegicus-Rnor_6.0-dbSNP149\Rattus_norvegicus-Rnor_6.0-dbSNP149.genometemplate\sequences\NC_005103_chr4.gbk#0	184226339	NC_005103.4	-	51784	5773357..5721574	100910079, 6500542		LOC100910079
Wdr86	1.759	0.174	0.334	2.048	0.0990807	0.0851073	0.163195	0.85897	Z-008896	Wdr86	gene		D:\assemblies\Rattus_norvegicus-Rnor_6.0-dbSNP149\Rattus_norvegicus-Rnor_6.0-dbSNP149.genometemplate\sequences\NC_005103_chr4.gbk#0	184226339	NC_005103.4	+	6498	6942415..6948912	311956, 1566180		Wdr86	RGD1566180
Fastk	8.063	14.052	48.609	10.484	1.74281	1.34029	4.63631	0.769038	Z-008910	Fastk	gene		D:\assemblies\Rattus_norvegicus-Rnor_6.0-dbSNP149\Rattus_norvegicus-Rnor_6.0-dbSNP149.genometemplate\sequences\NC_005103_chr4.gbk#0	184226339	NC_005103.4	+	4070	7260521..7264590	296741, 1311601		Fastk
LOC100909675	3.539	11.25	46.597	4.766	3.17834	2.36045	9.77724	0.742667	Z-008928	LOC100909675	gene		D:\assemblies\Rattus_norvegicus-Rnor_6.0-dbSNP149\Rattus_norvegicus-Rnor_6.0-dbSNP149.genometemplate\sequences\NC_005103_chr4.gbk#0	184226339	NC_005103.4	-	4216	7822858..7818643	100909675, 6502346		LOC100909675
Dnajc2	6.641	12.563	41.927	6	1.89184	2.09379	6.98752	1.10675	Z-008941	Dnajc2	gene		D:\assemblies\Rattus_norvegicus-Rnor_6.0-dbSNP149\Rattus_norvegicus-Rnor_6.0-dbSNP149.genometemplate\sequences\NC_005103_chr4.gbk#0	184226339	NC_005103.4	+	27189	9881505..9908693	116456, 620524		Dnajc2	MIDA1, Zrf2
Pmpcb	6.337	14.395	47.491	8.876	2.27153	1.62181	5.35041	0.713973	Z-008942	Pmpcb	gene		D:\assemblies\Rattus_norvegicus-Rnor_6.0-dbSNP149\Rattus_norvegicus-Rnor_6.0-dbSNP149.genometemplate\sequences\NC_005103_chr4.gbk#0	184226339	NC_005103.4	-	12778	9921615..9908838	64198, 621297		Pmpcb	Mppb
Aptr	0.005	0.055	4.857	0.196	10.9166	0.279676	24.8418	0.0256193	Z-008953	Aptr	gene		D:\assemblies\Rattus_norvegicus-Rnor_6.0-dbSNP149\Rattus_norvegicus-Rnor_6.0-dbSNP149.genometemplate\sequences\NC_005103_chr4.gbk#0	184226339	NC_005103.4	-	1303	10749291..10747989	104968332, 9685233		Aptr
Gnai1	2.776	5.155	0.243	2.418	1.85694	2.13242	0.100443	1.14835	Z-008964	Gnai1	gene		D:\assemblies\Rattus_norvegicus-Rnor_6.0-dbSNP149\Rattus_norvegicus-Rnor_6.0-dbSNP149.genometemplate\sequences\NC_005103_chr4.gbk#0	184226339	NC_005103.4	+	81731	13405136..13486866	25686, 2713		Gnai1	BPGTPB
Tmem243	4.401	4.864	52.926	7.788	1.10531	0.624577	6.79586	0.565068	Z-009000	Tmem243	gene		D:\assemblies\Rattus_norvegicus-Rnor_6.0-dbSNP149\Rattus_norvegicus-Rnor_6.0-dbSNP149.genometemplate\sequences\NC_005103_chr4.gbk#0	184226339	NC_005103.4	-	17849	21920651..21902803	499990, 1562351		Tmem243	RGD1562351
Mterf1	4.687	12.814	36.061	6.8	2.73371	1.88429	5.30278	0.689278	Z-009040	Mterf1	gene		D:\assemblies\Rattus_norvegicus-Rnor_6.0-dbSNP149\Rattus_norvegicus-Rnor_6.0-dbSNP149.genometemplate\sequences\NC_005103_chr4.gbk#0	184226339	NC_005103.4	+	7065	27365310..27372374	85261, 621318		Mterf1	Mterf
LOC108350667	0.004	0.001	0.035	0.001	0.25872	1	36.5267	3.86518	Z-009043	LOC108350667	gene		D:\assemblies\Rattus_norvegicus-Rnor_6.0-dbSNP149\Rattus_norvegicus-Rnor_6.0-dbSNP149.genometemplate\sequences\NC_005103_chr4.gbk#0	184226339	NC_005103.4	-	4611	27509129..27504519	108350667		LOC108350667
Hepacam2	0.001	0.087	0.664	0.001	91.6221	91.6221	702.978	1	Z-009056	Hepacam2	gene		D:\assemblies\Rattus_norvegicus-Rnor_6.0-dbSNP149\Rattus_norvegicus-Rnor_6.0-dbSNP149.genometemplate\sequences\NC_005103_chr4.gbk#0	184226339	NC_005103.4	-	34861	28437722..28402862	296846, 1305697		Hepacam2	RGD1305697
Gng11	70.959	164.543	11.339	83.462	2.31884	1.97146	0.135858	0.850194	Z-009064	Gng11	gene		D:\assemblies\Rattus_norvegicus-Rnor_6.0-dbSNP149\Rattus_norvegicus-Rnor_6.0-dbSNP149.genometemplate\sequences\NC_005103_chr4.gbk#0	184226339	NC_005103.4	+	5441	28989170..28994610	64199, 621515		Gng11
LOC108350670	0.007	0.036	24.182	0.096	5.44977	0.379283	252.529	0.0695962	Z-009071	LOC108350670	gene		D:\assemblies\Rattus_norvegicus-Rnor_6.0-dbSNP149\Rattus_norvegicus-Rnor_6.0-dbSNP149.genometemplate\sequences\NC_005103_chr4.gbk#0	184226339	NC_005103.4	+	4233	29652914..29657146	108350670		LOC108350670
Peg10	0.001	0.031	0.001	0.186	32.8499	0.167231	0.00509076	0.00509076	Z-009073	Peg10	gene		D:\assemblies\Rattus_norvegicus-Rnor_6.0-dbSNP149\Rattus_norvegicus-Rnor_6.0-dbSNP149.genometemplate\sequences\NC_005103_chr4.gbk#0	184226339	NC_005103.4	+	8994	29795524..29804517	102553587, 1595574		Peg10
Dync1i1	0.177	0.477	0.001	0.109	2.695	4.38223	0.00867407	1.62606	Z-009082	Dync1i1	gene		D:\assemblies\Rattus_norvegicus-Rnor_6.0-dbSNP149\Rattus_norvegicus-Rnor_6.0-dbSNP149.genometemplate\sequences\NC_005103_chr4.gbk#0	184226339	NC_005103.4	+	313343	30807755..31121097	29564, 2512		Dync1i1	Dnci1, Dncic1
Slc25a13	1.694	2.382	0.45	2.477	1.40649	0.961892	0.181771	0.683894	Z-009083	Slc25a13	gene		D:\assemblies\Rattus_norvegicus-Rnor_6.0-dbSNP149\Rattus_norvegicus-Rnor_6.0-dbSNP149.genometemplate\sequences\NC_005103_chr4.gbk#0	184226339	NC_005103.4	-	622842	31757006..31134165	362322, 1565889		Slc25a13
Samd9l	1.248	2.107	20.762	1.525	1.68877	1.38161	13.6139	0.818113	Z-009085	Samd9l	gene		D:\assemblies\Rattus_norvegicus-Rnor_6.0-dbSNP149\Rattus_norvegicus-Rnor_6.0-dbSNP149.genometemplate\sequences\NC_005103_chr4.gbk#0	184226339	NC_005103.4	+	4269	31295156..31299424	500015, 1562531		Samd9l
LOC100912034	70.959	164.543	11.339	83.462	2.31884	1.97146	0.135858	0.850194	Z-009087	LOC100912034	gene		D:\assemblies\Rattus_norvegicus-Rnor_6.0-dbSNP149\Rattus_norvegicus-Rnor_6.0-dbSNP149.genometemplate\sequences\NC_005103_chr4.gbk#0	184226339	NC_005103.4	+	5530	31387262..31392791	100912034, 6489513		LOC100912034
Shfm1	71.475	214.876	420.533	95.34	3.00629	2.25378	4.41088	0.749688	Z-009091	Shfm1	gene		D:\assemblies\Rattus_norvegicus-Rnor_6.0-dbSNP149\Rattus_norvegicus-Rnor_6.0-dbSNP149.genometemplate\sequences\NC_005103_chr4.gbk#0	184226339	NC_005103.4	-	20157	32087600..32067444	680532, 1590628		Shfm1	Dss1
Dlx6	0.658	1.332	0.001	1.699	2.02489	0.783949	0.000556338	0.387155	Z-009093	Dlx6	gene		D:\assemblies\Rattus_norvegicus-Rnor_6.0-dbSNP149\Rattus_norvegicus-Rnor_6.0-dbSNP149.genometemplate\sequences\NC_005103_chr4.gbk#0	184226339	NC_005103.4	+	4293	32373096..32377388	500023, 1561539		Dlx6
LOC500035	0.062	0.012	0.875	0.001	0.200591	13.1064	925.545	65.3392	Z-009127	LOC500035	gene		D:\assemblies\Rattus_norvegicus-Rnor_6.0-dbSNP149\Rattus_norvegicus-Rnor_6.0-dbSNP149.genometemplate\sequences\NC_005103_chr4.gbk#0	184226339	NC_005103.4	+	8280	40161285..40169564	500035, 1564656		LOC500035
Foxp2	0.121	0.049	0.001	0.237	0.408165	0.208578	0.00398948	0.511015	Z-009131	Foxp2	gene		D:\assemblies\Rattus_norvegicus-Rnor_6.0-dbSNP149\Rattus_norvegicus-Rnor_6.0-dbSNP149.genometemplate\sequences\NC_005103_chr4.gbk#0	184226339	NC_005103.4	+	580245	41364441..41944685	500037, 1559697		Foxp2	RGD1559697
LOC102551271	0.012	0.005	0.117	0.001	0.38415	4.85359	123.769	12.6346	Z-009147	LOC102551271	gene		D:\assemblies\Rattus_norvegicus-Rnor_6.0-dbSNP149\Rattus_norvegicus-Rnor_6.0-dbSNP149.genometemplate\sequences\NC_005103_chr4.gbk#0	184226339	NC_005103.4	-	27902	44936075..44908174	102551271, 7696844		LOC102551271
Tspan12	14.618	25.688	0.894	15.292	1.75734	1.67981	0.0584318	0.955883	Z-009160	Tspan12	gene		D:\assemblies\Rattus_norvegicus-Rnor_6.0-dbSNP149\Rattus_norvegicus-Rnor_6.0-dbSNP149.genometemplate\sequences\NC_005103_chr4.gbk#0	184226339	NC_005103.4	-	100418	48953240..48852823	362326, 1311102		Tspan12	Tm4sf12
Asb15	0.049	0.575	0.001	0.259	11.6814	2.2185	0.00364611	0.189917	Z-009181	Asb15	gene		D:\assemblies\Rattus_norvegicus-Rnor_6.0-dbSNP149\Rattus_norvegicus-Rnor_6.0-dbSNP149.genometemplate\sequences\NC_005103_chr4.gbk#0	184226339	NC_005103.4	+	43462	51598815..51642276	500050, 727860		Asb15
Grm8	0.001	0.001	0.038	0.001	1	1	40.7244	1	Z-009193	Grm8	gene		D:\assemblies\Rattus_norvegicus-Rnor_6.0-dbSNP149\Rattus_norvegicus-Rnor_6.0-dbSNP149.genometemplate\sequences\NC_005103_chr4.gbk#0	184226339	NC_005103.4	-	935183	55409526..54474344	60590, 619858		Grm8	Glur8, Gprc1h, mGlur, Mglur8, mGluR8b
Gcc1	1.579	3.147	0.673	2.736	1.99267	1.15025	0.245852	0.57724	Z-009196	Gcc1	gene		D:\assemblies\Rattus_norvegicus-Rnor_6.0-dbSNP149\Rattus_norvegicus-Rnor_6.0-dbSNP149.genometemplate\sequences\NC_005103_chr4.gbk#0	184226339	NC_005103.4	-	11845	55719884..55708040	100361513, 2319954		Gcc1
Lipogenin	0.001	0.008	0.7	0.001	8.69693	8.69693	740.579	1	Z-009201	Lipogenin	gene		D:\assemblies\Rattus_norvegicus-Rnor_6.0-dbSNP149\Rattus_norvegicus-Rnor_6.0-dbSNP149.genometemplate\sequences\NC_005103_chr4.gbk#0	184226339	NC_005103.4	+	1256	56033448..56034703	252964, 628724		Lipogenin
Fam71f2	0.293	1.955	0.001	0.342	6.66993	5.72344	0.00276692	0.858095	Z-009211	Fam71f2	gene		D:\assemblies\Rattus_norvegicus-Rnor_6.0-dbSNP149\Rattus_norvegicus-Rnor_6.0-dbSNP149.genometemplate\sequences\NC_005103_chr4.gbk#0	184226339	NC_005103.4	+	10806	56556545..56567350	500060, 1561814		Fam71f2	Tdrns18l2
LOC103692085	2.128	4.294	0.001	1.427	2.01815	3.00983	0.00066245	1.49138	Z-009212	LOC103692085	gene		D:\assemblies\Rattus_norvegicus-Rnor_6.0-dbSNP149\Rattus_norvegicus-Rnor_6.0-dbSNP149.genometemplate\sequences\NC_005103_chr4.gbk#0	184226339	NC_005103.4	-	440	56563102..56562663	103692085, 9389926		LOC103692085
Tspan33	5.21	16.651	0.615	7.305	3.1962	2.27953	0.0842241	0.7132	Z-009224	Tspan33	gene		D:\assemblies\Rattus_norvegicus-Rnor_6.0-dbSNP149\Rattus_norvegicus-Rnor_6.0-dbSNP149.genometemplate\sequences\NC_005103_chr4.gbk#0	184226339	NC_005103.4	+	24584	56981283..57005866	500065, 1560915		Tspan33	RGD1560915
LOC102553416	0.031	0.007	0.001	0.16	0.223816	0.0427176	0.00591274	0.19086	Z-009245	LOC102553416	gene		D:\assemblies\Rattus_norvegicus-Rnor_6.0-dbSNP149\Rattus_norvegicus-Rnor_6.0-dbSNP149.genometemplate\sequences\NC_005103_chr4.gbk#0	184226339	NC_005103.4	-	12438	57925235..57912798	102553416, 7689603		LOC102553416
Mest	2.932	3.045	0.191	2.344	1.03828	1.29884	0.0812814	1.25095	Z-009249	Mest	gene		D:\assemblies\Rattus_norvegicus-Rnor_6.0-dbSNP149\Rattus_norvegicus-Rnor_6.0-dbSNP149.genometemplate\sequences\NC_005103_chr4.gbk#0	184226339	NC_005103.4	+	10442	58052786..58063227	58827, 1594589		Mest
LOC103692111	0.007	0.001	0.247	0.001	0.144941	1	261.739	6.89935	Z-009258	LOC103692111	gene		D:\assemblies\Rattus_norvegicus-Rnor_6.0-dbSNP149\Rattus_norvegicus-Rnor_6.0-dbSNP149.genometemplate\sequences\NC_005103_chr4.gbk#0	184226339	NC_005103.4	-	34625	58504056..58469432	103692111, 9408229		LOC103692111
Cald1	42.123	54.23	3.79	51.97	1.28741	1.04348	0.0729324	0.810529	Z-009288	Cald1	gene		D:\assemblies\Rattus_norvegicus-Rnor_6.0-dbSNP149\Rattus_norvegicus-Rnor_6.0-dbSNP149.genometemplate\sequences\NC_005103_chr4.gbk#0	184226339	NC_005103.4	+	187428	62103948..62291375	25687, 2256		Cald1	l-Cad
LOC108350691	42.717	90.673	12.814	55.965	2.12262	1.62016	0.228963	0.763283	Z-009289	LOC108350691	gene		D:\assemblies\Rattus_norvegicus-Rnor_6.0-dbSNP149\Rattus_norvegicus-Rnor_6.0-dbSNP149.genometemplate\sequences\NC_005103_chr4.gbk#0	184226339	NC_005103.4	-	2725	62293099..62290375	108350691		LOC108350691
LOC689574	128.953	335.519	12.261	142.044	2.60186	2.36207	0.0863205	0.907839	Z-009300	LOC689574	gene		D:\assemblies\Rattus_norvegicus-Rnor_6.0-dbSNP149\Rattus_norvegicus-Rnor_6.0-dbSNP149.genometemplate\sequences\NC_005103_chr4.gbk#0	184226339	NC_005103.4	+	9833	62780596..62790428	689574, 1591053		LOC689574
Slc13a4	0.261	0.471	0.001	0.12	1.80168	3.91187	0.00785764	2.17124	Z-009301	Slc13a4	gene		D:\assemblies\Rattus_norvegicus-Rnor_6.0-dbSNP149\Rattus_norvegicus-Rnor_6.0-dbSNP149.genometemplate\sequences\NC_005103_chr4.gbk#0	184226339	NC_005103.4	-	44322	62841053..62796732	503568, 1359715		Slc13a4
Mkrn1	63.456	133.246	10.235	69.574	2.0998	1.91517	0.147106	0.912071	Z-009335	Mkrn1	gene		D:\assemblies\Rattus_norvegicus-Rnor_6.0-dbSNP149\Rattus_norvegicus-Rnor_6.0-dbSNP149.genometemplate\sequences\NC_005103_chr4.gbk#0	184226339	NC_005103.4	-	21312	67206478..67185167	296988, 1303251		Mkrn1
Dennd2a	2.075	4.233	0.321	3.35	2.03999	1.26382	0.0958445	0.619523	Z-009336	Dennd2a	gene		D:\assemblies\Rattus_norvegicus-Rnor_6.0-dbSNP149\Rattus_norvegicus-Rnor_6.0-dbSNP149.genometemplate\sequences\NC_005103_chr4.gbk#0	184226339	NC_005103.4	-	100737	67342993..67242257	312257, 1306142		Dennd2a
Adck2	0.415	0.568	2.102	0.336	1.36907	1.69144	6.255	1.23547	Z-009337	Adck2	gene		D:\assemblies\Rattus_norvegicus-Rnor_6.0-dbSNP149\Rattus_norvegicus-Rnor_6.0-dbSNP149.genometemplate\sequences\NC_005103_chr4.gbk#0	184226339	NC_005103.4	+	13860	67359531..67373390	312258, 1311058		Adck2
LOC102554668	0.008	1.009	3.04	0.221	132.985	4.5647	13.7504	0.034325	Z-009338	LOC102554668	gene		D:\assemblies\Rattus_norvegicus-Rnor_6.0-dbSNP149\Rattus_norvegicus-Rnor_6.0-dbSNP149.genometemplate\sequences\NC_005103_chr4.gbk#0	184226339	NC_005103.4	-	1229	67378101..67376873	102554668, 7626918		LOC102554668
LOC108350697	0.001	0.001	0.566	0.001	1	1	598.684	1	Z-009350	LOC108350697	gene		D:\assemblies\Rattus_norvegicus-Rnor_6.0-dbSNP149\Rattus_norvegicus-Rnor_6.0-dbSNP149.genometemplate\sequences\NC_005103_chr4.gbk#0	184226339	NC_005103.4	+	3332	68578432..68581763	108350697		LOC108350697
Ssbp1	6.57	6.208	69.701	7.947	0.944872	0.781188	8.77106	0.826767	Z-009352	Ssbp1	gene		D:\assemblies\Rattus_norvegicus-Rnor_6.0-dbSNP149\Rattus_norvegicus-Rnor_6.0-dbSNP149.genometemplate\sequences\NC_005103_chr4.gbk#0	184226339	NC_005103.4	+	10269	68634844..68645112	54304, 3760		Ssbp1	Mt-SSB, mtSSB, Ssbp
Clec5a	1.998	5.838	0.001	1.392	2.92127	4.19459	0.000679097	1.43588	Z-009356	Clec5a	gene		D:\assemblies\Rattus_norvegicus-Rnor_6.0-dbSNP149\Rattus_norvegicus-Rnor_6.0-dbSNP149.genometemplate\sequences\NC_005103_chr4.gbk#0	184226339	NC_005103.4	-	9592	68819921..68810330	679787, 1584755		Clec5a
LOC102550783	0.001	0.001	2.954	0.001	1	1	3125.44	1	Z-009361	LOC102550783	gene		D:\assemblies\Rattus_norvegicus-Rnor_6.0-dbSNP149\Rattus_norvegicus-Rnor_6.0-dbSNP149.genometemplate\sequences\NC_005103_chr4.gbk#0	184226339	NC_005103.4	+	1134	69138276..69139409	102550783		LOC102550783
Tryx5	0.001	0.001	0.272	0.001	1	1	288.117	1	Z-009363	Tryx5	gene		D:\assemblies\Rattus_norvegicus-Rnor_6.0-dbSNP149\Rattus_norvegicus-Rnor_6.0-dbSNP149.genometemplate\sequences\NC_005103_chr4.gbk#0	184226339	NC_005103.4	-	8638	69164906..69156269	408205, 1302947		Tryx5
LOC312273	0.001	0.001	2.364	0.001	1	1	2501.53	1	Z-009364	LOC312273	gene		D:\assemblies\Rattus_norvegicus-Rnor_6.0-dbSNP149\Rattus_norvegicus-Rnor_6.0-dbSNP149.genometemplate\sequences\NC_005103_chr4.gbk#0	184226339	NC_005103.4	-	5946	69196430..69190485	312273, 1563848		LOC312273	Tryx4
LOC286960	0.001	0.001	0.22	0.001	1	1	233.249	1	Z-009365	LOC286960	gene		D:\assemblies\Rattus_norvegicus-Rnor_6.0-dbSNP149\Rattus_norvegicus-Rnor_6.0-dbSNP149.genometemplate\sequences\NC_005103_chr4.gbk#0	184226339	NC_005103.4	-	3745	69211671..69207927	286960, 708585		LOC286960	Try4
LOC100910843	0.001	0.006	0.137	0.001	6.60644	6.60644	145.213	1	Z-009366	LOC100910843	gene		D:\assemblies\Rattus_norvegicus-Rnor_6.0-dbSNP149\Rattus_norvegicus-Rnor_6.0-dbSNP149.genometemplate\sequences\NC_005103_chr4.gbk#0	184226339	NC_005103.4	+	2271	69249070..69251340	100910843, 6496223		LOC100910843
Prss3	0.001	0.001	1.29	0.001	1	1	1365.17	1	Z-009367	Prss3	gene		D:\assemblies\Rattus_norvegicus-Rnor_6.0-dbSNP149\Rattus_norvegicus-Rnor_6.0-dbSNP149.genometemplate\sequences\NC_005103_chr4.gbk#0	184226339	NC_005103.4	-	3709	69268336..69264628	286911, 708437		Prss3	Try3
LOC102550134	0.001	0.001	3.851	0.001	1	1	4074.5	1	Z-009368	LOC102550134	gene		D:\assemblies\Rattus_norvegicus-Rnor_6.0-dbSNP149\Rattus_norvegicus-Rnor_6.0-dbSNP149.genometemplate\sequences\NC_005103_chr4.gbk#0	184226339	NC_005103.4	+	2122	69285320..69287441	102550134		LOC102550134
LOC100911086	0.001	0.006	2.583	0.001	6.4047	6.4047	2732.75	1	Z-009370	LOC100911086	gene		D:\assemblies\Rattus_norvegicus-Rnor_6.0-dbSNP149\Rattus_norvegicus-Rnor_6.0-dbSNP149.genometemplate\sequences\NC_005103_chr4.gbk#0	184226339	NC_005103.4	+	9151	69383223..69392373	100911086, 6494965		LOC100911086
LOC108350806	0.001	0.001	7.953	0.001	1	1	8414.9	1	Z-009371	LOC108350806	gene		D:\assemblies\Rattus_norvegicus-Rnor_6.0-dbSNP149\Rattus_norvegicus-Rnor_6.0-dbSNP149.genometemplate\sequences\NC_005103_chr4.gbk#0	184226339	NC_005103.4	+	390	69403845..69404234	108350806		LOC108350806
LOC102547329	0.001	0.001	1.937	0.001	1	1	2049.32	1	Z-009372	LOC102547329	gene		D:\assemblies\Rattus_norvegicus-Rnor_6.0-dbSNP149\Rattus_norvegicus-Rnor_6.0-dbSNP149.genometemplate\sequences\NC_005103_chr4.gbk#0	184226339	NC_005103.4	+	4415	69417070..69421484	102547329		LOC102547329
LOC102551068	0.001	0.001	0.809	0.001	1	1	855.913	1	Z-009373	LOC102551068	gene		D:\assemblies\Rattus_norvegicus-Rnor_6.0-dbSNP149\Rattus_norvegicus-Rnor_6.0-dbSNP149.genometemplate\sequences\NC_005103_chr4.gbk#0	184226339	NC_005103.4	+	3677	69421736..69425412	102551068		LOC102551068
LOC100911317	0.001	0.007	0.971	0.001	7.76576	7.76576	1026.95	1	Z-009376	LOC100911317	gene		D:\assemblies\Rattus_norvegicus-Rnor_6.0-dbSNP149\Rattus_norvegicus-Rnor_6.0-dbSNP149.genometemplate\sequences\NC_005103_chr4.gbk#0	184226339	NC_005103.4	+	775	69444126..69444900	100911317, 6493361		LOC100911317
LOC102551370	0.001	0.001	2.581	0.001	1	1	2731.16	1	Z-009377	LOC102551370	gene		D:\assemblies\Rattus_norvegicus-Rnor_6.0-dbSNP149\Rattus_norvegicus-Rnor_6.0-dbSNP149.genometemplate\sequences\NC_005103_chr4.gbk#0	184226339	NC_005103.4	+	1134	69456816..69457949	102551370		LOC102551370
LOC103692104	0.001	0.001	1.153	0.001	1	1	1219.44	1	Z-009378	LOC103692104	gene		D:\assemblies\Rattus_norvegicus-Rnor_6.0-dbSNP149\Rattus_norvegicus-Rnor_6.0-dbSNP149.genometemplate\sequences\NC_005103_chr4.gbk#0	184226339	NC_005103.4	+	777	69468102..69468878	103692104		LOC103692104
LOC102551470	0.001	0.001	2.142	0.001	1	1	2266.04	1	Z-009379	LOC102551470	gene		D:\assemblies\Rattus_norvegicus-Rnor_6.0-dbSNP149\Rattus_norvegicus-Rnor_6.0-dbSNP149.genometemplate\sequences\NC_005103_chr4.gbk#0	184226339	NC_005103.4	+	774	69477406..69478179	102551470		LOC102551470
LOC102551554	0.001	0.001	0.992	0.001	1	1	1049.68	1	Z-009380	LOC102551554	gene		D:\assemblies\Rattus_norvegicus-Rnor_6.0-dbSNP149\Rattus_norvegicus-Rnor_6.0-dbSNP149.genometemplate\sequences\NC_005103_chr4.gbk#0	184226339	NC_005103.4	+	2348	69493373..69495720	102551554		LOC102551554
LOC102551645	0.001	0.103	0.521	0.001	108.513	108.513	551.467	1	Z-009381	LOC102551645	gene		D:\assemblies\Rattus_norvegicus-Rnor_6.0-dbSNP149\Rattus_norvegicus-Rnor_6.0-dbSNP149.genometemplate\sequences\NC_005103_chr4.gbk#0	184226339	NC_005103.4	+	2261	69496779..69499039	102551645		LOC102551645
LOC102551734	0.001	0.001	0.661	0.001	1	1	699.529	1	Z-009382	LOC102551734	gene		D:\assemblies\Rattus_norvegicus-Rnor_6.0-dbSNP149\Rattus_norvegicus-Rnor_6.0-dbSNP149.genometemplate\sequences\NC_005103_chr4.gbk#0	184226339	NC_005103.4	+	1386	69498500..69499885	102551734		LOC102551734
LOC108348060	0.001	0.001	137.005	0.001	1	1	144959	1	Z-009387	LOC108348060	gene		D:\assemblies\Rattus_norvegicus-Rnor_6.0-dbSNP149\Rattus_norvegicus-Rnor_6.0-dbSNP149.genometemplate\sequences\NC_005103_chr4.gbk#0	184226339	NC_005103.4	+	243797	70578022..70821818	108348060		LOC108348060
LOC102554731	0.06	3.573	472.162	0.738	59.0547	4.83861	639.461	0.0819344	Z-009395	LOC102554731	gene		D:\assemblies\Rattus_norvegicus-Rnor_6.0-dbSNP149\Rattus_norvegicus-Rnor_6.0-dbSNP149.genometemplate\sequences\NC_005103_chr4.gbk#0	184226339	NC_005103.4	+	4820	70825695..70830514	102554731		LOC102554731
Arhgef5	0.294	0.152	0.077	1.142	0.515781	0.132753	0.0670844	0.257383	Z-009446	Arhgef5	gene		D:\assemblies\Rattus_norvegicus-Rnor_6.0-dbSNP149\Rattus_norvegicus-Rnor_6.0-dbSNP149.genometemplate\sequences\NC_005103_chr4.gbk#0	184226339	NC_005103.4	+	25641	72710775..72736415	140898, 620718		Arhgef5
Pdia4	3.456	4.929	22.393	2.98	1.42627	1.65381	7.51378	1.15954	Z-009464	Pdia4	gene		D:\assemblies\Rattus_norvegicus-Rnor_6.0-dbSNP149\Rattus_norvegicus-Rnor_6.0-dbSNP149.genometemplate\sequences\NC_005103_chr4.gbk#0	184226339	NC_005103.4	-	18900	77489535..77470636	116598, 619835		Pdia4	ERp-72, Erp70, Erp72
Zfp282	0.729	0.786	0.176	1.492	1.07781	0.526622	0.117684	0.488605	Z-009467	Zfp282	gene		D:\assemblies\Rattus_norvegicus-Rnor_6.0-dbSNP149\Rattus_norvegicus-Rnor_6.0-dbSNP149.genometemplate\sequences\NC_005103_chr4.gbk#0	184226339	NC_005103.4	+	26446	77554269..77580714	297065, 1306278		Zfp282	Znf282
Zfp212	2.935	2.527	0.594	2.749	0.86082	0.919159	0.215991	1.06777	Z-009468	Zfp212	gene		D:\assemblies\Rattus_norvegicus-Rnor_6.0-dbSNP149\Rattus_norvegicus-Rnor_6.0-dbSNP149.genometemplate\sequences\NC_005103_chr4.gbk#0	184226339	NC_005103.4	+	12428	77591880..77604307	297066, 1307836		Zfp212
Krba1	0.286	0.104	3.459	0.472	0.364917	0.220755	7.32522	0.604945	Z-009512	Krba1	gene		D:\assemblies\Rattus_norvegicus-Rnor_6.0-dbSNP149\Rattus_norvegicus-Rnor_6.0-dbSNP149.genometemplate\sequences\NC_005103_chr4.gbk#0	184226339	NC_005103.4	+	21464	78024867..78046330	362358, 1306967		Krba1
Gimap4	6.733	8.641	58.125	8.419	1.28349	1.02646	6.90431	0.799737	Z-009523	Gimap4	gene		D:\assemblies\Rattus_norvegicus-Rnor_6.0-dbSNP149\Rattus_norvegicus-Rnor_6.0-dbSNP149.genometemplate\sequences\NC_005103_chr4.gbk#0	184226339	NC_005103.4	+	6915	78320230..78327144	286938, 628765		Gimap4	Ian1
Gimap7	2.29	0.227	250.859	2.233	0.0991515	0.101694	112.337	1.02564	Z-009525	Gimap7	gene		D:\assemblies\Rattus_norvegicus-Rnor_6.0-dbSNP149\Rattus_norvegicus-Rnor_6.0-dbSNP149.genometemplate\sequences\NC_005103_chr4.gbk#0	184226339	NC_005103.4	+	4171	78354335..78358505	500113, 1565750		Gimap7	Ian3
Gimap1	2.883	9.269	26.522	4.489	3.21457	2.06469	5.90801	0.642291	Z-009526	Gimap1	gene		D:\assemblies\Rattus_norvegicus-Rnor_6.0-dbSNP149\Rattus_norvegicus-Rnor_6.0-dbSNP149.genometemplate\sequences\NC_005103_chr4.gbk#0	184226339	NC_005103.4	+	10175	78365276..78375450	312312, 1306777		Gimap1	Ian2, Imap38
Gimap5	7.646	0.624	76.301	8.384	0.0816437	0.0744579	9.10063	0.911986	Z-009527	Gimap5	gene		D:\assemblies\Rattus_norvegicus-Rnor_6.0-dbSNP149\Rattus_norvegicus-Rnor_6.0-dbSNP149.genometemplate\sequences\NC_005103_chr4.gbk#0	184226339	NC_005103.4	+	9456	78377228..78386683	246774, 628871		Gimap5	IAN4, Ian4l1, Ian5, lyp
Malsu1	1.279	8.136	25.962	4.031	6.36025	2.01859	6.44113	0.317376	Z-009538	Malsu1	gene		D:\assemblies\Rattus_norvegicus-Rnor_6.0-dbSNP149\Rattus_norvegicus-Rnor_6.0-dbSNP149.genometemplate\sequences\NC_005103_chr4.gbk#0	184226339	NC_005103.4	+	8824	78735279..78744102	297082, 1306936		Malsu1	RGD1306936
Hoxa4	0.038	0.005	0.001	0.471	0.140566	0.0114319	0.00200508	0.0813279	Z-009581	Hoxa4	gene		D:\assemblies\Rattus_norvegicus-Rnor_6.0-dbSNP149\Rattus_norvegicus-Rnor_6.0-dbSNP149.genometemplate\sequences\NC_005103_chr4.gbk#0	184226339	NC_005103.4	-	2084	82160317..82158234	100912525, 2814		Hoxa4
LOC100912608	3.58	3.31	0.126	4.742	0.924569	0.697921	0.0264883	0.754861	Z-009589	LOC100912608	gene		D:\assemblies\Rattus_norvegicus-Rnor_6.0-dbSNP149\Rattus_norvegicus-Rnor_6.0-dbSNP149.genometemplate\sequences\NC_005103_chr4.gbk#0	184226339	NC_005103.4	-	10224	82210368..82200145	100912608, 6485971		LOC100912608
Hoxa10	2.656	2.597	0.107	3.934	0.977704	0.660061	0.0272895	0.675113	Z-009597	Hoxa10	gene		D:\assemblies\Rattus_norvegicus-Rnor_6.0-dbSNP149\Rattus_norvegicus-Rnor_6.0-dbSNP149.genometemplate\sequences\NC_005103_chr4.gbk#0	184226339	NC_005103.4	-	9953	82295892..82285940	103692129, 9410935		Hoxa10
LOC108350714	0.001	0.005	0.026	0.001	5.09306	5.09306	27.363	1	Z-009616	LOC108350714	gene		D:\assemblies\Rattus_norvegicus-Rnor_6.0-dbSNP149\Rattus_norvegicus-Rnor_6.0-dbSNP149.genometemplate\sequences\NC_005103_chr4.gbk#0	184226339	NC_005103.4	-	12656	84314671..84302016	108350714		LOC108350714
LOC103692134	0.006	5.499	5.333	0.428	985.925	12.8354	12.4483	0.0130186	Z-009622	LOC103692134	gene		D:\assemblies\Rattus_norvegicus-Rnor_6.0-dbSNP149\Rattus_norvegicus-Rnor_6.0-dbSNP149.genometemplate\sequences\NC_005103_chr4.gbk#0	184226339	NC_005103.4	-	6419	84656807..84650389	103692134, 9219980		LOC103692134
Aqp1	27.141	43.945	1.49	32.055	1.61915	1.37094	0.0464803	0.846704	Z-009640	Aqp1	gene		D:\assemblies\Rattus_norvegicus-Rnor_6.0-dbSNP149\Rattus_norvegicus-Rnor_6.0-dbSNP149.genometemplate\sequences\NC_005103_chr4.gbk#0	184226339	NC_005103.4	+	12181	85551503..85563683	25240, 2141		Aqp1	CHIP28
Lsm5	18.957	38.751	150.967	26.655	2.04418	1.45382	5.6638	0.711197	Z-009649	Lsm5	gene		D:\assemblies\Rattus_norvegicus-Rnor_6.0-dbSNP149\Rattus_norvegicus-Rnor_6.0-dbSNP149.genometemplate\sequences\NC_005103_chr4.gbk#0	184226339	NC_005103.4	-	3217	87019219..87016003	306222, 1308655		Lsm5
Herc6	0.306	0.783	1.962	0.405	2.56325	1.93221	4.841	0.753812	Z-009681	Herc6	gene		D:\assemblies\Rattus_norvegicus-Rnor_6.0-dbSNP149\Rattus_norvegicus-Rnor_6.0-dbSNP149.genometemplate\sequences\NC_005103_chr4.gbk#0	184226339	NC_005103.4	-	42574	88649424..88606851	362376, 1561739		Herc6
Nap1l5	0.006	0.01	0.467	0.001	1.7468	10.3377	493.6	5.91809	Z-009685	Nap1l5	gene		D:\assemblies\Rattus_norvegicus-Rnor_6.0-dbSNP149\Rattus_norvegicus-Rnor_6.0-dbSNP149.genometemplate\sequences\NC_005103_chr4.gbk#0	184226339	NC_005103.4	-	3198	89152511..89149314	688843, 1584123		Nap1l5
Snca	6.801	14.143	0.001	8.977	2.07969	1.57547	0.000105281	0.757552	Z-009694	Snca	gene		D:\assemblies\Rattus_norvegicus-Rnor_6.0-dbSNP149\Rattus_norvegicus-Rnor_6.0-dbSNP149.genometemplate\sequences\NC_005103_chr4.gbk#0	184226339	NC_005103.4	-	100825	90883236..90782412	29219, 3729		Snca
LOC102552449	0.034	0.001	0.389	0.001	0.0274955	1	411.616	36.3696	Z-009706	LOC102552449	gene		D:\assemblies\Rattus_norvegicus-Rnor_6.0-dbSNP149\Rattus_norvegicus-Rnor_6.0-dbSNP149.genometemplate\sequences\NC_005103_chr4.gbk#0	184226339	NC_005103.4	+	518	93808023..93808540	102552449		LOC102552449
Tnip3	0.041	0.01	0.379	0.001	0.236283	10.3401	400.861	43.7615	Z-009715	Tnip3	gene		D:\assemblies\Rattus_norvegicus-Rnor_6.0-dbSNP149\Rattus_norvegicus-Rnor_6.0-dbSNP149.genometemplate\sequences\NC_005103_chr4.gbk#0	184226339	NC_005103.4	+	104311	96386207..96490517	689756, 1588732		Tnip3
Gadd45a	24.4	59.472	5.604	26.881	2.43742	2.21242	0.208484	0.907689	Z-009724	Gadd45a	gene		D:\assemblies\Rattus_norvegicus-Rnor_6.0-dbSNP149\Rattus_norvegicus-Rnor_6.0-dbSNP149.genometemplate\sequences\NC_005103_chr4.gbk#0	184226339	NC_005103.4	-	2303	97784814..97782512	25112, 2654		Gadd45a	Ddit1, Gadd45
Il23r	0.001	0.001	0.085	0.001	1	1	89.8633	1	Z-009728	Il23r	gene		D:\assemblies\Rattus_norvegicus-Rnor_6.0-dbSNP149\Rattus_norvegicus-Rnor_6.0-dbSNP149.genometemplate\sequences\NC_005103_chr4.gbk#0	184226339	NC_005103.4	-	102942	98306729..98203788	689932, 1586368		Il23r
RGD1564861	60.071	110.702	2005.95	60.52	1.84286	1.82919	33.1455	0.992582	Z-009732	RGD1564861	gene		D:\assemblies\Rattus_norvegicus-Rnor_6.0-dbSNP149\Rattus_norvegicus-Rnor_6.0-dbSNP149.genometemplate\sequences\NC_005103_chr4.gbk#0	184226339	NC_005103.4	+	42262	98481213..98523474	502844, 1564861		RGD1564861
Rpia	20.422	44.257	5.821	27.992	2.16711	1.58105	0.207943	0.729566	Z-009734	Rpia	gene		D:\assemblies\Rattus_norvegicus-Rnor_6.0-dbSNP149\Rattus_norvegicus-Rnor_6.0-dbSNP149.genometemplate\sequences\NC_005103_chr4.gbk#0	184226339	NC_005103.4	-	25637	98593664..98568028	362383, 1311377		Rpia
LOC102549525	0.041	0.007	0.445	0.001	0.174122	7.61932	471.01	43.7584	Z-009735	LOC102549525	gene		D:\assemblies\Rattus_norvegicus-Rnor_6.0-dbSNP149\Rattus_norvegicus-Rnor_6.0-dbSNP149.genometemplate\sequences\NC_005103_chr4.gbk#0	184226339	NC_005103.4	-	2569	98648396..98645828	102549525, 7583063		LOC102549525
Fabp1	0.001	0.001	1.225	0.001	1	1	1296.05	1	Z-009740	Fabp1	gene		D:\assemblies\Rattus_norvegicus-Rnor_6.0-dbSNP149\Rattus_norvegicus-Rnor_6.0-dbSNP149.genometemplate\sequences\NC_005103_chr4.gbk#0	184226339	NC_005103.4	+	3777	99063181..99066957	24360, 2590		Fabp1	Fabplg, L-FABP, p14, SCP, SCP.
LOC108350717	0.005	0.005	1.176	0.001	1.14371	5.46176	1244.61	4.77547	Z-009746	LOC108350717	gene		D:\assemblies\Rattus_norvegicus-Rnor_6.0-dbSNP149\Rattus_norvegicus-Rnor_6.0-dbSNP149.genometemplate\sequences\NC_005103_chr4.gbk#0	184226339	NC_005103.4	+	2028	99215431..99217458	108350717		LOC108350717
Ptcd3	4.265	7.032	31.012	4.602	1.64887	1.52828	6.73961	0.926868	Z-009755	Ptcd3	gene		D:\assemblies\Rattus_norvegicus-Rnor_6.0-dbSNP149\Rattus_norvegicus-Rnor_6.0-dbSNP149.genometemplate\sequences\NC_005103_chr4.gbk#0	184226339	NC_005103.4	-	27315	99822960..99795646	500199, 1565582		Ptcd3
St3gal5	24.681	53.584	5.088	32.872	2.17101	1.63009	0.154781	0.750844	Z-009758	St3gal5	gene		D:\assemblies\Rattus_norvegicus-Rnor_6.0-dbSNP149\Rattus_norvegicus-Rnor_6.0-dbSNP149.genometemplate\sequences\NC_005103_chr4.gbk#0	184226339	NC_005103.4	+	62407	99937499..99999905	83505, 620875		St3gal5	Siat9
Tcf7l1	6.672	9.256	0.851	9.132	1.38728	1.01362	0.0932402	0.730655	Z-009777	Tcf7l1	gene		D:\assemblies\Rattus_norvegicus-Rnor_6.0-dbSNP149\Rattus_norvegicus-Rnor_6.0-dbSNP149.genometemplate\sequences\NC_005103_chr4.gbk#0	184226339	NC_005103.4	-	167606	100660401..100492796	312451, 1311671		Tcf7l1	Tcf3
Tmsb10	349.425	832.246	3999.55	420.536	2.38176	1.97901	9.51059	0.830903	Z-009781	Tmsb10	gene		D:\assemblies\Rattus_norvegicus-Rnor_6.0-dbSNP149\Rattus_norvegicus-Rnor_6.0-dbSNP149.genometemplate\sequences\NC_005103_chr4.gbk#0	184226339	NC_005103.4	-	1088	100883303..100882216	50665, 62022		Tmsb10	Ptmb10, THYb10
LOC102550611	0.007	0.001	0.644	0.001	0.12967	1	681.625	7.71187	Z-009787	LOC102550611	gene		D:\assemblies\Rattus_norvegicus-Rnor_6.0-dbSNP149\Rattus_norvegicus-Rnor_6.0-dbSNP149.genometemplate\sequences\NC_005103_chr4.gbk#0	184226339	NC_005103.4	+	829	101639629..101640457	102550611		LOC102550611
LOC103692157	0.001	0.007	0.916	0.001	6.94848	6.94848	969.6	1	Z-009790	LOC103692157	gene		D:\assemblies\Rattus_norvegicus-Rnor_6.0-dbSNP149\Rattus_norvegicus-Rnor_6.0-dbSNP149.genometemplate\sequences\NC_005103_chr4.gbk#0	184226339	NC_005103.4	+	3354	101734946..101738299	103692157		LOC103692157
LOC500159	0.497	0.001	1.427	0.001	0.0019034	1	1509.48	525.377	Z-009792	LOC500159	gene		D:\assemblies\Rattus_norvegicus-Rnor_6.0-dbSNP149\Rattus_norvegicus-Rnor_6.0-dbSNP149.genometemplate\sequences\NC_005103_chr4.gbk#0	184226339	NC_005103.4	+	537	101882953..101883489	500159		LOC500159
LOC108350865	0.001	0.001	0.289	0.001	1	1	305.835	1	Z-009808	LOC108350865	gene		D:\assemblies\Rattus_norvegicus-Rnor_6.0-dbSNP149\Rattus_norvegicus-Rnor_6.0-dbSNP149.genometemplate\sequences\NC_005103_chr4.gbk#0	184226339	NC_005103.4	+	1216	102665485..102666700	108350865		LOC108350865
LOC102552245	0.034	0.001	0.389	0.001	0.0274955	1	411.616	36.3696	Z-009810	LOC102552245	gene		D:\assemblies\Rattus_norvegicus-Rnor_6.0-dbSNP149\Rattus_norvegicus-Rnor_6.0-dbSNP149.genometemplate\sequences\NC_005103_chr4.gbk#0	184226339	NC_005103.4	+	518	102804921..102805438	102552245		LOC102552245
LOC690215	0.685	4.383	13.975	1.192	6.39958	3.67616	11.7205	0.574437	Z-009813	LOC690215	gene		D:\assemblies\Rattus_norvegicus-Rnor_6.0-dbSNP149\Rattus_norvegicus-Rnor_6.0-dbSNP149.genometemplate\sequences\NC_005103_chr4.gbk#0	184226339	NC_005103.4	+	645	102953301..102953945	690215		LOC690215
LOC108350718	0.001	0.001	2.04	0.001	1	1	2158.65	1	Z-009815	LOC108350718	gene		D:\assemblies\Rattus_norvegicus-Rnor_6.0-dbSNP149\Rattus_norvegicus-Rnor_6.0-dbSNP149.genometemplate\sequences\NC_005103_chr4.gbk#0	184226339	NC_005103.4	-	695	103145468..103144774	108350718		LOC108350718
Reg3b	0.001	0.001	3.827	0.001	1	1	4049.12	1	Z-009833	Reg3b	gene		D:\assemblies\Rattus_norvegicus-Rnor_6.0-dbSNP149\Rattus_norvegicus-Rnor_6.0-dbSNP149.genometemplate\sequences\NC_005103_chr4.gbk#0	184226339	NC_005103.4	+	3239	109467272..109470510	24618, 3254		Reg3b	Pap, Pap1
Reg3g	0.001	0.001	3.84	0.001	1	1	4062.62	1	Z-009837	Reg3g	gene		D:\assemblies\Rattus_norvegicus-Rnor_6.0-dbSNP149\Rattus_norvegicus-Rnor_6.0-dbSNP149.genometemplate\sequences\NC_005103_chr4.gbk#0	184226339	NC_005103.4	-	2556	109532234..109529679	24620, 3256		Reg3g	Pap3, PAPIII
Sema4f	0.005	0.154	1.067	0.001	34.1494	162.94	1129.11	4.77139	Z-009851	Sema4f	gene		D:\assemblies\Rattus_norvegicus-Rnor_6.0-dbSNP149\Rattus_norvegicus-Rnor_6.0-dbSNP149.genometemplate\sequences\NC_005103_chr4.gbk#0	184226339	NC_005103.4	-	26308	113764532..113738225	29745, 3658		Sema4f
M1ap	0.005	0.007	0.121	0.001	1.21117	6.88964	127.641	5.68844	Z-009852	M1ap	gene		D:\assemblies\Rattus_norvegicus-Rnor_6.0-dbSNP149\Rattus_norvegicus-Rnor_6.0-dbSNP149.genometemplate\sequences\NC_005103_chr4.gbk#0	184226339	NC_005103.4	+	91456	113772716..113864171	500223, 1563842		M1ap
Htra2	6.084	10.604	27.011	6.691	1.74287	1.58474	4.03664	0.909276	Z-009855	Htra2	gene		D:\assemblies\Rattus_norvegicus-Rnor_6.0-dbSNP149\Rattus_norvegicus-Rnor_6.0-dbSNP149.genometemplate\sequences\NC_005103_chr4.gbk#0	184226339	NC_005103.4	-	3163	113886833..113883671	297376, 1308906		Htra2	Prss25
Aup1	10.77	15.783	145.642	8.87	1.46546	1.77928	16.4188	1.21414	Z-009856	Aup1	gene		D:\assemblies\Rattus_norvegicus-Rnor_6.0-dbSNP149\Rattus_norvegicus-Rnor_6.0-dbSNP149.genometemplate\sequences\NC_005103_chr4.gbk#0	184226339	NC_005103.4	+	3074	113887030..113890103	680423, 1591777		Aup1
Dqx1	0.227	0.043	3.149	0.166	0.191251	0.261592	18.9367	1.36779	Z-009857	Dqx1	gene		D:\assemblies\Rattus_norvegicus-Rnor_6.0-dbSNP149\Rattus_norvegicus-Rnor_6.0-dbSNP149.genometemplate\sequences\NC_005103_chr4.gbk#0	184226339	NC_005103.4	+	9155	113890201..113899355	680434, 1591766		Dqx1
NEWGENE_1595506	0.001	0.001	0.077	0.001	1	1	81.8252	1	Z-009858	NEWGENE_1595506	gene		D:\assemblies\Rattus_norvegicus-Rnor_6.0-dbSNP149\Rattus_norvegicus-Rnor_6.0-dbSNP149.genometemplate\sequences\NC_005103_chr4.gbk#0	184226339	NC_005103.4	-	3113	113903554..113900442	103692164, 9162340		NEWGENE_1595506
Mrpl53	11.658	32.038	42.171	9.743	2.7483	3.2884	4.32843	1.19652	Z-009862	Mrpl53	gene		D:\assemblies\Rattus_norvegicus-Rnor_6.0-dbSNP149\Rattus_norvegicus-Rnor_6.0-dbSNP149.genometemplate\sequences\NC_005103_chr4.gbk#0	184226339	NC_005103.4	+	891	113942037..113942927	362388, 1306709		Mrpl53
Tlx2	0.001	0.001	0.077	0.001	1	1	81.8252	1	Z-009870	Tlx2	gene		D:\assemblies\Rattus_norvegicus-Rnor_6.0-dbSNP149\Rattus_norvegicus-Rnor_6.0-dbSNP149.genometemplate\sequences\NC_005103_chr4.gbk#0	184226339	NC_005103.4	-	1843	114768243..114766401	680117, 1595506		Tlx2	Hox11L.1
LOC103692169	11.658	32.038	42.171	9.743	2.7483	3.2884	4.32843	1.19652	Z-009874	LOC103692169	gene		D:\assemblies\Rattus_norvegicus-Rnor_6.0-dbSNP149\Rattus_norvegicus-Rnor_6.0-dbSNP149.genometemplate\sequences\NC_005103_chr4.gbk#0	184226339	NC_005103.4	+	1165	114807495..114808659	103692169, 9457461		LOC103692169
Dguok	3.485	12.073	25.866	5.584	3.46458	2.16193	4.63196	0.624008	Z-009891	Dguok	gene		D:\assemblies\Rattus_norvegicus-Rnor_6.0-dbSNP149\Rattus_norvegicus-Rnor_6.0-dbSNP149.genometemplate\sequences\NC_005103_chr4.gbk#0	184226339	NC_005103.4	-	27629	115208061..115180433	297389, 1304799		Dguok
LOC108350818	0.009	0.109	0.001	0.185	12.5829	0.590834	0.00510384	0.0469555	Z-009896	LOC108350818	gene		D:\assemblies\Rattus_norvegicus-Rnor_6.0-dbSNP149\Rattus_norvegicus-Rnor_6.0-dbSNP149.genometemplate\sequences\NC_005103_chr4.gbk#0	184226339	NC_005103.4	+	7770	115379134..115386903	108350818		LOC108350818
Dysf	4.004	5	0.829	4.175	1.24891	1.19776	0.19848	0.959041	Z-009905	Dysf	gene		D:\assemblies\Rattus_norvegicus-Rnor_6.0-dbSNP149\Rattus_norvegicus-Rnor_6.0-dbSNP149.genometemplate\sequences\NC_005103_chr4.gbk#0	184226339	NC_005103.4	+	200932	115700942..115901873	312492, 1311023		Dysf
Dusp11	3.217	9.917	39.518	4.397	3.08228	2.2556	8.98837	0.731796	Z-009930	Dusp11	gene		D:\assemblies\Rattus_norvegicus-Rnor_6.0-dbSNP149\Rattus_norvegicus-Rnor_6.0-dbSNP149.genometemplate\sequences\NC_005103_chr4.gbk#0	184226339	NC_005103.4	-	14035	117631674..117617640	297412, 1307038		Dusp11
LOC103690006	3.217	9.917	39.518	4.397	3.08228	2.2556	8.98837	0.731796	Z-009939	LOC103690006	gene		D:\assemblies\Rattus_norvegicus-Rnor_6.0-dbSNP149\Rattus_norvegicus-Rnor_6.0-dbSNP149.genometemplate\sequences\NC_005103_chr4.gbk#0	184226339	NC_005103.4	-	16998	117814732..117797735	103690006, 9168966		LOC103690006
Add2	12.115	22.327	0.004	16.32	1.84285	1.36809	0.000263245	0.742376	Z-009941	Add2	gene		D:\assemblies\Rattus_norvegicus-Rnor_6.0-dbSNP149\Rattus_norvegicus-Rnor_6.0-dbSNP149.genometemplate\sequences\NC_005103_chr4.gbk#0	184226339	NC_005103.4	+	196263	117691294..117887556	24171, 2042		Add2	beta-ADD
Snrpg	52.851	163.842	433.818	81.558	3.10008	2.0089	5.31913	0.648015	Z-009945	Snrpg	gene		D:\assemblies\Rattus_norvegicus-Rnor_6.0-dbSNP149\Rattus_norvegicus-Rnor_6.0-dbSNP149.genometemplate\sequences\NC_005103_chr4.gbk#0	184226339	NC_005103.4	+	7580	118167267..118174846	681031, 1584713		Snrpg
Rab7a	48.357	63.699	12.134	59.625	1.31726	1.06833	0.203509	0.81102	Z-009987	Rab7a	gene		D:\assemblies\Rattus_norvegicus-Rnor_6.0-dbSNP149\Rattus_norvegicus-Rnor_6.0-dbSNP149.genometemplate\sequences\NC_005103_chr4.gbk#0	184226339	NC_005103.4	-	52605	119963065..119910461	29448, 61908		Rab7a	Rab7
Mgll	17.364	21.895	0.802	21.287	1.26089	1.02852	0.0376893	0.815707	Z-009998	Mgll	gene		D:\assemblies\Rattus_norvegicus-Rnor_6.0-dbSNP149\Rattus_norvegicus-Rnor_6.0-dbSNP149.genometemplate\sequences\NC_005103_chr4.gbk#0	184226339	NC_005103.4	+	102023	120671436..120773458	29254, 71039		Mgll	MAGL
Txnrd3	0.862	1.443	0.33	1.893	1.67287	0.762078	0.174485	0.455551	Z-010010	Txnrd3	gene		D:\assemblies\Rattus_norvegicus-Rnor_6.0-dbSNP149\Rattus_norvegicus-Rnor_6.0-dbSNP149.genometemplate\sequences\NC_005103_chr4.gbk#0	184226339	NC_005103.4	+	38212	121612332..121650543	297437, 1308363		Txnrd3
Cfap100	0.677	1.249	0.157	0.7	1.84527	1.78467	0.224405	0.96716	Z-010028	Cfap100	gene		D:\assemblies\Rattus_norvegicus-Rnor_6.0-dbSNP149\Rattus_norvegicus-Rnor_6.0-dbSNP149.genometemplate\sequences\NC_005103_chr4.gbk#0	184226339	NC_005103.4	-	24401	122338862..122314462	297444, 1305768		Cfap100
LOC108350730	0.001	0.028	2.138	0.003	29.2925	9.44785	729.682	0.322535	Z-010039	LOC108350730	gene		D:\assemblies\Rattus_norvegicus-Rnor_6.0-dbSNP149\Rattus_norvegicus-Rnor_6.0-dbSNP149.genometemplate\sequences\NC_005103_chr4.gbk#0	184226339	NC_005103.4	-	22160	123294291..123272132	108350730		LOC108350730
Iqsec1	3.754	5.321	1.23	4.955	1.41751	1.07376	0.248263	0.757497	Z-010040	Iqsec1	gene		D:\assemblies\Rattus_norvegicus-Rnor_6.0-dbSNP149\Rattus_norvegicus-Rnor_6.0-dbSNP149.genometemplate\sequences\NC_005103_chr4.gbk#0	184226339	NC_005103.4	+	53940	123400717..123454656	686590, 1596313		Iqsec1
Slc6a6	1.392	1.86	0.583	2.477	1.33639	0.750979	0.235445	0.561944	Z-010044	Slc6a6	gene		D:\assemblies\Rattus_norvegicus-Rnor_6.0-dbSNP149\Rattus_norvegicus-Rnor_6.0-dbSNP149.genometemplate\sequences\NC_005103_chr4.gbk#0	184226339	NC_005103.4	-	74851	123713469..123638619	29464, 61912		Slc6a6
LOC102548902	0.168	0.582	3.06	0.451	3.46319	1.29193	6.78789	0.373046	Z-010045	LOC102548902	gene		D:\assemblies\Rattus_norvegicus-Rnor_6.0-dbSNP149\Rattus_norvegicus-Rnor_6.0-dbSNP149.genometemplate\sequences\NC_005103_chr4.gbk#0	184226339	NC_005103.4	+	34396	123703946..123738341	102548902, 7539827		LOC102548902
Adamts9	1.134	1.256	0.073	1.494	1.10794	0.840995	0.0491862	0.759062	Z-010056	Adamts9	gene		D:\assemblies\Rattus_norvegicus-Rnor_6.0-dbSNP149\Rattus_norvegicus-Rnor_6.0-dbSNP149.genometemplate\sequences\NC_005103_chr4.gbk#0	184226339	NC_005103.4	-	200744	124860997..124660254	312566, 1306889		Adamts9
Foxp1	1.623	2.741	29.128	2.992	1.6887	0.916044	9.73514	0.542454	Z-010093	Foxp1	gene		D:\assemblies\Rattus_norvegicus-Rnor_6.0-dbSNP149\Rattus_norvegicus-Rnor_6.0-dbSNP149.genometemplate\sequences\NC_005103_chr4.gbk#0	184226339	NC_005103.4	-	601289	131963466..131362178	297480, 1308669		Foxp1
Gpr27	0.54	0.01	0.001	0.324	0.0182934	0.0304686	0.00291678	1.66555	Z-010096	Gpr27	gene		D:\assemblies\Rattus_norvegicus-Rnor_6.0-dbSNP149\Rattus_norvegicus-Rnor_6.0-dbSNP149.genometemplate\sequences\NC_005103_chr4.gbk#0	184226339	NC_005103.4	+	1134	132137793..132138926	65275, 71067		Gpr27	Sreb1
LOC103692197	0.001	0.001	0.074	0.001	1	1	78.6715	1	Z-010101	LOC103692197	gene		D:\assemblies\Rattus_norvegicus-Rnor_6.0-dbSNP149\Rattus_norvegicus-Rnor_6.0-dbSNP149.genometemplate\sequences\NC_005103_chr4.gbk#0	184226339	NC_005103.4	-	8801	132439747..132430947	103692197, 9307839		LOC103692197
Pdzrn3	1.874	1.595	0.266	1.862	0.851018	0.856246	0.142707	1.00614	Z-010113	Pdzrn3	gene		D:\assemblies\Rattus_norvegicus-Rnor_6.0-dbSNP149\Rattus_norvegicus-Rnor_6.0-dbSNP149.genometemplate\sequences\NC_005103_chr4.gbk#0	184226339	NC_005103.4	-	234144	133951282..133717139	312607, 1305250		Pdzrn3
LOC102547466	0.078	0.224	0.338	0.033	2.88577	6.83183	10.3036	2.36742	Z-010130	LOC102547466	gene		D:\assemblies\Rattus_norvegicus-Rnor_6.0-dbSNP149\Rattus_norvegicus-Rnor_6.0-dbSNP149.genometemplate\sequences\NC_005103_chr4.gbk#0	184226339	NC_005103.4	-	29750	140594171..140564422	102547466, 7723051		LOC102547466
LOC108350743	0.001	0.008	0.076	0.001	8.91387	8.91387	80.4975	1	Z-010137	LOC108350743	gene		D:\assemblies\Rattus_norvegicus-Rnor_6.0-dbSNP149\Rattus_norvegicus-Rnor_6.0-dbSNP149.genometemplate\sequences\NC_005103_chr4.gbk#0	184226339	NC_005103.4	-	9122	142006546..141997425	108350743		LOC108350743
Thumpd3-as1	0.944	2.762	23.228	0.915	2.92675	3.0178	25.3785	1.03111	Z-010150	Thumpd3-as1	gene		D:\assemblies\Rattus_norvegicus-Rnor_6.0-dbSNP149\Rattus_norvegicus-Rnor_6.0-dbSNP149.genometemplate\sequences\NC_005103_chr4.gbk#0	184226339	NC_005103.4	-	6507	145017388..145010882	100911652, 6491660		Thumpd3-as1
LOC102548450	0.167	0.041	1.269	0.001	0.244522	43.1724	1342.79	176.558	Z-010163	LOC102548450	gene		D:\assemblies\Rattus_norvegicus-Rnor_6.0-dbSNP149\Rattus_norvegicus-Rnor_6.0-dbSNP149.genometemplate\sequences\NC_005103_chr4.gbk#0	184226339	NC_005103.4	+	3098	145373527..145376624	102548450, 7499834		LOC102548450
LOC108350745	0.001	0.001	0.012	0.001	1	1	13.0377	1	Z-010180	LOC108350745	gene		D:\assemblies\Rattus_norvegicus-Rnor_6.0-dbSNP149\Rattus_norvegicus-Rnor_6.0-dbSNP149.genometemplate\sequences\NC_005103_chr4.gbk#0	184226339	NC_005103.4	+	14838	146071280..146086117	108350745		LOC108350745
LOC108350747	0.006	0.008	0.19	0.001	1.26867	8.0208	201.398	6.32223	Z-010186	LOC108350747	gene		D:\assemblies\Rattus_norvegicus-Rnor_6.0-dbSNP149\Rattus_norvegicus-Rnor_6.0-dbSNP149.genometemplate\sequences\NC_005103_chr4.gbk#0	184226339	NC_005103.4	-	1695	146560078..146558384	108350747		LOC108350747
Tmem40	3.279	0.393	0.001	2.115	0.119874	0.185796	0.000446769	1.54993	Z-010199	Tmem40	gene		D:\assemblies\Rattus_norvegicus-Rnor_6.0-dbSNP149\Rattus_norvegicus-Rnor_6.0-dbSNP149.genometemplate\sequences\NC_005103_chr4.gbk#0	184226339	NC_005103.4	-	12515	147657847..147645333	680858, 1587025		Tmem40	RGD1306976
Rpl32	651.359	1681.68	8856.48	791.872	2.5818	2.12368	11.1842	0.822557	Z-010201	Rpl32	gene		D:\assemblies\Rattus_norvegicus-Rnor_6.0-dbSNP149\Rattus_norvegicus-Rnor_6.0-dbSNP149.genometemplate\sequences\NC_005103_chr4.gbk#0	184226339	NC_005103.4	-	3565	147719044..147715480	28298, 621203		Rpl32
H1foo	0.001	0.001	0.21	0.001	1	1	222.333	1	Z-010206	H1foo	gene		D:\assemblies\Rattus_norvegicus-Rnor_6.0-dbSNP149\Rattus_norvegicus-Rnor_6.0-dbSNP149.genometemplate\sequences\NC_005103_chr4.gbk#0	184226339	NC_005103.4	+	5122	147844658..147849779	502875, 1566236		H1foo	RGD1566236
2018-03-08	4.927	8.538	0.58	6.1	1.73285	1.39948	0.0950098	0.807619	Z-010212	2018-03-08	gene		D:\assemblies\Rattus_norvegicus-Rnor_6.0-dbSNP149\Rattus_norvegicus-Rnor_6.0-dbSNP149.genometemplate\sequences\NC_005103_chr4.gbk#0	184226339	NC_005103.4	+	112682	148285467..148398148	312656, 1309339		2018-03-08	Mir
Rassf4	5.151	9.812	1.473	9.172	1.90493	1.06979	0.160619	0.561591	Z-010225	Rassf4	gene		D:\assemblies\Rattus_norvegicus-Rnor_6.0-dbSNP149\Rattus_norvegicus-Rnor_6.0-dbSNP149.genometemplate\sequences\NC_005103_chr4.gbk#0	184226339	NC_005103.4	-	35204	148804295..148769092	362423, 1307785		Rassf4
Cxcl12	360.738	516.254	11.715	463.354	1.43111	1.11417	0.0252836	0.778535	Z-010230	Cxcl12	gene		D:\assemblies\Rattus_norvegicus-Rnor_6.0-dbSNP149\Rattus_norvegicus-Rnor_6.0-dbSNP149.genometemplate\sequences\NC_005103_chr4.gbk#0	184226339	NC_005103.4	+	12848	149261044..149273891	24772, 3651		Cxcl12	Sdf1
Wnt5b	0.108	0.01	0.17	0.001	0.0915195	10.4368	180.341	114.04	Z-010250	Wnt5b	gene		D:\assemblies\Rattus_norvegicus-Rnor_6.0-dbSNP149\Rattus_norvegicus-Rnor_6.0-dbSNP149.genometemplate\sequences\NC_005103_chr4.gbk#0	184226339	NC_005103.4	-	15933	151516894..151500962	282582, 628850		Wnt5b
Cecr6	0.239	1.201	7.241	0.211	5.02786	5.68762	34.2821	1.13122	Z-010260	Cecr6	gene		D:\assemblies\Rattus_norvegicus-Rnor_6.0-dbSNP149\Rattus_norvegicus-Rnor_6.0-dbSNP149.genometemplate\sequences\NC_005103_chr4.gbk#0	184226339	NC_005103.4	-	11511	153029673..153018163	500307, 1565302		Cecr6
Cecr2	0.763	1.369	0.189	0.99	1.7929	1.383	0.191382	0.771378	Z-010263	Cecr2	gene		D:\assemblies\Rattus_norvegicus-Rnor_6.0-dbSNP149\Rattus_norvegicus-Rnor_6.0-dbSNP149.genometemplate\sequences\NC_005103_chr4.gbk#0	184226339	NC_005103.4	+	109633	153217521..153327153	500308, 1564182		Cecr2	RGD1564182
Bcl2l13	7.416	9.134	1.018	7.669	1.2317	1.19104	0.132749	0.966988	Z-010267	Bcl2l13	gene		D:\assemblies\Rattus_norvegicus-Rnor_6.0-dbSNP149\Rattus_norvegicus-Rnor_6.0-dbSNP149.genometemplate\sequences\NC_005103_chr4.gbk#0	184226339	NC_005103.4	+	52897	153385200..153438096	312682, 1306985		Bcl2l13
Tuba8	4.248	18.5	0.259	5.366	4.35509	3.44748	0.0483435	0.791598	Z-010273	Tuba8	gene		D:\assemblies\Rattus_norvegicus-Rnor_6.0-dbSNP149\Rattus_norvegicus-Rnor_6.0-dbSNP149.genometemplate\sequences\NC_005103_chr4.gbk#0	184226339	NC_005103.4	+	16713	153774511..153791223	500377, 1566041		Tuba8
Aicda	0.001	0.006	1.365	0.001	6.43415	6.43415	1444.27	1	Z-010299	Aicda	gene		D:\assemblies\Rattus_norvegicus-Rnor_6.0-dbSNP149\Rattus_norvegicus-Rnor_6.0-dbSNP149.genometemplate\sequences\NC_005103_chr4.gbk#0	184226339	NC_005103.4	+	11196	155359909..155371104	399679, 1303222		Aicda	aid
Clec4a	4.99	9.846	1.356	7.214	1.97297	1.3649	0.187912	0.691798	Z-010313	Clec4a	gene		D:\assemblies\Rattus_norvegicus-Rnor_6.0-dbSNP149\Rattus_norvegicus-Rnor_6.0-dbSNP149.genometemplate\sequences\NC_005103_chr4.gbk#0	184226339	NC_005103.4	+	19461	156049800..156069260	474143, 1359662		Clec4a	Clecsf6, Dcir1
Clec4d	1.408	2.038	0.001	1.438	1.44774	1.41743	0.000657251	0.979065	Z-010315	Clec4d	gene		D:\assemblies\Rattus_norvegicus-Rnor_6.0-dbSNP149\Rattus_norvegicus-Rnor_6.0-dbSNP149.genometemplate\sequences\NC_005103_chr4.gbk#0	184226339	NC_005103.4	+	11683	156253084..156264766	362432, 1303339		Clec4d	Clecsf8, Mcl
Cd163	12.664	8.706	0.409	14.409	0.687449	0.604182	0.0283578	0.878876	Z-010322	Cd163	gene		D:\assemblies\Rattus_norvegicus-Rnor_6.0-dbSNP149\Rattus_norvegicus-Rnor_6.0-dbSNP149.genometemplate\sequences\NC_005103_chr4.gbk#0	184226339	NC_005103.4	+	33405	156752063..156785467	312701, 1310382		Cd163
LOC102553919	0.005	0.001	1.956	0.001	0.177999	1	2069.74	5.61802	Z-010343	LOC102553919	gene		D:\assemblies\Rattus_norvegicus-Rnor_6.0-dbSNP149\Rattus_norvegicus-Rnor_6.0-dbSNP149.genometemplate\sequences\NC_005103_chr4.gbk#0	184226339	NC_005103.4	+	798	157274519..157275316	102553919, 7547546		LOC102553919
Cdca3	22.047	57.259	6.205	30.332	2.59717	1.88772	0.204551	0.726838	Z-010349	Cdca3	gene		D:\assemblies\Rattus_norvegicus-Rnor_6.0-dbSNP149\Rattus_norvegicus-Rnor_6.0-dbSNP149.genometemplate\sequences\NC_005103_chr4.gbk#0	184226339	NC_005103.4	+	4014	157347876..157351889	297594, 1359093		Cdca3
Pianp	0.011	0.007	0.209	0.001	0.597884	7.18093	221.103	12.0106	Z-010359	Pianp	gene		D:\assemblies\Rattus_norvegicus-Rnor_6.0-dbSNP149\Rattus_norvegicus-Rnor_6.0-dbSNP149.genometemplate\sequences\NC_005103_chr4.gbk#0	184226339	NC_005103.4	+	8815	157508862..157517676	312711, 1304952		Pianp	leda-1, PANP, RGD1304952
Tapbpl	2.249	2.903	17.49	2.115	1.29078	1.37225	8.26859	1.06311	Z-010372	Tapbpl	gene		D:\assemblies\Rattus_norvegicus-Rnor_6.0-dbSNP149\Rattus_norvegicus-Rnor_6.0-dbSNP149.genometemplate\sequences\NC_005103_chr4.gbk#0	184226339	NC_005103.4	-	7452	157743199..157735748	297602, 1307893		Tapbpl
LOC102555485	0.004	0.785	0.127	0.001	191.882	830.425	134.149	4.32778	Z-010374	LOC102555485	gene		D:\assemblies\Rattus_norvegicus-Rnor_6.0-dbSNP149\Rattus_norvegicus-Rnor_6.0-dbSNP149.genometemplate\sequences\NC_005103_chr4.gbk#0	184226339	NC_005103.4	+	2748	157751751..157754498	102555485, 7654957		LOC102555485
LOC102555545	0.015	0.051	2.866	0.142	3.51734	0.359268	20.1619	0.102142	Z-010375	LOC102555545	gene		D:\assemblies\Rattus_norvegicus-Rnor_6.0-dbSNP149\Rattus_norvegicus-Rnor_6.0-dbSNP149.genometemplate\sequences\NC_005103_chr4.gbk#0	184226339	NC_005103.4	+	13094	157773270..157786363	102555545, 7708239		LOC102555545
Scnn1a	0.231	0.423	0.062	0.403	1.82927	1.0499	0.154777	0.573947	Z-010378	Scnn1a	gene		D:\assemblies\Rattus_norvegicus-Rnor_6.0-dbSNP149\Rattus_norvegicus-Rnor_6.0-dbSNP149.genometemplate\sequences\NC_005103_chr4.gbk#0	184226339	NC_005103.4	+	26134	157834339..157860472	25122, 3639		Scnn1a
Ntf3	0.075	0.095	1.455	0.25	1.25856	0.378255	5.81294	0.300546	Z-010384	Ntf3	gene		D:\assemblies\Rattus_norvegicus-Rnor_6.0-dbSNP149\Rattus_norvegicus-Rnor_6.0-dbSNP149.genometemplate\sequences\NC_005103_chr4.gbk#0	184226339	NC_005103.4	-	69004	158705886..158636883	81737, 619728		Ntf3
Dyrk4	0.001	0.001	0.249	0.001	1	1	263.939	1	Z-010395	Dyrk4	gene		D:\assemblies\Rattus_norvegicus-Rnor_6.0-dbSNP149\Rattus_norvegicus-Rnor_6.0-dbSNP149.genometemplate\sequences\NC_005103_chr4.gbk#0	184226339	NC_005103.4	-	41527	159467973..159426447	312721, 1306800		Dyrk4
LOC102548836	0.001	0.004	0.01	0.001	3.774	3.774	11.1013	1	Z-010409	LOC102548836	gene		D:\assemblies\Rattus_norvegicus-Rnor_6.0-dbSNP149\Rattus_norvegicus-Rnor_6.0-dbSNP149.genometemplate\sequences\NC_005103_chr4.gbk#0	184226339	NC_005103.4	-	16436	160357962..160341527	102548836, 7623583		LOC102548836
Senp18	7.224	45.655	1.445	9.807	6.32003	4.65537	0.147359	0.736606	Z-010414	Senp18	gene		D:\assemblies\Rattus_norvegicus-Rnor_6.0-dbSNP149\Rattus_norvegicus-Rnor_6.0-dbSNP149.genometemplate\sequences\NC_005103_chr4.gbk#0	184226339	NC_005103.4	-	1428	160803558..160802131	408222, 1303230		Senp18
Senp17	3.006	14.072	0.304	4.538	4.68066	3.10113	0.0670771	0.66254	Z-010416	Senp17	gene		D:\assemblies\Rattus_norvegicus-Rnor_6.0-dbSNP149\Rattus_norvegicus-Rnor_6.0-dbSNP149.genometemplate\sequences\NC_005103_chr4.gbk#0	184226339	NC_005103.4	-	1000	160866064..160865065	408216, 1303080		Senp17
LOC683408	3.837	26.481	1.161	5.516	6.90121	4.80115	0.210533	0.695696	Z-010418	LOC683408	gene		D:\assemblies\Rattus_norvegicus-Rnor_6.0-dbSNP149\Rattus_norvegicus-Rnor_6.0-dbSNP149.genometemplate\sequences\NC_005103_chr4.gbk#0	184226339	NC_005103.4	-	757	160966601..160965845	683408, 1586882		LOC683408
Pzp	0.003	0.017	0.043	0.001	6.08936	17.4892	44.9802	2.8721	Z-010443	Pzp	gene		D:\assemblies\Rattus_norvegicus-Rnor_6.0-dbSNP149\Rattus_norvegicus-Rnor_6.0-dbSNP149.genometemplate\sequences\NC_005103_chr4.gbk#0	184226339	NC_005103.4	-	46086	161850877..161804792	252922, 628643		Pzp	A1m
LOC102554736	0.004	0.001	0.043	0.001	0.225971	1	45.311	4.42534	Z-010446	LOC102554736	gene		D:\assemblies\Rattus_norvegicus-Rnor_6.0-dbSNP149\Rattus_norvegicus-Rnor_6.0-dbSNP149.genometemplate\sequences\NC_005103_chr4.gbk#0	184226339	NC_005103.4	-	16523	161945250..161928728	102554736, 7556630		LOC102554736
Clec2d	0.01	0.001	0.279	0.001	0.0974046	1	295.239	10.2665	Z-010455	Clec2d	gene		D:\assemblies\Rattus_norvegicus-Rnor_6.0-dbSNP149\Rattus_norvegicus-Rnor_6.0-dbSNP149.genometemplate\sequences\NC_005103_chr4.gbk#0	184226339	NC_005103.4	+	24630	162278252..162302881	113937, 620070		Clec2d	Clec2d5, Ocil
LOC100912974	5.885	11.088	34.831	6.975	1.88415	1.58955	4.99332	0.843639	Z-010458	LOC100912974	gene		D:\assemblies\Rattus_norvegicus-Rnor_6.0-dbSNP149\Rattus_norvegicus-Rnor_6.0-dbSNP149.genometemplate\sequences\NC_005103_chr4.gbk#0	184226339	NC_005103.4	-	18890	162440495..162421606	100912974, 6484980		LOC100912974
Clec2d2	0.005	0.007	0.75	0.001	1.38644	7.16778	793.097	5.16992	Z-010459	Clec2d2	gene		D:\assemblies\Rattus_norvegicus-Rnor_6.0-dbSNP149\Rattus_norvegicus-Rnor_6.0-dbSNP149.genometemplate\sequences\NC_005103_chr4.gbk#0	184226339	NC_005103.4	+	16616	162434155..162450770	362445, 1562831		Clec2d2	Clr2, RGD1562831
LOC100362418	0.001	0.001	0.213	0.001	1	1	225.788	1	Z-010468	LOC100362418	gene		D:\assemblies\Rattus_norvegicus-Rnor_6.0-dbSNP149\Rattus_norvegicus-Rnor_6.0-dbSNP149.genometemplate\sequences\NC_005103_chr4.gbk#0	184226339	NC_005103.4	+	5349	162880504..162885852	100362418, 2318170		LOC100362418
LOC100909928	0.781	1.754	7.567	0.882	2.24637	1.98982	8.58367	0.885795	Z-010471	LOC100909928	gene		D:\assemblies\Rattus_norvegicus-Rnor_6.0-dbSNP149\Rattus_norvegicus-Rnor_6.0-dbSNP149.genometemplate\sequences\NC_005103_chr4.gbk#0	184226339	NC_005103.4	-	2851	162991176..162988326	100909928, 6500959		LOC100909928
Clec1b	61.703	155.385	1.897	61.781	2.51826	2.51507	0.0307004	0.998735	Z-010478	Clec1b	gene		D:\assemblies\Rattus_norvegicus-Rnor_6.0-dbSNP149\Rattus_norvegicus-Rnor_6.0-dbSNP149.genometemplate\sequences\NC_005103_chr4.gbk#0	184226339	NC_005103.4	+	8530	163161941..163170470	500336, 1563517		Clec1b	RGD1563517
Clec9a	0.013	0.069	0.542	0.001	5.33922	73.0095	573.681	13.6742	Z-010479	Clec9a	gene		D:\assemblies\Rattus_norvegicus-Rnor_6.0-dbSNP149\Rattus_norvegicus-Rnor_6.0-dbSNP149.genometemplate\sequences\NC_005103_chr4.gbk#0	184226339	NC_005103.4	+	15940	163173593..163189532	502901, 1562513		Clec9a	RGD1562513
Klre1	0.001	0.001	0.969	0.001	1	1	1025.55	1	Z-010486	Klre1	gene		D:\assemblies\Rattus_norvegicus-Rnor_6.0-dbSNP149\Rattus_norvegicus-Rnor_6.0-dbSNP149.genometemplate\sequences\NC_005103_chr4.gbk#0	184226339	NC_005103.4	+	8367	163346684..163355050	297645, 727903		Klre1
Klrd1	0.001	0.009	19.062	0.001	9.97786	9.97786	20168.4	1	Z-010487	Klrd1	gene		D:\assemblies\Rattus_norvegicus-Rnor_6.0-dbSNP149\Rattus_norvegicus-Rnor_6.0-dbSNP149.genometemplate\sequences\NC_005103_chr4.gbk#0	184226339	NC_005103.4	+	11571	163358355..163369925	25110, 2978		Klrd1	Cd94
Klrc3	0.006	0.004	0.579	0.002	0.693821	1.85673	242.51	2.67609	Z-010489	Klrc3	gene		D:\assemblies\Rattus_norvegicus-Rnor_6.0-dbSNP149\Rattus_norvegicus-Rnor_6.0-dbSNP149.genometemplate\sequences\NC_005103_chr4.gbk#0	184226339	NC_005103.4	-	10959	163427331..163416373	500338, 1560637		Klrc3
Klri1	0.045	0.071	3.68	0.001	1.57908	75.5751	3893.2	47.8601	Z-010492	Klri1	gene		D:\assemblies\Rattus_norvegicus-Rnor_6.0-dbSNP149\Rattus_norvegicus-Rnor_6.0-dbSNP149.genometemplate\sequences\NC_005103_chr4.gbk#0	184226339	NC_005103.4	-	33259	163528237..163494979	503651, 1359344		Klri1
Ly49s5	0.001	0.001	0.271	0.001	1	1	286.885	1	Z-010507	Ly49s5	gene		D:\assemblies\Rattus_norvegicus-Rnor_6.0-dbSNP149\Rattus_norvegicus-Rnor_6.0-dbSNP149.genometemplate\sequences\NC_005103_chr4.gbk#0	184226339	NC_005103.4	-	21591	164306500..164284910	503662, 1359728		Ly49s5
LOC103692235	0.001	0.001	2.465	0.001	1	1	2608.63	1	Z-010515	LOC103692235	gene		D:\assemblies\Rattus_norvegicus-Rnor_6.0-dbSNP149\Rattus_norvegicus-Rnor_6.0-dbSNP149.genometemplate\sequences\NC_005103_chr4.gbk#0	184226339	NC_005103.4	-	381	164788838..164788458	103692235, 9263295		LOC103692235
Ybx3	119.541	253.542	23.796	148.287	2.12097	1.70981	0.160471	0.806144	Z-010525	Ybx3	gene		D:\assemblies\Rattus_norvegicus-Rnor_6.0-dbSNP149\Rattus_norvegicus-Rnor_6.0-dbSNP149.genometemplate\sequences\NC_005103_chr4.gbk#0	184226339	NC_005103.4	-	23223	165630041..165606819	83807, 621056		Ybx3	Csda, Dbpa, Yb2
LOC690326	0.053	0.012	1.085	0.001	0.234793	13.2089	1147.48	56.2575	Z-010526	LOC690326	gene		D:\assemblies\Rattus_norvegicus-Rnor_6.0-dbSNP149\Rattus_norvegicus-Rnor_6.0-dbSNP149.genometemplate\sequences\NC_005103_chr4.gbk#0	184226339	NC_005103.4	+	54783	165682977..165737759	690326, 1597362		LOC690326
Prpmp5	0.001	0.001	0.236	0.001	1	1	250.125	1	Z-010534	Prpmp5	gene		D:\assemblies\Rattus_norvegicus-Rnor_6.0-dbSNP149\Rattus_norvegicus-Rnor_6.0-dbSNP149.genometemplate\sequences\NC_005103_chr4.gbk#0	184226339	NC_005103.4	-	3110	166016335..166013226	257651, 628797		Prpmp5	Prb1, Prpg2
Prr21	0.001	0.001	0.073	0.001	1	1	77.1685	1	Z-010535	Prr21	gene		D:\assemblies\Rattus_norvegicus-Rnor_6.0-dbSNP149\Rattus_norvegicus-Rnor_6.0-dbSNP149.genometemplate\sequences\NC_005103_chr4.gbk#0	184226339	NC_005103.4	+	4806	166040503..166045308	245985, 620386		Prr21	Sgp158
Tas2r140	0.001	0.001	0.369	0.001	1	1	390.519	1	Z-010562	Tas2r140	gene		D:\assemblies\Rattus_norvegicus-Rnor_6.0-dbSNP149\Rattus_norvegicus-Rnor_6.0-dbSNP149.genometemplate\sequences\NC_005103_chr4.gbk#0	184226339	NC_005103.4	-	939	167202106..167201168	689869, 1587511		Tas2r140
Bcl2l14	0.01	0.008	2.149	0.001	0.79921	8.07763	2273.52	10.107	Z-010572	Bcl2l14	gene		D:\assemblies\Rattus_norvegicus-Rnor_6.0-dbSNP149\Rattus_norvegicus-Rnor_6.0-dbSNP149.genometemplate\sequences\NC_005103_chr4.gbk#0	184226339	NC_005103.4	+	43763	168139964..168183726	500348, 1562777		Bcl2l14
Hebp1	32.451	66.889	6.68	47.997	2.06124	1.3936	0.139172	0.676099	Z-010589	Hebp1	gene		D:\assemblies\Rattus_norvegicus-Rnor_6.0-dbSNP149\Rattus_norvegicus-Rnor_6.0-dbSNP149.genometemplate\sequences\NC_005103_chr4.gbk#0	184226339	NC_005103.4	-	29517	168933102..168903586	362454, 1304581		Hebp1
Emp1	4.935	6.903	0.001	8.345	1.39884	0.827124	0.000113252	0.591294	Z-010594	Emp1	gene		D:\assemblies\Rattus_norvegicus-Rnor_6.0-dbSNP149\Rattus_norvegicus-Rnor_6.0-dbSNP149.genometemplate\sequences\NC_005103_chr4.gbk#0	184226339	NC_005103.4	+	20892	169161076..169181967	25314, 2552		Emp1	CL-20, EMP-1, ENP1MR, TMP
LOC103690002	14.114	51.471	196.244	20.029	3.64673	2.56976	9.79777	0.704675	Z-010601	LOC103690002	gene		D:\assemblies\Rattus_norvegicus-Rnor_6.0-dbSNP149\Rattus_norvegicus-Rnor_6.0-dbSNP149.genometemplate\sequences\NC_005103_chr4.gbk#0	184226339	NC_005103.4	+	525	170148955..170149479	103690002, 9140761		LOC103690002
RGD1562378	0.247	9.427	13.49	2.905	38.2039	3.24553	4.64453	0.0849528	Z-010615	RGD1562378	gene		D:\assemblies\Rattus_norvegicus-Rnor_6.0-dbSNP149\Rattus_norvegicus-Rnor_6.0-dbSNP149.genometemplate\sequences\NC_005103_chr4.gbk#0	184226339	NC_005103.4	-	1101	170763962..170762862	500351, 1562378		RGD1562378
H2afj	14.114	51.471	196.244	20.029	3.64673	2.56976	9.79777	0.704675	Z-010616	H2afj	gene		D:\assemblies\Rattus_norvegicus-Rnor_6.0-dbSNP149\Rattus_norvegicus-Rnor_6.0-dbSNP149.genometemplate\sequences\NC_005103_chr4.gbk#0	184226339	NC_005103.4	+	485	170766900..170767384	690795, 1592176		H2afj	H2a/j
LOC103692250	0.274	0.876	1.711	0.162	3.20078	5.39854	10.5425	1.68663	Z-010635	LOC103692250	gene		D:\assemblies\Rattus_norvegicus-Rnor_6.0-dbSNP149\Rattus_norvegicus-Rnor_6.0-dbSNP149.genometemplate\sequences\NC_005103_chr4.gbk#0	184226339	NC_005103.4	+	11915	171748386..171760300	103692250, 9400932		LOC103692250
LOC102547697	0.009	0.316	0.034	0.001	33.8093	334.112	36.3436	9.88227	Z-010645	LOC102547697	gene		D:\assemblies\Rattus_norvegicus-Rnor_6.0-dbSNP149\Rattus_norvegicus-Rnor_6.0-dbSNP149.genometemplate\sequences\NC_005103_chr4.gbk#0	184226339	NC_005103.4	-	16667	173449495..173432829	102547697, 7691241		LOC102547697
Pde3a	0.222	0.09	0.001	0.442	0.406648	0.204719	0.00213989	0.503431	Z-010659	Pde3a	gene		D:\assemblies\Rattus_norvegicus-Rnor_6.0-dbSNP149\Rattus_norvegicus-Rnor_6.0-dbSNP149.genometemplate\sequences\NC_005103_chr4.gbk#0	184226339	NC_005103.4	+	271941	175431904..175703844	50678, 61942		Pde3a	RNPDE3A
LOC102549024	0.001	0.001	0.066	0.001	1	1	70.1359	1	Z-010672	LOC102549024	gene		D:\assemblies\Rattus_norvegicus-Rnor_6.0-dbSNP149\Rattus_norvegicus-Rnor_6.0-dbSNP149.genometemplate\sequences\NC_005103_chr4.gbk#0	184226339	NC_005103.4	+	4299	176559536..176563834	102549024, 7517602		LOC102549024
St8sia1	0.006	0.001	3.491	0.001	0.161723	1	3693.66	6.18343	Z-010683	St8sia1	gene		D:\assemblies\Rattus_norvegicus-Rnor_6.0-dbSNP149\Rattus_norvegicus-Rnor_6.0-dbSNP149.genometemplate\sequences\NC_005103_chr4.gbk#0	184226339	NC_005103.4	-	130677	177195942..177065266	25280, 3679		St8sia1	Siat8, Siat8a
LOC108350787	0.005	0.001	0.001	0.031	0.198073	0.0303664	0.0303664	0.153309	Z-010700	LOC108350787	gene		D:\assemblies\Rattus_norvegicus-Rnor_6.0-dbSNP149\Rattus_norvegicus-Rnor_6.0-dbSNP149.genometemplate\sequences\NC_005103_chr4.gbk#0	184226339	NC_005103.4	+	34153	179759657..179793809	108350787		LOC108350787
LOC108350792	0.001	0.004	0.033	0.001	4.59459	4.59459	34.9978	1	Z-010722	LOC108350792	gene		D:\assemblies\Rattus_norvegicus-Rnor_6.0-dbSNP149\Rattus_norvegicus-Rnor_6.0-dbSNP149.genometemplate\sequences\NC_005103_chr4.gbk#0	184226339	NC_005103.4	+	13307	181161314..181174620	108350792		LOC108350792
LOC108350793	0.001	0.004	0.033	0.001	4.59459	4.59459	34.9978	1	Z-010724	LOC108350793	gene		D:\assemblies\Rattus_norvegicus-Rnor_6.0-dbSNP149\Rattus_norvegicus-Rnor_6.0-dbSNP149.genometemplate\sequences\NC_005103_chr4.gbk#0	184226339	NC_005103.4	+	13319	181224227..181237545	108350793		LOC108350793
LOC102554020	0.004	0.001	0.098	0.001	0.268169	1	104.03	3.729	Z-010736	LOC102554020	gene		D:\assemblies\Rattus_norvegicus-Rnor_6.0-dbSNP149\Rattus_norvegicus-Rnor_6.0-dbSNP149.genometemplate\sequences\NC_005103_chr4.gbk#0	184226339	NC_005103.4	+	5678	182091757..182097434	102554020, 7718100		LOC102554020
RGD1309621	1.842	3.251	17.704	2.149	1.7645	1.51274	8.23814	0.857319	Z-010753	RGD1309621	gene		D:\assemblies\Rattus_norvegicus-Rnor_6.0-dbSNP149\Rattus_norvegicus-Rnor_6.0-dbSNP149.genometemplate\sequences\NC_005103_chr4.gbk#0	184226339	NC_005103.4	+	26631	183879177..183905807	316982, 1309621		RGD1309621
LOC108350919	0.614	0.589	0.037	0.652	0.959474	0.902705	0.0568654	0.940833	Z-010787	LOC108350919	gene		D:\assemblies\Rattus_norvegicus-Rnor_6.0-dbSNP149\Rattus_norvegicus-Rnor_6.0-dbSNP149.genometemplate\sequences\NC_005104_chr5.gbk#0	173707219	NC_005104.4	+	14287	4500827..4515113	108350919		LOC108350919
Slco5a1	0.018	0.001	0.654	0.001	0.0534384	1	692.142	18.7131	Z-010801	Slco5a1	gene		D:\assemblies\Rattus_norvegicus-Rnor_6.0-dbSNP149\Rattus_norvegicus-Rnor_6.0-dbSNP149.genometemplate\sequences\NC_005104_chr5.gbk#0	173707219	NC_005104.4	+	128387	5866362..5994748	312907, 1307132		Slco5a1
Sulf1	1.674	2.888	0.329	2.612	1.72545	1.10577	0.125966	0.640858	Z-010802	Sulf1	gene		D:\assemblies\Rattus_norvegicus-Rnor_6.0-dbSNP149\Rattus_norvegicus-Rnor_6.0-dbSNP149.genometemplate\sequences\NC_005104_chr5.gbk#0	173707219	NC_005104.4	-	187382	6186901..5999520	171396, 708554		Sulf1
Prex2	2.641	2.421	0.155	2.885	0.916817	0.839152	0.0538644	0.915289	Z-010810	Prex2	gene		D:\assemblies\Rattus_norvegicus-Rnor_6.0-dbSNP149\Rattus_norvegicus-Rnor_6.0-dbSNP149.genometemplate\sequences\NC_005104_chr5.gbk#0	173707219	NC_005104.4	-	319048	7941715..7622668	312912, 1307865		Prex2	Depdc2
LOC102556004	7.162	18.177	41.508	7.686	2.53791	2.36499	5.40057	0.931865	Z-010819	LOC102556004	gene		D:\assemblies\Rattus_norvegicus-Rnor_6.0-dbSNP149\Rattus_norvegicus-Rnor_6.0-dbSNP149.genometemplate\sequences\NC_005104_chr5.gbk#0	173707219	NC_005104.4	+	2120	8977979..8980098	102556004, 7721328		LOC102556004
Rgs20	0.001	0.011	0.144	0.001	12.1334	12.1334	152.306	1	Z-010844	Rgs20	gene		D:\assemblies\Rattus_norvegicus-Rnor_6.0-dbSNP149\Rattus_norvegicus-Rnor_6.0-dbSNP149.genometemplate\sequences\NC_005104_chr5.gbk#0	173707219	NC_005104.4	+	126551	14367498..14494048	362477, 1586146		Rgs20
Lyn	22.848	47.39	7.681	31.015	2.07417	1.52799	0.24765	0.736675	Z-010858	Lyn	gene		D:\assemblies\Rattus_norvegicus-Rnor_6.0-dbSNP149\Rattus_norvegicus-Rnor_6.0-dbSNP149.genometemplate\sequences\NC_005104_chr5.gbk#0	173707219	NC_005104.4	+	116591	16526058..16642648	81515, 621017		Lyn	p53Lyn, p56Lyn
Rps20	110.331	302.271	885.462	145.598	2.73968	2.07607	6.08154	0.757776	Z-010859	Rps20	gene		D:\assemblies\Rattus_norvegicus-Rnor_6.0-dbSNP149\Rattus_norvegicus-Rnor_6.0-dbSNP149.genometemplate\sequences\NC_005104_chr5.gbk#0	173707219	NC_005104.4	-	1163	16707214..16706052	122772, 621037		Rps20
Chchd7	6.545	18.86	38.166	7.467	2.88187	2.526	5.11157	0.876515	Z-010863	Chchd7	gene		D:\assemblies\Rattus_norvegicus-Rnor_6.0-dbSNP149\Rattus_norvegicus-Rnor_6.0-dbSNP149.genometemplate\sequences\NC_005104_chr5.gbk#0	173707219	NC_005104.4	+	4557	16843253..16847809	684258, 1592689		Chchd7
Fam110b	1.615	4.02	0.495	2.851	2.4893	1.40991	0.173618	0.566388	Z-010873	Fam110b	gene		D:\assemblies\Rattus_norvegicus-Rnor_6.0-dbSNP149\Rattus_norvegicus-Rnor_6.0-dbSNP149.genometemplate\sequences\NC_005104_chr5.gbk#0	173707219	NC_005104.4	+	141331	18762488..18903818	500400, 1563403		Fam110b
Sdcbp	52.102	97.726	11.515	69.013	1.87567	1.41605	0.166853	0.754955	Z-010878	Sdcbp	gene		D:\assemblies\Rattus_norvegicus-Rnor_6.0-dbSNP149\Rattus_norvegicus-Rnor_6.0-dbSNP149.genometemplate\sequences\NC_005104_chr5.gbk#0	173707219	NC_005104.4	+	26836	19471664..19498499	83841, 621497		Sdcbp	mda-9, TACIP18
LOC108350926	0.001	0.001	1.586	0.001	1	1	1677.7	1	Z-010882	LOC108350926	gene		D:\assemblies\Rattus_norvegicus-Rnor_6.0-dbSNP149\Rattus_norvegicus-Rnor_6.0-dbSNP149.genometemplate\sequences\NC_005104_chr5.gbk#0	173707219	NC_005104.4	+	2020	19905769..19907788	108350926		LOC108350926
LOC108350929	0.001	0.004	0.056	0.001	4.42188	4.42188	58.9597	1	Z-010891	LOC108350929	gene		D:\assemblies\Rattus_norvegicus-Rnor_6.0-dbSNP149\Rattus_norvegicus-Rnor_6.0-dbSNP149.genometemplate\sequences\NC_005104_chr5.gbk#0	173707219	NC_005104.4	-	18938	21887949..21869012	108350929		LOC108350929
Gdf6	0.001	0.001	0.097	0.001	1	1	102.959	1	Z-010900	Gdf6	gene		D:\assemblies\Rattus_norvegicus-Rnor_6.0-dbSNP149\Rattus_norvegicus-Rnor_6.0-dbSNP149.genometemplate\sequences\NC_005104_chr5.gbk#0	173707219	NC_005104.4	+	16322	23056345..23072666	252834, 620104		Gdf6	BMP-13, gdf16
Ints8	3.524	5.575	28.383	5.125	1.58211	1.08778	5.53795	0.687554	Z-010923	Ints8	gene		D:\assemblies\Rattus_norvegicus-Rnor_6.0-dbSNP149\Rattus_norvegicus-Rnor_6.0-dbSNP149.genometemplate\sequences\NC_005104_chr5.gbk#0	173707219	NC_005104.4	-	47818	24493819..24446002	297823, 1310592		Ints8
Slc26a7	0.01	0.31	0.001	0.249	30.6047	1.24508	0.00379629	0.0406826	Z-010949	Slc26a7	gene		D:\assemblies\Rattus_norvegicus-Rnor_6.0-dbSNP149\Rattus_norvegicus-Rnor_6.0-dbSNP149.genometemplate\sequences\NC_005104_chr5.gbk#0	173707219	NC_005104.4	-	144639	28131294..27986656	297910, 1310846		Slc26a7
LOC100912373	2.368	5.901	0.001	1.221	2.49165	4.83451	0.000774361	1.94028	Z-010954	LOC100912373	gene		D:\assemblies\Rattus_norvegicus-Rnor_6.0-dbSNP149\Rattus_norvegicus-Rnor_6.0-dbSNP149.genometemplate\sequences\NC_005104_chr5.gbk#0	173707219	NC_005104.4	+	25402	28480029..28505430	100912373, 6487307		LOC100912373
LOC100909929	1.278	3.124	0.087	1.861	2.44487	1.67858	0.0468804	0.686573	Z-010971	LOC100909929	gene		D:\assemblies\Rattus_norvegicus-Rnor_6.0-dbSNP149\Rattus_norvegicus-Rnor_6.0-dbSNP149.genometemplate\sequences\NC_005104_chr5.gbk#0	173707219	NC_005104.4	+	5087	33387154..33392240	100909929, 6500944		LOC100909929
Wwp1	4.406	7.318	0.805	6.669	1.66106	1.09729	0.120765	0.660595	Z-010975	Wwp1	gene		D:\assemblies\Rattus_norvegicus-Rnor_6.0-dbSNP149\Rattus_norvegicus-Rnor_6.0-dbSNP149.genometemplate\sequences\NC_005104_chr5.gbk#0	173707219	NC_005104.4	-	87999	33696487..33608489	297930, 1311734		Wwp1
LOC108350939	0.001	0.001	0.085	0.001	1	1	90.0355	1	Z-010976	LOC108350939	gene		D:\assemblies\Rattus_norvegicus-Rnor_6.0-dbSNP149\Rattus_norvegicus-Rnor_6.0-dbSNP149.genometemplate\sequences\NC_005104_chr5.gbk#0	173707219	NC_005104.4	+	10752	33627921..33638672	108350939		LOC108350939
Atp6v0d2	0.735	0.119	0.001	0.305	0.162287	0.391082	0.00310039	2.40981	Z-010978	Atp6v0d2	gene		D:\assemblies\Rattus_norvegicus-Rnor_6.0-dbSNP149\Rattus_norvegicus-Rnor_6.0-dbSNP149.genometemplate\sequences\NC_005104_chr5.gbk#0	173707219	NC_005104.4	-	48856	33892446..33843591	297932, 1306900		Atp6v0d2
Ttpa	0.736	0.179	0.001	1.731	0.243398	0.103509	0.00054585	0.425268	Z-010979	Ttpa	gene		D:\assemblies\Rattus_norvegicus-Rnor_6.0-dbSNP149\Rattus_norvegicus-Rnor_6.0-dbSNP149.genometemplate\sequences\NC_005104_chr5.gbk#0	173707219	NC_005104.4	+	21390	34007926..34029315	25571, 3915		Ttpa	TTP
Ggh	9.715	15.625	2.164	10.575	1.60841	1.47762	0.204674	0.918684	Z-010980	Ggh	gene		D:\assemblies\Rattus_norvegicus-Rnor_6.0-dbSNP149\Rattus_norvegicus-Rnor_6.0-dbSNP149.genometemplate\sequences\NC_005104_chr5.gbk#0	173707219	NC_005104.4	+	23112	34040258..34063369	25455, 2682		Ggh
Pnisr	2.665	3.612	47.257	2.882	1.35529	1.25337	16.396	0.924797	Z-010986	Pnisr	gene		D:\assemblies\Rattus_norvegicus-Rnor_6.0-dbSNP149\Rattus_norvegicus-Rnor_6.0-dbSNP149.genometemplate\sequences\NC_005104_chr5.gbk#0	173707219	NC_005104.4	+	26925	35991028..36017952	297942, 1307395		Pnisr	RGD1307395, Sfrs18, Srsf18
Mms22l	1.999	5.35	0.807	3.579	2.67566	1.49495	0.225452	0.558721	Z-010993	Mms22l	gene		D:\assemblies\Rattus_norvegicus-Rnor_6.0-dbSNP149\Rattus_norvegicus-Rnor_6.0-dbSNP149.genometemplate\sequences\NC_005104_chr5.gbk#0	173707219	NC_005104.4	+	116488	38844502..38960989	313108, 1304693		Mms22l	RGD1304693
LOC108350946	0.005	0.027	0.022	0.001	5.18609	28.6601	23.3163	5.52635	Z-011017	LOC108350946	gene		D:\assemblies\Rattus_norvegicus-Rnor_6.0-dbSNP149\Rattus_norvegicus-Rnor_6.0-dbSNP149.genometemplate\sequences\NC_005104_chr5.gbk#0	173707219	NC_005104.4	-	7771	47528784..47521014	108350946		LOC108350946
LOC102556064	0.001	0.003	0.093	0.001	2.9957	2.9957	98.6901	1	Z-011034	LOC102556064	gene		D:\assemblies\Rattus_norvegicus-Rnor_6.0-dbSNP149\Rattus_norvegicus-Rnor_6.0-dbSNP149.genometemplate\sequences\NC_005104_chr5.gbk#0	173707219	NC_005104.4	-	7338	48516651..48509314	102556064, 7544320		LOC102556064
Rars2	1.459	2.652	3.794	0.868	1.81713	3.05567	4.37125	1.68159	Z-011049	Rars2	gene		D:\assemblies\Rattus_norvegicus-Rnor_6.0-dbSNP149\Rattus_norvegicus-Rnor_6.0-dbSNP149.genometemplate\sequences\NC_005104_chr5.gbk#0	173707219	NC_005104.4	+	52116	50075510..50127625	297969, 1305419		Rars2	Rarsl
RGD1563056	0.001	0.001	0.503	0.001	1	1	531.819	1	Z-011052	RGD1563056	gene		D:\assemblies\Rattus_norvegicus-Rnor_6.0-dbSNP149\Rattus_norvegicus-Rnor_6.0-dbSNP149.genometemplate\sequences\NC_005104_chr5.gbk#0	173707219	NC_005104.4	-	11258	50221560..50210303	500434, 1563056		RGD1563056
LOC102552818	3.408	10.606	19.956	3.752	3.11242	2.82688	5.319	0.90826	Z-011077	LOC102552818	gene		D:\assemblies\Rattus_norvegicus-Rnor_6.0-dbSNP149\Rattus_norvegicus-Rnor_6.0-dbSNP149.genometemplate\sequences\NC_005104_chr5.gbk#0	173707219	NC_005104.4	+	1634	56565237..56566870	102552818, 7573721		LOC102552818
LOC690918	0.001	0.001	0.374	0.001	1	1	395.257	1	Z-011079	LOC690918	gene		D:\assemblies\Rattus_norvegicus-Rnor_6.0-dbSNP149\Rattus_norvegicus-Rnor_6.0-dbSNP149.genometemplate\sequences\NC_005104_chr5.gbk#0	173707219	NC_005104.4	+	3258	56797502..56800759	690918, 1589861		LOC690918
Aqp3	0.776	1.535	0.001	0.88	1.97831	1.74428	0.00107383	0.881702	Z-011091	Aqp3	gene		D:\assemblies\Rattus_norvegicus-Rnor_6.0-dbSNP149\Rattus_norvegicus-Rnor_6.0-dbSNP149.genometemplate\sequences\NC_005104_chr5.gbk#0	173707219	NC_005104.4	-	5518	57429252..57423735	65133, 68428		Aqp3
Enho	0.645	0.013	0.001	0.91	0.0205411	0.0145501	0.00103809	0.708342	Z-011105	Enho	gene		D:\assemblies\Rattus_norvegicus-Rnor_6.0-dbSNP149\Rattus_norvegicus-Rnor_6.0-dbSNP149.genometemplate\sequences\NC_005104_chr5.gbk#0	173707219	NC_005104.4	-	1798	58019836..58018039	100912292, 6487582		Enho	RGD1565232
Sigmar1	1.74	3.945	9.007	2.148	2.26696	1.83632	4.19225	0.810035	Z-011112	Sigmar1	gene		D:\assemblies\Rattus_norvegicus-Rnor_6.0-dbSNP149\Rattus_norvegicus-Rnor_6.0-dbSNP149.genometemplate\sequences\NC_005104_chr5.gbk#0	173707219	NC_005104.4	-	2864	58124687..58121824	29336, 68364		Sigmar1	Oprs1
Galt	3.288	7.946	18.925	3.292	2.41656	2.41352	5.74836	0.99874	Z-011113	Galt	gene		D:\assemblies\Rattus_norvegicus-Rnor_6.0-dbSNP149\Rattus_norvegicus-Rnor_6.0-dbSNP149.genometemplate\sequences\NC_005104_chr5.gbk#0	173707219	NC_005104.4	+	3268	58144679..58147946	298003, 1306483		Galt
Ccl27	0.001	0.01	1.168	0.001	11.0962	11.0962	1235.7	1	Z-011115	Ccl27	gene		D:\assemblies\Rattus_norvegicus-Rnor_6.0-dbSNP149\Rattus_norvegicus-Rnor_6.0-dbSNP149.genometemplate\sequences\NC_005104_chr5.gbk#0	173707219	NC_005104.4	-	7117	58166182..58159066	362505, 1304660		Ccl27
Ccl19	0.001	0.009	308.114	0.001	9.90778	9.90778	326002	1	Z-011117	Ccl19	gene		D:\assemblies\Rattus_norvegicus-Rnor_6.0-dbSNP149\Rattus_norvegicus-Rnor_6.0-dbSNP149.genometemplate\sequences\NC_005104_chr5.gbk#0	173707219	NC_005104.4	-	1945	58182969..58181025	362506, 1310336		Ccl19
Ccl21	2.447	0.091	1731.24	0.634	0.037153	0.143464	2731.64	3.86143	Z-011118	Ccl21	gene		D:\assemblies\Rattus_norvegicus-Rnor_6.0-dbSNP149\Rattus_norvegicus-Rnor_6.0-dbSNP149.genometemplate\sequences\NC_005104_chr5.gbk#0	173707219	NC_005104.4	-	1105	58198782..58197678	298006, 1311996		Ccl21	Ccl21b
LOC100360779	0.001	0.001	0.096	0.001	1	1	101.309	1	Z-011119	LOC100360779	gene		D:\assemblies\Rattus_norvegicus-Rnor_6.0-dbSNP149\Rattus_norvegicus-Rnor_6.0-dbSNP149.genometemplate\sequences\NC_005104_chr5.gbk#0	173707219	NC_005104.4	-	8586	58222643..58214058	100360779, 2321479		LOC100360779
Pigo	0.236	0.353	1.782	0.266	1.49924	1.32994	6.70406	0.88708	Z-011127	Pigo	gene		D:\assemblies\Rattus_norvegicus-Rnor_6.0-dbSNP149\Rattus_norvegicus-Rnor_6.0-dbSNP149.genometemplate\sequences\NC_005104_chr5.gbk#0	173707219	NC_005104.4	-	9645	58470699..58461055	313341, 1309498		Pigo
Fam214b	6.104	9.284	0.261	7.356	1.52113	1.26214	0.0354802	0.829742	Z-011129	Fam214b	gene		D:\assemblies\Rattus_norvegicus-Rnor_6.0-dbSNP149\Rattus_norvegicus-Rnor_6.0-dbSNP149.genometemplate\sequences\NC_005104_chr5.gbk#0	173707219	NC_005104.4	-	7007	58484900..58477894	298201, 1311249		Fam214b	RGD1311249
Unc13b	0.537	0.08	0.139	0.746	0.14951	0.107513	0.186715	0.719104	Z-011130	Unc13b	gene		D:\assemblies\Rattus_norvegicus-Rnor_6.0-dbSNP149\Rattus_norvegicus-Rnor_6.0-dbSNP149.genometemplate\sequences\NC_005104_chr5.gbk#0	173707219	NC_005104.4	+	208948	58505449..58714396	64830, 619723		Unc13b	Munc13-2, Unc13h2
Cd72	2.521	1.603	39.164	1.159	0.635699	1.38331	33.8005	2.17605	Z-011137	Cd72	gene		D:\assemblies\Rattus_norvegicus-Rnor_6.0-dbSNP149\Rattus_norvegicus-Rnor_6.0-dbSNP149.genometemplate\sequences\NC_005104_chr5.gbk#0	173707219	NC_005104.4	-	7353	58950373..58943021	313498, 1309757		Cd72
Ccdc107	4.754	6.559	46.951	4.245	1.37955	1.54485	11.0591	1.11982	Z-011140	Ccdc107	gene		D:\assemblies\Rattus_norvegicus-Rnor_6.0-dbSNP149\Rattus_norvegicus-Rnor_6.0-dbSNP149.genometemplate\sequences\NC_005104_chr5.gbk#0	173707219	NC_005104.4	+	3410	58995211..58998620	313496, 1560252		Ccdc107
Rgp1	1.715	3.504	0.485	3.047	2.0425	1.14976	0.159013	0.562918	Z-011147	Rgp1	gene		D:\assemblies\Rattus_norvegicus-Rnor_6.0-dbSNP149\Rattus_norvegicus-Rnor_6.0-dbSNP149.genometemplate\sequences\NC_005104_chr5.gbk#0	173707219	NC_005104.4	+	8488	59080290..59088777	313493, 1311757		Rgp1
Spag8	0.001	0.001	5.053	0.001	1	1	5346.1	1	Z-011151	Spag8	gene		D:\assemblies\Rattus_norvegicus-Rnor_6.0-dbSNP149\Rattus_norvegicus-Rnor_6.0-dbSNP149.genometemplate\sequences\NC_005104_chr5.gbk#0	173707219	NC_005104.4	-	2214	59149625..59147412	362508, 1307079		Spag8
Zcchc7	1.662	4.422	28.526	2.41	2.66088	1.83457	11.8354	0.689461	Z-011172	Zcchc7	gene		D:\assemblies\Rattus_norvegicus-Rnor_6.0-dbSNP149\Rattus_norvegicus-Rnor_6.0-dbSNP149.genometemplate\sequences\NC_005104_chr5.gbk#0	173707219	NC_005104.4	+	179574	60250546..60430119	298086, 1310467		Zcchc7
Polr1e	1.981	2.38	22.596	1.403	1.20122	1.696	16.1038	1.4119	Z-011175	Polr1e	gene		D:\assemblies\Rattus_norvegicus-Rnor_6.0-dbSNP149\Rattus_norvegicus-Rnor_6.0-dbSNP149.genometemplate\sequences\NC_005104_chr5.gbk#0	173707219	NC_005104.4	+	15525	60572573..60588097	313245, 1565773		Polr1e	Praf1, RGD1565773
Igfbpl1	0.001	0.001	0.296	0.001	1	1	312.735	1	Z-011189	Igfbpl1	gene		D:\assemblies\Rattus_norvegicus-Rnor_6.0-dbSNP149\Rattus_norvegicus-Rnor_6.0-dbSNP149.genometemplate\sequences\NC_005104_chr5.gbk#0	173707219	NC_005104.4	-	15406	61410812..61395407	366366, 1305656		Igfbpl1
Tmod1	1.878	4.191	0.122	3.63	2.23195	1.15447	0.0337292	0.517245	Z-011194	Tmod1	gene		D:\assemblies\Rattus_norvegicus-Rnor_6.0-dbSNP149\Rattus_norvegicus-Rnor_6.0-dbSNP149.genometemplate\sequences\NC_005104_chr5.gbk#0	173707219	NC_005104.4	+	76809	61635244..61712052	25566, 3874		Tmod1	E-Tmod, Tmod
Xpa	1.872	2.922	35.356	5.681	1.56075	0.514247	6.22332	0.329487	Z-011197	Xpa	gene		D:\assemblies\Rattus_norvegicus-Rnor_6.0-dbSNP149\Rattus_norvegicus-Rnor_6.0-dbSNP149.genometemplate\sequences\NC_005104_chr5.gbk#0	173707219	NC_005104.4	-	43875	61793641..61749767	298074, 1308769		Xpa
Hemgn	35.861	64.394	0.003	43.408	1.79564	1.48346	7.68916e-05	0.826143	Z-011201	Hemgn	gene		D:\assemblies\Rattus_norvegicus-Rnor_6.0-dbSNP149\Rattus_norvegicus-Rnor_6.0-dbSNP149.genometemplate\sequences\NC_005104_chr5.gbk#0	173707219	NC_005104.4	-	20805	62025075..62004271	113882, 621569		Hemgn	Edag-1, Edag1, Hgn, RP59
Coro2a	0.084	0.074	0.149	0.717	0.878614	0.102677	0.207733	0.116863	Z-011205	Coro2a	gene		D:\assemblies\Rattus_norvegicus-Rnor_6.0-dbSNP149\Rattus_norvegicus-Rnor_6.0-dbSNP149.genometemplate\sequences\NC_005104_chr5.gbk#0	173707219	NC_005104.4	-	56272	62210797..62154526	313235, 1309719		Coro2a
Erp44	7.413	9.524	45.191	8.385	1.28482	1.13589	5.38952	0.884085	Z-011221	Erp44	gene		D:\assemblies\Rattus_norvegicus-Rnor_6.0-dbSNP149\Rattus_norvegicus-Rnor_6.0-dbSNP149.genometemplate\sequences\NC_005104_chr5.gbk#0	173707219	NC_005104.4	-	92962	64030827..63937866	298066, 1309176		Erp44	BWK4, Txndc4
LOC108350966	0.004	0.005	0.206	0.001	1.29706	5.09563	217.554	3.92861	Z-011226	LOC108350966	gene		D:\assemblies\Rattus_norvegicus-Rnor_6.0-dbSNP149\Rattus_norvegicus-Rnor_6.0-dbSNP149.genometemplate\sequences\NC_005104_chr5.gbk#0	173707219	NC_005104.4	-	10591	64238224..64227634	108350966		LOC108350966
Msantd3	1.326	0.3	0.402	3.382	0.226676	0.0888443	0.118989	0.391944	Z-011227	Msantd3	gene		D:\assemblies\Rattus_norvegicus-Rnor_6.0-dbSNP149\Rattus_norvegicus-Rnor_6.0-dbSNP149.genometemplate\sequences\NC_005104_chr5.gbk#0	173707219	NC_005104.4	+	26256	64282351..64308606	362516, 1308165		Msantd3	RGD1308165
Zfp189	1.515	0.221	0.419	1.844	0.146164	0.120025	0.227079	0.821171	Z-011239	Zfp189	gene		D:\assemblies\Rattus_norvegicus-Rnor_6.0-dbSNP149\Rattus_norvegicus-Rnor_6.0-dbSNP149.genometemplate\sequences\NC_005104_chr5.gbk#0	173707219	NC_005104.4	+	11648	64789432..64801079	313219, 1306510		Zfp189
LOC102555188	0.003	0.005	0.039	0.001	1.72718	5.72655	41.7266	3.31554	Z-011241	LOC102555188	gene		D:\assemblies\Rattus_norvegicus-Rnor_6.0-dbSNP149\Rattus_norvegicus-Rnor_6.0-dbSNP149.genometemplate\sequences\NC_005104_chr5.gbk#0	173707219	NC_005104.4	+	22821	64817052..64839872	102555188, 7726668		LOC102555188
Smc2	3.177	5.068	0.545	4.297	1.59497	1.1794	0.126923	0.73945	Z-011255	Smc2	gene		D:\assemblies\Rattus_norvegicus-Rnor_6.0-dbSNP149\Rattus_norvegicus-Rnor_6.0-dbSNP149.genometemplate\sequences\NC_005104_chr5.gbk#0	173707219	NC_005104.4	+	46572	68717509..68764080	362519, 1305227		Smc2	CAP-E, CAPE, Smc2l1
Slc44a1	3.138	5.491	0.442	3.416	1.74989	1.6074	0.129519	0.918572	Z-011274	Slc44a1	gene		D:\assemblies\Rattus_norvegicus-Rnor_6.0-dbSNP149\Rattus_norvegicus-Rnor_6.0-dbSNP149.genometemplate\sequences\NC_005104_chr5.gbk#0	173707219	NC_005104.4	+	180473	70243643..70424115	85254, 621426		Slc44a1	Cdw92, Ctl1
Fsd1l	0.007	0.63	0.001	0.297	86.6775	2.12511	0.00318687	0.0245174	Z-011276	Fsd1l	gene		D:\assemblies\Rattus_norvegicus-Rnor_6.0-dbSNP149\Rattus_norvegicus-Rnor_6.0-dbSNP149.genometemplate\sequences\NC_005104_chr5.gbk#0	173707219	NC_005104.4	+	76057	70441075..70517131	313208, 1564809		Fsd1l
LOC108350976	0.004	0.451	0.042	0.001	117.063	477.264	44.6035	4.07698	Z-011284	LOC108350976	gene		D:\assemblies\Rattus_norvegicus-Rnor_6.0-dbSNP149\Rattus_norvegicus-Rnor_6.0-dbSNP149.genometemplate\sequences\NC_005104_chr5.gbk#0	173707219	NC_005104.4	+	42743	71433444..71476186	108350976		LOC108350976
Ctnnal1	6.428	6.536	1.938	9.563	1.01685	0.683503	0.20262	0.672177	Z-011296	Ctnnal1	gene		D:\assemblies\Rattus_norvegicus-Rnor_6.0-dbSNP149\Rattus_norvegicus-Rnor_6.0-dbSNP149.genometemplate\sequences\NC_005104_chr5.gbk#0	173707219	NC_005104.4	-	59822	73621070..73561249	298019, 1311434		Ctnnal1	Catnal1
Epb41l4b	3.436	3.521	0.004	5.358	1.02469	0.657091	0.000675459	0.641261	Z-011301	Epb41l4b	gene		D:\assemblies\Rattus_norvegicus-Rnor_6.0-dbSNP149\Rattus_norvegicus-Rnor_6.0-dbSNP149.genometemplate\sequences\NC_005104_chr5.gbk#0	173707219	NC_005104.4	-	161326	74192275..74030950	500464, 1562988		Epb41l4b	RGD1562988
Palm2	0.032	0.012	0.001	0.493	0.371461	0.0240124	0.00191601	0.064643	Z-011307	Palm2	gene		D:\assemblies\Rattus_norvegicus-Rnor_6.0-dbSNP149\Rattus_norvegicus-Rnor_6.0-dbSNP149.genometemplate\sequences\NC_005104_chr5.gbk#0	173707219	NC_005104.4	+	138300	74649765..74788064	103692368, 6497336		Palm2
LOC103692362	0.008	0.012	3.682	0.001	1.45226	12.4592	3896	8.57916	Z-011314	LOC103692362	gene		D:\assemblies\Rattus_norvegicus-Rnor_6.0-dbSNP149\Rattus_norvegicus-Rnor_6.0-dbSNP149.genometemplate\sequences\NC_005104_chr5.gbk#0	173707219	NC_005104.4	-	1257	75144774..75143518	103692362, 9130195		LOC103692362
Gng10	60.771	147.083	12.8	75.113	2.42026	1.95816	0.170416	0.809069	Z-011325	Gng10	gene		D:\assemblies\Rattus_norvegicus-Rnor_6.0-dbSNP149\Rattus_norvegicus-Rnor_6.0-dbSNP149.genometemplate\sequences\NC_005104_chr5.gbk#0	173707219	NC_005104.4	+	6915	76182100..76189014	114119, 621514		Gng10
LOC686050	0.003	0.006	0.028	0.001	1.88169	6.67369	29.2331	3.54665	Z-011326	LOC686050	gene		D:\assemblies\Rattus_norvegicus-Rnor_6.0-dbSNP149\Rattus_norvegicus-Rnor_6.0-dbSNP149.genometemplate\sequences\NC_005104_chr5.gbk#0	173707219	NC_005104.4	-	108238	76298723..76190486	686050, 1586646		LOC686050
LOC103689928	0.009	0.008	0.001	0.175	0.935856	0.0457035	0.00540145	0.048836	Z-011347	LOC103689928	gene		D:\assemblies\Rattus_norvegicus-Rnor_6.0-dbSNP149\Rattus_norvegicus-Rnor_6.0-dbSNP149.genometemplate\sequences\NC_005104_chr5.gbk#0	173707219	NC_005104.4	-	618	77475541..77474924	103689928, 9199040		LOC103689928
Alad	42.202	112.487	6.043	56.827	2.66544	1.97945	0.106348	0.742636	Z-011366	Alad	gene		D:\assemblies\Rattus_norvegicus-Rnor_6.0-dbSNP149\Rattus_norvegicus-Rnor_6.0-dbSNP149.genometemplate\sequences\NC_005104_chr5.gbk#0	173707219	NC_005104.4	-	10340	78379206..78368867	25374, 2083		Alad	ALADR, aminolevulinatedelta-dehydratase
Orm1	1.887	3.79	0.001	2.697	2.00827	1.4054	0.000350429	0.699807	Z-011376	Orm1	gene		D:\assemblies\Rattus_norvegicus-Rnor_6.0-dbSNP149\Rattus_norvegicus-Rnor_6.0-dbSNP149.genometemplate\sequences\NC_005104_chr5.gbk#0	173707219	NC_005104.4	+	3153	79179668..79182820	24614, 67390		Orm1	AGP, Agpa1, OMD, Orm
LOC103692377	0.001	0.001	0.38	0.001	1	1	401.752	1	Z-011386	LOC103692377	gene		D:\assemblies\Rattus_norvegicus-Rnor_6.0-dbSNP149\Rattus_norvegicus-Rnor_6.0-dbSNP149.genometemplate\sequences\NC_005104_chr5.gbk#0	173707219	NC_005104.4	+	55576	79922422..79977997	103692377, 9234855		LOC103692377
RGD1306186	0.006	0.006	0.001	0.185	0.969782	0.0335147	0.00511559	0.0345589	Z-011434	RGD1306186	gene		D:\assemblies\Rattus_norvegicus-Rnor_6.0-dbSNP149\Rattus_norvegicus-Rnor_6.0-dbSNP149.genometemplate\sequences\NC_005104_chr5.gbk#0	173707219	NC_005104.4	+	7067	99172904..99179970	298621, 1306186		RGD1306186
Rps6	340.967	823.065	2158.28	424.68	2.41391	1.93808	5.08212	0.80288	Z-011470	Rps6	gene		D:\assemblies\Rattus_norvegicus-Rnor_6.0-dbSNP149\Rattus_norvegicus-Rnor_6.0-dbSNP149.genometemplate\sequences\NC_005104_chr5.gbk#0	173707219	NC_005104.4	-	2861	105200681..105197821	29304, 3602		Rps6
LOC102555797	0.49	1.34	6.163	0.795	2.73585	1.68524	7.74875	0.615983	Z-011471	LOC102555797	gene		D:\assemblies\Rattus_norvegicus-Rnor_6.0-dbSNP149\Rattus_norvegicus-Rnor_6.0-dbSNP149.genometemplate\sequences\NC_005104_chr5.gbk#0	173707219	NC_005104.4	+	3450	105204210..105207659	102555797, 7556518		LOC102555797
LOC100911372	340.967	823.065	2158.28	424.68	2.41391	1.93808	5.08212	0.80288	Z-011472	LOC100911372	gene		D:\assemblies\Rattus_norvegicus-Rnor_6.0-dbSNP149\Rattus_norvegicus-Rnor_6.0-dbSNP149.genometemplate\sequences\NC_005104_chr5.gbk#0	173707219	NC_005104.4	-	2948	105212791..105209844	100911372, 6493116		LOC100911372
Mllt3	0.825	2.808	6.292	1.2	3.40456	2.34043	5.24437	0.68744	Z-011477	Mllt3	gene		D:\assemblies\Rattus_norvegicus-Rnor_6.0-dbSNP149\Rattus_norvegicus-Rnor_6.0-dbSNP149.genometemplate\sequences\NC_005104_chr5.gbk#0	173707219	NC_005104.4	-	99062	106202559..106103498	114510, 620940		Mllt3	Af-9, Af9
Ifna5	0.001	0.001	0.001	0.223	1	0.00422898	0.00422898	0.00422898	Z-011485	Ifna5	gene		D:\assemblies\Rattus_norvegicus-Rnor_6.0-dbSNP149\Rattus_norvegicus-Rnor_6.0-dbSNP149.genometemplate\sequences\NC_005104_chr5.gbk#0	173707219	NC_005104.4	+	1087	106951822..106952908	690894, 1306135		Ifna5
Klhl9	3.472	5.16	0.922	6.51	1.4864	0.792587	0.141626	0.533225	Z-011495	Klhl9	gene		D:\assemblies\Rattus_norvegicus-Rnor_6.0-dbSNP149\Rattus_norvegicus-Rnor_6.0-dbSNP149.genometemplate\sequences\NC_005104_chr5.gbk#0	173707219	NC_005104.4	+	4185	107323258..107327442	313348, 1304814		Klhl9	RGD1304814
Tek	1.899	3.449	0.459	2.415	1.81566	1.42807	0.190169	0.786533	Z-011533	Tek	gene		D:\assemblies\Rattus_norvegicus-Rnor_6.0-dbSNP149\Rattus_norvegicus-Rnor_6.0-dbSNP149.genometemplate\sequences\NC_005104_chr5.gbk#0	173707219	NC_005104.4	+	127083	113725717..113852799	89804, 620980		Tek	Tie-2, Tie2
LOC108351136	0.001	0.001	0.208	0.001	1	1	219.912	1	Z-011537	LOC108351136	gene		D:\assemblies\Rattus_norvegicus-Rnor_6.0-dbSNP149\Rattus_norvegicus-Rnor_6.0-dbSNP149.genometemplate\sequences\NC_005104_chr5.gbk#0	173707219	NC_005104.4	-	1401	113985625..113984225	108351136		LOC108351136
LOC100911221	0.053	0.124	0.421	0.043	2.31876	2.8478	9.71226	1.22815	Z-011539	LOC100911221	gene		D:\assemblies\Rattus_norvegicus-Rnor_6.0-dbSNP149\Rattus_norvegicus-Rnor_6.0-dbSNP149.genometemplate\sequences\NC_005104_chr5.gbk#0	173707219	NC_005104.4	+	51672	114014532..114066203	100911221, 6494360		LOC100911221
Nfia	3.55	4.217	0.772	6.484	1.18772	0.650312	0.119079	0.54753	Z-011551	Nfia	gene		D:\assemblies\Rattus_norvegicus-Rnor_6.0-dbSNP149\Rattus_norvegicus-Rnor_6.0-dbSNP149.genometemplate\sequences\NC_005104_chr5.gbk#0	173707219	NC_005104.4	+	328487	116421895..116750381	25492, 3170		Nfia
Kank4	2.013	1.935	0.087	2.548	0.961106	0.759121	0.0341067	0.789841	Z-011557	Kank4	gene		D:\assemblies\Rattus_norvegicus-Rnor_6.0-dbSNP149\Rattus_norvegicus-Rnor_6.0-dbSNP149.genometemplate\sequences\NC_005104_chr5.gbk#0	173707219	NC_005104.4	-	64219	117440643..117376425	313385, 1307635		Kank4	BC060737
Lepr	4.192	4.806	0.756	5.233	1.14638	0.918267	0.144492	0.801013	Z-011587	Lepr	gene		D:\assemblies\Rattus_norvegicus-Rnor_6.0-dbSNP149\Rattus_norvegicus-Rnor_6.0-dbSNP149.genometemplate\sequences\NC_005104_chr5.gbk#0	173707219	NC_005104.4	+	178807	120503475..120682281	24536, 3001		Lepr	Fa
LOC102552337	0.001	0.004	0.233	0.001	4.69887	4.69887	246.727	1	Z-011590	LOC102552337	gene		D:\assemblies\Rattus_norvegicus-Rnor_6.0-dbSNP149\Rattus_norvegicus-Rnor_6.0-dbSNP149.genometemplate\sequences\NC_005104_chr5.gbk#0	173707219	NC_005104.4	-	1135	121454003..121452869	102552337, 7559665		LOC102552337
LOC103692427	0.004	0.031	1.265	0.001	8.03341	33.3025	1338.68	4.1455	Z-011593	LOC103692427	gene		D:\assemblies\Rattus_norvegicus-Rnor_6.0-dbSNP149\Rattus_norvegicus-Rnor_6.0-dbSNP149.genometemplate\sequences\NC_005104_chr5.gbk#0	173707219	NC_005104.4	-	49320	122099026..122049707	103692427, 9264036		LOC103692427
Plpp3	5.457	8	0.224	5.782	1.46599	1.38359	0.0386629	0.943791	Z-011613	Plpp3	gene		D:\assemblies\Rattus_norvegicus-Rnor_6.0-dbSNP149\Rattus_norvegicus-Rnor_6.0-dbSNP149.genometemplate\sequences\NC_005104_chr5.gbk#0	173707219	NC_005104.4	+	75286	124690214..124765499	192270, 620454		Plpp3	Dri42, Ppap2b
LOC108351008	0.003	0.57	0.001	0.146	226.486	3.91351	0.00649345	0.0172793	Z-011618	LOC108351008	gene		D:\assemblies\Rattus_norvegicus-Rnor_6.0-dbSNP149\Rattus_norvegicus-Rnor_6.0-dbSNP149.genometemplate\sequences\NC_005104_chr5.gbk#0	173707219	NC_005104.4	+	25972	125197590..125223561	108351008		LOC108351008
Ldlrad1	0.001	0.01	0.38	0.001	10.1906	10.1906	401.664	1	Z-011645	Ldlrad1	gene		D:\assemblies\Rattus_norvegicus-Rnor_6.0-dbSNP149\Rattus_norvegicus-Rnor_6.0-dbSNP149.genometemplate\sequences\NC_005104_chr5.gbk#0	173707219	NC_005104.4	+	9270	126812168..126821437	689088, 1597398		Ldlrad1
Hspb11	0.179	0.201	13.711	1.872	1.11979	0.107195	7.32552	0.0957278	Z-011647	Hspb11	gene		D:\assemblies\Rattus_norvegicus-Rnor_6.0-dbSNP149\Rattus_norvegicus-Rnor_6.0-dbSNP149.genometemplate\sequences\NC_005104_chr5.gbk#0	173707219	NC_005104.4	+	26786	126856128..126882913	685284, 1596413		Hspb11
Magoh	14.765	1.188	89.663	19.635	0.0804294	0.0604829	4.56657	0.752	Z-011656	Magoh	gene		D:\assemblies\Rattus_norvegicus-Rnor_6.0-dbSNP149\Rattus_norvegicus-Rnor_6.0-dbSNP149.genometemplate\sequences\NC_005104_chr5.gbk#0	173707219	NC_005104.4	+	7153	127480465..127487617	298385, 1305174		Magoh
LOC102554672	0.088	0.015	0.756	0.001	0.169901	15.8746	799.662	93.4347	Z-011668	LOC102554672	gene		D:\assemblies\Rattus_norvegicus-Rnor_6.0-dbSNP149\Rattus_norvegicus-Rnor_6.0-dbSNP149.genometemplate\sequences\NC_005104_chr5.gbk#0	173707219	NC_005104.4	-	531	128079561..128079031	102554672, 7738149		LOC102554672
Orc1	1.245	2.73	0.244	1.705	2.19285	1.60109	0.143362	0.730139	Z-011671	Orc1	gene		D:\assemblies\Rattus_norvegicus-Rnor_6.0-dbSNP149\Rattus_norvegicus-Rnor_6.0-dbSNP149.genometemplate\sequences\NC_005104_chr5.gbk#0	173707219	NC_005104.4	+	26251	128186651..128212901	313479, 631435		Orc1	Orc1l
Rnf11l1	31.815	73.055	2.088	39.396	2.29626	1.85436	0.0530108	0.807557	Z-011685	Rnf11l1	gene		D:\assemblies\Rattus_norvegicus-Rnor_6.0-dbSNP149\Rattus_norvegicus-Rnor_6.0-dbSNP149.genometemplate\sequences\NC_005104_chr5.gbk#0	173707219	NC_005104.4	-	21203	129113132..129091930	100364162, 2321596		Rnf11l1	Rnf11
Dmrta2	0.831	0.141	0.001	0.925	0.169871	0.152742	0.00102216	0.899166	Z-011692	Dmrta2	gene		D:\assemblies\Rattus_norvegicus-Rnor_6.0-dbSNP149\Rattus_norvegicus-Rnor_6.0-dbSNP149.genometemplate\sequences\NC_005104_chr5.gbk#0	173707219	NC_005104.4	+	5751	129754295..129760045	313471, 1308173		Dmrta2
Bend5	0.382	0.671	17.724	0.517	1.7572	1.29836	34.3022	0.738879	Z-011696	Bend5	gene		D:\assemblies\Rattus_norvegicus-Rnor_6.0-dbSNP149\Rattus_norvegicus-Rnor_6.0-dbSNP149.genometemplate\sequences\NC_005104_chr5.gbk#0	173707219	NC_005104.4	+	55209	131257127..131312335	362564, 1584958		Bend5
Skint1	0.001	0.001	0.125	0.001	1	1	132.272	1	Z-011703	Skint1	gene		D:\assemblies\Rattus_norvegicus-Rnor_6.0-dbSNP149\Rattus_norvegicus-Rnor_6.0-dbSNP149.genometemplate\sequences\NC_005104_chr5.gbk#0	173707219	NC_005104.4	+	29577	131915266..131944842	689801, 1587579		Skint1
Trabd2b	0.069	1.404	0.001	0.906	20.222	1.54906	0.00104271	0.076603	Z-011713	Trabd2b	gene		D:\assemblies\Rattus_norvegicus-Rnor_6.0-dbSNP149\Rattus_norvegicus-Rnor_6.0-dbSNP149.genometemplate\sequences\NC_005104_chr5.gbk#0	173707219	NC_005104.4	+	216166	133220986..133437151	689914, 1586386		Trabd2b
Foxd2	0.048	0.04	0.001	0.247	0.823221	0.160768	0.00381959	0.195291	Z-011716	Foxd2	gene		D:\assemblies\Rattus_norvegicus-Rnor_6.0-dbSNP149\Rattus_norvegicus-Rnor_6.0-dbSNP149.genometemplate\sequences\NC_005104_chr5.gbk#0	173707219	NC_005104.4	-	2993	133710186..133707194	313504, 1304642		Foxd2
Cmpk1	31.224	89.203	8.692	42.877	2.85689	2.08046	0.202733	0.728225	Z-011719	Cmpk1	gene		D:\assemblies\Rattus_norvegicus-Rnor_6.0-dbSNP149\Rattus_norvegicus-Rnor_6.0-dbSNP149.genometemplate\sequences\NC_005104_chr5.gbk#0	173707219	NC_005104.4	-	26731	133786452..133759722	298410, 1310116		Cmpk1	CK, Cmpk, RGD1310116
Faah	0.073	0.007	7.395	0.001	0.0950109	7.30484	7824.46	76.8842	Z-011727	Faah	gene		D:\assemblies\Rattus_norvegicus-Rnor_6.0-dbSNP149\Rattus_norvegicus-Rnor_6.0-dbSNP149.genometemplate\sequences\NC_005104_chr5.gbk#0	173707219	NC_005104.4	-	19197	134349400..134330204	29347, 61808		Faah
Mknk1	11.558	21.467	1.318	14.087	1.8573	1.52395	0.0935582	0.820518	Z-011740	Mknk1	gene		D:\assemblies\Rattus_norvegicus-Rnor_6.0-dbSNP149\Rattus_norvegicus-Rnor_6.0-dbSNP149.genometemplate\sequences\NC_005104_chr5.gbk#0	173707219	NC_005104.4	+	39036	134691852..134730887	500526, 1559603		Mknk1
LOC100911581	0.073	0.007	7.395	0.001	0.0950109	7.30484	7824.46	76.8842	Z-011743	LOC100911581	gene		D:\assemblies\Rattus_norvegicus-Rnor_6.0-dbSNP149\Rattus_norvegicus-Rnor_6.0-dbSNP149.genometemplate\sequences\NC_005104_chr5.gbk#0	173707219	NC_005104.4	-	19197	134872095..134852899	100911581, 6491947		LOC100911581
LOC100911669	0.006	0.001	0.252	0.001	0.148217	1	267.094	6.74686	Z-011751	LOC100911669	gene		D:\assemblies\Rattus_norvegicus-Rnor_6.0-dbSNP149\Rattus_norvegicus-Rnor_6.0-dbSNP149.genometemplate\sequences\NC_005104_chr5.gbk#0	173707219	NC_005104.4	+	16803	135029480..135046282	100911669, 6491750		LOC100911669
Ipp	4.509	6.144	1.274	5.67	1.36254	1.08365	0.224682	0.795314	Z-011754	Ipp	gene		D:\assemblies\Rattus_norvegicus-Rnor_6.0-dbSNP149\Rattus_norvegicus-Rnor_6.0-dbSNP149.genometemplate\sequences\NC_005104_chr5.gbk#0	173707219	NC_005104.4	+	38597	135351767..135390363	298439, 1306299		Ipp
Ccdc17	0.576	1.304	21.341	0.734	2.26438	1.77565	29.0691	0.784167	Z-011757	Ccdc17	gene		D:\assemblies\Rattus_norvegicus-Rnor_6.0-dbSNP149\Rattus_norvegicus-Rnor_6.0-dbSNP149.genometemplate\sequences\NC_005104_chr5.gbk#0	173707219	NC_005104.4	+	5519	135440276..135445794	500528, 1598211		Ccdc17
Mutyh	1.634	3.027	26.056	1.288	1.85274	2.35024	20.2298	1.26852	Z-011765	Mutyh	gene		D:\assemblies\Rattus_norvegicus-Rnor_6.0-dbSNP149\Rattus_norvegicus-Rnor_6.0-dbSNP149.genometemplate\sequences\NC_005104_chr5.gbk#0	173707219	NC_005104.4	+	12021	135663328..135675348	170841, 620045		Mutyh	Myh
Rps8	711.486	1599.16	3818.53	908.789	2.24763	1.75966	4.20178	0.782895	Z-011778	Rps8	gene		D:\assemblies\Rattus_norvegicus-Rnor_6.0-dbSNP149\Rattus_norvegicus-Rnor_6.0-dbSNP149.genometemplate\sequences\NC_005104_chr5.gbk#0	173707219	NC_005104.4	-	2571	136023511..136020941	65136, 61910		Rps8
B4galt2	3.003	3.804	0.156	2.518	1.26693	1.51098	0.0620095	1.19263	Z-011789	B4galt2	gene		D:\assemblies\Rattus_norvegicus-Rnor_6.0-dbSNP149\Rattus_norvegicus-Rnor_6.0-dbSNP149.genometemplate\sequences\NC_005104_chr5.gbk#0	173707219	NC_005104.4	-	9836	136717345..136707510	313536, 1305358		B4galt2
LOC103692460	0.047	0.005	0.645	0.001	0.10734	5.34018	682.57	49.7502	Z-011804	LOC103692460	gene		D:\assemblies\Rattus_norvegicus-Rnor_6.0-dbSNP149\Rattus_norvegicus-Rnor_6.0-dbSNP149.genometemplate\sequences\NC_005104_chr5.gbk#0	173707219	NC_005104.4	+	1170	137265071..137266240	103692460, 9354806		LOC103692460
Mpl	4.38	13.253	0.068	4.813	3.02573	2.7533	0.0141006	0.909961	Z-011805	Mpl	gene		D:\assemblies\Rattus_norvegicus-Rnor_6.0-dbSNP149\Rattus_norvegicus-Rnor_6.0-dbSNP149.genometemplate\sequences\NC_005104_chr5.gbk#0	173707219	NC_005104.4	-	13621	137282032..137268412	366455, 1311069		Mpl
Guca2b	0.001	0.001	0.824	0.001	1	1	871.782	1	Z-011857	Guca2b	gene		D:\assemblies\Rattus_norvegicus-Rnor_6.0-dbSNP149\Rattus_norvegicus-Rnor_6.0-dbSNP149.genometemplate\sequences\NC_005104_chr5.gbk#0	173707219	NC_005104.4	-	2051	138697641..138695591	64055, 620044		Guca2b
Scmh1	3.076	3.294	0.821	4.203	1.07084	0.783778	0.19527	0.731926	Z-011863	Scmh1	gene		D:\assemblies\Rattus_norvegicus-Rnor_6.0-dbSNP149\Rattus_norvegicus-Rnor_6.0-dbSNP149.genometemplate\sequences\NC_005104_chr5.gbk#0	173707219	NC_005104.4	+	87550	139379256..139466805	362581, 1305788		Scmh1
Slfnl1	0.005	0.001	0.347	0.001	0.1864	1	367.306	5.3648	Z-011864	Slfnl1	gene		D:\assemblies\Rattus_norvegicus-Rnor_6.0-dbSNP149\Rattus_norvegicus-Rnor_6.0-dbSNP149.genometemplate\sequences\NC_005104_chr5.gbk#0	173707219	NC_005104.4	+	5667	139467933..139473599	500540, 1564075		Slfnl1
Heyl	4.257	6.829	0.332	6.537	1.60425	1.04462	0.0508545	0.651155	Z-011895	Heyl	gene		D:\assemblies\Rattus_norvegicus-Rnor_6.0-dbSNP149\Rattus_norvegicus-Rnor_6.0-dbSNP149.genometemplate\sequences\NC_005104_chr5.gbk#0	173707219	NC_005104.4	+	16992	140923914..140940905	313575, 1305022		Heyl
Rragc	8.973	13.57	2.428	10.737	1.51226	1.26381	0.226089	0.835709	Z-011908	Rragc	gene		D:\assemblies\Rattus_norvegicus-Rnor_6.0-dbSNP149\Rattus_norvegicus-Rnor_6.0-dbSNP149.genometemplate\sequences\NC_005104_chr5.gbk#0	173707219	NC_005104.4	+	18249	141572536..141590784	298514, 1311760		Rragc
Fhl3	7.951	13.118	0.892	7.776	1.64979	1.687	0.114674	1.02255	Z-011919	Fhl3	gene		D:\assemblies\Rattus_norvegicus-Rnor_6.0-dbSNP149\Rattus_norvegicus-Rnor_6.0-dbSNP149.genometemplate\sequences\NC_005104_chr5.gbk#0	173707219	NC_005104.4	+	7369	142688962..142696330	313582, 1307180		Fhl3
Gnl2	2.911	5.065	54.359	3.85	1.73966	1.31567	14.1205	0.756278	Z-011933	Gnl2	gene		D:\assemblies\Rattus_norvegicus-Rnor_6.0-dbSNP149\Rattus_norvegicus-Rnor_6.0-dbSNP149.genometemplate\sequences\NC_005104_chr5.gbk#0	173707219	NC_005104.4	+	25449	143027970..143053418	362593, 1305006		Gnl2	RGD1305006
Csf3r	2.867	6.894	0.463	2.814	2.4048	2.44971	0.164574	1.01868	Z-011942	Csf3r	gene		D:\assemblies\Rattus_norvegicus-Rnor_6.0-dbSNP149\Rattus_norvegicus-Rnor_6.0-dbSNP149.genometemplate\sequences\NC_005104_chr5.gbk#0	173707219	NC_005104.4	+	20614	144031353..144051966	298518, 1309114		Csf3r
Mrps15	19.04	34.453	116.777	22.086	1.80951	1.55991	5.28731	0.862065	Z-011943	Mrps15	gene		D:\assemblies\Rattus_norvegicus-Rnor_6.0-dbSNP149\Rattus_norvegicus-Rnor_6.0-dbSNP149.genometemplate\sequences\NC_005104_chr5.gbk#0	173707219	NC_005104.4	+	10594	144054452..144065045	298517, 1359675		Mrps15
LOC100911847	654.355	2335.87	3839.83	802.392	3.56973	2.91113	4.78548	0.815505	Z-011945	LOC100911847	gene		D:\assemblies\Rattus_norvegicus-Rnor_6.0-dbSNP149\Rattus_norvegicus-Rnor_6.0-dbSNP149.genometemplate\sequences\NC_005104_chr5.gbk#0	173707219	NC_005104.4	+	573	144083030..144083602	100911847, 6490698		LOC100911847
Clspn	1.803	3.622	0.236	2.195	2.00906	1.65032	0.107749	0.821437	Z-011961	Clspn	gene		D:\assemblies\Rattus_norvegicus-Rnor_6.0-dbSNP149\Rattus_norvegicus-Rnor_6.0-dbSNP149.genometemplate\sequences\NC_005104_chr5.gbk#0	173707219	NC_005104.4	+	39838	144577670..144617507	298534, 1309083		Clspn
Zmym6	0.234	1.055	4.317	0.681	4.50158	1.54875	6.3375	0.344046	Z-011971	Zmym6	gene		D:\assemblies\Rattus_norvegicus-Rnor_6.0-dbSNP149\Rattus_norvegicus-Rnor_6.0-dbSNP149.genometemplate\sequences\NC_005104_chr5.gbk#0	173707219	NC_005104.4	+	47619	145138667..145186285	362602, 1561833		Zmym6	RGD1561833
Dlgap3	0.006	0.003	0.036	0.001	0.605583	3.5565	38.5008	5.87286	Z-011973	Dlgap3	gene		D:\assemblies\Rattus_norvegicus-Rnor_6.0-dbSNP149\Rattus_norvegicus-Rnor_6.0-dbSNP149.genometemplate\sequences\NC_005104_chr5.gbk#0	173707219	NC_005104.4	+	69780	145234757..145304536	286923, 708349		Dlgap3	DAP-3, Dap3, SAPAP3
LOC100912611	0.755	0.86	0.11	0.539	1.13908	1.59559	0.204047	1.40078	Z-011983	LOC100912611	gene		D:\assemblies\Rattus_norvegicus-Rnor_6.0-dbSNP149\Rattus_norvegicus-Rnor_6.0-dbSNP149.genometemplate\sequences\NC_005104_chr5.gbk#0	173707219	NC_005104.4	+	3556	146318373..146321928	100912611, 6486062		LOC100912611
LOC100912566	1.089	2.475	0.12	2.791	2.27376	0.886859	0.0428182	0.390042	Z-011984	LOC100912566	gene		D:\assemblies\Rattus_norvegicus-Rnor_6.0-dbSNP149\Rattus_norvegicus-Rnor_6.0-dbSNP149.genometemplate\sequences\NC_005104_chr5.gbk#0	173707219	NC_005104.4	+	21467	146320693..146342159	100912566, 6486286		LOC100912566
Tlr12	0.005	0.37	0.946	0.085	80.0041	4.35851	11.1342	0.0544786	Z-011987	Tlr12	gene		D:\assemblies\Rattus_norvegicus-Rnor_6.0-dbSNP149\Rattus_norvegicus-Rnor_6.0-dbSNP149.genometemplate\sequences\NC_005104_chr5.gbk#0	173707219	NC_005104.4	-	4215	146795919..146791705	362604, 1559145		Tlr12	RGD1559145
Zbtb8a	1.202	0.23	0.267	1.422	0.191264	0.161758	0.188055	0.845733	Z-012006	Zbtb8a	gene		D:\assemblies\Rattus_norvegicus-Rnor_6.0-dbSNP149\Rattus_norvegicus-Rnor_6.0-dbSNP149.genometemplate\sequences\NC_005104_chr5.gbk#0	173707219	NC_005104.4	-	30091	147584997..147554907	313049, 1308756		Zbtb8a	Zbtb8
Bsdc1	14.213	19.838	1.815	14.485	1.39571	1.36954	0.125296	0.981248	Z-012010	Bsdc1	gene		D:\assemblies\Rattus_norvegicus-Rnor_6.0-dbSNP149\Rattus_norvegicus-Rnor_6.0-dbSNP149.genometemplate\sequences\NC_005104_chr5.gbk#0	173707219	NC_005104.4	+	28149	147661618..147689766	297890, 1311622		Bsdc1	RGD1311622
Lck	3.783	4.861	54.237	5.123	1.28491	0.948704	10.586	0.738341	Z-012015	Lck	gene		D:\assemblies\Rattus_norvegicus-Rnor_6.0-dbSNP149\Rattus_norvegicus-Rnor_6.0-dbSNP149.genometemplate\sequences\NC_005104_chr5.gbk#0	173707219	NC_005104.4	-	28652	147779627..147750976	313050, 2994		Lck	Lck1, Lcktkr
Fam167b	49.382	100.628	4.024	53.017	2.03777	1.89805	0.075909	0.931434	Z-012016	Fam167b	gene		D:\assemblies\Rattus_norvegicus-Rnor_6.0-dbSNP149\Rattus_norvegicus-Rnor_6.0-dbSNP149.genometemplate\sequences\NC_005104_chr5.gbk#0	173707219	NC_005104.4	-	1654	147784345..147782692	682360, 1584589		Fam167b
LOC108351040	0.467	1.198	2.997	0.577	2.56667	2.07735	5.19519	0.809356	Z-012045	LOC108351040	gene		D:\assemblies\Rattus_norvegicus-Rnor_6.0-dbSNP149\Rattus_norvegicus-Rnor_6.0-dbSNP149.genometemplate\sequences\NC_005104_chr5.gbk#0	173707219	NC_005104.4	+	11839	148966201..148978039	108351040		LOC108351040
Ptpru	0.042	0.047	0.074	0.001	1.1348	50.2274	78.4413	44.2612	Z-012051	Ptpru	gene		D:\assemblies\Rattus_norvegicus-Rnor_6.0-dbSNP149\Rattus_norvegicus-Rnor_6.0-dbSNP149.genometemplate\sequences\NC_005104_chr5.gbk#0	173707219	NC_005104.4	-	73979	149996352..149922374	116680, 620782		Ptpru
Epb41	13.467	17.075	3.582	18.329	1.26793	0.931577	0.195427	0.734725	Z-012056	Epb41	gene		D:\assemblies\Rattus_norvegicus-Rnor_6.0-dbSNP149\Rattus_norvegicus-Rnor_6.0-dbSNP149.genometemplate\sequences\NC_005104_chr5.gbk#0	173707219	NC_005104.4	-	161460	150243186..150081727	313052, 1564762		Epb41
Trnau1ap	5.598	12.249	48.014	8.458	2.18812	1.44818	5.67641	0.661839	Z-012060	Trnau1ap	gene		D:\assemblies\Rattus_norvegicus-Rnor_6.0-dbSNP149\Rattus_norvegicus-Rnor_6.0-dbSNP149.genometemplate\sequences\NC_005104_chr5.gbk#0	173707219	NC_005104.4	-	43007	150506803..150463797	65241, 619995		Trnau1ap	Secp43, Trspap1
Rcc1	3.789	9.241	1.412	6.465	2.43886	1.42935	0.218434	0.586072	Z-012064	Rcc1	gene		D:\assemblies\Rattus_norvegicus-Rnor_6.0-dbSNP149\Rattus_norvegicus-Rnor_6.0-dbSNP149.genometemplate\sequences\NC_005104_chr5.gbk#0	173707219	NC_005104.4	-	22223	150531062..150508840	682908, 1592835		Rcc1
Phactr4	3.268	6.764	0.603	4.458	2.06954	1.51739	0.135309	0.733205	Z-012065	Phactr4	gene		D:\assemblies\Rattus_norvegicus-Rnor_6.0-dbSNP149\Rattus_norvegicus-Rnor_6.0-dbSNP149.genometemplate\sequences\NC_005104_chr5.gbk#0	173707219	NC_005104.4	-	75529	150609423..150533895	682920, 1592823		Phactr4
Sytl1	0.068	1.266	21.74	0.396	18.7076	3.20189	54.969	0.171155	Z-012088	Sytl1	gene		D:\assemblies\Rattus_norvegicus-Rnor_6.0-dbSNP149\Rattus_norvegicus-Rnor_6.0-dbSNP149.genometemplate\sequences\NC_005104_chr5.gbk#0	173707219	NC_005104.4	-	11232	151459870..151448639	297872, 1310715		Sytl1	Slp-1
Wdtc1	8.035	13.768	1.595	7.996	1.71345	1.72178	0.199402	1.00486	Z-012090	Wdtc1	gene		D:\assemblies\Rattus_norvegicus-Rnor_6.0-dbSNP149\Rattus_norvegicus-Rnor_6.0-dbSNP149.genometemplate\sequences\NC_005104_chr5.gbk#0	173707219	NC_005104.4	-	49258	151536829..151487572	313020, 1310362		Wdtc1
Nr0b2	0.24	1.448	0.134	0.939	6.04011	1.54265	0.142824	0.255402	Z-012099	Nr0b2	gene		D:\assemblies\Rattus_norvegicus-Rnor_6.0-dbSNP149\Rattus_norvegicus-Rnor_6.0-dbSNP149.genometemplate\sequences\NC_005104_chr5.gbk#0	173707219	NC_005104.4	+	3316	151776004..151779319	117274, 621032		Nr0b2	Shp
Hmgn2	171.76	434.166	55.198	230.601	2.52776	1.88276	0.239365	0.744834	Z-012108	Hmgn2	gene		D:\assemblies\Rattus_norvegicus-Rnor_6.0-dbSNP149\Rattus_norvegicus-Rnor_6.0-dbSNP149.genometemplate\sequences\NC_005104_chr5.gbk#0	173707219	NC_005104.4	-	3455	152198813..152195359	114637, 620649		Hmgn2	Hmg17
Cnksr1	0.224	0.512	0.09	0.409	2.29093	1.25408	0.22075	0.54741	Z-012120	Cnksr1	gene		D:\assemblies\Rattus_norvegicus-Rnor_6.0-dbSNP149\Rattus_norvegicus-Rnor_6.0-dbSNP149.genometemplate\sequences\NC_005104_chr5.gbk#0	173707219	NC_005104.4	-	10658	152458005..152447348	298545, 1311879		Cnksr1
LOC108351044	4.906	13.075	26.78	5.692	2.66531	2.29729	4.70519	0.861925	Z-012131	LOC108351044	gene		D:\assemblies\Rattus_norvegicus-Rnor_6.0-dbSNP149\Rattus_norvegicus-Rnor_6.0-dbSNP149.genometemplate\sequences\NC_005104_chr5.gbk#0	173707219	NC_005104.4	-	3141	152689692..152686552	108351044		LOC108351044
Rhd	16.136	32.738	0.054	19.958	2.02888	1.64037	0.00271591	0.808511	Z-012141	Rhd	gene		D:\assemblies\Rattus_norvegicus-Rnor_6.0-dbSNP149\Rattus_norvegicus-Rnor_6.0-dbSNP149.genometemplate\sequences\NC_005104_chr5.gbk#0	173707219	NC_005104.4	+	34594	153197416..153232009	60414, 620451		Rhd	Rh, Rhced
Clic4	16.685	29.442	2.965	20.264	1.7646	1.45294	0.146325	0.823386	Z-012147	Clic4	gene		D:\assemblies\Rattus_norvegicus-Rnor_6.0-dbSNP149\Rattus_norvegicus-Rnor_6.0-dbSNP149.genometemplate\sequences\NC_005104_chr5.gbk#0	173707219	NC_005104.4	-	56733	153625669..153568937	83718, 61857		Clic4
Fuca1	10.799	16.393	68.485	10.772	1.51796	1.52181	6.35771	1.00254	Z-012164	Fuca1	gene		D:\assemblies\Rattus_norvegicus-Rnor_6.0-dbSNP149\Rattus_norvegicus-Rnor_6.0-dbSNP149.genometemplate\sequences\NC_005104_chr5.gbk#0	173707219	NC_005104.4	+	17250	154269296..154286545	24375, 2636		Fuca1	Fuca
Rpl11	408.75	995.372	2737.65	505.974	2.43516	1.96724	5.41067	0.807849	Z-012170	Rpl11	gene		D:\assemblies\Rattus_norvegicus-Rnor_6.0-dbSNP149\Rattus_norvegicus-Rnor_6.0-dbSNP149.genometemplate\sequences\NC_005104_chr5.gbk#0	173707219	NC_005104.4	-	3604	154394412..154390809	362631, 1308681		Rpl11
E2f2	13.199	24.186	1.162	15.028	1.83239	1.60935	0.0773207	0.878279	Z-012173	E2f2	gene		D:\assemblies\Rattus_norvegicus-Rnor_6.0-dbSNP149\Rattus_norvegicus-Rnor_6.0-dbSNP149.genometemplate\sequences\NC_005104_chr5.gbk#0	173707219	NC_005104.4	+	23618	154516611..154540228	684111, 1593939		E2f2
LOC103692495	0.351	1.805	2.401	0.587	5.1485	3.07592	4.09162	0.597439	Z-012180	LOC103692495	gene		D:\assemblies\Rattus_norvegicus-Rnor_6.0-dbSNP149\Rattus_norvegicus-Rnor_6.0-dbSNP149.genometemplate\sequences\NC_005104_chr5.gbk#0	173707219	NC_005104.4	-	5836	154898934..154893099	103692495, 9306104		LOC103692495
Luzp1	0.969	1.553	0.237	1.63	1.60309	0.952805	0.145386	0.594354	Z-012181	Luzp1	gene		D:\assemblies\Rattus_norvegicus-Rnor_6.0-dbSNP149\Rattus_norvegicus-Rnor_6.0-dbSNP149.genometemplate\sequences\NC_005104_chr5.gbk#0	173707219	NC_005104.4	+	75950	154831697..154907646	79428, 61839		Luzp1	Luzp
Ldlrad2	0.005	0.051	0.001	0.235	10.7862	0.214935	0.00401423	0.0199268	Z-012199	Ldlrad2	gene		D:\assemblies\Rattus_norvegicus-Rnor_6.0-dbSNP149\Rattus_norvegicus-Rnor_6.0-dbSNP149.genometemplate\sequences\NC_005104_chr5.gbk#0	173707219	NC_005104.4	-	7753	155922269..155914517	502992, 1564888		Ldlrad2
Alpl	3.995	3.62	0.139	2.44	0.906208	1.48376	0.0568129	1.63733	Z-012202	Alpl	gene		D:\assemblies\Rattus_norvegicus-Rnor_6.0-dbSNP149\Rattus_norvegicus-Rnor_6.0-dbSNP149.genometemplate\sequences\NC_005104_chr5.gbk#0	173707219	NC_005104.4	-	55018	156141513..156086496	25586, 2100		Alpl	Akp2, PHOA
Pink1	17.942	21.391	2.317	19.944	1.19224	1.07256	0.116174	0.899615	Z-012209	Pink1	gene		D:\assemblies\Rattus_norvegicus-Rnor_6.0-dbSNP149\Rattus_norvegicus-Rnor_6.0-dbSNP149.genometemplate\sequences\NC_005104_chr5.gbk#0	173707219	NC_005104.4	-	12113	156689258..156677146	298575, 1305769		Pink1
Pla2g2f	0.001	0.005	0.249	0.001	5.33344	5.33344	263.438	1	Z-012221	Pla2g2f	gene		D:\assemblies\Rattus_norvegicus-Rnor_6.0-dbSNP149\Rattus_norvegicus-Rnor_6.0-dbSNP149.genometemplate\sequences\NC_005104_chr5.gbk#0	173707219	NC_005104.4	-	25219	157217265..157192047	690388, 1597305		Pla2g2f
Pla2g2a	42.271	81.267	3.472	25.505	1.92252	3.1863	0.13614	1.65736	Z-012224	Pla2g2a	gene		D:\assemblies\Rattus_norvegicus-Rnor_6.0-dbSNP149\Rattus_norvegicus-Rnor_6.0-dbSNP149.genometemplate\sequences\NC_005104_chr5.gbk#0	173707219	NC_005104.4	+	2646	157282650..157285295	29692, 620857		Pla2g2a	sPLA2
LOC102557514	0.035	0.008	0.821	0.001	0.232129	8.69982	869.075	37.4784	Z-012232	LOC102557514	gene		D:\assemblies\Rattus_norvegicus-Rnor_6.0-dbSNP149\Rattus_norvegicus-Rnor_6.0-dbSNP149.genometemplate\sequences\NC_005104_chr5.gbk#0	173707219	NC_005104.4	-	660	157642737..157642078	102557514, 7727057		LOC102557514
Akr7a3	0.897	3.419	0.652	2.749	3.8129	1.24381	0.237169	0.326212	Z-012237	Akr7a3	gene		D:\assemblies\Rattus_norvegicus-Rnor_6.0-dbSNP149\Rattus_norvegicus-Rnor_6.0-dbSNP149.genometemplate\sequences\NC_005104_chr5.gbk#0	173707219	NC_005104.4	+	12637	157801120..157813756	26760, 628635		Akr7a3	Afar, Akr7a1
Tas1r2	0.004	0.007	0.041	0.001	1.59842	7.41929	43.8608	4.64164	Z-012244	Tas1r2	gene		D:\assemblies\Rattus_norvegicus-Rnor_6.0-dbSNP149\Rattus_norvegicus-Rnor_6.0-dbSNP149.genometemplate\sequences\NC_005104_chr5.gbk#0	173707219	NC_005104.4	+	15840	158119894..158135733	100270683		Tas1r2	Aldh4a1, Gpr71, Tr2
LOC102546563	0.042	0.042	0.001	0.379	0.998918	0.110676	0.00249238	0.110796	Z-012261	LOC102546563	gene		D:\assemblies\Rattus_norvegicus-Rnor_6.0-dbSNP149\Rattus_norvegicus-Rnor_6.0-dbSNP149.genometemplate\sequences\NC_005104_chr5.gbk#0	173707219	NC_005104.4	-	1368	159396732..159395365	102546563, 7726360		LOC102546563
LOC102546642	0.001	0.011	0.001	0.306	11.8943	0.0367145	0.00308673	0.00308673	Z-012262	LOC102546642	gene		D:\assemblies\Rattus_norvegicus-Rnor_6.0-dbSNP149\Rattus_norvegicus-Rnor_6.0-dbSNP149.genometemplate\sequences\NC_005104_chr5.gbk#0	173707219	NC_005104.4	+	4888	159399199..159404086	102546642, 7706312		LOC102546642
Clcnkb	0.001	0.033	0.206	0.001	34.7272	34.7272	218.174	1	Z-012279	Clcnkb	gene		D:\assemblies\Rattus_norvegicus-Rnor_6.0-dbSNP149\Rattus_norvegicus-Rnor_6.0-dbSNP149.genometemplate\sequences\NC_005104_chr5.gbk#0	173707219	NC_005104.4	-	23193	159973576..159950384	79430, 628639		Clcnkb	ClC-K2L, Clck2, Clcnk1l
Ctrc	1.714	1.633	4.341	0.857	0.953067	1.90587	5.06558	1.99973	Z-012294	Ctrc	gene		D:\assemblies\Rattus_norvegicus-Rnor_6.0-dbSNP149\Rattus_norvegicus-Rnor_6.0-dbSNP149.genometemplate\sequences\NC_005104_chr5.gbk#0	173707219	NC_005104.4	-	8697	160403373..160394677	362653, 1308379		Ctrc
LOC102554076	0.001	0.001	0.083	0.001	1	1	87.4457	1	Z-012301	LOC102554076	gene		D:\assemblies\Rattus_norvegicus-Rnor_6.0-dbSNP149\Rattus_norvegicus-Rnor_6.0-dbSNP149.genometemplate\sequences\NC_005104_chr5.gbk#0	173707219	NC_005104.4	+	6824	161251174..161257997	102554076, 7709749		LOC102554076
LOC103692503	0.001	0.001	0.075	0.001	1	1	78.9828	1	Z-012304	LOC103692503	gene		D:\assemblies\Rattus_norvegicus-Rnor_6.0-dbSNP149\Rattus_norvegicus-Rnor_6.0-dbSNP149.genometemplate\sequences\NC_005104_chr5.gbk#0	173707219	NC_005104.4	+	14637	161773906..161788542	103692503, 9275519		LOC103692503
LOC100362684	110.331	302.271	885.462	145.598	2.73968	2.07607	6.08154	0.757776	Z-012305	LOC100362684	gene		D:\assemblies\Rattus_norvegicus-Rnor_6.0-dbSNP149\Rattus_norvegicus-Rnor_6.0-dbSNP149.genometemplate\sequences\NC_005104_chr5.gbk#0	173707219	NC_005104.4	+	518	161889229..161889746	100362684, 2324274		LOC100362684
Tnfrsf8	0.001	0.001	0.129	0.001	1	1	136.168	1	Z-012327	Tnfrsf8	gene		D:\assemblies\Rattus_norvegicus-Rnor_6.0-dbSNP149\Rattus_norvegicus-Rnor_6.0-dbSNP149.genometemplate\sequences\NC_005104_chr5.gbk#0	173707219	NC_005104.4	-	45230	163231578..163186349	25069, 3879		Tnfrsf8	Cd30
LOC102550754	0.001	0.006	0.718	0.001	6.25431	6.25431	759.294	1	Z-012332	LOC102550754	gene		D:\assemblies\Rattus_norvegicus-Rnor_6.0-dbSNP149\Rattus_norvegicus-Rnor_6.0-dbSNP149.genometemplate\sequences\NC_005104_chr5.gbk#0	173707219	NC_005104.4	+	823	163558565..163559387	102550754, 7547575		LOC102550754
LOC102551209	0.001	0.006	0.718	0.001	6.25431	6.25431	759.294	1	Z-012335	LOC102551209	gene		D:\assemblies\Rattus_norvegicus-Rnor_6.0-dbSNP149\Rattus_norvegicus-Rnor_6.0-dbSNP149.genometemplate\sequences\NC_005104_chr5.gbk#0	173707219	NC_005104.4	+	823	163712051..163712873	102551209, 7694630		LOC102551209
LOC100911485	0.877	1.124	0.208	1.018	1.28111	1.10385	0.204455	0.861632	Z-012347	LOC100911485	gene		D:\assemblies\Rattus_norvegicus-Rnor_6.0-dbSNP149\Rattus_norvegicus-Rnor_6.0-dbSNP149.genometemplate\sequences\NC_005104_chr5.gbk#0	173707219	NC_005104.4	-	25818	164586254..164560437	100911485, 6492845		LOC100911485
Mfn2	4.385	5.618	1.041	5.09	1.28111	1.10385	0.204455	0.861632	Z-012350	Mfn2	gene		D:\assemblies\Rattus_norvegicus-Rnor_6.0-dbSNP149\Rattus_norvegicus-Rnor_6.0-dbSNP149.genometemplate\sequences\NC_005104_chr5.gbk#0	173707219	NC_005104.4	-	31171	164715414..164684244	64476, 628843		Mfn2	HSG
LOC102551309	0.001	0.02	0.077	0.001	20.9175	20.9175	81.2651	1	Z-012357	LOC102551309	gene		D:\assemblies\Rattus_norvegicus-Rnor_6.0-dbSNP149\Rattus_norvegicus-Rnor_6.0-dbSNP149.genometemplate\sequences\NC_005104_chr5.gbk#0	173707219	NC_005104.4	-	10049	164885606..164875558	102551309, 7658417		LOC102551309
LOC691354	0.001	0.024	0.132	0.001	24.9702	24.9702	139.399	1	Z-012377	LOC691354	gene		D:\assemblies\Rattus_norvegicus-Rnor_6.0-dbSNP149\Rattus_norvegicus-Rnor_6.0-dbSNP149.genometemplate\sequences\NC_005104_chr5.gbk#0	173707219	NC_005104.4	+	26544	165464832..165491375	691354, 1585063		LOC691354
Cort	0.001	0.001	2.357	0.001	1	1	2493.56	1	Z-012383	Cort	gene		D:\assemblies\Rattus_norvegicus-Rnor_6.0-dbSNP149\Rattus_norvegicus-Rnor_6.0-dbSNP149.genometemplate\sequences\NC_005104_chr5.gbk#0	173707219	NC_005104.4	-	1442	165944221..165942780	25305, 2383		Cort
Pgd	21.951	61.404	7.303	33.042	2.79734	1.85837	0.221012	0.664337	Z-012385	Pgd	gene		D:\assemblies\Rattus_norvegicus-Rnor_6.0-dbSNP149\Rattus_norvegicus-Rnor_6.0-dbSNP149.genometemplate\sequences\NC_005104_chr5.gbk#0	173707219	NC_005104.4	-	16200	165982327..165966128	100360180, 1583832		Pgd	Cc2-27
Nmnat1	0.803	0.188	5.429	1.05	0.233763	0.178818	5.17022	0.764953	Z-012392	Nmnat1	gene		D:\assemblies\Rattus_norvegicus-Rnor_6.0-dbSNP149\Rattus_norvegicus-Rnor_6.0-dbSNP149.genometemplate\sequences\NC_005104_chr5.gbk#0	173707219	NC_005104.4	-	20832	166430291..166409460	298653, 1310996		Nmnat1
Slc25a33	0.47	3.517	3.55	0.794	7.4873	4.4314	4.47306	0.591855	Z-012398	Slc25a33	gene		D:\assemblies\Rattus_norvegicus-Rnor_6.0-dbSNP149\Rattus_norvegicus-Rnor_6.0-dbSNP149.genometemplate\sequences\NC_005104_chr5.gbk#0	173707219	NC_005104.4	-	25332	166726794..166701463	691431, 1583942		Slc25a33
Tnfrsf9	0.006	0.005	6.745	0.001	0.847183	5.4998	7136.65	6.49187	Z-012424	Tnfrsf9	gene		D:\assemblies\Rattus_norvegicus-Rnor_6.0-dbSNP149\Rattus_norvegicus-Rnor_6.0-dbSNP149.genometemplate\sequences\NC_005104_chr5.gbk#0	173707219	NC_005104.4	+	26569	168009245..168035813	500590, 1598208		Tnfrsf9	4-1BB
Vamp3	18.203	23.202	5.152	21.575	1.27467	1.07542	0.238776	0.843683	Z-012428	Vamp3	gene		D:\assemblies\Rattus_norvegicus-Rnor_6.0-dbSNP149\Rattus_norvegicus-Rnor_6.0-dbSNP149.genometemplate\sequences\NC_005104_chr5.gbk#0	173707219	NC_005104.4	-	10472	168136628..168126157	29528, 61880		Vamp3
LOC100362830	1.301	0.24	9.497	1.129	0.184612	0.212866	8.41398	1.15304	Z-012433	LOC100362830	gene		D:\assemblies\Rattus_norvegicus-Rnor_6.0-dbSNP149\Rattus_norvegicus-Rnor_6.0-dbSNP149.genometemplate\sequences\NC_005104_chr5.gbk#0	173707219	NC_005104.4	-	662	169022178..169021517	100362830, 2323948		LOC100362830
Zbtb48	0.716	0.188	7.741	0.767	0.26291	0.245389	10.0948	0.93336	Z-012438	Zbtb48	gene		D:\assemblies\Rattus_norvegicus-Rnor_6.0-dbSNP149\Rattus_norvegicus-Rnor_6.0-dbSNP149.genometemplate\sequences\NC_005104_chr5.gbk#0	173707219	NC_005104.4	-	8370	169200140..169191771	362668, 1311581		Zbtb48	Hkr3
Rpl22	226.824	566.96	1541.32	286.786	2.49956	1.97694	5.37445	0.790917	Z-012450	Rpl22	gene		D:\assemblies\Rattus_norvegicus-Rnor_6.0-dbSNP149\Rattus_norvegicus-Rnor_6.0-dbSNP149.genometemplate\sequences\NC_005104_chr5.gbk#0	173707219	NC_005104.4	+	6726	169506150..169512875	81768, 621189		Rpl22
LOC102549463	0.005	0.004	0.064	0.001	0.801145	4.10161	67.755	5.11969	Z-012456	LOC102549463	gene		D:\assemblies\Rattus_norvegicus-Rnor_6.0-dbSNP149\Rattus_norvegicus-Rnor_6.0-dbSNP149.genometemplate\sequences\NC_005104_chr5.gbk#0	173707219	NC_005104.4	-	11373	170063858..170052486	102549463, 7559930		LOC102549463
LOC102551562	0.001	0.001	0.25	0.001	1	1	264.898	1	Z-012467	LOC102551562	gene		D:\assemblies\Rattus_norvegicus-Rnor_6.0-dbSNP149\Rattus_norvegicus-Rnor_6.0-dbSNP149.genometemplate\sequences\NC_005104_chr5.gbk#0	173707219	NC_005104.4	+	30705	171327670..171358374	102551562, 7631678		LOC102551562
LOC103692525	0.001	0.006	7.187	0.001	5.90832	5.90832	7603.96	1	Z-012482	LOC103692525	gene		D:\assemblies\Rattus_norvegicus-Rnor_6.0-dbSNP149\Rattus_norvegicus-Rnor_6.0-dbSNP149.genometemplate\sequences\NC_005104_chr5.gbk#0	173707219	NC_005104.4	-	871	172327296..172326426	103692525, 9190664		LOC103692525
Tnfrsf14	2.044	5.706	40.182	3.294	2.7909	1.73198	12.1966	0.620579	Z-012483	Tnfrsf14	gene		D:\assemblies\Rattus_norvegicus-Rnor_6.0-dbSNP149\Rattus_norvegicus-Rnor_6.0-dbSNP149.genometemplate\sequences\NC_005104_chr5.gbk#0	173707219	NC_005104.4	-	8963	172337221..172328259	366518, 1310115		Tnfrsf14
Rer1	7.177	14.754	46.526	10.196	2.0559	1.44707	4.56321	0.703863	Z-012488	Rer1	gene		D:\assemblies\Rattus_norvegicus-Rnor_6.0-dbSNP149\Rattus_norvegicus-Rnor_6.0-dbSNP149.genometemplate\sequences\NC_005104_chr5.gbk#0	173707219	NC_005104.4	-	12077	172488822..172476746	298675, 1306324		Rer1	RGD1306324
Nadk	17.639	32.376	4.716	19.897	1.83547	1.62718	0.237017	0.886519	Z-012499	Nadk	gene		D:\assemblies\Rattus_norvegicus-Rnor_6.0-dbSNP149\Rattus_norvegicus-Rnor_6.0-dbSNP149.genometemplate\sequences\NC_005104_chr5.gbk#0	173707219	NC_005104.4	+	30576	172984930..173015505	100125370, 1642420		Nadk
Cdk11b	8.736	13.573	75.498	11.073	1.55372	1.22575	6.8179	0.788918	Z-012501	Cdk11b	gene		D:\assemblies\Rattus_norvegicus-Rnor_6.0-dbSNP149\Rattus_norvegicus-Rnor_6.0-dbSNP149.genometemplate\sequences\NC_005104_chr5.gbk#0	173707219	NC_005104.4	+	26150	173051900..173078049	252879, 628604		Cdk11b	Cdc2l1, Cdk11
Ccnl2	2.274	3.326	40.574	3.191	1.46263	1.04224	12.7142	0.712584	Z-012515	Ccnl2	gene		D:\assemblies\Rattus_norvegicus-Rnor_6.0-dbSNP149\Rattus_norvegicus-Rnor_6.0-dbSNP149.genometemplate\sequences\NC_005104_chr5.gbk#0	173707219	NC_005104.4	+	11979	173256301..173268279	298686, 1309149		Ccnl2
Aurkaip1	22.372	58.873	155.52	27.42	2.63151	2.1471	5.67182	0.815918	Z-012516	Aurkaip1	gene		D:\assemblies\Rattus_norvegicus-Rnor_6.0-dbSNP149\Rattus_norvegicus-Rnor_6.0-dbSNP149.genometemplate\sequences\NC_005104_chr5.gbk#0	173707219	NC_005104.4	+	1738	173274433..173276170	298687, 1303211		Aurkaip1	Akip
Mxra8	6.147	3.22	0.752	4.557	0.523867	0.706634	0.16492	1.34888	Z-012517	Mxra8	gene		D:\assemblies\Rattus_norvegicus-Rnor_6.0-dbSNP149\Rattus_norvegicus-Rnor_6.0-dbSNP149.genometemplate\sequences\NC_005104_chr5.gbk#0	173707219	NC_005104.4	+	4727	173288200..173292926	313770, 1359356		Mxra8	1200013a08rik
Scnn1d	0.285	1.066	2.306	0.439	3.74365	2.42809	5.25259	0.648588	Z-012524	Scnn1d	gene		D:\assemblies\Rattus_norvegicus-Rnor_6.0-dbSNP149\Rattus_norvegicus-Rnor_6.0-dbSNP149.genometemplate\sequences\NC_005104_chr5.gbk#0	173707219	NC_005104.4	-	19045	173372559..173353515	103692528, 9368664		Scnn1d
B3galt6	0.422	0.069	0.001	0.261	0.163005	0.264345	0.00362802	1.6217	Z-012527	B3galt6	gene		D:\assemblies\Rattus_norvegicus-Rnor_6.0-dbSNP149\Rattus_norvegicus-Rnor_6.0-dbSNP149.genometemplate\sequences\NC_005104_chr5.gbk#0	173707219	NC_005104.4	-	2137	173425611..173423475	298690, 1309558		B3galt6
Tnfrsf4	0.006	0.001	13.056	0.001	0.16142	1	13813.5	6.19503	Z-012529	Tnfrsf4	gene		D:\assemblies\Rattus_norvegicus-Rnor_6.0-dbSNP149\Rattus_norvegicus-Rnor_6.0-dbSNP149.genometemplate\sequences\NC_005104_chr5.gbk#0	173707219	NC_005104.4	+	2691	173447784..173450474	25572, 3920		Tnfrsf4	Ox40, Txgp1
RGD1311517	0.035	0.009	0.48	0.001	0.253895	9.43992	507.706	37.1804	Z-012537	RGD1311517	gene		D:\assemblies\Rattus_norvegicus-Rnor_6.0-dbSNP149\Rattus_norvegicus-Rnor_6.0-dbSNP149.genometemplate\sequences\NC_005104_chr5.gbk#0	173707219	NC_005104.4	+	17704	173542058..173559761	313775, 1311517		RGD1311517
Noc2l	3.934	4.295	30.369	3.84	1.09168	1.11829	7.90798	1.02438	Z-012544	Noc2l	gene		D:\assemblies\Rattus_norvegicus-Rnor_6.0-dbSNP149\Rattus_norvegicus-Rnor_6.0-dbSNP149.genometemplate\sequences\NC_005104_chr5.gbk#0	173707219	NC_005104.4	+	12904	173659796..173672699	313777, 1309387		Noc2l	RGD1309387
Fez2	10.763	15.54	1.155	12.2	1.44392	1.27381	0.0946858	0.882194	Z-012548	Fez2	gene		D:\assemblies\Rattus_norvegicus-Rnor_6.0-dbSNP149\Rattus_norvegicus-Rnor_6.0-dbSNP149.genometemplate\sequences\NC_005105_chr6.gbk#0	147991367	NC_005105.4	-	40053	1003955..963903	94269, 619709		Fez2	Zrp
LOC103692531	5.633	14.694	28.286	6.015	2.60861	2.44309	4.70277	0.936549	Z-012557	LOC103692531	gene		D:\assemblies\Rattus_norvegicus-Rnor_6.0-dbSNP149\Rattus_norvegicus-Rnor_6.0-dbSNP149.genometemplate\sequences\NC_005105_chr6.gbk#0	147991367	NC_005105.4	+	4668	1514191..1518858	103692531, 9177508		LOC103692531
Cebpz	3.53	6	17.861	4.165	1.69963	1.44057	4.2885	0.847583	Z-012558	Cebpz	gene		D:\assemblies\Rattus_norvegicus-Rnor_6.0-dbSNP149\Rattus_norvegicus-Rnor_6.0-dbSNP149.genometemplate\sequences\NC_005105_chr6.gbk#0	147991367	NC_005105.4	-	17685	1534488..1516804	362686, 1304994		Cebpz	Cbf
Srsf7	18.63	42.295	172.619	22.457	2.27031	1.88337	7.68661	0.829564	Z-012577	Srsf7	gene		D:\assemblies\Rattus_norvegicus-Rnor_6.0-dbSNP149\Rattus_norvegicus-Rnor_6.0-dbSNP149.genometemplate\sequences\NC_005105_chr6.gbk#0	147991367	NC_005105.4	-	7194	2886505..2879312	362687, 1307425		Srsf7	Sfrs7
LOC103692535	0.004	0.004	0.138	0.001	0.907763	3.7655	145.94	4.14811	Z-012586	LOC103692535	gene		D:\assemblies\Rattus_norvegicus-Rnor_6.0-dbSNP149\Rattus_norvegicus-Rnor_6.0-dbSNP149.genometemplate\sequences\NC_005105_chr6.gbk#0	147991367	NC_005105.4	-	3122	3390883..3387762	103692535, 9403317		LOC103692535
LOC102551952	0.195	0.939	0.001	0.321	4.81029	2.93078	0.00294844	0.609272	Z-012590	LOC102551952	gene		D:\assemblies\Rattus_norvegicus-Rnor_6.0-dbSNP149\Rattus_norvegicus-Rnor_6.0-dbSNP149.genometemplate\sequences\NC_005105_chr6.gbk#0	147991367	NC_005105.4	+	8022	3631238..3639259	102551952, 7629169		LOC102551952
LOC102553857	0.002	0.008	0.15	0.002	3.08324	3.65736	72.1519	1.18621	Z-012599	LOC102553857	gene		D:\assemblies\Rattus_norvegicus-Rnor_6.0-dbSNP149\Rattus_norvegicus-Rnor_6.0-dbSNP149.genometemplate\sequences\NC_005105_chr6.gbk#0	147991367	NC_005105.4	-	18614	6276006..6257393	102553857, 7517311		LOC102553857
LOC102554883	0.509	2.34	8.9	1.255	4.59419	1.86462	7.09076	0.405865	Z-012611	LOC102554883	gene		D:\assemblies\Rattus_norvegicus-Rnor_6.0-dbSNP149\Rattus_norvegicus-Rnor_6.0-dbSNP149.genometemplate\sequences\NC_005105_chr6.gbk#0	147991367	NC_005105.4	-	8447	6682090..6673644	102554883, 7673523		LOC102554883
LOC103692545	0.001	0.008	0.186	0.001	8.52128	8.52128	196.305	1	Z-012615	LOC103692545	gene		D:\assemblies\Rattus_norvegicus-Rnor_6.0-dbSNP149\Rattus_norvegicus-Rnor_6.0-dbSNP149.genometemplate\sequences\NC_005105_chr6.gbk#0	147991367	NC_005105.4	-	1478	6744831..6743354	103692545, 9459711		LOC103692545
Mta3	3.325	2.406	12.387	2.923	0.723535	0.822884	4.23725	1.13731	Z-012617	Mta3	gene		D:\assemblies\Rattus_norvegicus-Rnor_6.0-dbSNP149\Rattus_norvegicus-Rnor_6.0-dbSNP149.genometemplate\sequences\NC_005105_chr6.gbk#0	147991367	NC_005105.4	+	132481	6904449..7036929	100362346, 1306803		Mta3
Abcg5	0.001	0.008	0.346	0.001	8.78105	8.78105	365.637	1	Z-012629	Abcg5	gene		D:\assemblies\Rattus_norvegicus-Rnor_6.0-dbSNP149\Rattus_norvegicus-Rnor_6.0-dbSNP149.genometemplate\sequences\NC_005105_chr6.gbk#0	147991367	NC_005105.4	-	25437	7961207..7935771	114628, 620298		Abcg5
Abcg8	0.006	0.297	0.001	0.086	52.895	3.46889	0.011037	0.0655807	Z-012630	Abcg8	gene		D:\assemblies\Rattus_norvegicus-Rnor_6.0-dbSNP149\Rattus_norvegicus-Rnor_6.0-dbSNP149.genometemplate\sequences\NC_005105_chr6.gbk#0	147991367	NC_005105.4	+	19296	7961413..7980708	155192, 620300		Abcg8
LOC108351169	0.013	0.264	0.034	0.001	20.7463	279.385	36.1626	13.4667	Z-012645	LOC108351169	gene		D:\assemblies\Rattus_norvegicus-Rnor_6.0-dbSNP149\Rattus_norvegicus-Rnor_6.0-dbSNP149.genometemplate\sequences\NC_005105_chr6.gbk#0	147991367	NC_005105.4	-	10851	9140821..9129971	108351169		LOC108351169
LOC102551210	0.116	0.347	0.031	0.183	2.99337	1.89568	0.168275	0.633295	Z-012646	LOC102551210	gene		D:\assemblies\Rattus_norvegicus-Rnor_6.0-dbSNP149\Rattus_norvegicus-Rnor_6.0-dbSNP149.genometemplate\sequences\NC_005105_chr6.gbk#0	147991367	NC_005105.4	+	29187	9195902..9225088	102551210, 7522754		LOC102551210
Epas1	30.034	27.292	3.198	38.257	0.908687	0.713378	0.0835807	0.785065	Z-012654	Epas1	gene		D:\assemblies\Rattus_norvegicus-Rnor_6.0-dbSNP149\Rattus_norvegicus-Rnor_6.0-dbSNP149.genometemplate\sequences\NC_005105_chr6.gbk#0	147991367	NC_005105.4	+	78732	10306508..10385239	29452, 68404		Epas1	Hif2a, HLF
Atp6v1e2	0.004	0.02	0.203	0.001	5.65747	21.2174	215.047	3.75033	Z-012656	Atp6v1e2	gene		D:\assemblies\Rattus_norvegicus-Rnor_6.0-dbSNP149\Rattus_norvegicus-Rnor_6.0-dbSNP149.genometemplate\sequences\NC_005105_chr6.gbk#0	147991367	NC_005105.4	-	6690	10517059..10510370	366545, 1311680		Atp6v1e2
LOC103692551	0.001	0.481	0.454	0.001	508.567	508.567	479.84	1	Z-012662	LOC103692551	gene		D:\assemblies\Rattus_norvegicus-Rnor_6.0-dbSNP149\Rattus_norvegicus-Rnor_6.0-dbSNP149.genometemplate\sequences\NC_005105_chr6.gbk#0	147991367	NC_005105.4	-	1969	10671264..10669296	103692551, 9406116		LOC103692551
LOC681766	0.001	0.001	0.182	0.001	1	1	192.403	1	Z-012668	LOC681766	gene		D:\assemblies\Rattus_norvegicus-Rnor_6.0-dbSNP149\Rattus_norvegicus-Rnor_6.0-dbSNP149.genometemplate\sequences\NC_005105_chr6.gbk#0	147991367	NC_005105.4	-	48914	11063509..11014596	681766, 1591638		LOC681766
Ston1	1.556	2.905	0.218	2.454	1.86628	1.1837	0.0887221	0.634254	Z-012685	Ston1	gene		D:\assemblies\Rattus_norvegicus-Rnor_6.0-dbSNP149\Rattus_norvegicus-Rnor_6.0-dbSNP149.genometemplate\sequences\NC_005105_chr6.gbk#0	147991367	NC_005105.4	+	47319	12332465..12379783	360202, 727878		Ston1	Salf, Sblf
Ppp1cb	23.637	43.378	7.202	29.811	1.83517	1.45511	0.241597	0.7929	Z-012737	Ppp1cb	gene		D:\assemblies\Rattus_norvegicus-Rnor_6.0-dbSNP149\Rattus_norvegicus-Rnor_6.0-dbSNP149.genometemplate\sequences\NC_005105_chr6.gbk#0	147991367	NC_005105.4	-	32630	23581136..23548507	25594, 3376		Ppp1cb
Ypel5	42.292	54.764	8.71	40.482	1.29488	1.35279	0.215149	1.04472	Z-012744	Ypel5	gene		D:\assemblies\Rattus_norvegicus-Rnor_6.0-dbSNP149\Rattus_norvegicus-Rnor_6.0-dbSNP149.genometemplate\sequences\NC_005105_chr6.gbk#0	147991367	NC_005105.4	+	15408	24069351..24084758	298792, 1309657		Ypel5
Galnt14	0.001	0.001	0.412	0.001	1	1	435.768	1	Z-012756	Galnt14	gene		D:\assemblies\Rattus_norvegicus-Rnor_6.0-dbSNP149\Rattus_norvegicus-Rnor_6.0-dbSNP149.genometemplate\sequences\NC_005105_chr6.gbk#0	147991367	NC_005105.4	-	215404	24985711..24770308	313878, 1310068		Galnt14
Ehd3	32.668	60.583	4.396	40.588	1.85453	1.49264	0.108311	0.804859	Z-012757	Ehd3	gene		D:\assemblies\Rattus_norvegicus-Rnor_6.0-dbSNP149\Rattus_norvegicus-Rnor_6.0-dbSNP149.genometemplate\sequences\NC_005105_chr6.gbk#0	147991367	NC_005105.4	+	26446	25076012..25102457	192249, 621762		Ehd3	Ehd2
Xdh	15.938	17.989	1.488	18.629	1.12871	0.965637	0.0798685	0.855522	Z-012758	Xdh	gene		D:\assemblies\Rattus_norvegicus-Rnor_6.0-dbSNP149\Rattus_norvegicus-Rnor_6.0-dbSNP149.genometemplate\sequences\NC_005105_chr6.gbk#0	147991367	NC_005105.4	-	61704	25211273..25149570	497811, 62043		Xdh	XOR
Krtcap3	0.001	0.001	1.843	0.001	1	1	1950.49	1	Z-012777	Krtcap3	gene		D:\assemblies\Rattus_norvegicus-Rnor_6.0-dbSNP149\Rattus_norvegicus-Rnor_6.0-dbSNP149.genometemplate\sequences\NC_005105_chr6.gbk#0	147991367	NC_005105.4	-	1570	26486695..26485126	683980, 1596516		Krtcap3
Khk	0.008	0.739	5.629	0.372	97.9621	1.98493	15.1133	0.0202622	Z-012797	Khk	gene		D:\assemblies\Rattus_norvegicus-Rnor_6.0-dbSNP149\Rattus_norvegicus-Rnor_6.0-dbSNP149.genometemplate\sequences\NC_005105_chr6.gbk#0	147991367	NC_005105.4	-	10437	26821013..26810577	25659, 2966		Khk	KETHPRO
Mfsd2b	2.018	3.402	0.001	2.196	1.68562	1.54903	0.000430378	0.918965	Z-012837	Mfsd2b	gene		D:\assemblies\Rattus_norvegicus-Rnor_6.0-dbSNP149\Rattus_norvegicus-Rnor_6.0-dbSNP149.genometemplate\sequences\NC_005105_chr6.gbk#0	147991367	NC_005105.4	-	12091	28968245..28956155	500624, 1561716		Mfsd2b
Ubxn2a	2.18	8.847	0.895	4.394	4.05857	2.01349	0.203592	0.496109	Z-012838	Ubxn2a	gene		D:\assemblies\Rattus_norvegicus-Rnor_6.0-dbSNP149\Rattus_norvegicus-Rnor_6.0-dbSNP149.genometemplate\sequences\NC_005105_chr6.gbk#0	147991367	NC_005105.4	-	28517	28997987..28969471	685859, 1589027		Ubxn2a	Ubxd4
Fam228b	0.004	0.008	0.576	0.001	1.82025	8.07646	609.935	4.43701	Z-012848	Fam228b	gene		D:\assemblies\Rattus_norvegicus-Rnor_6.0-dbSNP149\Rattus_norvegicus-Rnor_6.0-dbSNP149.genometemplate\sequences\NC_005105_chr6.gbk#0	147991367	NC_005105.4	+	32401	30037995..30070395	100363146, 2324744		Fam228b
LOC257642	341.642	1382.98	31458.9	281.278	4.04802	4.91675	111.843	1.21461	Z-012853	LOC257642	gene		D:\assemblies\Rattus_norvegicus-Rnor_6.0-dbSNP149\Rattus_norvegicus-Rnor_6.0-dbSNP149.genometemplate\sequences\NC_005105_chr6.gbk#0	147991367	NC_005105.4	-	489	30639289..30638801	257642, 727924		LOC257642	ribin
LOC102548785	1.51	15.442	0.58	3.196	10.2256	4.83151	0.181341	0.472491	Z-012861	LOC102548785	gene		D:\assemblies\Rattus_norvegicus-Rnor_6.0-dbSNP149\Rattus_norvegicus-Rnor_6.0-dbSNP149.genometemplate\sequences\NC_005105_chr6.gbk#0	147991367	NC_005105.4	+	9608	30965455..30975062	102548785, 7700075		LOC102548785
Rhob	19.032	37.154	4.344	23.539	1.95217	1.57839	0.184531	0.808532	Z-012876	Rhob	gene		D:\assemblies\Rattus_norvegicus-Rnor_6.0-dbSNP149\Rattus_norvegicus-Rnor_6.0-dbSNP149.genometemplate\sequences\NC_005105_chr6.gbk#0	147991367	NC_005105.4	-	2175	33691301..33689127	64373, 621309		Rhob	Arhb
Vsnl1	1.372	0.211	0.001	1.068	0.153885	0.197778	0.00088525	1.28523	Z-012898	Vsnl1	gene		D:\assemblies\Rattus_norvegicus-Rnor_6.0-dbSNP149\Rattus_norvegicus-Rnor_6.0-dbSNP149.genometemplate\sequences\NC_005105_chr6.gbk#0	147991367	NC_005105.4	-	120610	37121969..37001360	24877, 3966		Vsnl1	Nvp1, Ratnvp1
LOC108351208	0.001	0.017	0.251	0.001	18.2338	18.2338	265.708	1	Z-012917	LOC108351208	gene		D:\assemblies\Rattus_norvegicus-Rnor_6.0-dbSNP149\Rattus_norvegicus-Rnor_6.0-dbSNP149.genometemplate\sequences\NC_005105_chr6.gbk#0	147991367	NC_005105.4	-	9494	41034056..41024563	108351208		LOC108351208
Greb1	0.003	0.005	0.036	0.001	1.50884	4.84929	38.0067	3.21393	Z-012925	Greb1	gene		D:\assemblies\Rattus_norvegicus-Rnor_6.0-dbSNP149\Rattus_norvegicus-Rnor_6.0-dbSNP149.genometemplate\sequences\NC_005105_chr6.gbk#0	147991367	NC_005105.4	-	69830	42002770..41932941	500633, 1564091		Greb1
Rock2	4.196	2.927	1.026	4.55	0.69763	0.643238	0.225565	0.922034	Z-012927	Rock2	gene		D:\assemblies\Rattus_norvegicus-Rnor_6.0-dbSNP149\Rattus_norvegicus-Rnor_6.0-dbSNP149.genometemplate\sequences\NC_005105_chr6.gbk#0	147991367	NC_005105.4	+	109047	42180864..42289910	25537, 3590		Rock2	ROCK-II, ROK
Rrm2	17.137	32.734	1.27	23.543	1.91016	1.39043	0.0539258	0.72791	Z-012952	Rrm2	gene		D:\assemblies\Rattus_norvegicus-Rnor_6.0-dbSNP149\Rattus_norvegicus-Rnor_6.0-dbSNP149.genometemplate\sequences\NC_005105_chr6.gbk#0	147991367	NC_005105.4	+	6192	43884627..43890818	362720, 1598310		Rrm2
LOC102554202	0.044	0.068	1.348	0.178	1.54777	0.383828	7.5628	0.247988	Z-012960	LOC102554202	gene		D:\assemblies\Rattus_norvegicus-Rnor_6.0-dbSNP149\Rattus_norvegicus-Rnor_6.0-dbSNP149.genometemplate\sequences\NC_005105_chr6.gbk#0	147991367	NC_005105.4	+	10733	44579539..44590271	102554202, 7629645		LOC102554202
Cmpk2	3.953	6.284	0.721	5.844	1.5895	1.07531	0.123303	0.676511	Z-012966	Cmpk2	gene		D:\assemblies\Rattus_norvegicus-Rnor_6.0-dbSNP149\Rattus_norvegicus-Rnor_6.0-dbSNP149.genometemplate\sequences\NC_005105_chr6.gbk#0	147991367	NC_005105.4	+	11583	45683242..45694824	314004, 1305881		Cmpk2	Tyki
Colec11	0.001	0.001	0.202	0.001	1	1	213.442	1	Z-012980	Colec11	gene		D:\assemblies\Rattus_norvegicus-Rnor_6.0-dbSNP149\Rattus_norvegicus-Rnor_6.0-dbSNP149.genometemplate\sequences\NC_005105_chr6.gbk#0	147991367	NC_005105.4	-	32195	47889961..47857767	366588, 1309678		Colec11
Rps7	524.735	1298.16	3258.52	655.937	2.47394	1.97909	4.96773	0.799977	Z-012981	Rps7	gene		D:\assemblies\Rattus_norvegicus-Rnor_6.0-dbSNP149\Rattus_norvegicus-Rnor_6.0-dbSNP149.genometemplate\sequences\NC_005105_chr6.gbk#0	147991367	NC_005105.4	-	4865	47904389..47899525	29258, 61907		Rps7
LOC102547240	0.001	0.001	0.269	0.001	1	1	285.061	1	Z-012983	LOC102547240	gene		D:\assemblies\Rattus_norvegicus-Rnor_6.0-dbSNP149\Rattus_norvegicus-Rnor_6.0-dbSNP149.genometemplate\sequences\NC_005105_chr6.gbk#0	147991367	NC_005105.4	+	7066	47929274..47936339	102547240, 7678865		LOC102547240
Sh3yl1	6.602	13.868	1.213	7.336	2.1007	1.89025	0.165335	0.899819	Z-012998	Sh3yl1	gene		D:\assemblies\Rattus_norvegicus-Rnor_6.0-dbSNP149\Rattus_norvegicus-Rnor_6.0-dbSNP149.genometemplate\sequences\NC_005105_chr6.gbk#0	147991367	NC_005105.4	+	43725	49851778..49895502	362724, 1306440		Sh3yl1
LOC102555048	0.001	0.003	0.044	0.001	3.43513	3.43513	46.7368	1	Z-013001	LOC102555048	gene		D:\assemblies\Rattus_norvegicus-Rnor_6.0-dbSNP149\Rattus_norvegicus-Rnor_6.0-dbSNP149.genometemplate\sequences\NC_005105_chr6.gbk#0	147991367	NC_005105.4	-	89889	50370748..50280860	102555048, 7502861		LOC102555048
LOC102555103	0.001	0.001	0.078	0.001	1	1	82.4168	1	Z-013002	LOC102555103	gene		D:\assemblies\Rattus_norvegicus-Rnor_6.0-dbSNP149\Rattus_norvegicus-Rnor_6.0-dbSNP149.genometemplate\sequences\NC_005105_chr6.gbk#0	147991367	NC_005105.4	-	9961	50388066..50378106	102555103, 7747059		LOC102555103
Slc26a3	0.019	0.006	0.001	0.112	0.327328	0.0551688	0.00843571	0.168543	Z-013005	Slc26a3	gene		D:\assemblies\Rattus_norvegicus-Rnor_6.0-dbSNP149\Rattus_norvegicus-Rnor_6.0-dbSNP149.genometemplate\sequences\NC_005105_chr6.gbk#0	147991367	NC_005105.4	+	41222	50725085..50766306	114629, 620623		Slc26a3
[truncated: 1,906 more rows]
