# Supplementary material for: Hemmule: A Novel Structure with the Properties of the Stem Cell Niche
Source: Preprints.org preprint supplement (doi:10.20944/preprints201906.0206.v1), 2019-06-21
Supplement: Supplementary file 5 [file S1 Table 5 HvsBV99%confidenceAND8-foldchange.xlsx]

## Sheet: HvsBloodVessel99percentconfide
Name	BVl - linear total RPKM	BM - linear total RPKM	LN - linear total RPKM	H - linear total RPKM	Fold change BV vs BM	Fold change H vs BM	Fold change H vs LN	Fold change H vs BV	QSeq ID	/qseq_name	Feature Type	Notes	Source File	Source Seq Length	Source Sequence	Strand	Target Length	Target Range	/db_xref	/exception	/gene	/gene_synonym
Gng8	0.001	11.026	1.627	1.899	11665.7	5.80677	0.856943	0.000497765	Z-000977	Gng8	gene		D:\assemblies\Rattus_norvegicus-Rnor_6.0-dbSNP149\Rattus_norvegicus-Rnor_6.0-dbSNP149.genometemplate\sequences\NC_005100_chr1.gbk#0	282763074	NC_005100.4	+	3865	78818360..78822224	245986, 620808		Gng8
LOC102553424	0.001	0.005	0.003	0.268	5.68852	0.0200644	0.012706	0.00352717	Z-001010	LOC102553424	gene		D:\assemblies\Rattus_norvegicus-Rnor_6.0-dbSNP149\Rattus_norvegicus-Rnor_6.0-dbSNP149.genometemplate\sequences\NC_005100_chr1.gbk#0	282763074	NC_005100.4	-	24361	80028841..80004481	102553424, 7528935		LOC102553424
Igsf23	0.001	0.752	0.277	0.124	795.923	6.07107	2.23654	0.00762772	Z-001061	Igsf23	gene		D:\assemblies\Rattus_norvegicus-Rnor_6.0-dbSNP149\Rattus_norvegicus-Rnor_6.0-dbSNP149.genometemplate\sequences\NC_005100_chr1.gbk#0	282763074	NC_005100.4	-	18699	80869481..80850783	502306, 1564357		Igsf23
LOC108349600	0.001	0.009	0.005	0.237	9.10937	0.0364023	0.0216568	0.00399614	Z-001994	LOC108349600	gene		D:\assemblies\Rattus_norvegicus-Rnor_6.0-dbSNP149\Rattus_norvegicus-Rnor_6.0-dbSNP149.genometemplate\sequences\NC_005100_chr1.gbk#0	282763074	NC_005100.4	-	1916	142836260..142834345	108349600		LOC108349600
Phlda2	0.001	0.001	0.686	0.324	1	0.00291896	2.11748	0.00291896	Z-003180	Phlda2	gene		D:\assemblies\Rattus_norvegicus-Rnor_6.0-dbSNP149\Rattus_norvegicus-Rnor_6.0-dbSNP149.genometemplate\sequences\NC_005100_chr1.gbk#0	282763074	NC_005100.4	-	3135	216704479..216701345	293637, 1304755		Phlda2
Gna14	0.001	0.055	0.251	0.421	57.9737	0.130011	0.595457	0.00224258	Z-003679	Gna14	gene		D:\assemblies\Rattus_norvegicus-Rnor_6.0-dbSNP149\Rattus_norvegicus-Rnor_6.0-dbSNP149.genometemplate\sequences\NC_005100_chr1.gbk#0	282763074	NC_005100.4	+	182212	235165775..235347986	309242, 1308122		Gna14	Tieg3
Npr3	0.001	0.059	0.018	0.228	62.9543	0.260691	0.0770922	0.00414095	Z-004651	Npr3	gene		D:\assemblies\Rattus_norvegicus-Rnor_6.0-dbSNP149\Rattus_norvegicus-Rnor_6.0-dbSNP149.genometemplate\sequences\NC_005101_chr2.gbk#0	266435125	NC_005101.4	-	66346	61950291..61883946	25339, 3196		Npr3	ANP-CR, NPRC
LOC102552069	0.001	0.012	1.695	0.627	12.5903	0.0189688	2.70222	0.00150662	Z-004948	LOC102552069	gene		D:\assemblies\Rattus_norvegicus-Rnor_6.0-dbSNP149\Rattus_norvegicus-Rnor_6.0-dbSNP149.genometemplate\sequences\NC_005101_chr2.gbk#0	266435125	NC_005101.4	+	8517	122520921..122529437	102552069, 7556623		LOC102552069
LOC102553085	0.001	0.012	1.695	0.627	12.5903	0.0189688	2.70222	0.00150662	Z-004951	LOC102553085	gene		D:\assemblies\Rattus_norvegicus-Rnor_6.0-dbSNP149\Rattus_norvegicus-Rnor_6.0-dbSNP149.genometemplate\sequences\NC_005101_chr2.gbk#0	266435125	NC_005101.4	+	8517	122641859..122650375	102553085, 7631924		LOC102553085
Gpr61	0.001	0.527	0.039	0.067	557.426	7.81811	0.579816	0.0140254	Z-005899	Gpr61	gene		D:\assemblies\Rattus_norvegicus-Rnor_6.0-dbSNP149\Rattus_norvegicus-Rnor_6.0-dbSNP149.genometemplate\sequences\NC_005101_chr2.gbk#0	266435125	NC_005101.4	-	6439	210943727..210937289	310780, 1310176		Gpr61
Extl2	0.001	0.056	0.005	0.295	59.4127	0.190611	0.0160132	0.00320826	Z-005949	Extl2	gene		D:\assemblies\Rattus_norvegicus-Rnor_6.0-dbSNP149\Rattus_norvegicus-Rnor_6.0-dbSNP149.genometemplate\sequences\NC_005101_chr2.gbk#0	266435125	NC_005101.4	+	21465	218951112..218972576	310803, 1307684		Extl2
LOC103691708	0.001	0.119	0.008	0.514	125.943	0.231442	0.0151373	0.00183766	Z-006088	LOC103691708	gene		D:\assemblies\Rattus_norvegicus-Rnor_6.0-dbSNP149\Rattus_norvegicus-Rnor_6.0-dbSNP149.genometemplate\sequences\NC_005101_chr2.gbk#0	266435125	NC_005101.4	+	1012	236260581..236261592	103691708, 9101519		LOC103691708
LOC102550300	0.001	0.013	0.764	0.86	14.0105	0.0153885	0.887573	0.00109835	Z-006262	LOC102550300	gene		D:\assemblies\Rattus_norvegicus-Rnor_6.0-dbSNP149\Rattus_norvegicus-Rnor_6.0-dbSNP149.genometemplate\sequences\NC_005101_chr2.gbk#0	266435125	NC_005101.4	-	444	254507879..254507436	102550300, 7543942		LOC102550300
LOC102554660	0.292	0.009	1.157	0.001	0.0312547	9.6492	1223.88	308.728	Z-006770	LOC102554660	gene		D:\assemblies\Rattus_norvegicus-Rnor_6.0-dbSNP149\Rattus_norvegicus-Rnor_6.0-dbSNP149.genometemplate\sequences\NC_005102_chr3.gbk#0	177699992	NC_005102.4	+	728	18060465..18061192	102554660		LOC102554660
LOC102555397	0.292	0.009	1.157	0.001	0.0312547	9.6492	1223.88	308.728	Z-006776	LOC102555397	gene		D:\assemblies\Rattus_norvegicus-Rnor_6.0-dbSNP149\Rattus_norvegicus-Rnor_6.0-dbSNP149.genometemplate\sequences\NC_005102_chr3.gbk#0	177699992	NC_005102.4	+	728	18501895..18502622	102555397		LOC102555397
LOC108350465	0.001	0.428	0.015	0.142	452.496	3.00717	0.103706	0.00664573	Z-008029	LOC108350465	gene		D:\assemblies\Rattus_norvegicus-Rnor_6.0-dbSNP149\Rattus_norvegicus-Rnor_6.0-dbSNP149.genometemplate\sequences\NC_005102_chr3.gbk#0	177699992	NC_005102.4	-	7706	124085227..124077522	108350465		LOC108350465
LOC102551821	0.001	0.007	0.001	0.249	6.90296	0.0262283	0.00379958	0.00379958	Z-008370	LOC102551821	gene		D:\assemblies\Rattus_norvegicus-Rnor_6.0-dbSNP149\Rattus_norvegicus-Rnor_6.0-dbSNP149.genometemplate\sequences\NC_005102_chr3.gbk#0	177699992	NC_005102.4	-	10338	152886391..152876054	102551821, 7616921		LOC102551821
Wfdc15b	0.001	0.001	0.01	0.666	1	0.00141922	0.0153805	0.00141922	Z-008495	Wfdc15b	gene		D:\assemblies\Rattus_norvegicus-Rnor_6.0-dbSNP149\Rattus_norvegicus-Rnor_6.0-dbSNP149.genometemplate\sequences\NC_005102_chr3.gbk#0	177699992	NC_005102.4	-	10154	160617212..160607059	408230, 1303042		Wfdc15b	Pi3, Serpina1c, Skalp, Wfdc14
Peg10	0.001	0.031	0.001	0.186	32.8499	0.167231	0.00509076	0.00509076	Z-009073	Peg10	gene		D:\assemblies\Rattus_norvegicus-Rnor_6.0-dbSNP149\Rattus_norvegicus-Rnor_6.0-dbSNP149.genometemplate\sequences\NC_005103_chr4.gbk#0	184226339	NC_005103.4	+	8994	29795524..29804517	102553587, 1595574		Peg10
LOC102548450	0.167	0.041	1.269	0.001	0.244522	43.1724	1342.79	176.558	Z-010163	LOC102548450	gene		D:\assemblies\Rattus_norvegicus-Rnor_6.0-dbSNP149\Rattus_norvegicus-Rnor_6.0-dbSNP149.genometemplate\sequences\NC_005103_chr4.gbk#0	184226339	NC_005103.4	+	3098	145373527..145376624	102548450, 7499834		LOC102548450
LOC691919	0.001	1.964	0.001	0.442	2078.14	4.4422	0.00213759	0.00213759	Z-013960	LOC691919	gene		D:\assemblies\Rattus_norvegicus-Rnor_6.0-dbSNP149\Rattus_norvegicus-Rnor_6.0-dbSNP149.genometemplate\sequences\NC_005105_chr6.gbk#0	147991367	NC_005105.4	-	518	142479986..142479469	691919, 1593361		LOC691919
LOC108351605	0.015	0.018	0.016	0.001	1.20122	18.7839	17.117	15.6374	Z-015096	LOC108351605	gene		D:\assemblies\Rattus_norvegicus-Rnor_6.0-dbSNP149\Rattus_norvegicus-Rnor_6.0-dbSNP149.genometemplate\sequences\NC_005106_chr7.gbk#0	145729302	NC_005106.4	-	31671	99570178..99538508	108351605		LOC108351605
LOC102549491	0.001	0.007	0.18	0.075	7.7814	0.0981965	2.40924	0.0126194	Z-015745	LOC102549491	gene		D:\assemblies\Rattus_norvegicus-Rnor_6.0-dbSNP149\Rattus_norvegicus-Rnor_6.0-dbSNP149.genometemplate\sequences\NC_005106_chr7.gbk#0	145729302	NC_005106.4	-	22104	141591682..141569579	102549491, 7623601		LOC102549491
LOC102554551	0.001	0.424	0.004	0.07	448.997	6.09627	0.0642451	0.0135775	Z-016961	LOC102554551	gene		D:\assemblies\Rattus_norvegicus-Rnor_6.0-dbSNP149\Rattus_norvegicus-Rnor_6.0-dbSNP149.genometemplate\sequences\NC_005107_chr8.gbk#0	133307652	NC_005107.4	+	165421	79871251..80036671	102554551, 7552397		LOC102554551
LOC100912348	0.001	0.001	0.001	0.017	1	0.0542618	0.0542618	0.0542618	Z-018013	LOC100912348	gene		D:\assemblies\Rattus_norvegicus-Rnor_6.0-dbSNP149\Rattus_norvegicus-Rnor_6.0-dbSNP149.genometemplate\sequences\NC_005108_chr9.gbk#0	122095297	NC_005108.4	+	11992	37749031..37761022	100912348, 6487168		LOC100912348
Cd28	0.399	0.006	0.367	0.001	0.014807	6.24474	388.575	421.742	Z-018264	Cd28	gene		D:\assemblies\Rattus_norvegicus-Rnor_6.0-dbSNP149\Rattus_norvegicus-Rnor_6.0-dbSNP149.genometemplate\sequences\NC_005108_chr9.gbk#0	122095297	NC_005108.4	+	27451	67546408..67573858	25660, 2299		Cd28	CD28RNA
Dusp28	0.001	0.093	1.171	0.863	98.2816	0.107689	1.35716	0.00109572	Z-018627	Dusp28	gene		D:\assemblies\Rattus_norvegicus-Rnor_6.0-dbSNP149\Rattus_norvegicus-Rnor_6.0-dbSNP149.genometemplate\sequences\NC_005108_chr9.gbk#0	122095297	NC_005108.4	+	6067	100072421..100078487	684024, 1595220		Dusp28
Dlgap1	0.001	0.009	0.004	0.121	9.16701	0.0713518	0.0317821	0.00778354	Z-018772	Dlgap1	gene		D:\assemblies\Rattus_norvegicus-Rnor_6.0-dbSNP149\Rattus_norvegicus-Rnor_6.0-dbSNP149.genometemplate\sequences\NC_005108_chr9.gbk#0	122095297	NC_005108.4	+	882762	118277046..119159807	65040, 620223		Dlgap1	DAP-1, Gkap, GKAP/SAPAP1, rGKAP, SAPAP1
LOC103693277	0.148	0.057	0.005	0.001	0.380841	59.7952	5.71286	157.008	Z-018943	LOC103693277	gene		D:\assemblies\Rattus_norvegicus-Rnor_6.0-dbSNP149\Rattus_norvegicus-Rnor_6.0-dbSNP149.genometemplate\sequences\NC_005109_chr10.gbk#0	112626471	NC_005109.4	+	11786	11570690..11582475	103693277, 9330198		LOC103693277
Cldn9	0.001	0.099	0.044	0.309	104.871	0.320558	0.140889	0.0030567	Z-019002	Cldn9	gene		D:\assemblies\Rattus_norvegicus-Rnor_6.0-dbSNP149\Rattus_norvegicus-Rnor_6.0-dbSNP149.genometemplate\sequences\NC_005109_chr10.gbk#0	112626471	NC_005109.4	-	1432	13004441..13003010	287099, 1308999		Cldn9
LOC108352144	0.001	0.057	0.001	0.426	60.5736	0.134374	0.00221836	0.00221836	Z-020684	LOC108352144	gene		D:\assemblies\Rattus_norvegicus-Rnor_6.0-dbSNP149\Rattus_norvegicus-Rnor_6.0-dbSNP149.genometemplate\sequences\NC_005109_chr10.gbk#0	112626471	NC_005109.4	+	37441	93679044..93716484	108352144		LOC108352144
RGD1562726	0.001	0.01	0.001	0.833	10.6836	0.0121179	0.00113425	0.00113425	Z-021224	RGD1562726	gene		D:\assemblies\Rattus_norvegicus-Rnor_6.0-dbSNP149\Rattus_norvegicus-Rnor_6.0-dbSNP149.genometemplate\sequences\NC_005110_chr11.gbk#0	90463843	NC_005110.4	-	17930	31238495..31220566	498060, 1562726		RGD1562726
Tbx1	0.001	0.142	2.941	1.003	149.943	0.141228	2.93051	0.000941881	Z-021852	Tbx1	gene		D:\assemblies\Rattus_norvegicus-Rnor_6.0-dbSNP149\Rattus_norvegicus-Rnor_6.0-dbSNP149.genometemplate\sequences\NC_005110_chr11.gbk#0	90463843	NC_005110.4	+	9626	86552022..86561647	360737, 1307734		Tbx1
Cldn3	0.754	0.043	0.001	0.001	0.0570395	45.5285	1	798.193	Z-022327	Cldn3	gene		D:\assemblies\Rattus_norvegicus-Rnor_6.0-dbSNP149\Rattus_norvegicus-Rnor_6.0-dbSNP149.genometemplate\sequences\NC_005111_chr12.gbk#0	52716770	NC_005111.4	-	1473	21832813..21831341	65130, 68425		Cldn3
LOC108352432	0.001	0.415	0.005	0.295	439.6	1.40897	0.0184018	0.00320512	Z-022344	LOC108352432	gene		D:\assemblies\Rattus_norvegicus-Rnor_6.0-dbSNP149\Rattus_norvegicus-Rnor_6.0-dbSNP149.genometemplate\sequences\NC_005111_chr12.gbk#0	52716770	NC_005111.4	-	19438	22165080..22145643	108352432		LOC108352432
LOC102553558	0.001	0.049	0.15	0.253	51.7756	0.193307	0.594171	0.00373355	Z-022431	LOC102553558	gene		D:\assemblies\Rattus_norvegicus-Rnor_6.0-dbSNP149\Rattus_norvegicus-Rnor_6.0-dbSNP149.genometemplate\sequences\NC_005111_chr12.gbk#0	52716770	NC_005111.4	-	1972	25150352..25148381	102553558, 7689818		LOC102553558
Syna	0.001	0.351	0.004	0.137	371.657	2.56027	0.0278801	0.00688879	Z-022432	Syna	gene		D:\assemblies\Rattus_norvegicus-Rnor_6.0-dbSNP149\Rattus_norvegicus-Rnor_6.0-dbSNP149.genometemplate\sequences\NC_005111_chr12.gbk#0	52716770	NC_005111.4	+	7053	25161130..25168182	288602, 1563240		Syna	Gm52
Sft2d2	0.001	0.001	0.319	0.427	1	0.0022154	0.748608	0.0022154	Z-023355	Sft2d2	gene		D:\assemblies\Rattus_norvegicus-Rnor_6.0-dbSNP149\Rattus_norvegicus-Rnor_6.0-dbSNP149.genometemplate\sequences\NC_005112_chr13.gbk#0	114033958	NC_005112.4	-	19265	83457899..83438635	360868, 1310623		Sft2d2	RGD1310623
Dok7	0.001	0.018	0.003	0.117	19.3458	0.155939	0.0274411	0.00806059	Z-024480	Dok7	gene		D:\assemblies\Rattus_norvegicus-Rnor_6.0-dbSNP149\Rattus_norvegicus-Rnor_6.0-dbSNP149.genometemplate\sequences\NC_005113_chr14.gbk#0	115493446	NC_005113.4	-	38046	80963454..80925409	305448, 1566416		Dok7	RGD1566416
Cdh24	0.001	0.009	0.139	0.086	9.82688	0.10775	1.61283	0.0109648	Z-025334	Cdh24	gene		D:\assemblies\Rattus_norvegicus-Rnor_6.0-dbSNP149\Rattus_norvegicus-Rnor_6.0-dbSNP149.genometemplate\sequences\NC_005114_chr15.gbk#0	111246239	NC_005114.4	-	9702	33287546..33277845	498515, 1560161		Cdh24
Lrrc63	0.001	0.04	0.026	0.176	42.0094	0.22561	0.146121	0.00537047	Z-025700	Lrrc63	gene		D:\assemblies\Rattus_norvegicus-Rnor_6.0-dbSNP149\Rattus_norvegicus-Rnor_6.0-dbSNP149.genometemplate\sequences\NC_005114_chr15.gbk#0	111246239	NC_005114.4	-	37961	57170467..57132507	364427, 1559507		Lrrc63
LOC108348385	0.085	0.005	0.001	0.001	0.0562584	5.08558	1	90.3967	Z-026201	LOC108348385	gene		D:\assemblies\Rattus_norvegicus-Rnor_6.0-dbSNP149\Rattus_norvegicus-Rnor_6.0-dbSNP149.genometemplate\sequences\NC_005115_chr16.gbk#0	90668790	NC_005115.4	+	14374	19407532..19421905	108348385		LOC108348385
RGD1561671	0.001	0.017	0.163	0.803	18.2206	0.0214497	0.202923	0.00117722	Z-027034	RGD1561671	gene		D:\assemblies\Rattus_norvegicus-Rnor_6.0-dbSNP149\Rattus_norvegicus-Rnor_6.0-dbSNP149.genometemplate\sequences\NC_005116_chr17.gbk#0	90843779	NC_005116.4	-	680	11916026..11915347	361214, 1561671		RGD1561671
LOC100909899	0.001	0.001	0.001	0.017	1	0.0542618	0.0542618	0.0542618	Z-028553	LOC100909899	gene		D:\assemblies\Rattus_norvegicus-Rnor_6.0-dbSNP149\Rattus_norvegicus-Rnor_6.0-dbSNP149.genometemplate\sequences\NC_005117_chr18.gbk#0	88201929	NC_005117.4	-	11987	78660097..78648111	100909899, 6501465		LOC100909899
LOC103694288	0.001	0.246	0.018	0.49	259.887	0.501714	0.0364915	0.00193051	Z-028742	LOC103694288	gene		D:\assemblies\Rattus_norvegicus-Rnor_6.0-dbSNP149\Rattus_norvegicus-Rnor_6.0-dbSNP149.genometemplate\sequences\NC_005118_chr19.gbk#0	62275575	NC_005118.4	+	13367	14432261..14445627	103694288, 9215808		LOC103694288
LOC108353220	0.001	1.115	0.25	0.323	1179.41	3.44919	0.775002	0.00292451	Z-028940	LOC108353220	gene		D:\assemblies\Rattus_norvegicus-Rnor_6.0-dbSNP149\Rattus_norvegicus-Rnor_6.0-dbSNP149.genometemplate\sequences\NC_005118_chr19.gbk#0	62275575	NC_005118.4	-	2152	26980201..26978050	108353220		LOC108353220
Kiaa0895l	0.001	0.012	0.001	0.181	12.6709	0.0661354	0.00521946	0.00521946	Z-029054	Kiaa0895l	gene		D:\assemblies\Rattus_norvegicus-Rnor_6.0-dbSNP149\Rattus_norvegicus-Rnor_6.0-dbSNP149.genometemplate\sequences\NC_005118_chr19.gbk#0	62275575	NC_005118.4	-	8734	37245217..37236484	688736, 1585272		Kiaa0895l
Agrp	0.001	0.014	0.56	0.327	14.9096	0.0431411	1.71389	0.00289351	Z-029071	Agrp	gene		D:\assemblies\Rattus_norvegicus-Rnor_6.0-dbSNP149\Rattus_norvegicus-Rnor_6.0-dbSNP149.genometemplate\sequences\NC_005118_chr19.gbk#0	62275575	NC_005118.4	-	58935	37584875..37525941	25582, 2068		Agrp
Tsnaxip1	0.001	0.042	0.016	0.233	44.8082	0.181805	0.0679371	0.0040574	Z-029083	Tsnaxip1	gene		D:\assemblies\Rattus_norvegicus-Rnor_6.0-dbSNP149\Rattus_norvegicus-Rnor_6.0-dbSNP149.genometemplate\sequences\NC_005118_chr19.gbk#0	62275575	NC_005118.4	+	17993	37795432..37813424	498944, 1565341		Tsnaxip1	RGD1565341
