# Supplementary material for: Hemmule: A Novel Structure with the Properties of the Stem Cell Niche
Source: Preprints.org preprint supplement (doi:10.20944/preprints201906.0206.v1), 2019-06-21
Supplement: Supplementary file 6 [file S1 Table 6 HvsBoneMarrow99%confidenceAND8-foldchange.xlsx]

## Sheet: HvsBoneMarrow99percentconfiden
Name	BV - linear total RPKM	BM - linear total RPKM	LN - linear total RPKM	H - linear total RPKM	Fold change BV vs BM	Fold change H vs BM	Fold change H vs LN	Fold change H vs BV	QSeq ID	/qseq_name	Feature Type	Notes	Source File	Source Seq Length	Source Sequence	Strand	Target Length	Target Range	/db_xref	/exception	/gene	/gene_synonym
Phlda2	0.001	0.001	0.686	0.324	1	0.00291896	2.11748	0.00291896	Z-003180	Phlda2	gene		D:\assemblies\Rattus_norvegicus-Rnor_6.0-dbSNP149\Rattus_norvegicus-Rnor_6.0-dbSNP149.genometemplate\sequences\NC_005100_chr1.gbk#0	282763074	NC_005100.4	-	3135	216704479..216701345	293637, 1304755		Phlda2
LOC103691483	0.095	0.685	0.555	0.001	7.18174	724.45	587.485	100.874	Z-004640	LOC103691483	gene		D:\assemblies\Rattus_norvegicus-Rnor_6.0-dbSNP149\Rattus_norvegicus-Rnor_6.0-dbSNP149.genometemplate\sequences\NC_005101_chr2.gbk#0	266435125	NC_005101.4	+	8165	60735521..60743685	103691483, 9387191		LOC103691483
LOC102551838	0.017	0.197	0.055	0.001	11.3499	208.871	57.8318	18.4029	Z-004944	LOC102551838	gene		D:\assemblies\Rattus_norvegicus-Rnor_6.0-dbSNP149\Rattus_norvegicus-Rnor_6.0-dbSNP149.genometemplate\sequences\NC_005101_chr2.gbk#0	266435125	NC_005101.4	-	8247	122299600..122291354	102551838, 7544750		LOC102551838
LOC108350108	0.001	0.294	0.011	0.001	311.398	311.398	11.947	1	Z-006092	LOC108350108	gene		D:\assemblies\Rattus_norvegicus-Rnor_6.0-dbSNP149\Rattus_norvegicus-Rnor_6.0-dbSNP149.genometemplate\sequences\NC_005101_chr2.gbk#0	266435125	NC_005101.4	+	23462	236480703..236504164	108350108		LOC108350108
LOC108350119	0.001	0.398	0.001	0.001	420.96	420.96	1	1	Z-006139	LOC108350119	gene		D:\assemblies\Rattus_norvegicus-Rnor_6.0-dbSNP149\Rattus_norvegicus-Rnor_6.0-dbSNP149.genometemplate\sequences\NC_005101_chr2.gbk#0	266435125	NC_005101.4	+	140443	242314236..242454678	108350119		LOC108350119
LOC102549381	0.005	0.26	0.006	0.001	49.0168	275.305	6.08079	5.61653	Z-006368	LOC102549381	gene		D:\assemblies\Rattus_norvegicus-Rnor_6.0-dbSNP149\Rattus_norvegicus-Rnor_6.0-dbSNP149.genometemplate\sequences\NC_005102_chr3.gbk#0	177699992	NC_005102.4	-	7297	1632307..1625011	102549381, 7632280		LOC102549381
LOC690781	0.001	0.9	0.133	0.001	951.915	951.915	140.899	1	Z-006758	LOC690781	gene		D:\assemblies\Rattus_norvegicus-Rnor_6.0-dbSNP149\Rattus_norvegicus-Rnor_6.0-dbSNP149.genometemplate\sequences\NC_005102_chr3.gbk#0	177699992	NC_005102.4	+	814	17427718..17428531	690781		LOC690781
LOC108350378	0.005	0.085	0.045	0.001	16.859	89.7198	47.6695	5.32177	Z-006980	LOC108350378	gene		D:\assemblies\Rattus_norvegicus-Rnor_6.0-dbSNP149\Rattus_norvegicus-Rnor_6.0-dbSNP149.genometemplate\sequences\NC_005102_chr3.gbk#0	177699992	NC_005102.4	-	27992	45554205..45526214	108350378		LOC108350378
LOC108351272	0.001	0.856	0.02	0.001	905.907	905.907	21.0268	1	Z-013426	LOC108351272	gene		D:\assemblies\Rattus_norvegicus-Rnor_6.0-dbSNP149\Rattus_norvegicus-Rnor_6.0-dbSNP149.genometemplate\sequences\NC_005105_chr6.gbk#0	147991367	NC_005105.4	-	7108	107596648..107589541	108351272		LOC108351272
LOC102551996	0.005	0.324	0.005	0.001	60.5022	343.01	5.36203	5.66938	Z-014199	LOC102551996	gene		D:\assemblies\Rattus_norvegicus-Rnor_6.0-dbSNP149\Rattus_norvegicus-Rnor_6.0-dbSNP149.genometemplate\sequences\NC_005106_chr7.gbk#0	145729302	NC_005106.4	-	14219	10959125..10944907	102551996, 7693709		LOC102551996
Inhbc	0.001	0.618	0.001	0.001	653.568	653.568	1	1	Z-014895	Inhbc	gene		D:\assemblies\Rattus_norvegicus-Rnor_6.0-dbSNP149\Rattus_norvegicus-Rnor_6.0-dbSNP149.genometemplate\sequences\NC_005106_chr7.gbk#0	145729302	NC_005106.4	-	13471	70661475..70648005	64549, 621194		Inhbc
Rab6b	0.074	0.001	0.058	0.331	0.0128498	0.00285377	0.175683	0.222087	Z-017213	Rab6b	gene		D:\assemblies\Rattus_norvegicus-Rnor_6.0-dbSNP149\Rattus_norvegicus-Rnor_6.0-dbSNP149.genometemplate\sequences\NC_005107_chr8.gbk#0	133307652	NC_005107.4	+	68443	111600375..111668817	363123, 1309958		Rab6b
Prss44	0.001	0.552	0.001	0.001	584.332	584.332	1	1	Z-017400	Prss44	gene		D:\assemblies\Rattus_norvegicus-Rnor_6.0-dbSNP149\Rattus_norvegicus-Rnor_6.0-dbSNP149.genometemplate\sequences\NC_005107_chr8.gbk#0	133307652	NC_005107.4	+	13808	119083900..119097707	501060, 1560940		Prss44	RGD1560940, Tessp4
LOC100362987	0.001	0.89	1.489	0.001	941.361	941.361	1575.64	1	Z-017725	LOC100362987	gene		D:\assemblies\Rattus_norvegicus-Rnor_6.0-dbSNP149\Rattus_norvegicus-Rnor_6.0-dbSNP149.genometemplate\sequences\NC_005108_chr9.gbk#0	122095297	NC_005108.4	-	322	10737845..10737524	100362987, 2323707		LOC100362987
LOC100912348	0.001	0.001	0.001	0.017	1	0.0542618	0.0542618	0.0542618	Z-018013	LOC100912348	gene		D:\assemblies\Rattus_norvegicus-Rnor_6.0-dbSNP149\Rattus_norvegicus-Rnor_6.0-dbSNP149.genometemplate\sequences\NC_005108_chr9.gbk#0	122095297	NC_005108.4	+	11992	37749031..37761022	100912348, 6487168		LOC100912348
LOC103690585	0.011	0.231	0.02	0.001	21.5892	243.938	20.7697	11.2991	Z-018714	LOC103690585	gene		D:\assemblies\Rattus_norvegicus-Rnor_6.0-dbSNP149\Rattus_norvegicus-Rnor_6.0-dbSNP149.genometemplate\sequences\NC_005108_chr9.gbk#0	122095297	NC_005108.4	+	9162	113276230..113285391	103690585, 9090471		LOC103690585
Ntn1	0.006	0.001	0.016	0.111	0.153035	0.00848303	0.14588	0.0554321	Z-019689	Ntn1	gene		D:\assemblies\Rattus_norvegicus-Rnor_6.0-dbSNP149\Rattus_norvegicus-Rnor_6.0-dbSNP149.genometemplate\sequences\NC_005109_chr10.gbk#0	112626471	NC_005109.4	-	220148	54982072..54761925	114523, 619809		Ntn1	netrin-1
LOC102548829	0.031	0.001	0.001	0.378	0.0302789	0.00250051	0.00250051	0.0825826	Z-021449	LOC102548829	gene		D:\assemblies\Rattus_norvegicus-Rnor_6.0-dbSNP149\Rattus_norvegicus-Rnor_6.0-dbSNP149.genometemplate\sequences\NC_005110_chr11.gbk#0	90463843	NC_005110.4	-	28869	52838816..52809948	102548829, 7583323		LOC102548829
Nxpe5	0.009	0.712	0.43	0.001	77.1247	752.911	455.136	9.76225	Z-022272	Nxpe5	gene		D:\assemblies\Rattus_norvegicus-Rnor_6.0-dbSNP149\Rattus_norvegicus-Rnor_6.0-dbSNP149.genometemplate\sequences\NC_005111_chr12.gbk#0	52716770	NC_005111.4	-	11842	19440791..19428950	680711, 1588255		Nxpe5
Sft2d2	0.001	0.001	0.319	0.427	1	0.0022154	0.748608	0.0022154	Z-023355	Sft2d2	gene		D:\assemblies\Rattus_norvegicus-Rnor_6.0-dbSNP149\Rattus_norvegicus-Rnor_6.0-dbSNP149.genometemplate\sequences\NC_005112_chr13.gbk#0	114033958	NC_005112.4	-	19265	83457899..83438635	360868, 1310623		Sft2d2	RGD1310623
Pla2g3	0.017	1.087	0.017	0.001	62.6284	1149.67	17.5019	18.357	Z-024535	Pla2g3	gene		D:\assemblies\Rattus_norvegicus-Rnor_6.0-dbSNP149\Rattus_norvegicus-Rnor_6.0-dbSNP149.genometemplate\sequences\NC_005113_chr14.gbk#0	115493446	NC_005113.4	+	5787	83724828..83730614	289733, 1305323		Pla2g3
LOC100909899	0.001	0.001	0.001	0.017	1	0.0542618	0.0542618	0.0542618	Z-028553	LOC100909899	gene		D:\assemblies\Rattus_norvegicus-Rnor_6.0-dbSNP149\Rattus_norvegicus-Rnor_6.0-dbSNP149.genometemplate\sequences\NC_005117_chr18.gbk#0	88201929	NC_005117.4	-	11987	78660097..78648111	100909899, 6501465		LOC100909899
Fam26d	0.001	0.344	0.201	0.001	364.013	364.013	212.87	1	Z-030052	Fam26d	gene		D:\assemblies\Rattus_norvegicus-Rnor_6.0-dbSNP149\Rattus_norvegicus-Rnor_6.0-dbSNP149.genometemplate\sequences\NC_005119_chr20.gbk#0	56205956	NC_005119.4	-	4461	27578269..27573809	499445, 1595701		Fam26d
Cnksr2	0.025	0.001	0.003	0.157	0.0375976	0.00602051	0.0216425	0.16013	Z-030601	Cnksr2	gene		D:\assemblies\Rattus_norvegicus-Rnor_6.0-dbSNP149\Rattus_norvegicus-Rnor_6.0-dbSNP149.genometemplate\sequences\NC_005120_chrX.gbk#0	159970021	NC_005120.4	+	242860	39711001..39953860	59322, 708454		Cnksr2
