# Supplementary material for: Hemmule: A Novel Structure with the Properties of the Stem Cell Niche
Source: Preprints.org preprint supplement (doi:10.20944/preprints201906.0206.v1), 2019-06-21
Supplement: Supplementary file 7 [file S1 Table 7 HvsLN99%confidenceAND8-foldchange.xlsx]

## Sheet: HvsLymphNode99percentconfidenc
Name	Bloodvessel total RPKM	Bonemarrow - linear total RPKM	Lymphnode - linear total RPKM	H - linear total RPKM	Fold change BV vs BM	Fold change H vs BM	Fold change H vs LN	Fold change H vs BV	QSeq ID	/qseq_name	Feature Type	Notes	Source File	Source Seq Length	Source Sequence	Strand	Target Length	Target Range	/db_xref	/exception	/gene	/gene_synonym
Rnr1	22279.6	22982.6	2042.28	18314.5	1.03155	1.25489	0.111512	1.2165	Z-000002	Rnr1	gene		D:\assemblies\Rattus_norvegicus-Rnor_6.0-dbSNP149\Rattus_norvegicus-Rnor_6.0-dbSNP149.genometemplate\sequences\NC_001665_chrMT.gbk#0	16313	NC_001665.2	+	958	68..1025	170602		Rnr1	mt-Rnr1
Vom2r6	0.001	0.008	0.071	0.001	8.08067	8.08067	75.179	1	Z-000049	Vom2r6	gene		D:\assemblies\Rattus_norvegicus-Rnor_6.0-dbSNP149\Rattus_norvegicus-Rnor_6.0-dbSNP149.genometemplate\sequences\NC_005100_chr1.gbk#0	282763074	NC_005100.4	-	11030	755645..744616	308257, 1562697		Vom2r6	RGD1562697
LOC103690937	0.001	0.001	1.907	0.001	1	1	2017.83	1	Z-000062	LOC103690937	gene		D:\assemblies\Rattus_norvegicus-Rnor_6.0-dbSNP149\Rattus_norvegicus-Rnor_6.0-dbSNP149.genometemplate\sequences\NC_005100_chr1.gbk#0	282763074	NC_005100.4	+	5594	1637755..1643348	103690937, 9287253		LOC103690937
LOC102547024	0.003	0.003	0.042	0.001	0.932445	3.165	44.0143	3.3943	Z-000087	LOC102547024	gene		D:\assemblies\Rattus_norvegicus-Rnor_6.0-dbSNP149\Rattus_norvegicus-Rnor_6.0-dbSNP149.genometemplate\sequences\NC_005100_chr1.gbk#0	282763074	NC_005100.4	-	18604	5337229..5318626	102547024, 7501317		LOC102547024
LOC103690923	0.007	0.156	0.001	0.589	23.6117	0.265124	0.00160536	0.0112285	Z-000141	LOC103690923	gene		D:\assemblies\Rattus_norvegicus-Rnor_6.0-dbSNP149\Rattus_norvegicus-Rnor_6.0-dbSNP149.genometemplate\sequences\NC_005100_chr1.gbk#0	282763074	NC_005100.4	-	10353	12768190..12757838	103690923, 9250034		LOC103690923
Slc35d3	0.444	1.959	0.001	0.514	4.41142	3.81388	0.00184038	0.864547	Z-000175	Slc35d3	gene		D:\assemblies\Rattus_norvegicus-Rnor_6.0-dbSNP149\Rattus_norvegicus-Rnor_6.0-dbSNP149.genometemplate\sequences\NC_005100_chr1.gbk#0	282763074	NC_005100.4	-	3473	15301998..15298526	308717, 1309428		Slc35d3
LOC108349727	0.001	0.001	0.289	0.001	1	1	305.938	1	Z-000192	LOC108349727	gene		D:\assemblies\Rattus_norvegicus-Rnor_6.0-dbSNP149\Rattus_norvegicus-Rnor_6.0-dbSNP149.genometemplate\sequences\NC_005100_chr1.gbk#0	282763074	NC_005100.4	-	9523	16968049..16958527	108349727		LOC108349727
Themis	0.001	0.039	0.65	0.001	41.5799	41.5799	687.498	1	Z-000194	Themis	gene		D:\assemblies\Rattus_norvegicus-Rnor_6.0-dbSNP149\Rattus_norvegicus-Rnor_6.0-dbSNP149.genometemplate\sequences\NC_005100_chr1.gbk#0	282763074	NC_005100.4	-	225253	17378225..17152973	498985, 1560849		Themis
Samd3	0.006	0.001	1.687	0.001	0.161814	1	1784.41	6.17992	Z-000204	Samd3	gene		D:\assemblies\Rattus_norvegicus-Rnor_6.0-dbSNP149\Rattus_norvegicus-Rnor_6.0-dbSNP149.genometemplate\sequences\NC_005100_chr1.gbk#0	282763074	NC_005100.4	-	44413	20155960..20111548	685940, 1587834		Samd3
LOC108349248	0.314	0.699	0.001	0.412	2.2252	1.69791	0.00229601	0.763038	Z-000223	LOC108349248	gene		D:\assemblies\Rattus_norvegicus-Rnor_6.0-dbSNP149\Rattus_norvegicus-Rnor_6.0-dbSNP149.genometemplate\sequences\NC_005100_chr1.gbk#0	282763074	NC_005100.4	+	16025	21854553..21870577	108349248		LOC108349248
Moxd1	0.001	0.055	0.164	0.001	57.8753	57.8753	173.908	1	Z-000227	Moxd1	gene		D:\assemblies\Rattus_norvegicus-Rnor_6.0-dbSNP149\Rattus_norvegicus-Rnor_6.0-dbSNP149.genometemplate\sequences\NC_005100_chr1.gbk#0	282763074	NC_005100.4	-	82068	22206565..22124498	294119, 1310033		Moxd1
Lrrc14b	0.01	0.007	0.124	0.001	0.694474	7.45856	131.638	10.7399	Z-000321	Lrrc14b	gene		D:\assemblies\Rattus_norvegicus-Rnor_6.0-dbSNP149\Rattus_norvegicus-Rnor_6.0-dbSNP149.genometemplate\sequences\NC_005100_chr1.gbk#0	282763074	NC_005100.4	+	4172	31531143..31535314	502225, 1564978		Lrrc14b	RGD1564978
Ahrr	0.004	0.005	0.207	0.001	1.17911	5.32525	219.378	4.51634	Z-000325	Ahrr	gene		D:\assemblies\Rattus_norvegicus-Rnor_6.0-dbSNP149\Rattus_norvegicus-Rnor_6.0-dbSNP149.genometemplate\sequences\NC_005100_chr1.gbk#0	282763074	NC_005100.4	+	95033	31603297..31698329	498999, 1559857		Ahrr
LOC102548924	0.001	0.001	1.243	0.001	1	1	1315.43	1	Z-000342	LOC102548924	gene		D:\assemblies\Rattus_norvegicus-Rnor_6.0-dbSNP149\Rattus_norvegicus-Rnor_6.0-dbSNP149.genometemplate\sequences\NC_005100_chr1.gbk#0	282763074	NC_005100.4	+	31903	32299730..32331632	102548924, 7628562		LOC102548924
LOC103690947	0.001	0.001	0.067	0.001	1	1	71.1796	1	Z-000349	LOC103690947	gene		D:\assemblies\Rattus_norvegicus-Rnor_6.0-dbSNP149\Rattus_norvegicus-Rnor_6.0-dbSNP149.genometemplate\sequences\NC_005100_chr1.gbk#0	282763074	NC_005100.4	+	4316	33277555..33281870	103690947, 9115889		LOC103690947
LOC680200	0.047	1.613	6.977	0.361	34.3174	4.47321	19.3472	0.130348	Z-000371	LOC680200	gene		D:\assemblies\Rattus_norvegicus-Rnor_6.0-dbSNP149\Rattus_norvegicus-Rnor_6.0-dbSNP149.genometemplate\sequences\NC_005100_chr1.gbk#0	282763074	NC_005100.4	-	16289	37818879..37802591	680200, 1594231		LOC680200
Mtrf1l	3.407	5.667	23.365	2.848	1.66335	1.99018	8.20531	1.19649	Z-000407	Mtrf1l	gene		D:\assemblies\Rattus_norvegicus-Rnor_6.0-dbSNP149\Rattus_norvegicus-Rnor_6.0-dbSNP149.genometemplate\sequences\NC_005100_chr1.gbk#0	282763074	NC_005100.4	-	10209	42485999..42475791	361473, 1598312		Mtrf1l
LOC102553528	0.001	0.001	0.111	0.001	1	1	117.738	1	Z-000454	LOC102553528	gene		D:\assemblies\Rattus_norvegicus-Rnor_6.0-dbSNP149\Rattus_norvegicus-Rnor_6.0-dbSNP149.genometemplate\sequences\NC_005100_chr1.gbk#0	282763074	NC_005100.4	-	2770	47972459..47969690	102553528, 7683242		LOC102553528
Pacrg	2.854	8.808	0.001	2.751	3.08603	3.20135	0.00034352	1.03737	Z-000475	Pacrg	gene		D:\assemblies\Rattus_norvegicus-Rnor_6.0-dbSNP149\Rattus_norvegicus-Rnor_6.0-dbSNP149.genometemplate\sequences\NC_005100_chr1.gbk#0	282763074	NC_005100.4	+	421051	50070273..50491323	499021, 1561027		Pacrg	RGD1561027
Pde10a	0.025	0.01	0.063	0.001	0.412379	10.9896	67.1571	26.6494	Z-000489	Pde10a	gene		D:\assemblies\Rattus_norvegicus-Rnor_6.0-dbSNP149\Rattus_norvegicus-Rnor_6.0-dbSNP149.genometemplate\sequences\NC_005100_chr1.gbk#0	282763074	NC_005100.4	-	184153	52544448..52360296	63885, 68434		Pde10a	Pde10a3
T	0.001	0.001	0.101	0.001	1	1	106.607	1	Z-000490	T	gene		D:\assemblies\Rattus_norvegicus-Rnor_6.0-dbSNP149\Rattus_norvegicus-Rnor_6.0-dbSNP149.genometemplate\sequences\NC_005100_chr1.gbk#0	282763074	NC_005100.4	-	13625	52900691..52887067	292301, 1310141		T
Rnaset2	14.064	30.625	171.764	17.387	2.17759	1.7614	9.8789	0.808874	Z-000497	Rnaset2	gene		D:\assemblies\Rattus_norvegicus-Rnor_6.0-dbSNP149\Rattus_norvegicus-Rnor_6.0-dbSNP149.genometemplate\sequences\NC_005100_chr1.gbk#0	282763074	NC_005100.4	+	17170	53174879..53192048	292306, 1309918		Rnaset2
LOC108349805	0.364	0.08	9.478	0.264	0.218181	0.300955	35.8725	1.37939	Z-000522	LOC108349805	gene		D:\assemblies\Rattus_norvegicus-Rnor_6.0-dbSNP149\Rattus_norvegicus-Rnor_6.0-dbSNP149.genometemplate\sequences\NC_005100_chr1.gbk#0	282763074	NC_005100.4	-	5223	54426691..54421469	108349805		LOC108349805
LOC678796	0.006	0.01	4.623	0.52	1.70056	0.0194609	8.89287	0.0114438	Z-000523	LOC678796	gene		D:\assemblies\Rattus_norvegicus-Rnor_6.0-dbSNP149\Rattus_norvegicus-Rnor_6.0-dbSNP149.genometemplate\sequences\NC_005100_chr1.gbk#0	282763074	NC_005100.4	-	1022	54456193..54455172	678796, 1596891		LOC678796
Ermard	1.573	1.33	28.441	1.226	0.845641	1.0852	23.2059	1.28329	Z-000560	Ermard	gene		D:\assemblies\Rattus_norvegicus-Rnor_6.0-dbSNP149\Rattus_norvegicus-Rnor_6.0-dbSNP149.genometemplate\sequences\NC_005100_chr1.gbk#0	282763074	NC_005100.4	+	25335	56982742..57008076	361485, 1309374		Ermard
LOC108349526	0.001	0.001	0.331	0.001	1	1	349.764	1	Z-000573	LOC108349526	gene		D:\assemblies\Rattus_norvegicus-Rnor_6.0-dbSNP149\Rattus_norvegicus-Rnor_6.0-dbSNP149.genometemplate\sequences\NC_005100_chr1.gbk#0	282763074	NC_005100.4	-	10703	57682935..57672233	108349526		LOC108349526
Lix1	0.001	0.001	0.156	0.001	1	1	164.807	1	Z-000577	Lix1	gene		D:\assemblies\Rattus_norvegicus-Rnor_6.0-dbSNP149\Rattus_norvegicus-Rnor_6.0-dbSNP149.genometemplate\sequences\NC_005100_chr1.gbk#0	282763074	NC_005100.4	+	56858	59156021..59212878	292381, 1309454		Lix1
Lilrc2	1.496	3.081	0.001	0.563	2.05997	5.4725	0.00167858	2.65659	Z-000658	Lilrc2	gene		D:\assemblies\Rattus_norvegicus-Rnor_6.0-dbSNP149\Rattus_norvegicus-Rnor_6.0-dbSNP149.genometemplate\sequences\NC_005100_chr1.gbk#0	282763074	NC_005100.4	-	5038	63684265..63679228	690906, 1589872		Lilrc2
Lilrb3l	2.554	3.372	0.255	2.699	1.32023	1.24955	0.0943984	0.946467	Z-000661	Lilrb3l	gene		D:\assemblies\Rattus_norvegicus-Rnor_6.0-dbSNP149\Rattus_norvegicus-Rnor_6.0-dbSNP149.genometemplate\sequences\NC_005100_chr1.gbk#0	282763074	NC_005100.4	+	89641	63759638..63849278	361493, 1307219		Lilrb3l	Lilrb3, Pir-A1, Pir-A2, Pirb
Tmc4	0.001	0.001	0.219	0.001	1	1	231.936	1	Z-000675	Tmc4	gene		D:\assemblies\Rattus_norvegicus-Rnor_6.0-dbSNP149\Rattus_norvegicus-Rnor_6.0-dbSNP149.genometemplate\sequences\NC_005100_chr1.gbk#0	282763074	NC_005100.4	+	11890	64114687..64126576	308310, 1304811		Tmc4
Olr1l	0.048	0.965	0.001	0.322	20.1451	2.99451	0.00293316	0.148647	Z-000693	Olr1l	gene		D:\assemblies\Rattus_norvegicus-Rnor_6.0-dbSNP149\Rattus_norvegicus-Rnor_6.0-dbSNP149.genometemplate\sequences\NC_005100_chr1.gbk#0	282763074	NC_005100.4	+	975	64480929..64481903	365170, 1333287		Olr1l	Olr1
Vom2r13	0.003	0.007	0.033	0.001	1.99127	7.30722	34.4047	3.66964	Z-000710	Vom2r13	gene		D:\assemblies\Rattus_norvegicus-Rnor_6.0-dbSNP149\Rattus_norvegicus-Rnor_6.0-dbSNP149.genometemplate\sequences\NC_005100_chr1.gbk#0	282763074	NC_005100.4	+	47454	64928503..64975956	690593, 1594671		Vom2r13
LOC102552250	0.064	0.011	0.969	0.11	0.171892	0.0995185	8.83292	0.578959	Z-000728	LOC102552250	gene		D:\assemblies\Rattus_norvegicus-Rnor_6.0-dbSNP149\Rattus_norvegicus-Rnor_6.0-dbSNP149.genometemplate\sequences\NC_005100_chr1.gbk#0	282763074	NC_005100.4	+	2071	65602266..65604336	102552250, 7591865		LOC102552250
Peg3	1.973	3.192	0.172	3.806	1.61768	0.838526	0.0452562	0.518351	Z-000806	Peg3	gene		D:\assemblies\Rattus_norvegicus-Rnor_6.0-dbSNP149\Rattus_norvegicus-Rnor_6.0-dbSNP149.genometemplate\sequences\NC_005100_chr1.gbk#0	282763074	NC_005100.4	+	26641	70210810..70237450	103691034, 2323590		Peg3
Apeg3	3.939	7.612	0.225	4.315	1.93239	1.76395	0.0521987	0.912834	Z-000807	Apeg3	gene		D:\assemblies\Rattus_norvegicus-Rnor_6.0-dbSNP149\Rattus_norvegicus-Rnor_6.0-dbSNP149.genometemplate\sequences\NC_005100_chr1.gbk#0	282763074	NC_005100.4	-	932	70235091..70234160	619476, 1563921		Apeg3
Nat14	0.035	0.156	0.001	0.601	4.44378	0.258692	0.00157206	0.0582145	Z-000860	Nat14	gene		D:\assemblies\Rattus_norvegicus-Rnor_6.0-dbSNP149\Rattus_norvegicus-Rnor_6.0-dbSNP149.genometemplate\sequences\NC_005100_chr1.gbk#0	282763074	NC_005100.4	-	2897	72465299..72462403	361500, 1565991		Nat14	RGD1565991, Zfp628
Rpl28	523.685	1253.32	5545.75	649.889	2.39326	1.92851	8.53338	0.805808	Z-000868	Rpl28	gene		D:\assemblies\Rattus_norvegicus-Rnor_6.0-dbSNP149\Rattus_norvegicus-Rnor_6.0-dbSNP149.genometemplate\sequences\NC_005100_chr1.gbk#0	282763074	NC_005100.4	-	2660	72621941..72619282	64638, 621193		Rpl28
Ptprh	1.254	1.03	0.001	1.194	0.821445	0.862804	0.000791602	1.05035	Z-000882	Ptprh	gene		D:\assemblies\Rattus_norvegicus-Rnor_6.0-dbSNP149\Rattus_norvegicus-Rnor_6.0-dbSNP149.genometemplate\sequences\NC_005100_chr1.gbk#0	282763074	NC_005100.4	+	49227	72809935..72859161	171125, 620553		Ptprh	Bem2
Lilrb4	0.889	0.141	14.19	0.634	0.159207	0.223215	22.3889	1.40204	Z-000896	Lilrb4	gene		D:\assemblies\Rattus_norvegicus-Rnor_6.0-dbSNP149\Rattus_norvegicus-Rnor_6.0-dbSNP149.genometemplate\sequences\NC_005100_chr1.gbk#0	282763074	NC_005100.4	-	5595	73399448..73393854	292594, 1359090		Lilrb4	Gp49b, GP49B2
LOC103690015	33.603	149.021	2602.14	42.473	4.43482	3.50863	61.266	0.791155	Z-000940	LOC103690015	gene		D:\assemblies\Rattus_norvegicus-Rnor_6.0-dbSNP149\Rattus_norvegicus-Rnor_6.0-dbSNP149.genometemplate\sequences\NC_005100_chr1.gbk#0	282763074	NC_005100.4	+	484	77541352..77541835	103690015, 9313957		LOC103690015
Zfp541	0.001	0.004	0.049	0.001	4.04501	4.04501	51.6644	1	Z-000950	Zfp541	gene		D:\assemblies\Rattus_norvegicus-Rnor_6.0-dbSNP149\Rattus_norvegicus-Rnor_6.0-dbSNP149.genometemplate\sequences\NC_005100_chr1.gbk#0	282763074	NC_005100.4	+	36629	77957188..77993816	308108, 1310756		Zfp541
Clasrp	2.462	3.608	75.303	3.142	1.46571	1.14846	23.969	0.783551	Z-001042	Clasrp	gene		D:\assemblies\Rattus_norvegicus-Rnor_6.0-dbSNP149\Rattus_norvegicus-Rnor_6.0-dbSNP149.genometemplate\sequences\NC_005100_chr1.gbk#0	282763074	NC_005100.4	-	24242	80515761..80491520	499390, 1563538		Clasrp	Sfrs16, Srsf16
Apoc1	0.012	0.125	1.694	0.001	10.674	132.127	1792.22	12.3784	Z-001049	Apoc1	gene		D:\assemblies\Rattus_norvegicus-Rnor_6.0-dbSNP149\Rattus_norvegicus-Rnor_6.0-dbSNP149.genometemplate\sequences\NC_005100_chr1.gbk#0	282763074	NC_005100.4	-	3321	80609954..80606634	108348160		Apoc1
Cblc	0.001	0.001	0.112	0.001	1	1	117.998	1	Z-001054	Cblc	gene		D:\assemblies\Rattus_norvegicus-Rnor_6.0-dbSNP149\Rattus_norvegicus-Rnor_6.0-dbSNP149.genometemplate\sequences\NC_005100_chr1.gbk#0	282763074	NC_005100.4	-	16826	80716146..80699321	292699, 1307651		Cblc
LOC108349553	0.001	0.001	0.491	0.001	1	1	519.743	1	Z-001060	LOC108349553	gene		D:\assemblies\Rattus_norvegicus-Rnor_6.0-dbSNP149\Rattus_norvegicus-Rnor_6.0-dbSNP149.genometemplate\sequences\NC_005100_chr1.gbk#0	282763074	NC_005100.4	+	2021	80851216..80853236	108349553		LOC108349553
Cadm4	0.007	0.007	0.001	0.183	1.08806	0.0396686	0.00516927	0.0364581	Z-001081	Cadm4	gene		D:\assemblies\Rattus_norvegicus-Rnor_6.0-dbSNP149\Rattus_norvegicus-Rnor_6.0-dbSNP149.genometemplate\sequences\NC_005100_chr1.gbk#0	282763074	NC_005100.4	+	4642	81365200..81369841	365216, 1304722		Cadm4	Igsf4c, Necl-4, Upar
LOC100910611	0.001	0.001	0.03	0.001	1	1	31.8717	1	Z-001095	LOC100910611	gene		D:\assemblies\Rattus_norvegicus-Rnor_6.0-dbSNP149\Rattus_norvegicus-Rnor_6.0-dbSNP149.genometemplate\sequences\NC_005100_chr1.gbk#0	282763074	NC_005100.4	+	19859	81564683..81584541	100910611, 6497684		LOC100910611
Cd79a	10.308	9.85	225.09	6.454	0.955581	1.52613	34.8755	1.59707	Z-001106	Cd79a	gene		D:\assemblies\Rattus_norvegicus-Rnor_6.0-dbSNP149\Rattus_norvegicus-Rnor_6.0-dbSNP149.genometemplate\sequences\NC_005100_chr1.gbk#0	282763074	NC_005100.4	+	4431	81763609..81768039	100913063, 6484896		Cd79a
LOC100359930	0.001	0.001	0.558	0.001	1	1	590.262	1	Z-001142	LOC100359930	gene		D:\assemblies\Rattus_norvegicus-Rnor_6.0-dbSNP149\Rattus_norvegicus-Rnor_6.0-dbSNP149.genometemplate\sequences\NC_005100_chr1.gbk#0	282763074	NC_005100.4	-	1646	82653657..82652012	100359930, 2323115		LOC100359930
LOC100910953	0.001	0.001	0.184	0.001	1	1	194.374	1	Z-001143	LOC100910953	gene		D:\assemblies\Rattus_norvegicus-Rnor_6.0-dbSNP149\Rattus_norvegicus-Rnor_6.0-dbSNP149.genometemplate\sequences\NC_005100_chr1.gbk#0	282763074	NC_005100.4	+	4779	82815709..82820487	100910953, 6495491		LOC100910953
LOC681077	0.001	0.001	0.372	0.001	1	1	393.784	1	Z-001146	LOC681077	gene		D:\assemblies\Rattus_norvegicus-Rnor_6.0-dbSNP149\Rattus_norvegicus-Rnor_6.0-dbSNP149.genometemplate\sequences\NC_005100_chr1.gbk#0	282763074	NC_005100.4	+	15209	82922429..82937637	681077, 1584667		LOC681077
Mia	0.093	0.001	10.582	0.001	0.0101575	1	11196.7	98.449	Z-001169	Mia	gene		D:\assemblies\Rattus_norvegicus-Rnor_6.0-dbSNP149\Rattus_norvegicus-Rnor_6.0-dbSNP149.genometemplate\sequences\NC_005100_chr1.gbk#0	282763074	NC_005100.4	-	1694	83993270..83991577	81510, 620883		Mia	Cdrap, Mia1
Acp7	0.001	0.001	0.157	0.001	1	1	165.631	1	Z-001207	Acp7	gene		D:\assemblies\Rattus_norvegicus-Rnor_6.0-dbSNP149\Rattus_norvegicus-Rnor_6.0-dbSNP149.genometemplate\sequences\NC_005100_chr1.gbk#0	282763074	NC_005100.4	+	21067	85141383..85162449	687403, 1585399		Acp7
Dll3	0.001	0.071	0.001	0.182	75.2266	0.390709	0.00519375	0.00519375	Z-001228	Dll3	gene		D:\assemblies\Rattus_norvegicus-Rnor_6.0-dbSNP149\Rattus_norvegicus-Rnor_6.0-dbSNP149.genometemplate\sequences\NC_005100_chr1.gbk#0	282763074	NC_005100.4	+	7809	85485875..85493683	114125, 70953		Dll3
LOC102550585	0.016	0.004	0.045	0.001	0.27339	4.62582	47.236	16.9202	Z-001262	LOC102550585	gene		D:\assemblies\Rattus_norvegicus-Rnor_6.0-dbSNP149\Rattus_norvegicus-Rnor_6.0-dbSNP149.genometemplate\sequences\NC_005100_chr1.gbk#0	282763074	NC_005100.4	-	11809	87160644..87148836	102550585, 7706385		LOC102550585
LOC108349558	0.041	0.716	0.495	0.001	17.4331	757.356	523.545	43.4436	Z-001309	LOC108349558	gene		D:\assemblies\Rattus_norvegicus-Rnor_6.0-dbSNP149\Rattus_norvegicus-Rnor_6.0-dbSNP149.genometemplate\sequences\NC_005100_chr1.gbk#0	282763074	NC_005100.4	+	4305	88631683..88635987	108349558		LOC108349558
LOC100912425	0.005	0.001	0.553	0.001	0.208407	1	585.009	4.7983	Z-001313	LOC100912425	gene		D:\assemblies\Rattus_norvegicus-Rnor_6.0-dbSNP149\Rattus_norvegicus-Rnor_6.0-dbSNP149.genometemplate\sequences\NC_005100_chr1.gbk#0	282763074	NC_005100.4	-	3848	88692125..88688278	100912425, 6486906		LOC100912425
Nphs1	0.001	0.001	2.04	0.001	1	1	2158.32	1	Z-001328	Nphs1	gene		D:\assemblies\Rattus_norvegicus-Rnor_6.0-dbSNP149\Rattus_norvegicus-Rnor_6.0-dbSNP149.genometemplate\sequences\NC_005100_chr1.gbk#0	282763074	NC_005100.4	+	28215	88922346..88950560	64563, 620460		Nphs1
Upk1a	0.001	0.059	0.207	0.001	62.1617	62.1617	219.482	1	Z-001341	Upk1a	gene		D:\assemblies\Rattus_norvegicus-Rnor_6.0-dbSNP149\Rattus_norvegicus-Rnor_6.0-dbSNP149.genometemplate\sequences\NC_005100_chr1.gbk#0	282763074	NC_005100.4	-	10999	89071579..89060581	365227, 1309849		Upk1a
Hamp	0.001	0.001	5.673	0.001	1	1	6002.37	1	Z-001363	Hamp	gene		D:\assemblies\Rattus_norvegicus-Rnor_6.0-dbSNP149\Rattus_norvegicus-Rnor_6.0-dbSNP149.genometemplate\sequences\NC_005100_chr1.gbk#0	282763074	NC_005100.4	-	1940	89369960..89368021	84604, 70971		Hamp	Hepc
Fam187b	0.001	0.034	0.079	0.001	36.4262	36.4262	83.1876	1	Z-001367	Fam187b	gene		D:\assemblies\Rattus_norvegicus-Rnor_6.0-dbSNP149\Rattus_norvegicus-Rnor_6.0-dbSNP149.genometemplate\sequences\NC_005100_chr1.gbk#0	282763074	NC_005100.4	+	7912	89408718..89416629	689048, 1597448		Fam187b
Fxyd7	0.001	0.001	0.785	0.001	1	1	830.457	1	Z-001369	Fxyd7	gene		D:\assemblies\Rattus_norvegicus-Rnor_6.0-dbSNP149\Rattus_norvegicus-Rnor_6.0-dbSNP149.genometemplate\sequences\NC_005100_chr1.gbk#0	282763074	NC_005100.4	-	9469	89484069..89474601	63848, 620830		Fxyd7
LOC108349466	0.154	0.755	0.001	0.145	4.91113	5.21815	0.00653237	1.06251	Z-001396	LOC108349466	gene		D:\assemblies\Rattus_norvegicus-Rnor_6.0-dbSNP149\Rattus_norvegicus-Rnor_6.0-dbSNP149.genometemplate\sequences\NC_005100_chr1.gbk#0	282763074	NC_005100.4	+	2940	90572864..90575803	108349466		LOC108349466
Ovol3	0.005	0.001	0.553	0.001	0.208407	1	585.009	4.7983	Z-001404	Ovol3	gene		D:\assemblies\Rattus_norvegicus-Rnor_6.0-dbSNP149\Rattus_norvegicus-Rnor_6.0-dbSNP149.genometemplate\sequences\NC_005100_chr1.gbk#0	282763074	NC_005100.4	+	3637	91037531..91041167	365226, 1583800		Ovol3
Cebpa	19.864	31.775	1.95	26.148	1.59965	1.2152	0.0745885	0.759664	Z-001417	Cebpa	gene		D:\assemblies\Rattus_norvegicus-Rnor_6.0-dbSNP149\Rattus_norvegicus-Rnor_6.0-dbSNP149.genometemplate\sequences\NC_005100_chr1.gbk#0	282763074	NC_005100.4	+	2673	91363492..91366164	24252, 2326		Cebpa	DBPCEP
Siglec10	1.978	1.735	14.99	1.285	0.877084	1.34956	11.6623	1.53869	Z-001497	Siglec10	gene		D:\assemblies\Rattus_norvegicus-Rnor_6.0-dbSNP149\Rattus_norvegicus-Rnor_6.0-dbSNP149.genometemplate\sequences\NC_005100_chr1.gbk#0	282763074	NC_005100.4	-	9074	98521736..98512663	292844, 1307441		Siglec10	Siglecg
Klk1b3	0.001	0.008	0.301	0.001	8.42407	8.42407	318.613	1	Z-001548	Klk1b3	gene		D:\assemblies\Rattus_norvegicus-Rnor_6.0-dbSNP149\Rattus_norvegicus-Rnor_6.0-dbSNP149.genometemplate\sequences\NC_005100_chr1.gbk#0	282763074	NC_005100.4	+	4204	100199057..100203260	24594, 3175		Klk1b3	Klk1, Klk1c1, Ngfg, rGK-1, rK-1
Acpt	0.082	0.081	8.264	0.569	0.981553	0.141542	14.512	0.144202	Z-001552	Acpt	gene		D:\assemblies\Rattus_norvegicus-Rnor_6.0-dbSNP149\Rattus_norvegicus-Rnor_6.0-dbSNP149.genometemplate\sequences\NC_005100_chr1.gbk#0	282763074	NC_005100.4	-	8226	100234536..100226311	308569, 1308270		Acpt
Irf3	5.641	14.224	209.715	7.327	2.52139	1.94137	28.6227	0.769959	Z-001591	Irf3	gene		D:\assemblies\Rattus_norvegicus-Rnor_6.0-dbSNP149\Rattus_norvegicus-Rnor_6.0-dbSNP149.genometemplate\sequences\NC_005100_chr1.gbk#0	282763074	NC_005100.4	+	4959	100992244..100997202	292892, 1549774		Irf3
Nosip	7.537	17.254	160.236	8.946	2.28942	1.92874	17.9117	0.842459	Z-001596	Nosip	gene		D:\assemblies\Rattus_norvegicus-Rnor_6.0-dbSNP149\Rattus_norvegicus-Rnor_6.0-dbSNP149.genometemplate\sequences\NC_005100_chr1.gbk#0	282763074	NC_005100.4	+	17368	101055571..101072938	292894, 1309992		Nosip
Snrnp70	18.224	35.14	458.303	20.573	1.92826	1.70806	22.2766	0.885802	Z-001620	Snrnp70	gene		D:\assemblies\Rattus_norvegicus-Rnor_6.0-dbSNP149\Rattus_norvegicus-Rnor_6.0-dbSNP149.genometemplate\sequences\NC_005100_chr1.gbk#0	282763074	NC_005100.4	-	20684	101388153..101367470	361574, 1307120		Snrnp70	Snrp70
Car11	0.145	0.156	5.47	0.273	1.07744	0.573538	20.0563	0.532313	Z-001645	Car11	gene		D:\assemblies\Rattus_norvegicus-Rnor_6.0-dbSNP149\Rattus_norvegicus-Rnor_6.0-dbSNP149.genometemplate\sequences\NC_005100_chr1.gbk#0	282763074	NC_005100.4	+	5350	101682009..101687358	308588, 735155		Car11	CAR-XI
Abcc6	0.009	0.004	0.025	0.001	0.431336	3.95545	26.5849	9.17022	Z-001662	Abcc6	gene		D:\assemblies\Rattus_norvegicus-Rnor_6.0-dbSNP149\Rattus_norvegicus-Rnor_6.0-dbSNP149.genometemplate\sequences\NC_005100_chr1.gbk#0	282763074	NC_005100.4	-	58467	102013252..101954786	81642, 620268		Abcc6	Mrp6
LOC108349574	0.001	0.001	0.115	0.001	1	1	122.045	1	Z-001694	LOC108349574	gene		D:\assemblies\Rattus_norvegicus-Rnor_6.0-dbSNP149\Rattus_norvegicus-Rnor_6.0-dbSNP149.genometemplate\sequences\NC_005100_chr1.gbk#0	282763074	NC_005100.4	+	1324	103369786..103371109	108349574		LOC108349574
Mrgprb3	0.007	0.001	0.001	0.246	0.126945	0.00384318	0.00384318	0.0302743	Z-001704	Mrgprb3	gene		D:\assemblies\Rattus_norvegicus-Rnor_6.0-dbSNP149\Rattus_norvegicus-Rnor_6.0-dbSNP149.genometemplate\sequences\NC_005100_chr1.gbk#0	282763074	NC_005100.4	-	12908	103909958..103897051	691194, 1587398		Mrgprb3
Siglech	0.001	0.001	0.322	0.001	1	1	340.305	1	Z-001745	Siglech	gene		D:\assemblies\Rattus_norvegicus-Rnor_6.0-dbSNP149\Rattus_norvegicus-Rnor_6.0-dbSNP149.genometemplate\sequences\NC_005100_chr1.gbk#0	282763074	NC_005100.4	+	106409	114046308..114152716	361584, 1310401		Siglech
LOC108348211	0.497	0.001	1.427	0.001	0.0019034	1	1509.48	525.377	Z-001795	LOC108348211	gene		D:\assemblies\Rattus_norvegicus-Rnor_6.0-dbSNP149\Rattus_norvegicus-Rnor_6.0-dbSNP149.genometemplate\sequences\NC_005100_chr1.gbk#0	282763074	NC_005100.4	-	537	118893309..118892773	108348211		LOC108348211
Ndn	0.064	0.012	0.001	0.261	0.19391	0.0475182	0.00362802	0.245053	Z-001818	Ndn	gene		D:\assemblies\Rattus_norvegicus-Rnor_6.0-dbSNP149\Rattus_norvegicus-Rnor_6.0-dbSNP149.genometemplate\sequences\NC_005100_chr1.gbk#0	282763074	NC_005100.4	+	1600	122981755..122983354	308690, 1310526		Ndn
LOC108349585	0.001	0.006	1.679	0.001	5.91858	5.91858	1776.83	1	Z-001831	LOC108349585	gene		D:\assemblies\Rattus_norvegicus-Rnor_6.0-dbSNP149\Rattus_norvegicus-Rnor_6.0-dbSNP149.genometemplate\sequences\NC_005100_chr1.gbk#0	282763074	NC_005100.4	+	7462	124828939..124836400	108349585		LOC108349585
LOC108349234	0.001	0.005	0.069	0.001	5.25642	5.25642	73.0906	1	Z-001874	LOC108349234	gene		D:\assemblies\Rattus_norvegicus-Rnor_6.0-dbSNP149\Rattus_norvegicus-Rnor_6.0-dbSNP149.genometemplate\sequences\NC_005100_chr1.gbk#0	282763074	NC_005100.4	-	20781	128630905..128610125	108349234		LOC108349234
LOC102553173	0.071	0.161	1.045	0.117	2.25894	1.37505	8.91315	0.608714	Z-001884	LOC102553173	gene		D:\assemblies\Rattus_norvegicus-Rnor_6.0-dbSNP149\Rattus_norvegicus-Rnor_6.0-dbSNP149.genometemplate\sequences\NC_005100_chr1.gbk#0	282763074	NC_005100.4	-	50470	131432779..131382310	102553173, 7683637		LOC102553173
LOC102554078	0.006	0.045	0.001	0.046	7.80911	0.988982	0.0207145	0.126645	Z-001896	LOC102554078	gene		D:\assemblies\Rattus_norvegicus-Rnor_6.0-dbSNP149\Rattus_norvegicus-Rnor_6.0-dbSNP149.genometemplate\sequences\NC_005100_chr1.gbk#0	282763074	NC_005100.4	-	3216	134427851..134424636	102554078, 7634877		LOC102554078
LOC108349594	16.482	30.764	213.398	20.192	1.86651	1.52357	10.5685	0.816265	Z-001899	LOC108349594	gene		D:\assemblies\Rattus_norvegicus-Rnor_6.0-dbSNP149\Rattus_norvegicus-Rnor_6.0-dbSNP149.genometemplate\sequences\NC_005100_chr1.gbk#0	282763074	NC_005100.4	-	14710	134888108..134873399	108349594		LOC108349594
LOC108348469	0.001	0.001	0.015	0.001	1	1	15.5537	1	Z-001908	LOC108348469	gene		D:\assemblies\Rattus_norvegicus-Rnor_6.0-dbSNP149\Rattus_norvegicus-Rnor_6.0-dbSNP149.genometemplate\sequences\NC_005100_chr1.gbk#0	282763074	NC_005100.4	-	9055	135973052..135963998	108348469		LOC108348469
Hapln3	0.028	0.046	2.33	0.001	1.63663	48.4878	2464.92	29.6267	Z-001934	Hapln3	gene		D:\assemblies\Rattus_norvegicus-Rnor_6.0-dbSNP149\Rattus_norvegicus-Rnor_6.0-dbSNP149.genometemplate\sequences\NC_005100_chr1.gbk#0	282763074	NC_005100.4	-	18108	140845386..140827279	308773, 1308098		Hapln3
LOC103691170	20.454	59.839	242.286	26.117	2.92546	2.29114	9.2768	0.783171	Z-001936	LOC103691170	gene		D:\assemblies\Rattus_norvegicus-Rnor_6.0-dbSNP149\Rattus_norvegicus-Rnor_6.0-dbSNP149.genometemplate\sequences\NC_005100_chr1.gbk#0	282763074	NC_005100.4	+	6997	140891600..140898596	103691170, 9269367		LOC103691170
LOC103691181	0.001	0.001	0.082	0.001	1	1	86.9615	1	Z-002030	LOC103691181	gene		D:\assemblies\Rattus_norvegicus-Rnor_6.0-dbSNP149\Rattus_norvegicus-Rnor_6.0-dbSNP149.genometemplate\sequences\NC_005100_chr1.gbk#0	282763074	NC_005100.4	+	15968	145505886..145521853	103691181, 9335574		LOC103691181
Cfap161	0.001	0.001	1.345	0.001	1	1	1423.06	1	Z-002035	Cfap161	gene		D:\assemblies\Rattus_norvegicus-Rnor_6.0-dbSNP149\Rattus_norvegicus-Rnor_6.0-dbSNP149.genometemplate\sequences\NC_005100_chr1.gbk#0	282763074	NC_005100.4	-	24491	145931583..145907093	308794, 1310371		Cfap161	RGD1310371
LOC108349171	0.001	0.003	0.027	0.001	3.55933	3.55933	29.0141	1	Z-002040	LOC108349171	gene		D:\assemblies\Rattus_norvegicus-Rnor_6.0-dbSNP149\Rattus_norvegicus-Rnor_6.0-dbSNP149.genometemplate\sequences\NC_005100_chr1.gbk#0	282763074	NC_005100.4	+	30567	146289823..146320389	108349171		LOC108349171
LOC102554680	0.003	0.001	0.058	0.001	0.290657	1	61.3677	3.44048	Z-002096	LOC102554680	gene		D:\assemblies\Rattus_norvegicus-Rnor_6.0-dbSNP149\Rattus_norvegicus-Rnor_6.0-dbSNP149.genometemplate\sequences\NC_005100_chr1.gbk#0	282763074	NC_005100.4	-	7410	151916003..151908594	102554680, 7641285		LOC102554680
LOC108349194	0.004	0.004	0.04	0.001	1.09584	4.44759	42.2902	4.05863	Z-002139	LOC108349194	gene		D:\assemblies\Rattus_norvegicus-Rnor_6.0-dbSNP149\Rattus_norvegicus-Rnor_6.0-dbSNP149.genometemplate\sequences\NC_005100_chr1.gbk#0	282763074	NC_005100.4	-	13681	162004480..161990800	108349194		LOC108349194
LOC108349448	0.001	0.001	1.564	0.001	1	1	1654.91	1	Z-002163	LOC108349448	gene		D:\assemblies\Rattus_norvegicus-Rnor_6.0-dbSNP149\Rattus_norvegicus-Rnor_6.0-dbSNP149.genometemplate\sequences\NC_005100_chr1.gbk#0	282763074	NC_005100.4	-	10596	163344964..163334369	108349448		LOC108349448
Gucy2d	0.001	0.003	0.061	0.001	3.37799	3.37799	64.7055	1	Z-002164	Gucy2d	gene		D:\assemblies\Rattus_norvegicus-Rnor_6.0-dbSNP149\Rattus_norvegicus-Rnor_6.0-dbSNP149.genometemplate\sequences\NC_005100_chr1.gbk#0	282763074	NC_005100.4	+	34704	163398891..163433594	113911, 69322		Gucy2d
Olr35	0.009	0.001	0.207	0.001	0.110654	1	219.349	9.03719	Z-002209	Olr35	gene		D:\assemblies\Rattus_norvegicus-Rnor_6.0-dbSNP149\Rattus_norvegicus-Rnor_6.0-dbSNP149.genometemplate\sequences\NC_005100_chr1.gbk#0	282763074	NC_005100.4	+	920	164706276..164707195	293140, 1333428		Olr35
LOC103691200	0.001	0.005	0.293	0.001	5.22778	5.22778	310.25	1	Z-002230	LOC103691200	gene		D:\assemblies\Rattus_norvegicus-Rnor_6.0-dbSNP149\Rattus_norvegicus-Rnor_6.0-dbSNP149.genometemplate\sequences\NC_005100_chr1.gbk#0	282763074	NC_005100.4	+	16912	165520122..165537033	103691200, 9145766		LOC103691200
Art2b	0.064	0.006	63.433	0.228	0.0959707	0.0271563	278.689	0.282965	Z-002252	Art2b	gene		D:\assemblies\Rattus_norvegicus-Rnor_6.0-dbSNP149\Rattus_norvegicus-Rnor_6.0-dbSNP149.genometemplate\sequences\NC_005100_chr1.gbk#0	282763074	NC_005100.4	-	20069	166685097..166665029	293152, 3521		Art2b	Ag-F, Art2, Art2a, ARTC2, Ly-2, LY2, PtaA, Rt6, RT6.1, RT6.2
Hbb-b1	1104.45	2957.13	2.099	1366.76	2.67745	2.1636	0.00153575	0.808083	Z-002361	Hbb-b1	gene		D:\assemblies\Rattus_norvegicus-Rnor_6.0-dbSNP149\Rattus_norvegicus-Rnor_6.0-dbSNP149.genometemplate\sequences\NC_005100_chr1.gbk#0	282763074	NC_005100.4	+	7493	168945531..168953023	361619, 1595848		Hbb-b1
LOC100134871	4577.85	14518.1	10.154	5682.76	3.17138	2.55476	0.00178679	0.805568	Z-002362	LOC100134871	gene		D:\assemblies\Rattus_norvegicus-Rnor_6.0-dbSNP149\Rattus_norvegicus-Rnor_6.0-dbSNP149.genometemplate\sequences\NC_005100_chr1.gbk#0	282763074	NC_005100.4	+	1377	168957460..168958836	100134871, 2290038		LOC100134871
Hbb	6157.83	20051.2	7.633	7574.3	3.25622	2.64727	0.00100775	0.812989	Z-002364	Hbb	gene		D:\assemblies\Rattus_norvegicus-Rnor_6.0-dbSNP149\Rattus_norvegicus-Rnor_6.0-dbSNP149.genometemplate\sequences\NC_005100_chr1.gbk#0	282763074	NC_005100.4	-	1412	168972680..168971269	24440, 2783		Hbb
LOC102555557	0.002	0.278	0.275	0.001	140.53	294.454	290.48	2.09531	Z-002377	LOC102555557	gene		D:\assemblies\Rattus_norvegicus-Rnor_6.0-dbSNP149\Rattus_norvegicus-Rnor_6.0-dbSNP149.genometemplate\sequences\NC_005100_chr1.gbk#0	282763074	NC_005100.4	-	9265	169181469..169172205	102555557, 7646482		LOC102555557
Olr219	0.001	0.001	0.143	0.001	1	1	151.43	1	Z-002464	Olr219	gene		D:\assemblies\Rattus_norvegicus-Rnor_6.0-dbSNP149\Rattus_norvegicus-Rnor_6.0-dbSNP149.genometemplate\sequences\NC_005100_chr1.gbk#0	282763074	NC_005100.4	-	924	170933660..170932737	293365, 1334028		Olr219
Olfml1	0.008	0.005	0.487	0.001	0.593767	5.08558	514.775	8.56494	Z-002482	Olfml1	gene		D:\assemblies\Rattus_norvegicus-Rnor_6.0-dbSNP149\Rattus_norvegicus-Rnor_6.0-dbSNP149.genometemplate\sequences\NC_005100_chr1.gbk#0	282763074	NC_005100.4	+	24293	171793782..171818074	361621, 1311854		Olfml1
Rpl27a	688.683	1594.35	8983.5	815.031	2.31507	1.95618	11.0223	0.844977	Z-002539	Rpl27a	gene		D:\assemblies\Rattus_norvegicus-Rnor_6.0-dbSNP149\Rattus_norvegicus-Rnor_6.0-dbSNP149.genometemplate\sequences\NC_005100_chr1.gbk#0	282763074	NC_005100.4	+	3019	174132798..174135816	293418, 1309771		Rpl27a
LOC103691206	0.038	0.001	0.362	0.001	0.0251315	1	382.753	39.7907	Z-002564	LOC103691206	gene		D:\assemblies\Rattus_norvegicus-Rnor_6.0-dbSNP149\Rattus_norvegicus-Rnor_6.0-dbSNP149.genometemplate\sequences\NC_005100_chr1.gbk#0	282763074	NC_005100.4	+	1980	175871531..175873510	103691206, 9163275		LOC103691206
Calcb	0.001	0.001	0.673	0.001	1	1	711.919	1	Z-002615	Calcb	gene		D:\assemblies\Rattus_norvegicus-Rnor_6.0-dbSNP149\Rattus_norvegicus-Rnor_6.0-dbSNP149.genometemplate\sequences\NC_005100_chr1.gbk#0	282763074	NC_005100.4	+	5365	184271116..184276480	171519, 620997		Calcb
Sox6	1.317	1.211	0.001	1.545	0.919807	0.783827	0.000611661	0.852165	Z-002627	Sox6	gene		D:\assemblies\Rattus_norvegicus-Rnor_6.0-dbSNP149\Rattus_norvegicus-Rnor_6.0-dbSNP149.genometemplate\sequences\NC_005100_chr1.gbk#0	282763074	NC_005100.4	+	554491	185631702..186186192	293165, 1309000		Sox6
Crym	41.013	111.436	1.191	63.769	2.71709	1.7475	0.0186803	0.643153	Z-002674	Crym	gene		D:\assemblies\Rattus_norvegicus-Rnor_6.0-dbSNP149\Rattus_norvegicus-Rnor_6.0-dbSNP149.genometemplate\sequences\NC_005100_chr1.gbk#0	282763074	NC_005100.4	-	15175	189960069..189944895	117024, 620943		Crym	CDK108
Cdr2	13.676	23.079	0.622	15.309	1.68753	1.50757	0.0406484	0.893358	Z-002701	Cdr2	gene		D:\assemblies\Rattus_norvegicus-Rnor_6.0-dbSNP149\Rattus_norvegicus-Rnor_6.0-dbSNP149.genometemplate\sequences\NC_005100_chr1.gbk#0	282763074	NC_005100.4	-	24909	190914606..190889698	308958, 1310578		Cdr2	RGD1310578
LOC108349633	0.131	0.784	0.347	0.001	5.97224	830.033	367.358	138.982	Z-002741	LOC108349633	gene		D:\assemblies\Rattus_norvegicus-Rnor_6.0-dbSNP149\Rattus_norvegicus-Rnor_6.0-dbSNP149.genometemplate\sequences\NC_005100_chr1.gbk#0	282763074	NC_005100.4	-	8689	194855543..194846855	108349633		LOC108349633
LOC103691231	0.006	0.008	0.211	0.001	1.25131	8.16737	223.627	6.52706	Z-002742	LOC103691231	gene		D:\assemblies\Rattus_norvegicus-Rnor_6.0-dbSNP149\Rattus_norvegicus-Rnor_6.0-dbSNP149.genometemplate\sequences\NC_005100_chr1.gbk#0	282763074	NC_005100.4	-	73171	194929649..194856479	103691231, 9199564		LOC103691231
Il21r	0.872	0.125	78.977	1.06	0.143827	0.118265	74.5078	0.822267	Z-002765	Il21r	gene		D:\assemblies\Rattus_norvegicus-Rnor_6.0-dbSNP149\Rattus_norvegicus-Rnor_6.0-dbSNP149.genometemplate\sequences\NC_005100_chr1.gbk#0	282763074	NC_005100.4	+	27781	196996405..197024185	308977, 1304950		Il21r
Cd19	0.33	0.043	42.944	0.395	0.129171	0.107788	108.747	0.834457	Z-002778	Cd19	gene		D:\assemblies\Rattus_norvegicus-Rnor_6.0-dbSNP149\Rattus_norvegicus-Rnor_6.0-dbSNP149.genometemplate\sequences\NC_005100_chr1.gbk#0	282763074	NC_005100.4	-	6702	197822123..197815422	365367, 1309086		Cd19
Coro1a	60.718	159.178	721.023	69.011	2.62162	2.30658	10.448	0.87983	Z-002794	Coro1a	gene		D:\assemblies\Rattus_norvegicus-Rnor_6.0-dbSNP149\Rattus_norvegicus-Rnor_6.0-dbSNP149.genometemplate\sequences\NC_005100_chr1.gbk#0	282763074	NC_005100.4	-	5008	198128890..198123883	155151, 620009		Coro1a
LOC108349642	0.033	1.349	12.759	0.222	40.5816	6.07107	57.4009	0.149602	Z-002795	LOC108349642	gene		D:\assemblies\Rattus_norvegicus-Rnor_6.0-dbSNP149\Rattus_norvegicus-Rnor_6.0-dbSNP149.genometemplate\sequences\NC_005100_chr1.gbk#0	282763074	NC_005100.4	-	3482	198143874..198140393	108349642		LOC108349642
Fam57b	1.529	4.855	0.001	2.368	3.17572	2.05032	0.000399171	0.645625	Z-002804	Fam57b	gene		D:\assemblies\Rattus_norvegicus-Rnor_6.0-dbSNP149\Rattus_norvegicus-Rnor_6.0-dbSNP149.genometemplate\sequences\NC_005100_chr1.gbk#0	282763074	NC_005100.4	+	13633	198252208..198265840	293493, 1308215		Fam57b	RGD1308215
Sez6l2	0.001	0.006	0.063	0.001	6.55595	6.55595	66.6138	1	Z-002813	Sez6l2	gene		D:\assemblies\Rattus_norvegicus-Rnor_6.0-dbSNP149\Rattus_norvegicus-Rnor_6.0-dbSNP149.genometemplate\sequences\NC_005100_chr1.gbk#0	282763074	NC_005100.4	+	20344	198383201..198403544	308988, 1565281		Sez6l2	RGD1565281
LOC102552638	0.007	0.001	0.198	0.001	0.141672	1	209.728	7.05854	Z-002814	LOC102552638	gene		D:\assemblies\Rattus_norvegicus-Rnor_6.0-dbSNP149\Rattus_norvegicus-Rnor_6.0-dbSNP149.genometemplate\sequences\NC_005100_chr1.gbk#0	282763074	NC_005100.4	-	3642	198409111..198405470	102552638, 7676737		LOC102552638
LOC108349645	0.001	0.001	0.647	0.001	1	1	684.706	1	Z-002824	LOC108349645	gene		D:\assemblies\Rattus_norvegicus-Rnor_6.0-dbSNP149\Rattus_norvegicus-Rnor_6.0-dbSNP149.genometemplate\sequences\NC_005100_chr1.gbk#0	282763074	NC_005100.4	+	1246	198489383..198490628	108349645		LOC108349645
2018-09-01	6.751	12.156	134.136	5.307	1.80061	2.29057	25.2759	1.27211	Z-002832	2018-09-01	gene		D:\assemblies\Rattus_norvegicus-Rnor_6.0-dbSNP149\Rattus_norvegicus-Rnor_6.0-dbSNP149.genometemplate\sequences\NC_005100_chr1.gbk#0	282763074	NC_005100.4	-	3867	198662610..198658744	293507, 1307216		2018-09-01
Ahsp	450.867	1319.46	0.001	601.799	2.92648	2.19252	1.57051e-06	0.749199	Z-002888	Ahsp	gene		D:\assemblies\Rattus_norvegicus-Rnor_6.0-dbSNP149\Rattus_norvegicus-Rnor_6.0-dbSNP149.genometemplate\sequences\NC_005100_chr1.gbk#0	282763074	NC_005100.4	+	973	199720038..199721010	293522, 1306725		Ahsp	Eraf
RGD1560958	0.001	0.001	1.001	0.001	1	1	1059.39	1	Z-002918	RGD1560958	gene		D:\assemblies\Rattus_norvegicus-Rnor_6.0-dbSNP149\Rattus_norvegicus-Rnor_6.0-dbSNP149.genometemplate\sequences\NC_005100_chr1.gbk#0	282763074	NC_005100.4	-	9102	201914067..201904966	499277, 1560958		RGD1560958
Pstk	1.591	3.683	44.41	1.123	2.31519	3.27799	39.5312	1.41586	Z-002921	Pstk	gene		D:\assemblies\Rattus_norvegicus-Rnor_6.0-dbSNP149\Rattus_norvegicus-Rnor_6.0-dbSNP149.genometemplate\sequences\NC_005100_chr1.gbk#0	282763074	NC_005100.4	+	10416	201950148..201960563	361661, 1564300		Pstk	RGD1564300
Acadsb	1.717	2.34	0.265	2.544	1.36318	0.919729	0.104032	0.674693	Z-002923	Acadsb	gene		D:\assemblies\Rattus_norvegicus-Rnor_6.0-dbSNP149\Rattus_norvegicus-Rnor_6.0-dbSNP149.genometemplate\sequences\NC_005100_chr1.gbk#0	282763074	NC_005100.4	+	41410	201981362..202022771	25618, 2013		Acadsb
Foxi2	0.87	0.677	0.001	1.37	0.777971	0.494421	0.000690024	0.635526	Z-002979	Foxi2	gene		D:\assemblies\Rattus_norvegicus-Rnor_6.0-dbSNP149\Rattus_norvegicus-Rnor_6.0-dbSNP149.genometemplate\sequences\NC_005100_chr1.gbk#0	282763074	NC_005100.4	+	3128	207653704..207656831	246073, 621739		Foxi2
Tcerg1l	0.001	0.001	0.768	0.001	1	1	812.961	1	Z-003002	Tcerg1l	gene		D:\assemblies\Rattus_norvegicus-Rnor_6.0-dbSNP149\Rattus_norvegicus-Rnor_6.0-dbSNP149.genometemplate\sequences\NC_005100_chr1.gbk#0	282763074	NC_005100.4	-	188933	210739600..210550668	361669, 1562437		Tcerg1l	RGD1562437
Mapk1ip1	1.85	1.997	75.138	2.079	1.0791	0.960365	36.1385	0.889969	Z-003003	Mapk1ip1	gene		D:\assemblies\Rattus_norvegicus-Rnor_6.0-dbSNP149\Rattus_norvegicus-Rnor_6.0-dbSNP149.genometemplate\sequences\NC_005100_chr1.gbk#0	282763074	NC_005100.4	-	10333	211205772..211195440	499280, 1565431		Mapk1ip1	RGD1565431
Lrrc27	0.005	0.011	0.073	0.001	2.25685	11.8895	77.6572	5.26815	Z-003011	Lrrc27	gene		D:\assemblies\Rattus_norvegicus-Rnor_6.0-dbSNP149\Rattus_norvegicus-Rnor_6.0-dbSNP149.genometemplate\sequences\NC_005100_chr1.gbk#0	282763074	NC_005100.4	+	32073	211543751..211575823	499281, 1559981		Lrrc27	RGD1559981
Msx3	0.092	0.107	0.001	0.474	1.17298	0.226473	0.00199301	0.193074	Z-003030	Msx3	gene		D:\assemblies\Rattus_norvegicus-Rnor_6.0-dbSNP149\Rattus_norvegicus-Rnor_6.0-dbSNP149.genometemplate\sequences\NC_005100_chr1.gbk#0	282763074	NC_005100.4	-	2929	212517151..212514223	114504, 620932		Msx3
Cd163l1	0.001	0.006	0.184	0.001	6.0644	6.0644	194.811	1	Z-003042	Cd163l1	gene		D:\assemblies\Rattus_norvegicus-Rnor_6.0-dbSNP149\Rattus_norvegicus-Rnor_6.0-dbSNP149.genometemplate\sequences\NC_005100_chr1.gbk#0	282763074	NC_005100.4	+	11252	212695735..212706986	293591, 1307378		Cd163l1	RGD1307378
Cyp2e1	0.001	0.005	0.089	0.001	5.58746	5.58746	94.4137	1	Z-003064	Cyp2e1	gene		D:\assemblies\Rattus_norvegicus-Rnor_6.0-dbSNP149\Rattus_norvegicus-Rnor_6.0-dbSNP149.genometemplate\sequences\NC_005100_chr1.gbk#0	282763074	NC_005100.4	+	10304	213511892..213522195	25086, 2475		Cyp2e1	Cyp2e
LOC108348167	0.001	0.001	0.055	0.001	1	1	58.2435	1	Z-003076	LOC108348167	gene		D:\assemblies\Rattus_norvegicus-Rnor_6.0-dbSNP149\Rattus_norvegicus-Rnor_6.0-dbSNP149.genometemplate\sequences\NC_005100_chr1.gbk#0	282763074	NC_005100.4	+	7296	213685384..213692679	108348167		LOC108348167
Ifitm6	27.259	95.183	0.488	40.927	3.49182	2.32571	0.0119327	0.666045	Z-003084	Ifitm6	gene		D:\assemblies\Rattus_norvegicus-Rnor_6.0-dbSNP149\Rattus_norvegicus-Rnor_6.0-dbSNP149.genometemplate\sequences\NC_005100_chr1.gbk#0	282763074	NC_005100.4	-	39605	213856570..213816966	309104, 1304718		Ifitm6
B4galnt4	0.001	0.004	0.511	0.001	4.368	4.368	540.497	1	Z-003085	B4galnt4	gene		D:\assemblies\Rattus_norvegicus-Rnor_6.0-dbSNP149\Rattus_norvegicus-Rnor_6.0-dbSNP149.genometemplate\sequences\NC_005100_chr1.gbk#0	282763074	NC_005100.4	+	10906	213870328..213881233	309105, 1310052		B4galnt4	RGD1310052
Muc2	0.001	0.003	0.157	0.001	3.607	3.607	166.001	1	Z-003132	Muc2	gene		D:\assemblies\Rattus_norvegicus-Rnor_6.0-dbSNP149\Rattus_norvegicus-Rnor_6.0-dbSNP149.genometemplate\sequences\NC_005100_chr1.gbk#0	282763074	NC_005100.4	+	29269	214663929..214693197	24572, 3123		Muc2
Prr33	0.001	0.006	0.247	0.001	6.22254	6.22254	261.42	1	Z-003156	Prr33	gene		D:\assemblies\Rattus_norvegicus-Rnor_6.0-dbSNP149\Rattus_norvegicus-Rnor_6.0-dbSNP149.genometemplate\sequences\NC_005100_chr1.gbk#0	282763074	NC_005100.4	-	7517	215666512..215658996	685580, 1592568		Prr33
Igf2	3.761	0.298	0.001	6.748	0.0791325	0.0441045	0.000140061	0.55735	Z-003163	Igf2	gene		D:\assemblies\Rattus_norvegicus-Rnor_6.0-dbSNP149\Rattus_norvegicus-Rnor_6.0-dbSNP149.genometemplate\sequences\NC_005100_chr1.gbk#0	282763074	NC_005100.4	-	10980	215839081..215828102	24483, 2870		Igf2	IGFII, RNIGF2
LOC103691273	0.001	0.001	1.367	0.001	1	1	1446.38	1	Z-003262	LOC103691273	gene		D:\assemblies\Rattus_norvegicus-Rnor_6.0-dbSNP149\Rattus_norvegicus-Rnor_6.0-dbSNP149.genometemplate\sequences\NC_005100_chr1.gbk#0	282763074	NC_005100.4	-	714	219247276..219246563	103691273, 9288417		LOC103691273
Doc2g	0.001	0.001	5.36	0.001	1	1	5670.81	1	Z-003264	Doc2g	gene		D:\assemblies\Rattus_norvegicus-Rnor_6.0-dbSNP149\Rattus_norvegicus-Rnor_6.0-dbSNP149.genometemplate\sequences\NC_005100_chr1.gbk#0	282763074	NC_005100.4	+	4538	219249253..219253790	293654, 1307473		Doc2g	Doc2gp
RGD1307603	0.007	0.001	7.602	0.001	0.14219	1	8042.97	7.03286	Z-003267	RGD1307603	gene		D:\assemblies\Rattus_norvegicus-Rnor_6.0-dbSNP149\Rattus_norvegicus-Rnor_6.0-dbSNP149.genometemplate\sequences\NC_005100_chr1.gbk#0	282763074	NC_005100.4	-	2648	219312240..219309593	293656, 1307603		RGD1307603
Ptprcap	4.513	7.915	567.099	1.821	1.75387	4.3471	311.457	2.47858	Z-003278	Ptprcap	gene		D:\assemblies\Rattus_norvegicus-Rnor_6.0-dbSNP149\Rattus_norvegicus-Rnor_6.0-dbSNP149.genometemplate\sequences\NC_005100_chr1.gbk#0	282763074	NC_005100.4	+	2160	219403970..219406129	499300, 1559601		Ptprcap
Ankrd13d	0.383	0.778	13.954	0.377	2.03413	2.06385	37.0061	1.01461	Z-003288	Ankrd13d	gene		D:\assemblies\Rattus_norvegicus-Rnor_6.0-dbSNP149\Rattus_norvegicus-Rnor_6.0-dbSNP149.genometemplate\sequences\NC_005100_chr1.gbk#0	282763074	NC_005100.4	-	12403	219532718..219520316	361699, 1309156		Ankrd13d	RGD1309156
Syt12	0.004	0.06	0.001	0.332	13.6884	0.180739	0.00284464	0.0132038	Z-003292	Syt12	gene		D:\assemblies\Rattus_norvegicus-Rnor_6.0-dbSNP149\Rattus_norvegicus-Rnor_6.0-dbSNP149.genometemplate\sequences\NC_005100_chr1.gbk#0	282763074	NC_005100.4	-	29347	219719359..219690013	191595, 621876		Syt12	Srg1
LOC103691278	0.001	0.008	1.998	0.001	8.74165	8.74165	2114.38	1	Z-003344	LOC103691278	gene		D:\assemblies\Rattus_norvegicus-Rnor_6.0-dbSNP149\Rattus_norvegicus-Rnor_6.0-dbSNP149.genometemplate\sequences\NC_005100_chr1.gbk#0	282763074	NC_005100.4	-	2880	220761316..220758437	103691278, 9257852		LOC103691278
Ctsw	0.081	0.082	74.188	0.362	1.01512	0.227085	204.714	0.223703	Z-003353	Ctsw	gene		D:\assemblies\Rattus_norvegicus-Rnor_6.0-dbSNP149\Rattus_norvegicus-Rnor_6.0-dbSNP149.genometemplate\sequences\NC_005100_chr1.gbk#0	282763074	NC_005100.4	-	3389	220847967..220844579	293676, 1309354		Ctsw
Slc22a20	0.005	0.05	0.1	0.001	9.0756	52.5661	105.499	5.79203	Z-003382	Slc22a20	gene		D:\assemblies\Rattus_norvegicus-Rnor_6.0-dbSNP149\Rattus_norvegicus-Rnor_6.0-dbSNP149.genometemplate\sequences\NC_005100_chr1.gbk#0	282763074	NC_005100.4	-	16760	221344367..221327608	293686, 1311460		Slc22a20	Gm963
LOC108349687	1.109	3.601	33.42	2.543	3.24597	1.41616	13.1439	0.436282	Z-003409	LOC108349687	gene		D:\assemblies\Rattus_norvegicus-Rnor_6.0-dbSNP149\Rattus_norvegicus-Rnor_6.0-dbSNP149.genometemplate\sequences\NC_005100_chr1.gbk#0	282763074	NC_005100.4	-	9589	221735365..221725777	108349687		LOC108349687
Ccdc88b	1.051	1.56	56.559	1.757	1.48422	0.887921	32.1946	0.598241	Z-003416	Ccdc88b	gene		D:\assemblies\Rattus_norvegicus-Rnor_6.0-dbSNP149\Rattus_norvegicus-Rnor_6.0-dbSNP149.genometemplate\sequences\NC_005100_chr1.gbk#0	282763074	NC_005100.4	-	16050	222118485..222102436	293698, 1311475		Ccdc88b
LOC108349688	0.001	0.008	0.073	0.001	8.22699	8.22699	77.2074	1	Z-003435	LOC108349688	gene		D:\assemblies\Rattus_norvegicus-Rnor_6.0-dbSNP149\Rattus_norvegicus-Rnor_6.0-dbSNP149.genometemplate\sequences\NC_005100_chr1.gbk#0	282763074	NC_005100.4	-	6324	222438058..222431735	108349688		LOC108349688
LOC102551607	0.001	0.001	0.199	0.001	1	1	210.196	1	Z-003477	LOC102551607	gene		D:\assemblies\Rattus_norvegicus-Rnor_6.0-dbSNP149\Rattus_norvegicus-Rnor_6.0-dbSNP149.genometemplate\sequences\NC_005100_chr1.gbk#0	282763074	NC_005100.4	-	1201	225092429..225091229	102551607, 7587874		LOC102551607
Ppp1r32	0.001	0.004	0.704	0.001	4.65919	4.65919	744.699	1	Z-003513	Ppp1r32	gene		D:\assemblies\Rattus_norvegicus-Rnor_6.0-dbSNP149\Rattus_norvegicus-Rnor_6.0-dbSNP149.genometemplate\sequences\NC_005100_chr1.gbk#0	282763074	NC_005100.4	-	9499	226527903..226518405	252958, 708532		Ppp1r32	Iiig9
LOC103691286	0.648	2.325	13.595	0.708	3.58819	3.28202	19.1913	0.914672	Z-003516	LOC103691286	gene		D:\assemblies\Rattus_norvegicus-Rnor_6.0-dbSNP149\Rattus_norvegicus-Rnor_6.0-dbSNP149.genometemplate\sequences\NC_005100_chr1.gbk#0	282763074	NC_005100.4	-	3686	226599720..226596035	103691286, 9312765		LOC103691286
LOC100910973	73.948	167.859	1462.76	87.253	2.26998	1.92382	16.7645	0.847504	Z-003538	LOC100910973	gene		D:\assemblies\Rattus_norvegicus-Rnor_6.0-dbSNP149\Rattus_norvegicus-Rnor_6.0-dbSNP149.genometemplate\sequences\NC_005100_chr1.gbk#0	282763074	NC_005100.4	-	2909	227113844..227110936	100910973, 6495605		LOC100910973
LOC102557108	0.001	0.001	0.559	0.001	1	1	591.631	1	Z-003540	LOC102557108	gene		D:\assemblies\Rattus_norvegicus-Rnor_6.0-dbSNP149\Rattus_norvegicus-Rnor_6.0-dbSNP149.genometemplate\sequences\NC_005100_chr1.gbk#0	282763074	NC_005100.4	-	164787	227321873..227157087	102557108, 7639871		LOC102557108
Ms4a14	0.004	0.001	0.204	0.001	0.247978	1	215.474	4.03262	Z-003550	Ms4a14	gene		D:\assemblies\Rattus_norvegicus-Rnor_6.0-dbSNP149\Rattus_norvegicus-Rnor_6.0-dbSNP149.genometemplate\sequences\NC_005100_chr1.gbk#0	282763074	NC_005100.4	-	15513	227486953..227471441	293743, 727900		Ms4a14	Sp3111
Ms4a2	0.055	0.116	0.001	0.298	2.12302	0.389276	0.00317601	0.18336	Z-003561	Ms4a2	gene		D:\assemblies\Rattus_norvegicus-Rnor_6.0-dbSNP149\Rattus_norvegicus-Rnor_6.0-dbSNP149.genometemplate\sequences\NC_005100_chr1.gbk#0	282763074	NC_005100.4	-	7950	227965312..227957363	25316, 2598		Ms4a2	Fcer1b, FCIGA, Ms4a1
Ms4a3	4.99	26.806	0.001	7.024	5.37218	3.81654	0.000134562	0.710427	Z-003562	Ms4a3	gene		D:\assemblies\Rattus_norvegicus-Rnor_6.0-dbSNP149\Rattus_norvegicus-Rnor_6.0-dbSNP149.genometemplate\sequences\NC_005100_chr1.gbk#0	282763074	NC_005100.4	-	14904	227994210..227979307	293753, 1310598		Ms4a3
Oosp1	0.001	0.007	0.307	0.001	7.46678	7.46678	324.962	1	Z-003564	Oosp1	gene		D:\assemblies\Rattus_norvegicus-Rnor_6.0-dbSNP149\Rattus_norvegicus-Rnor_6.0-dbSNP149.genometemplate\sequences\NC_005100_chr1.gbk#0	282763074	NC_005100.4	-	26539	228058901..228032363	690893, 1590944		Oosp1
Fam111a	2.737	4.394	0.236	5.314	1.6057	0.82696	0.044375	0.515017	Z-003611	Fam111a	gene		D:\assemblies\Rattus_norvegicus-Rnor_6.0-dbSNP149\Rattus_norvegicus-Rnor_6.0-dbSNP149.genometemplate\sequences\NC_005100_chr1.gbk#0	282763074	NC_005100.4	+	15755	229003778..229019532	499322, 1560913		Fam111a	RGD1560913
LOC102554711	0.001	0.027	3.409	0.001	28.5434	28.5434	3606.66	1	Z-003673	LOC102554711	gene		D:\assemblies\Rattus_norvegicus-Rnor_6.0-dbSNP149\Rattus_norvegicus-Rnor_6.0-dbSNP149.genometemplate\sequences\NC_005100_chr1.gbk#0	282763074	NC_005100.4	+	7342	234631999..234639340	102554711, 7668904		LOC102554711
RGD1560242	0.001	0.006	0.415	0.001	6.13993	6.13993	438.793	1	Z-003713	RGD1560242	gene		D:\assemblies\Rattus_norvegicus-Rnor_6.0-dbSNP149\Rattus_norvegicus-Rnor_6.0-dbSNP149.genometemplate\sequences\NC_005100_chr1.gbk#0	282763074	NC_005100.4	-	122165	241460868..241338704	499334, 1560242		RGD1560242
LOC102556263	0.001	0.092	0.017	0.001	97.2155	97.2155	17.8145	1	Z-003756	LOC102556263	gene		D:\assemblies\Rattus_norvegicus-Rnor_6.0-dbSNP149\Rattus_norvegicus-Rnor_6.0-dbSNP149.genometemplate\sequences\NC_005100_chr1.gbk#0	282763074	NC_005100.4	-	13071	246585195..246572125	102556263, 7628278		LOC102556263
Insl6	0.001	0.001	0.199	0.001	1	1	210.989	1	Z-003771	Insl6	gene		D:\assemblies\Rattus_norvegicus-Rnor_6.0-dbSNP149\Rattus_norvegicus-Rnor_6.0-dbSNP149.genometemplate\sequences\NC_005100_chr1.gbk#0	282763074	NC_005100.4	-	3536	247476827..247473292	50546, 62061		Insl6
Pdcd1lg2	0.001	0.006	2.06	0.001	6.84236	6.84236	2179.21	1	Z-003776	Pdcd1lg2	gene		D:\assemblies\Rattus_norvegicus-Rnor_6.0-dbSNP149\Rattus_norvegicus-Rnor_6.0-dbSNP149.genometemplate\sequences\NC_005100_chr1.gbk#0	282763074	NC_005100.4	+	67078	247562202..247629279	309304, 1306403		Pdcd1lg2
Tpd52l3	0.001	0.006	0.206	0.001	5.99586	5.99586	218.328	1	Z-003783	Tpd52l3	gene		D:\assemblies\Rattus_norvegicus-Rnor_6.0-dbSNP149\Rattus_norvegicus-Rnor_6.0-dbSNP149.genometemplate\sequences\NC_005100_chr1.gbk#0	282763074	NC_005100.4	+	14662	248187429..248202090	293894, 1309391		Tpd52l3	RGD1309391, Trpd52l3
Minpp1	12.922	23.161	0.707	16.178	1.79245	1.43169	0.0437026	0.798733	Z-003803	Minpp1	gene		D:\assemblies\Rattus_norvegicus-Rnor_6.0-dbSNP149\Rattus_norvegicus-Rnor_6.0-dbSNP149.genometemplate\sequences\NC_005100_chr1.gbk#0	282763074	NC_005100.4	+	25694	251045352..251071045	29688, 3089		Minpp1
LOC102548095	3.543	10.03	0.001	5.125	2.83078	1.95723	0.000184424	0.691411	Z-003811	LOC102548095	gene		D:\assemblies\Rattus_norvegicus-Rnor_6.0-dbSNP149\Rattus_norvegicus-Rnor_6.0-dbSNP149.genometemplate\sequences\NC_005100_chr1.gbk#0	282763074	NC_005100.4	+	33764	251757238..251791001	102548095, 7659550		LOC102548095
Ifit3	5.372	9.682	0.338	6.043	1.80228	1.60215	0.0559136	0.888955	Z-003826	Ifit3	gene		D:\assemblies\Rattus_norvegicus-Rnor_6.0-dbSNP149\Rattus_norvegicus-Rnor_6.0-dbSNP149.genometemplate\sequences\NC_005100_chr1.gbk#0	282763074	NC_005100.4	+	5144	252906234..252911377	309526, 1359681		Ifit3
Slc16a12	0.413	0.911	0.001	0.576	2.2038	1.58243	0.0016414	0.718047	Z-003829	Slc16a12	gene		D:\assemblies\Rattus_norvegicus-Rnor_6.0-dbSNP149\Rattus_norvegicus-Rnor_6.0-dbSNP149.genometemplate\sequences\NC_005100_chr1.gbk#0	282763074	NC_005100.4	-	78430	253054500..252976071	309525, 1311468		Slc16a12	RGD1311468
LOC103691349	0.385	0.075	0.001	0.76	0.194124	0.0984797	0.0012441	0.507304	Z-003839	LOC103691349	gene		D:\assemblies\Rattus_norvegicus-Rnor_6.0-dbSNP149\Rattus_norvegicus-Rnor_6.0-dbSNP149.genometemplate\sequences\NC_005100_chr1.gbk#0	282763074	NC_005100.4	+	3833	255136794..255140626	103691349, 9179158		LOC103691349
LOC102553702	0.001	0.301	0.045	0.001	318.689	318.689	47.8114	1	Z-003842	LOC102553702	gene		D:\assemblies\Rattus_norvegicus-Rnor_6.0-dbSNP149\Rattus_norvegicus-Rnor_6.0-dbSNP149.genometemplate\sequences\NC_005100_chr1.gbk#0	282763074	NC_005100.4	+	6086	255416510..255422595	102553702, 7595572		LOC102553702
LOC102549441	0.001	0.001	0.081	0.001	1	1	86.0701	1	Z-003856	LOC102549441	gene		D:\assemblies\Rattus_norvegicus-Rnor_6.0-dbSNP149\Rattus_norvegicus-Rnor_6.0-dbSNP149.genometemplate\sequences\NC_005100_chr1.gbk#0	282763074	NC_005100.4	-	1943	256382689..256380747	102549441, 7597238		LOC102549441
Cyp26a1	0.001	0.008	0.479	0.001	8.03688	8.03688	506.446	1	Z-003857	Cyp26a1	gene		D:\assemblies\Rattus_norvegicus-Rnor_6.0-dbSNP149\Rattus_norvegicus-Rnor_6.0-dbSNP149.genometemplate\sequences\NC_005100_chr1.gbk#0	282763074	NC_005100.4	+	3869	256382861..256386729	154985, 620161		Cyp26a1	Cyp26
MGC93861	0.008	0.055	0.131	0.001	6.5489	58.0013	138.482	8.85665	Z-003927	MGC93861	gene		D:\assemblies\Rattus_norvegicus-Rnor_6.0-dbSNP149\Rattus_norvegicus-Rnor_6.0-dbSNP149.genometemplate\sequences\NC_005100_chr1.gbk#0	282763074	NC_005100.4	+	1360	261298147..261299506	682010, 1588156		MGC93861
Morn4	0.121	0.148	0.001	2.055	1.22223	0.0718031	0.000459938	0.0587476	Z-003928	Morn4	gene		D:\assemblies\Rattus_norvegicus-Rnor_6.0-dbSNP149\Rattus_norvegicus-Rnor_6.0-dbSNP149.genometemplate\sequences\NC_005100_chr1.gbk#0	282763074	NC_005100.4	-	10305	261333383..261323079	293950, 1307336		Morn4	RGD1307336
Nkx2-3	0.001	0.001	0.738	0.001	1	1	780.317	1	Z-003958	Nkx2-3	gene		D:\assemblies\Rattus_norvegicus-Rnor_6.0-dbSNP149\Rattus_norvegicus-Rnor_6.0-dbSNP149.genometemplate\sequences\NC_005100_chr1.gbk#0	282763074	NC_005100.4	+	9806	263361238..263371043	309389, 1308521		Nkx2-3
LOC102551485	0.007	0.497	2.614	0.151	76.1391	3.29874	17.3464	0.0433252	Z-004017	LOC102551485	gene		D:\assemblies\Rattus_norvegicus-Rnor_6.0-dbSNP149\Rattus_norvegicus-Rnor_6.0-dbSNP149.genometemplate\sequences\NC_005100_chr1.gbk#0	282763074	NC_005100.4	-	2379	266050163..266047785	102551485, 7672409		LOC102551485
Neurl1	2.235	3.258	0.001	2.698	1.45757	1.2075	0.000350302	0.828433	Z-004046	Neurl1	gene		D:\assemblies\Rattus_norvegicus-Rnor_6.0-dbSNP149\Rattus_norvegicus-Rnor_6.0-dbSNP149.genometemplate\sequences\NC_005100_chr1.gbk#0	282763074	NC_005100.4	+	85874	266953006..267038879	309459, 1307021		Neurl1	Neurl, Neurl1a
LOC108349533	0.001	0.001	0.242	0.001	1	1	255.704	1	Z-004051	LOC108349533	gene		D:\assemblies\Rattus_norvegicus-Rnor_6.0-dbSNP149\Rattus_norvegicus-Rnor_6.0-dbSNP149.genometemplate\sequences\NC_005100_chr1.gbk#0	282763074	NC_005100.4	+	3345	267282064..267285408	108349533		LOC108349533
LOC102553769	0.001	0.001	0.554	0.001	1	1	585.852	1	Z-004113	LOC102553769	gene		D:\assemblies\Rattus_norvegicus-Rnor_6.0-dbSNP149\Rattus_norvegicus-Rnor_6.0-dbSNP149.genometemplate\sequences\NC_005100_chr1.gbk#0	282763074	NC_005100.4	+	1651	275847187..275848837	102553769, 7709336		LOC102553769
LOC102546765	0.029	0.065	0.229	0.001	2.2712	69.103	242.562	30.4257	Z-004127	LOC102546765	gene		D:\assemblies\Rattus_norvegicus-Rnor_6.0-dbSNP149\Rattus_norvegicus-Rnor_6.0-dbSNP149.genometemplate\sequences\NC_005100_chr1.gbk#0	282763074	NC_005100.4	+	8214	277056773..277064986	102546765, 7718668		LOC102546765
Edil3	0.296	0.001	0.312	0.001	0.0031902	1	330.484	313.46	Z-004274	Edil3	gene		D:\assemblies\Rattus_norvegicus-Rnor_6.0-dbSNP149\Rattus_norvegicus-Rnor_6.0-dbSNP149.genometemplate\sequences\NC_005101_chr2.gbk#0	266435125	NC_005101.4	+	512399	17616116..18128514	688400, 1588887		Edil3
Bhmt2	0.004	0.342	0.001	0.252	78.6875	1.36035	0.0037571	0.017288	Z-004313	Bhmt2	gene		D:\assemblies\Rattus_norvegicus-Rnor_6.0-dbSNP149\Rattus_norvegicus-Rnor_6.0-dbSNP149.genometemplate\sequences\NC_005101_chr2.gbk#0	266435125	NC_005101.4	-	16947	23289266..23272320	365972, 1359418		Bhmt2
Fam169a	0.004	0.001	0.329	0.001	0.250769	1	348.066	3.98774	Z-004354	Fam169a	gene		D:\assemblies\Rattus_norvegicus-Rnor_6.0-dbSNP149\Rattus_norvegicus-Rnor_6.0-dbSNP149.genometemplate\sequences\NC_005101_chr2.gbk#0	266435125	NC_005101.4	+	56322	27884748..27941069	310013, 1590893		Fam169a
LOC102556480	0.001	0.001	0.104	0.001	1	1	110.229	1	Z-004365	LOC102556480	gene		D:\assemblies\Rattus_norvegicus-Rnor_6.0-dbSNP149\Rattus_norvegicus-Rnor_6.0-dbSNP149.genometemplate\sequences\NC_005101_chr2.gbk#0	266435125	NC_005101.4	+	5379	28528768..28534146	102556480, 7710032		LOC102556480
LOC102554754	0.004	0.001	1.575	0.001	0.220131	1	1666.4	4.54274	Z-004392	LOC102554754	gene		D:\assemblies\Rattus_norvegicus-Rnor_6.0-dbSNP149\Rattus_norvegicus-Rnor_6.0-dbSNP149.genometemplate\sequences\NC_005101_chr2.gbk#0	266435125	NC_005101.4	-	3582	30486931..30483350	102554754, 7658944		LOC102554754
LOC102553935	0.001	0.001	0.137	0.001	1	1	144.431	1	Z-004492	LOC102553935	gene		D:\assemblies\Rattus_norvegicus-Rnor_6.0-dbSNP149\Rattus_norvegicus-Rnor_6.0-dbSNP149.genometemplate\sequences\NC_005101_chr2.gbk#0	266435125	NC_005101.4	+	17650	43399079..43416728	102553935, 7683682		LOC102553935
LOC108349944	0.001	0.001	0.885	0.001	1	1	936.665	1	Z-004496	LOC108349944	gene		D:\assemblies\Rattus_norvegicus-Rnor_6.0-dbSNP149\Rattus_norvegicus-Rnor_6.0-dbSNP149.genometemplate\sequences\NC_005101_chr2.gbk#0	266435125	NC_005101.4	+	3015	44024264..44027278	108349944		LOC108349944
Gzma	0.006	0.001	2.096	0.001	0.145875	1	2217.16	6.85517	Z-004513	Gzma	gene		D:\assemblies\Rattus_norvegicus-Rnor_6.0-dbSNP149\Rattus_norvegicus-Rnor_6.0-dbSNP149.genometemplate\sequences\NC_005101_chr2.gbk#0	266435125	NC_005101.4	-	12591	44981436..44968846	266708, 628640		Gzma
Tmem267	0.001	0.001	0.317	0.001	1	1	335.524	1	Z-004555	Tmem267	gene		D:\assemblies\Rattus_norvegicus-Rnor_6.0-dbSNP149\Rattus_norvegicus-Rnor_6.0-dbSNP149.genometemplate\sequences\NC_005101_chr2.gbk#0	266435125	NC_005101.4	+	9627	52356449..52366075	499532, 1562550		Tmem267
Nim1k	0.001	0.09	0.231	0.001	95.2149	95.2149	244.347	1	Z-004561	Nim1k	gene		D:\assemblies\Rattus_norvegicus-Rnor_6.0-dbSNP149\Rattus_norvegicus-Rnor_6.0-dbSNP149.genometemplate\sequences\NC_005101_chr2.gbk#0	266435125	NC_005101.4	-	45392	52494137..52448746	310376, 1308116		Nim1k
LOC102547748	0.007	0.001	0.508	0.001	0.141635	1	537.514	7.06043	Z-004567	LOC102547748	gene		D:\assemblies\Rattus_norvegicus-Rnor_6.0-dbSNP149\Rattus_norvegicus-Rnor_6.0-dbSNP149.genometemplate\sequences\NC_005101_chr2.gbk#0	266435125	NC_005101.4	-	3637	52728598..52724962	102547748, 7525204		LOC102547748
LOC102547847	0.001	0.001	4.131	0.001	1	1	4370.45	1	Z-004569	LOC102547847	gene		D:\assemblies\Rattus_norvegicus-Rnor_6.0-dbSNP149\Rattus_norvegicus-Rnor_6.0-dbSNP149.genometemplate\sequences\NC_005101_chr2.gbk#0	266435125	NC_005101.4	+	3867	52781939..52785805	102547847, 7643568		LOC102547847
LOC103691472	0.001	0.001	0.637	0.001	1	1	674.436	1	Z-004574	LOC103691472	gene		D:\assemblies\Rattus_norvegicus-Rnor_6.0-dbSNP149\Rattus_norvegicus-Rnor_6.0-dbSNP149.genometemplate\sequences\NC_005101_chr2.gbk#0	266435125	NC_005101.4	+	17610	53126203..53143812	103691472, 9428698		LOC103691472
Rpl37	182.597	368.775	3207.71	189.057	2.01961	1.9506	16.9669	0.965831	Z-004589	Rpl37	gene		D:\assemblies\Rattus_norvegicus-Rnor_6.0-dbSNP149\Rattus_norvegicus-Rnor_6.0-dbSNP149.genometemplate\sequences\NC_005101_chr2.gbk#0	266435125	NC_005101.4	+	1954	54832634..54834587	81770, 621204		Rpl37
LOC103691476	0.001	0.001	0.15	0.001	1	1	158.748	1	Z-004594	LOC103691476	gene		D:\assemblies\Rattus_norvegicus-Rnor_6.0-dbSNP149\Rattus_norvegicus-Rnor_6.0-dbSNP149.genometemplate\sequences\NC_005101_chr2.gbk#0	266435125	NC_005101.4	+	3466	55306077..55309542	103691476, 9459067		LOC103691476
LOC108349963	0.001	0.001	0.177	0.001	1	1	187.738	1	Z-004627	LOC108349963	gene		D:\assemblies\Rattus_norvegicus-Rnor_6.0-dbSNP149\Rattus_norvegicus-Rnor_6.0-dbSNP149.genometemplate\sequences\NC_005101_chr2.gbk#0	266435125	NC_005101.4	+	8352	58911369..58919720	108349963		LOC108349963
LOC108349965	0.001	0.001	1.684	0.001	1	1	1781.6	1	Z-004637	LOC108349965	gene		D:\assemblies\Rattus_norvegicus-Rnor_6.0-dbSNP149\Rattus_norvegicus-Rnor_6.0-dbSNP149.genometemplate\sequences\NC_005101_chr2.gbk#0	266435125	NC_005101.4	-	10410	60487019..60476610	108349965		LOC108349965
LOC103691483	0.095	0.685	0.555	0.001	7.18174	724.45	587.485	100.874	Z-004640	LOC103691483	gene		D:\assemblies\Rattus_norvegicus-Rnor_6.0-dbSNP149\Rattus_norvegicus-Rnor_6.0-dbSNP149.genometemplate\sequences\NC_005101_chr2.gbk#0	266435125	NC_005101.4	+	8165	60735521..60743685	103691483, 9387191		LOC103691483
Fam105a	1.583	0.176	20.839	0.991	0.111102	0.177508	21.0371	1.5977	Z-004696	Fam105a	gene		D:\assemblies\Rattus_norvegicus-Rnor_6.0-dbSNP149\Rattus_norvegicus-Rnor_6.0-dbSNP149.genometemplate\sequences\NC_005101_chr2.gbk#0	266435125	NC_005101.4	-	25031	80408672..80383642	310190, 1563205		Fam105a
Car2	235.301	554.565	10.519	324.417	2.35683	1.70942	0.0324242	0.725305	Z-004732	Car2	gene		D:\assemblies\Rattus_norvegicus-Rnor_6.0-dbSNP149\Rattus_norvegicus-Rnor_6.0-dbSNP149.genometemplate\sequences\NC_005101_chr2.gbk#0	266435125	NC_005101.4	-	15129	88112868..88097740	54231, 2240		Car2	Ca2
tGap1	0.001	0.001	0.409	0.001	1	1	432.57	1	Z-004752	tGap1	gene		D:\assemblies\Rattus_norvegicus-Rnor_6.0-dbSNP149\Rattus_norvegicus-Rnor_6.0-dbSNP149.genometemplate\sequences\NC_005101_chr2.gbk#0	266435125	NC_005101.4	+	76530	92549413..92625942	294892, 1359558		tGap1
LOC102546934	0.001	0.021	0.043	0.001	21.8638	21.8638	45.7207	1	Z-004778	LOC102546934	gene		D:\assemblies\Rattus_norvegicus-Rnor_6.0-dbSNP149\Rattus_norvegicus-Rnor_6.0-dbSNP149.genometemplate\sequences\NC_005101_chr2.gbk#0	266435125	NC_005101.4	-	7116	95010185..95003070	102546934, 7537942		LOC102546934
LOC102550696	0.208	0.337	0.001	0.304	1.62203	1.10805	0.00310731	0.683121	Z-004791	LOC102550696	gene		D:\assemblies\Rattus_norvegicus-Rnor_6.0-dbSNP149\Rattus_norvegicus-Rnor_6.0-dbSNP149.genometemplate\sequences\NC_005101_chr2.gbk#0	266435125	NC_005101.4	-	17569	97680496..97662928	102550696, 7672274		LOC102550696
Trim55	0.048	1.282	0.001	0.409	26.7495	3.13105	0.00230847	0.117051	Z-004822	Trim55	gene		D:\assemblies\Rattus_norvegicus-Rnor_6.0-dbSNP149\Rattus_norvegicus-Rnor_6.0-dbSNP149.genometemplate\sequences\NC_005101_chr2.gbk#0	266435125	NC_005101.4	+	42146	104416972..104459117	365751, 1306943		Trim55	Rnf29
Cpa3	0.758	0.31	0.001	1.34	0.408258	0.231018	0.000705339	0.565862	Z-004829	Cpa3	gene		D:\assemblies\Rattus_norvegicus-Rnor_6.0-dbSNP149\Rattus_norvegicus-Rnor_6.0-dbSNP149.genometemplate\sequences\NC_005101_chr2.gbk#0	266435125	NC_005101.4	-	31192	105047989..105016798	54242, 2390		Cpa3
LOC499584	0.001	0.006	0.173	0.001	6.11335	6.11335	182.653	1	Z-004845	LOC499584	gene		D:\assemblies\Rattus_norvegicus-Rnor_6.0-dbSNP149\Rattus_norvegicus-Rnor_6.0-dbSNP149.genometemplate\sequences\NC_005101_chr2.gbk#0	266435125	NC_005101.4	+	23280	110306363..110329642	499584, 1560081		LOC499584
LOC102552193	0.001	0.001	1.61	0.001	1	1	1703.99	1	Z-004881	LOC102552193	gene		D:\assemblies\Rattus_norvegicus-Rnor_6.0-dbSNP149\Rattus_norvegicus-Rnor_6.0-dbSNP149.genometemplate\sequences\NC_005101_chr2.gbk#0	266435125	NC_005101.4	-	18852	115413345..115394494	102552193, 7552769		LOC102552193
Sec62	4.278	9.559	62.334	7.258	2.23456	1.31707	8.58846	0.589409	Z-004892	Sec62	gene		D:\assemblies\Rattus_norvegicus-Rnor_6.0-dbSNP149\Rattus_norvegicus-Rnor_6.0-dbSNP149.genometemplate\sequences\NC_005101_chr2.gbk#0	266435125	NC_005101.4	-	36775	116225510..116188736	294912, 1308862		Sec62	Ab2-292, Tloc1
Terc	0.001	0.012	0.619	0.001	12.5968	12.5968	655.292	1	Z-004906	Terc	gene		D:\assemblies\Rattus_norvegicus-Rnor_6.0-dbSNP149\Rattus_norvegicus-Rnor_6.0-dbSNP149.genometemplate\sequences\NC_005101_chr2.gbk#0	266435125	NC_005101.4	+	388	116432723..116433110	378461, 727802		Terc	Tr
Trpc3	0.003	0.027	0.092	0.001	8.66776	28.9517	97.3326	3.34016	Z-004963	Trpc3	gene		D:\assemblies\Rattus_norvegicus-Rnor_6.0-dbSNP149\Rattus_norvegicus-Rnor_6.0-dbSNP149.genometemplate\sequences\NC_005101_chr2.gbk#0	266435125	NC_005101.4	-	137621	123467574..123329954	60395, 61973		Trpc3	TrpC3c, Trrp3
Il2	0.001	0.001	0.673	0.001	1	1	711.894	1	Z-004966	Il2	gene		D:\assemblies\Rattus_norvegicus-Rnor_6.0-dbSNP149\Rattus_norvegicus-Rnor_6.0-dbSNP149.genometemplate\sequences\NC_005101_chr2.gbk#0	266435125	NC_005101.4	-	4705	123851854..123847150	116562, 620047		Il2
Il21	0.001	0.001	0.272	0.001	1	1	288.269	1	Z-004967	Il21	gene		D:\assemblies\Rattus_norvegicus-Rnor_6.0-dbSNP149\Rattus_norvegicus-Rnor_6.0-dbSNP149.genometemplate\sequences\NC_005101_chr2.gbk#0	266435125	NC_005101.4	-	7336	123972356..123965021	365769, 1307384		Il21	IL-21
Nudt6	0.039	1.955	8.937	0.644	49.5944	3.03554	13.878	0.0612073	Z-004971	Nudt6	gene		D:\assemblies\Rattus_norvegicus-Rnor_6.0-dbSNP149\Rattus_norvegicus-Rnor_6.0-dbSNP149.genometemplate\sequences\NC_005101_chr2.gbk#0	266435125	NC_005101.4	-	15524	124149824..124134301	207120, 621356		Nudt6	Gfg
Pabpc4l	0.008	3.409	0.001	0.472	434.315	7.22792	0.00200366	0.0166421	Z-005008	Pabpc4l	gene		D:\assemblies\Rattus_norvegicus-Rnor_6.0-dbSNP149\Rattus_norvegicus-Rnor_6.0-dbSNP149.genometemplate\sequences\NC_005101_chr2.gbk#0	266435125	NC_005101.4	-	1991	130658202..130656212	295010, 1559517		Pabpc4l	RGD1559517
LOC108350005	0.001	0.001	0.336	0.001	1	1	355.16	1	Z-005028	LOC108350005	gene		D:\assemblies\Rattus_norvegicus-Rnor_6.0-dbSNP149\Rattus_norvegicus-Rnor_6.0-dbSNP149.genometemplate\sequences\NC_005101_chr2.gbk#0	266435125	NC_005101.4	-	49146	139419752..139370607	108350005		LOC108350005
Slc7a11	0.001	0.004	1.157	0.001	4.4741	4.4741	1223.96	1	Z-005029	Slc7a11	gene		D:\assemblies\Rattus_norvegicus-Rnor_6.0-dbSNP149\Rattus_norvegicus-Rnor_6.0-dbSNP149.genometemplate\sequences\NC_005101_chr2.gbk#0	266435125	NC_005101.4	-	74706	139528479..139453774	310392, 1309275		Slc7a11
LOC102552778	0.007	0.065	0.001	0.309	8.99768	0.211184	0.00305407	0.023471	Z-005086	LOC102552778	gene		D:\assemblies\Rattus_norvegicus-Rnor_6.0-dbSNP149\Rattus_norvegicus-Rnor_6.0-dbSNP149.genometemplate\sequences\NC_005101_chr2.gbk#0	266435125	NC_005101.4	+	2552	145221431..145223982	102552778, 7664166		LOC102552778
Tm4sf4	0.005	0.069	0.001	0.527	13.4545	0.130776	0.0017931	0.00971992	Z-005092	Tm4sf4	gene		D:\assemblies\Rattus_norvegicus-Rnor_6.0-dbSNP149\Rattus_norvegicus-Rnor_6.0-dbSNP149.genometemplate\sequences\NC_005101_chr2.gbk#0	266435125	NC_005101.4	+	15223	147532032..147547254	116467, 621784		Tm4sf4	Lrtm4
Erich6	0.001	0.004	0.174	0.001	4.14961	4.14961	184.628	1	Z-005106	Erich6	gene		D:\assemblies\Rattus_norvegicus-Rnor_6.0-dbSNP149\Rattus_norvegicus-Rnor_6.0-dbSNP149.genometemplate\sequences\NC_005101_chr2.gbk#0	266435125	NC_005101.4	-	49411	148861470..148812060	499626, 1559451		Erich6	Fam194a
Gpr171	0.046	0.008	17.428	0.327	0.167643	0.0233314	53.262	0.139174	Z-005111	Gpr171	gene		D:\assemblies\Rattus_norvegicus-Rnor_6.0-dbSNP149\Rattus_norvegicus-Rnor_6.0-dbSNP149.genometemplate\sequences\NC_005101_chr2.gbk#0	266435125	NC_005101.4	-	8611	149328055..149319445	688737, 1585271		Gpr171
P2ry1	1.704	0.283	0.001	1.545	0.16632	0.183382	0.000611722	1.10258	Z-005131	P2ry1	gene		D:\assemblies\Rattus_norvegicus-Rnor_6.0-dbSNP149\Rattus_norvegicus-Rnor_6.0-dbSNP149.genometemplate\sequences\NC_005101_chr2.gbk#0	266435125	NC_005101.4	+	5495	151314818..151320312	25265, 3242		P2ry1	P2y, P2y1
Veph1	0.206	0.082	0.001	0.354	0.398281	0.231208	0.00266871	0.580514	Z-005185	Veph1	gene		D:\assemblies\Rattus_norvegicus-Rnor_6.0-dbSNP149\Rattus_norvegicus-Rnor_6.0-dbSNP149.genometemplate\sequences\NC_005101_chr2.gbk#0	266435125	NC_005101.4	-	286884	158156266..157869383	361954, 1308217		Veph1	RGD1308217
Shox2	7.116	3.28	0.001	6.199	0.461021	0.529179	0.000152464	1.14784	Z-005190	Shox2	gene		D:\assemblies\Rattus_norvegicus-Rnor_6.0-dbSNP149\Rattus_norvegicus-Rnor_6.0-dbSNP149.genometemplate\sequences\NC_005101_chr2.gbk#0	266435125	NC_005101.4	-	8609	164126783..164118175	25546, 3674		Shox2
LOC100362176	2.598	3.328	0.001	3.385	1.28099	0.983082	0.000279198	0.767436	Z-005200	LOC100362176	gene		D:\assemblies\Rattus_norvegicus-Rnor_6.0-dbSNP149\Rattus_norvegicus-Rnor_6.0-dbSNP149.genometemplate\sequences\NC_005101_chr2.gbk#0	266435125	NC_005101.4	+	2548	165486809..165489356	100362176, 2318708		LOC100362176
LOC108350043	0.535	2.017	0.001	0.499	3.77161	4.03919	0.00189291	1.07095	Z-005253	LOC108350043	gene		D:\assemblies\Rattus_norvegicus-Rnor_6.0-dbSNP149\Rattus_norvegicus-Rnor_6.0-dbSNP149.genometemplate\sequences\NC_005101_chr2.gbk#0	266435125	NC_005101.4	+	16520	178520260..178536779	108350043		LOC108350043
Pdgfc	0.562	2.378	0.001	0.928	4.23184	2.5629	0.00101874	0.605624	Z-005260	Pdgfc	gene		D:\assemblies\Rattus_norvegicus-Rnor_6.0-dbSNP149\Rattus_norvegicus-Rnor_6.0-dbSNP149.genometemplate\sequences\NC_005101_chr2.gbk#0	266435125	NC_005101.4	+	174671	179952227..180126897	79429, 68410		Pdgfc	SCDGF
LOC499644	0.005	0.028	0.099	0.001	5.10596	29.1583	104.801	5.71064	Z-005267	LOC499644	gene		D:\assemblies\Rattus_norvegicus-Rnor_6.0-dbSNP149\Rattus_norvegicus-Rnor_6.0-dbSNP149.genometemplate\sequences\NC_005101_chr2.gbk#0	266435125	NC_005101.4	+	3691	181296061..181299751	499644, 1593166		LOC499644
LOC679811	1.287	1.177	40.318	1.562	0.914517	0.753206	25.8059	0.823611	Z-005285	LOC679811	gene		D:\assemblies\Rattus_norvegicus-Rnor_6.0-dbSNP149\Rattus_norvegicus-Rnor_6.0-dbSNP149.genometemplate\sequences\NC_005101_chr2.gbk#0	266435125	NC_005101.4	-	133942	183031273..182897332	679811, 1583677		LOC679811
LOC102551030	0.004	0.004	0.234	0.001	1.17911	4.63691	247.657	3.93257	Z-005296	LOC102551030	gene		D:\assemblies\Rattus_norvegicus-Rnor_6.0-dbSNP149\Rattus_norvegicus-Rnor_6.0-dbSNP149.genometemplate\sequences\NC_005101_chr2.gbk#0	266435125	NC_005101.4	+	7433	183798012..183805444	102551030, 7653266		LOC102551030
Cd5l	19.157	25.474	1.51	23.295	1.32971	1.09353	0.0648285	0.822384	Z-005327	Cd5l	gene		D:\assemblies\Rattus_norvegicus-Rnor_6.0-dbSNP149\Rattus_norvegicus-Rnor_6.0-dbSNP149.genometemplate\sequences\NC_005101_chr2.gbk#0	266435125	NC_005101.4	+	11014	186685104..186696117	310693, 1308526		Cd5l
Fcrl1	0.717	2.345	30.328	2.147	3.27209	1.09205	14.1257	0.333747	Z-005328	Fcrl1	gene		D:\assemblies\Rattus_norvegicus-Rnor_6.0-dbSNP149\Rattus_norvegicus-Rnor_6.0-dbSNP149.genometemplate\sequences\NC_005101_chr2.gbk#0	266435125	NC_005101.4	+	21895	186702311..186724205	680665, 1589411		Fcrl1
LOC108350053	0.195	1.145	4.278	0.209	5.86232	5.48335	20.4828	0.935355	Z-005329	LOC108350053	gene		D:\assemblies\Rattus_norvegicus-Rnor_6.0-dbSNP149\Rattus_norvegicus-Rnor_6.0-dbSNP149.genometemplate\sequences\NC_005101_chr2.gbk#0	266435125	NC_005101.4	-	15570	186764475..186748906	108350053		LOC108350053
Fcrl3	0.007	0.005	4.124	0.001	0.748099	5.76951	4363.87	7.71222	Z-005330	Fcrl3	gene		D:\assemblies\Rattus_norvegicus-Rnor_6.0-dbSNP149\Rattus_norvegicus-Rnor_6.0-dbSNP149.genometemplate\sequences\NC_005101_chr2.gbk#0	266435125	NC_005101.4	+	21435	186776466..186797900	680697, 1589379		Fcrl3
Ntrk1	0.001	0.004	0.24	0.001	4.75802	4.75802	253.799	1	Z-005339	Ntrk1	gene		D:\assemblies\Rattus_norvegicus-Rnor_6.0-dbSNP149\Rattus_norvegicus-Rnor_6.0-dbSNP149.genometemplate\sequences\NC_005101_chr2.gbk#0	266435125	NC_005101.4	-	16806	187160373..187143568	59109, 620144		Ntrk1	Trk
LOC102547113	0.001	0.004	0.164	0.001	4.22298	4.22298	173.667	1	Z-005357	LOC102547113	gene		D:\assemblies\Rattus_norvegicus-Rnor_6.0-dbSNP149\Rattus_norvegicus-Rnor_6.0-dbSNP149.genometemplate\sequences\NC_005101_chr2.gbk#0	266435125	NC_005101.4	+	5946	187564786..187570731	102547113, 7658407		LOC102547113
Tmem79	0.006	0.006	0.089	0.001	1.07895	6.46681	94.4349	5.99363	Z-005366	Tmem79	gene		D:\assemblies\Rattus_norvegicus-Rnor_6.0-dbSNP149\Rattus_norvegicus-Rnor_6.0-dbSNP149.genometemplate\sequences\NC_005101_chr2.gbk#0	266435125	NC_005101.4	-	4931	187706452..187701522	310626, 1309886		Tmem79	RGD1309886
LOC102550325	0.007	1.337	0.001	0.379	183.567	3.5318	0.0024968	0.0192398	Z-005409	LOC102550325	gene		D:\assemblies\Rattus_norvegicus-Rnor_6.0-dbSNP149\Rattus_norvegicus-Rnor_6.0-dbSNP149.genometemplate\sequences\NC_005101_chr2.gbk#0	266435125	NC_005101.4	-	1358	188601934..188600577	102550325, 7747030		LOC102550325
Dcst1	0.001	0.051	0.049	0.001	53.9949	53.9949	51.9494	1	Z-005414	Dcst1	gene		D:\assemblies\Rattus_norvegicus-Rnor_6.0-dbSNP149\Rattus_norvegicus-Rnor_6.0-dbSNP149.genometemplate\sequences\NC_005101_chr2.gbk#0	266435125	NC_005101.4	-	17456	188690004..188672549	295246, 1307756		Dcst1
Flad1	2.507	3.827	26.548	3.209	1.52654	1.19274	8.27382	0.781337	Z-005418	Flad1	gene		D:\assemblies\Rattus_norvegicus-Rnor_6.0-dbSNP149\Rattus_norvegicus-Rnor_6.0-dbSNP149.genometemplate\sequences\NC_005101_chr2.gbk#0	266435125	NC_005101.4	-	9469	188736462..188726994	751787, 1593292		Flad1
S100a5	0.001	0.001	19.925	0.001	1	1	21081.4	1	Z-005475	S100a5	gene		D:\assemblies\Rattus_norvegicus-Rnor_6.0-dbSNP149\Rattus_norvegicus-Rnor_6.0-dbSNP149.genometemplate\sequences\NC_005101_chr2.gbk#0	266435125	NC_005101.4	+	6209	189999669..190005877	295211, 1308996		S100a5
S100a9	1777.3	7089.36	0.537	2453.11	3.98885	2.88995	0.000218922	0.724507	Z-005479	S100a9	gene		D:\assemblies\Rattus_norvegicus-Rnor_6.0-dbSNP149\Rattus_norvegicus-Rnor_6.0-dbSNP149.genometemplate\sequences\NC_005101_chr2.gbk#0	266435125	NC_005101.4	-	2774	190100209..190097436	94195, 620267		S100a9	Mrp14
LOC102549828	0.001	0.001	0.117	0.001	1	1	123.43	1	Z-005518	LOC102549828	gene		D:\assemblies\Rattus_norvegicus-Rnor_6.0-dbSNP149\Rattus_norvegicus-Rnor_6.0-dbSNP149.genometemplate\sequences\NC_005101_chr2.gbk#0	266435125	NC_005101.4	-	617	193052020..193051404	102549828, 7738003		LOC102549828
LOC102549724	0.001	0.001	0.117	0.001	1	1	123.43	1	Z-005519	LOC102549724	gene		D:\assemblies\Rattus_norvegicus-Rnor_6.0-dbSNP149\Rattus_norvegicus-Rnor_6.0-dbSNP149.genometemplate\sequences\NC_005101_chr2.gbk#0	266435125	NC_005101.4	-	1635	193064393..193062759	102549724, 7541409		LOC102549724
LOC103689947	12.853	25.652	1.335	19.7	1.99578	1.30212	0.0677799	0.652435	Z-005559	LOC103689947	gene		D:\assemblies\Rattus_norvegicus-Rnor_6.0-dbSNP149\Rattus_norvegicus-Rnor_6.0-dbSNP149.genometemplate\sequences\NC_005101_chr2.gbk#0	266435125	NC_005101.4	-	7194	195423665..195416472	103689947, 9292945		LOC103689947
LOC102547008	0.001	0.001	2.007	0.001	1	1	2123.72	1	Z-005584	LOC102547008	gene		D:\assemblies\Rattus_norvegicus-Rnor_6.0-dbSNP149\Rattus_norvegicus-Rnor_6.0-dbSNP149.genometemplate\sequences\NC_005101_chr2.gbk#0	266435125	NC_005101.4	-	977	196161673..196160697	102547008, 7708651		LOC102547008
Nudt17	0.006	0.008	3.704	0.001	1.34974	8.09065	3918.58	5.99424	Z-005699	Nudt17	gene		D:\assemblies\Rattus_norvegicus-Rnor_6.0-dbSNP149\Rattus_norvegicus-Rnor_6.0-dbSNP149.genometemplate\sequences\NC_005101_chr2.gbk#0	266435125	NC_005101.4	-	4646	198836191..198831546	502584, 1565469		Nudt17	RGD1565469
Cd160	0.001	0.001	2.616	0.001	1	1	2767.88	1	Z-005702	Cd160	gene		D:\assemblies\Rattus_norvegicus-Rnor_6.0-dbSNP149\Rattus_norvegicus-Rnor_6.0-dbSNP149.genometemplate\sequences\NC_005101_chr2.gbk#0	266435125	NC_005101.4	-	31700	198965380..198933681	502585, 1563598		Cd160
Acp6	1.812	4.809	26.247	2.056	2.6545	2.33845	12.7634	0.880939	Z-005710	Acp6	gene		D:\assemblies\Rattus_norvegicus-Rnor_6.0-dbSNP149\Rattus_norvegicus-Rnor_6.0-dbSNP149.genometemplate\sequences\NC_005101_chr2.gbk#0	266435125	NC_005101.4	+	21617	199284177..199305793	295305, 1306336		Acp6
LOC690468	84.501	231.42	2821.84	106.003	2.73865	2.18315	26.6205	0.797164	Z-005714	LOC690468	gene		D:\assemblies\Rattus_norvegicus-Rnor_6.0-dbSNP149\Rattus_norvegicus-Rnor_6.0-dbSNP149.genometemplate\sequences\NC_005101_chr2.gbk#0	266435125	NC_005101.4	-	325	199479316..199478992	690468, 1596041		LOC690468
Ampd1	0.007	0.006	0.101	0.001	0.879645	6.13604	106.909	6.97559	Z-005781	Ampd1	gene		D:\assemblies\Rattus_norvegicus-Rnor_6.0-dbSNP149\Rattus_norvegicus-Rnor_6.0-dbSNP149.genometemplate\sequences\NC_005101_chr2.gbk#0	266435125	NC_005101.4	+	21028	205568934..205589961	25028, 2109		Ampd1	Ampd01, RATAMPD01
Ptpn22	0.692	0.718	44.881	0.64	1.03818	1.12234	70.1192	1.08106	Z-005796	Ptpn22	gene		D:\assemblies\Rattus_norvegicus-Rnor_6.0-dbSNP149\Rattus_norvegicus-Rnor_6.0-dbSNP149.genometemplate\sequences\NC_005101_chr2.gbk#0	266435125	NC_005101.4	+	48283	206342066..206390348	295338, 1307992		Ptpn22	Ptpn8
Fam19a3	0.001	0.009	1.474	0.001	9.24877	9.24877	1559.81	1	Z-005814	Fam19a3	gene		D:\assemblies\Rattus_norvegicus-Rnor_6.0-dbSNP149\Rattus_norvegicus-Rnor_6.0-dbSNP149.genometemplate\sequences\NC_005101_chr2.gbk#0	266435125	NC_005101.4	-	9963	207258962..207249000	691123, 1587462		Fam19a3
Adora3	0.001	0.006	0.232	0.001	6.64655	6.64655	245.132	1	Z-005834	Adora3	gene		D:\assemblies\Rattus_norvegicus-Rnor_6.0-dbSNP149\Rattus_norvegicus-Rnor_6.0-dbSNP149.genometemplate\sequences\NC_005101_chr2.gbk#0	266435125	NC_005101.4	+	42309	208336909..208379217	25370, 2051		Adora3	Tgpcr1
LOC100911796	0.001	0.006	0.232	0.001	6.64988	6.64988	245.458	1	Z-005839	LOC100911796	gene		D:\assemblies\Rattus_norvegicus-Rnor_6.0-dbSNP149\Rattus_norvegicus-Rnor_6.0-dbSNP149.genometemplate\sequences\NC_005101_chr2.gbk#0	266435125	NC_005101.4	+	44680	208492231..208536910	100911796, 6491091		LOC100911796
LOC102555268	0.001	0.004	7.766	0.001	4.3216	4.3216	8217.12	1	Z-005851	LOC102555268	gene		D:\assemblies\Rattus_norvegicus-Rnor_6.0-dbSNP149\Rattus_norvegicus-Rnor_6.0-dbSNP149.genometemplate\sequences\NC_005101_chr2.gbk#0	266435125	NC_005101.4	-	28181	209082897..209054717	102555268, 7544832		LOC102555268
LOC100912312	0.007	0.801	198.678	0.247	118.311	3.24799	805.546	0.0274529	Z-005852	LOC100912312	gene		D:\assemblies\Rattus_norvegicus-Rnor_6.0-dbSNP149\Rattus_norvegicus-Rnor_6.0-dbSNP149.genometemplate\sequences\NC_005101_chr2.gbk#0	266435125	NC_005101.4	-	4571	209100185..209095615	100912312, 6487716		LOC100912312
LOC102548358	0.071	0.001	1.064	0.001	0.0133792	1	1125.46	74.7429	Z-005946	LOC102548358	gene		D:\assemblies\Rattus_norvegicus-Rnor_6.0-dbSNP149\Rattus_norvegicus-Rnor_6.0-dbSNP149.genometemplate\sequences\NC_005101_chr2.gbk#0	266435125	NC_005101.4	-	4160	218730361..218726202	102548358, 7567274		LOC102548358
LOC100912479	0.001	0.001	0.915	0.001	1	1	968.507	1	Z-005951	LOC100912479	gene		D:\assemblies\Rattus_norvegicus-Rnor_6.0-dbSNP149\Rattus_norvegicus-Rnor_6.0-dbSNP149.genometemplate\sequences\NC_005101_chr2.gbk#0	266435125	NC_005101.4	-	6206	219097828..219091623	100912479, 6486580		LOC100912479
LOC102548573	0.007	0.072	0.001	0.737	9.86669	0.0973617	0.00128307	0.00986772	Z-005966	LOC102548573	gene		D:\assemblies\Rattus_norvegicus-Rnor_6.0-dbSNP149\Rattus_norvegicus-Rnor_6.0-dbSNP149.genometemplate\sequences\NC_005101_chr2.gbk#0	266435125	NC_005101.4	-	1584	220413049..220411466	102548573, 7718047		LOC102548573
LOC103691682	0.001	0.001	0.625	0.001	1	1	661.565	1	Z-005980	LOC103691682	gene		D:\assemblies\Rattus_norvegicus-Rnor_6.0-dbSNP149\Rattus_norvegicus-Rnor_6.0-dbSNP149.genometemplate\sequences\NC_005101_chr2.gbk#0	266435125	NC_005101.4	-	3063	222937839..222934777	103691682		LOC103691682
LOC103691684	0.001	0.001	0.073	0.001	1	1	77.5756	1	Z-005985	LOC103691684	gene		D:\assemblies\Rattus_norvegicus-Rnor_6.0-dbSNP149\Rattus_norvegicus-Rnor_6.0-dbSNP149.genometemplate\sequences\NC_005101_chr2.gbk#0	266435125	NC_005101.4	+	15351	223576500..223591850	103691684, 9266109		LOC103691684
Pde5a	6.819	9.707	0.041	9.071	1.42347	1.07015	0.00453938	0.751792	Z-006015	Pde5a	gene		D:\assemblies\Rattus_norvegicus-Rnor_6.0-dbSNP149\Rattus_norvegicus-Rnor_6.0-dbSNP149.genometemplate\sequences\NC_005101_chr2.gbk#0	266435125	NC_005101.4	+	145313	226899604..227044916	171115, 620995		Pde5a	PDE5A2
LOC102553582	0.001	0.029	0.247	0.001	31.1625	31.1625	260.84	1	Z-006108	LOC102553582	gene		D:\assemblies\Rattus_norvegicus-Rnor_6.0-dbSNP149\Rattus_norvegicus-Rnor_6.0-dbSNP149.genometemplate\sequences\NC_005101_chr2.gbk#0	266435125	NC_005101.4	-	1293	237925445..237924153	102553582, 7698848		LOC102553582
LOC102546359	0.001	0.19	0.216	0.001	201.392	201.392	228.81	1	Z-006116	LOC102546359	gene		D:\assemblies\Rattus_norvegicus-Rnor_6.0-dbSNP149\Rattus_norvegicus-Rnor_6.0-dbSNP149.genometemplate\sequences\NC_005101_chr2.gbk#0	266435125	NC_005101.4	-	1460	238527420..238525961	102546359, 7572082		LOC102546359
LOC100362967	0.001	0.02	0.304	0.001	21.4703	21.4703	322.142	1	Z-006119	LOC100362967	gene		D:\assemblies\Rattus_norvegicus-Rnor_6.0-dbSNP149\Rattus_norvegicus-Rnor_6.0-dbSNP149.genometemplate\sequences\NC_005101_chr2.gbk#0	266435125	NC_005101.4	+	407	238839535..238839941	100362967, 2323726		LOC100362967
Cxxc4	1.169	0.127	0.001	0.908	0.108642	0.139896	0.00104124	1.28768	Z-006122	Cxxc4	gene		D:\assemblies\Rattus_norvegicus-Rnor_6.0-dbSNP149\Rattus_norvegicus-Rnor_6.0-dbSNP149.genometemplate\sequences\NC_005101_chr2.gbk#0	266435125	NC_005101.4	+	24759	239414882..239439640	83824, 69228		Cxxc4	Idax
Slc9b1	0.005	0.001	0.225	0.001	0.178894	1	238.59	5.58989	Z-006128	Slc9b1	gene		D:\assemblies\Rattus_norvegicus-Rnor_6.0-dbSNP149\Rattus_norvegicus-Rnor_6.0-dbSNP149.genometemplate\sequences\NC_005101_chr2.gbk#0	266435125	NC_005101.4	+	54497	240527120..240581616	365946, 1305087		Slc9b1	Nhedc1, Nhedc2, RGD1305087
Bank1	0.708	0.617	6.259	0.59	0.870846	1.04429	10.6013	1.19916	Z-006137	Bank1	gene		D:\assemblies\Rattus_norvegicus-Rnor_6.0-dbSNP149\Rattus_norvegicus-Rnor_6.0-dbSNP149.genometemplate\sequences\NC_005101_chr2.gbk#0	266435125	NC_005101.4	-	271765	241545527..241273763	365948, 1564639		Bank1	LRRGT00104
Emcn	12.633	17.234	0.767	12.501	1.36416	1.37858	0.061389	1.01057	Z-006142	Emcn	gene		D:\assemblies\Rattus_norvegicus-Rnor_6.0-dbSNP149\Rattus_norvegicus-Rnor_6.0-dbSNP149.genometemplate\sequences\NC_005101_chr2.gbk#0	266435125	NC_005101.4	+	81171	242634319..242715489	295490, 1303218		Emcn
Adh6a	0.001	0.007	0.097	0.001	7.81879	7.81879	102.669	1	Z-006163	Adh6a	gene		D:\assemblies\Rattus_norvegicus-Rnor_6.0-dbSNP149\Rattus_norvegicus-Rnor_6.0-dbSNP149.genometemplate\sequences\NC_005101_chr2.gbk#0	266435125	NC_005101.4	+	22272	243577086..243599357	295498, 1310029		Adh6a
LOC310902	0.001	0.001	0.165	0.001	1	1	174.871	1	Z-006165	LOC310902	gene		D:\assemblies\Rattus_norvegicus-Rnor_6.0-dbSNP149\Rattus_norvegicus-Rnor_6.0-dbSNP149.genometemplate\sequences\NC_005101_chr2.gbk#0	266435125	NC_005101.4	+	19120	243615544..243634663	310902, 1595864		LOC310902
LOC102549290	0.005	0.01	0.001	0.185	1.97713	0.0567974	0.00511319	0.0287272	Z-006176	LOC102549290	gene		D:\assemblies\Rattus_norvegicus-Rnor_6.0-dbSNP149\Rattus_norvegicus-Rnor_6.0-dbSNP149.genometemplate\sequences\NC_005101_chr2.gbk#0	266435125	NC_005101.4	-	22334	244057788..244035455	102549290, 7539892		LOC102549290
Gbp3	0.03	0.005	0.056	0.001	0.165303	5.16061	59.0406	31.2191	Z-006192	Gbp3	gene		D:\assemblies\Rattus_norvegicus-Rnor_6.0-dbSNP149\Rattus_norvegicus-Rnor_6.0-dbSNP149.genometemplate\sequences\NC_005101_chr2.gbk#0	266435125	NC_005101.4	-	40351	248491258..248450908	685116, 1597766		Gbp3
Clca4	0.001	0.001	0.134	0.001	1	1	141.437	1	Z-006219	Clca4	gene		D:\assemblies\Rattus_norvegicus-Rnor_6.0-dbSNP149\Rattus_norvegicus-Rnor_6.0-dbSNP149.genometemplate\sequences\NC_005101_chr2.gbk#0	266435125	NC_005101.4	-	21122	250864060..250842939	362053, 1303234		Clca4	Clca6, Prp3
Wdr63	0.001	0.003	0.069	0.001	3.60194	3.60194	72.9577	1	Z-006239	Wdr63	gene		D:\assemblies\Rattus_norvegicus-Rnor_6.0-dbSNP149\Rattus_norvegicus-Rnor_6.0-dbSNP149.genometemplate\sequences\NC_005101_chr2.gbk#0	266435125	NC_005101.4	-	58268	251970699..251912432	292165, 1563105		Wdr63	RGD1563105
Mcoln3	0.001	0.005	0.152	0.001	5.76372	5.76372	161.144	1	Z-006240	Mcoln3	gene		D:\assemblies\Rattus_norvegicus-Rnor_6.0-dbSNP149\Rattus_norvegicus-Rnor_6.0-dbSNP149.genometemplate\sequences\NC_005101_chr2.gbk#0	266435125	NC_005101.4	+	77191	251930532..252007722	308022, 1308420		Mcoln3
Mcoln2	0.001	0.001	1.147	0.001	1	1	1213.81	1	Z-006241	Mcoln2	gene		D:\assemblies\Rattus_norvegicus-Rnor_6.0-dbSNP149\Rattus_norvegicus-Rnor_6.0-dbSNP149.genometemplate\sequences\NC_005101_chr2.gbk#0	266435125	NC_005101.4	+	49616	252018594..252068209	292168, 1308884		Mcoln2
LOC56764	1.3	0.06	0.001	0.286	0.0464748	0.211184	0.00330355	4.54406	Z-006251	LOC56764	gene		D:\assemblies\Rattus_norvegicus-Rnor_6.0-dbSNP149\Rattus_norvegicus-Rnor_6.0-dbSNP149.genometemplate\sequences\NC_005101_chr2.gbk#0	266435125	NC_005101.4	-	37348	252537490..252500143	56764, 708544		LOC56764	Djl, rDJL
LOC102550419	0.005	0.005	0.001	0.147	1.10042	0.0368341	0.00643121	0.0334729	Z-006265	LOC102550419	gene		D:\assemblies\Rattus_norvegicus-Rnor_6.0-dbSNP149\Rattus_norvegicus-Rnor_6.0-dbSNP149.genometemplate\sequences\NC_005101_chr2.gbk#0	266435125	NC_005101.4	+	829	254596674..254597502	102550419, 7614361		LOC102550419
LOC102547779	0.005	0.005	0.001	0.147	1.10042	0.0368341	0.00643121	0.0334729	Z-006266	LOC102547779	gene		D:\assemblies\Rattus_norvegicus-Rnor_6.0-dbSNP149\Rattus_norvegicus-Rnor_6.0-dbSNP149.genometemplate\sequences\NC_005101_chr2.gbk#0	266435125	NC_005101.4	+	829	254607997..254608825	102547779, 7563133		LOC102547779
LOC108350145	0.456	1.875	0.001	1.116	4.11357	1.68041	0.000847253	0.408505	Z-006294	LOC108350145	gene		D:\assemblies\Rattus_norvegicus-Rnor_6.0-dbSNP149\Rattus_norvegicus-Rnor_6.0-dbSNP149.genometemplate\sequences\NC_005101_chr2.gbk#0	266435125	NC_005101.4	-	7193	258235806..258228614	108350145		LOC108350145
LOC102553411	0.044	0.048	0.001	0.442	1.09945	0.109545	0.00214016	0.0996365	Z-006301	LOC102553411	gene		D:\assemblies\Rattus_norvegicus-Rnor_6.0-dbSNP149\Rattus_norvegicus-Rnor_6.0-dbSNP149.genometemplate\sequences\NC_005101_chr2.gbk#0	266435125	NC_005101.4	-	7544	260004741..259997198	102553411, 7701132		LOC102553411
LOC102553583	0.001	0.084	0.045	0.001	88.4164	88.4164	47.9986	1	Z-006308	LOC102553583	gene		D:\assemblies\Rattus_norvegicus-Rnor_6.0-dbSNP149\Rattus_norvegicus-Rnor_6.0-dbSNP149.genometemplate\sequences\NC_005101_chr2.gbk#0	266435125	NC_005101.4	-	21031	260337407..260316377	102553583, 7692119		LOC102553583
Lhx8	0.001	0.006	1.174	0.001	6.16369	6.16369	1241.76	1	Z-006309	Lhx8	gene		D:\assemblies\Rattus_norvegicus-Rnor_6.0-dbSNP149\Rattus_norvegicus-Rnor_6.0-dbSNP149.genometemplate\sequences\NC_005101_chr2.gbk#0	266435125	NC_005101.4	-	26540	260598744..260572205	365963, 1308749		Lhx8	Lhx7
Il1rn	10.977	26.475	0.451	8.959	2.41188	2.95516	0.0503103	1.22525	Z-006364	Il1rn	gene		D:\assemblies\Rattus_norvegicus-Rnor_6.0-dbSNP149\Rattus_norvegicus-Rnor_6.0-dbSNP149.genometemplate\sequences\NC_005102_chr3.gbk#0	177699992	NC_005102.4	+	18847	1449778..1468624	60582, 621159		Il1rn	IL-1ra
Dph7	1.689	3.532	18.553	1.445	2.09045	2.44436	12.8404	1.1693	Z-006374	Dph7	gene		D:\assemblies\Rattus_norvegicus-Rnor_6.0-dbSNP149\Rattus_norvegicus-Rnor_6.0-dbSNP149.genometemplate\sequences\NC_005102_chr3.gbk#0	177699992	NC_005102.4	+	8909	2170193..2179101	296550, 1304868		Dph7
Noxa1	0.001	0.001	1.646	0.001	1	1	1741.37	1	Z-006379	Noxa1	gene		D:\assemblies\Rattus_norvegicus-Rnor_6.0-dbSNP149\Rattus_norvegicus-Rnor_6.0-dbSNP149.genometemplate\sequences\NC_005102_chr3.gbk#0	177699992	NC_005102.4	-	9816	2309491..2299676	311793, 1306687		Noxa1
LOC108350588	0.007	0.111	1.809	0.001	15.3579	117.884	1914.11	7.67575	Z-006382	LOC108350588	gene		D:\assemblies\Rattus_norvegicus-Rnor_6.0-dbSNP149\Rattus_norvegicus-Rnor_6.0-dbSNP149.genometemplate\sequences\NC_005102_chr3.gbk#0	177699992	NC_005102.4	+	1107	2404852..2405958	108350588		LOC108350588
Cysrt1	0.001	0.001	0.535	0.001	1	1	565.63	1	Z-006390	Cysrt1	gene		D:\assemblies\Rattus_norvegicus-Rnor_6.0-dbSNP149\Rattus_norvegicus-Rnor_6.0-dbSNP149.genometemplate\sequences\NC_005102_chr3.gbk#0	177699992	NC_005102.4	-	3743	2462037..2458295	499747, 1560880		Cysrt1	RGD1560880
LOC103691747	0.001	0.001	0.787	0.001	1	1	832.953	1	Z-006401	LOC103691747	gene		D:\assemblies\Rattus_norvegicus-Rnor_6.0-dbSNP149\Rattus_norvegicus-Rnor_6.0-dbSNP149.genometemplate\sequences\NC_005102_chr3.gbk#0	177699992	NC_005102.4	+	1569	2559500..2561068	103691747, 9354780		LOC103691747
Lcn12	0.001	0.001	1.831	0.001	1	1	1937.29	1	Z-006414	Lcn12	gene		D:\assemblies\Rattus_norvegicus-Rnor_6.0-dbSNP149\Rattus_norvegicus-Rnor_6.0-dbSNP149.genometemplate\sequences\NC_005102_chr3.gbk#0	177699992	NC_005102.4	-	2589	2719135..2716547	680602, 1589474		Lcn12
Ubac1	34.679	70.943	3.67	43.845	2.04571	1.61804	0.0837036	0.790942	Z-006451	Ubac1	gene		D:\assemblies\Rattus_norvegicus-Rnor_6.0-dbSNP149\Rattus_norvegicus-Rnor_6.0-dbSNP149.genometemplate\sequences\NC_005102_chr3.gbk#0	177699992	NC_005102.4	-	22847	3476242..3453396	362087, 1359542		Ubac1	Ubadc1
Ptges	0.001	0.001	0.454	0.001	1	1	480.759	1	Z-006601	Ptges	gene		D:\assemblies\Rattus_norvegicus-Rnor_6.0-dbSNP149\Rattus_norvegicus-Rnor_6.0-dbSNP149.genometemplate\sequences\NC_005102_chr3.gbk#0	177699992	NC_005102.4	-	11345	9738752..9727408	59103, 62076		Ptges	Pges
LOC102555629	0.001	0.04	0.18	0.001	41.8266	41.8266	190.378	1	Z-006623	LOC102555629	gene		D:\assemblies\Rattus_norvegicus-Rnor_6.0-dbSNP149\Rattus_norvegicus-Rnor_6.0-dbSNP149.genometemplate\sequences\NC_005102_chr3.gbk#0	177699992	NC_005102.4	-	6543	11082555..11076013	102555629, 7511011		LOC102555629
Lhx6	0.07	0.009	0.001	0.3	0.12659	0.0293548	0.00315005	0.231889	Z-006712	Lhx6	gene		D:\assemblies\Rattus_norvegicus-Rnor_6.0-dbSNP149\Rattus_norvegicus-Rnor_6.0-dbSNP149.genometemplate\sequences\NC_005102_chr3.gbk#0	177699992	NC_005102.4	-	24156	15433504..15409349	311901, 1306174		Lhx6
LOC502842	0.001	0.001	1.574	0.001	1	1	1665	1	Z-006733	LOC502842	gene		D:\assemblies\Rattus_norvegicus-Rnor_6.0-dbSNP149\Rattus_norvegicus-Rnor_6.0-dbSNP149.genometemplate\sequences\NC_005102_chr3.gbk#0	177699992	NC_005102.4	-	661	16441055..16440395	502842		LOC502842
LOC100360848	0.001	0.001	3.168	0.001	1	1	3351.52	1	Z-006738	LOC100360848	gene		D:\assemblies\Rattus_norvegicus-Rnor_6.0-dbSNP149\Rattus_norvegicus-Rnor_6.0-dbSNP149.genometemplate\sequences\NC_005102_chr3.gbk#0	177699992	NC_005102.4	+	620	16571590..16572209	100360848, 2321310		LOC100360848
LOC690917	0.095	0.008	1.648	0.001	0.089225	8.9874	1743.22	100.727	Z-006739	LOC690917	gene		D:\assemblies\Rattus_norvegicus-Rnor_6.0-dbSNP149\Rattus_norvegicus-Rnor_6.0-dbSNP149.genometemplate\sequences\NC_005102_chr3.gbk#0	177699992	NC_005102.4	+	774	16590139..16590912	690917		LOC690917
LOC102554660	0.292	0.009	1.157	0.001	0.0312547	9.6492	1223.88	308.728	Z-006770	LOC102554660	gene		D:\assemblies\Rattus_norvegicus-Rnor_6.0-dbSNP149\Rattus_norvegicus-Rnor_6.0-dbSNP149.genometemplate\sequences\NC_005102_chr3.gbk#0	177699992	NC_005102.4	+	728	18060465..18061192	102554660		LOC102554660
RGD1565546	0.008	0.017	1.83	0.001	2.17612	17.5162	1936.65	8.04931	Z-006774	RGD1565546	gene		D:\assemblies\Rattus_norvegicus-Rnor_6.0-dbSNP149\Rattus_norvegicus-Rnor_6.0-dbSNP149.genometemplate\sequences\NC_005102_chr3.gbk#0	177699992	NC_005102.4	+	544	18315103..18315646	500182, 1565546		RGD1565546
LOC102555397	0.292	0.009	1.157	0.001	0.0312547	9.6492	1223.88	308.728	Z-006776	LOC102555397	gene		D:\assemblies\Rattus_norvegicus-Rnor_6.0-dbSNP149\Rattus_norvegicus-Rnor_6.0-dbSNP149.genometemplate\sequences\NC_005102_chr3.gbk#0	177699992	NC_005102.4	+	728	18501895..18502622	102555397		LOC102555397
LOC690527	0.006	0.073	2.175	0.001	11.8919	76.8089	2301.3	6.45896	Z-006784	LOC690527	gene		D:\assemblies\Rattus_norvegicus-Rnor_6.0-dbSNP149\Rattus_norvegicus-Rnor_6.0-dbSNP149.genometemplate\sequences\NC_005102_chr3.gbk#0	177699992	NC_005102.4	+	730	18787170..18787899	690527		LOC690527
RGD1563500	0.001	0.001	0.206	0.001	1	1	217.641	1	Z-006793	RGD1563500	gene		D:\assemblies\Rattus_norvegicus-Rnor_6.0-dbSNP149\Rattus_norvegicus-Rnor_6.0-dbSNP149.genometemplate\sequences\NC_005102_chr3.gbk#0	177699992	NC_005102.4	+	566	19189945..19190510	502810, 1563500		RGD1563500
LOC690275	0.008	0.001	7.005	0.001	0.125882	1	7411.27	7.94394	Z-006818	LOC690275	gene		D:\assemblies\Rattus_norvegicus-Rnor_6.0-dbSNP149\Rattus_norvegicus-Rnor_6.0-dbSNP149.genometemplate\sequences\NC_005102_chr3.gbk#0	177699992	NC_005102.4	-	559	20480231..20479673	690275		LOC690275
LOC102552133	0.006	0.131	1.42	0.001	23.0701	138.328	1502.55	5.99596	Z-006821	LOC102552133	gene		D:\assemblies\Rattus_norvegicus-Rnor_6.0-dbSNP149\Rattus_norvegicus-Rnor_6.0-dbSNP149.genometemplate\sequences\NC_005102_chr3.gbk#0	177699992	NC_005102.4	+	904	20561832..20562735	102552133		LOC102552133
Rpl35	625.281	1419.68	13629.4	767.307	2.27046	1.85021	17.7627	0.814903	Z-006875	Rpl35	gene		D:\assemblies\Rattus_norvegicus-Rnor_6.0-dbSNP149\Rattus_norvegicus-Rnor_6.0-dbSNP149.genometemplate\sequences\NC_005102_chr3.gbk#0	177699992	NC_005102.4	-	2962	23297774..23294813	296709, 1303007		Rpl35
Rnd3	3.333	0.249	0.18	4.657	0.0746798	0.0534412	0.038632	0.715605	Z-006926	Rnd3	gene		D:\assemblies\Rattus_norvegicus-Rnor_6.0-dbSNP149\Rattus_norvegicus-Rnor_6.0-dbSNP149.genometemplate\sequences\NC_005102_chr3.gbk#0	177699992	NC_005102.4	-	17354	36660727..36643374	295588, 1359690		Rnd3	Arhe, RHOE
LOC108350373	0.001	0.001	0.266	0.001	1	1	281.613	1	Z-006940	LOC108350373	gene		D:\assemblies\Rattus_norvegicus-Rnor_6.0-dbSNP149\Rattus_norvegicus-Rnor_6.0-dbSNP149.genometemplate\sequences\NC_005102_chr3.gbk#0	177699992	NC_005102.4	-	14792	39372197..39357406	108350373		LOC108350373
Rprm	0.001	0.009	0.364	0.001	9.21847	9.21847	385.233	1	Z-006941	Rprm	gene		D:\assemblies\Rattus_norvegicus-Rnor_6.0-dbSNP149\Rattus_norvegicus-Rnor_6.0-dbSNP149.genometemplate\sequences\NC_005102_chr3.gbk#0	177699992	NC_005102.4	-	1418	39596718..39595301	680110, 1595512		Rprm
LOC102556145	0.116	0.125	0.001	0.795	1.07872	0.157113	0.00118832	0.145647	Z-006974	LOC102556145	gene		D:\assemblies\Rattus_norvegicus-Rnor_6.0-dbSNP149\Rattus_norvegicus-Rnor_6.0-dbSNP149.genometemplate\sequences\NC_005102_chr3.gbk#0	177699992	NC_005102.4	+	4148	44788083..44792230	102556145, 7671946		LOC102556145
Klhl41	0.033	0.008	0.001	0.14	0.250501	0.05994	0.00675524	0.239281	Z-007052	Klhl41	gene		D:\assemblies\Rattus_norvegicus-Rnor_6.0-dbSNP149\Rattus_norvegicus-Rnor_6.0-dbSNP149.genometemplate\sequences\NC_005102_chr3.gbk#0	177699992	NC_005102.4	+	13127	55910177..55923303	117537, 620852		Klhl41	Kbtbd10, Krp1, Sarcosin
Fastkd1	0.376	0.111	30.176	1.042	0.295799	0.106607	28.951	0.360404	Z-007053	Fastkd1	gene		D:\assemblies\Rattus_norvegicus-Rnor_6.0-dbSNP149\Rattus_norvegicus-Rnor_6.0-dbSNP149.genometemplate\sequences\NC_005102_chr3.gbk#0	177699992	NC_005102.4	-	25987	55951584..55925598	311112, 1563531		Fastkd1	RGD1563531
LOC103691816	1.448	12.715	0.001	1.88	8.7807	6.76323	0.000502714	0.770237	Z-007087	LOC103691816	gene		D:\assemblies\Rattus_norvegicus-Rnor_6.0-dbSNP149\Rattus_norvegicus-Rnor_6.0-dbSNP149.genometemplate\sequences\NC_005102_chr3.gbk#0	177699992	NC_005102.4	-	4835	58306076..58301242	103691816, 9400923		LOC103691816
LOC102554395	0.001	0.001	0.17	0.001	1	1	180.19	1	Z-007139	LOC102554395	gene		D:\assemblies\Rattus_norvegicus-Rnor_6.0-dbSNP149\Rattus_norvegicus-Rnor_6.0-dbSNP149.genometemplate\sequences\NC_005102_chr3.gbk#0	177699992	NC_005102.4	+	2538	62300743..62303280	102554395, 7733574		LOC102554395
Dfnb59	0.005	0.008	0.162	0.001	1.50883	8.66029	171.822	5.73972	Z-007154	Dfnb59	gene		D:\assemblies\Rattus_norvegicus-Rnor_6.0-dbSNP149\Rattus_norvegicus-Rnor_6.0-dbSNP149.genometemplate\sequences\NC_005102_chr3.gbk#0	177699992	NC_005102.4	+	9778	63508386..63518163	679552, 1587131		Dfnb59
Neurod1	0.001	0.001	0.123	0.001	1	1	130.28	1	Z-007176	Neurod1	gene		D:\assemblies\Rattus_norvegicus-Rnor_6.0-dbSNP149\Rattus_norvegicus-Rnor_6.0-dbSNP149.genometemplate\sequences\NC_005102_chr3.gbk#0	177699992	NC_005102.4	-	3304	66417617..66414314	29458, 3165		Neurod1
LOC108350558	0.001	0.004	0.2	0.001	4.29718	4.29718	212.017	1	Z-007193	LOC108350558	gene		D:\assemblies\Rattus_norvegicus-Rnor_6.0-dbSNP149\Rattus_norvegicus-Rnor_6.0-dbSNP149.genometemplate\sequences\NC_005102_chr3.gbk#0	177699992	NC_005102.4	-	2004	68437926..68435923	108350558		LOC108350558
LOC102548277	0.001	0.972	0.251	0.001	1028.61	1028.61	265.218	1	Z-007198	LOC102548277	gene		D:\assemblies\Rattus_norvegicus-Rnor_6.0-dbSNP149\Rattus_norvegicus-Rnor_6.0-dbSNP149.genometemplate\sequences\NC_005102_chr3.gbk#0	177699992	NC_005102.4	-	20518	71105173..71084656	102548277, 7598318		LOC102548277
Prg3	9.258	22.048	0.001	9.481	2.38155	2.3256	9.96901e-05	0.976507	Z-007227	Prg3	gene		D:\assemblies\Rattus_norvegicus-Rnor_6.0-dbSNP149\Rattus_norvegicus-Rnor_6.0-dbSNP149.genometemplate\sequences\NC_005102_chr3.gbk#0	177699992	NC_005102.4	+	6061	72395194..72401254	295706, 1309904		Prg3
Large2	0.006	0.001	0.516	0.001	0.147589	1	545.503	6.77559	Z-007535	Large2	gene		D:\assemblies\Rattus_norvegicus-Rnor_6.0-dbSNP149\Rattus_norvegicus-Rnor_6.0-dbSNP149.genometemplate\sequences\NC_005102_chr3.gbk#0	177699992	NC_005102.4	-	9438	81285457..81276020	311202, 735214		Large2	Gyltl1b
Syt13	0.001	0.001	0.13	0.001	1	1	137.619	1	Z-007547	Syt13	gene		D:\assemblies\Rattus_norvegicus-Rnor_6.0-dbSNP149\Rattus_norvegicus-Rnor_6.0-dbSNP149.genometemplate\sequences\NC_005102_chr3.gbk#0	177699992	NC_005102.4	+	38168	81814287..81852454	80977, 621877		Syt13
Alx4	0.005	0.009	0.001	0.486	1.70056	0.0180132	0.0019444	0.0105925	Z-007553	Alx4	gene		D:\assemblies\Rattus_norvegicus-Rnor_6.0-dbSNP149\Rattus_norvegicus-Rnor_6.0-dbSNP149.genometemplate\sequences\NC_005102_chr3.gbk#0	177699992	NC_005102.4	+	36573	82548959..82585531	296511, 1310201		Alx4
Rag2	0.281	0.088	0.001	0.696	0.314735	0.127074	0.00135808	0.403749	Z-007574	Rag2	gene		D:\assemblies\Rattus_norvegicus-Rnor_6.0-dbSNP149\Rattus_norvegicus-Rnor_6.0-dbSNP149.genometemplate\sequences\NC_005102_chr3.gbk#0	177699992	NC_005102.4	+	8298	91191837..91200134	295953, 1305588		Rag2
Rag1	0.29	0.041	0.001	0.29	0.143047	0.142815	0.00325711	0.99838	Z-007575	Rag1	gene		D:\assemblies\Rattus_norvegicus-Rnor_6.0-dbSNP149\Rattus_norvegicus-Rnor_6.0-dbSNP149.genometemplate\sequences\NC_005102_chr3.gbk#0	177699992	NC_005102.4	-	11098	91217491..91206394	84600, 619790		Rag1
LOC102548825	0.001	0.001	0.113	0.001	1	1	119.081	1	Z-007592	LOC102548825	gene		D:\assemblies\Rattus_norvegicus-Rnor_6.0-dbSNP149\Rattus_norvegicus-Rnor_6.0-dbSNP149.genometemplate\sequences\NC_005102_chr3.gbk#0	177699992	NC_005102.4	+	11603	93096339..93107941	102548825, 7562021		LOC102548825
Ehf	0.001	0.001	0.521	0.001	1	1	551.593	1	Z-007593	Ehf	gene		D:\assemblies\Rattus_norvegicus-Rnor_6.0-dbSNP149\Rattus_norvegicus-Rnor_6.0-dbSNP149.genometemplate\sequences\NC_005102_chr3.gbk#0	177699992	NC_005102.4	-	40228	93216484..93176257	295965, 1310282		Ehf
Elf5	0.001	0.001	0.642	0.001	1	1	678.84	1	Z-007594	Elf5	gene		D:\assemblies\Rattus_norvegicus-Rnor_6.0-dbSNP149\Rattus_norvegicus-Rnor_6.0-dbSNP149.genometemplate\sequences\NC_005102_chr3.gbk#0	177699992	NC_005102.4	+	40941	93333514..93374454	366142, 1305859		Elf5
LOC102552075	0.001	0.007	0.244	0.001	7.00941	7.00941	258.479	1	Z-007605	LOC102552075	gene		D:\assemblies\Rattus_norvegicus-Rnor_6.0-dbSNP149\Rattus_norvegicus-Rnor_6.0-dbSNP149.genometemplate\sequences\NC_005102_chr3.gbk#0	177699992	NC_005102.4	-	3679	93919991..93916313	102552075, 7525020		LOC102552075
Mpped2	0.725	0.193	0.001	1.065	0.266268	0.181348	0.000887667	0.681072	Z-007636	Mpped2	gene		D:\assemblies\Rattus_norvegicus-Rnor_6.0-dbSNP149\Rattus_norvegicus-Rnor_6.0-dbSNP149.genometemplate\sequences\NC_005102_chr3.gbk#0	177699992	NC_005102.4	+	179428	97720308..97899735	362185, 735060		Mpped2	C11orf8, C11orf8h
Lpcat4	0.04	0.024	11.611	0.361	0.593645	0.0665902	32.1934	0.112172	Z-007708	Lpcat4	gene		D:\assemblies\Rattus_norvegicus-Rnor_6.0-dbSNP149\Rattus_norvegicus-Rnor_6.0-dbSNP149.genometemplate\sequences\NC_005102_chr3.gbk#0	177699992	NC_005102.4	+	8127	103725762..103733888	296048, 1311177		Lpcat4	Agpat7, RGD1311177
LOC102547459	1.236	4.63	0.001	1.289	3.74502	3.59337	0.000733483	0.959505	Z-007758	LOC102547459	gene		D:\assemblies\Rattus_norvegicus-Rnor_6.0-dbSNP149\Rattus_norvegicus-Rnor_6.0-dbSNP149.genometemplate\sequences\NC_005102_chr3.gbk#0	177699992	NC_005102.4	-	11797	109816899..109805103	102547459, 7678100		LOC102547459
Itpka	0.001	0.206	0.164	0.001	218.448	218.448	173.378	1	Z-007803	Itpka	gene		D:\assemblies\Rattus_norvegicus-Rnor_6.0-dbSNP149\Rattus_norvegicus-Rnor_6.0-dbSNP149.genometemplate\sequences\NC_005102_chr3.gbk#0	177699992	NC_005102.4	+	8599	111545007..111553605	81677, 619950		Itpka
Ell3	0.124	0.298	13.432	0.444	2.40602	0.671669	30.2246	0.279162	Z-007851	Ell3	gene		D:\assemblies\Rattus_norvegicus-Rnor_6.0-dbSNP149\Rattus_norvegicus-Rnor_6.0-dbSNP149.genometemplate\sequences\NC_005102_chr3.gbk#0	177699992	NC_005102.4	-	5475	113405869..113400395	296102, 1309917		Ell3
LOC102556085	0.001	0.012	2.232	0.001	12.92	12.92	2361.77	1	Z-007874	LOC102556085	gene		D:\assemblies\Rattus_norvegicus-Rnor_6.0-dbSNP149\Rattus_norvegicus-Rnor_6.0-dbSNP149.genometemplate\sequences\NC_005102_chr3.gbk#0	177699992	NC_005102.4	+	1744	114650471..114652214	102556085, 7516973		LOC102556085
Gatm	12.291	20.221	0.54	13.387	1.64514	1.51047	0.0403244	0.91814	Z-007875	Gatm	gene		D:\assemblies\Rattus_norvegicus-Rnor_6.0-dbSNP149\Rattus_norvegicus-Rnor_6.0-dbSNP149.genometemplate\sequences\NC_005102_chr3.gbk#0	177699992	NC_005102.4	-	16586	114728155..114711570	81660, 71090		Gatm
LOC102556271	0.084	0.077	0.001	0.501	0.909832	0.152777	0.00188615	0.167918	Z-007938	LOC102556271	gene		D:\assemblies\Rattus_norvegicus-Rnor_6.0-dbSNP149\Rattus_norvegicus-Rnor_6.0-dbSNP149.genometemplate\sequences\NC_005102_chr3.gbk#0	177699992	NC_005102.4	+	8076	120105803..120113878	102556271, 7727044		LOC102556271
Mall	0.04	0.006	0.001	0.41	0.160134	0.0154632	0.00230387	0.0965641	Z-007945	Mall	gene		D:\assemblies\Rattus_norvegicus-Rnor_6.0-dbSNP149\Rattus_norvegicus-Rnor_6.0-dbSNP149.genometemplate\sequences\NC_005102_chr3.gbk#0	177699992	NC_005102.4	-	34508	120307090..120272583	362211, 1310869		Mall	RGD1310869
Acoxl	0.001	0.001	0.087	0.001	1	1	92.3575	1	Z-007949	Acoxl	gene		D:\assemblies\Rattus_norvegicus-Rnor_6.0-dbSNP149\Rattus_norvegicus-Rnor_6.0-dbSNP149.genometemplate\sequences\NC_005102_chr3.gbk#0	177699992	NC_005102.4	+	310499	120414311..120724809	296138, 1306814		Acoxl
LOC102549265	0.776	1.646	0.001	1.288	2.12123	1.2777	0.000733689	0.60234	Z-007969	LOC102549265	gene		D:\assemblies\Rattus_norvegicus-Rnor_6.0-dbSNP149\Rattus_norvegicus-Rnor_6.0-dbSNP149.genometemplate\sequences\NC_005102_chr3.gbk#0	177699992	NC_005102.4	+	14720	121746728..121761447	102549265, 7635188		LOC102549265
Tgm6	0.001	0.001	0.057	0.001	1	1	59.9372	1	Z-007987	Tgm6	gene		D:\assemblies\Rattus_norvegicus-Rnor_6.0-dbSNP149\Rattus_norvegicus-Rnor_6.0-dbSNP149.genometemplate\sequences\NC_005102_chr3.gbk#0	177699992	NC_005102.4	+	35872	122644183..122680054	296152, 1565348		Tgm6
Nop56	6.035	15.083	84.62	8.607	2.49907	1.75237	9.83144	0.70121	Z-007990	Nop56	gene		D:\assemblies\Rattus_norvegicus-Rnor_6.0-dbSNP149\Rattus_norvegicus-Rnor_6.0-dbSNP149.genometemplate\sequences\NC_005102_chr3.gbk#0	177699992	NC_005102.4	+	4839	122803726..122808564	362214, 1308892		Nop56	Nol5a
Vps16	2.809	6.23	40.374	3.777	2.21764	1.64931	10.6891	0.743723	Z-007997	Vps16	gene		D:\assemblies\Rattus_norvegicus-Rnor_6.0-dbSNP149\Rattus_norvegicus-Rnor_6.0-dbSNP149.genometemplate\sequences\NC_005102_chr3.gbk#0	177699992	NC_005102.4	+	21657	122947887..122969543	296159, 1359414		Vps16
Cdc25b	24.753	40.811	3.046	30.434	1.64873	1.34096	0.100087	0.813325	Z-008021	Cdc25b	gene		D:\assemblies\Rattus_norvegicus-Rnor_6.0-dbSNP149\Rattus_norvegicus-Rnor_6.0-dbSNP149.genometemplate\sequences\NC_005102_chr3.gbk#0	177699992	NC_005102.4	+	10158	123731539..123741696	171103, 621500		Cdc25b
LOC103691900	0.001	0.001	0.043	0.001	1	1	45.3867	1	Z-008067	LOC103691900	gene		D:\assemblies\Rattus_norvegicus-Rnor_6.0-dbSNP149\Rattus_norvegicus-Rnor_6.0-dbSNP149.genometemplate\sequences\NC_005102_chr3.gbk#0	177699992	NC_005102.4	+	3960	128869926..128873885	103691900, 9324167		LOC103691900
Slc24a3	0.815	0.18	0.143	1.876	0.221145	0.0960887	0.0760674	0.434505	Z-008128	Slc24a3	gene		D:\assemblies\Rattus_norvegicus-Rnor_6.0-dbSNP149\Rattus_norvegicus-Rnor_6.0-dbSNP149.genometemplate\sequences\NC_005102_chr3.gbk#0	177699992	NC_005102.4	+	501787	139333942..139835728	85267, 69256		Slc24a3	Nckx3
LOC102547396	0.001	0.461	0.207	0.001	488.265	488.265	219.54	1	Z-008208	LOC102547396	gene		D:\assemblies\Rattus_norvegicus-Rnor_6.0-dbSNP149\Rattus_norvegicus-Rnor_6.0-dbSNP149.genometemplate\sequences\NC_005102_chr3.gbk#0	177699992	NC_005102.4	+	1944	146488849..146490792	102547396, 7656316		LOC102547396
Srxn1	1.668	5.117	0.001	2.608	3.06682	1.96168	0.000362337	0.639647	Z-008235	Srxn1	gene		D:\assemblies\Rattus_norvegicus-Rnor_6.0-dbSNP149\Rattus_norvegicus-Rnor_6.0-dbSNP149.genometemplate\sequences\NC_005102_chr3.gbk#0	177699992	NC_005102.4	+	5561	147608850..147614410	296271, 1307332		Srxn1	Ab2-390, Npn3
Zcchc3	1.334	2.465	0.271	3.321	1.84762	0.742079	0.0816259	0.40164	Z-008243	Zcchc3	gene		D:\assemblies\Rattus_norvegicus-Rnor_6.0-dbSNP149\Rattus_norvegicus-Rnor_6.0-dbSNP149.genometemplate\sequences\NC_005102_chr3.gbk#0	177699992	NC_005102.4	-	4114	147881434..147877321	690005, 1585203		Zcchc3
Mylk2	3.35	5.064	0.001	3.176	1.51161	1.59471	0.000297628	1.05497	Z-008265	Mylk2	gene		D:\assemblies\Rattus_norvegicus-Rnor_6.0-dbSNP149\Rattus_norvegicus-Rnor_6.0-dbSNP149.genometemplate\sequences\NC_005102_chr3.gbk#0	177699992	NC_005102.4	+	11667	148386185..148397851	117558, 620934		Mylk2	Klmc, Mlck
Bpifb4	0.001	0.007	0.497	0.001	7.11014	7.11014	525.45	1	Z-008294	Bpifb4	gene		D:\assemblies\Rattus_norvegicus-Rnor_6.0-dbSNP149\Rattus_norvegicus-Rnor_6.0-dbSNP149.genometemplate\sequences\NC_005102_chr3.gbk#0	177699992	NC_005102.4	+	24959	149424392..149449350	499925, 1561174		Bpifb4	Lplunc4, RY2G5
LOC102551821	0.001	0.007	0.001	0.249	6.90296	0.0262283	0.00379958	0.00379958	Z-008370	LOC102551821	gene		D:\assemblies\Rattus_norvegicus-Rnor_6.0-dbSNP149\Rattus_norvegicus-Rnor_6.0-dbSNP149.genometemplate\sequences\NC_005102_chr3.gbk#0	177699992	NC_005102.4	-	10338	152886391..152876054	102551821, 7616921		LOC102551821
LOC108350508	0.001	0.005	0.129	0.001	4.92954	4.92954	135.986	1	Z-008387	LOC108350508	gene		D:\assemblies\Rattus_norvegicus-Rnor_6.0-dbSNP149\Rattus_norvegicus-Rnor_6.0-dbSNP149.genometemplate\sequences\NC_005102_chr3.gbk#0	177699992	NC_005102.4	-	4641	153547652..153543012	108350508		LOC108350508
LOC100911299	0.014	0.002	0.4	0.001	0.161991	2.37138	423.322	14.639	Z-008393	LOC100911299	gene		D:\assemblies\Rattus_norvegicus-Rnor_6.0-dbSNP149\Rattus_norvegicus-Rnor_6.0-dbSNP149.genometemplate\sequences\NC_005102_chr3.gbk#0	177699992	NC_005102.4	-	11960	154038058..154026099	100911299, 6494064		LOC100911299
Wisp2	0.114	1.018	0.001	0.798	8.9715	1.27606	0.0011842	0.142235	Z-008483	Wisp2	gene		D:\assemblies\Rattus_norvegicus-Rnor_6.0-dbSNP149\Rattus_norvegicus-Rnor_6.0-dbSNP149.genometemplate\sequences\NC_005102_chr3.gbk#0	177699992	NC_005102.4	+	11348	160207969..160219316	29576, 621867		Wisp2	CCN5
Slpil2	0.065	0.152	17.276	0.511	2.32866	0.297085	33.7883	0.127577	Z-008503	Slpil2	gene		D:\assemblies\Rattus_norvegicus-Rnor_6.0-dbSNP149\Rattus_norvegicus-Rnor_6.0-dbSNP149.genometemplate\sequences\NC_005102_chr3.gbk#0	177699992	NC_005102.4	-	2247	160738923..160736677	408229, 1303102		Slpil2
Slpi	2.244	7.448	151.373	2.259	3.31963	3.29633	66.9955	0.992981	Z-008505	Slpi	gene		D:\assemblies\Rattus_norvegicus-Rnor_6.0-dbSNP149\Rattus_norvegicus-Rnor_6.0-dbSNP149.genometemplate\sequences\NC_005102_chr3.gbk#0	177699992	NC_005102.4	-	2250	160802228..160799979	84386, 621768		Slpi
Rbpjl	0.001	0.005	1.987	0.001	5.5953	5.5953	2102.1	1	Z-008507	Rbpjl	gene		D:\assemblies\Rattus_norvegicus-Rnor_6.0-dbSNP149\Rattus_norvegicus-Rnor_6.0-dbSNP149.genometemplate\sequences\NC_005102_chr3.gbk#0	177699992	NC_005102.4	+	13290	160851836..160865125	362268, 1304786		Rbpjl	Rbpsuhl
Slc12a5	0.004	0.009	0.14	0.001	2.23641	9.55863	148.168	4.27409	Z-008545	Slc12a5	gene		D:\assemblies\Rattus_norvegicus-Rnor_6.0-dbSNP149\Rattus_norvegicus-Rnor_6.0-dbSNP149.genometemplate\sequences\NC_005102_chr3.gbk#0	177699992	NC_005102.4	+	31776	161433303..161465078	171373, 620811		Slc12a5	Kcc2
Slc2a10	0.04	0.051	0.001	0.199	1.27897	0.256645	0.00474333	0.200665	Z-008560	Slc2a10	gene		D:\assemblies\Rattus_norvegicus-Rnor_6.0-dbSNP149\Rattus_norvegicus-Rnor_6.0-dbSNP149.genometemplate\sequences\NC_005102_chr3.gbk#0	177699992	NC_005102.4	+	12455	162182156..162194610	366251, 1306552		Slc2a10
LOC100911177	31.676	92.68	318.719	34.916	2.9259	2.65436	9.12813	0.907195	Z-008579	LOC100911177	gene		D:\assemblies\Rattus_norvegicus-Rnor_6.0-dbSNP149\Rattus_norvegicus-Rnor_6.0-dbSNP149.genometemplate\sequences\NC_005102_chr3.gbk#0	177699992	NC_005102.4	+	2592	163815320..163817911	100911177, 6494811		LOC100911177
LOC685963	84.501	231.42	2821.84	106.003	2.73865	2.18315	26.6205	0.797164	Z-008583	LOC685963	gene		D:\assemblies\Rattus_norvegicus-Rnor_6.0-dbSNP149\Rattus_norvegicus-Rnor_6.0-dbSNP149.genometemplate\sequences\NC_005102_chr3.gbk#0	177699992	NC_005102.4	+	340	164002409..164002748	685963, 1587812		LOC685963
LOC102552784	0.002	0.004	0.097	0.001	1.60029	3.94046	102.306	2.46234	Z-008649	LOC102552784	gene		D:\assemblies\Rattus_norvegicus-Rnor_6.0-dbSNP149\Rattus_norvegicus-Rnor_6.0-dbSNP149.genometemplate\sequences\NC_005102_chr3.gbk#0	177699992	NC_005102.4	-	5711	168491904..168486194	102552784, 7497111		LOC102552784
Cass4	0.976	2.067	0.069	1.267	2.11783	1.63148	0.0542583	0.770354	Z-008664	Cass4	gene		D:\assemblies\Rattus_norvegicus-Rnor_6.0-dbSNP149\Rattus_norvegicus-Rnor_6.0-dbSNP149.genometemplate\sequences\NC_005102_chr3.gbk#0	177699992	NC_005102.4	+	39886	170398496..170438381	296409, 1310643		Cass4	RGD1310643
Spo11	0.001	0.001	2.185	0.001	1	1	2312.33	1	Z-008673	Spo11	gene		D:\assemblies\Rattus_norvegicus-Rnor_6.0-dbSNP149\Rattus_norvegicus-Rnor_6.0-dbSNP149.genometemplate\sequences\NC_005102_chr3.gbk#0	177699992	NC_005102.4	+	16654	170991573..171008226	366261, 1306454		Spo11
LOC103691993	0.008	0.001	0.499	0.001	0.125579	1	527.579	7.96311	Z-008741	LOC103691993	gene		D:\assemblies\Rattus_norvegicus-Rnor_6.0-dbSNP149\Rattus_norvegicus-Rnor_6.0-dbSNP149.genometemplate\sequences\NC_005102_chr3.gbk#0	177699992	NC_005102.4	+	2764	175645057..175647820	103691993, 9285524		LOC103691993
LOC108350541	0.001	0.008	5.117	0.001	8.05733	8.05733	5414.53	1	Z-008777	LOC108350541	gene		D:\assemblies\Rattus_norvegicus-Rnor_6.0-dbSNP149\Rattus_norvegicus-Rnor_6.0-dbSNP149.genometemplate\sequences\NC_005102_chr3.gbk#0	177699992	NC_005102.4	+	4260	176715981..176720240	108350541		LOC108350541
Lime1	0.275	0.439	19.172	0.339	1.59875	1.29616	56.5851	0.810738	Z-008785	Lime1	gene		D:\assemblies\Rattus_norvegicus-Rnor_6.0-dbSNP149\Rattus_norvegicus-Rnor_6.0-dbSNP149.genometemplate\sequences\NC_005102_chr3.gbk#0	177699992	NC_005102.4	+	6350	176881881..176888230	362289, 1562795		Lime1	RGD1562795
LOC102546975	0.001	0.001	0.05	0.001	1	1	53.1264	1	Z-008826	LOC102546975	gene		D:\assemblies\Rattus_norvegicus-Rnor_6.0-dbSNP149\Rattus_norvegicus-Rnor_6.0-dbSNP149.genometemplate\sequences\NC_005103_chr4.gbk#0	184226339	NC_005103.4	+	8070	727831..735900	102546975, 7585075		LOC102546975
LOC108350643	0.01	0.001	0.408	0.001	0.0976122	1	431.407	10.2446	Z-008873	LOC108350643	gene		D:\assemblies\Rattus_norvegicus-Rnor_6.0-dbSNP149\Rattus_norvegicus-Rnor_6.0-dbSNP149.genometemplate\sequences\NC_005103_chr4.gbk#0	184226339	NC_005103.4	+	1254	4005884..4007137	108350643		LOC108350643
LOC100910079	0.111	0.151	0.001	0.424	1.35574	0.356243	0.00222885	0.262766	Z-008879	LOC100910079	gene		D:\assemblies\Rattus_norvegicus-Rnor_6.0-dbSNP149\Rattus_norvegicus-Rnor_6.0-dbSNP149.genometemplate\sequences\NC_005103_chr4.gbk#0	184226339	NC_005103.4	-	51784	5773357..5721574	100910079, 6500542		LOC100910079
Hepacam2	0.001	0.087	0.664	0.001	91.6221	91.6221	702.978	1	Z-009056	Hepacam2	gene		D:\assemblies\Rattus_norvegicus-Rnor_6.0-dbSNP149\Rattus_norvegicus-Rnor_6.0-dbSNP149.genometemplate\sequences\NC_005103_chr4.gbk#0	184226339	NC_005103.4	-	34861	28437722..28402862	296846, 1305697		Hepacam2	RGD1305697
Peg10	0.001	0.031	0.001	0.186	32.8499	0.167231	0.00509076	0.00509076	Z-009073	Peg10	gene		D:\assemblies\Rattus_norvegicus-Rnor_6.0-dbSNP149\Rattus_norvegicus-Rnor_6.0-dbSNP149.genometemplate\sequences\NC_005103_chr4.gbk#0	184226339	NC_005103.4	+	8994	29795524..29804517	102553587, 1595574		Peg10
Dync1i1	0.177	0.477	0.001	0.109	2.695	4.38223	0.00867407	1.62606	Z-009082	Dync1i1	gene		D:\assemblies\Rattus_norvegicus-Rnor_6.0-dbSNP149\Rattus_norvegicus-Rnor_6.0-dbSNP149.genometemplate\sequences\NC_005103_chr4.gbk#0	184226339	NC_005103.4	+	313343	30807755..31121097	29564, 2512		Dync1i1	Dnci1, Dncic1
Samd9l	1.248	2.107	20.762	1.525	1.68877	1.38161	13.6139	0.818113	Z-009085	Samd9l	gene		D:\assemblies\Rattus_norvegicus-Rnor_6.0-dbSNP149\Rattus_norvegicus-Rnor_6.0-dbSNP149.genometemplate\sequences\NC_005103_chr4.gbk#0	184226339	NC_005103.4	+	4269	31295156..31299424	500015, 1562531		Samd9l
Dlx6	0.658	1.332	0.001	1.699	2.02489	0.783949	0.000556338	0.387155	Z-009093	Dlx6	gene		D:\assemblies\Rattus_norvegicus-Rnor_6.0-dbSNP149\Rattus_norvegicus-Rnor_6.0-dbSNP149.genometemplate\sequences\NC_005103_chr4.gbk#0	184226339	NC_005103.4	+	4293	32373096..32377388	500023, 1561539		Dlx6
LOC500035	0.062	0.012	0.875	0.001	0.200591	13.1064	925.545	65.3392	Z-009127	LOC500035	gene		D:\assemblies\Rattus_norvegicus-Rnor_6.0-dbSNP149\Rattus_norvegicus-Rnor_6.0-dbSNP149.genometemplate\sequences\NC_005103_chr4.gbk#0	184226339	NC_005103.4	+	8280	40161285..40169564	500035, 1564656		LOC500035
LOC102551271	0.012	0.005	0.117	0.001	0.38415	4.85359	123.769	12.6346	Z-009147	LOC102551271	gene		D:\assemblies\Rattus_norvegicus-Rnor_6.0-dbSNP149\Rattus_norvegicus-Rnor_6.0-dbSNP149.genometemplate\sequences\NC_005103_chr4.gbk#0	184226339	NC_005103.4	-	27902	44936075..44908174	102551271, 7696844		LOC102551271
Asb15	0.049	0.575	0.001	0.259	11.6814	2.2185	0.00364611	0.189917	Z-009181	Asb15	gene		D:\assemblies\Rattus_norvegicus-Rnor_6.0-dbSNP149\Rattus_norvegicus-Rnor_6.0-dbSNP149.genometemplate\sequences\NC_005103_chr4.gbk#0	184226339	NC_005103.4	+	43462	51598815..51642276	500050, 727860		Asb15
Grm8	0.001	0.001	0.038	0.001	1	1	40.7244	1	Z-009193	Grm8	gene		D:\assemblies\Rattus_norvegicus-Rnor_6.0-dbSNP149\Rattus_norvegicus-Rnor_6.0-dbSNP149.genometemplate\sequences\NC_005103_chr4.gbk#0	184226339	NC_005103.4	-	935183	55409526..54474344	60590, 619858		Grm8	Glur8, Gprc1h, mGlur, Mglur8, mGluR8b
Lipogenin	0.001	0.008	0.7	0.001	8.69693	8.69693	740.579	1	Z-009201	Lipogenin	gene		D:\assemblies\Rattus_norvegicus-Rnor_6.0-dbSNP149\Rattus_norvegicus-Rnor_6.0-dbSNP149.genometemplate\sequences\NC_005103_chr4.gbk#0	184226339	NC_005103.4	+	1256	56033448..56034703	252964, 628724		Lipogenin
Fam71f2	0.293	1.955	0.001	0.342	6.66993	5.72344	0.00276692	0.858095	Z-009211	Fam71f2	gene		D:\assemblies\Rattus_norvegicus-Rnor_6.0-dbSNP149\Rattus_norvegicus-Rnor_6.0-dbSNP149.genometemplate\sequences\NC_005103_chr4.gbk#0	184226339	NC_005103.4	+	10806	56556545..56567350	500060, 1561814		Fam71f2	Tdrns18l2
LOC103692085	2.128	4.294	0.001	1.427	2.01815	3.00983	0.00066245	1.49138	Z-009212	LOC103692085	gene		D:\assemblies\Rattus_norvegicus-Rnor_6.0-dbSNP149\Rattus_norvegicus-Rnor_6.0-dbSNP149.genometemplate\sequences\NC_005103_chr4.gbk#0	184226339	NC_005103.4	-	440	56563102..56562663	103692085, 9389926		LOC103692085
Tspan33	5.21	16.651	0.615	7.305	3.1962	2.27953	0.0842241	0.7132	Z-009224	Tspan33	gene		D:\assemblies\Rattus_norvegicus-Rnor_6.0-dbSNP149\Rattus_norvegicus-Rnor_6.0-dbSNP149.genometemplate\sequences\NC_005103_chr4.gbk#0	184226339	NC_005103.4	+	24584	56981283..57005866	500065, 1560915		Tspan33	RGD1560915
LOC102553416	0.031	0.007	0.001	0.16	0.223816	0.0427176	0.00591274	0.19086	Z-009245	LOC102553416	gene		D:\assemblies\Rattus_norvegicus-Rnor_6.0-dbSNP149\Rattus_norvegicus-Rnor_6.0-dbSNP149.genometemplate\sequences\NC_005103_chr4.gbk#0	184226339	NC_005103.4	-	12438	57925235..57912798	102553416, 7689603		LOC102553416
Mest	2.932	3.045	0.191	2.344	1.03828	1.29884	0.0812814	1.25095	Z-009249	Mest	gene		D:\assemblies\Rattus_norvegicus-Rnor_6.0-dbSNP149\Rattus_norvegicus-Rnor_6.0-dbSNP149.genometemplate\sequences\NC_005103_chr4.gbk#0	184226339	NC_005103.4	+	10442	58052786..58063227	58827, 1594589		Mest
LOC103692111	0.007	0.001	0.247	0.001	0.144941	1	261.739	6.89935	Z-009258	LOC103692111	gene		D:\assemblies\Rattus_norvegicus-Rnor_6.0-dbSNP149\Rattus_norvegicus-Rnor_6.0-dbSNP149.genometemplate\sequences\NC_005103_chr4.gbk#0	184226339	NC_005103.4	-	34625	58504056..58469432	103692111, 9408229		LOC103692111
Dennd2a	2.075	4.233	0.321	3.35	2.03999	1.26382	0.0958445	0.619523	Z-009336	Dennd2a	gene		D:\assemblies\Rattus_norvegicus-Rnor_6.0-dbSNP149\Rattus_norvegicus-Rnor_6.0-dbSNP149.genometemplate\sequences\NC_005103_chr4.gbk#0	184226339	NC_005103.4	-	100737	67342993..67242257	312257, 1306142		Dennd2a
LOC102554668	0.008	1.009	3.04	0.221	132.985	4.5647	13.7504	0.034325	Z-009338	LOC102554668	gene		D:\assemblies\Rattus_norvegicus-Rnor_6.0-dbSNP149\Rattus_norvegicus-Rnor_6.0-dbSNP149.genometemplate\sequences\NC_005103_chr4.gbk#0	184226339	NC_005103.4	-	1229	67378101..67376873	102554668, 7626918		LOC102554668
LOC108350697	0.001	0.001	0.566	0.001	1	1	598.684	1	Z-009350	LOC108350697	gene		D:\assemblies\Rattus_norvegicus-Rnor_6.0-dbSNP149\Rattus_norvegicus-Rnor_6.0-dbSNP149.genometemplate\sequences\NC_005103_chr4.gbk#0	184226339	NC_005103.4	+	3332	68578432..68581763	108350697		LOC108350697
Ssbp1	6.57	6.208	69.701	7.947	0.944872	0.781188	8.77106	0.826767	Z-009352	Ssbp1	gene		D:\assemblies\Rattus_norvegicus-Rnor_6.0-dbSNP149\Rattus_norvegicus-Rnor_6.0-dbSNP149.genometemplate\sequences\NC_005103_chr4.gbk#0	184226339	NC_005103.4	+	10269	68634844..68645112	54304, 3760		Ssbp1	Mt-SSB, mtSSB, Ssbp
Clec5a	1.998	5.838	0.001	1.392	2.92127	4.19459	0.000679097	1.43588	Z-009356	Clec5a	gene		D:\assemblies\Rattus_norvegicus-Rnor_6.0-dbSNP149\Rattus_norvegicus-Rnor_6.0-dbSNP149.genometemplate\sequences\NC_005103_chr4.gbk#0	184226339	NC_005103.4	-	9592	68819921..68810330	679787, 1584755		Clec5a
LOC102550783	0.001	0.001	2.954	0.001	1	1	3125.44	1	Z-009361	LOC102550783	gene		D:\assemblies\Rattus_norvegicus-Rnor_6.0-dbSNP149\Rattus_norvegicus-Rnor_6.0-dbSNP149.genometemplate\sequences\NC_005103_chr4.gbk#0	184226339	NC_005103.4	+	1134	69138276..69139409	102550783		LOC102550783
Tryx5	0.001	0.001	0.272	0.001	1	1	288.117	1	Z-009363	Tryx5	gene		D:\assemblies\Rattus_norvegicus-Rnor_6.0-dbSNP149\Rattus_norvegicus-Rnor_6.0-dbSNP149.genometemplate\sequences\NC_005103_chr4.gbk#0	184226339	NC_005103.4	-	8638	69164906..69156269	408205, 1302947		Tryx5
LOC312273	0.001	0.001	2.364	0.001	1	1	2501.53	1	Z-009364	LOC312273	gene		D:\assemblies\Rattus_norvegicus-Rnor_6.0-dbSNP149\Rattus_norvegicus-Rnor_6.0-dbSNP149.genometemplate\sequences\NC_005103_chr4.gbk#0	184226339	NC_005103.4	-	5946	69196430..69190485	312273, 1563848		LOC312273	Tryx4
LOC100910843	0.001	0.006	0.137	0.001	6.60644	6.60644	145.213	1	Z-009366	LOC100910843	gene		D:\assemblies\Rattus_norvegicus-Rnor_6.0-dbSNP149\Rattus_norvegicus-Rnor_6.0-dbSNP149.genometemplate\sequences\NC_005103_chr4.gbk#0	184226339	NC_005103.4	+	2271	69249070..69251340	100910843, 6496223		LOC100910843
Prss3	0.001	0.001	1.29	0.001	1	1	1365.17	1	Z-009367	Prss3	gene		D:\assemblies\Rattus_norvegicus-Rnor_6.0-dbSNP149\Rattus_norvegicus-Rnor_6.0-dbSNP149.genometemplate\sequences\NC_005103_chr4.gbk#0	184226339	NC_005103.4	-	3709	69268336..69264628	286911, 708437		Prss3	Try3
LOC102550134	0.001	0.001	3.851	0.001	1	1	4074.5	1	Z-009368	LOC102550134	gene		D:\assemblies\Rattus_norvegicus-Rnor_6.0-dbSNP149\Rattus_norvegicus-Rnor_6.0-dbSNP149.genometemplate\sequences\NC_005103_chr4.gbk#0	184226339	NC_005103.4	+	2122	69285320..69287441	102550134		LOC102550134
LOC100911086	0.001	0.006	2.583	0.001	6.4047	6.4047	2732.75	1	Z-009370	LOC100911086	gene		D:\assemblies\Rattus_norvegicus-Rnor_6.0-dbSNP149\Rattus_norvegicus-Rnor_6.0-dbSNP149.genometemplate\sequences\NC_005103_chr4.gbk#0	184226339	NC_005103.4	+	9151	69383223..69392373	100911086, 6494965		LOC100911086
LOC108350806	0.001	0.001	7.953	0.001	1	1	8414.9	1	Z-009371	LOC108350806	gene		D:\assemblies\Rattus_norvegicus-Rnor_6.0-dbSNP149\Rattus_norvegicus-Rnor_6.0-dbSNP149.genometemplate\sequences\NC_005103_chr4.gbk#0	184226339	NC_005103.4	+	390	69403845..69404234	108350806		LOC108350806
LOC102547329	0.001	0.001	1.937	0.001	1	1	2049.32	1	Z-009372	LOC102547329	gene		D:\assemblies\Rattus_norvegicus-Rnor_6.0-dbSNP149\Rattus_norvegicus-Rnor_6.0-dbSNP149.genometemplate\sequences\NC_005103_chr4.gbk#0	184226339	NC_005103.4	+	4415	69417070..69421484	102547329		LOC102547329
LOC100911317	0.001	0.007	0.971	0.001	7.76576	7.76576	1026.95	1	Z-009376	LOC100911317	gene		D:\assemblies\Rattus_norvegicus-Rnor_6.0-dbSNP149\Rattus_norvegicus-Rnor_6.0-dbSNP149.genometemplate\sequences\NC_005103_chr4.gbk#0	184226339	NC_005103.4	+	775	69444126..69444900	100911317, 6493361		LOC100911317
LOC102551370	0.001	0.001	2.581	0.001	1	1	2731.16	1	Z-009377	LOC102551370	gene		D:\assemblies\Rattus_norvegicus-Rnor_6.0-dbSNP149\Rattus_norvegicus-Rnor_6.0-dbSNP149.genometemplate\sequences\NC_005103_chr4.gbk#0	184226339	NC_005103.4	+	1134	69456816..69457949	102551370		LOC102551370
LOC103692104	0.001	0.001	1.153	0.001	1	1	1219.44	1	Z-009378	LOC103692104	gene		D:\assemblies\Rattus_norvegicus-Rnor_6.0-dbSNP149\Rattus_norvegicus-Rnor_6.0-dbSNP149.genometemplate\sequences\NC_005103_chr4.gbk#0	184226339	NC_005103.4	+	777	69468102..69468878	103692104		LOC103692104
LOC102551470	0.001	0.001	2.142	0.001	1	1	2266.04	1	Z-009379	LOC102551470	gene		D:\assemblies\Rattus_norvegicus-Rnor_6.0-dbSNP149\Rattus_norvegicus-Rnor_6.0-dbSNP149.genometemplate\sequences\NC_005103_chr4.gbk#0	184226339	NC_005103.4	+	774	69477406..69478179	102551470		LOC102551470
LOC102551554	0.001	0.001	0.992	0.001	1	1	1049.68	1	Z-009380	LOC102551554	gene		D:\assemblies\Rattus_norvegicus-Rnor_6.0-dbSNP149\Rattus_norvegicus-Rnor_6.0-dbSNP149.genometemplate\sequences\NC_005103_chr4.gbk#0	184226339	NC_005103.4	+	2348	69493373..69495720	102551554		LOC102551554
LOC102551645	0.001	0.103	0.521	0.001	108.513	108.513	551.467	1	Z-009381	LOC102551645	gene		D:\assemblies\Rattus_norvegicus-Rnor_6.0-dbSNP149\Rattus_norvegicus-Rnor_6.0-dbSNP149.genometemplate\sequences\NC_005103_chr4.gbk#0	184226339	NC_005103.4	+	2261	69496779..69499039	102551645		LOC102551645
LOC102551734	0.001	0.001	0.661	0.001	1	1	699.529	1	Z-009382	LOC102551734	gene		D:\assemblies\Rattus_norvegicus-Rnor_6.0-dbSNP149\Rattus_norvegicus-Rnor_6.0-dbSNP149.genometemplate\sequences\NC_005103_chr4.gbk#0	184226339	NC_005103.4	+	1386	69498500..69499885	102551734		LOC102551734
LOC108348060	0.001	0.001	137.005	0.001	1	1	144959	1	Z-009387	LOC108348060	gene		D:\assemblies\Rattus_norvegicus-Rnor_6.0-dbSNP149\Rattus_norvegicus-Rnor_6.0-dbSNP149.genometemplate\sequences\NC_005103_chr4.gbk#0	184226339	NC_005103.4	+	243797	70578022..70821818	108348060		LOC108348060
LOC102554731	0.06	3.573	472.162	0.738	59.0547	4.83861	639.461	0.0819344	Z-009395	LOC102554731	gene		D:\assemblies\Rattus_norvegicus-Rnor_6.0-dbSNP149\Rattus_norvegicus-Rnor_6.0-dbSNP149.genometemplate\sequences\NC_005103_chr4.gbk#0	184226339	NC_005103.4	+	4820	70825695..70830514	102554731		LOC102554731
Gimap7	2.29	0.227	250.859	2.233	0.0991515	0.101694	112.337	1.02564	Z-009525	Gimap7	gene		D:\assemblies\Rattus_norvegicus-Rnor_6.0-dbSNP149\Rattus_norvegicus-Rnor_6.0-dbSNP149.genometemplate\sequences\NC_005103_chr4.gbk#0	184226339	NC_005103.4	+	4171	78354335..78358505	500113, 1565750		Gimap7	Ian3
Hoxa4	0.038	0.005	0.001	0.471	0.140566	0.0114319	0.00200508	0.0813279	Z-009581	Hoxa4	gene		D:\assemblies\Rattus_norvegicus-Rnor_6.0-dbSNP149\Rattus_norvegicus-Rnor_6.0-dbSNP149.genometemplate\sequences\NC_005103_chr4.gbk#0	184226339	NC_005103.4	-	2084	82160317..82158234	100912525, 2814		Hoxa4
LOC108350714	0.001	0.005	0.026	0.001	5.09306	5.09306	27.363	1	Z-009616	LOC108350714	gene		D:\assemblies\Rattus_norvegicus-Rnor_6.0-dbSNP149\Rattus_norvegicus-Rnor_6.0-dbSNP149.genometemplate\sequences\NC_005103_chr4.gbk#0	184226339	NC_005103.4	-	12656	84314671..84302016	108350714		LOC108350714
Aqp1	27.141	43.945	1.49	32.055	1.61915	1.37094	0.0464803	0.846704	Z-009640	Aqp1	gene		D:\assemblies\Rattus_norvegicus-Rnor_6.0-dbSNP149\Rattus_norvegicus-Rnor_6.0-dbSNP149.genometemplate\sequences\NC_005103_chr4.gbk#0	184226339	NC_005103.4	+	12181	85551503..85563683	25240, 2141		Aqp1	CHIP28
Nap1l5	0.006	0.01	0.467	0.001	1.7468	10.3377	493.6	5.91809	Z-009685	Nap1l5	gene		D:\assemblies\Rattus_norvegicus-Rnor_6.0-dbSNP149\Rattus_norvegicus-Rnor_6.0-dbSNP149.genometemplate\sequences\NC_005103_chr4.gbk#0	184226339	NC_005103.4	-	3198	89152511..89149314	688843, 1584123		Nap1l5
Snca	6.801	14.143	0.001	8.977	2.07969	1.57547	0.000105281	0.757552	Z-009694	Snca	gene		D:\assemblies\Rattus_norvegicus-Rnor_6.0-dbSNP149\Rattus_norvegicus-Rnor_6.0-dbSNP149.genometemplate\sequences\NC_005103_chr4.gbk#0	184226339	NC_005103.4	-	100825	90883236..90782412	29219, 3729		Snca
LOC102552449	0.034	0.001	0.389	0.001	0.0274955	1	411.616	36.3696	Z-009706	LOC102552449	gene		D:\assemblies\Rattus_norvegicus-Rnor_6.0-dbSNP149\Rattus_norvegicus-Rnor_6.0-dbSNP149.genometemplate\sequences\NC_005103_chr4.gbk#0	184226339	NC_005103.4	+	518	93808023..93808540	102552449		LOC102552449
Tnip3	0.041	0.01	0.379	0.001	0.236283	10.3401	400.861	43.7615	Z-009715	Tnip3	gene		D:\assemblies\Rattus_norvegicus-Rnor_6.0-dbSNP149\Rattus_norvegicus-Rnor_6.0-dbSNP149.genometemplate\sequences\NC_005103_chr4.gbk#0	184226339	NC_005103.4	+	104311	96386207..96490517	689756, 1588732		Tnip3
Il23r	0.001	0.001	0.085	0.001	1	1	89.8633	1	Z-009728	Il23r	gene		D:\assemblies\Rattus_norvegicus-Rnor_6.0-dbSNP149\Rattus_norvegicus-Rnor_6.0-dbSNP149.genometemplate\sequences\NC_005103_chr4.gbk#0	184226339	NC_005103.4	-	102942	98306729..98203788	689932, 1586368		Il23r
LOC102549525	0.041	0.007	0.445	0.001	0.174122	7.61932	471.01	43.7584	Z-009735	LOC102549525	gene		D:\assemblies\Rattus_norvegicus-Rnor_6.0-dbSNP149\Rattus_norvegicus-Rnor_6.0-dbSNP149.genometemplate\sequences\NC_005103_chr4.gbk#0	184226339	NC_005103.4	-	2569	98648396..98645828	102549525, 7583063		LOC102549525
Fabp1	0.001	0.001	1.225	0.001	1	1	1296.05	1	Z-009740	Fabp1	gene		D:\assemblies\Rattus_norvegicus-Rnor_6.0-dbSNP149\Rattus_norvegicus-Rnor_6.0-dbSNP149.genometemplate\sequences\NC_005103_chr4.gbk#0	184226339	NC_005103.4	+	3777	99063181..99066957	24360, 2590		Fabp1	Fabplg, L-FABP, p14, SCP, SCP.
LOC108350717	0.005	0.005	1.176	0.001	1.14371	5.46176	1244.61	4.77547	Z-009746	LOC108350717	gene		D:\assemblies\Rattus_norvegicus-Rnor_6.0-dbSNP149\Rattus_norvegicus-Rnor_6.0-dbSNP149.genometemplate\sequences\NC_005103_chr4.gbk#0	184226339	NC_005103.4	+	2028	99215431..99217458	108350717		LOC108350717
Tmsb10	349.425	832.246	3999.55	420.536	2.38176	1.97901	9.51059	0.830903	Z-009781	Tmsb10	gene		D:\assemblies\Rattus_norvegicus-Rnor_6.0-dbSNP149\Rattus_norvegicus-Rnor_6.0-dbSNP149.genometemplate\sequences\NC_005103_chr4.gbk#0	184226339	NC_005103.4	-	1088	100883303..100882216	50665, 62022		Tmsb10	Ptmb10, THYb10
LOC102550611	0.007	0.001	0.644	0.001	0.12967	1	681.625	7.71187	Z-009787	LOC102550611	gene		D:\assemblies\Rattus_norvegicus-Rnor_6.0-dbSNP149\Rattus_norvegicus-Rnor_6.0-dbSNP149.genometemplate\sequences\NC_005103_chr4.gbk#0	184226339	NC_005103.4	+	829	101639629..101640457	102550611		LOC102550611
LOC103692157	0.001	0.007	0.916	0.001	6.94848	6.94848	969.6	1	Z-009790	LOC103692157	gene		D:\assemblies\Rattus_norvegicus-Rnor_6.0-dbSNP149\Rattus_norvegicus-Rnor_6.0-dbSNP149.genometemplate\sequences\NC_005103_chr4.gbk#0	184226339	NC_005103.4	+	3354	101734946..101738299	103692157		LOC103692157
LOC500159	0.497	0.001	1.427	0.001	0.0019034	1	1509.48	525.377	Z-009792	LOC500159	gene		D:\assemblies\Rattus_norvegicus-Rnor_6.0-dbSNP149\Rattus_norvegicus-Rnor_6.0-dbSNP149.genometemplate\sequences\NC_005103_chr4.gbk#0	184226339	NC_005103.4	+	537	101882953..101883489	500159		LOC500159
LOC108350865	0.001	0.001	0.289	0.001	1	1	305.835	1	Z-009808	LOC108350865	gene		D:\assemblies\Rattus_norvegicus-Rnor_6.0-dbSNP149\Rattus_norvegicus-Rnor_6.0-dbSNP149.genometemplate\sequences\NC_005103_chr4.gbk#0	184226339	NC_005103.4	+	1216	102665485..102666700	108350865		LOC108350865
LOC102552245	0.034	0.001	0.389	0.001	0.0274955	1	411.616	36.3696	Z-009810	LOC102552245	gene		D:\assemblies\Rattus_norvegicus-Rnor_6.0-dbSNP149\Rattus_norvegicus-Rnor_6.0-dbSNP149.genometemplate\sequences\NC_005103_chr4.gbk#0	184226339	NC_005103.4	+	518	102804921..102805438	102552245		LOC102552245
LOC108350718	0.001	0.001	2.04	0.001	1	1	2158.65	1	Z-009815	LOC108350718	gene		D:\assemblies\Rattus_norvegicus-Rnor_6.0-dbSNP149\Rattus_norvegicus-Rnor_6.0-dbSNP149.genometemplate\sequences\NC_005103_chr4.gbk#0	184226339	NC_005103.4	-	695	103145468..103144774	108350718		LOC108350718
Reg3b	0.001	0.001	3.827	0.001	1	1	4049.12	1	Z-009833	Reg3b	gene		D:\assemblies\Rattus_norvegicus-Rnor_6.0-dbSNP149\Rattus_norvegicus-Rnor_6.0-dbSNP149.genometemplate\sequences\NC_005103_chr4.gbk#0	184226339	NC_005103.4	+	3239	109467272..109470510	24618, 3254		Reg3b	Pap, Pap1
Reg3g	0.001	0.001	3.84	0.001	1	1	4062.62	1	Z-009837	Reg3g	gene		D:\assemblies\Rattus_norvegicus-Rnor_6.0-dbSNP149\Rattus_norvegicus-Rnor_6.0-dbSNP149.genometemplate\sequences\NC_005103_chr4.gbk#0	184226339	NC_005103.4	-	2556	109532234..109529679	24620, 3256		Reg3g	Pap3, PAPIII
Sema4f	0.005	0.154	1.067	0.001	34.1494	162.94	1129.11	4.77139	Z-009851	Sema4f	gene		D:\assemblies\Rattus_norvegicus-Rnor_6.0-dbSNP149\Rattus_norvegicus-Rnor_6.0-dbSNP149.genometemplate\sequences\NC_005103_chr4.gbk#0	184226339	NC_005103.4	-	26308	113764532..113738225	29745, 3658		Sema4f
M1ap	0.005	0.007	0.121	0.001	1.21117	6.88964	127.641	5.68844	Z-009852	M1ap	gene		D:\assemblies\Rattus_norvegicus-Rnor_6.0-dbSNP149\Rattus_norvegicus-Rnor_6.0-dbSNP149.genometemplate\sequences\NC_005103_chr4.gbk#0	184226339	NC_005103.4	+	91456	113772716..113864171	500223, 1563842		M1ap
Dqx1	0.227	0.043	3.149	0.166	0.191251	0.261592	18.9367	1.36779	Z-009857	Dqx1	gene		D:\assemblies\Rattus_norvegicus-Rnor_6.0-dbSNP149\Rattus_norvegicus-Rnor_6.0-dbSNP149.genometemplate\sequences\NC_005103_chr4.gbk#0	184226339	NC_005103.4	+	9155	113890201..113899355	680434, 1591766		Dqx1
NEWGENE_1595506	0.001	0.001	0.077	0.001	1	1	81.8252	1	Z-009858	NEWGENE_1595506	gene		D:\assemblies\Rattus_norvegicus-Rnor_6.0-dbSNP149\Rattus_norvegicus-Rnor_6.0-dbSNP149.genometemplate\sequences\NC_005103_chr4.gbk#0	184226339	NC_005103.4	-	3113	113903554..113900442	103692164, 9162340		NEWGENE_1595506
Tlx2	0.001	0.001	0.077	0.001	1	1	81.8252	1	Z-009870	Tlx2	gene		D:\assemblies\Rattus_norvegicus-Rnor_6.0-dbSNP149\Rattus_norvegicus-Rnor_6.0-dbSNP149.genometemplate\sequences\NC_005103_chr4.gbk#0	184226339	NC_005103.4	-	1843	114768243..114766401	680117, 1595506		Tlx2	Hox11L.1
LOC108350818	0.009	0.109	0.001	0.185	12.5829	0.590834	0.00510384	0.0469555	Z-009896	LOC108350818	gene		D:\assemblies\Rattus_norvegicus-Rnor_6.0-dbSNP149\Rattus_norvegicus-Rnor_6.0-dbSNP149.genometemplate\sequences\NC_005103_chr4.gbk#0	184226339	NC_005103.4	+	7770	115379134..115386903	108350818		LOC108350818
Dusp11	3.217	9.917	39.518	4.397	3.08228	2.2556	8.98837	0.731796	Z-009930	Dusp11	gene		D:\assemblies\Rattus_norvegicus-Rnor_6.0-dbSNP149\Rattus_norvegicus-Rnor_6.0-dbSNP149.genometemplate\sequences\NC_005103_chr4.gbk#0	184226339	NC_005103.4	-	14035	117631674..117617640	297412, 1307038		Dusp11
LOC103690006	3.217	9.917	39.518	4.397	3.08228	2.2556	8.98837	0.731796	Z-009939	LOC103690006	gene		D:\assemblies\Rattus_norvegicus-Rnor_6.0-dbSNP149\Rattus_norvegicus-Rnor_6.0-dbSNP149.genometemplate\sequences\NC_005103_chr4.gbk#0	184226339	NC_005103.4	-	16998	117814732..117797735	103690006, 9168966		LOC103690006
Gpr27	0.54	0.01	0.001	0.324	0.0182934	0.0304686	0.00291678	1.66555	Z-010096	Gpr27	gene		D:\assemblies\Rattus_norvegicus-Rnor_6.0-dbSNP149\Rattus_norvegicus-Rnor_6.0-dbSNP149.genometemplate\sequences\NC_005103_chr4.gbk#0	184226339	NC_005103.4	+	1134	132137793..132138926	65275, 71067		Gpr27	Sreb1
LOC103692197	0.001	0.001	0.074	0.001	1	1	78.6715	1	Z-010101	LOC103692197	gene		D:\assemblies\Rattus_norvegicus-Rnor_6.0-dbSNP149\Rattus_norvegicus-Rnor_6.0-dbSNP149.genometemplate\sequences\NC_005103_chr4.gbk#0	184226339	NC_005103.4	-	8801	132439747..132430947	103692197, 9307839		LOC103692197
LOC108350743	0.001	0.008	0.076	0.001	8.91387	8.91387	80.4975	1	Z-010137	LOC108350743	gene		D:\assemblies\Rattus_norvegicus-Rnor_6.0-dbSNP149\Rattus_norvegicus-Rnor_6.0-dbSNP149.genometemplate\sequences\NC_005103_chr4.gbk#0	184226339	NC_005103.4	-	9122	142006546..141997425	108350743		LOC108350743
Thumpd3-as1	0.944	2.762	23.228	0.915	2.92675	3.0178	25.3785	1.03111	Z-010150	Thumpd3-as1	gene		D:\assemblies\Rattus_norvegicus-Rnor_6.0-dbSNP149\Rattus_norvegicus-Rnor_6.0-dbSNP149.genometemplate\sequences\NC_005103_chr4.gbk#0	184226339	NC_005103.4	-	6507	145017388..145010882	100911652, 6491660		Thumpd3-as1
LOC102548450	0.167	0.041	1.269	0.001	0.244522	43.1724	1342.79	176.558	Z-010163	LOC102548450	gene		D:\assemblies\Rattus_norvegicus-Rnor_6.0-dbSNP149\Rattus_norvegicus-Rnor_6.0-dbSNP149.genometemplate\sequences\NC_005103_chr4.gbk#0	184226339	NC_005103.4	+	3098	145373527..145376624	102548450, 7499834		LOC102548450
LOC108350745	0.001	0.001	0.012	0.001	1	1	13.0377	1	Z-010180	LOC108350745	gene		D:\assemblies\Rattus_norvegicus-Rnor_6.0-dbSNP149\Rattus_norvegicus-Rnor_6.0-dbSNP149.genometemplate\sequences\NC_005103_chr4.gbk#0	184226339	NC_005103.4	+	14838	146071280..146086117	108350745		LOC108350745
LOC108350747	0.006	0.008	0.19	0.001	1.26867	8.0208	201.398	6.32223	Z-010186	LOC108350747	gene		D:\assemblies\Rattus_norvegicus-Rnor_6.0-dbSNP149\Rattus_norvegicus-Rnor_6.0-dbSNP149.genometemplate\sequences\NC_005103_chr4.gbk#0	184226339	NC_005103.4	-	1695	146560078..146558384	108350747		LOC108350747
Tmem40	3.279	0.393	0.001	2.115	0.119874	0.185796	0.000446769	1.54993	Z-010199	Tmem40	gene		D:\assemblies\Rattus_norvegicus-Rnor_6.0-dbSNP149\Rattus_norvegicus-Rnor_6.0-dbSNP149.genometemplate\sequences\NC_005103_chr4.gbk#0	184226339	NC_005103.4	-	12515	147657847..147645333	680858, 1587025		Tmem40	RGD1306976
Rpl32	651.359	1681.68	8856.48	791.872	2.5818	2.12368	11.1842	0.822557	Z-010201	Rpl32	gene		D:\assemblies\Rattus_norvegicus-Rnor_6.0-dbSNP149\Rattus_norvegicus-Rnor_6.0-dbSNP149.genometemplate\sequences\NC_005103_chr4.gbk#0	184226339	NC_005103.4	-	3565	147719044..147715480	28298, 621203		Rpl32
Wnt5b	0.108	0.01	0.17	0.001	0.0915195	10.4368	180.341	114.04	Z-010250	Wnt5b	gene		D:\assemblies\Rattus_norvegicus-Rnor_6.0-dbSNP149\Rattus_norvegicus-Rnor_6.0-dbSNP149.genometemplate\sequences\NC_005103_chr4.gbk#0	184226339	NC_005103.4	-	15933	151516894..151500962	282582, 628850		Wnt5b
Cecr6	0.239	1.201	7.241	0.211	5.02786	5.68762	34.2821	1.13122	Z-010260	Cecr6	gene		D:\assemblies\Rattus_norvegicus-Rnor_6.0-dbSNP149\Rattus_norvegicus-Rnor_6.0-dbSNP149.genometemplate\sequences\NC_005103_chr4.gbk#0	184226339	NC_005103.4	-	11511	153029673..153018163	500307, 1565302		Cecr6
Aicda	0.001	0.006	1.365	0.001	6.43415	6.43415	1444.27	1	Z-010299	Aicda	gene		D:\assemblies\Rattus_norvegicus-Rnor_6.0-dbSNP149\Rattus_norvegicus-Rnor_6.0-dbSNP149.genometemplate\sequences\NC_005103_chr4.gbk#0	184226339	NC_005103.4	+	11196	155359909..155371104	399679, 1303222		Aicda	aid
Clec4d	1.408	2.038	0.001	1.438	1.44774	1.41743	0.000657251	0.979065	Z-010315	Clec4d	gene		D:\assemblies\Rattus_norvegicus-Rnor_6.0-dbSNP149\Rattus_norvegicus-Rnor_6.0-dbSNP149.genometemplate\sequences\NC_005103_chr4.gbk#0	184226339	NC_005103.4	+	11683	156253084..156264766	362432, 1303339		Clec4d	Clecsf8, Mcl
Cd163	12.664	8.706	0.409	14.409	0.687449	0.604182	0.0283578	0.878876	Z-010322	Cd163	gene		D:\assemblies\Rattus_norvegicus-Rnor_6.0-dbSNP149\Rattus_norvegicus-Rnor_6.0-dbSNP149.genometemplate\sequences\NC_005103_chr4.gbk#0	184226339	NC_005103.4	+	33405	156752063..156785467	312701, 1310382		Cd163
LOC102553919	0.005	0.001	1.956	0.001	0.177999	1	2069.74	5.61802	Z-010343	LOC102553919	gene		D:\assemblies\Rattus_norvegicus-Rnor_6.0-dbSNP149\Rattus_norvegicus-Rnor_6.0-dbSNP149.genometemplate\sequences\NC_005103_chr4.gbk#0	184226339	NC_005103.4	+	798	157274519..157275316	102553919, 7547546		LOC102553919
Pianp	0.011	0.007	0.209	0.001	0.597884	7.18093	221.103	12.0106	Z-010359	Pianp	gene		D:\assemblies\Rattus_norvegicus-Rnor_6.0-dbSNP149\Rattus_norvegicus-Rnor_6.0-dbSNP149.genometemplate\sequences\NC_005103_chr4.gbk#0	184226339	NC_005103.4	+	8815	157508862..157517676	312711, 1304952		Pianp	leda-1, PANP, RGD1304952
LOC102555485	0.004	0.785	0.127	0.001	191.882	830.425	134.149	4.32778	Z-010374	LOC102555485	gene		D:\assemblies\Rattus_norvegicus-Rnor_6.0-dbSNP149\Rattus_norvegicus-Rnor_6.0-dbSNP149.genometemplate\sequences\NC_005103_chr4.gbk#0	184226339	NC_005103.4	+	2748	157751751..157754498	102555485, 7654957		LOC102555485
LOC102548836	0.001	0.004	0.01	0.001	3.774	3.774	11.1013	1	Z-010409	LOC102548836	gene		D:\assemblies\Rattus_norvegicus-Rnor_6.0-dbSNP149\Rattus_norvegicus-Rnor_6.0-dbSNP149.genometemplate\sequences\NC_005103_chr4.gbk#0	184226339	NC_005103.4	-	16436	160357962..160341527	102548836, 7623583		LOC102548836
Pzp	0.003	0.017	0.043	0.001	6.08936	17.4892	44.9802	2.8721	Z-010443	Pzp	gene		D:\assemblies\Rattus_norvegicus-Rnor_6.0-dbSNP149\Rattus_norvegicus-Rnor_6.0-dbSNP149.genometemplate\sequences\NC_005103_chr4.gbk#0	184226339	NC_005103.4	-	46086	161850877..161804792	252922, 628643		Pzp	A1m
LOC102554736	0.004	0.001	0.043	0.001	0.225971	1	45.311	4.42534	Z-010446	LOC102554736	gene		D:\assemblies\Rattus_norvegicus-Rnor_6.0-dbSNP149\Rattus_norvegicus-Rnor_6.0-dbSNP149.genometemplate\sequences\NC_005103_chr4.gbk#0	184226339	NC_005103.4	-	16523	161945250..161928728	102554736, 7556630		LOC102554736
Clec2d2	0.005	0.007	0.75	0.001	1.38644	7.16778	793.097	5.16992	Z-010459	Clec2d2	gene		D:\assemblies\Rattus_norvegicus-Rnor_6.0-dbSNP149\Rattus_norvegicus-Rnor_6.0-dbSNP149.genometemplate\sequences\NC_005103_chr4.gbk#0	184226339	NC_005103.4	+	16616	162434155..162450770	362445, 1562831		Clec2d2	Clr2, RGD1562831
LOC100362418	0.001	0.001	0.213	0.001	1	1	225.788	1	Z-010468	LOC100362418	gene		D:\assemblies\Rattus_norvegicus-Rnor_6.0-dbSNP149\Rattus_norvegicus-Rnor_6.0-dbSNP149.genometemplate\sequences\NC_005103_chr4.gbk#0	184226339	NC_005103.4	+	5349	162880504..162885852	100362418, 2318170		LOC100362418
Clec9a	0.013	0.069	0.542	0.001	5.33922	73.0095	573.681	13.6742	Z-010479	Clec9a	gene		D:\assemblies\Rattus_norvegicus-Rnor_6.0-dbSNP149\Rattus_norvegicus-Rnor_6.0-dbSNP149.genometemplate\sequences\NC_005103_chr4.gbk#0	184226339	NC_005103.4	+	15940	163173593..163189532	502901, 1562513		Clec9a	RGD1562513
Klre1	0.001	0.001	0.969	0.001	1	1	1025.55	1	Z-010486	Klre1	gene		D:\assemblies\Rattus_norvegicus-Rnor_6.0-dbSNP149\Rattus_norvegicus-Rnor_6.0-dbSNP149.genometemplate\sequences\NC_005103_chr4.gbk#0	184226339	NC_005103.4	+	8367	163346684..163355050	297645, 727903		Klre1
Klrd1	0.001	0.009	19.062	0.001	9.97786	9.97786	20168.4	1	Z-010487	Klrd1	gene		D:\assemblies\Rattus_norvegicus-Rnor_6.0-dbSNP149\Rattus_norvegicus-Rnor_6.0-dbSNP149.genometemplate\sequences\NC_005103_chr4.gbk#0	184226339	NC_005103.4	+	11571	163358355..163369925	25110, 2978		Klrd1	Cd94
Klri1	0.045	0.071	3.68	0.001	1.57908	75.5751	3893.2	47.8601	Z-010492	Klri1	gene		D:\assemblies\Rattus_norvegicus-Rnor_6.0-dbSNP149\Rattus_norvegicus-Rnor_6.0-dbSNP149.genometemplate\sequences\NC_005103_chr4.gbk#0	184226339	NC_005103.4	-	33259	163528237..163494979	503651, 1359344		Klri1
Ly49s5	0.001	0.001	0.271	0.001	1	1	286.885	1	Z-010507	Ly49s5	gene		D:\assemblies\Rattus_norvegicus-Rnor_6.0-dbSNP149\Rattus_norvegicus-Rnor_6.0-dbSNP149.genometemplate\sequences\NC_005103_chr4.gbk#0	184226339	NC_005103.4	-	21591	164306500..164284910	503662, 1359728		Ly49s5
LOC103692235	0.001	0.001	2.465	0.001	1	1	2608.63	1	Z-010515	LOC103692235	gene		D:\assemblies\Rattus_norvegicus-Rnor_6.0-dbSNP149\Rattus_norvegicus-Rnor_6.0-dbSNP149.genometemplate\sequences\NC_005103_chr4.gbk#0	184226339	NC_005103.4	-	381	164788838..164788458	103692235, 9263295		LOC103692235
LOC690326	0.053	0.012	1.085	0.001	0.234793	13.2089	1147.48	56.2575	Z-010526	LOC690326	gene		D:\assemblies\Rattus_norvegicus-Rnor_6.0-dbSNP149\Rattus_norvegicus-Rnor_6.0-dbSNP149.genometemplate\sequences\NC_005103_chr4.gbk#0	184226339	NC_005103.4	+	54783	165682977..165737759	690326, 1597362		LOC690326
Prpmp5	0.001	0.001	0.236	0.001	1	1	250.125	1	Z-010534	Prpmp5	gene		D:\assemblies\Rattus_norvegicus-Rnor_6.0-dbSNP149\Rattus_norvegicus-Rnor_6.0-dbSNP149.genometemplate\sequences\NC_005103_chr4.gbk#0	184226339	NC_005103.4	-	3110	166016335..166013226	257651, 628797		Prpmp5	Prb1, Prpg2
Prr21	0.001	0.001	0.073	0.001	1	1	77.1685	1	Z-010535	Prr21	gene		D:\assemblies\Rattus_norvegicus-Rnor_6.0-dbSNP149\Rattus_norvegicus-Rnor_6.0-dbSNP149.genometemplate\sequences\NC_005103_chr4.gbk#0	184226339	NC_005103.4	+	4806	166040503..166045308	245985, 620386		Prr21	Sgp158
Tas2r140	0.001	0.001	0.369	0.001	1	1	390.519	1	Z-010562	Tas2r140	gene		D:\assemblies\Rattus_norvegicus-Rnor_6.0-dbSNP149\Rattus_norvegicus-Rnor_6.0-dbSNP149.genometemplate\sequences\NC_005103_chr4.gbk#0	184226339	NC_005103.4	-	939	167202106..167201168	689869, 1587511		Tas2r140
Bcl2l14	0.01	0.008	2.149	0.001	0.79921	8.07763	2273.52	10.107	Z-010572	Bcl2l14	gene		D:\assemblies\Rattus_norvegicus-Rnor_6.0-dbSNP149\Rattus_norvegicus-Rnor_6.0-dbSNP149.genometemplate\sequences\NC_005103_chr4.gbk#0	184226339	NC_005103.4	+	43763	168139964..168183726	500348, 1562777		Bcl2l14
Emp1	4.935	6.903	0.001	8.345	1.39884	0.827124	0.000113252	0.591294	Z-010594	Emp1	gene		D:\assemblies\Rattus_norvegicus-Rnor_6.0-dbSNP149\Rattus_norvegicus-Rnor_6.0-dbSNP149.genometemplate\sequences\NC_005103_chr4.gbk#0	184226339	NC_005103.4	+	20892	169161076..169181967	25314, 2552		Emp1	CL-20, EMP-1, ENP1MR, TMP
LOC103690002	14.114	51.471	196.244	20.029	3.64673	2.56976	9.79777	0.704675	Z-010601	LOC103690002	gene		D:\assemblies\Rattus_norvegicus-Rnor_6.0-dbSNP149\Rattus_norvegicus-Rnor_6.0-dbSNP149.genometemplate\sequences\NC_005103_chr4.gbk#0	184226339	NC_005103.4	+	525	170148955..170149479	103690002, 9140761		LOC103690002
H2afj	14.114	51.471	196.244	20.029	3.64673	2.56976	9.79777	0.704675	Z-010616	H2afj	gene		D:\assemblies\Rattus_norvegicus-Rnor_6.0-dbSNP149\Rattus_norvegicus-Rnor_6.0-dbSNP149.genometemplate\sequences\NC_005103_chr4.gbk#0	184226339	NC_005103.4	+	485	170766900..170767384	690795, 1592176		H2afj	H2a/j
LOC102547697	0.009	0.316	0.034	0.001	33.8093	334.112	36.3436	9.88227	Z-010645	LOC102547697	gene		D:\assemblies\Rattus_norvegicus-Rnor_6.0-dbSNP149\Rattus_norvegicus-Rnor_6.0-dbSNP149.genometemplate\sequences\NC_005103_chr4.gbk#0	184226339	NC_005103.4	-	16667	173449495..173432829	102547697, 7691241		LOC102547697
Pde3a	0.222	0.09	0.001	0.442	0.406648	0.204719	0.00213989	0.503431	Z-010659	Pde3a	gene		D:\assemblies\Rattus_norvegicus-Rnor_6.0-dbSNP149\Rattus_norvegicus-Rnor_6.0-dbSNP149.genometemplate\sequences\NC_005103_chr4.gbk#0	184226339	NC_005103.4	+	271941	175431904..175703844	50678, 61942		Pde3a	RNPDE3A
St8sia1	0.006	0.001	3.491	0.001	0.161723	1	3693.66	6.18343	Z-010683	St8sia1	gene		D:\assemblies\Rattus_norvegicus-Rnor_6.0-dbSNP149\Rattus_norvegicus-Rnor_6.0-dbSNP149.genometemplate\sequences\NC_005103_chr4.gbk#0	184226339	NC_005103.4	-	130677	177195942..177065266	25280, 3679		St8sia1	Siat8, Siat8a
LOC108350787	0.005	0.001	0.001	0.031	0.198073	0.0303664	0.0303664	0.153309	Z-010700	LOC108350787	gene		D:\assemblies\Rattus_norvegicus-Rnor_6.0-dbSNP149\Rattus_norvegicus-Rnor_6.0-dbSNP149.genometemplate\sequences\NC_005103_chr4.gbk#0	184226339	NC_005103.4	+	34153	179759657..179793809	108350787		LOC108350787
LOC108350792	0.001	0.004	0.033	0.001	4.59459	4.59459	34.9978	1	Z-010722	LOC108350792	gene		D:\assemblies\Rattus_norvegicus-Rnor_6.0-dbSNP149\Rattus_norvegicus-Rnor_6.0-dbSNP149.genometemplate\sequences\NC_005103_chr4.gbk#0	184226339	NC_005103.4	+	13307	181161314..181174620	108350792		LOC108350792
LOC108350793	0.001	0.004	0.033	0.001	4.59459	4.59459	34.9978	1	Z-010724	LOC108350793	gene		D:\assemblies\Rattus_norvegicus-Rnor_6.0-dbSNP149\Rattus_norvegicus-Rnor_6.0-dbSNP149.genometemplate\sequences\NC_005103_chr4.gbk#0	184226339	NC_005103.4	+	13319	181224227..181237545	108350793		LOC108350793
LOC102554020	0.004	0.001	0.098	0.001	0.268169	1	104.03	3.729	Z-010736	LOC102554020	gene		D:\assemblies\Rattus_norvegicus-Rnor_6.0-dbSNP149\Rattus_norvegicus-Rnor_6.0-dbSNP149.genometemplate\sequences\NC_005103_chr4.gbk#0	184226339	NC_005103.4	+	5678	182091757..182097434	102554020, 7718100		LOC102554020
Slco5a1	0.018	0.001	0.654	0.001	0.0534384	1	692.142	18.7131	Z-010801	Slco5a1	gene		D:\assemblies\Rattus_norvegicus-Rnor_6.0-dbSNP149\Rattus_norvegicus-Rnor_6.0-dbSNP149.genometemplate\sequences\NC_005104_chr5.gbk#0	173707219	NC_005104.4	+	128387	5866362..5994748	312907, 1307132		Slco5a1
LOC108350926	0.001	0.001	1.586	0.001	1	1	1677.7	1	Z-010882	LOC108350926	gene		D:\assemblies\Rattus_norvegicus-Rnor_6.0-dbSNP149\Rattus_norvegicus-Rnor_6.0-dbSNP149.genometemplate\sequences\NC_005104_chr5.gbk#0	173707219	NC_005104.4	+	2020	19905769..19907788	108350926		LOC108350926
LOC108350929	0.001	0.004	0.056	0.001	4.42188	4.42188	58.9597	1	Z-010891	LOC108350929	gene		D:\assemblies\Rattus_norvegicus-Rnor_6.0-dbSNP149\Rattus_norvegicus-Rnor_6.0-dbSNP149.genometemplate\sequences\NC_005104_chr5.gbk#0	173707219	NC_005104.4	-	18938	21887949..21869012	108350929		LOC108350929
Gdf6	0.001	0.001	0.097	0.001	1	1	102.959	1	Z-010900	Gdf6	gene		D:\assemblies\Rattus_norvegicus-Rnor_6.0-dbSNP149\Rattus_norvegicus-Rnor_6.0-dbSNP149.genometemplate\sequences\NC_005104_chr5.gbk#0	173707219	NC_005104.4	+	16322	23056345..23072666	252834, 620104		Gdf6	BMP-13, gdf16
Slc26a7	0.01	0.31	0.001	0.249	30.6047	1.24508	0.00379629	0.0406826	Z-010949	Slc26a7	gene		D:\assemblies\Rattus_norvegicus-Rnor_6.0-dbSNP149\Rattus_norvegicus-Rnor_6.0-dbSNP149.genometemplate\sequences\NC_005104_chr5.gbk#0	173707219	NC_005104.4	-	144639	28131294..27986656	297910, 1310846		Slc26a7
LOC108350939	0.001	0.001	0.085	0.001	1	1	90.0355	1	Z-010976	LOC108350939	gene		D:\assemblies\Rattus_norvegicus-Rnor_6.0-dbSNP149\Rattus_norvegicus-Rnor_6.0-dbSNP149.genometemplate\sequences\NC_005104_chr5.gbk#0	173707219	NC_005104.4	+	10752	33627921..33638672	108350939		LOC108350939
Atp6v0d2	0.735	0.119	0.001	0.305	0.162287	0.391082	0.00310039	2.40981	Z-010978	Atp6v0d2	gene		D:\assemblies\Rattus_norvegicus-Rnor_6.0-dbSNP149\Rattus_norvegicus-Rnor_6.0-dbSNP149.genometemplate\sequences\NC_005104_chr5.gbk#0	173707219	NC_005104.4	-	48856	33892446..33843591	297932, 1306900		Atp6v0d2
Ttpa	0.736	0.179	0.001	1.731	0.243398	0.103509	0.00054585	0.425268	Z-010979	Ttpa	gene		D:\assemblies\Rattus_norvegicus-Rnor_6.0-dbSNP149\Rattus_norvegicus-Rnor_6.0-dbSNP149.genometemplate\sequences\NC_005104_chr5.gbk#0	173707219	NC_005104.4	+	21390	34007926..34029315	25571, 3915		Ttpa	TTP
LOC108350946	0.005	0.027	0.022	0.001	5.18609	28.6601	23.3163	5.52635	Z-011017	LOC108350946	gene		D:\assemblies\Rattus_norvegicus-Rnor_6.0-dbSNP149\Rattus_norvegicus-Rnor_6.0-dbSNP149.genometemplate\sequences\NC_005104_chr5.gbk#0	173707219	NC_005104.4	-	7771	47528784..47521014	108350946		LOC108350946
RGD1563056	0.001	0.001	0.503	0.001	1	1	531.819	1	Z-011052	RGD1563056	gene		D:\assemblies\Rattus_norvegicus-Rnor_6.0-dbSNP149\Rattus_norvegicus-Rnor_6.0-dbSNP149.genometemplate\sequences\NC_005104_chr5.gbk#0	173707219	NC_005104.4	-	11258	50221560..50210303	500434, 1563056		RGD1563056
LOC690918	0.001	0.001	0.374	0.001	1	1	395.257	1	Z-011079	LOC690918	gene		D:\assemblies\Rattus_norvegicus-Rnor_6.0-dbSNP149\Rattus_norvegicus-Rnor_6.0-dbSNP149.genometemplate\sequences\NC_005104_chr5.gbk#0	173707219	NC_005104.4	+	3258	56797502..56800759	690918, 1589861		LOC690918
Aqp3	0.776	1.535	0.001	0.88	1.97831	1.74428	0.00107383	0.881702	Z-011091	Aqp3	gene		D:\assemblies\Rattus_norvegicus-Rnor_6.0-dbSNP149\Rattus_norvegicus-Rnor_6.0-dbSNP149.genometemplate\sequences\NC_005104_chr5.gbk#0	173707219	NC_005104.4	-	5518	57429252..57423735	65133, 68428		Aqp3
Enho	0.645	0.013	0.001	0.91	0.0205411	0.0145501	0.00103809	0.708342	Z-011105	Enho	gene		D:\assemblies\Rattus_norvegicus-Rnor_6.0-dbSNP149\Rattus_norvegicus-Rnor_6.0-dbSNP149.genometemplate\sequences\NC_005104_chr5.gbk#0	173707219	NC_005104.4	-	1798	58019836..58018039	100912292, 6487582		Enho	RGD1565232
Ccl27	0.001	0.01	1.168	0.001	11.0962	11.0962	1235.7	1	Z-011115	Ccl27	gene		D:\assemblies\Rattus_norvegicus-Rnor_6.0-dbSNP149\Rattus_norvegicus-Rnor_6.0-dbSNP149.genometemplate\sequences\NC_005104_chr5.gbk#0	173707219	NC_005104.4	-	7117	58166182..58159066	362505, 1304660		Ccl27
Ccl19	0.001	0.009	308.114	0.001	9.90778	9.90778	326002	1	Z-011117	Ccl19	gene		D:\assemblies\Rattus_norvegicus-Rnor_6.0-dbSNP149\Rattus_norvegicus-Rnor_6.0-dbSNP149.genometemplate\sequences\NC_005104_chr5.gbk#0	173707219	NC_005104.4	-	1945	58182969..58181025	362506, 1310336		Ccl19
Ccl21	2.447	0.091	1731.24	0.634	0.037153	0.143464	2731.64	3.86143	Z-011118	Ccl21	gene		D:\assemblies\Rattus_norvegicus-Rnor_6.0-dbSNP149\Rattus_norvegicus-Rnor_6.0-dbSNP149.genometemplate\sequences\NC_005104_chr5.gbk#0	173707219	NC_005104.4	-	1105	58198782..58197678	298006, 1311996		Ccl21	Ccl21b
LOC100360779	0.001	0.001	0.096	0.001	1	1	101.309	1	Z-011119	LOC100360779	gene		D:\assemblies\Rattus_norvegicus-Rnor_6.0-dbSNP149\Rattus_norvegicus-Rnor_6.0-dbSNP149.genometemplate\sequences\NC_005104_chr5.gbk#0	173707219	NC_005104.4	-	8586	58222643..58214058	100360779, 2321479		LOC100360779
Fam214b	6.104	9.284	0.261	7.356	1.52113	1.26214	0.0354802	0.829742	Z-011129	Fam214b	gene		D:\assemblies\Rattus_norvegicus-Rnor_6.0-dbSNP149\Rattus_norvegicus-Rnor_6.0-dbSNP149.genometemplate\sequences\NC_005104_chr5.gbk#0	173707219	NC_005104.4	-	7007	58484900..58477894	298201, 1311249		Fam214b	RGD1311249
Spag8	0.001	0.001	5.053	0.001	1	1	5346.1	1	Z-011151	Spag8	gene		D:\assemblies\Rattus_norvegicus-Rnor_6.0-dbSNP149\Rattus_norvegicus-Rnor_6.0-dbSNP149.genometemplate\sequences\NC_005104_chr5.gbk#0	173707219	NC_005104.4	-	2214	59149625..59147412	362508, 1307079		Spag8
Igfbpl1	0.001	0.001	0.296	0.001	1	1	312.735	1	Z-011189	Igfbpl1	gene		D:\assemblies\Rattus_norvegicus-Rnor_6.0-dbSNP149\Rattus_norvegicus-Rnor_6.0-dbSNP149.genometemplate\sequences\NC_005104_chr5.gbk#0	173707219	NC_005104.4	-	15406	61410812..61395407	366366, 1305656		Igfbpl1
Tmod1	1.878	4.191	0.122	3.63	2.23195	1.15447	0.0337292	0.517245	Z-011194	Tmod1	gene		D:\assemblies\Rattus_norvegicus-Rnor_6.0-dbSNP149\Rattus_norvegicus-Rnor_6.0-dbSNP149.genometemplate\sequences\NC_005104_chr5.gbk#0	173707219	NC_005104.4	+	76809	61635244..61712052	25566, 3874		Tmod1	E-Tmod, Tmod
LOC102555188	0.003	0.005	0.039	0.001	1.72718	5.72655	41.7266	3.31554	Z-011241	LOC102555188	gene		D:\assemblies\Rattus_norvegicus-Rnor_6.0-dbSNP149\Rattus_norvegicus-Rnor_6.0-dbSNP149.genometemplate\sequences\NC_005104_chr5.gbk#0	173707219	NC_005104.4	+	22821	64817052..64839872	102555188, 7726668		LOC102555188
LOC108350976	0.004	0.451	0.042	0.001	117.063	477.264	44.6035	4.07698	Z-011284	LOC108350976	gene		D:\assemblies\Rattus_norvegicus-Rnor_6.0-dbSNP149\Rattus_norvegicus-Rnor_6.0-dbSNP149.genometemplate\sequences\NC_005104_chr5.gbk#0	173707219	NC_005104.4	+	42743	71433444..71476186	108350976		LOC108350976
Palm2	0.032	0.012	0.001	0.493	0.371461	0.0240124	0.00191601	0.064643	Z-011307	Palm2	gene		D:\assemblies\Rattus_norvegicus-Rnor_6.0-dbSNP149\Rattus_norvegicus-Rnor_6.0-dbSNP149.genometemplate\sequences\NC_005104_chr5.gbk#0	173707219	NC_005104.4	+	138300	74649765..74788064	103692368, 6497336		Palm2
LOC103692362	0.008	0.012	3.682	0.001	1.45226	12.4592	3896	8.57916	Z-011314	LOC103692362	gene		D:\assemblies\Rattus_norvegicus-Rnor_6.0-dbSNP149\Rattus_norvegicus-Rnor_6.0-dbSNP149.genometemplate\sequences\NC_005104_chr5.gbk#0	173707219	NC_005104.4	-	1257	75144774..75143518	103692362, 9130195		LOC103692362
LOC103689928	0.009	0.008	0.001	0.175	0.935856	0.0457035	0.00540145	0.048836	Z-011347	LOC103689928	gene		D:\assemblies\Rattus_norvegicus-Rnor_6.0-dbSNP149\Rattus_norvegicus-Rnor_6.0-dbSNP149.genometemplate\sequences\NC_005104_chr5.gbk#0	173707219	NC_005104.4	-	618	77475541..77474924	103689928, 9199040		LOC103689928
Orm1	1.887	3.79	0.001	2.697	2.00827	1.4054	0.000350429	0.699807	Z-011376	Orm1	gene		D:\assemblies\Rattus_norvegicus-Rnor_6.0-dbSNP149\Rattus_norvegicus-Rnor_6.0-dbSNP149.genometemplate\sequences\NC_005104_chr5.gbk#0	173707219	NC_005104.4	+	3153	79179668..79182820	24614, 67390		Orm1	AGP, Agpa1, OMD, Orm
LOC103692377	0.001	0.001	0.38	0.001	1	1	401.752	1	Z-011386	LOC103692377	gene		D:\assemblies\Rattus_norvegicus-Rnor_6.0-dbSNP149\Rattus_norvegicus-Rnor_6.0-dbSNP149.genometemplate\sequences\NC_005104_chr5.gbk#0	173707219	NC_005104.4	+	55576	79922422..79977997	103692377, 9234855		LOC103692377
RGD1306186	0.006	0.006	0.001	0.185	0.969782	0.0335147	0.00511559	0.0345589	Z-011434	RGD1306186	gene		D:\assemblies\Rattus_norvegicus-Rnor_6.0-dbSNP149\Rattus_norvegicus-Rnor_6.0-dbSNP149.genometemplate\sequences\NC_005104_chr5.gbk#0	173707219	NC_005104.4	+	7067	99172904..99179970	298621, 1306186		RGD1306186
Ifna5	0.001	0.001	0.001	0.223	1	0.00422898	0.00422898	0.00422898	Z-011485	Ifna5	gene		D:\assemblies\Rattus_norvegicus-Rnor_6.0-dbSNP149\Rattus_norvegicus-Rnor_6.0-dbSNP149.genometemplate\sequences\NC_005104_chr5.gbk#0	173707219	NC_005104.4	+	1087	106951822..106952908	690894, 1306135		Ifna5
LOC108351136	0.001	0.001	0.208	0.001	1	1	219.912	1	Z-011537	LOC108351136	gene		D:\assemblies\Rattus_norvegicus-Rnor_6.0-dbSNP149\Rattus_norvegicus-Rnor_6.0-dbSNP149.genometemplate\sequences\NC_005104_chr5.gbk#0	173707219	NC_005104.4	-	1401	113985625..113984225	108351136		LOC108351136
LOC102552337	0.001	0.004	0.233	0.001	4.69887	4.69887	246.727	1	Z-011590	LOC102552337	gene		D:\assemblies\Rattus_norvegicus-Rnor_6.0-dbSNP149\Rattus_norvegicus-Rnor_6.0-dbSNP149.genometemplate\sequences\NC_005104_chr5.gbk#0	173707219	NC_005104.4	-	1135	121454003..121452869	102552337, 7559665		LOC102552337
LOC103692427	0.004	0.031	1.265	0.001	8.03341	33.3025	1338.68	4.1455	Z-011593	LOC103692427	gene		D:\assemblies\Rattus_norvegicus-Rnor_6.0-dbSNP149\Rattus_norvegicus-Rnor_6.0-dbSNP149.genometemplate\sequences\NC_005104_chr5.gbk#0	173707219	NC_005104.4	-	49320	122099026..122049707	103692427, 9264036		LOC103692427
LOC108351008	0.003	0.57	0.001	0.146	226.486	3.91351	0.00649345	0.0172793	Z-011618	LOC108351008	gene		D:\assemblies\Rattus_norvegicus-Rnor_6.0-dbSNP149\Rattus_norvegicus-Rnor_6.0-dbSNP149.genometemplate\sequences\NC_005104_chr5.gbk#0	173707219	NC_005104.4	+	25972	125197590..125223561	108351008		LOC108351008
Ldlrad1	0.001	0.01	0.38	0.001	10.1906	10.1906	401.664	1	Z-011645	Ldlrad1	gene		D:\assemblies\Rattus_norvegicus-Rnor_6.0-dbSNP149\Rattus_norvegicus-Rnor_6.0-dbSNP149.genometemplate\sequences\NC_005104_chr5.gbk#0	173707219	NC_005104.4	+	9270	126812168..126821437	689088, 1597398		Ldlrad1
LOC102554672	0.088	0.015	0.756	0.001	0.169901	15.8746	799.662	93.4347	Z-011668	LOC102554672	gene		D:\assemblies\Rattus_norvegicus-Rnor_6.0-dbSNP149\Rattus_norvegicus-Rnor_6.0-dbSNP149.genometemplate\sequences\NC_005104_chr5.gbk#0	173707219	NC_005104.4	-	531	128079561..128079031	102554672, 7738149		LOC102554672
Dmrta2	0.831	0.141	0.001	0.925	0.169871	0.152742	0.00102216	0.899166	Z-011692	Dmrta2	gene		D:\assemblies\Rattus_norvegicus-Rnor_6.0-dbSNP149\Rattus_norvegicus-Rnor_6.0-dbSNP149.genometemplate\sequences\NC_005104_chr5.gbk#0	173707219	NC_005104.4	+	5751	129754295..129760045	313471, 1308173		Dmrta2
Skint1	0.001	0.001	0.125	0.001	1	1	132.272	1	Z-011703	Skint1	gene		D:\assemblies\Rattus_norvegicus-Rnor_6.0-dbSNP149\Rattus_norvegicus-Rnor_6.0-dbSNP149.genometemplate\sequences\NC_005104_chr5.gbk#0	173707219	NC_005104.4	+	29577	131915266..131944842	689801, 1587579		Skint1
Trabd2b	0.069	1.404	0.001	0.906	20.222	1.54906	0.00104271	0.076603	Z-011713	Trabd2b	gene		D:\assemblies\Rattus_norvegicus-Rnor_6.0-dbSNP149\Rattus_norvegicus-Rnor_6.0-dbSNP149.genometemplate\sequences\NC_005104_chr5.gbk#0	173707219	NC_005104.4	+	216166	133220986..133437151	689914, 1586386		Trabd2b
Foxd2	0.048	0.04	0.001	0.247	0.823221	0.160768	0.00381959	0.195291	Z-011716	Foxd2	gene		D:\assemblies\Rattus_norvegicus-Rnor_6.0-dbSNP149\Rattus_norvegicus-Rnor_6.0-dbSNP149.genometemplate\sequences\NC_005104_chr5.gbk#0	173707219	NC_005104.4	-	2993	133710186..133707194	313504, 1304642		Foxd2
Faah	0.073	0.007	7.395	0.001	0.0950109	7.30484	7824.46	76.8842	Z-011727	Faah	gene		D:\assemblies\Rattus_norvegicus-Rnor_6.0-dbSNP149\Rattus_norvegicus-Rnor_6.0-dbSNP149.genometemplate\sequences\NC_005104_chr5.gbk#0	173707219	NC_005104.4	-	19197	134349400..134330204	29347, 61808		Faah
LOC100911581	0.073	0.007	7.395	0.001	0.0950109	7.30484	7824.46	76.8842	Z-011743	LOC100911581	gene		D:\assemblies\Rattus_norvegicus-Rnor_6.0-dbSNP149\Rattus_norvegicus-Rnor_6.0-dbSNP149.genometemplate\sequences\NC_005104_chr5.gbk#0	173707219	NC_005104.4	-	19197	134872095..134852899	100911581, 6491947		LOC100911581
LOC100911669	0.006	0.001	0.252	0.001	0.148217	1	267.094	6.74686	Z-011751	LOC100911669	gene		D:\assemblies\Rattus_norvegicus-Rnor_6.0-dbSNP149\Rattus_norvegicus-Rnor_6.0-dbSNP149.genometemplate\sequences\NC_005104_chr5.gbk#0	173707219	NC_005104.4	+	16803	135029480..135046282	100911669, 6491750		LOC100911669
Mutyh	1.634	3.027	26.056	1.288	1.85274	2.35024	20.2298	1.26852	Z-011765	Mutyh	gene		D:\assemblies\Rattus_norvegicus-Rnor_6.0-dbSNP149\Rattus_norvegicus-Rnor_6.0-dbSNP149.genometemplate\sequences\NC_005104_chr5.gbk#0	173707219	NC_005104.4	+	12021	135663328..135675348	170841, 620045		Mutyh	Myh
LOC103692460	0.047	0.005	0.645	0.001	0.10734	5.34018	682.57	49.7502	Z-011804	LOC103692460	gene		D:\assemblies\Rattus_norvegicus-Rnor_6.0-dbSNP149\Rattus_norvegicus-Rnor_6.0-dbSNP149.genometemplate\sequences\NC_005104_chr5.gbk#0	173707219	NC_005104.4	+	1170	137265071..137266240	103692460, 9354806		LOC103692460
Mpl	4.38	13.253	0.068	4.813	3.02573	2.7533	0.0141006	0.909961	Z-011805	Mpl	gene		D:\assemblies\Rattus_norvegicus-Rnor_6.0-dbSNP149\Rattus_norvegicus-Rnor_6.0-dbSNP149.genometemplate\sequences\NC_005104_chr5.gbk#0	173707219	NC_005104.4	-	13621	137282032..137268412	366455, 1311069		Mpl
Guca2b	0.001	0.001	0.824	0.001	1	1	871.782	1	Z-011857	Guca2b	gene		D:\assemblies\Rattus_norvegicus-Rnor_6.0-dbSNP149\Rattus_norvegicus-Rnor_6.0-dbSNP149.genometemplate\sequences\NC_005104_chr5.gbk#0	173707219	NC_005104.4	-	2051	138697641..138695591	64055, 620044		Guca2b
Slfnl1	0.005	0.001	0.347	0.001	0.1864	1	367.306	5.3648	Z-011864	Slfnl1	gene		D:\assemblies\Rattus_norvegicus-Rnor_6.0-dbSNP149\Rattus_norvegicus-Rnor_6.0-dbSNP149.genometemplate\sequences\NC_005104_chr5.gbk#0	173707219	NC_005104.4	+	5667	139467933..139473599	500540, 1564075		Slfnl1
Gnl2	2.911	5.065	54.359	3.85	1.73966	1.31567	14.1205	0.756278	Z-011933	Gnl2	gene		D:\assemblies\Rattus_norvegicus-Rnor_6.0-dbSNP149\Rattus_norvegicus-Rnor_6.0-dbSNP149.genometemplate\sequences\NC_005104_chr5.gbk#0	173707219	NC_005104.4	+	25449	143027970..143053418	362593, 1305006		Gnl2	RGD1305006
Dlgap3	0.006	0.003	0.036	0.001	0.605583	3.5565	38.5008	5.87286	Z-011973	Dlgap3	gene		D:\assemblies\Rattus_norvegicus-Rnor_6.0-dbSNP149\Rattus_norvegicus-Rnor_6.0-dbSNP149.genometemplate\sequences\NC_005104_chr5.gbk#0	173707219	NC_005104.4	+	69780	145234757..145304536	286923, 708349		Dlgap3	DAP-3, Dap3, SAPAP3
Ptpru	0.042	0.047	0.074	0.001	1.1348	50.2274	78.4413	44.2612	Z-012051	Ptpru	gene		D:\assemblies\Rattus_norvegicus-Rnor_6.0-dbSNP149\Rattus_norvegicus-Rnor_6.0-dbSNP149.genometemplate\sequences\NC_005104_chr5.gbk#0	173707219	NC_005104.4	-	73979	149996352..149922374	116680, 620782		Ptpru
Rhd	16.136	32.738	0.054	19.958	2.02888	1.64037	0.00271591	0.808511	Z-012141	Rhd	gene		D:\assemblies\Rattus_norvegicus-Rnor_6.0-dbSNP149\Rattus_norvegicus-Rnor_6.0-dbSNP149.genometemplate\sequences\NC_005104_chr5.gbk#0	173707219	NC_005104.4	+	34594	153197416..153232009	60414, 620451		Rhd	Rh, Rhced
E2f2	13.199	24.186	1.162	15.028	1.83239	1.60935	0.0773207	0.878279	Z-012173	E2f2	gene		D:\assemblies\Rattus_norvegicus-Rnor_6.0-dbSNP149\Rattus_norvegicus-Rnor_6.0-dbSNP149.genometemplate\sequences\NC_005104_chr5.gbk#0	173707219	NC_005104.4	+	23618	154516611..154540228	684111, 1593939		E2f2
Pla2g2f	0.001	0.005	0.249	0.001	5.33344	5.33344	263.438	1	Z-012221	Pla2g2f	gene		D:\assemblies\Rattus_norvegicus-Rnor_6.0-dbSNP149\Rattus_norvegicus-Rnor_6.0-dbSNP149.genometemplate\sequences\NC_005104_chr5.gbk#0	173707219	NC_005104.4	-	25219	157217265..157192047	690388, 1597305		Pla2g2f
LOC102557514	0.035	0.008	0.821	0.001	0.232129	8.69982	869.075	37.4784	Z-012232	LOC102557514	gene		D:\assemblies\Rattus_norvegicus-Rnor_6.0-dbSNP149\Rattus_norvegicus-Rnor_6.0-dbSNP149.genometemplate\sequences\NC_005104_chr5.gbk#0	173707219	NC_005104.4	-	660	157642737..157642078	102557514, 7727057		LOC102557514
Tas1r2	0.004	0.007	0.041	0.001	1.59842	7.41929	43.8608	4.64164	Z-012244	Tas1r2	gene		D:\assemblies\Rattus_norvegicus-Rnor_6.0-dbSNP149\Rattus_norvegicus-Rnor_6.0-dbSNP149.genometemplate\sequences\NC_005104_chr5.gbk#0	173707219	NC_005104.4	+	15840	158119894..158135733	100270683		Tas1r2	Aldh4a1, Gpr71, Tr2
LOC102546563	0.042	0.042	0.001	0.379	0.998918	0.110676	0.00249238	0.110796	Z-012261	LOC102546563	gene		D:\assemblies\Rattus_norvegicus-Rnor_6.0-dbSNP149\Rattus_norvegicus-Rnor_6.0-dbSNP149.genometemplate\sequences\NC_005104_chr5.gbk#0	173707219	NC_005104.4	-	1368	159396732..159395365	102546563, 7726360		LOC102546563
LOC102546642	0.001	0.011	0.001	0.306	11.8943	0.0367145	0.00308673	0.00308673	Z-012262	LOC102546642	gene		D:\assemblies\Rattus_norvegicus-Rnor_6.0-dbSNP149\Rattus_norvegicus-Rnor_6.0-dbSNP149.genometemplate\sequences\NC_005104_chr5.gbk#0	173707219	NC_005104.4	+	4888	159399199..159404086	102546642, 7706312		LOC102546642
Clcnkb	0.001	0.033	0.206	0.001	34.7272	34.7272	218.174	1	Z-012279	Clcnkb	gene		D:\assemblies\Rattus_norvegicus-Rnor_6.0-dbSNP149\Rattus_norvegicus-Rnor_6.0-dbSNP149.genometemplate\sequences\NC_005104_chr5.gbk#0	173707219	NC_005104.4	-	23193	159973576..159950384	79430, 628639		Clcnkb	ClC-K2L, Clck2, Clcnk1l
LOC102554076	0.001	0.001	0.083	0.001	1	1	87.4457	1	Z-012301	LOC102554076	gene		D:\assemblies\Rattus_norvegicus-Rnor_6.0-dbSNP149\Rattus_norvegicus-Rnor_6.0-dbSNP149.genometemplate\sequences\NC_005104_chr5.gbk#0	173707219	NC_005104.4	+	6824	161251174..161257997	102554076, 7709749		LOC102554076
LOC103692503	0.001	0.001	0.075	0.001	1	1	78.9828	1	Z-012304	LOC103692503	gene		D:\assemblies\Rattus_norvegicus-Rnor_6.0-dbSNP149\Rattus_norvegicus-Rnor_6.0-dbSNP149.genometemplate\sequences\NC_005104_chr5.gbk#0	173707219	NC_005104.4	+	14637	161773906..161788542	103692503, 9275519		LOC103692503
Tnfrsf8	0.001	0.001	0.129	0.001	1	1	136.168	1	Z-012327	Tnfrsf8	gene		D:\assemblies\Rattus_norvegicus-Rnor_6.0-dbSNP149\Rattus_norvegicus-Rnor_6.0-dbSNP149.genometemplate\sequences\NC_005104_chr5.gbk#0	173707219	NC_005104.4	-	45230	163231578..163186349	25069, 3879		Tnfrsf8	Cd30
LOC102550754	0.001	0.006	0.718	0.001	6.25431	6.25431	759.294	1	Z-012332	LOC102550754	gene		D:\assemblies\Rattus_norvegicus-Rnor_6.0-dbSNP149\Rattus_norvegicus-Rnor_6.0-dbSNP149.genometemplate\sequences\NC_005104_chr5.gbk#0	173707219	NC_005104.4	+	823	163558565..163559387	102550754, 7547575		LOC102550754
LOC102551209	0.001	0.006	0.718	0.001	6.25431	6.25431	759.294	1	Z-012335	LOC102551209	gene		D:\assemblies\Rattus_norvegicus-Rnor_6.0-dbSNP149\Rattus_norvegicus-Rnor_6.0-dbSNP149.genometemplate\sequences\NC_005104_chr5.gbk#0	173707219	NC_005104.4	+	823	163712051..163712873	102551209, 7694630		LOC102551209
LOC102551309	0.001	0.02	0.077	0.001	20.9175	20.9175	81.2651	1	Z-012357	LOC102551309	gene		D:\assemblies\Rattus_norvegicus-Rnor_6.0-dbSNP149\Rattus_norvegicus-Rnor_6.0-dbSNP149.genometemplate\sequences\NC_005104_chr5.gbk#0	173707219	NC_005104.4	-	10049	164885606..164875558	102551309, 7658417		LOC102551309
LOC691354	0.001	0.024	0.132	0.001	24.9702	24.9702	139.399	1	Z-012377	LOC691354	gene		D:\assemblies\Rattus_norvegicus-Rnor_6.0-dbSNP149\Rattus_norvegicus-Rnor_6.0-dbSNP149.genometemplate\sequences\NC_005104_chr5.gbk#0	173707219	NC_005104.4	+	26544	165464832..165491375	691354, 1585063		LOC691354
Cort	0.001	0.001	2.357	0.001	1	1	2493.56	1	Z-012383	Cort	gene		D:\assemblies\Rattus_norvegicus-Rnor_6.0-dbSNP149\Rattus_norvegicus-Rnor_6.0-dbSNP149.genometemplate\sequences\NC_005104_chr5.gbk#0	173707219	NC_005104.4	-	1442	165944221..165942780	25305, 2383		Cort
Tnfrsf9	0.006	0.005	6.745	0.001	0.847183	5.4998	7136.65	6.49187	Z-012424	Tnfrsf9	gene		D:\assemblies\Rattus_norvegicus-Rnor_6.0-dbSNP149\Rattus_norvegicus-Rnor_6.0-dbSNP149.genometemplate\sequences\NC_005104_chr5.gbk#0	173707219	NC_005104.4	+	26569	168009245..168035813	500590, 1598208		Tnfrsf9	4-1BB
LOC102549463	0.005	0.004	0.064	0.001	0.801145	4.10161	67.755	5.11969	Z-012456	LOC102549463	gene		D:\assemblies\Rattus_norvegicus-Rnor_6.0-dbSNP149\Rattus_norvegicus-Rnor_6.0-dbSNP149.genometemplate\sequences\NC_005104_chr5.gbk#0	173707219	NC_005104.4	-	11373	170063858..170052486	102549463, 7559930		LOC102549463
LOC102551562	0.001	0.001	0.25	0.001	1	1	264.898	1	Z-012467	LOC102551562	gene		D:\assemblies\Rattus_norvegicus-Rnor_6.0-dbSNP149\Rattus_norvegicus-Rnor_6.0-dbSNP149.genometemplate\sequences\NC_005104_chr5.gbk#0	173707219	NC_005104.4	+	30705	171327670..171358374	102551562, 7631678		LOC102551562
LOC103692525	0.001	0.006	7.187	0.001	5.90832	5.90832	7603.96	1	Z-012482	LOC103692525	gene		D:\assemblies\Rattus_norvegicus-Rnor_6.0-dbSNP149\Rattus_norvegicus-Rnor_6.0-dbSNP149.genometemplate\sequences\NC_005104_chr5.gbk#0	173707219	NC_005104.4	-	871	172327296..172326426	103692525, 9190664		LOC103692525
Tnfrsf14	2.044	5.706	40.182	3.294	2.7909	1.73198	12.1966	0.620579	Z-012483	Tnfrsf14	gene		D:\assemblies\Rattus_norvegicus-Rnor_6.0-dbSNP149\Rattus_norvegicus-Rnor_6.0-dbSNP149.genometemplate\sequences\NC_005104_chr5.gbk#0	173707219	NC_005104.4	-	8963	172337221..172328259	366518, 1310115		Tnfrsf14
Ccnl2	2.274	3.326	40.574	3.191	1.46263	1.04224	12.7142	0.712584	Z-012515	Ccnl2	gene		D:\assemblies\Rattus_norvegicus-Rnor_6.0-dbSNP149\Rattus_norvegicus-Rnor_6.0-dbSNP149.genometemplate\sequences\NC_005104_chr5.gbk#0	173707219	NC_005104.4	+	11979	173256301..173268279	298686, 1309149		Ccnl2
B3galt6	0.422	0.069	0.001	0.261	0.163005	0.264345	0.00362802	1.6217	Z-012527	B3galt6	gene		D:\assemblies\Rattus_norvegicus-Rnor_6.0-dbSNP149\Rattus_norvegicus-Rnor_6.0-dbSNP149.genometemplate\sequences\NC_005104_chr5.gbk#0	173707219	NC_005104.4	-	2137	173425611..173423475	298690, 1309558		B3galt6
Tnfrsf4	0.006	0.001	13.056	0.001	0.16142	1	13813.5	6.19503	Z-012529	Tnfrsf4	gene		D:\assemblies\Rattus_norvegicus-Rnor_6.0-dbSNP149\Rattus_norvegicus-Rnor_6.0-dbSNP149.genometemplate\sequences\NC_005104_chr5.gbk#0	173707219	NC_005104.4	+	2691	173447784..173450474	25572, 3920		Tnfrsf4	Ox40, Txgp1
RGD1311517	0.035	0.009	0.48	0.001	0.253895	9.43992	507.706	37.1804	Z-012537	RGD1311517	gene		D:\assemblies\Rattus_norvegicus-Rnor_6.0-dbSNP149\Rattus_norvegicus-Rnor_6.0-dbSNP149.genometemplate\sequences\NC_005104_chr5.gbk#0	173707219	NC_005104.4	+	17704	173542058..173559761	313775, 1311517		RGD1311517
LOC103692535	0.004	0.004	0.138	0.001	0.907763	3.7655	145.94	4.14811	Z-012586	LOC103692535	gene		D:\assemblies\Rattus_norvegicus-Rnor_6.0-dbSNP149\Rattus_norvegicus-Rnor_6.0-dbSNP149.genometemplate\sequences\NC_005105_chr6.gbk#0	147991367	NC_005105.4	-	3122	3390883..3387762	103692535, 9403317		LOC103692535
LOC102551952	0.195	0.939	0.001	0.321	4.81029	2.93078	0.00294844	0.609272	Z-012590	LOC102551952	gene		D:\assemblies\Rattus_norvegicus-Rnor_6.0-dbSNP149\Rattus_norvegicus-Rnor_6.0-dbSNP149.genometemplate\sequences\NC_005105_chr6.gbk#0	147991367	NC_005105.4	+	8022	3631238..3639259	102551952, 7629169		LOC102551952
LOC103692545	0.001	0.008	0.186	0.001	8.52128	8.52128	196.305	1	Z-012615	LOC103692545	gene		D:\assemblies\Rattus_norvegicus-Rnor_6.0-dbSNP149\Rattus_norvegicus-Rnor_6.0-dbSNP149.genometemplate\sequences\NC_005105_chr6.gbk#0	147991367	NC_005105.4	-	1478	6744831..6743354	103692545, 9459711		LOC103692545
Abcg5	0.001	0.008	0.346	0.001	8.78105	8.78105	365.637	1	Z-012629	Abcg5	gene		D:\assemblies\Rattus_norvegicus-Rnor_6.0-dbSNP149\Rattus_norvegicus-Rnor_6.0-dbSNP149.genometemplate\sequences\NC_005105_chr6.gbk#0	147991367	NC_005105.4	-	25437	7961207..7935771	114628, 620298		Abcg5
LOC108351169	0.013	0.264	0.034	0.001	20.7463	279.385	36.1626	13.4667	Z-012645	LOC108351169	gene		D:\assemblies\Rattus_norvegicus-Rnor_6.0-dbSNP149\Rattus_norvegicus-Rnor_6.0-dbSNP149.genometemplate\sequences\NC_005105_chr6.gbk#0	147991367	NC_005105.4	-	10851	9140821..9129971	108351169		LOC108351169
Atp6v1e2	0.004	0.02	0.203	0.001	5.65747	21.2174	215.047	3.75033	Z-012656	Atp6v1e2	gene		D:\assemblies\Rattus_norvegicus-Rnor_6.0-dbSNP149\Rattus_norvegicus-Rnor_6.0-dbSNP149.genometemplate\sequences\NC_005105_chr6.gbk#0	147991367	NC_005105.4	-	6690	10517059..10510370	366545, 1311680		Atp6v1e2
LOC103692551	0.001	0.481	0.454	0.001	508.567	508.567	479.84	1	Z-012662	LOC103692551	gene		D:\assemblies\Rattus_norvegicus-Rnor_6.0-dbSNP149\Rattus_norvegicus-Rnor_6.0-dbSNP149.genometemplate\sequences\NC_005105_chr6.gbk#0	147991367	NC_005105.4	-	1969	10671264..10669296	103692551, 9406116		LOC103692551
LOC681766	0.001	0.001	0.182	0.001	1	1	192.403	1	Z-012668	LOC681766	gene		D:\assemblies\Rattus_norvegicus-Rnor_6.0-dbSNP149\Rattus_norvegicus-Rnor_6.0-dbSNP149.genometemplate\sequences\NC_005105_chr6.gbk#0	147991367	NC_005105.4	-	48914	11063509..11014596	681766, 1591638		LOC681766
Galnt14	0.001	0.001	0.412	0.001	1	1	435.768	1	Z-012756	Galnt14	gene		D:\assemblies\Rattus_norvegicus-Rnor_6.0-dbSNP149\Rattus_norvegicus-Rnor_6.0-dbSNP149.genometemplate\sequences\NC_005105_chr6.gbk#0	147991367	NC_005105.4	-	215404	24985711..24770308	313878, 1310068		Galnt14
Xdh	15.938	17.989	1.488	18.629	1.12871	0.965637	0.0798685	0.855522	Z-012758	Xdh	gene		D:\assemblies\Rattus_norvegicus-Rnor_6.0-dbSNP149\Rattus_norvegicus-Rnor_6.0-dbSNP149.genometemplate\sequences\NC_005105_chr6.gbk#0	147991367	NC_005105.4	-	61704	25211273..25149570	497811, 62043		Xdh	XOR
Krtcap3	0.001	0.001	1.843	0.001	1	1	1950.49	1	Z-012777	Krtcap3	gene		D:\assemblies\Rattus_norvegicus-Rnor_6.0-dbSNP149\Rattus_norvegicus-Rnor_6.0-dbSNP149.genometemplate\sequences\NC_005105_chr6.gbk#0	147991367	NC_005105.4	-	1570	26486695..26485126	683980, 1596516		Krtcap3
Mfsd2b	2.018	3.402	0.001	2.196	1.68562	1.54903	0.000430378	0.918965	Z-012837	Mfsd2b	gene		D:\assemblies\Rattus_norvegicus-Rnor_6.0-dbSNP149\Rattus_norvegicus-Rnor_6.0-dbSNP149.genometemplate\sequences\NC_005105_chr6.gbk#0	147991367	NC_005105.4	-	12091	28968245..28956155	500624, 1561716		Mfsd2b
Fam228b	0.004	0.008	0.576	0.001	1.82025	8.07646	609.935	4.43701	Z-012848	Fam228b	gene		D:\assemblies\Rattus_norvegicus-Rnor_6.0-dbSNP149\Rattus_norvegicus-Rnor_6.0-dbSNP149.genometemplate\sequences\NC_005105_chr6.gbk#0	147991367	NC_005105.4	+	32401	30037995..30070395	100363146, 2324744		Fam228b
LOC257642	341.642	1382.98	31458.9	281.278	4.04802	4.91675	111.843	1.21461	Z-012853	LOC257642	gene		D:\assemblies\Rattus_norvegicus-Rnor_6.0-dbSNP149\Rattus_norvegicus-Rnor_6.0-dbSNP149.genometemplate\sequences\NC_005105_chr6.gbk#0	147991367	NC_005105.4	-	489	30639289..30638801	257642, 727924		LOC257642	ribin
Vsnl1	1.372	0.211	0.001	1.068	0.153885	0.197778	0.00088525	1.28523	Z-012898	Vsnl1	gene		D:\assemblies\Rattus_norvegicus-Rnor_6.0-dbSNP149\Rattus_norvegicus-Rnor_6.0-dbSNP149.genometemplate\sequences\NC_005105_chr6.gbk#0	147991367	NC_005105.4	-	120610	37121969..37001360	24877, 3966		Vsnl1	Nvp1, Ratnvp1
LOC108351208	0.001	0.017	0.251	0.001	18.2338	18.2338	265.708	1	Z-012917	LOC108351208	gene		D:\assemblies\Rattus_norvegicus-Rnor_6.0-dbSNP149\Rattus_norvegicus-Rnor_6.0-dbSNP149.genometemplate\sequences\NC_005105_chr6.gbk#0	147991367	NC_005105.4	-	9494	41034056..41024563	108351208		LOC108351208
Greb1	0.003	0.005	0.036	0.001	1.50884	4.84929	38.0067	3.21393	Z-012925	Greb1	gene		D:\assemblies\Rattus_norvegicus-Rnor_6.0-dbSNP149\Rattus_norvegicus-Rnor_6.0-dbSNP149.genometemplate\sequences\NC_005105_chr6.gbk#0	147991367	NC_005105.4	-	69830	42002770..41932941	500633, 1564091		Greb1
Cmpk2	3.953	6.284	0.721	5.844	1.5895	1.07531	0.123303	0.676511	Z-012966	Cmpk2	gene		D:\assemblies\Rattus_norvegicus-Rnor_6.0-dbSNP149\Rattus_norvegicus-Rnor_6.0-dbSNP149.genometemplate\sequences\NC_005105_chr6.gbk#0	147991367	NC_005105.4	+	11583	45683242..45694824	314004, 1305881		Cmpk2	Tyki
Colec11	0.001	0.001	0.202	0.001	1	1	213.442	1	Z-012980	Colec11	gene		D:\assemblies\Rattus_norvegicus-Rnor_6.0-dbSNP149\Rattus_norvegicus-Rnor_6.0-dbSNP149.genometemplate\sequences\NC_005105_chr6.gbk#0	147991367	NC_005105.4	-	32195	47889961..47857767	366588, 1309678		Colec11
LOC102547240	0.001	0.001	0.269	0.001	1	1	285.061	1	Z-012983	LOC102547240	gene		D:\assemblies\Rattus_norvegicus-Rnor_6.0-dbSNP149\Rattus_norvegicus-Rnor_6.0-dbSNP149.genometemplate\sequences\NC_005105_chr6.gbk#0	147991367	NC_005105.4	+	7066	47929274..47936339	102547240, 7678865		LOC102547240
LOC102555048	0.001	0.003	0.044	0.001	3.43513	3.43513	46.7368	1	Z-013001	LOC102555048	gene		D:\assemblies\Rattus_norvegicus-Rnor_6.0-dbSNP149\Rattus_norvegicus-Rnor_6.0-dbSNP149.genometemplate\sequences\NC_005105_chr6.gbk#0	147991367	NC_005105.4	-	89889	50370748..50280860	102555048, 7502861		LOC102555048
LOC102555103	0.001	0.001	0.078	0.001	1	1	82.4168	1	Z-013002	LOC102555103	gene		D:\assemblies\Rattus_norvegicus-Rnor_6.0-dbSNP149\Rattus_norvegicus-Rnor_6.0-dbSNP149.genometemplate\sequences\NC_005105_chr6.gbk#0	147991367	NC_005105.4	-	9961	50388066..50378106	102555103, 7747059		LOC102555103
Slc26a3	0.019	0.006	0.001	0.112	0.327328	0.0551688	0.00843571	0.168543	Z-013005	Slc26a3	gene		D:\assemblies\Rattus_norvegicus-Rnor_6.0-dbSNP149\Rattus_norvegicus-Rnor_6.0-dbSNP149.genometemplate\sequences\NC_005105_chr6.gbk#0	147991367	NC_005105.4	+	41222	50725085..50766306	114629, 620623		Slc26a3
LOC102553990	0.001	0.001	0.131	0.001	1	1	139.123	1	Z-013075	LOC102553990	gene		D:\assemblies\Rattus_norvegicus-Rnor_6.0-dbSNP149\Rattus_norvegicus-Rnor_6.0-dbSNP149.genometemplate\sequences\NC_005105_chr6.gbk#0	147991367	NC_005105.4	-	32001	64152399..64120399	102553990, 7544796		LOC102553990
LOC102557478	0.001	0.001	0.014	0.001	1	1	14.6092	1	Z-013100	LOC102557478	gene		D:\assemblies\Rattus_norvegicus-Rnor_6.0-dbSNP149\Rattus_norvegicus-Rnor_6.0-dbSNP149.genometemplate\sequences\NC_005105_chr6.gbk#0	147991367	NC_005105.4	-	119706	71853649..71733944	102557478, 7728058		LOC102557478
LOC102547890	0.007	0.001	2.465	0.001	0.140373	1	2607.87	7.12389	Z-013122	LOC102547890	gene		D:\assemblies\Rattus_norvegicus-Rnor_6.0-dbSNP149\Rattus_norvegicus-Rnor_6.0-dbSNP149.genometemplate\sequences\NC_005105_chr6.gbk#0	147991367	NC_005105.4	-	4315	75228553..75224239	102547890, 7578757		LOC102547890
Fam177a1	0.905	0.081	14.185	0.607	0.0891514	0.132959	23.384	1.49138	Z-013135	Fam177a1	gene		D:\assemblies\Rattus_norvegicus-Rnor_6.0-dbSNP149\Rattus_norvegicus-Rnor_6.0-dbSNP149.genometemplate\sequences\NC_005105_chr6.gbk#0	147991367	NC_005105.4	+	14833	76041080..76055912	100359558, 2323636		Fam177a1
LOC108351237	2.234	11.504	64.687	3.069	5.15059	3.74827	21.0765	0.727736	Z-013139	LOC108351237	gene		D:\assemblies\Rattus_norvegicus-Rnor_6.0-dbSNP149\Rattus_norvegicus-Rnor_6.0-dbSNP149.genometemplate\sequences\NC_005105_chr6.gbk#0	147991367	NC_005105.4	+	8719	76258774..76267492	108351237		LOC108351237
Insm2	0.034	1.336	0.001	0.196	38.7413	6.81849	0.00482211	0.176001	Z-013143	Insm2	gene		D:\assemblies\Rattus_norvegicus-Rnor_6.0-dbSNP149\Rattus_norvegicus-Rnor_6.0-dbSNP149.genometemplate\sequences\NC_005105_chr6.gbk#0	147991367	NC_005105.4	+	5560	76380681..76386240	314131, 1306949		Insm2
Slc25a21	1.224	0.278	0.001	1.794	0.226864	0.15474	0.000526813	0.682083	Z-013159	Slc25a21	gene		D:\assemblies\Rattus_norvegicus-Rnor_6.0-dbSNP149\Rattus_norvegicus-Rnor_6.0-dbSNP149.genometemplate\sequences\NC_005105_chr6.gbk#0	147991367	NC_005105.4	-	496956	78121339..77624384	171151, 621444		Slc25a21	Odc1
LOC102552151	0.003	0.005	0.001	0.053	1.7468	0.0990314	0.0178604	0.056693	Z-013162	LOC102552151	gene		D:\assemblies\Rattus_norvegicus-Rnor_6.0-dbSNP149\Rattus_norvegicus-Rnor_6.0-dbSNP149.genometemplate\sequences\NC_005105_chr6.gbk#0	147991367	NC_005105.4	-	3144	78116143..78113000	102552151, 7647113		LOC102552151
LOC103692649	0.001	0.001	0.093	0.001	1	1	98.6356	1	Z-013224	LOC103692649	gene		D:\assemblies\Rattus_norvegicus-Rnor_6.0-dbSNP149\Rattus_norvegicus-Rnor_6.0-dbSNP149.genometemplate\sequences\NC_005105_chr6.gbk#0	147991367	NC_005105.4	+	6802	91867496..91874297	103692649, 9347219		LOC103692649
LOC102552313	0.001	0.006	0.191	0.001	6.37461	6.37461	202.206	1	Z-013246	LOC102552313	gene		D:\assemblies\Rattus_norvegicus-Rnor_6.0-dbSNP149\Rattus_norvegicus-Rnor_6.0-dbSNP149.genometemplate\sequences\NC_005105_chr6.gbk#0	147991367	NC_005105.4	-	5278	93422827..93417550	102552313, 7574462		LOC102552313
Kcnh5	0.001	0.005	0.051	0.001	5.58557	5.58557	53.9837	1	Z-013300	Kcnh5	gene		D:\assemblies\Rattus_norvegicus-Rnor_6.0-dbSNP149\Rattus_norvegicus-Rnor_6.0-dbSNP149.genometemplate\sequences\NC_005105_chr6.gbk#0	147991367	NC_005105.4	-	284257	98157087..97872831	171146, 621417		Kcnh5	Eag2
Akap5	0.001	0.005	0.211	0.001	5.29277	5.29277	223.088	1	Z-013311	Akap5	gene		D:\assemblies\Rattus_norvegicus-Rnor_6.0-dbSNP149\Rattus_norvegicus-Rnor_6.0-dbSNP149.genometemplate\sequences\NC_005105_chr6.gbk#0	147991367	NC_005105.4	+	5401	99356509..99361909	171026, 620829		Akap5	AKAP150, Akap79, P150
Rab15	0.009	0.013	0.001	1.196	1.46436	0.0107076	0.000790152	0.00731217	Z-013325	Rab15	gene		D:\assemblies\Rattus_norvegicus-Rnor_6.0-dbSNP149\Rattus_norvegicus-Rnor_6.0-dbSNP149.genometemplate\sequences\NC_005105_chr6.gbk#0	147991367	NC_005105.4	-	24369	99870320..99845952	299156, 735172		Rab15
Fam71d	0.001	0.001	0.033	0.001	1	1	35.3985	1	Z-013337	Fam71d	gene		D:\assemblies\Rattus_norvegicus-Rnor_6.0-dbSNP149\Rattus_norvegicus-Rnor_6.0-dbSNP149.genometemplate\sequences\NC_005105_chr6.gbk#0	147991367	NC_005105.4	+	45746	101864567..101910312	366671, 1564393		Fam71d
Galnt16	0.224	0.005	0.001	0.219	0.024258	0.0247821	0.00431344	1.02161	Z-013374	Galnt16	gene		D:\assemblies\Rattus_norvegicus-Rnor_6.0-dbSNP149\Rattus_norvegicus-Rnor_6.0-dbSNP149.genometemplate\sequences\NC_005105_chr6.gbk#0	147991367	NC_005105.4	+	180325	104069853..104250177	362760, 1310202		Galnt16	Galntl1
Vash1	3.534	0.418	0.092	6.586	0.11825	0.0634474	0.0139425	0.536553	Z-013479	Vash1	gene		D:\assemblies\Rattus_norvegicus-Rnor_6.0-dbSNP149\Rattus_norvegicus-Rnor_6.0-dbSNP149.genometemplate\sequences\NC_005105_chr6.gbk#0	147991367	NC_005105.4	+	16566	110624377..110640942	503052, 1564082		Vash1
LOC108351280	0.001	0.04	0.001	0.17	42.6231	0.236449	0.00554743	0.00554743	Z-013484	LOC108351280	gene		D:\assemblies\Rattus_norvegicus-Rnor_6.0-dbSNP149\Rattus_norvegicus-Rnor_6.0-dbSNP149.genometemplate\sequences\NC_005105_chr6.gbk#0	147991367	NC_005105.4	+	4163	110889152..110893314	108351280		LOC108351280
Nrxn3	0.004	0.026	0.05	0.001	6.26019	27.7878	52.8791	4.43882	Z-013511	Nrxn3	gene		D:\assemblies\Rattus_norvegicus-Rnor_6.0-dbSNP149\Rattus_norvegicus-Rnor_6.0-dbSNP149.genometemplate\sequences\NC_005105_chr6.gbk#0	147991367	NC_005105.4	+	1936386	112133204..114069589	116508, 620212		Nrxn3
LOC103692689	0.001	0.001	0.02	0.001	1	1	21.3666	1	Z-013552	LOC103692689	gene		D:\assemblies\Rattus_norvegicus-Rnor_6.0-dbSNP149\Rattus_norvegicus-Rnor_6.0-dbSNP149.genometemplate\sequences\NC_005105_chr6.gbk#0	147991367	NC_005105.4	+	12575	123322105..123334679	103692689, 9331236		LOC103692689
LOC102548124	0.006	0.035	0.22	0.001	6.13661	36.5671	232.47	5.95884	Z-013586	LOC102548124	gene		D:\assemblies\Rattus_norvegicus-Rnor_6.0-dbSNP149\Rattus_norvegicus-Rnor_6.0-dbSNP149.genometemplate\sequences\NC_005105_chr6.gbk#0	147991367	NC_005105.4	+	11664	126330696..126342359	102548124, 7543021		LOC102548124
Asb2	0.555	0.122	19.186	0.673	0.219429	0.180841	28.5148	0.824144	Z-013604	Asb2	gene		D:\assemblies\Rattus_norvegicus-Rnor_6.0-dbSNP149\Rattus_norvegicus-Rnor_6.0-dbSNP149.genometemplate\sequences\NC_005105_chr6.gbk#0	147991367	NC_005105.4	-	36127	127248451..127212325	299266, 1306414		Asb2
Serpina1f	0.001	0.001	0.107	0.001	1	1	112.931	1	Z-013615	Serpina1f	gene		D:\assemblies\Rattus_norvegicus-Rnor_6.0-dbSNP149\Rattus_norvegicus-Rnor_6.0-dbSNP149.genometemplate\sequences\NC_005105_chr6.gbk#0	147991367	NC_005105.4	-	6206	127571016..127564811	314406, 1307899		Serpina1f	RGD1307899
LOC100912305	0.001	0.011	7.07	0.001	11.2069	11.2069	7480.29	1	Z-013642	LOC100912305	gene		D:\assemblies\Rattus_norvegicus-Rnor_6.0-dbSNP149\Rattus_norvegicus-Rnor_6.0-dbSNP149.genometemplate\sequences\NC_005105_chr6.gbk#0	147991367	NC_005105.4	-	1690	128750428..128748739	100912305, 6487638		LOC100912305
Glrx5	84.262	203.672	9.834	97.667	2.41714	2.08537	0.100684	0.862742	Z-013643	Glrx5	gene		D:\assemblies\Rattus_norvegicus-Rnor_6.0-dbSNP149\Rattus_norvegicus-Rnor_6.0-dbSNP149.genometemplate\sequences\NC_005105_chr6.gbk#0	147991367	NC_005105.4	+	10378	128750503..128760880	362776, 1308383		Glrx5	RGD1308383
LOC102550757	1.901	4.695	0.001	2.193	2.47027	2.14082	0.000430969	0.866632	Z-013658	LOC102550757	gene		D:\assemblies\Rattus_norvegicus-Rnor_6.0-dbSNP149\Rattus_norvegicus-Rnor_6.0-dbSNP149.genometemplate\sequences\NC_005105_chr6.gbk#0	147991367	NC_005105.4	-	2989	129282827..129279839	102550757, 7729657		LOC102550757
LOC102555052	0.001	0.003	0.072	0.001	3.51423	3.51423	76.3761	1	Z-013685	LOC102555052	gene		D:\assemblies\Rattus_norvegicus-Rnor_6.0-dbSNP149\Rattus_norvegicus-Rnor_6.0-dbSNP149.genometemplate\sequences\NC_005105_chr6.gbk#0	147991367	NC_005105.4	-	28307	132551389..132523083	102555052, 7576094		LOC102555052
Wdr25	0.893	0.844	6.556	0.541	0.944743	1.55995	12.1167	1.65119	Z-013694	Wdr25	gene		D:\assemblies\Rattus_norvegicus-Rnor_6.0-dbSNP149\Rattus_norvegicus-Rnor_6.0-dbSNP149.genometemplate\sequences\NC_005105_chr6.gbk#0	147991367	NC_005105.4	+	129928	132802327..132932254	314443, 1562505		Wdr25	RGD1562505, RGD1565864, Wdr25l
Amn	0.001	0.001	0.448	0.001	1	1	474.454	1	Z-013787	Amn	gene		D:\assemblies\Rattus_norvegicus-Rnor_6.0-dbSNP149\Rattus_norvegicus-Rnor_6.0-dbSNP149.genometemplate\sequences\NC_005105_chr6.gbk#0	147991367	NC_005105.4	+	7442	135724455..135731896	314459, 1308634		Amn
RGD1560608	0.001	0.001	2.71	0.001	1	1	2867.62	1	Z-013789	RGD1560608	gene		D:\assemblies\Rattus_norvegicus-Rnor_6.0-dbSNP149\Rattus_norvegicus-Rnor_6.0-dbSNP149.genometemplate\sequences\NC_005105_chr6.gbk#0	147991367	NC_005105.4	+	4842	135856218..135861059	500724, 1560608		RGD1560608
Zfyve21	16.472	40.926	2.092	22.166	2.48454	1.84634	0.0943859	0.743131	Z-013808	Zfyve21	gene		D:\assemblies\Rattus_norvegicus-Rnor_6.0-dbSNP149\Rattus_norvegicus-Rnor_6.0-dbSNP149.genometemplate\sequences\NC_005105_chr6.gbk#0	147991367	NC_005105.4	+	19843	136380968..136400810	362789, 1311036		Zfyve21
LOC102546876	1.34	2.663	892.837	1.91	1.98681	1.39381	467.349	0.701531	Z-013851	LOC102546876	gene		D:\assemblies\Rattus_norvegicus-Rnor_6.0-dbSNP149\Rattus_norvegicus-Rnor_6.0-dbSNP149.genometemplate\sequences\NC_005105_chr6.gbk#0	147991367	NC_005105.4	-	8683	138100708..138092026	102546876		LOC102546876
LOC103692723	5.312	6.11	73.421	4.625	1.15018	1.32103	15.8748	1.14854	Z-013853	LOC103692723	gene		D:\assemblies\Rattus_norvegicus-Rnor_6.0-dbSNP149\Rattus_norvegicus-Rnor_6.0-dbSNP149.genometemplate\sequences\NC_005105_chr6.gbk#0	147991367	NC_005105.4	-	7920	138154807..138146888	103692723		LOC103692723
LOC362795	0.635	0.007	161.452	0.52	0.0109457	0.0133632	310.571	1.22086	Z-013854	LOC362795	gene		D:\assemblies\Rattus_norvegicus-Rnor_6.0-dbSNP149\Rattus_norvegicus-Rnor_6.0-dbSNP149.genometemplate\sequences\NC_005105_chr6.gbk#0	147991367	NC_005105.4	-	9405	138201560..138192156	362795, 1560407		LOC362795
LOC103695322	0.482	0.001	35.52	0.001	0.00196249	1	37581.9	509.556	Z-013855	LOC103695322	gene		D:\assemblies\Rattus_norvegicus-Rnor_6.0-dbSNP149\Rattus_norvegicus-Rnor_6.0-dbSNP149.genometemplate\sequences\NC_005105_chr6.gbk#0	147991367	NC_005105.4	-	23794	138248758..138224965	103695322		LOC103695322
Adam6	0.001	0.056	0.81	0.001	59.2704	59.2704	857.112	1	Z-013858	Adam6	gene		D:\assemblies\Rattus_norvegicus-Rnor_6.0-dbSNP149\Rattus_norvegicus-Rnor_6.0-dbSNP149.genometemplate\sequences\NC_005105_chr6.gbk#0	147991367	NC_005105.4	+	2489	138432550..138435038	192271, 621472		Adam6	TMDCIV
LOC691801	0.012	0.001	1.318	0.001	0.0761168	1	1394.1	13.1377	Z-013918	LOC691801	gene		D:\assemblies\Rattus_norvegicus-Rnor_6.0-dbSNP149\Rattus_norvegicus-Rnor_6.0-dbSNP149.genometemplate\sequences\NC_005105_chr6.gbk#0	147991367	NC_005105.4	-	626	140587583..140586958	691801		LOC691801
LOC100359993	0.001	0.055	0.786	0.001	58.2483	58.2483	831.185	1	Z-013920	LOC100359993	gene		D:\assemblies\Rattus_norvegicus-Rnor_6.0-dbSNP149\Rattus_norvegicus-Rnor_6.0-dbSNP149.genometemplate\sequences\NC_005105_chr6.gbk#0	147991367	NC_005105.4	-	840	140642302..140641463	100359993, 2323052		LOC100359993
LOC299411	0.008	0.001	0.414	0.001	0.123563	1	437.622	8.09306	Z-013923	LOC299411	gene		D:\assemblies\Rattus_norvegicus-Rnor_6.0-dbSNP149\Rattus_norvegicus-Rnor_6.0-dbSNP149.genometemplate\sequences\NC_005105_chr6.gbk#0	147991367	NC_005105.4	-	574	140753017..140752444	299411		LOC299411
LOC102555711	0.001	0.001	1.389	0.001	1	1	1469.74	1	Z-013924	LOC102555711	gene		D:\assemblies\Rattus_norvegicus-Rnor_6.0-dbSNP149\Rattus_norvegicus-Rnor_6.0-dbSNP149.genometemplate\sequences\NC_005105_chr6.gbk#0	147991367	NC_005105.4	-	483	140788626..140788144	102555711		LOC102555711
LOC100360610	0.001	0.001	1.467	0.001	1	1	1552.25	1	Z-013927	LOC100360610	gene		D:\assemblies\Rattus_norvegicus-Rnor_6.0-dbSNP149\Rattus_norvegicus-Rnor_6.0-dbSNP149.genometemplate\sequences\NC_005105_chr6.gbk#0	147991367	NC_005105.4	-	622	140936936..140936315	100360610, 2321747		LOC100360610
LOC314509	0.001	0.001	0.644	0.001	1	1	680.881	1	Z-013929	LOC314509	gene		D:\assemblies\Rattus_norvegicus-Rnor_6.0-dbSNP149\Rattus_norvegicus-Rnor_6.0-dbSNP149.genometemplate\sequences\NC_005105_chr6.gbk#0	147991367	NC_005105.4	-	577	141008650..141008074	314509, 1564475		LOC314509
LOC102556469	0.001	0.001	0.981	0.001	1	1	1037.85	1	Z-013942	LOC102556469	gene		D:\assemblies\Rattus_norvegicus-Rnor_6.0-dbSNP149\Rattus_norvegicus-Rnor_6.0-dbSNP149.genometemplate\sequences\NC_005105_chr6.gbk#0	147991367	NC_005105.4	-	888	141488333..141487446	102556469		LOC102556469
RGD1565133	0.001	0.011	0.509	0.001	11.13	11.13	538.136	1	Z-013943	RGD1565133	gene		D:\assemblies\Rattus_norvegicus-Rnor_6.0-dbSNP149\Rattus_norvegicus-Rnor_6.0-dbSNP149.genometemplate\sequences\NC_005105_chr6.gbk#0	147991367	NC_005105.4	-	490	141577190..141576701	503084, 1565133		RGD1565133
LOC691890	0.006	0.001	0.79	0.001	0.156945	1	836.057	6.37166	Z-013952	LOC691890	gene		D:\assemblies\Rattus_norvegicus-Rnor_6.0-dbSNP149\Rattus_norvegicus-Rnor_6.0-dbSNP149.genometemplate\sequences\NC_005105_chr6.gbk#0	147991367	NC_005105.4	-	513	142060227..142059715	691890		LOC691890
LOC691919	0.001	1.964	0.001	0.442	2078.14	4.4422	0.00213759	0.00213759	Z-013960	LOC691919	gene		D:\assemblies\Rattus_norvegicus-Rnor_6.0-dbSNP149\Rattus_norvegicus-Rnor_6.0-dbSNP149.genometemplate\sequences\NC_005105_chr6.gbk#0	147991367	NC_005105.4	-	518	142479986..142479469	691919, 1593361		LOC691919
LOC102547474	0.001	0.001	0.383	0.001	1	1	405.176	1	Z-013975	LOC102547474	gene		D:\assemblies\Rattus_norvegicus-Rnor_6.0-dbSNP149\Rattus_norvegicus-Rnor_6.0-dbSNP149.genometemplate\sequences\NC_005105_chr6.gbk#0	147991367	NC_005105.4	-	511	142933152..142932642	102547474		LOC102547474
LOC691955	0.001	0.001	0.381	0.001	1	1	403.009	1	Z-013983	LOC691955	gene		D:\assemblies\Rattus_norvegicus-Rnor_6.0-dbSNP149\Rattus_norvegicus-Rnor_6.0-dbSNP149.genometemplate\sequences\NC_005105_chr6.gbk#0	147991367	NC_005105.4	-	471	143496294..143495824	691955		LOC691955
LOC682313	0.001	0.009	0.782	0.001	9.54257	9.54257	827.054	1	Z-013990	LOC682313	gene		D:\assemblies\Rattus_norvegicus-Rnor_6.0-dbSNP149\Rattus_norvegicus-Rnor_6.0-dbSNP149.genometemplate\sequences\NC_005105_chr6.gbk#0	147991367	NC_005105.4	-	16578	143750050..143733473	682313		LOC682313
RGD1563587	0.001	0.009	0.782	0.001	9.54257	9.54257	827.054	1	Z-013991	RGD1563587	gene		D:\assemblies\Rattus_norvegicus-Rnor_6.0-dbSNP149\Rattus_norvegicus-Rnor_6.0-dbSNP149.genometemplate\sequences\NC_005105_chr6.gbk#0	147991367	NC_005105.4	-	502	143757113..143756612	299551, 1563587		RGD1563587
LOC103692741	0.001	0.2	0.452	0.001	211.713	211.713	477.749	1	Z-013992	LOC103692741	gene		D:\assemblies\Rattus_norvegicus-Rnor_6.0-dbSNP149\Rattus_norvegicus-Rnor_6.0-dbSNP149.genometemplate\sequences\NC_005105_chr6.gbk#0	147991367	NC_005105.4	-	452	143769110..143768659	103692741		LOC103692741
Zfp386	1.938	3.893	67.578	2.581	2.00863	1.50866	26.1877	0.751088	Z-013994	Zfp386	gene		D:\assemblies\Rattus_norvegicus-Rnor_6.0-dbSNP149\Rattus_norvegicus-Rnor_6.0-dbSNP149.genometemplate\sequences\NC_005105_chr6.gbk#0	147991367	NC_005105.4	+	14715	143901239..143915953	25165, 2985		Zfp386	Kzf1, Znf386
Itgb8	0.001	0.244	0.094	0.001	258.361	258.361	99.8286	1	Z-014016	Itgb8	gene		D:\assemblies\Rattus_norvegicus-Rnor_6.0-dbSNP149\Rattus_norvegicus-Rnor_6.0-dbSNP149.genometemplate\sequences\NC_005105_chr6.gbk#0	147991367	NC_005105.4	-	83567	147172846..147089280	362800, 1311374		Itgb8
LOC103692761	0.001	0.006	0.245	0.001	5.97982	5.97982	259.323	1	Z-014053	LOC103692761	gene		D:\assemblies\Rattus_norvegicus-Rnor_6.0-dbSNP149\Rattus_norvegicus-Rnor_6.0-dbSNP149.genometemplate\sequences\NC_005106_chr7.gbk#0	145729302	NC_005106.4	-	5428	2519079..2513652	103692761, 9268095		LOC103692761
Dgka	1.615	2.628	216.235	2.383	1.62688	1.10283	90.7558	0.677884	Z-014090	Dgka	gene		D:\assemblies\Rattus_norvegicus-Rnor_6.0-dbSNP149\Rattus_norvegicus-Rnor_6.0-dbSNP149.genometemplate\sequences\NC_005106_chr7.gbk#0	145729302	NC_005106.4	-	26939	3170764..3143826	140866, 70904		Dgka	Dagk1
LOC102552827	0.014	0.009	0.469	0.001	0.663206	9.89915	496.124	14.9262	Z-014218	LOC102552827	gene		D:\assemblies\Rattus_norvegicus-Rnor_6.0-dbSNP149\Rattus_norvegicus-Rnor_6.0-dbSNP149.genometemplate\sequences\NC_005106_chr7.gbk#0	145729302	NC_005106.4	-	977	11242292..11241316	102552827, 7709067		LOC102552827
Jsrp1	0.034	0.005	15.245	0.143	0.138834	0.033141	106.323	0.23871	Z-014251	Jsrp1	gene		D:\assemblies\Rattus_norvegicus-Rnor_6.0-dbSNP149\Rattus_norvegicus-Rnor_6.0-dbSNP149.genometemplate\sequences\NC_005106_chr7.gbk#0	145729302	NC_005106.4	+	4424	11769950..11774373	690423, 1596084		Jsrp1
Madcam1	0.001	0.001	9.932	0.001	1	1	10509	1	Z-014327	Madcam1	gene		D:\assemblies\Rattus_norvegicus-Rnor_6.0-dbSNP149\Rattus_norvegicus-Rnor_6.0-dbSNP149.genometemplate\sequences\NC_005106_chr7.gbk#0	145729302	NC_005106.4	-	4158	12922509..12918352	54266, 3029		Madcam1
Akap8l	1.851	4.769	107.185	3.722	2.57673	1.28119	28.7955	0.497214	Z-014365	Akap8l	gene		D:\assemblies\Rattus_norvegicus-Rnor_6.0-dbSNP149\Rattus_norvegicus-Rnor_6.0-dbSNP149.genometemplate\sequences\NC_005106_chr7.gbk#0	145729302	NC_005106.4	-	29668	14369835..14340168	299569, 1359200		Akap8l
LOC102555438	0.001	0.001	0.06	0.001	1	1	63.9114	1	Z-014370	LOC102555438	gene		D:\assemblies\Rattus_norvegicus-Rnor_6.0-dbSNP149\Rattus_norvegicus-Rnor_6.0-dbSNP149.genometemplate\sequences\NC_005106_chr7.gbk#0	145729302	NC_005106.4	-	5051	14493011..14487961	102555438, 7717280		LOC102555438
RGD1560291	0.001	0.001	0.049	0.001	1	1	51.6042	1	Z-014420	RGD1560291	gene		D:\assemblies\Rattus_norvegicus-Rnor_6.0-dbSNP149\Rattus_norvegicus-Rnor_6.0-dbSNP149.genometemplate\sequences\NC_005106_chr7.gbk#0	145729302	NC_005106.4	-	32987	17535327..17502341	299656, 1560291		RGD1560291
LOC108351419	0.001	0.091	0.001	0.154	95.8591	0.589453	0.00614916	0.00614916	Z-014468	LOC108351419	gene		D:\assemblies\Rattus_norvegicus-Rnor_6.0-dbSNP149\Rattus_norvegicus-Rnor_6.0-dbSNP149.genometemplate\sequences\NC_005106_chr7.gbk#0	145729302	NC_005106.4	+	3799	22018446..22022244	108351419		LOC108351419
LOC103692812	0.098	1.023	21.34	0.992	10.4758	1.03192	21.5184	0.0985053	Z-014501	LOC103692812	gene		D:\assemblies\Rattus_norvegicus-Rnor_6.0-dbSNP149\Rattus_norvegicus-Rnor_6.0-dbSNP149.genometemplate\sequences\NC_005106_chr7.gbk#0	145729302	NC_005106.4	+	1238	25041059..25042296	103692812, 9104950		LOC103692812
LOC100910949	0.001	0.001	1.612	0.001	1	1	1705.45	1	Z-014502	LOC100910949	gene		D:\assemblies\Rattus_norvegicus-Rnor_6.0-dbSNP149\Rattus_norvegicus-Rnor_6.0-dbSNP149.genometemplate\sequences\NC_005106_chr7.gbk#0	145729302	NC_005106.4	-	5411	25265794..25260384	100910949, 6495477		LOC100910949
Spic	19.355	36.439	3.6	31.23	1.8827	1.16678	0.115272	0.619739	Z-014555	Spic	gene		D:\assemblies\Rattus_norvegicus-Rnor_6.0-dbSNP149\Rattus_norvegicus-Rnor_6.0-dbSNP149.genometemplate\sequences\NC_005106_chr7.gbk#0	145729302	NC_005106.4	-	7732	29233452..29225721	314711, 1306272		Spic
RGD1561102	0.001	0.001	0.331	0.001	1	1	350.679	1	Z-014556	RGD1561102	gene		D:\assemblies\Rattus_norvegicus-Rnor_6.0-dbSNP149\Rattus_norvegicus-Rnor_6.0-dbSNP149.genometemplate\sequences\NC_005106_chr7.gbk#0	145729302	NC_005106.4	-	788	29282039..29281252	299713, 1561102		RGD1561102
Nr1h4	0.001	0.001	0.175	0.001	1	1	185.351	1	Z-014565	Nr1h4	gene		D:\assemblies\Rattus_norvegicus-Rnor_6.0-dbSNP149\Rattus_norvegicus-Rnor_6.0-dbSNP149.genometemplate\sequences\NC_005106_chr7.gbk#0	145729302	NC_005106.4	-	158667	30162095..30003429	60351, 628831		Nr1h4	Fxr
Snrpf	53.298	122.562	562.175	68.846	2.29958	1.78024	8.16571	0.774159	Z-014619	Snrpf	gene		D:\assemblies\Rattus_norvegicus-Rnor_6.0-dbSNP149\Rattus_norvegicus-Rnor_6.0-dbSNP149.genometemplate\sequences\NC_005106_chr7.gbk#0	145729302	NC_005106.4	-	6704	34485034..34478331	680737, 1588229		Snrpf
Usp44	0.001	0.005	0.465	0.001	5.63345	5.63345	491.754	1	Z-014622	Usp44	gene		D:\assemblies\Rattus_norvegicus-Rnor_6.0-dbSNP149\Rattus_norvegicus-Rnor_6.0-dbSNP149.genometemplate\sequences\NC_005106_chr7.gbk#0	145729302	NC_005106.4	+	45060	34714293..34759352	314746, 1308216		Usp44
LOC103692840	0.006	0.001	0.001	0.431	0.156792	0.00219302	0.00219302	0.0139868	Z-014681	LOC103692840	gene		D:\assemblies\Rattus_norvegicus-Rnor_6.0-dbSNP149\Rattus_norvegicus-Rnor_6.0-dbSNP149.genometemplate\sequences\NC_005106_chr7.gbk#0	145729302	NC_005106.4	+	106847	41752117..41858963	103692840, 9126689		LOC103692840
Lrriq1	0.016	0.028	0.001	0.158	1.70368	0.176625	0.00598191	0.103673	Z-014696	Lrriq1	gene		D:\assemblies\Rattus_norvegicus-Rnor_6.0-dbSNP149\Rattus_norvegicus-Rnor_6.0-dbSNP149.genometemplate\sequences\NC_005106_chr7.gbk#0	145729302	NC_005106.4	-	102918	45187614..45084697	299759, 1564903		Lrriq1
E2f7	0.387	0.922	0.053	0.937	2.38467	0.983705	0.0561099	0.412512	Z-014721	E2f7	gene		D:\assemblies\Rattus_norvegicus-Rnor_6.0-dbSNP149\Rattus_norvegicus-Rnor_6.0-dbSNP149.genometemplate\sequences\NC_005106_chr7.gbk#0	145729302	NC_005106.4	+	42603	53275659..53318261	314818, 1310258		E2f7	E2F-7
Kcnmb4	0.008	0.01	1.253	0.001	1.22185	10.7005	1326.27	8.7576	Z-014766	Kcnmb4	gene		D:\assemblies\Rattus_norvegicus-Rnor_6.0-dbSNP149\Rattus_norvegicus-Rnor_6.0-dbSNP149.genometemplate\sequences\NC_005106_chr7.gbk#0	145729302	NC_005106.4	-	52952	59514759..59461808	66016, 620728		Kcnmb4
Best3	0.001	0.033	0.084	0.001	34.7295	34.7295	88.9763	1	Z-014773	Best3	gene		D:\assemblies\Rattus_norvegicus-Rnor_6.0-dbSNP149\Rattus_norvegicus-Rnor_6.0-dbSNP149.genometemplate\sequences\NC_005106_chr7.gbk#0	145729302	NC_005106.4	+	86079	59971084..60057162	314847, 1305439		Best3	Vmd2l3
Tmbim4	6.924	20.274	79.801	9.082	2.92793	2.23246	8.78711	0.76247	Z-014827	Tmbim4	gene		D:\assemblies\Rattus_norvegicus-Rnor_6.0-dbSNP149\Rattus_norvegicus-Rnor_6.0-dbSNP149.genometemplate\sequences\NC_005106_chr7.gbk#0	145729302	NC_005106.4	+	14589	64987859..65002447	362884, 735173		Tmbim4	Cgi119
LOC108351479	0.001	0.001	0.334	0.001	1	1	353.338	1	Z-014949	LOC108351479	gene		D:\assemblies\Rattus_norvegicus-Rnor_6.0-dbSNP149\Rattus_norvegicus-Rnor_6.0-dbSNP149.genometemplate\sequences\NC_005106_chr7.gbk#0	145729302	NC_005106.4	+	26289	75226572..75252860	108351479		LOC108351479
LOC100910524	0.039	0.005	0.841	0.001	0.124071	5.05715	889.655	40.7602	Z-014960	LOC100910524	gene		D:\assemblies\Rattus_norvegicus-Rnor_6.0-dbSNP149\Rattus_norvegicus-Rnor_6.0-dbSNP149.genometemplate\sequences\NC_005106_chr7.gbk#0	145729302	NC_005106.4	+	36109	75744800..75780908	100910524, 6497839		LOC100910524
Angpt1	2.871	0.334	0.001	2.859	0.116526	0.116996	0.000330573	1.00403	Z-015004	Angpt1	gene		D:\assemblies\Rattus_norvegicus-Rnor_6.0-dbSNP149\Rattus_norvegicus-Rnor_6.0-dbSNP149.genometemplate\sequences\NC_005106_chr7.gbk#0	145729302	NC_005106.4	-	254133	81592459..81338327	89807, 628896		Angpt1	Agpt, Agpt1, Ang-1
Aard	0.006	0.001	0.001	0.322	0.157856	0.00293256	0.00293256	0.0185775	Z-015036	Aard	gene		D:\assemblies\Rattus_norvegicus-Rnor_6.0-dbSNP149\Rattus_norvegicus-Rnor_6.0-dbSNP149.genometemplate\sequences\NC_005106_chr7.gbk#0	145729302	NC_005106.4	+	4842	91588458..91593299	246323, 631378		Aard	A5D3
Enpp2	0.779	1.105	27.111	1.03	1.4183	1.07304	26.3159	0.756566	Z-015049	Enpp2	gene		D:\assemblies\Rattus_norvegicus-Rnor_6.0-dbSNP149\Rattus_norvegicus-Rnor_6.0-dbSNP149.genometemplate\sequences\NC_005106_chr7.gbk#0	145729302	NC_005106.4	-	83156	94563086..94479931	84050, 69298		Enpp2
LOC102552118	0.01	0.122	4.627	0.334	12.3884	0.364047	13.8437	0.029386	Z-015058	LOC102552118	gene		D:\assemblies\Rattus_norvegicus-Rnor_6.0-dbSNP149\Rattus_norvegicus-Rnor_6.0-dbSNP149.genometemplate\sequences\NC_005106_chr7.gbk#0	145729302	NC_005106.4	+	1337	95673588..95674924	102552118, 7726105		LOC102552118
Klhl38	0.024	0.001	0.001	0.152	0.0390701	0.00623539	0.00623539	0.159595	Z-015078	Klhl38	gene		D:\assemblies\Rattus_norvegicus-Rnor_6.0-dbSNP149\Rattus_norvegicus-Rnor_6.0-dbSNP149.genometemplate\sequences\NC_005106_chr7.gbk#0	145729302	NC_005106.4	-	9210	98197163..98187954	314996, 1564169		Klhl38
LOC500876	0.001	0.001	2.04	0.001	1	1	2158.38	1	Z-015106	LOC500876	gene		D:\assemblies\Rattus_norvegicus-Rnor_6.0-dbSNP149\Rattus_norvegicus-Rnor_6.0-dbSNP149.genometemplate\sequences\NC_005106_chr7.gbk#0	145729302	NC_005106.4	-	1734	100382897..100381164	500876, 1564901		LOC500876
LOC108351504	0.005	0.009	0.325	0.001	1.6638	9.54045	344.013	5.73413	Z-015132	LOC108351504	gene		D:\assemblies\Rattus_norvegicus-Rnor_6.0-dbSNP149\Rattus_norvegicus-Rnor_6.0-dbSNP149.genometemplate\sequences\NC_005106_chr7.gbk#0	145729302	NC_005106.4	+	1466	104608022..104609487	108351504		LOC108351504
Zfat	8.892	16.023	1.426	13.172	1.80198	1.21646	0.108269	0.675069	Z-015155	Zfat	gene		D:\assemblies\Rattus_norvegicus-Rnor_6.0-dbSNP149\Rattus_norvegicus-Rnor_6.0-dbSNP149.genometemplate\sequences\NC_005106_chr7.gbk#0	145729302	NC_005106.4	-	169735	109207511..109037777	362925, 1310886		Zfat	Zfat1, Zfp406
Ly6d	0.001	0.001	0.742	0.001	1	1	785.028	1	Z-015194	Ly6d	gene		D:\assemblies\Rattus_norvegicus-Rnor_6.0-dbSNP149\Rattus_norvegicus-Rnor_6.0-dbSNP149.genometemplate\sequences\NC_005106_chr7.gbk#0	145729302	NC_005106.4	-	1509	115994812..115993304	315075, 1306132		Ly6d
LOC100910068	0.001	0.001	4.073	0.001	1	1	4309.18	1	Z-015195	LOC100910068	gene		D:\assemblies\Rattus_norvegicus-Rnor_6.0-dbSNP149\Rattus_norvegicus-Rnor_6.0-dbSNP149.genometemplate\sequences\NC_005106_chr7.gbk#0	145729302	NC_005106.4	-	3505	116037583..116034079	100910068, 6500491		LOC100910068
Psca	0.09	1.836	0.001	0.936	20.2915	1.96077	0.00100927	0.0966301	Z-015198	Psca	gene		D:\assemblies\Rattus_norvegicus-Rnor_6.0-dbSNP149\Rattus_norvegicus-Rnor_6.0-dbSNP149.genometemplate\sequences\NC_005106_chr7.gbk#0	145729302	NC_005106.4	+	1767	116090189..116091955	680210		Psca
Ly6k	0.001	0.001	4.073	0.001	1	1	4309.18	1	Z-015199	Ly6k	gene		D:\assemblies\Rattus_norvegicus-Rnor_6.0-dbSNP149\Rattus_norvegicus-Rnor_6.0-dbSNP149.genometemplate\sequences\NC_005106_chr7.gbk#0	145729302	NC_005106.4	-	3505	116107148..116103644	100363492, 2322953		Ly6k
Ly6h	0.001	0.016	0.695	0.001	17.2959	17.2959	735.037	1	Z-015213	Ly6h	gene		D:\assemblies\Rattus_norvegicus-Rnor_6.0-dbSNP149\Rattus_norvegicus-Rnor_6.0-dbSNP149.genometemplate\sequences\NC_005106_chr7.gbk#0	145729302	NC_005106.4	-	2517	116608072..116605556	300025, 1311896		Ly6h
Fbxl6	2.199	3.678	24.399	2.777	1.67254	1.32471	8.78719	0.792036	Z-015264	Fbxl6	gene		D:\assemblies\Rattus_norvegicus-Rnor_6.0-dbSNP149\Rattus_norvegicus-Rnor_6.0-dbSNP149.genometemplate\sequences\NC_005106_chr7.gbk#0	145729302	NC_005106.4	-	2899	117604954..117602056	362941, 1359687		Fbxl6
LOC108351609	0.004	0.023	0.188	0.001	5.76013	24.2391	198.487	4.20809	Z-015266	LOC108351609	gene		D:\assemblies\Rattus_norvegicus-Rnor_6.0-dbSNP149\Rattus_norvegicus-Rnor_6.0-dbSNP149.genometemplate\sequences\NC_005106_chr7.gbk#0	145729302	NC_005106.4	-	1967	117611040..117609074	108351609		LOC108351609
Arhgap39	3.245	4.441	0.248	3.788	1.36853	1.17244	0.0654854	0.856715	Z-015284	Arhgap39	gene		D:\assemblies\Rattus_norvegicus-Rnor_6.0-dbSNP149\Rattus_norvegicus-Rnor_6.0-dbSNP149.genometemplate\sequences\NC_005106_chr7.gbk#0	145729302	NC_005106.4	-	91614	117880329..117788716	500901, 1593158		Arhgap39	Porf-2
Apol2	1.059	3.386	0.001	1.028	3.19601	3.29341	0.000919365	1.03048	Z-015305	Apol2	gene		D:\assemblies\Rattus_norvegicus-Rnor_6.0-dbSNP149\Rattus_norvegicus-Rnor_6.0-dbSNP149.genometemplate\sequences\NC_005106_chr7.gbk#0	145729302	NC_005106.4	-	7796	118735453..118727658	315111, 1309591		Apol2
Apol9a	4.162	6.34	0.459	5.342	1.52343	1.18676	0.0858765	0.779009	Z-015311	Apol9a	gene		D:\assemblies\Rattus_norvegicus-Rnor_6.0-dbSNP149\Rattus_norvegicus-Rnor_6.0-dbSNP149.genometemplate\sequences\NC_005106_chr7.gbk#0	145729302	NC_005106.4	-	6766	118933778..118927013	503164, 1562332		Apol9a
LOC100911804	1.16	3.726	0.001	2.618	3.21189	1.42298	0.000360979	0.443035	Z-015314	LOC100911804	gene		D:\assemblies\Rattus_norvegicus-Rnor_6.0-dbSNP149\Rattus_norvegicus-Rnor_6.0-dbSNP149.genometemplate\sequences\NC_005106_chr7.gbk#0	145729302	NC_005106.4	-	7470	118986699..118979230	100911804, 6490440		LOC100911804
Cacng2	2.825	12.739	0.339	4.583	4.50912	2.77949	0.0740312	0.616416	Z-015323	Cacng2	gene		D:\assemblies\Rattus_norvegicus-Rnor_6.0-dbSNP149\Rattus_norvegicus-Rnor_6.0-dbSNP149.genometemplate\sequences\NC_005106_chr7.gbk#0	145729302	NC_005106.4	-	125221	119353332..119228112	84347, 71095		Cacng2	Ipr328
Tex33	0.001	0.001	0.141	0.001	1	1	149.268	1	Z-015329	Tex33	gene		D:\assemblies\Rattus_norvegicus-Rnor_6.0-dbSNP149\Rattus_norvegicus-Rnor_6.0-dbSNP149.genometemplate\sequences\NC_005106_chr7.gbk#0	145729302	NC_005106.4	-	15115	119613175..119598061	686841, 1592508		Tex33
Sstr3	0.001	0.001	2.269	0.001	1	1	2401.14	1	Z-015337	Sstr3	gene		D:\assemblies\Rattus_norvegicus-Rnor_6.0-dbSNP149\Rattus_norvegicus-Rnor_6.0-dbSNP149.genometemplate\sequences\NC_005106_chr7.gbk#0	145729302	NC_005106.4	-	7202	119768082..119760881	171044, 620308		Sstr3	Smstr28, SSTR
Enthd1	0.001	0.001	0.039	0.001	1	1	41.2072	1	Z-015400	Enthd1	gene		D:\assemblies\Rattus_norvegicus-Rnor_6.0-dbSNP149\Rattus_norvegicus-Rnor_6.0-dbSNP149.genometemplate\sequences\NC_005106_chr7.gbk#0	145729302	NC_005106.4	-	115674	121784530..121668857	685900, 1587874		Enthd1	RGD1565081
LOC108351516	0.589	0.142	9.697	1.153	0.241721	0.123575	8.41314	0.511229	Z-015402	LOC108351516	gene		D:\assemblies\Rattus_norvegicus-Rnor_6.0-dbSNP149\Rattus_norvegicus-Rnor_6.0-dbSNP149.genometemplate\sequences\NC_005106_chr7.gbk#0	145729302	NC_005106.4	-	3106	121870440..121867335	108351516		LOC108351516
LOC100362980	2.236	10.065	58.101	2.583	4.50172	3.89633	22.4921	0.86552	Z-015406	LOC100362980	gene		D:\assemblies\Rattus_norvegicus-Rnor_6.0-dbSNP149\Rattus_norvegicus-Rnor_6.0-dbSNP149.genometemplate\sequences\NC_005106_chr7.gbk#0	145729302	NC_005106.4	+	4762	122159815..122164576	100362980, 2323713		LOC100362980
LOC100364435	15.524	19.252	306.883	15.03	1.24015	1.28091	20.4185	1.03287	Z-015409	LOC100364435	gene		D:\assemblies\Rattus_norvegicus-Rnor_6.0-dbSNP149\Rattus_norvegicus-Rnor_6.0-dbSNP149.genometemplate\sequences\NC_005106_chr7.gbk#0	145729302	NC_005106.4	+	207	122433061..122433267	100364435, 2321025		LOC100364435
Efcab6	0.001	0.021	0.044	0.001	22.6608	22.6608	46.8966	1	Z-015479	Efcab6	gene		D:\assemblies\Rattus_norvegicus-Rnor_6.0-dbSNP149\Rattus_norvegicus-Rnor_6.0-dbSNP149.genometemplate\sequences\NC_005106_chr7.gbk#0	145729302	NC_005106.4	-	190053	124948428..124758376	315179, 1309065		Efcab6
Parvb	24.349	48.059	0.501	29.754	1.97377	1.61519	0.0168357	0.818325	Z-015485	Parvb	gene		D:\assemblies\Rattus_norvegicus-Rnor_6.0-dbSNP149\Rattus_norvegicus-Rnor_6.0-dbSNP149.genometemplate\sequences\NC_005106_chr7.gbk#0	145729302	NC_005106.4	+	86151	125189827..125275977	362973, 1311485		Parvb
LOC102554986	11.118	30.824	1.231	14.115	2.77242	2.18373	0.0872324	0.787662	Z-015486	LOC102554986	gene		D:\assemblies\Rattus_norvegicus-Rnor_6.0-dbSNP149\Rattus_norvegicus-Rnor_6.0-dbSNP149.genometemplate\sequences\NC_005106_chr7.gbk#0	145729302	NC_005106.4	-	7727	125283306..125275580	102554986, 7574560		LOC102554986
Fam19a5	0.006	0.078	0.441	0.001	12.6958	82.4393	466.374	6.49345	Z-015525	Fam19a5	gene		D:\assemblies\Rattus_norvegicus-Rnor_6.0-dbSNP149\Rattus_norvegicus-Rnor_6.0-dbSNP149.genometemplate\sequences\NC_005106_chr7.gbk#0	145729302	NC_005106.4	+	228826	128500009..128728834	500915, 1562115		Fam19a5	RGD1562115, Tafa-5
LOC102547254	0.005	0.011	0.602	0.001	2.15789	11.3941	636.945	5.28019	Z-015534	LOC102547254	gene		D:\assemblies\Rattus_norvegicus-Rnor_6.0-dbSNP149\Rattus_norvegicus-Rnor_6.0-dbSNP149.genometemplate\sequences\NC_005106_chr7.gbk#0	145729302	NC_005106.4	-	8498	129745477..129736980	102547254, 7529302		LOC102547254
Hdac10	0.466	0.846	12.14	0.583	1.81532	1.4506	20.8093	0.799088	Z-015546	Hdac10	gene		D:\assemblies\Rattus_norvegicus-Rnor_6.0-dbSNP149\Rattus_norvegicus-Rnor_6.0-dbSNP149.genometemplate\sequences\NC_005106_chr7.gbk#0	145729302	NC_005106.4	-	6702	130109036..130102335	362981, 1305874		Hdac10
Dennd6b	0.293	0.081	7.988	0.216	0.276037	0.374902	37.0114	1.35816	Z-015553	Dennd6b	gene		D:\assemblies\Rattus_norvegicus-Rnor_6.0-dbSNP149\Rattus_norvegicus-Rnor_6.0-dbSNP149.genometemplate\sequences\NC_005106_chr7.gbk#0	145729302	NC_005106.4	-	15555	130178282..130162728	362983, 1308012		Dennd6b	Fam116b, RGD1308012
Miox	0.001	0.001	0.154	0.001	1	1	163.078	1	Z-015558	Miox	gene		D:\assemblies\Rattus_norvegicus-Rnor_6.0-dbSNP149\Rattus_norvegicus-Rnor_6.0-dbSNP149.genometemplate\sequences\NC_005106_chr7.gbk#0	145729302	NC_005106.4	+	2499	130308707..130311205	252899, 628739		Miox	Aldrl6, RSOR
Syce3	0.007	0.083	1.33	0.001	11.2193	88.2226	1407.73	7.86349	Z-015564	Syce3	gene		D:\assemblies\Rattus_norvegicus-Rnor_6.0-dbSNP149\Rattus_norvegicus-Rnor_6.0-dbSNP149.genometemplate\sequences\NC_005106_chr7.gbk#0	145729302	NC_005106.4	-	26163	130386673..130360511	689933, 1586367		Syce3
LOC102550441	0.044	0.006	6.001	0.001	0.134348	6.29738	6348.88	46.8736	Z-015576	LOC102550441	gene		D:\assemblies\Rattus_norvegicus-Rnor_6.0-dbSNP149\Rattus_norvegicus-Rnor_6.0-dbSNP149.genometemplate\sequences\NC_005106_chr7.gbk#0	145729302	NC_005106.4	-	60526	131435319..131374794	102550441, 7632639		LOC102550441
Cntn1	0.007	0.006	0.279	0.001	0.903306	6.32431	295.491	7.00129	Z-015589	Cntn1	gene		D:\assemblies\Rattus_norvegicus-Rnor_6.0-dbSNP149\Rattus_norvegicus-Rnor_6.0-dbSNP149.genometemplate\sequences\NC_005106_chr7.gbk#0	145729302	NC_005106.4	+	297709	133290606..133588314	117258, 621300		Cntn1	F3
RGD1564963	0.001	0.065	0.757	0.001	68.6193	68.6193	800.491	1	Z-015634	RGD1564963	gene		D:\assemblies\Rattus_norvegicus-Rnor_6.0-dbSNP149\Rattus_norvegicus-Rnor_6.0-dbSNP149.genometemplate\sequences\NC_005106_chr7.gbk#0	145729302	NC_005106.4	-	543	137917825..137917283	503169, 1564963		RGD1564963
Endou	0.947	2.843	0.001	1.11	3.00097	2.56164	0.000851742	0.853603	Z-015653	Endou	gene		D:\assemblies\Rattus_norvegicus-Rnor_6.0-dbSNP149\Rattus_norvegicus-Rnor_6.0-dbSNP149.genometemplate\sequences\NC_005106_chr7.gbk#0	145729302	NC_005106.4	-	20681	139223022..139202342	680317, 1593011		Endou	Pp11r
Slc48a1	10.652	20.169	1.327	17.898	1.89352	1.12691	0.0741337	0.595137	Z-015656	Slc48a1	gene		D:\assemblies\Rattus_norvegicus-Rnor_6.0-dbSNP149\Rattus_norvegicus-Rnor_6.0-dbSNP149.genometemplate\sequences\NC_005106_chr7.gbk#0	145729302	NC_005106.4	+	7802	139271698..139279499	300191, 1562880		Slc48a1	HRG-1, Hrg1
LOC108351548	0.004	0.02	0.114	0.001	5.03167	20.739	120.783	4.1217	Z-015658	LOC108351548	gene		D:\assemblies\Rattus_norvegicus-Rnor_6.0-dbSNP149\Rattus_norvegicus-Rnor_6.0-dbSNP149.genometemplate\sequences\NC_005106_chr7.gbk#0	145729302	NC_005106.4	+	11905	139324874..139336778	108351548		LOC108351548
Olr1106	0.001	0.01	0.113	0.001	10.2436	10.2436	119.414	1	Z-015678	Olr1106	gene		D:\assemblies\Rattus_norvegicus-Rnor_6.0-dbSNP149\Rattus_norvegicus-Rnor_6.0-dbSNP149.genometemplate\sequences\NC_005106_chr7.gbk#0	145729302	NC_005106.4	-	38521	139979104..139940584	300199, 1333319		Olr1106	ratchr7-137186586-137185657_ORF
Asic1	0.004	0.006	0.304	0.001	1.47141	5.85982	321.892	3.98245	Z-015737	Asic1	gene		D:\assemblies\Rattus_norvegicus-Rnor_6.0-dbSNP149\Rattus_norvegicus-Rnor_6.0-dbSNP149.genometemplate\sequences\NC_005106_chr7.gbk#0	145729302	NC_005106.4	+	30224	141324714..141354937	79123, 71062		Asic1	Accn2
Krt83	0.003	0.001	0.001	0.075	0.284425	0.0126375	0.0126375	0.0444317	Z-015781	Krt83	gene		D:\assemblies\Rattus_norvegicus-Rnor_6.0-dbSNP149\Rattus_norvegicus-Rnor_6.0-dbSNP149.genometemplate\sequences\NC_005106_chr7.gbk#0	145729302	NC_005106.4	-	6838	143085833..143078996	681126, 1583565		Krt83
Krt71	0.262	0.13	0.001	0.306	0.49569	0.425349	0.00309156	0.858095	Z-015794	Krt71	gene		D:\assemblies\Rattus_norvegicus-Rnor_6.0-dbSNP149\Rattus_norvegicus-Rnor_6.0-dbSNP149.genometemplate\sequences\NC_005106_chr7.gbk#0	145729302	NC_005106.4	-	26146	143371346..143345201	683613, 1584538		Krt71
Sp7	3.495	5.616	0.001	2.09	1.60673	2.68725	0.000452247	1.67249	Z-015823	Sp7	gene		D:\assemblies\Rattus_norvegicus-Rnor_6.0-dbSNP149\Rattus_norvegicus-Rnor_6.0-dbSNP149.genometemplate\sequences\NC_005106_chr7.gbk#0	145729302	NC_005106.4	-	10173	143967488..143957316	300260, 631377		Sp7	Osx
RGD1563200	0.001	0.001	0.557	0.001	1	1	589.003	1	Z-015863	RGD1563200	gene		D:\assemblies\Rattus_norvegicus-Rnor_6.0-dbSNP149\Rattus_norvegicus-Rnor_6.0-dbSNP149.genometemplate\sequences\NC_005106_chr7.gbk#0	145729302	NC_005106.4	-	7806	145064502..145056697	500938, 1563200		RGD1563200
Glycam1	0.001	0.008	661.245	0.001	8.3692	8.3692	699634	1	Z-015869	Glycam1	gene		D:\assemblies\Rattus_norvegicus-Rnor_6.0-dbSNP149\Rattus_norvegicus-Rnor_6.0-dbSNP149.genometemplate\sequences\NC_005106_chr7.gbk#0	145729302	NC_005106.4	-	2261	145174756..145172496	25258, 2712		Glycam1
LOC102549509	0.003	0.096	0.141	0.001	30.4917	101.268	148.909	3.32117	Z-015882	LOC102549509	gene		D:\assemblies\Rattus_norvegicus-Rnor_6.0-dbSNP149\Rattus_norvegicus-Rnor_6.0-dbSNP149.genometemplate\sequences\NC_005107_chr8.gbk#0	133307652	NC_005107.4	+	1832	1358316..1360147	102549509, 7611148		LOC102549509
Mmp8	33.016	84.973	2.25	37.829	2.57369	2.24625	0.0594806	0.872773	Z-015920	Mmp8	gene		D:\assemblies\Rattus_norvegicus-Rnor_6.0-dbSNP149\Rattus_norvegicus-Rnor_6.0-dbSNP149.genometemplate\sequences\NC_005107_chr8.gbk#0	133307652	NC_005107.4	+	8934	5768808..5777741	63849, 631408		Mmp8
Mmp7	0.001	0.001	0.674	0.001	1	1	712.937	1	Z-015923	Mmp7	gene		D:\assemblies\Rattus_norvegicus-Rnor_6.0-dbSNP149\Rattus_norvegicus-Rnor_6.0-dbSNP149.genometemplate\sequences\NC_005107_chr8.gbk#0	133307652	NC_005107.4	+	7713	5893253..5900965	25335, 3100		Mmp7	MPMM
LOC654482	1.159	0.133	0.001	0.973	0.114955	0.136964	0.000971825	1.19146	Z-015930	LOC654482	gene		D:\assemblies\Rattus_norvegicus-Rnor_6.0-dbSNP149\Rattus_norvegicus-Rnor_6.0-dbSNP149.genometemplate\sequences\NC_005107_chr8.gbk#0	133307652	NC_005107.4	-	18048	6236438..6218391	654482, 1591894		LOC654482
Gpr83	0.001	0.001	0.083	0.001	1	1	87.5141	1	Z-015966	Gpr83	gene		D:\assemblies\Rattus_norvegicus-Rnor_6.0-dbSNP149\Rattus_norvegicus-Rnor_6.0-dbSNP149.genometemplate\sequences\NC_005107_chr8.gbk#0	133307652	NC_005107.4	+	10489	13365583..13376071	140595, 619891		Gpr83	Gir
Izumo1r	0.001	0.001	4.182	0.001	1	1	4424.54	1	Z-015968	Izumo1r	gene		D:\assemblies\Rattus_norvegicus-Rnor_6.0-dbSNP149\Rattus_norvegicus-Rnor_6.0-dbSNP149.genometemplate\sequences\NC_005107_chr8.gbk#0	133307652	NC_005107.4	-	2490	13418907..13416418	690037, 1585174		Izumo1r
LOC102549753	0.001	0.001	0.115	0.001	1	1	121.542	1	Z-015969	LOC102549753	gene		D:\assemblies\Rattus_norvegicus-Rnor_6.0-dbSNP149\Rattus_norvegicus-Rnor_6.0-dbSNP149.genometemplate\sequences\NC_005107_chr8.gbk#0	133307652	NC_005107.4	+	10876	13418109..13428984	102549753, 7519965		LOC102549753
LOC102552397	0.001	0.001	11.062	0.001	1	1	11704.1	1	Z-016080	LOC102552397	gene		D:\assemblies\Rattus_norvegicus-Rnor_6.0-dbSNP149\Rattus_norvegicus-Rnor_6.0-dbSNP149.genometemplate\sequences\NC_005107_chr8.gbk#0	133307652	NC_005107.4	-	3146	21644444..21641299	102552397, 7711967		LOC102552397
Zglp1	0.001	0.006	0.245	0.001	6.41122	6.41122	259.178	1	Z-016101	Zglp1	gene		D:\assemblies\Rattus_norvegicus-Rnor_6.0-dbSNP149\Rattus_norvegicus-Rnor_6.0-dbSNP149.genometemplate\sequences\NC_005107_chr8.gbk#0	133307652	NC_005107.4	-	5008	22086446..22081439	100360291, 2322460		Zglp1
Rab3d	4.544	5.441	0.58	6.083	1.1974	0.894372	0.0953576	0.746926	Z-016128	Rab3d	gene		D:\assemblies\Rattus_norvegicus-Rnor_6.0-dbSNP149\Rattus_norvegicus-Rnor_6.0-dbSNP149.genometemplate\sequences\NC_005107_chr8.gbk#0	133307652	NC_005107.4	-	9131	22929368..22920238	140665, 620924		Rab3d
LOC103690166	0.001	0.06	0.356	0.001	63.2244	63.2244	376.505	1	Z-016145	LOC103690166	gene		D:\assemblies\Rattus_norvegicus-Rnor_6.0-dbSNP149\Rattus_norvegicus-Rnor_6.0-dbSNP149.genometemplate\sequences\NC_005107_chr8.gbk#0	133307652	NC_005107.4	-	15496	23251017..23235522	103690166, 9236890		LOC103690166
LOC108351663	0.944	5.519	124.908	0.93	5.84505	5.93242	134.255	1.01495	Z-016162	LOC108351663	gene		D:\assemblies\Rattus_norvegicus-Rnor_6.0-dbSNP149\Rattus_norvegicus-Rnor_6.0-dbSNP149.genometemplate\sequences\NC_005107_chr8.gbk#0	133307652	NC_005107.4	+	3604	26256192..26259795	108351663		LOC108351663
Igsf9b	0.001	0.001	0.053	0.001	1	1	56.6028	1	Z-016181	Igsf9b	gene		D:\assemblies\Rattus_norvegicus-Rnor_6.0-dbSNP149\Rattus_norvegicus-Rnor_6.0-dbSNP149.genometemplate\sequences\NC_005107_chr8.gbk#0	133307652	NC_005107.4	+	46163	28352497..28398659	315510, 1564717		Igsf9b
Adamts8	0.001	0.001	0.097	0.001	1	1	102.959	1	Z-016191	Adamts8	gene		D:\assemblies\Rattus_norvegicus-Rnor_6.0-dbSNP149\Rattus_norvegicus-Rnor_6.0-dbSNP149.genometemplate\sequences\NC_005107_chr8.gbk#0	133307652	NC_005107.4	+	19846	32017684..32037529	300475, 1308511		Adamts8
Kcnj1	0.001	0.001	0.136	0.001	1	1	143.951	1	Z-016205	Kcnj1	gene		D:\assemblies\Rattus_norvegicus-Rnor_6.0-dbSNP149\Rattus_norvegicus-Rnor_6.0-dbSNP149.genometemplate\sequences\NC_005107_chr8.gbk#0	133307652	NC_005107.4	+	28848	33490280..33519127	24521, 2957		Kcnj1	KAB-1, Kcnj, kir1.1, ROMK1
LOC103693041	0.001	0.001	0.337	0.001	1	1	357.091	1	Z-016260	LOC103693041	gene		D:\assemblies\Rattus_norvegicus-Rnor_6.0-dbSNP149\Rattus_norvegicus-Rnor_6.0-dbSNP149.genometemplate\sequences\NC_005107_chr8.gbk#0	133307652	NC_005107.4	+	45773	38162757..38208529	103693041, 9245653		LOC103693041
Nrgn	98.029	299.372	0.639	105.424	3.0539	2.8397	0.00605877	0.92986	Z-016287	Nrgn	gene		D:\assemblies\Rattus_norvegicus-Rnor_6.0-dbSNP149\Rattus_norvegicus-Rnor_6.0-dbSNP149.genometemplate\sequences\NC_005107_chr8.gbk#0	133307652	NC_005107.4	-	8145	40023193..40015049	64356, 61833		Nrgn	BICKS, RC3
Crtam	0.001	0.005	0.46	0.001	5.43041	5.43041	487.192	1	Z-016444	Crtam	gene		D:\assemblies\Rattus_norvegicus-Rnor_6.0-dbSNP149\Rattus_norvegicus-Rnor_6.0-dbSNP149.genometemplate\sequences\NC_005107_chr8.gbk#0	133307652	NC_005107.4	-	63499	45216082..45152584	300649, 1304602		Crtam
LOC108351685	0.004	0.134	71.063	0.001	35.8494	142.099	75188.5	3.96377	Z-016458	LOC108351685	gene		D:\assemblies\Rattus_norvegicus-Rnor_6.0-dbSNP149\Rattus_norvegicus-Rnor_6.0-dbSNP149.genometemplate\sequences\NC_005107_chr8.gbk#0	133307652	NC_005107.4	+	6155	46501033..46507187	108351685		LOC108351685
LOC102549755	0.601	0.1	0.001	0.279	0.166528	0.358193	0.00338387	2.15094	Z-016463	LOC102549755	gene		D:\assemblies\Rattus_norvegicus-Rnor_6.0-dbSNP149\Rattus_norvegicus-Rnor_6.0-dbSNP149.genometemplate\sequences\NC_005107_chr8.gbk#0	133307652	NC_005107.4	+	6140	46767495..46773634	102549755, 7503878		LOC102549755
Tmem136	0.001	0.001	0.001	0.295	1	0.00320205	0.00320205	0.00320205	Z-016467	Tmem136	gene		D:\assemblies\Rattus_norvegicus-Rnor_6.0-dbSNP149\Rattus_norvegicus-Rnor_6.0-dbSNP149.genometemplate\sequences\NC_005107_chr8.gbk#0	133307652	NC_005107.4	-	4897	47404018..47399122	315593, 1565079		Tmem136	RGD1565079
Ccdc153	0.001	0.001	0.172	0.001	1	1	182.357	1	Z-016488	Ccdc153	gene		D:\assemblies\Rattus_norvegicus-Rnor_6.0-dbSNP149\Rattus_norvegicus-Rnor_6.0-dbSNP149.genometemplate\sequences\NC_005107_chr8.gbk#0	133307652	NC_005107.4	+	7139	48570718..48577856	300663, 1305351		Ccdc153	RGD1305351
Hmbs	66.419	153.634	4.909	87.131	2.3131	1.76324	0.0563417	0.762287	Z-016496	Hmbs	gene		D:\assemblies\Rattus_norvegicus-Rnor_6.0-dbSNP149\Rattus_norvegicus-Rnor_6.0-dbSNP149.genometemplate\sequences\NC_005107_chr8.gbk#0	133307652	NC_005107.4	-	7396	48674673..48667278	25709, 2801		Hmbs	hemC, PBG-D, PBGD, URO-S
Rps25	504.455	1097.38	6246.55	584.323	2.17538	1.87804	10.6902	0.863314	Z-016501	Rps25	gene		D:\assemblies\Rattus_norvegicus-Rnor_6.0-dbSNP149\Rattus_norvegicus-Rnor_6.0-dbSNP149.genometemplate\sequences\NC_005107_chr8.gbk#0	133307652	NC_005107.4	+	2377	48727346..48729722	122799, 621043		Rps25
Cxcr5	0.075	0.009	1.147	0.001	0.118897	9.46561	1214.02	79.612	Z-016506	Cxcr5	gene		D:\assemblies\Rattus_norvegicus-Rnor_6.0-dbSNP149\Rattus_norvegicus-Rnor_6.0-dbSNP149.genometemplate\sequences\NC_005107_chr8.gbk#0	133307652	NC_005107.4	-	16345	48852032..48835688	29363, 62010		Cxcr5	Blr1, NLR
LOC103693070	0.001	0.015	12.095	0.001	16.0484	16.0484	12797.1	1	Z-016519	LOC103693070	gene		D:\assemblies\Rattus_norvegicus-Rnor_6.0-dbSNP149\Rattus_norvegicus-Rnor_6.0-dbSNP149.genometemplate\sequences\NC_005107_chr8.gbk#0	133307652	NC_005107.4	+	2281	49295541..49297821	103693070, 9323711		LOC103693070
Cd3e	0.001	0.001	6.537	0.001	1	1	6916.71	1	Z-016520	Cd3e	gene		D:\assemblies\Rattus_norvegicus-Rnor_6.0-dbSNP149\Rattus_norvegicus-Rnor_6.0-dbSNP149.genometemplate\sequences\NC_005107_chr8.gbk#0	133307652	NC_005107.4	-	11767	49309370..49297604	315609, 1309222		Cd3e
Apoa4	0.001	0.001	0.089	0.001	1	1	94.0351	1	Z-016545	Apoa4	gene		D:\assemblies\Rattus_norvegicus-Rnor_6.0-dbSNP149\Rattus_norvegicus-Rnor_6.0-dbSNP149.genometemplate\sequences\NC_005107_chr8.gbk#0	133307652	NC_005107.4	+	2389	50536983..50539371	25080, 2132		Apoa4	Apo-AIV, ApoA-IV, apoAIV
LOC103693092	0.003	0.005	0.309	0.001	1.45785	5.39754	326.725	3.70239	Z-016627	LOC103693092	gene		D:\assemblies\Rattus_norvegicus-Rnor_6.0-dbSNP149\Rattus_norvegicus-Rnor_6.0-dbSNP149.genometemplate\sequences\NC_005107_chr8.gbk#0	133307652	NC_005107.4	+	24727	55690301..55715027	103693092, 9395767		LOC103693092
Pstpip1	5.249	9.308	56.26	4.534	1.77323	2.05284	12.4074	1.15768	Z-016690	Pstpip1	gene		D:\assemblies\Rattus_norvegicus-Rnor_6.0-dbSNP149\Rattus_norvegicus-Rnor_6.0-dbSNP149.genometemplate\sequences\NC_005107_chr8.gbk#0	133307652	NC_005107.4	+	39325	60760040..60799364	300732, 1307557		Pstpip1
Lman1l	0.001	0.001	0.268	0.001	1	1	283.525	1	Z-016724	Lman1l	gene		D:\assemblies\Rattus_norvegicus-Rnor_6.0-dbSNP149\Rattus_norvegicus-Rnor_6.0-dbSNP149.genometemplate\sequences\NC_005107_chr8.gbk#0	133307652	NC_005107.4	-	13565	62400370..62386806	300743, 1310538		Lman1l	slamp
LOC103690224	2.306	7.233	0.001	3.063	3.13597	2.36162	0.0003086	0.753075	Z-016730	LOC103690224	gene		D:\assemblies\Rattus_norvegicus-Rnor_6.0-dbSNP149\Rattus_norvegicus-Rnor_6.0-dbSNP149.genometemplate\sequences\NC_005107_chr8.gbk#0	133307652	NC_005107.4	+	21390	62546408..62567797	103690224, 9338481		LOC103690224
LOC103693105	0.001	0.001	0.368	0.001	1	1	389.234	1	Z-016734	LOC103693105	gene		D:\assemblies\Rattus_norvegicus-Rnor_6.0-dbSNP149\Rattus_norvegicus-Rnor_6.0-dbSNP149.genometemplate\sequences\NC_005107_chr8.gbk#0	133307652	NC_005107.4	+	3225	62779565..62782789	103693105, 9121844		LOC103693105
Ccdc33	0.001	0.001	0.038	0.001	1	1	40.5325	1	Z-016736	Ccdc33	gene		D:\assemblies\Rattus_norvegicus-Rnor_6.0-dbSNP149\Rattus_norvegicus-Rnor_6.0-dbSNP149.genometemplate\sequences\NC_005107_chr8.gbk#0	133307652	NC_005107.4	-	100753	62910520..62809768	315712, 1561126		Ccdc33
Stra6	0.001	0.001	0.998	0.001	1	1	1055.7	1	Z-016737	Stra6	gene		D:\assemblies\Rattus_norvegicus-Rnor_6.0-dbSNP149\Rattus_norvegicus-Rnor_6.0-dbSNP149.genometemplate\sequences\NC_005107_chr8.gbk#0	133307652	NC_005107.4	+	19075	62925364..62944438	363071, 1307551		Stra6	RGD1307551
Islr2	0.001	0.024	0.059	0.001	25.3919	25.3919	62.4369	1	Z-016739	Islr2	gene		D:\assemblies\Rattus_norvegicus-Rnor_6.0-dbSNP149\Rattus_norvegicus-Rnor_6.0-dbSNP149.genometemplate\sequences\NC_005107_chr8.gbk#0	133307652	NC_005107.4	-	8069	62991401..62983333	100910729, 6497037		Islr2
LOC108351714	0.003	0.004	0.052	0.001	1.26867	4.67694	55.3704	3.6865	Z-016759	LOC108351714	gene		D:\assemblies\Rattus_norvegicus-Rnor_6.0-dbSNP149\Rattus_norvegicus-Rnor_6.0-dbSNP149.genometemplate\sequences\NC_005107_chr8.gbk#0	133307652	NC_005107.4	+	17306	64268781..64286086	108351714		LOC108351714
Tmem202	0.005	0.001	2.957	0.001	0.204615	1	3128.18	4.88723	Z-016760	Tmem202	gene		D:\assemblies\Rattus_norvegicus-Rnor_6.0-dbSNP149\Rattus_norvegicus-Rnor_6.0-dbSNP149.genometemplate\sequences\NC_005107_chr8.gbk#0	133307652	NC_005107.4	-	5685	64305330..64299646	691306, 1585107		Tmem202
LOC108351715	0.008	0.001	2.029	0.001	0.111991	1	2147.2	8.92931	Z-016761	LOC108351715	gene		D:\assemblies\Rattus_norvegicus-Rnor_6.0-dbSNP149\Rattus_norvegicus-Rnor_6.0-dbSNP149.genometemplate\sequences\NC_005107_chr8.gbk#0	133307652	NC_005107.4	-	17401	64325497..64308097	108351715		LOC108351715
LOC102546688	0.001	0.001	0.903	0.001	1	1	954.986	1	Z-016771	LOC102546688	gene		D:\assemblies\Rattus_norvegicus-Rnor_6.0-dbSNP149\Rattus_norvegicus-Rnor_6.0-dbSNP149.genometemplate\sequences\NC_005107_chr8.gbk#0	133307652	NC_005107.4	-	2750	64707928..64705179	102546688, 7738034		LOC102546688
LOC102551052	0.034	1.16	0.001	0.177	34.5715	6.55726	0.00534465	0.189672	Z-016778	LOC102551052	gene		D:\assemblies\Rattus_norvegicus-Rnor_6.0-dbSNP149\Rattus_norvegicus-Rnor_6.0-dbSNP149.genometemplate\sequences\NC_005107_chr8.gbk#0	133307652	NC_005107.4	-	1618	65733443..65731826	102551052, 7661817		LOC102551052
LOC103693113	0.001	0.001	0.673	0.001	1	1	711.761	1	Z-016786	LOC103693113	gene		D:\assemblies\Rattus_norvegicus-Rnor_6.0-dbSNP149\Rattus_norvegicus-Rnor_6.0-dbSNP149.genometemplate\sequences\NC_005107_chr8.gbk#0	133307652	NC_005107.4	+	3554	66263985..66267538	103693113, 9279927		LOC103693113
LOC102546618	0.035	0.366	0.001	0.359	10.509	1.01728	0.00262926	0.0968005	Z-016809	LOC102546618	gene		D:\assemblies\Rattus_norvegicus-Rnor_6.0-dbSNP149\Rattus_norvegicus-Rnor_6.0-dbSNP149.genometemplate\sequences\NC_005107_chr8.gbk#0	133307652	NC_005107.4	-	2172	67753187..67751016	102546618, 7673837		LOC102546618
LOC108351833	0.001	0.001	0.014	0.001	1	1	14.3353	1	Z-016907	LOC108351833	gene		D:\assemblies\Rattus_norvegicus-Rnor_6.0-dbSNP149\Rattus_norvegicus-Rnor_6.0-dbSNP149.genometemplate\sequences\NC_005107_chr8.gbk#0	133307652	NC_005107.4	+	9150	75420460..75429609	108351833		LOC108351833
Mns1	0.055	0.045	8.379	0.446	0.828929	0.101549	18.7861	0.122507	Z-016942	Mns1	gene		D:\assemblies\Rattus_norvegicus-Rnor_6.0-dbSNP149\Rattus_norvegicus-Rnor_6.0-dbSNP149.genometemplate\sequences\NC_005107_chr8.gbk#0	133307652	NC_005107.4	+	20880	79054240..79075119	363093, 1549718		Mns1
LOC103693143	0.001	0.052	1.802	0.001	55.0412	55.0412	1906.7	1	Z-016955	LOC103693143	gene		D:\assemblies\Rattus_norvegicus-Rnor_6.0-dbSNP149\Rattus_norvegicus-Rnor_6.0-dbSNP149.genometemplate\sequences\NC_005107_chr8.gbk#0	133307652	NC_005107.4	-	4785	79687070..79682286	103693143, 9356400		LOC103693143
Myo5c	2.314	4.264	0.089	3.227	1.84294	1.32127	0.0275239	0.716938	Z-016977	Myo5c	gene		D:\assemblies\Rattus_norvegicus-Rnor_6.0-dbSNP149\Rattus_norvegicus-Rnor_6.0-dbSNP149.genometemplate\sequences\NC_005107_chr8.gbk#0	133307652	NC_005107.4	+	76814	82171296..82248109	315820, 1309994		Myo5c
Scg3	0.001	0.001	0.22	0.001	1	1	232.346	1	Z-016987	Scg3	gene		D:\assemblies\Rattus_norvegicus-Rnor_6.0-dbSNP149\Rattus_norvegicus-Rnor_6.0-dbSNP149.genometemplate\sequences\NC_005107_chr8.gbk#0	133307652	NC_005107.4	-	59185	82641536..82582352	116635, 621209		Scg3	SgIII
LOC108351752	0.001	0.001	0.415	0.001	1	1	439.115	1	Z-017038	LOC108351752	gene		D:\assemblies\Rattus_norvegicus-Rnor_6.0-dbSNP149\Rattus_norvegicus-Rnor_6.0-dbSNP149.genometemplate\sequences\NC_005107_chr8.gbk#0	133307652	NC_005107.4	+	33317	90510140..90543456	108351752		LOC108351752
Rwdd2a	0.001	0.078	0.172	0.001	82.3601	82.3601	182.218	1	Z-017064	Rwdd2a	gene		D:\assemblies\Rattus_norvegicus-Rnor_6.0-dbSNP149\Rattus_norvegicus-Rnor_6.0-dbSNP149.genometemplate\sequences\NC_005107_chr8.gbk#0	133307652	NC_005107.4	+	3179	94243318..94246496	363110, 1306231		Rwdd2a	Rwdd2
Snap91	0.001	0.001	0.206	0.001	1	1	218.115	1	Z-017067	Snap91	gene		D:\assemblies\Rattus_norvegicus-Rnor_6.0-dbSNP149\Rattus_norvegicus-Rnor_6.0-dbSNP149.genometemplate\sequences\NC_005107_chr8.gbk#0	133307652	NC_005107.4	-	117215	94564772..94447558	65178, 69276		Snap91	Ap180
LOC103690444	0.001	0.001	1.12	0.001	1	1	1184.58	1	Z-017074	LOC103690444	gene		D:\assemblies\Rattus_norvegicus-Rnor_6.0-dbSNP149\Rattus_norvegicus-Rnor_6.0-dbSNP149.genometemplate\sequences\NC_005107_chr8.gbk#0	133307652	NC_005107.4	+	2155	94889392..94891546	103690444, 9130924		LOC103690444
Tbx18	0.07	0.121	0.001	0.623	1.7225	0.193563	0.0015167	0.112373	Z-017075	Tbx18	gene		D:\assemblies\Rattus_norvegicus-Rnor_6.0-dbSNP149\Rattus_norvegicus-Rnor_6.0-dbSNP149.genometemplate\sequences\NC_005107_chr8.gbk#0	133307652	NC_005107.4	-	28010	95387363..95359354	315870, 1309856		Tbx18
Nt5e	0.052	0.051	0.353	0.001	0.988	54.0744	373.936	54.7311	Z-017079	Nt5e	gene		D:\assemblies\Rattus_norvegicus-Rnor_6.0-dbSNP149\Rattus_norvegicus-Rnor_6.0-dbSNP149.genometemplate\sequences\NC_005107_chr8.gbk#0	133307652	NC_005107.4	+	43732	95969002..96012733	58813, 61956		Nt5e	CD73, Nt5
LOC100910069	0.007	0.012	0.175	0.001	1.67481	13.2051	185.496	7.88453	Z-017084	LOC100910069	gene		D:\assemblies\Rattus_norvegicus-Rnor_6.0-dbSNP149\Rattus_norvegicus-Rnor_6.0-dbSNP149.genometemplate\sequences\NC_005107_chr8.gbk#0	133307652	NC_005107.4	-	90981	96329246..96238266	100910069, 6500498		LOC100910069
LOC501033	0.008	0.001	0.057	0.001	0.118262	1	60.1336	8.45582	Z-017092	LOC501033	gene		D:\assemblies\Rattus_norvegicus-Rnor_6.0-dbSNP149\Rattus_norvegicus-Rnor_6.0-dbSNP149.genometemplate\sequences\NC_005107_chr8.gbk#0	133307652	NC_005107.4	-	38132	97008687..96970556	501033, 1591930		LOC501033
LOC102546846	0.001	0.001	0.038	0.001	1	1	40.1957	1	Z-017093	LOC102546846	gene		D:\assemblies\Rattus_norvegicus-Rnor_6.0-dbSNP149\Rattus_norvegicus-Rnor_6.0-dbSNP149.genometemplate\sequences\NC_005107_chr8.gbk#0	133307652	NC_005107.4	-	7424	97059969..97052546	102546846, 7745978		LOC102546846
Paqr9	0.797	0.103	0.001	0.616	0.129686	0.167617	0.00153337	1.29248	Z-017133	Paqr9	gene		D:\assemblies\Rattus_norvegicus-Rnor_6.0-dbSNP149\Rattus_norvegicus-Rnor_6.0-dbSNP149.genometemplate\sequences\NC_005107_chr8.gbk#0	133307652	NC_005107.4	+	2297	103337472..103339768	315904, 1311515		Paqr9
Tfdp2	9.368	20.149	0.877	13.303	2.15081	1.51463	0.0658894	0.704216	Z-017142	Tfdp2	gene		D:\assemblies\Rattus_norvegicus-Rnor_6.0-dbSNP149\Rattus_norvegicus-Rnor_6.0-dbSNP149.genometemplate\sequences\NC_005107_chr8.gbk#0	133307652	NC_005107.4	+	140434	104040795..104181228	300947, 1305814		Tfdp2	Tcfdp2
Mras	6.402	10.414	0.241	9.523	1.62657	1.0936	0.0253543	0.672337	Z-017181	Mras	gene		D:\assemblies\Rattus_norvegicus-Rnor_6.0-dbSNP149\Rattus_norvegicus-Rnor_6.0-dbSNP149.genometemplate\sequences\NC_005107_chr8.gbk#0	133307652	NC_005107.4	-	27824	107656851..107629028	25482, 3111		Mras
Il20rb	0.347	0.112	0.001	0.127	0.321143	0.878277	0.00744245	2.73485	Z-017193	Il20rb	gene		D:\assemblies\Rattus_norvegicus-Rnor_6.0-dbSNP149\Rattus_norvegicus-Rnor_6.0-dbSNP149.genometemplate\sequences\NC_005107_chr8.gbk#0	133307652	NC_005107.4	-	32656	108778561..108745906	501043, 1566151		Il20rb	IL20R2, RGD1566151
Ephb1	0.004	0.001	0.1	0.001	0.210045	1	105.307	4.76089	Z-017204	Ephb1	gene		D:\assemblies\Rattus_norvegicus-Rnor_6.0-dbSNP149\Rattus_norvegicus-Rnor_6.0-dbSNP149.genometemplate\sequences\NC_005107_chr8.gbk#0	133307652	NC_005107.4	-	436240	110813193..110376954	24338, 2556		Ephb1	elk, Ephb2, Erk
Iqcf1	0.001	0.145	1.379	0.001	152.89	152.89	1458.92	1	Z-017268	Iqcf1	gene		D:\assemblies\Rattus_norvegicus-Rnor_6.0-dbSNP149\Rattus_norvegicus-Rnor_6.0-dbSNP149.genometemplate\sequences\NC_005107_chr8.gbk#0	133307652	NC_005107.4	+	3681	115191919..115195599	503227, 1565640		Iqcf1	RGD1565640
Dalrd3	2.578	4.184	38.161	3.975	1.62317	1.05261	9.59976	0.648489	Z-017342	Dalrd3	gene		D:\assemblies\Rattus_norvegicus-Rnor_6.0-dbSNP149\Rattus_norvegicus-Rnor_6.0-dbSNP149.genometemplate\sequences\NC_005107_chr8.gbk#0	133307652	NC_005107.4	+	2877	117355943..117358819	363146, 1359206		Dalrd3
P4htm	0.059	0.024	1.465	0.001	0.402727	24.9826	1550.25	62.0336	Z-017344	P4htm	gene		D:\assemblies\Rattus_norvegicus-Rnor_6.0-dbSNP149\Rattus_norvegicus-Rnor_6.0-dbSNP149.genometemplate\sequences\NC_005107_chr8.gbk#0	133307652	NC_005107.4	-	18381	117383275..117364895	301008, 1311848		P4htm
LOC108351779	0.001	0.001	1.352	0.001	1	1	1430	1	Z-017361	LOC108351779	gene		D:\assemblies\Rattus_norvegicus-Rnor_6.0-dbSNP149\Rattus_norvegicus-Rnor_6.0-dbSNP149.genometemplate\sequences\NC_005107_chr8.gbk#0	133307652	NC_005107.4	-	1429	117780182..117778754	108351779		LOC108351779
LOC100911725	0.039	0.068	0.001	0.376	1.74854	0.179413	0.00251094	0.102607	Z-017379	LOC100911725	gene		D:\assemblies\Rattus_norvegicus-Rnor_6.0-dbSNP149\Rattus_norvegicus-Rnor_6.0-dbSNP149.genometemplate\sequences\NC_005107_chr8.gbk#0	133307652	NC_005107.4	+	26248	118390023..118416270	100911725, 6491338		LOC100911725
LOC108351780	0.001	0.001	1.352	0.001	1	1	1430	1	Z-017381	LOC108351780	gene		D:\assemblies\Rattus_norvegicus-Rnor_6.0-dbSNP149\Rattus_norvegicus-Rnor_6.0-dbSNP149.genometemplate\sequences\NC_005107_chr8.gbk#0	133307652	NC_005107.4	-	1429	118419927..118418499	108351780		LOC108351780
Myl3	0.083	0.94	0.001	0.845	11.3357	1.11245	0.00111845	0.0981362	Z-017398	Myl3	gene		D:\assemblies\Rattus_norvegicus-Rnor_6.0-dbSNP149\Rattus_norvegicus-Rnor_6.0-dbSNP149.genometemplate\sequences\NC_005107_chr8.gbk#0	133307652	NC_005107.4	+	6145	119030852..119036996	24585, 3142		Myl3	MLClV, Mylc1v, rVMLC1
Tmie	0.147	8.224	0.001	5.054	55.9601	1.62728	0.000187014	0.0290793	Z-017406	Tmie	gene		D:\assemblies\Rattus_norvegicus-Rnor_6.0-dbSNP149\Rattus_norvegicus-Rnor_6.0-dbSNP149.genometemplate\sequences\NC_005107_chr8.gbk#0	133307652	NC_005107.4	-	14956	119157071..119142116	501061, 1562523		Tmie	RGD1562523
Ccr8	0.001	0.001	0.359	0.001	1	1	380.04	1	Z-017532	Ccr8	gene		D:\assemblies\Rattus_norvegicus-Rnor_6.0-dbSNP149\Rattus_norvegicus-Rnor_6.0-dbSNP149.genometemplate\sequences\NC_005107_chr8.gbk#0	133307652	NC_005107.4	+	2980	128779552..128782531	301066, 1304893		Ccr8
Ackr2	0.001	0.005	0.166	0.001	5.1726	5.1726	175.632	1	Z-017565	Ackr2	gene		D:\assemblies\Rattus_norvegicus-Rnor_6.0-dbSNP149\Rattus_norvegicus-Rnor_6.0-dbSNP149.genometemplate\sequences\NC_005107_chr8.gbk#0	133307652	NC_005107.4	+	17046	130526521..130543566	140473, 620323		Ackr2	Ccbp2, D6
Ccr9	0.001	0.001	1.284	0.001	1	1	1358.11	1	Z-017610	Ccr9	gene		D:\assemblies\Rattus_norvegicus-Rnor_6.0-dbSNP149\Rattus_norvegicus-Rnor_6.0-dbSNP149.genometemplate\sequences\NC_005107_chr8.gbk#0	133307652	NC_005107.4	+	14806	132827325..132842130	282832, 628750		Ccr9
Cxcr6	0.001	0.001	0.828	0.001	1	1	875.847	1	Z-017612	Cxcr6	gene		D:\assemblies\Rattus_norvegicus-Rnor_6.0-dbSNP149\Rattus_norvegicus-Rnor_6.0-dbSNP149.genometemplate\sequences\NC_005107_chr8.gbk#0	133307652	NC_005107.4	+	1055	132869712..132870766	100124593, 1642118		Cxcr6
Xcr1	0.001	0.001	0.619	0.001	1	1	655.194	1	Z-017613	Xcr1	gene		D:\assemblies\Rattus_norvegicus-Rnor_6.0-dbSNP149\Rattus_norvegicus-Rnor_6.0-dbSNP149.genometemplate\sequences\NC_005107_chr8.gbk#0	133307652	NC_005107.4	-	7637	132919110..132911474	301086, 1311480		Xcr1
LOC102554555	0.001	0.012	0.231	0.001	12.5173	12.5173	244.481	1	Z-017624	LOC102554555	gene		D:\assemblies\Rattus_norvegicus-Rnor_6.0-dbSNP149\Rattus_norvegicus-Rnor_6.0-dbSNP149.genometemplate\sequences\NC_005108_chr9.gbk#0	122095297	NC_005108.4	+	48658	771355..820012	102554555, 7657956		LOC102554555
LOC103693188	0.001	0.007	0.051	0.001	6.97169	6.97169	54.2948	1	Z-017630	LOC103693188	gene		D:\assemblies\Rattus_norvegicus-Rnor_6.0-dbSNP149\Rattus_norvegicus-Rnor_6.0-dbSNP149.genometemplate\sequences\NC_005108_chr9.gbk#0	122095297	NC_005108.4	+	12937	1786492..1799428	103693188, 9301354		LOC103693188
LOC108351868	0.001	0.001	0.057	0.001	1	1	60.4933	1	Z-017633	LOC108351868	gene		D:\assemblies\Rattus_norvegicus-Rnor_6.0-dbSNP149\Rattus_norvegicus-Rnor_6.0-dbSNP149.genometemplate\sequences\NC_005108_chr9.gbk#0	122095297	NC_005108.4	+	9786	2992139..3001924	108351868		LOC108351868
Gpr108	1.949	4.236	29.439	2.256	2.1731	1.87749	13.0484	0.863967	Z-017683	Gpr108	gene		D:\assemblies\Rattus_norvegicus-Rnor_6.0-dbSNP149\Rattus_norvegicus-Rnor_6.0-dbSNP149.genometemplate\sequences\NC_005108_chr9.gbk#0	122095297	NC_005108.4	+	10468	9704300..9714767	316136, 735149		Gpr108
Cd70	0.001	0.001	1.114	0.001	1	1	1178.59	1	Z-017686	Cd70	gene		D:\assemblies\Rattus_norvegicus-Rnor_6.0-dbSNP149\Rattus_norvegicus-Rnor_6.0-dbSNP149.genometemplate\sequences\NC_005108_chr9.gbk#0	122095297	NC_005108.4	+	3144	9842585..9845728	301132, 1588573		Cd70
Dennd1c	1.333	2.549	307.473	1.463	1.91253	1.74251	210.219	0.911102	Z-017692	Dennd1c	gene		D:\assemblies\Rattus_norvegicus-Rnor_6.0-dbSNP149\Rattus_norvegicus-Rnor_6.0-dbSNP149.genometemplate\sequences\NC_005108_chr9.gbk#0	122095297	NC_005108.4	+	6335	9976015..9982349	363326, 1590869		Dennd1c
LOC100362987	0.001	0.89	1.489	0.001	941.361	941.361	1575.64	1	Z-017725	LOC100362987	gene		D:\assemblies\Rattus_norvegicus-Rnor_6.0-dbSNP149\Rattus_norvegicus-Rnor_6.0-dbSNP149.genometemplate\sequences\NC_005108_chr9.gbk#0	122095297	NC_005108.4	-	322	10737845..10737524	100362987, 2323707		LOC100362987
LOC103693194	0.004	0.001	0.237	0.001	0.253219	1	250.801	3.94914	Z-017732	LOC103693194	gene		D:\assemblies\Rattus_norvegicus-Rnor_6.0-dbSNP149\Rattus_norvegicus-Rnor_6.0-dbSNP149.genometemplate\sequences\NC_005108_chr9.gbk#0	122095297	NC_005108.4	-	4656	10846432..10841777	103693194, 9462719		LOC103693194
Plin5	0.007	0.448	0.001	0.194	66.6137	2.3088	0.00487569	0.0346595	Z-017738	Plin5	gene		D:\assemblies\Rattus_norvegicus-Rnor_6.0-dbSNP149\Rattus_norvegicus-Rnor_6.0-dbSNP149.genometemplate\sequences\NC_005108_chr9.gbk#0	122095297	NC_005108.4	+	5770	10956013..10961782	501283, 1589602		Plin5	Oxpat
Mpnd	10.81	24.028	115.846	12.292	2.22286	1.95483	9.4247	0.87942	Z-017744	Mpnd	gene		D:\assemblies\Rattus_norvegicus-Rnor_6.0-dbSNP149\Rattus_norvegicus-Rnor_6.0-dbSNP149.genometemplate\sequences\NC_005108_chr9.gbk#0	122095297	NC_005108.4	-	6242	11061611..11055370	681944, 1589335		Mpnd
Pgc	0.001	0.001	0.72	0.001	1	1	761.326	1	Z-017803	Pgc	gene		D:\assemblies\Rattus_norvegicus-Rnor_6.0-dbSNP149\Rattus_norvegicus-Rnor_6.0-dbSNP149.genometemplate\sequences\NC_005108_chr9.gbk#0	122095297	NC_005108.4	-	8219	15274917..15266699	24864, 3943		Pgc	Pg-1, PG1, Upg1
LOC102554309	0.001	0.007	0.661	0.001	6.98196	6.98196	699.03	1	Z-017804	LOC102554309	gene		D:\assemblies\Rattus_norvegicus-Rnor_6.0-dbSNP149\Rattus_norvegicus-Rnor_6.0-dbSNP149.genometemplate\sequences\NC_005108_chr9.gbk#0	122095297	NC_005108.4	+	3501	15271008..15274508	102554309, 7710987		LOC102554309
Ccnd3	80.996	170.294	10.402	107.57	2.10249	1.5831	0.0966964	0.752963	Z-017811	Ccnd3	gene		D:\assemblies\Rattus_norvegicus-Rnor_6.0-dbSNP149\Rattus_norvegicus-Rnor_6.0-dbSNP149.genometemplate\sequences\NC_005108_chr9.gbk#0	122095297	NC_005108.4	-	6090	15410905..15404816	25193, 2293		Ccnd3
Crip3	0.001	0.001	0.842	0.001	1	1	890.687	1	Z-017854	Crip3	gene		D:\assemblies\Rattus_norvegicus-Rnor_6.0-dbSNP149\Rattus_norvegicus-Rnor_6.0-dbSNP149.genometemplate\sequences\NC_005108_chr9.gbk#0	122095297	NC_005108.4	-	2853	16934714..16931862	501100, 1565018		Crip3	RGD1565018
LOC102550162	0.004	0.001	0.045	0.001	0.221122	1	47.2132	4.5224	Z-017870	LOC102550162	gene		D:\assemblies\Rattus_norvegicus-Rnor_6.0-dbSNP149\Rattus_norvegicus-Rnor_6.0-dbSNP149.genometemplate\sequences\NC_005108_chr9.gbk#0	122095297	NC_005108.4	-	31853	17520119..17488267	102550162, 7526556		LOC102550162
LOC102549865	0.005	0.001	1.956	0.001	0.177999	1	2069.74	5.61802	Z-017914	LOC102549865	gene		D:\assemblies\Rattus_norvegicus-Rnor_6.0-dbSNP149\Rattus_norvegicus-Rnor_6.0-dbSNP149.genometemplate\sequences\NC_005108_chr9.gbk#0	122095297	NC_005108.4	-	798	20271138..20270341	102549865, 7594196		LOC102549865
LOC690044	0.001	0.01	0.501	0.001	11.0713	11.0713	529.662	1	Z-017928	LOC690044	gene		D:\assemblies\Rattus_norvegicus-Rnor_6.0-dbSNP149\Rattus_norvegicus-Rnor_6.0-dbSNP149.genometemplate\sequences\NC_005108_chr9.gbk#0	122095297	NC_005108.4	+	706	22089024..22089729	690044		LOC690044
Rhag	4.833	7.707	0.001	3.968	1.59455	1.94235	0.000238199	1.21812	Z-017936	Rhag	gene		D:\assemblies\Rattus_norvegicus-Rnor_6.0-dbSNP149\Rattus_norvegicus-Rnor_6.0-dbSNP149.genometemplate\sequences\NC_005108_chr9.gbk#0	122095297	NC_005108.4	-	27892	23493081..23465190	65207, 61871		Rhag	Rh50
LOC108351903	0.001	0.001	1	0.001	1	1	1058.24	1	Z-017977	LOC108351903	gene		D:\assemblies\Rattus_norvegicus-Rnor_6.0-dbSNP149\Rattus_norvegicus-Rnor_6.0-dbSNP149.genometemplate\sequences\NC_005108_chr9.gbk#0	122095297	NC_005108.4	-	6380	27423053..27416674	108351903		LOC108351903
LOC100912306	0.004	0.001	0.001	0.044	0.235752	0.0217173	0.0217173	0.092119	Z-018012	LOC100912306	gene		D:\assemblies\Rattus_norvegicus-Rnor_6.0-dbSNP149\Rattus_norvegicus-Rnor_6.0-dbSNP149.genometemplate\sequences\NC_005108_chr9.gbk#0	122095297	NC_005108.4	+	19565	37727934..37747498	100912306, 6487654		LOC100912306
LOC100912348	0.001	0.001	0.001	0.017	1	0.0542618	0.0542618	0.0542618	Z-018013	LOC100912348	gene		D:\assemblies\Rattus_norvegicus-Rnor_6.0-dbSNP149\Rattus_norvegicus-Rnor_6.0-dbSNP149.genometemplate\sequences\NC_005108_chr9.gbk#0	122095297	NC_005108.4	+	11992	37749031..37761022	100912348, 6487168		LOC100912348
Prss39	0.001	0.039	6.81	0.001	41.2759	41.2759	7205.79	1	Z-018026	Prss39	gene		D:\assemblies\Rattus_norvegicus-Rnor_6.0-dbSNP149\Rattus_norvegicus-Rnor_6.0-dbSNP149.genometemplate\sequences\NC_005108_chr9.gbk#0	122095297	NC_005108.4	+	13581	40999027..41012607	363215, 1309276		Prss39	Prss40, Tesp1, Tesp2
Rpl31	636.735	1569.66	9627.6	756.599	2.46517	2.07463	12.7248	0.841576	Z-018088	Rpl31	gene		D:\assemblies\Rattus_norvegicus-Rnor_6.0-dbSNP149\Rattus_norvegicus-Rnor_6.0-dbSNP149.genometemplate\sequences\NC_005108_chr9.gbk#0	122095297	NC_005108.4	+	3486	46086959..46090444	64298, 621202		Rpl31
Il1rl2	0.001	0.001	0.245	0.001	1	1	259.048	1	Z-018102	Il1rl2	gene		D:\assemblies\Rattus_norvegicus-Rnor_6.0-dbSNP149\Rattus_norvegicus-Rnor_6.0-dbSNP149.genometemplate\sequences\NC_005108_chr9.gbk#0	122095297	NC_005108.4	+	48810	47044870..47093679	171106, 621782		Il1rl2
LOC103690530	0.001	0.015	3.042	0.001	15.908	15.908	3218.4	1	Z-018131	LOC103690530	gene		D:\assemblies\Rattus_norvegicus-Rnor_6.0-dbSNP149\Rattus_norvegicus-Rnor_6.0-dbSNP149.genometemplate\sequences\NC_005108_chr9.gbk#0	122095297	NC_005108.4	-	14608	50091544..50076937	103690530, 9102722		LOC103690530
Slc40a1	64.837	133.634	2.706	82.672	2.06108	1.61643	0.032731	0.784265	Z-018151	Slc40a1 [2]	gene		D:\assemblies\Rattus_norvegicus-Rnor_6.0-dbSNP149\Rattus_norvegicus-Rnor_6.0-dbSNP149.genometemplate\sequences\NC_005108_chr9.gbk#0	122095297	NC_005108.4	-	18968	52913267..52894300	108348131		Slc40a1
Ankar	0.001	0.027	0.091	0.001	28.2061	28.2061	95.8145	1	Z-018153	Ankar	gene		D:\assemblies\Rattus_norvegicus-Rnor_6.0-dbSNP149\Rattus_norvegicus-Rnor_6.0-dbSNP149.genometemplate\sequences\NC_005108_chr9.gbk#0	122095297	NC_005108.4	+	74618	53011561..53086178	501138, 1561071		Ankar
Sdpr	20.798	31.991	1.797	23.98	1.53819	1.33403	0.0749195	0.867277	Z-018175	Sdpr	gene		D:\assemblies\Rattus_norvegicus-Rnor_6.0-dbSNP149\Rattus_norvegicus-Rnor_6.0-dbSNP149.genometemplate\sequences\NC_005108_chr9.gbk#0	122095297	NC_005108.4	-	12018	55256153..55244136	316384, 1359345		Sdpr
Tyw5	1.636	3.585	11.824	1.435	2.19078	2.49772	8.23816	1.1401	Z-018212	Tyw5	gene		D:\assemblies\Rattus_norvegicus-Rnor_6.0-dbSNP149\Rattus_norvegicus-Rnor_6.0-dbSNP149.genometemplate\sequences\NC_005108_chr9.gbk#0	122095297	NC_005108.4	-	18425	64096265..64077841	301419, 1311269		Tyw5	C2orf60, RGD1311269
LOC108351936	0.001	0.066	0.276	0.001	70.0108	70.0108	292.476	1	Z-018218	LOC108351936	gene		D:\assemblies\Rattus_norvegicus-Rnor_6.0-dbSNP149\Rattus_norvegicus-Rnor_6.0-dbSNP149.genometemplate\sequences\NC_005108_chr9.gbk#0	122095297	NC_005108.4	-	378	64704617..64704240	108351936		LOC108351936
Als2cr12	0.001	0.001	0.392	0.001	1	1	414.251	1	Z-018240	Als2cr12	gene		D:\assemblies\Rattus_norvegicus-Rnor_6.0-dbSNP149\Rattus_norvegicus-Rnor_6.0-dbSNP149.genometemplate\sequences\NC_005108_chr9.gbk#0	122095297	NC_005108.4	-	28160	65693822..65665663	316413, 1359362		Als2cr12
Trak2	100.372	133.038	2.03	123.952	1.32545	1.0733	0.0163736	0.80976	Z-018241	Trak2	gene		D:\assemblies\Rattus_norvegicus-Rnor_6.0-dbSNP149\Rattus_norvegicus-Rnor_6.0-dbSNP149.genometemplate\sequences\NC_005108_chr9.gbk#0	122095297	NC_005108.4	-	64646	65763351..65698706	171086, 620915		Trak2	Als2cr3, GRIF-1
Stradb	8.014	15.714	0.728	13.677	1.96076	1.14895	0.0531963	0.585971	Z-018242	Stradb	gene		D:\assemblies\Rattus_norvegicus-Rnor_6.0-dbSNP149\Rattus_norvegicus-Rnor_6.0-dbSNP149.genometemplate\sequences\NC_005108_chr9.gbk#0	122095297	NC_005108.4	+	19077	65763437..65782513	501146, 1559449		Stradb	Als2cr2, RGD1559449
Mpp4	0.005	0.009	0.746	0.001	1.81553	9.04808	788.874	4.98372	Z-018246	Mpp4	gene		D:\assemblies\Rattus_norvegicus-Rnor_6.0-dbSNP149\Rattus_norvegicus-Rnor_6.0-dbSNP149.genometemplate\sequences\NC_005108_chr9.gbk#0	122095297	NC_005108.4	-	43358	65961274..65917917	58808, 620016		Mpp4	Dlg6
Cd28	0.399	0.006	0.367	0.001	0.014807	6.24474	388.575	421.742	Z-018264	Cd28	gene		D:\assemblies\Rattus_norvegicus-Rnor_6.0-dbSNP149\Rattus_norvegicus-Rnor_6.0-dbSNP149.genometemplate\sequences\NC_005108_chr9.gbk#0	122095297	NC_005108.4	+	27451	67546408..67573858	25660, 2299		Cd28	CD28RNA
Ctla4	0.001	0.001	0.827	0.001	1	1	874.554	1	Z-018266	Ctla4	gene		D:\assemblies\Rattus_norvegicus-Rnor_6.0-dbSNP149\Rattus_norvegicus-Rnor_6.0-dbSNP149.genometemplate\sequences\NC_005108_chr9.gbk#0	122095297	NC_005108.4	+	6672	67699397..67706068	63835, 61975		Ctla4	Cd152, CTLA-4, sCTLA4
LOC100360841	259.236	898.14	5791.34	477.933	3.46456	1.87922	12.1175	0.542412	Z-018276	LOC100360841	gene		D:\assemblies\Rattus_norvegicus-Rnor_6.0-dbSNP149\Rattus_norvegicus-Rnor_6.0-dbSNP149.genometemplate\sequences\NC_005108_chr9.gbk#0	122095297	NC_005108.4	+	371	69790829..69791199	100360841, 2321317		LOC100360841
Fzd5	0.055	0.109	0.001	1.084	1.96969	0.100498	0.000872217	0.0510222	Z-018302	Fzd5	gene		D:\assemblies\Rattus_norvegicus-Rnor_6.0-dbSNP149\Rattus_norvegicus-Rnor_6.0-dbSNP149.genometemplate\sequences\NC_005108_chr9.gbk#0	122095297	NC_005108.4	-	1758	71445541..71443784	317674, 631406		Fzd5
Crygd	0.042	0.138	0.509	0.001	3.27564	146.312	538.528	44.6666	Z-018308	Crygd	gene		D:\assemblies\Rattus_norvegicus-Rnor_6.0-dbSNP149\Rattus_norvegicus-Rnor_6.0-dbSNP149.genometemplate\sequences\NC_005108_chr9.gbk#0	122095297	NC_005108.4	-	1756	71778323..71776568	24278, 2422		Crygd	Cryg4, Len
LOC102555358	0.001	0.001	0.114	0.001	1	1	120.772	1	Z-018347	LOC102555358	gene		D:\assemblies\Rattus_norvegicus-Rnor_6.0-dbSNP149\Rattus_norvegicus-Rnor_6.0-dbSNP149.genometemplate\sequences\NC_005108_chr9.gbk#0	122095297	NC_005108.4	+	16197	79802926..79819122	102555358, 7624990		LOC102555358
Igfbp5	15.661	13.809	0.4	23.547	0.881715	0.586438	0.016974	0.665111	Z-018353	Igfbp5	gene		D:\assemblies\Rattus_norvegicus-Rnor_6.0-dbSNP149\Rattus_norvegicus-Rnor_6.0-dbSNP149.genometemplate\sequences\NC_005108_chr9.gbk#0	122095297	NC_005108.4	-	12584	80166813..80154230	25285, 2876		Igfbp5	IGF-BP5
Vil1	0.004	0.022	0.067	0.001	5.07512	23.7076	70.97	4.67135	Z-018378	Vil1	gene		D:\assemblies\Rattus_norvegicus-Rnor_6.0-dbSNP149\Rattus_norvegicus-Rnor_6.0-dbSNP149.genometemplate\sequences\NC_005108_chr9.gbk#0	122095297	NC_005108.4	+	27822	81689802..81717623	316521, 1307048		Vil1	Vil
Resp18	0.001	0.008	7.155	0.001	8.44529	8.44529	7570.23	1	Z-018412	Resp18	gene		D:\assemblies\Rattus_norvegicus-Rnor_6.0-dbSNP149\Rattus_norvegicus-Rnor_6.0-dbSNP149.genometemplate\sequences\NC_005108_chr9.gbk#0	122095297	NC_005108.4	-	6343	82477136..82470794	50561, 3555		Resp18
LOC108349347	0.006	0.001	2.182	0.001	0.149337	1	2308.46	6.69626	Z-018428	LOC108349347	gene		D:\assemblies\Rattus_norvegicus-Rnor_6.0-dbSNP149\Rattus_norvegicus-Rnor_6.0-dbSNP149.genometemplate\sequences\NC_005108_chr9.gbk#0	122095297	NC_005108.4	+	7984	83335475..83343458	108349347		LOC108349347
Rnf11l2	4.303	7.574	0.205	5.152	1.7604	1.47027	0.039809	0.835189	Z-018454	Rnf11l2	gene		D:\assemblies\Rattus_norvegicus-Rnor_6.0-dbSNP149\Rattus_norvegicus-Rnor_6.0-dbSNP149.genometemplate\sequences\NC_005108_chr9.gbk#0	122095297	NC_005108.4	-	1827	86654074..86652248	316552, 1306139		Rnf11l2
LOC108351962	0.001	0.001	0.229	0.001	1	1	241.812	1	Z-018462	LOC108351962	gene		D:\assemblies\Rattus_norvegicus-Rnor_6.0-dbSNP149\Rattus_norvegicus-Rnor_6.0-dbSNP149.genometemplate\sequences\NC_005108_chr9.gbk#0	122095297	NC_005108.4	+	7624	88137538..88145161	108351962		LOC108351962
Ccl20	0.001	0.001	1.919	0.001	1	1	2030.08	1	Z-018475	Ccl20	gene		D:\assemblies\Rattus_norvegicus-Rnor_6.0-dbSNP149\Rattus_norvegicus-Rnor_6.0-dbSNP149.genometemplate\sequences\NC_005108_chr9.gbk#0	122095297	NC_005108.4	+	2659	88918359..88921017	29538, 3646		Ccl20	Scya20, ST38
Nmur1	0.001	0.007	0.225	0.001	7.41744	7.41744	237.934	1	Z-018518	Nmur1	gene		D:\assemblies\Rattus_norvegicus-Rnor_6.0-dbSNP149\Rattus_norvegicus-Rnor_6.0-dbSNP149.genometemplate\sequences\NC_005108_chr9.gbk#0	122095297	NC_005108.4	-	4394	93407264..93402871	65276, 619867		Nmur1	Gpr66, Nmu-r1
Alpp	0.001	0.03	0.109	0.001	31.8396	31.8396	114.88	1	Z-018528	Alpp	gene		D:\assemblies\Rattus_norvegicus-Rnor_6.0-dbSNP149\Rattus_norvegicus-Rnor_6.0-dbSNP149.genometemplate\sequences\NC_005108_chr9.gbk#0	122095297	NC_005108.4	-	3094	94193054..94189961	100359675, 2325055		Alpp
Chrng	0.001	0.005	0.379	0.001	5.49274	5.49274	400.831	1	Z-018534	Chrng	gene		D:\assemblies\Rattus_norvegicus-Rnor_6.0-dbSNP149\Rattus_norvegicus-Rnor_6.0-dbSNP149.genometemplate\sequences\NC_005108_chr9.gbk#0	122095297	NC_005108.4	+	6374	94302218..94308591	25753, 2354		Chrng	ACHRG
Kcnj13	0.001	0.001	0.176	0.001	1	1	186.335	1	Z-018538	Kcnj13	gene		D:\assemblies\Rattus_norvegicus-Rnor_6.0-dbSNP149\Rattus_norvegicus-Rnor_6.0-dbSNP149.genometemplate\sequences\NC_005108_chr9.gbk#0	122095297	NC_005108.4	-	8615	94495333..94486719	94341, 621661		Kcnj13	Kir7.1
Gbx2	0.001	0.001	0.417	0.001	1	1	441.27	1	Z-018574	Gbx2	gene		D:\assemblies\Rattus_norvegicus-Rnor_6.0-dbSNP149\Rattus_norvegicus-Rnor_6.0-dbSNP149.genometemplate\sequences\NC_005108_chr9.gbk#0	122095297	NC_005108.4	-	2591	97065855..97063265	114500, 621866		Gbx2
LOC102555030	0.196	0.846	0.001	0.28	4.32074	3.02708	0.0033813	0.700593	Z-018580	LOC102555030	gene		D:\assemblies\Rattus_norvegicus-Rnor_6.0-dbSNP149\Rattus_norvegicus-Rnor_6.0-dbSNP149.genometemplate\sequences\NC_005108_chr9.gbk#0	122095297	NC_005108.4	+	13995	97398685..97412679	102555030, 7705608		LOC102555030
LOC102555145	0.048	0.001	0.108	0.001	0.0197462	1	113.757	50.6426	Z-018582	LOC102555145	gene		D:\assemblies\Rattus_norvegicus-Rnor_6.0-dbSNP149\Rattus_norvegicus-Rnor_6.0-dbSNP149.genometemplate\sequences\NC_005108_chr9.gbk#0	122095297	NC_005108.4	-	21535	97552654..97531120	102555145, 7593803		LOC102555145
LOC108351974	0.001	0.001	1.484	0.001	1	1	1570.28	1	Z-018607	LOC108351974	gene		D:\assemblies\Rattus_norvegicus-Rnor_6.0-dbSNP149\Rattus_norvegicus-Rnor_6.0-dbSNP149.genometemplate\sequences\NC_005108_chr9.gbk#0	122095297	NC_005108.4	+	44071	99368073..99412143	108351974		LOC108351974
LOC102553020	0.005	0.02	0.001	0.105	3.70209	0.185651	0.00897729	0.0501475	Z-018673	LOC102553020	gene		D:\assemblies\Rattus_norvegicus-Rnor_6.0-dbSNP149\Rattus_norvegicus-Rnor_6.0-dbSNP149.genometemplate\sequences\NC_005108_chr9.gbk#0	122095297	NC_005108.4	+	11502	104350375..104361876	102553020, 7610058		LOC102553020
Efna5	0.703	0.155	0.001	0.408	0.220883	0.380651	0.00231536	1.72331	Z-018692	Efna5	gene		D:\assemblies\Rattus_norvegicus-Rnor_6.0-dbSNP149\Rattus_norvegicus-Rnor_6.0-dbSNP149.genometemplate\sequences\NC_005108_chr9.gbk#0	122095297	NC_005108.4	-	275877	110329878..110054002	116683, 620391		Efna5	Lerk7
LOC108351984	0.001	0.001	0.113	0.001	1	1	119.543	1	Z-018745	LOC108351984	gene		D:\assemblies\Rattus_norvegicus-Rnor_6.0-dbSNP149\Rattus_norvegicus-Rnor_6.0-dbSNP149.genometemplate\sequences\NC_005108_chr9.gbk#0	122095297	NC_005108.4	+	5373	114504198..114509570	108351984		LOC108351984
Ppidl1	1.269	4.809	14.826	1.733	3.78984	2.77498	8.5555	0.732216	Z-018789	Ppidl1	gene		D:\assemblies\Rattus_norvegicus-Rnor_6.0-dbSNP149\Rattus_norvegicus-Rnor_6.0-dbSNP149.genometemplate\sequences\NC_005108_chr9.gbk#0	122095297	NC_005108.4	+	1274	121456762..121458035	501204, 1560149		Ppidl1
LOC102550127	0.001	0.001	1.817	0.001	1	1	1922.41	1	Z-018795	LOC102550127	gene		D:\assemblies\Rattus_norvegicus-Rnor_6.0-dbSNP149\Rattus_norvegicus-Rnor_6.0-dbSNP149.genometemplate\sequences\NC_005108_chr9.gbk#0	122095297	NC_005108.4	+	18522	121979260..121997781	102550127, 7571709		LOC102550127
LOC679822	0.001	0.001	0.736	0.001	1	1	779.153	1	Z-018816	LOC679822	gene		D:\assemblies\Rattus_norvegicus-Rnor_6.0-dbSNP149\Rattus_norvegicus-Rnor_6.0-dbSNP149.genometemplate\sequences\NC_005109_chr10.gbk#0	112626471	NC_005109.4	+	2952	1404877..1407828	679822, 1583666		LOC679822
LOC688708	0.004	0.007	0.256	0.001	1.95425	7.91406	271.123	4.04967	Z-018825	LOC688708	gene		D:\assemblies\Rattus_norvegicus-Rnor_6.0-dbSNP149\Rattus_norvegicus-Rnor_6.0-dbSNP149.genometemplate\sequences\NC_005109_chr10.gbk#0	112626471	NC_005109.4	-	69148	1809530..1740383	688708, 1585299		LOC688708
Tnfrsf17	0.001	0.001	18.233	0.001	1	1	19291.5	1	Z-018845	Tnfrsf17	gene		D:\assemblies\Rattus_norvegicus-Rnor_6.0-dbSNP149\Rattus_norvegicus-Rnor_6.0-dbSNP149.genometemplate\sequences\NC_005109_chr10.gbk#0	112626471	NC_005109.4	-	6239	4258335..4252097	287034, 1304703		Tnfrsf17
Zc3h7a	2.982	5.307	39.032	3.376	1.77968	1.5717	11.5603	0.883137	Z-018854	Zc3h7a	gene		D:\assemblies\Rattus_norvegicus-Rnor_6.0-dbSNP149\Rattus_norvegicus-Rnor_6.0-dbSNP149.genometemplate\sequences\NC_005109_chr10.gbk#0	112626471	NC_005109.4	+	39993	4535651..4575643	360466, 1311225		Zc3h7a	Zc3hdc7
LOC102552269	0.015	0.004	0.246	0.001	0.268178	4.3798	260.269	16.3317	Z-018860	LOC102552269	gene		D:\assemblies\Rattus_norvegicus-Rnor_6.0-dbSNP149\Rattus_norvegicus-Rnor_6.0-dbSNP149.genometemplate\sequences\NC_005109_chr10.gbk#0	112626471	NC_005109.4	+	25075	4775665..4800739	102552269, 7618014		LOC102552269
LOC108352052	0.001	0.004	1.489	0.001	4.56416	4.56416	1575.54	1	Z-018863	LOC108352052	gene		D:\assemblies\Rattus_norvegicus-Rnor_6.0-dbSNP149\Rattus_norvegicus-Rnor_6.0-dbSNP149.genometemplate\sequences\NC_005109_chr10.gbk#0	112626471	NC_005109.4	+	3108	4878261..4881368	108352052		LOC108352052
Rpl39l	3.397	12.144	0.001	3.936	3.57536	3.08531	0.000240112	0.862936	Z-018880	Rpl39l	gene		D:\assemblies\Rattus_norvegicus-Rnor_6.0-dbSNP149\Rattus_norvegicus-Rnor_6.0-dbSNP149.genometemplate\sequences\NC_005109_chr10.gbk#0	112626471	NC_005109.4	-	4116	5533695..5529580	497860, 1561345		Rpl39l
Mettl22	0.377	2.562	28.448	1.404	6.80267	1.82467	20.2648	0.268229	Z-018900	Mettl22	gene		D:\assemblies\Rattus_norvegicus-Rnor_6.0-dbSNP149\Rattus_norvegicus-Rnor_6.0-dbSNP149.genometemplate\sequences\NC_005109_chr10.gbk#0	112626471	NC_005109.4	-	17472	7240822..7223351	287054, 1311433		Mettl22
LOC108352213	0.001	0.008	0.568	0.001	8.62094	8.62094	601.464	1	Z-018907	LOC108352213	gene		D:\assemblies\Rattus_norvegicus-Rnor_6.0-dbSNP149\Rattus_norvegicus-Rnor_6.0-dbSNP149.genometemplate\sequences\NC_005109_chr10.gbk#0	112626471	NC_005109.4	-	3298	10515714..10512417	108352213		LOC108352213
Sec14l5	0.495	0.324	0.001	0.756	0.655048	0.429042	0.00124982	0.654978	Z-018912	Sec14l5	gene		D:\assemblies\Rattus_norvegicus-Rnor_6.0-dbSNP149\Rattus_norvegicus-Rnor_6.0-dbSNP149.genometemplate\sequences\NC_005109_chr10.gbk#0	112626471	NC_005109.4	-	40988	10629942..10588955	287060, 1564638		Sec14l5	RGD1564638
LOC108352057	0.001	0.031	0.091	0.001	33.2579	33.2579	96.2805	1	Z-018926	LOC108352057	gene		D:\assemblies\Rattus_norvegicus-Rnor_6.0-dbSNP149\Rattus_norvegicus-Rnor_6.0-dbSNP149.genometemplate\sequences\NC_005109_chr10.gbk#0	112626471	NC_005109.4	+	4990	10901407..10906396	108352057		LOC108352057
LOC108352058	0.001	0.001	0.087	0.001	1	1	92.0399	1	Z-018948	LOC108352058	gene		D:\assemblies\Rattus_norvegicus-Rnor_6.0-dbSNP149\Rattus_norvegicus-Rnor_6.0-dbSNP149.genometemplate\sequences\NC_005109_chr10.gbk#0	112626471	NC_005109.4	-	8470	11816843..11808374	108352058		LOC108352058
LOC103690212	0.001	0.001	0.621	0.001	1	1	657.133	1	Z-018954	LOC103690212	gene		D:\assemblies\Rattus_norvegicus-Rnor_6.0-dbSNP149\Rattus_norvegicus-Rnor_6.0-dbSNP149.genometemplate\sequences\NC_005109_chr10.gbk#0	112626471	NC_005109.4	+	2167	11888987..11891153	103690212, 9350506		LOC103690212
Olr1366	0.001	0.001	0.109	0.001	1	1	115.711	1	Z-018971	Olr1366	gene		D:\assemblies\Rattus_norvegicus-Rnor_6.0-dbSNP149\Rattus_norvegicus-Rnor_6.0-dbSNP149.genometemplate\sequences\NC_005109_chr10.gbk#0	112626471	NC_005109.4	-	11765	12477715..12465951	405335, 1332862		Olr1366	tpcr13
RGD1561157	1.109	3.71	0.257	3.212	3.34646	1.15507	0.0800863	0.345163	Z-019008	RGD1561157	gene		D:\assemblies\Rattus_norvegicus-Rnor_6.0-dbSNP149\Rattus_norvegicus-Rnor_6.0-dbSNP149.genometemplate\sequences\NC_005109_chr10.gbk#0	112626471	NC_005109.4	+	925	13084304..13085228	360487, 1561157		RGD1561157
Dnase1l2	0.001	0.042	0.78	0.001	44.7887	44.7887	825.532	1	Z-019038	Dnase1l2	gene		D:\assemblies\Rattus_norvegicus-Rnor_6.0-dbSNP149\Rattus_norvegicus-Rnor_6.0-dbSNP149.genometemplate\sequences\NC_005109_chr10.gbk#0	112626471	NC_005109.4	-	2180	13814514..13812335	681124, 1583566		Dnase1l2
Meiob	0.001	0.001	0.215	0.001	1	1	227.153	1	Z-019065	Meiob	gene		D:\assemblies\Rattus_norvegicus-Rnor_6.0-dbSNP149\Rattus_norvegicus-Rnor_6.0-dbSNP149.genometemplate\sequences\NC_005109_chr10.gbk#0	112626471	NC_005109.4	+	31382	14174645..14206026	685099, 1583204		Meiob
RGD1559662	5.897	8.637	0.001	4.284	1.46463	2.01618	0.000220625	1.37658	Z-019095	RGD1559662	gene		D:\assemblies\Rattus_norvegicus-Rnor_6.0-dbSNP149\Rattus_norvegicus-Rnor_6.0-dbSNP149.genometemplate\sequences\NC_005109_chr10.gbk#0	112626471	NC_005109.4	+	2580	14688518..14691097	501679, 1559662		RGD1559662
Rhbdl1	0.031	0.082	0.114	0.001	2.62932	86.3143	120.481	32.8276	Z-019123	Rhbdl1	gene		D:\assemblies\Rattus_norvegicus-Rnor_6.0-dbSNP149\Rattus_norvegicus-Rnor_6.0-dbSNP149.genometemplate\sequences\NC_005109_chr10.gbk#0	112626471	NC_005109.4	-	4354	15205856..15201503	117025, 620699		Rhbdl1	Rhbdl
Hba-a1	140.293	358.788	2.113	159.752	2.55741	2.24591	0.0132259	0.878196	Z-019141	Hba-a1	gene		D:\assemblies\Rattus_norvegicus-Rnor_6.0-dbSNP149\Rattus_norvegicus-Rnor_6.0-dbSNP149.genometemplate\sequences\NC_005109_chr10.gbk#0	112626471	NC_005109.4	-	729	15577977..15577249	287167, 1359209		Hba-a1	GloA
Hba2	7724.91	20209.9	23.564	9476.34	2.6162	2.13267	0.00248665	0.815179	Z-019142	Hba2	gene		D:\assemblies\Rattus_norvegicus-Rnor_6.0-dbSNP149\Rattus_norvegicus-Rnor_6.0-dbSNP149.genometemplate\sequences\NC_005109_chr10.gbk#0	112626471	NC_005109.4	-	844	15590207..15589364	360504, 1359364		Hba2
Hba1	13915.6	35684.7	26.793	17253.2	2.56437	2.06829	0.0015529	0.806549	Z-019144	Hba1	gene		D:\assemblies\Rattus_norvegicus-Rnor_6.0-dbSNP149\Rattus_norvegicus-Rnor_6.0-dbSNP149.genometemplate\sequences\NC_005109_chr10.gbk#0	112626471	NC_005109.4	-	856	15603649..15602794	25632, 2782		Hba1	Hba-a1, Hba-a2, HBAM
Efcab9	0.001	0.001	0.774	0.001	1	1	818.464	1	Z-019177	Efcab9	gene		D:\assemblies\Rattus_norvegicus-Rnor_6.0-dbSNP149\Rattus_norvegicus-Rnor_6.0-dbSNP149.genometemplate\sequences\NC_005109_chr10.gbk#0	112626471	NC_005109.4	-	7625	17406915..17399291	688481, 1588807		Efcab9
LOC100911628	0.001	0.001	0.319	0.001	1	1	337.995	1	Z-019178	LOC100911628	gene		D:\assemblies\Rattus_norvegicus-Rnor_6.0-dbSNP149\Rattus_norvegicus-Rnor_6.0-dbSNP149.genometemplate\sequences\NC_005109_chr10.gbk#0	112626471	NC_005109.4	-	7697	17415611..17407915	100911628, 6491503		LOC100911628
Kcnip1	0.001	0.013	0.001	0.705	13.5329	0.0181378	0.00134027	0.00134027	Z-019191	Kcnip1	gene		D:\assemblies\Rattus_norvegicus-Rnor_6.0-dbSNP149\Rattus_norvegicus-Rnor_6.0-dbSNP149.genometemplate\sequences\NC_005109_chr10.gbk#0	112626471	NC_005109.4	-	384550	18942677..18558128	65023, 70886		Kcnip1	Kchip1
Fam196b	0.001	0.043	0.15	0.001	45.8059	45.8059	158.71	1	Z-019200	Fam196b	gene		D:\assemblies\Rattus_norvegicus-Rnor_6.0-dbSNP149\Rattus_norvegicus-Rnor_6.0-dbSNP149.genometemplate\sequences\NC_005109_chr10.gbk#0	112626471	NC_005109.4	+	121259	19270956..19392214	100361460, 2320105		Fam196b
Fbll1	0.001	0.001	0.27	0.001	1	1	285.515	1	Z-019209	Fbll1	gene		D:\assemblies\Rattus_norvegicus-Rnor_6.0-dbSNP149\Rattus_norvegicus-Rnor_6.0-dbSNP149.genometemplate\sequences\NC_005109_chr10.gbk#0	112626471	NC_005109.4	-	1644	20622600..20620957	363563, 1562841		Fbll1	RGD1562841
Gabra1	0.097	0.053	0.001	0.441	0.542201	0.119633	0.00214494	0.220643	Z-019234	Gabra1	gene		D:\assemblies\Rattus_norvegicus-Rnor_6.0-dbSNP149\Rattus_norvegicus-Rnor_6.0-dbSNP149.genometemplate\sequences\NC_005109_chr10.gbk#0	112626471	NC_005109.4	-	61085	27371802..27310718	29705, 61855		Gabra1
Fabp6	0.001	0.001	1.74	0.001	1	1	1840.9	1	Z-019246	Fabp6	gene		D:\assemblies\Rattus_norvegicus-Rnor_6.0-dbSNP149\Rattus_norvegicus-Rnor_6.0-dbSNP149.genometemplate\sequences\NC_005109_chr10.gbk#0	112626471	NC_005109.4	-	4973	29196593..29191621	25440, 2592		Fabp6	IBABP
Itk	0.001	0.001	1.645	0.001	1	1	1740.94	1	Z-019271	Itk	gene		D:\assemblies\Rattus_norvegicus-Rnor_6.0-dbSNP149\Rattus_norvegicus-Rnor_6.0-dbSNP149.genometemplate\sequences\NC_005109_chr10.gbk#0	112626471	NC_005109.4	-	61594	31493413..31431820	363577, 1311618		Itk
LOC103693326	0.001	0.009	0.213	0.001	9.18523	9.18523	225.151	1	Z-019391	LOC103693326	gene		D:\assemblies\Rattus_norvegicus-Rnor_6.0-dbSNP149\Rattus_norvegicus-Rnor_6.0-dbSNP149.genometemplate\sequences\NC_005109_chr10.gbk#0	112626471	NC_005109.4	-	5594	37569294..37563701	103693326, 9397746		LOC103693326
Tcf7	1.237	0.1	28.74	0.489	0.0808544	0.204322	58.7167	2.52704	Z-019393	Tcf7	gene		D:\assemblies\Rattus_norvegicus-Rnor_6.0-dbSNP149\Rattus_norvegicus-Rnor_6.0-dbSNP149.genometemplate\sequences\NC_005109_chr10.gbk#0	112626471	NC_005109.4	-	29995	37646027..37616033	363595, 1305894		Tcf7
Sowaha	1.118	0.252	0.1	2.191	0.225287	0.115018	0.0458459	0.510539	Z-019411	Sowaha	gene		D:\assemblies\Rattus_norvegicus-Rnor_6.0-dbSNP149\Rattus_norvegicus-Rnor_6.0-dbSNP149.genometemplate\sequences\NC_005109_chr10.gbk#0	112626471	NC_005109.4	-	2775	38838932..38836158	497903, 1564616		Sowaha
RGD1308564	0.206	0.067	0.001	0.173	0.325364	0.388771	0.00547853	1.19488	Z-019477	RGD1308564	gene		D:\assemblies\Rattus_norvegicus-Rnor_6.0-dbSNP149\Rattus_norvegicus-Rnor_6.0-dbSNP149.genometemplate\sequences\NC_005109_chr10.gbk#0	112626471	NC_005109.4	+	17419	43715911..43733329	287305, 1308564		RGD1308564
Lypd8	0.001	0.005	0.613	0.001	5.56502	5.56502	648.493	1	Z-019484	Lypd8	gene		D:\assemblies\Rattus_norvegicus-Rnor_6.0-dbSNP149\Rattus_norvegicus-Rnor_6.0-dbSNP149.genometemplate\sequences\NC_005109_chr10.gbk#0	112626471	NC_005109.4	+	11040	43817773..43828812	691259, 1586251		Lypd8
LOC24906	18.012	39.901	0.25	18.311	2.21528	2.17907	0.013646	0.983654	Z-019487	LOC24906	gene		D:\assemblies\Rattus_norvegicus-Rnor_6.0-dbSNP149\Rattus_norvegicus-Rnor_6.0-dbSNP149.genometemplate\sequences\NC_005109_chr10.gbk#0	112626471	NC_005109.4	+	8922	43871628..43880549	24906, 3683		LOC24906	DMT-1
Fam183b	6.468	20.598	0.001	7.233	3.18453	2.84795	0.000130675	0.894307	Z-019522	Fam183b	gene		D:\assemblies\Rattus_norvegicus-Rnor_6.0-dbSNP149\Rattus_norvegicus-Rnor_6.0-dbSNP149.genometemplate\sequences\NC_005109_chr10.gbk#0	112626471	NC_005109.4	-	10361	44746907..44736547	287346, 1561932		Fam183b
Btnl10	0.9	0.699	0.001	1.59	0.775972	0.439478	0.000594488	0.566357	Z-019540	Btnl10	gene		D:\assemblies\Rattus_norvegicus-Rnor_6.0-dbSNP149\Rattus_norvegicus-Rnor_6.0-dbSNP149.genometemplate\sequences\NC_005109_chr10.gbk#0	112626471	NC_005109.4	+	8288	45257946..45266233	497912, 1559732		Btnl10
LOC102549418	0.001	0.005	1.114	0.001	5.50156	5.50156	1178.45	1	Z-019578	LOC102549418	gene		D:\assemblies\Rattus_norvegicus-Rnor_6.0-dbSNP149\Rattus_norvegicus-Rnor_6.0-dbSNP149.genometemplate\sequences\NC_005109_chr10.gbk#0	112626471	NC_005109.4	-	15884	46473572..46457689	102549418, 7593322		LOC102549418
Trpv2	0.369	0.914	9.676	0.408	2.47896	2.24206	23.7261	0.904436	Z-019632	Trpv2	gene		D:\assemblies\Rattus_norvegicus-Rnor_6.0-dbSNP149\Rattus_norvegicus-Rnor_6.0-dbSNP149.genometemplate\sequences\NC_005109_chr10.gbk#0	112626471	NC_005109.4	+	21497	48903540..48925036	29465, 3965		Trpv2	Vrl1
LOC102554726	0.005	0.024	0.001	0.114	5.25621	0.210933	0.00829474	0.0401302	Z-019663	LOC102554726	gene		D:\assemblies\Rattus_norvegicus-Rnor_6.0-dbSNP149\Rattus_norvegicus-Rnor_6.0-dbSNP149.genometemplate\sequences\NC_005109_chr10.gbk#0	112626471	NC_005109.4	-	6299	53468541..53462243	102554726, 7616564		LOC102554726
Myh3	0.001	0.006	0.15	0.001	6.58752	6.58752	158.548	1	Z-019669	Myh3	gene		D:\assemblies\Rattus_norvegicus-Rnor_6.0-dbSNP149\Rattus_norvegicus-Rnor_6.0-dbSNP149.genometemplate\sequences\NC_005109_chr10.gbk#0	112626471	NC_005109.4	+	23820	53621375..53645194	24583, 3138		Myh3	Myhse, RNMHCG
Rpl26	809.578	1838.44	14290.4	1005.21	2.27087	1.82892	14.2164	0.805385	Z-019697	Rpl26	gene		D:\assemblies\Rattus_norvegicus-Rnor_6.0-dbSNP149\Rattus_norvegicus-Rnor_6.0-dbSNP149.genometemplate\sequences\NC_005109_chr10.gbk#0	112626471	NC_005109.4	+	3131	55492417..55495547	287417, 1310607		Rpl26
Tmem102	0.001	0.001	0.679	0.001	1	1	717.919	1	Z-019749	Tmem102	gene		D:\assemblies\Rattus_norvegicus-Rnor_6.0-dbSNP149\Rattus_norvegicus-Rnor_6.0-dbSNP149.genometemplate\sequences\NC_005109_chr10.gbk#0	112626471	NC_005109.4	-	2257	56413154..56410898	497937, 1559450		Tmem102
Acap1	2.506	4.17	316.91	3.433	1.66445	1.21482	92.313	0.729861	Z-019759	Acap1	gene		D:\assemblies\Rattus_norvegicus-Rnor_6.0-dbSNP149\Rattus_norvegicus-Rnor_6.0-dbSNP149.genometemplate\sequences\NC_005109_chr10.gbk#0	112626471	NC_005109.4	-	14147	56506446..56492300	287443, 1305360		Acap1	Centb1
Alox12	17.106	46.716	0.292	20.603	2.73098	2.26748	0.014195	0.830282	Z-019787	Alox12	gene		D:\assemblies\Rattus_norvegicus-Rnor_6.0-dbSNP149\Rattus_norvegicus-Rnor_6.0-dbSNP149.genometemplate\sequences\NC_005109_chr10.gbk#0	112626471	NC_005109.4	-	12316	56864049..56851734	287454, 1311159		Alox12	12-LO, 12S-LOX
Alox15	4.009	10.688	0.091	5.491	2.66618	1.94628	0.0166233	0.729988	Z-019789	Alox15	gene		D:\assemblies\Rattus_norvegicus-Rnor_6.0-dbSNP149\Rattus_norvegicus-Rnor_6.0-dbSNP149.genometemplate\sequences\NC_005109_chr10.gbk#0	112626471	NC_005109.4	-	8454	56962145..56953692	81639, 70493		Alox15	12-LOX, 15-LOX, Alox12, Alox12l
Eno3	1.671	2.341	41.605	0.785	1.40073	2.98166	53.0021	2.12865	Z-019807	Eno3	gene		D:\assemblies\Rattus_norvegicus-Rnor_6.0-dbSNP149\Rattus_norvegicus-Rnor_6.0-dbSNP149.genometemplate\sequences\NC_005109_chr10.gbk#0	112626471	NC_005109.4	+	5391	57278271..57283661	25438, 2555		Eno3	BBE, MSE
Wscd1	0.895	0.147	0.001	1.542	0.164226	0.0952785	0.000612931	0.580166	Z-019829	Wscd1	gene		D:\assemblies\Rattus_norvegicus-Rnor_6.0-dbSNP149\Rattus_norvegicus-Rnor_6.0-dbSNP149.genometemplate\sequences\NC_005109_chr10.gbk#0	112626471	NC_005109.4	+	42256	58330711..58372966	287466, 1308212		Wscd1	RGD1308212
Spata22	0.001	0.001	0.307	0.001	1	1	324.658	1	Z-019872	Spata22	gene		D:\assemblies\Rattus_norvegicus-Rnor_6.0-dbSNP149\Rattus_norvegicus-Rnor_6.0-dbSNP149.genometemplate\sequences\NC_005109_chr10.gbk#0	112626471	NC_005109.4	+	17706	59893064..59910769	360565, 1565378		Spata22	RGD1565378, Sgn
Coro6	0.038	0.001	0.249	0.001	0.0249736	1	263.109	40.0423	Z-019955	Coro6	gene		D:\assemblies\Rattus_norvegicus-Rnor_6.0-dbSNP149\Rattus_norvegicus-Rnor_6.0-dbSNP149.genometemplate\sequences\NC_005109_chr10.gbk#0	112626471	NC_005109.4	-	8707	62700658..62691952	245982, 708560		Coro6
LOC100360781	182.597	368.775	3207.71	189.057	2.01961	1.9506	16.9669	0.965831	Z-019988	LOC100360781	gene		D:\assemblies\Rattus_norvegicus-Rnor_6.0-dbSNP149\Rattus_norvegicus-Rnor_6.0-dbSNP149.genometemplate\sequences\NC_005109_chr10.gbk#0	112626471	NC_005109.4	+	397	64336162..64336558	100360781, 2321477		LOC100360781
Rpl23a	566.536	1336.11	7276.69	708.156	2.35839	1.88675	10.2755	0.800015	Z-020022	Rpl23a	gene		D:\assemblies\Rattus_norvegicus-Rnor_6.0-dbSNP149\Rattus_norvegicus-Rnor_6.0-dbSNP149.genometemplate\sequences\NC_005109_chr10.gbk#0	112626471	NC_005109.4	-	2687	65443981..65441295	360572, 1304897		Rpl23a
Slc13a2	0.045	0.023	0.143	0.001	0.503029	24.153	150.891	48.0151	Z-020034	Slc13a2	gene		D:\assemblies\Rattus_norvegicus-Rnor_6.0-dbSNP149\Rattus_norvegicus-Rnor_6.0-dbSNP149.genometemplate\sequences\NC_005109_chr10.gbk#0	112626471	NC_005109.4	-	27382	65692046..65664665	65202, 61920		Slc13a2	mucin, Nadc1
Ccl7	0.001	0.01	6.273	0.001	10.2654	10.2654	6637.31	1	Z-020103	Ccl7	gene		D:\assemblies\Rattus_norvegicus-Rnor_6.0-dbSNP149\Rattus_norvegicus-Rnor_6.0-dbSNP149.genometemplate\sequences\NC_005109_chr10.gbk#0	112626471	NC_005109.4	+	1851	69423083..69424933	287561, 1359152		Ccl7
LOC108352112	0.084	0.175	0.001	0.107	2.09399	1.63254	0.00880805	0.779631	Z-020105	LOC108352112	gene		D:\assemblies\Rattus_norvegicus-Rnor_6.0-dbSNP149\Rattus_norvegicus-Rnor_6.0-dbSNP149.genometemplate\sequences\NC_005109_chr10.gbk#0	112626471	NC_005109.4	-	8859	69470696..69461838	108352112		LOC108352112
Unc45b	0.001	0.022	0.044	0.001	22.8652	22.8652	46.7357	1	Z-020120	Unc45b	gene		D:\assemblies\Rattus_norvegicus-Rnor_6.0-dbSNP149\Rattus_norvegicus-Rnor_6.0-dbSNP149.genometemplate\sequences\NC_005109_chr10.gbk#0	112626471	NC_005109.4	+	28106	70262340..70290445	303373, 1305666		Unc45b	Cmya4
Slfn14	3.216	4.882	0.001	4.144	1.51814	1.17804	0.000228056	0.775975	Z-020129	Slfn14	gene		D:\assemblies\Rattus_norvegicus-Rnor_6.0-dbSNP149\Rattus_norvegicus-Rnor_6.0-dbSNP149.genometemplate\sequences\NC_005109_chr10.gbk#0	112626471	NC_005109.4	-	11471	70504810..70493340	287569, 1561538		Slfn14
Ccl4	0.061	0.11	4.973	0.001	1.81515	116.578	5261.86	64.2249	Z-020145	Ccl4	gene		D:\assemblies\Rattus_norvegicus-Rnor_6.0-dbSNP149\Rattus_norvegicus-Rnor_6.0-dbSNP149.genometemplate\sequences\NC_005109_chr10.gbk#0	112626471	NC_005109.4	+	15432	70870926..70886357	116637, 620441		Ccl4	Mip1-b, Scya4
Pigw	0.061	0.111	4.892	0.464	1.82142	0.239694	10.5443	0.131598	Z-020167	Pigw	gene		D:\assemblies\Rattus_norvegicus-Rnor_6.0-dbSNP149\Rattus_norvegicus-Rnor_6.0-dbSNP149.genometemplate\sequences\NC_005109_chr10.gbk#0	112626471	NC_005109.4	-	3642	72198415..72194774	378774, 727962		Pigw
Mpo	38.288	69.961	0.078	39.592	1.82721	1.76706	0.00196185	0.967077	Z-020211	Mpo	gene		D:\assemblies\Rattus_norvegicus-Rnor_6.0-dbSNP149\Rattus_norvegicus-Rnor_6.0-dbSNP149.genometemplate\sequences\NC_005109_chr10.gbk#0	112626471	NC_005109.4	+	10369	75087892..75098260	303413, 1592081		Mpo
LOC102557601	0.001	0.001	1.699	0.001	1	1	1797.53	1	Z-020233	LOC102557601	gene		D:\assemblies\Rattus_norvegicus-Rnor_6.0-dbSNP149\Rattus_norvegicus-Rnor_6.0-dbSNP149.genometemplate\sequences\NC_005109_chr10.gbk#0	112626471	NC_005109.4	-	1619	76262962..76261344	102557601, 7496505		LOC102557601
LOC102546327	0.001	0.006	0.444	0.001	6.53807	6.53807	470.019	1	Z-020309	LOC102546327	gene		D:\assemblies\Rattus_norvegicus-Rnor_6.0-dbSNP149\Rattus_norvegicus-Rnor_6.0-dbSNP149.genometemplate\sequences\NC_005109_chr10.gbk#0	112626471	NC_005109.4	+	12614	82887943..82900556	102546327, 7668130		LOC102546327
LOC102547047	1.474	0.32	0.001	2.038	0.217143	0.157043	0.000463781	0.723226	Z-020324	LOC102547047	gene		D:\assemblies\Rattus_norvegicus-Rnor_6.0-dbSNP149\Rattus_norvegicus-Rnor_6.0-dbSNP149.genometemplate\sequences\NC_005109_chr10.gbk#0	112626471	NC_005109.4	-	51776	83636404..83584629	102547047, 7503123		LOC102547047
Igf2bp1	0.006	0.412	0.001	0.168	72.2934	2.4474	0.00561445	0.0338537	Z-020335	Igf2bp1	gene		D:\assemblies\Rattus_norvegicus-Rnor_6.0-dbSNP149\Rattus_norvegicus-Rnor_6.0-dbSNP149.genometemplate\sequences\NC_005109_chr10.gbk#0	112626471	NC_005109.4	-	49146	83823323..83774178	303477, 708580		Igf2bp1	Imp1, ZBP1
Hoxb9	1.519	0.186	0.186	1.675	0.122696	0.111245	0.11116	0.906672	Z-020346	Hoxb9	gene		D:\assemblies\Rattus_norvegicus-Rnor_6.0-dbSNP149\Rattus_norvegicus-Rnor_6.0-dbSNP149.genometemplate\sequences\NC_005109_chr10.gbk#0	112626471	NC_005109.4	+	5192	84119772..84124963	287647, 1306158		Hoxb9
LOC102547278	0.005	0.007	0.166	0.001	1.46322	7.43105	175.151	5.07857	Z-020374	LOC102547278	gene		D:\assemblies\Rattus_norvegicus-Rnor_6.0-dbSNP149\Rattus_norvegicus-Rnor_6.0-dbSNP149.genometemplate\sequences\NC_005109_chr10.gbk#0	112626471	NC_005109.4	+	9938	84915531..84925468	102547278, 7592610		LOC102547278
Tbx21	0.008	0.006	1.354	0.001	0.679693	5.85194	1432.52	8.60968	Z-020381	Tbx21	gene		D:\assemblies\Rattus_norvegicus-Rnor_6.0-dbSNP149\Rattus_norvegicus-Rnor_6.0-dbSNP149.genometemplate\sequences\NC_005109_chr10.gbk#0	112626471	NC_005109.4	-	16533	85049331..85032799	303496, 1308264		Tbx21
Arhgap23	6.024	5.812	0.4	6.205	0.964762	0.936585	0.0643918	0.970794	Z-020391	Arhgap23	gene		D:\assemblies\Rattus_norvegicus-Rnor_6.0-dbSNP149\Rattus_norvegicus-Rnor_6.0-dbSNP149.genometemplate\sequences\NC_005109_chr10.gbk#0	112626471	NC_005109.4	+	58587	85387219..85445805	303501, 1309742		Arhgap23
LOC100910455	156.991	442.744	3644.97	196.184	2.82019	2.25678	18.5793	0.800222	Z-020406	LOC100910455	gene		D:\assemblies\Rattus_norvegicus-Rnor_6.0-dbSNP149\Rattus_norvegicus-Rnor_6.0-dbSNP149.genometemplate\sequences\NC_005109_chr10.gbk#0	112626471	NC_005109.4	+	711	85864574..85865284	100910455, 6498778		LOC100910455
Tns4	0.024	0.151	0.001	0.17	6.37057	0.887596	0.00554806	0.139328	Z-020449	Tns4	gene		D:\assemblies\Rattus_norvegicus-Rnor_6.0-dbSNP149\Rattus_norvegicus-Rnor_6.0-dbSNP149.genometemplate\sequences\NC_005109_chr10.gbk#0	112626471	NC_005109.4	-	23753	87001256..86977504	303517, 1310402		Tns4	RGD1310402
Krt20	0.001	0.001	0.708	0.001	1	1	749.551	1	Z-020461	Krt20	gene		D:\assemblies\Rattus_norvegicus-Rnor_6.0-dbSNP149\Rattus_norvegicus-Rnor_6.0-dbSNP149.genometemplate\sequences\NC_005109_chr10.gbk#0	112626471	NC_005109.4	-	8532	87351045..87342514	286912, 628646		Krt20	Krt21
LOC103695157	0.001	0.001	0.411	0.001	1	1	434.44	1	Z-020462	LOC103695157	gene		D:\assemblies\Rattus_norvegicus-Rnor_6.0-dbSNP149\Rattus_norvegicus-Rnor_6.0-dbSNP149.genometemplate\sequences\NC_005109_chr10.gbk#0	112626471	NC_005109.4	+	3840	87343875..87347714	103695157, 9463945		LOC103695157
Krt23	0.001	0.001	2.739	0.001	1	1	2898.42	1	Z-020463	Krt23	gene		D:\assemblies\Rattus_norvegicus-Rnor_6.0-dbSNP149\Rattus_norvegicus-Rnor_6.0-dbSNP149.genometemplate\sequences\NC_005109_chr10.gbk#0	112626471	NC_005109.4	-	16012	87407634..87391623	287678, 1308838		Krt23	Ka23, Krt1-23
Krt31	0.004	0.044	0.148	0.001	10.9503	46.7326	157.078	4.26769	Z-020502	Krt31	gene		D:\assemblies\Rattus_norvegicus-Rnor_6.0-dbSNP149\Rattus_norvegicus-Rnor_6.0-dbSNP149.genometemplate\sequences\NC_005109_chr10.gbk#0	112626471	NC_005109.4	-	3769	87962891..87959123	450228, 1359411		Krt31	Ka25
Ptrf	49.349	68.748	3.282	62.902	1.39309	1.09293	0.0521793	0.784541	Z-020544	Ptrf	gene		D:\assemblies\Rattus_norvegicus-Rnor_6.0-dbSNP149\Rattus_norvegicus-Rnor_6.0-dbSNP149.genometemplate\sequences\NC_005109_chr10.gbk#0	112626471	NC_005109.4	-	11983	88874495..88862513	287710, 1307685		Ptrf
Cd300lg	0.001	0.001	0.358	0.001	1	1	378.616	1	Z-020595	Cd300lg	gene		D:\assemblies\Rattus_norvegicus-Rnor_6.0-dbSNP149\Rattus_norvegicus-Rnor_6.0-dbSNP149.genometemplate\sequences\NC_005109_chr10.gbk#0	112626471	NC_005109.4	+	19144	89976478..89995621	684984, 1584376		Cd300lg
Mpp2	0.646	0.126	0.001	0.621	0.19545	0.203262	0.00152077	1.03997	Z-020596	Mpp2	gene		D:\assemblies\Rattus_norvegicus-Rnor_6.0-dbSNP149\Rattus_norvegicus-Rnor_6.0-dbSNP149.genometemplate\sequences\NC_005109_chr10.gbk#0	112626471	NC_005109.4	-	32483	90030766..89998284	85275, 620014		Mpp2	Dlg2
Kif18b	3.406	4.44	0.398	3.914	1.30362	1.13454	0.101698	0.870295	Z-020636	Kif18b	gene		D:\assemblies\Rattus_norvegicus-Rnor_6.0-dbSNP149\Rattus_norvegicus-Rnor_6.0-dbSNP149.genometemplate\sequences\NC_005109_chr10.gbk#0	112626471	NC_005109.4	-	19467	91027760..91008294	303575, 1310360		Kif18b	RGD1310360
LOC108352144	0.001	0.057	0.001	0.426	60.5736	0.134374	0.00221836	0.00221836	Z-020684	LOC108352144	gene		D:\assemblies\Rattus_norvegicus-Rnor_6.0-dbSNP149\Rattus_norvegicus-Rnor_6.0-dbSNP149.genometemplate\sequences\NC_005109_chr10.gbk#0	112626471	NC_005109.4	+	37441	93679044..93716484	108352144		LOC108352144
LOC102546698	0.001	0.145	0.818	0.001	153.615	153.615	865.186	1	Z-020712	LOC102546698	gene		D:\assemblies\Rattus_norvegicus-Rnor_6.0-dbSNP149\Rattus_norvegicus-Rnor_6.0-dbSNP149.genometemplate\sequences\NC_005109_chr10.gbk#0	112626471	NC_005109.4	+	1177	94695692..94696868	102546698, 7650056		LOC102546698
Cep95	1.517	2.115	45.804	1.946	1.39433	1.08706	23.5416	0.779625	Z-020720	Cep95	gene		D:\assemblies\Rattus_norvegicus-Rnor_6.0-dbSNP149\Rattus_norvegicus-Rnor_6.0-dbSNP149.genometemplate\sequences\NC_005109_chr10.gbk#0	112626471	NC_005109.4	+	29413	94988362..95017774	287766, 1309655		Cep95	Ccdc45, RGD1309655
Rpl38	169.003	462.84	5643.68	212.005	2.73865	2.18315	26.6205	0.797164	Z-020798	Rpl38	gene		D:\assemblies\Rattus_norvegicus-Rnor_6.0-dbSNP149\Rattus_norvegicus-Rnor_6.0-dbSNP149.genometemplate\sequences\NC_005109_chr10.gbk#0	112626471	NC_005109.4	+	3636	103198424..103202059	689284, 1305573		Rpl38
Cd300lb	0.826	0.253	0.001	1.065	0.306647	0.23782	0.000887513	0.77555	Z-020809	Cd300lb	gene		D:\assemblies\Rattus_norvegicus-Rnor_6.0-dbSNP149\Rattus_norvegicus-Rnor_6.0-dbSNP149.genometemplate\sequences\NC_005109_chr10.gbk#0	112626471	NC_005109.4	-	9990	103481071..103471082	501738, 1583718		Cd300lb	CD300b
Grin2c	0.004	0.001	0.284	0.001	0.268162	1	300.75	3.72909	Z-020821	Grin2c	gene		D:\assemblies\Rattus_norvegicus-Rnor_6.0-dbSNP149\Rattus_norvegicus-Rnor_6.0-dbSNP149.genometemplate\sequences\NC_005109_chr10.gbk#0	112626471	NC_005109.4	-	18634	103816923..103798290	24411, 2739		Grin2c	GluN2C, NR2C
Nt5c	3.997	8.567	142.937	7.971	2.14362	1.07479	17.9319	0.50139	Z-020835	Nt5c	gene		D:\assemblies\Rattus_norvegicus-Rnor_6.0-dbSNP149\Rattus_norvegicus-Rnor_6.0-dbSNP149.genometemplate\sequences\NC_005109_chr10.gbk#0	112626471	NC_005109.4	-	1999	104054805..104052807	100360582, 2321875		Nt5c	Umph2
Ube2o	5.621	9.86	0.461	7.152	1.75422	1.3786	0.0644897	0.785875	Z-020896	Ube2o	gene		D:\assemblies\Rattus_norvegicus-Rnor_6.0-dbSNP149\Rattus_norvegicus-Rnor_6.0-dbSNP149.genometemplate\sequences\NC_005109_chr10.gbk#0	112626471	NC_005109.4	-	47447	105553167..105505721	303689, 1310297		Ube2o
Tmc6	3.047	3.539	38.708	2.321	1.16161	1.52512	16.6799	1.31293	Z-020925	Tmc6	gene		D:\assemblies\Rattus_norvegicus-Rnor_6.0-dbSNP149\Rattus_norvegicus-Rnor_6.0-dbSNP149.genometemplate\sequences\NC_005109_chr10.gbk#0	112626471	NC_005109.4	-	16148	106783004..106766857	688280, 1591146		Tmc6
Cep295nl	0.001	0.005	0.079	0.001	5.36098	5.36098	83.3921	1	Z-020942	Cep295nl	gene		D:\assemblies\Rattus_norvegicus-Rnor_6.0-dbSNP149\Rattus_norvegicus-Rnor_6.0-dbSNP149.genometemplate\sequences\NC_005109_chr10.gbk#0	112626471	NC_005109.4	-	17770	107381280..107363511	498028, 1597046		Cep295nl	Ddc8
LOC103693490	0.004	0.01	0.141	0.001	2.74174	10.2843	149.013	3.75101	Z-020955	LOC103693490	gene		D:\assemblies\Rattus_norvegicus-Rnor_6.0-dbSNP149\Rattus_norvegicus-Rnor_6.0-dbSNP149.genometemplate\sequences\NC_005109_chr10.gbk#0	112626471	NC_005109.4	+	11746	108197615..108209360	103693490, 9098104		LOC103693490
Npb	0.001	0.013	9.372	0.001	13.8388	13.8388	9916.45	1	Z-021010	Npb	gene		D:\assemblies\Rattus_norvegicus-Rnor_6.0-dbSNP149\Rattus_norvegicus-Rnor_6.0-dbSNP149.genometemplate\sequences\NC_005109_chr10.gbk#0	112626471	NC_005109.4	+	435	109786222..109786656	259222, 708513		Npb
Hexdc	0.907	0.132	25.013	0.856	0.146118	0.154831	29.2335	1.05963	Z-021042	Hexdc	gene		D:\assemblies\Rattus_norvegicus-Rnor_6.0-dbSNP149\Rattus_norvegicus-Rnor_6.0-dbSNP149.genometemplate\sequences\NC_005109_chr10.gbk#0	112626471	NC_005109.4	+	18612	110406431..110425042	100216475, 2302323		Hexdc
Fn3krp	3.707	13.818	0.732	9.308	3.72759	1.48462	0.078662	0.398278	Z-021048	Fn3krp	gene		D:\assemblies\Rattus_norvegicus-Rnor_6.0-dbSNP149\Rattus_norvegicus-Rnor_6.0-dbSNP149.genometemplate\sequences\NC_005109_chr10.gbk#0	112626471	NC_005109.4	+	7887	110614739..110622625	303755, 1304570		Fn3krp	RGD1304570
Fn3k	5.193	11.595	0.001	7.678	2.23285	1.51021	0.000123095	0.676359	Z-021049	Fn3k	gene		D:\assemblies\Rattus_norvegicus-Rnor_6.0-dbSNP149\Rattus_norvegicus-Rnor_6.0-dbSNP149.genometemplate\sequences\NC_005109_chr10.gbk#0	112626471	NC_005109.4	+	15801	110626462..110642262	498034, 1559983		Fn3k	Fnsk
Htr1f	0.001	0.001	0.24	0.001	1	1	254.171	1	Z-021074	Htr1f	gene		D:\assemblies\Rattus_norvegicus-Rnor_6.0-dbSNP149\Rattus_norvegicus-Rnor_6.0-dbSNP149.genometemplate\sequences\NC_005110_chr11.gbk#0	90463843	NC_005110.4	-	1401	1983513..1982113	60448, 71083		Htr1f	Htr1eb
LOC108352370	0.001	0.043	0.165	0.001	44.9849	44.9849	175.034	1	Z-021085	LOC108352370	gene		D:\assemblies\Rattus_norvegicus-Rnor_6.0-dbSNP149\Rattus_norvegicus-Rnor_6.0-dbSNP149.genometemplate\sequences\NC_005110_chr11.gbk#0	90463843	NC_005110.4	-	676	8398229..8397554	108352370		LOC108352370
LOC103693505	1.166	1.935	14.129	1.438	1.65936	1.34549	9.82641	0.810849	Z-021097	LOC103693505	gene		D:\assemblies\Rattus_norvegicus-Rnor_6.0-dbSNP149\Rattus_norvegicus-Rnor_6.0-dbSNP149.genometemplate\sequences\NC_005110_chr11.gbk#0	90463843	NC_005110.4	+	5149	14160888..14166036	103693505, 9148102		LOC103693505
Mir155hg	0.001	0.037	9.413	0.001	38.7437	38.7437	9959.91	1	Z-021131	Mir155hg	gene		D:\assemblies\Rattus_norvegicus-Rnor_6.0-dbSNP149\Rattus_norvegicus-Rnor_6.0-dbSNP149.genometemplate\sequences\NC_005110_chr11.gbk#0	90463843	NC_005110.4	+	2230	24175417..24177646	105841163, 10045371		Mir155hg	Bic
Mrap	0.001	0.098	0.001	0.869	103.7	0.112732	0.0010871	0.0010871	Z-021218	Mrap	gene		D:\assemblies\Rattus_norvegicus-Rnor_6.0-dbSNP149\Rattus_norvegicus-Rnor_6.0-dbSNP149.genometemplate\sequences\NC_005110_chr11.gbk#0	90463843	NC_005110.4	+	10493	30904733..30915225	288271, 1310648		Mrap	RGD1310648
RGD1562726	0.001	0.01	0.001	0.833	10.6836	0.0121179	0.00113425	0.00113425	Z-021224	RGD1562726	gene		D:\assemblies\Rattus_norvegicus-Rnor_6.0-dbSNP149\Rattus_norvegicus-Rnor_6.0-dbSNP149.genometemplate\sequences\NC_005110_chr11.gbk#0	90463843	NC_005110.4	-	17930	31238495..31220566	498060, 1562726		RGD1562726
Son	2.94	4.387	31.034	3.535	1.49194	1.24108	8.77997	0.831856	Z-021237	Son	gene		D:\assemblies\Rattus_norvegicus-Rnor_6.0-dbSNP149\Rattus_norvegicus-Rnor_6.0-dbSNP149.genometemplate\sequences\NC_005110_chr11.gbk#0	90463843	NC_005110.4	+	31172	31806598..31837769	304092, 1309013		Son
LOC102548079	0.001	0.001	0.037	0.001	1	1	39.2554	1	Z-021245	LOC102548079	gene		D:\assemblies\Rattus_norvegicus-Rnor_6.0-dbSNP149\Rattus_norvegicus-Rnor_6.0-dbSNP149.genometemplate\sequences\NC_005110_chr11.gbk#0	90463843	NC_005110.4	-	5929	32379615..32373687	102548079, 7555402		LOC102548079
LOC102550239	0.024	0.043	0.001	0.102	1.81515	0.423161	0.00922082	0.233127	Z-021294	LOC102550239	gene		D:\assemblies\Rattus_norvegicus-Rnor_6.0-dbSNP149\Rattus_norvegicus-Rnor_6.0-dbSNP149.genometemplate\sequences\NC_005110_chr11.gbk#0	90463843	NC_005110.4	+	18831	35053590..35072420	102550239, 7642969		LOC102550239
B3galt5	0.001	0.034	0.211	0.001	35.6504	35.6504	222.856	1	Z-021310	B3galt5	gene		D:\assemblies\Rattus_norvegicus-Rnor_6.0-dbSNP149\Rattus_norvegicus-Rnor_6.0-dbSNP149.genometemplate\sequences\NC_005110_chr11.gbk#0	90463843	NC_005110.4	+	45849	36638067..36683915	288161, 1306727		B3galt5
Fam3b	0.052	0.001	0.001	0.245	0.018227	0.00385661	0.00385661	0.211588	Z-021321	Fam3b	gene		D:\assemblies\Rattus_norvegicus-Rnor_6.0-dbSNP149\Rattus_norvegicus-Rnor_6.0-dbSNP149.genometemplate\sequences\NC_005110_chr11.gbk#0	90463843	NC_005110.4	-	70972	37993279..37922308	304050, 1311662		Fam3b	RGD1311662
LOC103693529	0.001	0.001	0.076	0.001	1	1	80.8852	1	Z-021332	LOC103693529	gene		D:\assemblies\Rattus_norvegicus-Rnor_6.0-dbSNP149\Rattus_norvegicus-Rnor_6.0-dbSNP149.genometemplate\sequences\NC_005110_chr11.gbk#0	90463843	NC_005110.4	+	2450	38606743..38609192	103693529, 9341576		LOC103693529
LOC681177	0.001	0.062	3.03	0.001	65.3132	65.3132	3206.25	1	Z-021336	LOC681177	gene		D:\assemblies\Rattus_norvegicus-Rnor_6.0-dbSNP149\Rattus_norvegicus-Rnor_6.0-dbSNP149.genometemplate\sequences\NC_005110_chr11.gbk#0	90463843	NC_005110.4	+	15796	38873174..38888969	681177		LOC681177
Gpr15	0.001	0.006	0.32	0.001	6.64686	6.64686	338.594	1	Z-021389	Gpr15	gene		D:\assemblies\Rattus_norvegicus-Rnor_6.0-dbSNP149\Rattus_norvegicus-Rnor_6.0-dbSNP149.genometemplate\sequences\NC_005110_chr11.gbk#0	90463843	NC_005110.4	+	11451	43992739..44004189	288181, 1306639		Gpr15
St3gal6	2.397	4.718	28.583	3.439	1.96806	1.37176	8.31144	0.697012	Z-021394	St3gal6	gene		D:\assemblies\Rattus_norvegicus-Rnor_6.0-dbSNP149\Rattus_norvegicus-Rnor_6.0-dbSNP149.genometemplate\sequences\NC_005110_chr11.gbk#0	90463843	NC_005110.4	+	60602	44176518..44237119	304023, 1303279		St3gal6	Siat10
LOC108352324	0.006	0.005	0.001	0.096	0.860923	0.0568009	0.00981348	0.0659767	Z-021399	LOC108352324	gene		D:\assemblies\Rattus_norvegicus-Rnor_6.0-dbSNP149\Rattus_norvegicus-Rnor_6.0-dbSNP149.genometemplate\sequences\NC_005110_chr11.gbk#0	90463843	NC_005110.4	-	105161	44753210..44648050	108352324		LOC108352324
Tmem30c	0.001	0.001	0.185	0.001	1	1	196.114	1	Z-021404	Tmem30c	gene		D:\assemblies\Rattus_norvegicus-Rnor_6.0-dbSNP149\Rattus_norvegicus-Rnor_6.0-dbSNP149.genometemplate\sequences\NC_005110_chr11.gbk#0	90463843	NC_005110.4	+	18994	45337502..45356495	288175, 1306090		Tmem30c	RGD1306090
LOC102548829	0.031	0.001	0.001	0.378	0.0302789	0.00250051	0.00250051	0.0825826	Z-021449	LOC102548829	gene		D:\assemblies\Rattus_norvegicus-Rnor_6.0-dbSNP149\Rattus_norvegicus-Rnor_6.0-dbSNP149.genometemplate\sequences\NC_005110_chr11.gbk#0	90463843	NC_005110.4	-	28869	52838816..52809948	102548829, 7583323		LOC102548829
Trat1	0.001	0.001	9.632	0.001	1	1	10190.9	1	Z-021468	Trat1	gene		D:\assemblies\Rattus_norvegicus-Rnor_6.0-dbSNP149\Rattus_norvegicus-Rnor_6.0-dbSNP149.genometemplate\sequences\NC_005110_chr11.gbk#0	90463843	NC_005110.4	+	42116	54619169..54661284	498075, 1563011		Trat1
Morc1	0.001	0.001	0.949	0.001	1	1	1004.52	1	Z-021469	Morc1	gene		D:\assemblies\Rattus_norvegicus-Rnor_6.0-dbSNP149\Rattus_norvegicus-Rnor_6.0-dbSNP149.genometemplate\sequences\NC_005110_chr11.gbk#0	90463843	NC_005110.4	-	281928	55044581..54762654	360712, 1565610		Morc1	Morc, RGD1565610
LOC683282	0.009	1.893	0.001	0.656	215.41	2.8835	0.00143968	0.0133861	Z-021471	LOC683282	gene		D:\assemblies\Rattus_norvegicus-Rnor_6.0-dbSNP149\Rattus_norvegicus-Rnor_6.0-dbSNP149.genometemplate\sequences\NC_005110_chr11.gbk#0	90463843	NC_005110.4	-	13609	55226328..55212720	683282, 1589201		LOC683282
Cd96	0.007	0.001	16.078	0.001	0.12879	1	17011.9	7.7646	Z-021477	Cd96	gene		D:\assemblies\Rattus_norvegicus-Rnor_6.0-dbSNP149\Rattus_norvegicus-Rnor_6.0-dbSNP149.genometemplate\sequences\NC_005110_chr11.gbk#0	90463843	NC_005110.4	+	75099	57108757..57183855	498079, 1565249		Cd96
Btla	0.047	0.115	8.79	0.275	2.43303	0.418197	31.9319	0.171883	Z-021502	Btla	gene		D:\assemblies\Rattus_norvegicus-Rnor_6.0-dbSNP149\Rattus_norvegicus-Rnor_6.0-dbSNP149.genometemplate\sequences\NC_005110_chr11.gbk#0	90463843	NC_005110.4	-	23543	60547234..60523692	407756, 1303280		Btla
Sidt1	0.001	0.001	0.279	0.001	1	1	295.233	1	Z-021517	Sidt1	gene		D:\assemblies\Rattus_norvegicus-Rnor_6.0-dbSNP149\Rattus_norvegicus-Rnor_6.0-dbSNP149.genometemplate\sequences\NC_005110_chr11.gbk#0	90463843	NC_005110.4	+	96081	61320480..61416560	288109, 1559616		Sidt1
Tigit	0.001	0.005	5.07	0.001	5.7031	5.7031	5364.48	1	Z-021532	Tigit	gene		D:\assemblies\Rattus_norvegicus-Rnor_6.0-dbSNP149\Rattus_norvegicus-Rnor_6.0-dbSNP149.genometemplate\sequences\NC_005110_chr11.gbk#0	90463843	NC_005110.4	+	20970	61966780..61987749	363784, 1563191		Tigit
LOC103693581	0.437	1.76	6.019	0.638	4.03038	2.75755	9.43248	0.684191	Z-021549	LOC103693581	gene		D:\assemblies\Rattus_norvegicus-Rnor_6.0-dbSNP149\Rattus_norvegicus-Rnor_6.0-dbSNP149.genometemplate\sequences\NC_005110_chr11.gbk#0	90463843	NC_005110.4	-	3769	64790752..64786984	103693581, 9463950		LOC103693581
Cd80	0.001	0.001	1.323	0.001	1	1	1400.09	1	Z-021551	Cd80	gene		D:\assemblies\Rattus_norvegicus-Rnor_6.0-dbSNP149\Rattus_norvegicus-Rnor_6.0-dbSNP149.genometemplate\sequences\NC_005110_chr11.gbk#0	90463843	NC_005110.4	-	40093	64855293..64815201	25408, 2314		Cd80	B7-1
LOC102552623	0.001	0.006	0.051	0.001	6.70749	6.70749	54.444	1	Z-021566	LOC102552623	gene		D:\assemblies\Rattus_norvegicus-Rnor_6.0-dbSNP149\Rattus_norvegicus-Rnor_6.0-dbSNP149.genometemplate\sequences\NC_005110_chr11.gbk#0	90463843	NC_005110.4	-	5387	65960133..65954747	102552623, 7535195		LOC102552623
LOC689230	22.013	79.17	0.001	26.211	3.59652	3.02046	3.60582e-05	0.839827	Z-021586	LOC689230	gene		D:\assemblies\Rattus_norvegicus-Rnor_6.0-dbSNP149\Rattus_norvegicus-Rnor_6.0-dbSNP149.genometemplate\sequences\NC_005110_chr11.gbk#0	90463843	NC_005110.4	+	7299	67329612..67336910	689230, 1594822		LOC689230
Stfa2l1	3.659	0.73	0.001	2.671	0.199564	0.273368	0.000353831	1.36983	Z-021587	Stfa2l1	gene		D:\assemblies\Rattus_norvegicus-Rnor_6.0-dbSNP149\Rattus_norvegicus-Rnor_6.0-dbSNP149.genometemplate\sequences\NC_005110_chr11.gbk#0	90463843	NC_005110.4	-	4313	67400201..67395889	408214, 1303106		Stfa2l1	Stfa2
Stfa2l2	88.028	275.29	0.001	105.426	3.12729	2.61122	8.96488e-06	0.834979	Z-021589	Stfa2l2	gene		D:\assemblies\Rattus_norvegicus-Rnor_6.0-dbSNP149\Rattus_norvegicus-Rnor_6.0-dbSNP149.genometemplate\sequences\NC_005110_chr11.gbk#0	90463843	NC_005110.4	+	2425	67451583..67454007	498087, 1560676		Stfa2l2
Stfa2	129.696	464.39	0.001	165.379	3.58059	2.80803	5.71492e-06	0.784236	Z-021590	Stfa2	gene		D:\assemblies\Rattus_norvegicus-Rnor_6.0-dbSNP149\Rattus_norvegicus-Rnor_6.0-dbSNP149.genometemplate\sequences\NC_005110_chr11.gbk#0	90463843	NC_005110.4	+	4886	67466126..67471011	303909, 1562186		Stfa2
LOC102552520	0.001	0.001	0.044	0.001	1	1	46.062	1	Z-021628	LOC102552520	gene		D:\assemblies\Rattus_norvegicus-Rnor_6.0-dbSNP149\Rattus_norvegicus-Rnor_6.0-dbSNP149.genometemplate\sequences\NC_005110_chr11.gbk#0	90463843	NC_005110.4	+	11510	70618458..70629967	102552520, 7661469		LOC102552520
LOC100910650	26.98	81.571	0.001	27.898	3.02344	2.92395	3.38784e-05	0.967094	Z-021639	LOC100910650	gene		D:\assemblies\Rattus_norvegicus-Rnor_6.0-dbSNP149\Rattus_norvegicus-Rnor_6.0-dbSNP149.genometemplate\sequences\NC_005110_chr11.gbk#0	90463843	NC_005110.4	+	5736	71211451..71217186	100910650, 6497346		LOC100910650
Muc20	6.559	16.876	0.001	5.544	2.5731	3.04421	0.000170489	1.18309	Z-021640	Muc20	gene		D:\assemblies\Rattus_norvegicus-Rnor_6.0-dbSNP149\Rattus_norvegicus-Rnor_6.0-dbSNP149.genometemplate\sequences\NC_005110_chr11.gbk#0	90463843	NC_005110.4	+	13622	71222602..71236223	303886, 1304865		Muc20
LOC102547162	0.001	0.001	0.088	0.001	1	1	93.481	1	Z-021644	LOC102547162	gene		D:\assemblies\Rattus_norvegicus-Rnor_6.0-dbSNP149\Rattus_norvegicus-Rnor_6.0-dbSNP149.genometemplate\sequences\NC_005110_chr11.gbk#0	90463843	NC_005110.4	+	7361	71482218..71489578	102547162, 7677093		LOC102547162
Apod	0.012	2.234	0.001	0.355	181.147	6.29658	0.00266409	0.0347595	Z-021670	Apod	gene		D:\assemblies\Rattus_norvegicus-Rnor_6.0-dbSNP149\Rattus_norvegicus-Rnor_6.0-dbSNP149.genometemplate\sequences\NC_005110_chr11.gbk#0	90463843	NC_005110.4	+	21060	72705204..72726263	25239, 2137		Apod	AOPDGN
LOC102554403	0.001	0.001	1.087	0.001	1	1	1150.04	1	Z-021698	LOC102554403	gene		D:\assemblies\Rattus_norvegicus-Rnor_6.0-dbSNP149\Rattus_norvegicus-Rnor_6.0-dbSNP149.genometemplate\sequences\NC_005110_chr11.gbk#0	90463843	NC_005110.4	-	10960	74228237..74217278	102554403, 7542669		LOC102554403
LOC103690589	0.018	0.045	0.181	0.001	2.46354	48.023	191.992	19.4935	Z-021716	LOC103690589	gene		D:\assemblies\Rattus_norvegicus-Rnor_6.0-dbSNP149\Rattus_norvegicus-Rnor_6.0-dbSNP149.genometemplate\sequences\NC_005110_chr11.gbk#0	90463843	NC_005110.4	+	3434	76766728..76770161	103690589, 9116762		LOC103690589
Ostn	1.305	0.181	14.151	0.001	0.138391	191.038	14972.2	1380.41	Z-021719	Ostn	gene		D:\assemblies\Rattus_norvegicus-Rnor_6.0-dbSNP149\Rattus_norvegicus-Rnor_6.0-dbSNP149.genometemplate\sequences\NC_005110_chr11.gbk#0	90463843	NC_005110.4	-	36218	76888140..76851923	360730, 1303110		Ostn
LOC102553681	0.004	0.012	0.185	0.001	3.0999	12.9611	195.223	4.18113	Z-021741	LOC102553681	gene		D:\assemblies\Rattus_norvegicus-Rnor_6.0-dbSNP149\Rattus_norvegicus-Rnor_6.0-dbSNP149.genometemplate\sequences\NC_005110_chr11.gbk#0	90463843	NC_005110.4	+	31584	80017910..80049493	102553681, 7520888		LOC102553681
LOC103690608	0.001	0.006	0.129	0.001	6.17726	6.17726	136.683	1	Z-021742	LOC103690608	gene		D:\assemblies\Rattus_norvegicus-Rnor_6.0-dbSNP149\Rattus_norvegicus-Rnor_6.0-dbSNP149.genometemplate\sequences\NC_005110_chr11.gbk#0	90463843	NC_005110.4	+	31751	80049834..80081584	103690608, 9251123		LOC103690608
LOC102553356	0.004	0.297	0.151	0.001	83.3201	314.022	159.42	3.76886	Z-021743	LOC102553356	gene		D:\assemblies\Rattus_norvegicus-Rnor_6.0-dbSNP149\Rattus_norvegicus-Rnor_6.0-dbSNP149.genometemplate\sequences\NC_005110_chr11.gbk#0	90463843	NC_005110.4	-	10069	80122838..80112770	102553356, 7656435		LOC102553356
Kng1	7.57	17.419	0.575	7.918	2.30103	2.19986	0.0726495	0.956036	Z-021759	Kng1	gene		D:\assemblies\Rattus_norvegicus-Rnor_6.0-dbSNP149\Rattus_norvegicus-Rnor_6.0-dbSNP149.genometemplate\sequences\NC_005110_chr11.gbk#0	90463843	NC_005110.4	+	7575	81509185..81516759	24903, 2980		Kng1	KINKG, KINKH, KINT1G, Kng, Kng1_v1, Kngk, Kngt, Kngt1, Kng_v1, Map1, Tkg, TKG6
Fetub	0.008	0.001	0.001	0.277	0.122035	0.00341268	0.00341268	0.0279647	Z-021763	Fetub	gene		D:\assemblies\Rattus_norvegicus-Rnor_6.0-dbSNP149\Rattus_norvegicus-Rnor_6.0-dbSNP149.genometemplate\sequences\NC_005110_chr11.gbk#0	90463843	NC_005110.4	-	11583	81660472..81648890	83928, 69293		Fetub	Fet, IRL685, Pp63
B3gnt5	0.079	0.006	1.859	0.001	0.0782201	6.54568	1967.22	83.6829	Z-021826	B3gnt5	gene		D:\assemblies\Rattus_norvegicus-Rnor_6.0-dbSNP149\Rattus_norvegicus-Rnor_6.0-dbSNP149.genometemplate\sequences\NC_005110_chr11.gbk#0	90463843	NC_005110.4	-	12106	84931160..84919055	116740, 70955		B3gnt5
Lamp3	0.001	0.001	1.671	0.001	1	1	1767.96	1	Z-021827	Lamp3	gene		D:\assemblies\Rattus_norvegicus-Rnor_6.0-dbSNP149\Rattus_norvegicus-Rnor_6.0-dbSNP149.genometemplate\sequences\NC_005110_chr11.gbk#0	90463843	NC_005110.4	+	69730	84930965..85000694	303801, 1307928		Lamp3
LOC500162	0.034	0.001	0.389	0.001	0.0274955	1	411.616	36.3696	Z-021831	LOC500162	gene		D:\assemblies\Rattus_norvegicus-Rnor_6.0-dbSNP149\Rattus_norvegicus-Rnor_6.0-dbSNP149.genometemplate\sequences\NC_005110_chr11.gbk#0	90463843	NC_005110.4	+	518	85053681..85054198	500162		LOC500162
Olr1570	0.001	0.001	0.14	0.001	1	1	148.536	1	Z-021839	Olr1570	gene		D:\assemblies\Rattus_norvegicus-Rnor_6.0-dbSNP149\Rattus_norvegicus-Rnor_6.0-dbSNP149.genometemplate\sequences\NC_005110_chr11.gbk#0	90463843	NC_005110.4	+	942	85398979..85399920	287968, 1333258		Olr1570	ratchr11-83815769-83816710_ORF
LOC680329	30.947	48.183	600.068	28.052	1.55694	1.71764	21.3914	1.10322	Z-021840	LOC680329	gene		D:\assemblies\Rattus_norvegicus-Rnor_6.0-dbSNP149\Rattus_norvegicus-Rnor_6.0-dbSNP149.genometemplate\sequences\NC_005110_chr11.gbk#0	90463843	NC_005110.4	+	662590	85430330..86092919	680329, 6484481		LOC680329
LOC100911837	0.001	0.134	1.151	0.001	141.676	141.676	1217.87	1	Z-021842	LOC100911837	gene		D:\assemblies\Rattus_norvegicus-Rnor_6.0-dbSNP149\Rattus_norvegicus-Rnor_6.0-dbSNP149.genometemplate\sequences\NC_005110_chr11.gbk#0	90463843	NC_005110.4	-	94145	85896680..85802536	100911837, 6490647		LOC100911837
LOC100361706	6.891	9.748	133.44	6.029	1.41454	1.617	22.1349	1.14312	Z-021843	LOC100361706	gene		D:\assemblies\Rattus_norvegicus-Rnor_6.0-dbSNP149\Rattus_norvegicus-Rnor_6.0-dbSNP149.genometemplate\sequences\NC_005110_chr11.gbk#0	90463843	NC_005110.4	+	1578	86094822..86096399	100361706, 2319568		LOC100361706
Gp1bb	22.902	95.371	0.001	25.616	4.16438	3.72319	3.68968e-05	0.894055	Z-021851	Gp1bb	gene		D:\assemblies\Rattus_norvegicus-Rnor_6.0-dbSNP149\Rattus_norvegicus-Rnor_6.0-dbSNP149.genometemplate\sequences\NC_005110_chr11.gbk#0	90463843	NC_005110.4	+	1178	86520992..86522169	116727, 621050		Gp1bb
Igll1	1.255	0.224	0.001	1.876	0.178882	0.119656	0.000503927	0.668906	Z-021924	Igll1	gene		D:\assemblies\Rattus_norvegicus-Rnor_6.0-dbSNP149\Rattus_norvegicus-Rnor_6.0-dbSNP149.genometemplate\sequences\NC_005110_chr11.gbk#0	90463843	NC_005110.4	+	3147	88388378..88391524	100360919, 2321140		Igll1
LOC102550200	0.001	0.001	0.235	0.001	1	1	248.169	1	Z-021939	LOC102550200	gene		D:\assemblies\Rattus_norvegicus-Rnor_6.0-dbSNP149\Rattus_norvegicus-Rnor_6.0-dbSNP149.genometemplate\sequences\NC_005110_chr11.gbk#0	90463843	NC_005110.4	+	999	89298078..89299076	102550200, 7744925		LOC102550200
LOC102548900	0.286	0.174	0.001	0.526	0.608248	0.330666	0.00179573	0.543637	Z-021956	LOC102548900	gene		D:\assemblies\Rattus_norvegicus-Rnor_6.0-dbSNP149\Rattus_norvegicus-Rnor_6.0-dbSNP149.genometemplate\sequences\NC_005111_chr12.gbk#0	52716770	NC_005111.4	+	14409	853740..868148	102548900, 7689250		LOC102548900
Mcemp1	20.51	51.871	0.001	27.854	2.52902	1.86226	3.39316e-05	0.736357	Z-021981	Mcemp1	gene		D:\assemblies\Rattus_norvegicus-Rnor_6.0-dbSNP149\Rattus_norvegicus-Rnor_6.0-dbSNP149.genometemplate\sequences\NC_005111_chr12.gbk#0	52716770	NC_005111.4	+	5036	2211970..2217005	498128, 1565374		Mcemp1	RGD1565374
Fcer2	0.337	0.042	10.234	0.001	0.125155	44.5756	10827.9	356.164	Z-021983	Fcer2	gene		D:\assemblies\Rattus_norvegicus-Rnor_6.0-dbSNP149\Rattus_norvegicus-Rnor_6.0-dbSNP149.genometemplate\sequences\NC_005111_chr12.gbk#0	52716770	NC_005111.4	-	11553	2245324..2233772	171075, 619997		Fcer2	CD23, Fcer2a
Cd209d	0.001	0.001	1.036	0.001	1	1	1096.14	1	Z-021988	Cd209d	gene		D:\assemblies\Rattus_norvegicus-Rnor_6.0-dbSNP149\Rattus_norvegicus-Rnor_6.0-dbSNP149.genometemplate\sequences\NC_005111_chr12.gbk#0	52716770	NC_005111.4	-	6446	2413324..2406879	363856, 1561104		Cd209d	Clec4m, Dc-signr, RGD1561104
Cd209c	0.001	0.008	1.141	0.001	8.70583	8.70583	1207.67	1	Z-022006	Cd209c	gene		D:\assemblies\Rattus_norvegicus-Rnor_6.0-dbSNP149\Rattus_norvegicus-Rnor_6.0-dbSNP149.genometemplate\sequences\NC_005111_chr12.gbk#0	52716770	NC_005111.4	-	8719	2846709..2837991	688951, 1582956		Cd209c
LOC102554161	0.112	0.007	0.536	0.001	0.066981	7.90218	567.075	117.976	Z-022011	LOC102554161	gene		D:\assemblies\Rattus_norvegicus-Rnor_6.0-dbSNP149\Rattus_norvegicus-Rnor_6.0-dbSNP149.genometemplate\sequences\NC_005111_chr12.gbk#0	52716770	NC_005111.4	+	7616	3272226..3279841	102554161, 7570154		LOC102554161
Zfp958	0.909	1.323	22.924	1.596	1.45514	0.828716	14.36	0.569508	Z-022026	Zfp958	gene		D:\assemblies\Rattus_norvegicus-Rnor_6.0-dbSNP149\Rattus_norvegicus-Rnor_6.0-dbSNP149.genometemplate\sequences\NC_005111_chr12.gbk#0	52716770	NC_005111.4	-	6564	5492254..5485691	100302405, 2311392		Zfp958	Zinki
LOC102553253	0.001	0.001	0.041	0.001	1	1	43.1589	1	Z-022059	LOC102553253	gene		D:\assemblies\Rattus_norvegicus-Rnor_6.0-dbSNP149\Rattus_norvegicus-Rnor_6.0-dbSNP149.genometemplate\sequences\NC_005111_chr12.gbk#0	52716770	NC_005111.4	-	5746	7284014..7278269	102553253, 7625496		LOC102553253
LOC102555153	0.001	0.001	0.041	0.001	1	1	43.1589	1	Z-022067	LOC102555153	gene		D:\assemblies\Rattus_norvegicus-Rnor_6.0-dbSNP149\Rattus_norvegicus-Rnor_6.0-dbSNP149.genometemplate\sequences\NC_005111_chr12.gbk#0	52716770	NC_005111.4	-	5746	7560808..7555063	102555153, 7624565		LOC102555153
Wasf3	0.59	0.062	0.001	0.117	0.104708	0.526155	0.0080462	5.02496	Z-022103	Wasf3	gene		D:\assemblies\Rattus_norvegicus-Rnor_6.0-dbSNP149\Rattus_norvegicus-Rnor_6.0-dbSNP149.genometemplate\sequences\NC_005111_chr12.gbk#0	52716770	NC_005111.4	-	93119	10391014..10297896	682937, 1592807		Wasf3
Rsph10b	0.005	0.004	0.153	0.001	0.873401	4.58509	162.11	5.2497	Z-022147	Rsph10b	gene		D:\assemblies\Rattus_norvegicus-Rnor_6.0-dbSNP149\Rattus_norvegicus-Rnor_6.0-dbSNP149.genometemplate\sequences\NC_005111_chr12.gbk#0	52716770	NC_005111.4	-	48641	12713834..12665194	288478, 1311893		Rsph10b	RGD1311893
Ankrd61	0.001	0.04	0.152	0.001	42.7362	42.7362	160.542	1	Z-022151	Ankrd61	gene		D:\assemblies\Rattus_norvegicus-Rnor_6.0-dbSNP149\Rattus_norvegicus-Rnor_6.0-dbSNP149.genometemplate\sequences\NC_005111_chr12.gbk#0	52716770	NC_005111.4	+	4359	12756480..12760838	689907, 1586393		Ankrd61
Sdk1	0.005	0.004	0.083	0.001	0.850282	4.27454	87.6422	5.02721	Z-022188	Sdk1	gene		D:\assemblies\Rattus_norvegicus-Rnor_6.0-dbSNP149\Rattus_norvegicus-Rnor_6.0-dbSNP149.genometemplate\sequences\NC_005111_chr12.gbk#0	52716770	NC_005111.4	-	997645	15443442..14445798	304297, 1560686		Sdk1
LOC102546864	0.337	0.059	1.163	0.001	0.173924	62.0854	1230.36	356.968	Z-022220	LOC102546864	gene		D:\assemblies\Rattus_norvegicus-Rnor_6.0-dbSNP149\Rattus_norvegicus-Rnor_6.0-dbSNP149.genometemplate\sequences\NC_005111_chr12.gbk#0	52716770	NC_005111.4	-	12191	17333460..17321270	102546864, 7673409		LOC102546864
Il3ra	1.266	3.906	24.869	2.35	3.08573	1.66191	10.5812	0.538579	Z-022250	Il3ra	gene		D:\assemblies\Rattus_norvegicus-Rnor_6.0-dbSNP149\Rattus_norvegicus-Rnor_6.0-dbSNP149.genometemplate\sequences\NC_005111_chr12.gbk#0	52716770	NC_005111.4	-	7747	18542508..18534762	246144, 628728		Il3ra	Cyrl
Nxpe5	0.009	0.712	0.43	0.001	77.1247	752.911	455.136	9.76225	Z-022272	Nxpe5	gene		D:\assemblies\Rattus_norvegicus-Rnor_6.0-dbSNP149\Rattus_norvegicus-Rnor_6.0-dbSNP149.genometemplate\sequences\NC_005111_chr12.gbk#0	52716770	NC_005111.4	-	11842	19440791..19428950	680711, 1588255		Nxpe5
LOC102551683	0.011	0.149	0.441	0.001	14.0551	157.483	466.804	11.2047	Z-022325	LOC102551683	gene		D:\assemblies\Rattus_norvegicus-Rnor_6.0-dbSNP149\Rattus_norvegicus-Rnor_6.0-dbSNP149.genometemplate\sequences\NC_005111_chr12.gbk#0	52716770	NC_005111.4	+	1474	21777629..21779102	102551683, 7591909		LOC102551683
RGD1566006	1.629	2.698	0.001	3.474	1.65673	0.776674	0.000272058	0.4688	Z-022329	RGD1566006	gene		D:\assemblies\Rattus_norvegicus-Rnor_6.0-dbSNP149\Rattus_norvegicus-Rnor_6.0-dbSNP149.genometemplate\sequences\NC_005111_chr12.gbk#0	52716770	NC_005111.4	-	10115	21891122..21881008	501828, 1566006		RGD1566006
Lrwd1	3.387	9.987	45.837	4.494	2.94875	2.22233	10.2001	0.753651	Z-022383	Lrwd1	gene		D:\assemblies\Rattus_norvegicus-Rnor_6.0-dbSNP149\Rattus_norvegicus-Rnor_6.0-dbSNP149.genometemplate\sequences\NC_005111_chr12.gbk#0	52716770	NC_005111.4	+	13029	23574234..23587262	304396, 1359442		Lrwd1
Abhd11os	0.006	0.008	5.353	0.001	1.38644	8.14744	5663.82	5.87652	Z-022419	Abhd11os	gene		D:\assemblies\Rattus_norvegicus-Rnor_6.0-dbSNP149\Rattus_norvegicus-Rnor_6.0-dbSNP149.genometemplate\sequences\NC_005111_chr12.gbk#0	52716770	NC_005111.4	+	988	24721190..24722177	686120, 1585479		Abhd11os	Wbscr26
Fzd10	0.001	0.001	0.086	0.001	1	1	91.4732	1	Z-022488	Fzd10	gene		D:\assemblies\Rattus_norvegicus-Rnor_6.0-dbSNP149\Rattus_norvegicus-Rnor_6.0-dbSNP149.genometemplate\sequences\NC_005111_chr12.gbk#0	52716770	NC_005111.4	-	3198	31760604..31757407	363913, 1583825		Fzd10	Fzd10-ps1
LOC108352448	0.006	0.03	0.101	0.001	5.20481	32.1703	107.266	6.18087	Z-022589	LOC108352448	gene		D:\assemblies\Rattus_norvegicus-Rnor_6.0-dbSNP149\Rattus_norvegicus-Rnor_6.0-dbSNP149.genometemplate\sequences\NC_005111_chr12.gbk#0	52716770	NC_005111.4	+	7550	39741427..39748976	108352448		LOC108352448
Ccdc63	0.001	0.001	0.31	0.001	1	1	327.661	1	Z-022594	Ccdc63	gene		D:\assemblies\Rattus_norvegicus-Rnor_6.0-dbSNP149\Rattus_norvegicus-Rnor_6.0-dbSNP149.genometemplate\sequences\NC_005111_chr12.gbk#0	52716770	NC_005111.4	+	45600	39905120..39950719	304484, 1562334		Ccdc63
Myl2	0.007	0.01	0.87	0.001	1.26867	10.0524	920.116	7.92356	Z-022596	Myl2	gene		D:\assemblies\Rattus_norvegicus-Rnor_6.0-dbSNP149\Rattus_norvegicus-Rnor_6.0-dbSNP149.genometemplate\sequences\NC_005111_chr12.gbk#0	52716770	NC_005111.4	-	7203	39959065..39951863	363925, 1564245		Myl2	Mlc-2, MLC-2s/v, Mlc2
Dtx1	0.006	0.006	1.023	0.001	1.10042	6.49164	1082.34	5.89926	Z-022627	Dtx1	gene		D:\assemblies\Rattus_norvegicus-Rnor_6.0-dbSNP149\Rattus_norvegicus-Rnor_6.0-dbSNP149.genometemplate\sequences\NC_005111_chr12.gbk#0	52716770	NC_005111.4	+	31899	41383885..41415783	687424, 1585380		Dtx1
LOC100909836	0.001	0.001	0.228	0.001	1	1	241.255	1	Z-022704	LOC100909836	gene		D:\assemblies\Rattus_norvegicus-Rnor_6.0-dbSNP149\Rattus_norvegicus-Rnor_6.0-dbSNP149.genometemplate\sequences\NC_005111_chr12.gbk#0	52716770	NC_005111.4	+	5886	46989910..46995795	100909836, 6501760		LOC100909836
Hnf1a	0.001	0.001	0.945	0.001	1	1	999.366	1	Z-022721	Hnf1a	gene		D:\assemblies\Rattus_norvegicus-Rnor_6.0-dbSNP149\Rattus_norvegicus-Rnor_6.0-dbSNP149.genometemplate\sequences\NC_005111_chr12.gbk#0	52716770	NC_005111.4	+	25532	47407811..47433342	24817, 3828		Hnf1a	HNF1, LF-B1, Lfb1, Tcf1
LOC103691428	0.001	0.09	3.741	0.001	95.3749	95.3749	3957.96	1	Z-022732	LOC103691428	gene		D:\assemblies\Rattus_norvegicus-Rnor_6.0-dbSNP149\Rattus_norvegicus-Rnor_6.0-dbSNP149.genometemplate\sequences\NC_005111_chr12.gbk#0	52716770	NC_005111.4	+	2197	47660340..47662536	103691428, 9078030		LOC103691428
LOC103691433	0.005	0.008	0.001	0.145	1.5832	0.0528857	0.00650689	0.0334043	Z-022737	LOC103691433	gene		D:\assemblies\Rattus_norvegicus-Rnor_6.0-dbSNP149\Rattus_norvegicus-Rnor_6.0-dbSNP149.genometemplate\sequences\NC_005111_chr12.gbk#0	52716770	NC_005111.4	+	6822	47841814..47848635	103691433, 9133757		LOC103691433
LOC108352474	0.001	0.011	0.143	0.001	11.184	11.184	151.43	1	Z-022800	LOC108352474	gene		D:\assemblies\Rattus_norvegicus-Rnor_6.0-dbSNP149\Rattus_norvegicus-Rnor_6.0-dbSNP149.genometemplate\sequences\NC_005111_chr12.gbk#0	52716770	NC_005111.4	+	11692	51555195..51566886	108352474		LOC108352474
LOC102556459	0.001	0.007	0.31	0.001	7.2172	7.2172	327.929	1	Z-022828	LOC102556459	gene		D:\assemblies\Rattus_norvegicus-Rnor_6.0-dbSNP149\Rattus_norvegicus-Rnor_6.0-dbSNP149.genometemplate\sequences\NC_005111_chr12.gbk#0	52716770	NC_005111.4	+	5377	52706041..52711417	102556459, 7554229		LOC102556459
LOC103693659	0.001	0.001	0.512	0.001	1	1	541.204	1	Z-022836	LOC103693659	gene		D:\assemblies\Rattus_norvegicus-Rnor_6.0-dbSNP149\Rattus_norvegicus-Rnor_6.0-dbSNP149.genometemplate\sequences\NC_005112_chr13.gbk#0	114033958	NC_005112.4	-	1825	5369234..5367410	103693659, 9199041		LOC103693659
LOC108352518	0.001	0.001	1.27	0.001	1	1	1344.12	1	Z-022879	LOC108352518	gene		D:\assemblies\Rattus_norvegicus-Rnor_6.0-dbSNP149\Rattus_norvegicus-Rnor_6.0-dbSNP149.genometemplate\sequences\NC_005112_chr13.gbk#0	114033958	NC_005112.4	-	1004	26454083..26453080	108352518		LOC108352518
LOC108352519	0.007	0.001	1.258	0.001	0.127271	1	1331.25	7.85722	Z-022881	LOC108352519	gene		D:\assemblies\Rattus_norvegicus-Rnor_6.0-dbSNP149\Rattus_norvegicus-Rnor_6.0-dbSNP149.genometemplate\sequences\NC_005112_chr13.gbk#0	114033958	NC_005112.4	-	10922	26519789..26508868	108352519		LOC108352519
Serpinb2	0.712	1.919	0.001	0.439	2.69739	4.37435	0.00215405	1.6217	Z-022894	Serpinb2	gene		D:\assemblies\Rattus_norvegicus-Rnor_6.0-dbSNP149\Rattus_norvegicus-Rnor_6.0-dbSNP149.genometemplate\sequences\NC_005112_chr13.gbk#0	114033958	NC_005112.4	+	13109	27449907..27463015	60325, 621823		Serpinb2	Pai2a
Serpinb10	9.513	26.073	0.426	12.478	2.74085	2.08946	0.0341343	0.76234	Z-022895	Serpinb10	gene		D:\assemblies\Rattus_norvegicus-Rnor_6.0-dbSNP149\Rattus_norvegicus-Rnor_6.0-dbSNP149.genometemplate\sequences\NC_005112_chr13.gbk#0	114033958	NC_005112.4	+	17754	27466036..27483789	266775, 628853		Serpinb10	Trespin
LOC108352521	0.001	0.001	0.565	0.001	1	1	597.998	1	Z-022919	LOC108352521	gene		D:\assemblies\Rattus_norvegicus-Rnor_6.0-dbSNP149\Rattus_norvegicus-Rnor_6.0-dbSNP149.genometemplate\sequences\NC_005112_chr13.gbk#0	114033958	NC_005112.4	+	1827	35676580..35678406	108352521		LOC108352521
Sctr	0.021	0.001	0.431	0.001	0.0445873	1	456.371	22.4279	Z-022923	Sctr	gene		D:\assemblies\Rattus_norvegicus-Rnor_6.0-dbSNP149\Rattus_norvegicus-Rnor_6.0-dbSNP149.genometemplate\sequences\NC_005112_chr13.gbk#0	114033958	NC_005112.4	+	51275	36039241..36090515	81779, 621342		Sctr
LOC102552107	0.019	0.007	0.162	0.001	0.379653	7.47046	171.723	19.6771	Z-022933	LOC102552107	gene		D:\assemblies\Rattus_norvegicus-Rnor_6.0-dbSNP149\Rattus_norvegicus-Rnor_6.0-dbSNP149.genometemplate\sequences\NC_005112_chr13.gbk#0	114033958	NC_005112.4	-	10833	37304008..37293176	102552107, 7536945		LOC102552107
Dyrk3	3.859	3.29	0.116	4.837	0.852702	0.680254	0.0240765	0.797762	Z-022994	Dyrk3	gene		D:\assemblies\Rattus_norvegicus-Rnor_6.0-dbSNP149\Rattus_norvegicus-Rnor_6.0-dbSNP149.genometemplate\sequences\NC_005112_chr13.gbk#0	114033958	NC_005112.4	-	10648	47916877..47906230	304775, 1310924		Dyrk3
LOC103691877	0.006	0.001	0.143	0.001	0.163139	1	151.594	6.12975	Z-023000	LOC103691877	gene		D:\assemblies\Rattus_norvegicus-Rnor_6.0-dbSNP149\Rattus_norvegicus-Rnor_6.0-dbSNP149.genometemplate\sequences\NC_005112_chr13.gbk#0	114033958	NC_005112.4	+	1943	48107053..48108995	103691877, 9164779		LOC103691877
Mfsd4	0.007	0.004	0.275	0.001	0.634334	4.38218	290.706	6.90833	Z-023016	Mfsd4	gene		D:\assemblies\Rattus_norvegicus-Rnor_6.0-dbSNP149\Rattus_norvegicus-Rnor_6.0-dbSNP149.genometemplate\sequences\NC_005112_chr13.gbk#0	114033958	NC_005112.4	-	41278	48848997..48807720	498228, 1566090		Mfsd4	RGD1566090
Tmcc2	25.069	43.332	1.17	31.739	1.72851	1.36525	0.0368731	0.789845	Z-023024	Tmcc2	gene		D:\assemblies\Rattus_norvegicus-Rnor_6.0-dbSNP149\Rattus_norvegicus-Rnor_6.0-dbSNP149.genometemplate\sequences\NC_005112_chr13.gbk#0	114033958	NC_005112.4	-	37087	49169771..49132685	305095, 1311960		Tmcc2	RGD1311960
Mgat4e	0.005	0.007	0.213	0.001	1.41342	7.40895	225.823	5.24184	Z-023074	Mgat4e	gene		D:\assemblies\Rattus_norvegicus-Rnor_6.0-dbSNP149\Rattus_norvegicus-Rnor_6.0-dbSNP149.genometemplate\sequences\NC_005112_chr13.gbk#0	114033958	NC_005112.4	-	17900	51382702..51364803	289038, 1308112		Mgat4e
Ptprv	0.07	0.045	2.834	0.255	0.641133	0.175295	11.1342	0.273415	Z-023082	Ptprv	gene		D:\assemblies\Rattus_norvegicus-Rnor_6.0-dbSNP149\Rattus_norvegicus-Rnor_6.0-dbSNP149.genometemplate\sequences\NC_005112_chr13.gbk#0	114033958	NC_005112.4	-	21024	51956262..51935239	64576, 621123		Ptprv	Esp
LOC102551374	0.001	0.001	5.052	0.001	1	1	5345.78	1	Z-023160	LOC102551374	gene		D:\assemblies\Rattus_norvegicus-Rnor_6.0-dbSNP149\Rattus_norvegicus-Rnor_6.0-dbSNP149.genometemplate\sequences\NC_005112_chr13.gbk#0	114033958	NC_005112.4	-	10772	60828994..60818223	102551374, 7561471		LOC102551374
Rgs13	0.001	0.103	1.149	0.001	108.705	108.705	1216.23	1	Z-023164	Rgs13	gene		D:\assemblies\Rattus_norvegicus-Rnor_6.0-dbSNP149\Rattus_norvegicus-Rnor_6.0-dbSNP149.genometemplate\sequences\NC_005112_chr13.gbk#0	114033958	NC_005112.4	-	34089	61004260..60970172	498246, 1562103		Rgs13
Rgs1	1.022	0.151	53.013	1.098	0.147321	0.137068	48.2751	0.930405	Z-023165	Rgs1	gene		D:\assemblies\Rattus_norvegicus-Rnor_6.0-dbSNP149\Rattus_norvegicus-Rnor_6.0-dbSNP149.genometemplate\sequences\NC_005112_chr13.gbk#0	114033958	NC_005112.4	-	4577	61070772..61066196	54289, 3561		Rgs1
LOC103690097	17.254	37.441	0.163	25.561	2.17007	1.46481	0.00639627	0.675007	Z-023168	LOC103690097	gene		D:\assemblies\Rattus_norvegicus-Rnor_6.0-dbSNP149\Rattus_norvegicus-Rnor_6.0-dbSNP149.genometemplate\sequences\NC_005112_chr13.gbk#0	114033958	NC_005112.4	-	1956	61423668..61421713	103690097, 9407614		LOC103690097
Rgs18	80.835	200.466	1.258	101.941	2.47994	1.96648	0.0123431	0.792954	Z-023169	Rgs18	gene		D:\assemblies\Rattus_norvegicus-Rnor_6.0-dbSNP149\Rattus_norvegicus-Rnor_6.0-dbSNP149.genometemplate\sequences\NC_005112_chr13.gbk#0	114033958	NC_005112.4	-	26759	61591139..61564381	289076, 1306522		Rgs18
Prg4	0.268	0.428	2.294	0.214	1.599	1.99931	10.7036	1.25035	Z-023186	Prg4	gene		D:\assemblies\Rattus_norvegicus-Rnor_6.0-dbSNP149\Rattus_norvegicus-Rnor_6.0-dbSNP149.genometemplate\sequences\NC_005112_chr13.gbk#0	114033958	NC_005112.4	-	16315	67688902..67672588	289104, 1308976		Prg4
Pappa2	0.021	0.106	0.001	0.075	4.9835	1.40897	0.0125423	0.282727	Z-023276	Pappa2	gene		D:\assemblies\Rattus_norvegicus-Rnor_6.0-dbSNP149\Rattus_norvegicus-Rnor_6.0-dbSNP149.genometemplate\sequences\NC_005112_chr13.gbk#0	114033958	NC_005112.4	-	271099	76660248..76389150	680415, 1591785		Pappa2
Slc9c2	0.001	0.023	0.197	0.001	24.3989	24.3989	208.417	1	Z-023297	Slc9c2	gene		D:\assemblies\Rattus_norvegicus-Rnor_6.0-dbSNP149\Rattus_norvegicus-Rnor_6.0-dbSNP149.genometemplate\sequences\NC_005112_chr13.gbk#0	114033958	NC_005112.4	+	72693	79000368..79073060	364029, 1565820		Slc9c2
Fmo1	18.865	38.97	0.688	27.11	2.06572	1.43747	0.0253827	0.695871	Z-023323	Fmo1	gene		D:\assemblies\Rattus_norvegicus-Rnor_6.0-dbSNP149\Rattus_norvegicus-Rnor_6.0-dbSNP149.genometemplate\sequences\NC_005112_chr13.gbk#0	114033958	NC_005112.4	-	32211	80745095..80712885	25256, 2622		Fmo1	RFMO1A
Sele	0.25	0.01	0.001	0.194	0.0392739	0.0505511	0.00487501	1.28714	Z-023340	Sele	gene		D:\assemblies\Rattus_norvegicus-Rnor_6.0-dbSNP149\Rattus_norvegicus-Rnor_6.0-dbSNP149.genometemplate\sequences\NC_005112_chr13.gbk#0	114033958	NC_005112.4	+	10090	82355234..82365323	25544, 3654		Sele
LOC102546371	0.004	0.003	0.036	0.001	0.935856	3.63201	38.3027	3.88094	Z-023350	LOC102546371	gene		D:\assemblies\Rattus_norvegicus-Rnor_6.0-dbSNP149\Rattus_norvegicus-Rnor_6.0-dbSNP149.genometemplate\sequences\NC_005112_chr13.gbk#0	114033958	NC_005112.4	-	11253	83100916..83089664	102546371, 7512173		LOC102546371
Xcl1	0.001	0.001	6.871	0.001	1	1	7270.06	1	Z-023352	Xcl1	gene		D:\assemblies\Rattus_norvegicus-Rnor_6.0-dbSNP149\Rattus_norvegicus-Rnor_6.0-dbSNP149.genometemplate\sequences\NC_005112_chr13.gbk#0	114033958	NC_005112.4	-	3444	83202845..83199402	171371, 620452		Xcl1	Ltn, Scyc1
Cd247	0.001	0.001	8.613	0.001	1	1	9113.26	1	Z-023364	Cd247	gene		D:\assemblies\Rattus_norvegicus-Rnor_6.0-dbSNP149\Rattus_norvegicus-Rnor_6.0-dbSNP149.genometemplate\sequences\NC_005112_chr13.gbk#0	114033958	NC_005112.4	+	75364	83996045..84071408	25300, 2305		Cd247	Cd3z, TCRzeta
LOC102553924	0.002	0.001	0.288	0.001	0.38025	1	304.725	2.62985	Z-023388	LOC102553924	gene		D:\assemblies\Rattus_norvegicus-Rnor_6.0-dbSNP149\Rattus_norvegicus-Rnor_6.0-dbSNP149.genometemplate\sequences\NC_005112_chr13.gbk#0	114033958	NC_005112.4	+	8466	85778893..85787358	102553924, 7718804		LOC102553924
Sh2d1b2	4.809	4.468	0.001	3.769	0.929196	1.18568	0.000250797	1.27602	Z-023413	Sh2d1b2	gene		D:\assemblies\Rattus_norvegicus-Rnor_6.0-dbSNP149\Rattus_norvegicus-Rnor_6.0-dbSNP149.genometemplate\sequences\NC_005112_chr13.gbk#0	114033958	NC_005112.4	+	26718	88557361..88584078	685844, 1589042		Sh2d1b2
LOC108352627	0.001	0.008	0.594	0.001	8.54629	8.54629	628.733	1	Z-023414	LOC108352627	gene		D:\assemblies\Rattus_norvegicus-Rnor_6.0-dbSNP149\Rattus_norvegicus-Rnor_6.0-dbSNP149.genometemplate\sequences\NC_005112_chr13.gbk#0	114033958	NC_005112.4	-	2042	88603179..88601138	108352627		LOC108352627
Fcrla	4.316	4.699	75.172	3.551	1.08876	1.32354	21.1711	1.21564	Z-023425	Fcrla	gene		D:\assemblies\Rattus_norvegicus-Rnor_6.0-dbSNP149\Rattus_norvegicus-Rnor_6.0-dbSNP149.genometemplate\sequences\NC_005112_chr13.gbk#0	114033958	NC_005112.4	-	9650	89306219..89296570	304965, 1306176		Fcrla	Fcrlm1, RGD1306176
Cfap126	0.001	0.008	0.675	0.001	8.80473	8.80473	714.027	1	Z-023439	Cfap126	gene		D:\assemblies\Rattus_norvegicus-Rnor_6.0-dbSNP149\Rattus_norvegicus-Rnor_6.0-dbSNP149.genometemplate\sequences\NC_005112_chr13.gbk#0	114033958	NC_005112.4	+	15892	89480058..89495949	498278, 1562658		Cfap126	RGD1562658
Tstd1	0.009	0.008	13.541	0.001	0.873401	8.63154	14327.4	9.88267	Z-023460	Tstd1	gene		D:\assemblies\Rattus_norvegicus-Rnor_6.0-dbSNP149\Rattus_norvegicus-Rnor_6.0-dbSNP149.genometemplate\sequences\NC_005112_chr13.gbk#0	114033958	NC_005112.4	+	1704	89805652..89807355	100359478, 2323815		Tstd1
LOC103692282	0.001	0.001	2.734	0.001	1	1	2892.51	1	Z-023465	LOC103692282	gene		D:\assemblies\Rattus_norvegicus-Rnor_6.0-dbSNP149\Rattus_norvegicus-Rnor_6.0-dbSNP149.genometemplate\sequences\NC_005112_chr13.gbk#0	114033958	NC_005112.4	+	6655	89997710..90004364	103692282, 9330179		LOC103692282
Slamf7	0.005	0.001	1.832	0.001	0.173618	1	1938.11	5.75977	Z-023468	Slamf7	gene		D:\assemblies\Rattus_norvegicus-Rnor_6.0-dbSNP149\Rattus_norvegicus-Rnor_6.0-dbSNP149.genometemplate\sequences\NC_005112_chr13.gbk#0	114033958	NC_005112.4	-	18434	90075159..90056726	364049, 1560190		Slamf7	RGD1560190
Slamf1	0.006	0.01	1.209	0.001	1.8252	10.7586	1279.4	5.89446	Z-023472	Slamf1	gene		D:\assemblies\Rattus_norvegicus-Rnor_6.0-dbSNP149\Rattus_norvegicus-Rnor_6.0-dbSNP149.genometemplate\sequences\NC_005112_chr13.gbk#0	114033958	NC_005112.4	+	34626	90184545..90219170	498286, 1560634		Slamf1	RGD1560634
LOC103692287	0.001	0.001	0.63	0.001	1	1	666.867	1	Z-023475	LOC103692287	gene		D:\assemblies\Rattus_norvegicus-Rnor_6.0-dbSNP149\Rattus_norvegicus-Rnor_6.0-dbSNP149.genometemplate\sequences\NC_005112_chr13.gbk#0	114033958	NC_005112.4	-	24959	90300066..90275108	103692287, 9220554		LOC103692287
LOC108352575	0.016	0.018	0.067	0.001	1.09161	18.7194	70.6648	17.1485	Z-023498	LOC108352575	gene		D:\assemblies\Rattus_norvegicus-Rnor_6.0-dbSNP149\Rattus_norvegicus-Rnor_6.0-dbSNP149.genometemplate\sequences\NC_005112_chr13.gbk#0	114033958	NC_005112.4	+	28750	90856997..90885746	108352575		LOC108352575
Fcgr2a	10.793	18.135	0.916	10.368	1.68029	1.74915	0.0883238	1.04098	Z-023506	Fcgr2a	gene		D:\assemblies\Rattus_norvegicus-Rnor_6.0-dbSNP149\Rattus_norvegicus-Rnor_6.0-dbSNP149.genometemplate\sequences\NC_005112_chr13.gbk#0	114033958	NC_005112.4	-	16814	91163691..91146878	116591, 71069		Fcgr2a	Fcgr3, Fcgr3a
LOC103693683	21.3	28.848	0.406	26.93	1.35438	1.07123	0.0150829	0.790932	Z-023508	LOC103693683	gene		D:\assemblies\Rattus_norvegicus-Rnor_6.0-dbSNP149\Rattus_norvegicus-Rnor_6.0-dbSNP149.genometemplate\sequences\NC_005112_chr13.gbk#0	114033958	NC_005112.4	-	8980	91197905..91188926	103693683, 9127992		LOC103693683
Fcer1a	0.065	0.166	0.001	0.85	2.5516	0.194914	0.00111164	0.076389	Z-023520	Fcer1a	gene		D:\assemblies\Rattus_norvegicus-Rnor_6.0-dbSNP149\Rattus_norvegicus-Rnor_6.0-dbSNP149.genometemplate\sequences\NC_005112_chr13.gbk#0	114033958	NC_005112.4	-	9854	91737106..91727253	25047, 2597		Fcer1a	Iger01, RATIGER01
Mptx1	0.093	0.124	0.159	0.001	1.33742	131.327	168.266	98.1945	Z-023522	Mptx1	gene		D:\assemblies\Rattus_norvegicus-Rnor_6.0-dbSNP149\Rattus_norvegicus-Rnor_6.0-dbSNP149.genometemplate\sequences\NC_005112_chr13.gbk#0	114033958	NC_005112.4	-	54305	91827231..91772927	289243, 1590926		Mptx1	Mptx
Aim2	0.637	4.166	25.625	1.148	6.54076	3.62759	22.3136	0.554613	Z-023525	Aim2	gene		D:\assemblies\Rattus_norvegicus-Rnor_6.0-dbSNP149\Rattus_norvegicus-Rnor_6.0-dbSNP149.genometemplate\sequences\NC_005112_chr13.gbk#0	114033958	NC_005112.4	+	43247	91919834..91963080	304987, 1307283		Aim2
Olr1584	0.009	0.001	0.485	0.001	0.103678	1	513.229	9.6452	Z-023529	Olr1584	gene		D:\assemblies\Rattus_norvegicus-Rnor_6.0-dbSNP149\Rattus_norvegicus-Rnor_6.0-dbSNP149.genometemplate\sequences\NC_005112_chr13.gbk#0	114033958	NC_005112.4	+	43627	92064365..92107991	289247, 1334087		Olr1584
LOC102550614	0.001	0.001	0.43	0.001	1	1	455.05	1	Z-023530	LOC102550614	gene		D:\assemblies\Rattus_norvegicus-Rnor_6.0-dbSNP149\Rattus_norvegicus-Rnor_6.0-dbSNP149.genometemplate\sequences\NC_005112_chr13.gbk#0	114033958	NC_005112.4	+	1470	92122907..92124376	102550614, 7723311		LOC102550614
Spta1	7.296	6.839	0.001	7.14	0.937314	0.9578	0.000132366	1.02186	Z-023540	Spta1	gene		D:\assemblies\Rattus_norvegicus-Rnor_6.0-dbSNP149\Rattus_norvegicus-Rnor_6.0-dbSNP149.genometemplate\sequences\NC_005112_chr13.gbk#0	114033958	NC_005112.4	+	75861	92264231..92340091	289257, 1305194		Spta1	Spna1
LOC103692325	0.001	0.001	0.195	0.001	1	1	206.09	1	Z-023561	LOC103692325	gene		D:\assemblies\Rattus_norvegicus-Rnor_6.0-dbSNP149\Rattus_norvegicus-Rnor_6.0-dbSNP149.genometemplate\sequences\NC_005112_chr13.gbk#0	114033958	NC_005112.4	-	23241	93936951..93913711	103692325, 9460837		LOC103692325
LOC102549740	0.001	0.008	0.279	0.001	8.31127	8.31127	295.175	1	Z-023570	LOC102549740	gene		D:\assemblies\Rattus_norvegicus-Rnor_6.0-dbSNP149\Rattus_norvegicus-Rnor_6.0-dbSNP149.genometemplate\sequences\NC_005112_chr13.gbk#0	114033958	NC_005112.4	-	11974	95580293..95568320	102549740, 7673495		LOC102549740
Kif26b	0.189	0.398	0.001	0.301	2.10102	1.32393	0.00314429	0.630136	Z-023584	Kif26b	gene		D:\assemblies\Rattus_norvegicus-Rnor_6.0-dbSNP149\Rattus_norvegicus-Rnor_6.0-dbSNP149.genometemplate\sequences\NC_005112_chr13.gbk#0	114033958	NC_005112.4	-	398114	97173469..96775356	305012, 1560022		Kif26b	RGD1560022, RGD1560572
Hhipl2	0.007	0.001	0.098	0.001	0.141212	1	103.839	7.08157	Z-023666	Hhipl2	gene		D:\assemblies\Rattus_norvegicus-Rnor_6.0-dbSNP149\Rattus_norvegicus-Rnor_6.0-dbSNP149.genometemplate\sequences\NC_005112_chr13.gbk#0	114033958	NC_005112.4	+	20571	101814574..101835144	317051, 1311317		Hhipl2
LOC108352589	0.001	0.001	0.27	0.001	1	1	285.341	1	Z-023678	LOC108352589	gene		D:\assemblies\Rattus_norvegicus-Rnor_6.0-dbSNP149\Rattus_norvegicus-Rnor_6.0-dbSNP149.genometemplate\sequences\NC_005112_chr13.gbk#0	114033958	NC_005112.4	+	4143	102962876..102967018	108352589		LOC108352589
Tgfb2	0.202	0.044	0.001	0.36	0.216315	0.121658	0.00262553	0.562411	Z-023701	Tgfb2	gene		D:\assemblies\Rattus_norvegicus-Rnor_6.0-dbSNP149\Rattus_norvegicus-Rnor_6.0-dbSNP149.genometemplate\sequences\NC_005112_chr13.gbk#0	114033958	NC_005112.4	-	102372	105142010..105039639	81809, 70491		Tgfb2	TGF-B2
LOC103692406	0.014	0.585	0.001	0.109	40.3951	5.39053	0.00870919	0.133445	Z-023714	LOC103692406	gene		D:\assemblies\Rattus_norvegicus-Rnor_6.0-dbSNP149\Rattus_norvegicus-Rnor_6.0-dbSNP149.genometemplate\sequences\NC_005112_chr13.gbk#0	114033958	NC_005112.4	-	2996	107379483..107376488	103692406, 9446452		LOC103692406
LOC102548648	0.004	0.35	0.001	0.169	84.0205	2.07628	0.00560776	0.0247116	Z-023718	LOC102548648	gene		D:\assemblies\Rattus_norvegicus-Rnor_6.0-dbSNP149\Rattus_norvegicus-Rnor_6.0-dbSNP149.genometemplate\sequences\NC_005112_chr13.gbk#0	114033958	NC_005112.4	-	46033	107614922..107568890	102548648, 7537328		LOC102548648
Cenpf	1.443	1.127	0.131	1.376	0.780657	0.81877	0.0951695	1.04882	Z-023721	Cenpf	gene		D:\assemblies\Rattus_norvegicus-Rnor_6.0-dbSNP149\Rattus_norvegicus-Rnor_6.0-dbSNP149.genometemplate\sequences\NC_005112_chr13.gbk#0	114033958	NC_005112.4	-	46111	108178609..108132499	257649, 628667		Cenpf	Lek1
Nek2	3.328	11.045	0.17	6.095	3.31866	1.81219	0.0278548	0.54606	Z-023759	Nek2	gene		D:\assemblies\Rattus_norvegicus-Rnor_6.0-dbSNP149\Rattus_norvegicus-Rnor_6.0-dbSNP149.genometemplate\sequences\NC_005112_chr13.gbk#0	114033958	NC_005112.4	+	13205	110511546..110524750	114482, 619792		Nek2
Traf3ip3	0.952	0.12	132.418	0.572	0.125976	0.209544	231.451	1.66336	Z-023777	Traf3ip3	gene		D:\assemblies\Rattus_norvegicus-Rnor_6.0-dbSNP149\Rattus_norvegicus-Rnor_6.0-dbSNP149.genometemplate\sequences\NC_005112_chr13.gbk#0	114033958	NC_005112.4	-	24625	111917368..111892744	360900, 1304848		Traf3ip3	RGD1304848
LOC108352604	0.086	0.102	22.216	0.186	1.18729	0.548147	119.751	0.461679	Z-023798	LOC108352604	gene		D:\assemblies\Rattus_norvegicus-Rnor_6.0-dbSNP149\Rattus_norvegicus-Rnor_6.0-dbSNP149.genometemplate\sequences\NC_005112_chr13.gbk#0	114033958	NC_005112.4	+	6895	113818894..113825788	108352604		LOC108352604
Cr2	0.005	0.004	16.004	0.153	0.847183	0.0261323	104.702	0.0308461	Z-023800	Cr2	gene		D:\assemblies\Rattus_norvegicus-Rnor_6.0-dbSNP149\Rattus_norvegicus-Rnor_6.0-dbSNP149.genometemplate\sequences\NC_005112_chr13.gbk#0	114033958	NC_005112.4	-	37551	113927824..113890274	289395, 1310065		Cr2	Cd21
Crlf2	2.653	6.806	23.784	2.143	2.56519	3.17548	11.0969	1.23791	Z-023817	Crlf2	gene		D:\assemblies\Rattus_norvegicus-Rnor_6.0-dbSNP149\Rattus_norvegicus-Rnor_6.0-dbSNP149.genometemplate\sequences\NC_005113_chr14.gbk#0	115493446	NC_005113.4	-	4701	1461543..1456843	171499, 621078		Crlf2	Crl2, Tpte2, Tslpr
LOC102556623	0.601	1.43	127.572	1.613	2.37822	0.886571	79.0761	0.372787	Z-023890	LOC102556623	gene		D:\assemblies\Rattus_norvegicus-Rnor_6.0-dbSNP149\Rattus_norvegicus-Rnor_6.0-dbSNP149.genometemplate\sequences\NC_005113_chr14.gbk#0	115493446	NC_005113.4	-	2299	5761039..5758741	102556623, 7593373		LOC102556623
LOC100910198	0.091	2.798	0.001	1.5	30.854	1.86471	0.000629924	0.0604366	Z-023914	LOC100910198	gene		D:\assemblies\Rattus_norvegicus-Rnor_6.0-dbSNP149\Rattus_norvegicus-Rnor_6.0-dbSNP149.genometemplate\sequences\NC_005113_chr14.gbk#0	115493446	NC_005113.4	+	11334	6780752..6792085	100910198, 6499958		LOC100910198
Ibsp	20.533	11.28	0.001	9.612	0.549359	1.17355	9.83294e-05	2.13622	Z-023916	Ibsp	gene		D:\assemblies\Rattus_norvegicus-Rnor_6.0-dbSNP149\Rattus_norvegicus-Rnor_6.0-dbSNP149.genometemplate\sequences\NC_005113_chr14.gbk#0	115493446	NC_005113.4	-	12788	6813987..6801200	24477, 2855		Ibsp	Bsp
LOC103693723	0.001	0.001	0.112	0.001	1	1	119.03	1	Z-023947	LOC103693723	gene		D:\assemblies\Rattus_norvegicus-Rnor_6.0-dbSNP149\Rattus_norvegicus-Rnor_6.0-dbSNP149.genometemplate\sequences\NC_005113_chr14.gbk#0	115493446	NC_005113.4	+	3003	9313300..9316302	103693723, 9338365		LOC103693723
LOC108352710	0.001	0.004	0.038	0.001	4.53925	4.53925	40.1792	1	Z-023960	LOC108352710	gene		D:\assemblies\Rattus_norvegicus-Rnor_6.0-dbSNP149\Rattus_norvegicus-Rnor_6.0-dbSNP149.genometemplate\sequences\NC_005113_chr14.gbk#0	115493446	NC_005113.4	+	5761	10520520..10526280	108352710		LOC108352710
Pf4	265.307	795.729	6.048	203.788	2.99928	3.90469	0.0296765	1.30188	Z-024060	Pf4	gene		D:\assemblies\Rattus_norvegicus-Rnor_6.0-dbSNP149\Rattus_norvegicus-Rnor_6.0-dbSNP149.genometemplate\sequences\NC_005113_chr14.gbk#0	115493446	NC_005113.4	-	710	18849258..18848549	360918, 3305		Pf4	Cxcl4, PF-4, Pf4a, RATPF4A
Ppbp	49.296	142.775	0.001	46.399	2.89629	3.07709	2.03695e-05	1.06242	Z-024061	Ppbp	gene		D:\assemblies\Rattus_norvegicus-Rnor_6.0-dbSNP149\Rattus_norvegicus-Rnor_6.0-dbSNP149.genometemplate\sequences\NC_005113_chr14.gbk#0	115493446	NC_005113.4	-	805	18853237..18852433	246358, 70548		Ppbp	Cxcl7, Nap-2
Alb	0.007	0.001	0.098	0.001	0.133982	1	103.942	7.46369	Z-024069	Alb	gene		D:\assemblies\Rattus_norvegicus-Rnor_6.0-dbSNP149\Rattus_norvegicus-Rnor_6.0-dbSNP149.genometemplate\sequences\NC_005113_chr14.gbk#0	115493446	NC_005113.4	-	15519	19191793..19176275	24186, 2085		Alb	Alb1, Albza
Gc	0.031	0.033	0.147	0.001	1.05343	34.7783	155.214	33.0144	Z-024076	Gc	gene		D:\assemblies\Rattus_norvegicus-Rnor_6.0-dbSNP149\Rattus_norvegicus-Rnor_6.0-dbSNP149.genometemplate\sequences\NC_005113_chr14.gbk#0	115493446	NC_005113.4	+	35555	20267023..20302577	24384, 2667		Gc	DBP, DBP02, VDB, Vdbp
Prol1	0.001	0.001	0.502	0.001	1	1	531.151	1	Z-024092	Prol1	gene		D:\assemblies\Rattus_norvegicus-Rnor_6.0-dbSNP149\Rattus_norvegicus-Rnor_6.0-dbSNP149.genometemplate\sequences\NC_005113_chr14.gbk#0	115493446	NC_005113.4	-	15070	21353533..21338464	65182, 620983		Prol1	Muc10, RSM-1
Tmprss11d	0.001	0.001	0.336	0.001	1	1	355.74	1	Z-024132	Tmprss11d	gene		D:\assemblies\Rattus_norvegicus-Rnor_6.0-dbSNP149\Rattus_norvegicus-Rnor_6.0-dbSNP149.genometemplate\sequences\NC_005113_chr14.gbk#0	115493446	NC_005113.4	+	62061	23330933..23392993	64565, 620654		Tmprss11d	Asp
Hopx	37.663	74.559	3.92	36.804	1.97963	2.02587	0.106515	1.02336	Z-024168	Hopx	gene		D:\assemblies\Rattus_norvegicus-Rnor_6.0-dbSNP149\Rattus_norvegicus-Rnor_6.0-dbSNP149.genometemplate\sequences\NC_005113_chr14.gbk#0	115493446	NC_005113.4	+	7745	33354803..33362547	171160, 621841		Hopx	GIIg15b, Hod, Obl
LOC103693742	7.522	17.346	0.947	9.649	2.30593	1.79777	0.0981598	0.779631	Z-024184	LOC103693742	gene		D:\assemblies\Rattus_norvegicus-Rnor_6.0-dbSNP149\Rattus_norvegicus-Rnor_6.0-dbSNP149.genometemplate\sequences\NC_005113_chr14.gbk#0	115493446	NC_005113.4	+	337	33942844..33943180	103693742, 9376224		LOC103693742
LOC103693743	7.522	17.346	0.947	9.649	2.30593	1.79777	0.0981598	0.779631	Z-024185	LOC103693743	gene		D:\assemblies\Rattus_norvegicus-Rnor_6.0-dbSNP149\Rattus_norvegicus-Rnor_6.0-dbSNP149.genometemplate\sequences\NC_005113_chr14.gbk#0	115493446	NC_005113.4	+	337	33949017..33949353	103693743, 9231553		LOC103693743
Cnga1	0.001	0.001	0.448	0.001	1	1	473.977	1	Z-024239	Cnga1	gene		D:\assemblies\Rattus_norvegicus-Rnor_6.0-dbSNP149\Rattus_norvegicus-Rnor_6.0-dbSNP149.genometemplate\sequences\NC_005113_chr14.gbk#0	115493446	NC_005113.4	+	15337	38155771..38171107	85259, 621815		Cnga1	Cncg, HCN
Shisa3	0.001	0.001	1.269	0.001	1	1	1342.4	1	Z-024256	Shisa3	gene		D:\assemblies\Rattus_norvegicus-Rnor_6.0-dbSNP149\Rattus_norvegicus-Rnor_6.0-dbSNP149.genometemplate\sequences\NC_005113_chr14.gbk#0	115493446	NC_005113.4	-	4573	42221225..42216653	498356, 1565710		Shisa3	RGD1565710
LOC103692861	0.001	0.005	0.326	0.001	4.77423	4.77423	345.44	1	Z-024272	LOC103692861	gene		D:\assemblies\Rattus_norvegicus-Rnor_6.0-dbSNP149\Rattus_norvegicus-Rnor_6.0-dbSNP149.genometemplate\sequences\NC_005113_chr14.gbk#0	115493446	NC_005113.4	-	10946	43946371..43935426	103692861, 9312075		LOC103692861
Rhoh	3.73	10.837	86.604	5.169	2.9053	2.09655	16.7541	0.721628	Z-024273	Rhoh	gene		D:\assemblies\Rattus_norvegicus-Rnor_6.0-dbSNP149\Rattus_norvegicus-Rnor_6.0-dbSNP149.genometemplate\sequences\NC_005113_chr14.gbk#0	115493446	NC_005113.4	-	30832	43992587..43961756	305341, 1307623		Rhoh
Tlr10	0.001	0.006	0.407	0.001	6.39161	6.39161	430.152	1	Z-024295	Tlr10	gene		D:\assemblies\Rattus_norvegicus-Rnor_6.0-dbSNP149\Rattus_norvegicus-Rnor_6.0-dbSNP149.genometemplate\sequences\NC_005113_chr14.gbk#0	115493446	NC_005113.4	+	8591	45073652..45082242	305355, 1311569		Tlr10
Rn45s	236.848	644.7	27311.3	168.766	2.72201	3.82009	161.83	1.40341	Z-024311	Rn45s	gene		D:\assemblies\Rattus_norvegicus-Rnor_6.0-dbSNP149\Rattus_norvegicus-Rnor_6.0-dbSNP149.genometemplate\sequences\NC_005113_chr14.gbk#0	115493446	NC_005113.4	+	12342	46643222..46655563	24723		Rn45s
Ppargc1a	0.003	0.001	0.263	0.001	0.286193	1	278.317	3.49415	Z-024359	Ppargc1a	gene		D:\assemblies\Rattus_norvegicus-Rnor_6.0-dbSNP149\Rattus_norvegicus-Rnor_6.0-dbSNP149.genometemplate\sequences\NC_005113_chr14.gbk#0	115493446	NC_005113.4	+	95398	63095291..63190688	83516, 620925		Ppargc1a	Ppargc1
Crmp1	0.001	0.001	0.284	0.001	1	1	300.779	1	Z-024446	Crmp1	gene		D:\assemblies\Rattus_norvegicus-Rnor_6.0-dbSNP149\Rattus_norvegicus-Rnor_6.0-dbSNP149.genometemplate\sequences\NC_005113_chr14.gbk#0	115493446	NC_005113.4	-	45847	78312777..78266931	25415, 2407		Crmp1
LOC102553825	0.001	0.001	0.106	0.001	1	1	111.827	1	Z-024447	LOC102553825	gene		D:\assemblies\Rattus_norvegicus-Rnor_6.0-dbSNP149\Rattus_norvegicus-Rnor_6.0-dbSNP149.genometemplate\sequences\NC_005113_chr14.gbk#0	115493446	NC_005113.4	-	78168	78402278..78324111	102553825, 7596857		LOC102553825
Fam53a	1.725	3.08	16.095	1.7	1.7853	1.81163	9.46764	1.01475	Z-024514	Fam53a	gene		D:\assemblies\Rattus_norvegicus-Rnor_6.0-dbSNP149\Rattus_norvegicus-Rnor_6.0-dbSNP149.genometemplate\sequences\NC_005113_chr14.gbk#0	115493446	NC_005113.4	+	40919	82375086..82416004	305461, 1563315		Fam53a	RGD1563315
LOC108352784	0.008	0.05	0.001	0.079	6.50371	0.634554	0.0119747	0.097568	Z-024539	LOC108352784	gene		D:\assemblies\Rattus_norvegicus-Rnor_6.0-dbSNP149\Rattus_norvegicus-Rnor_6.0-dbSNP149.genometemplate\sequences\NC_005113_chr14.gbk#0	115493446	NC_005113.4	+	5636	83826530..83832165	108352784		LOC108352784
Gas2l1	33.935	65.753	1.314	40.067	1.93758	1.64105	0.0327893	0.846956	Z-024576	Gas2l1	gene		D:\assemblies\Rattus_norvegicus-Rnor_6.0-dbSNP149\Rattus_norvegicus-Rnor_6.0-dbSNP149.genometemplate\sequences\NC_005113_chr14.gbk#0	115493446	NC_005113.4	-	10033	85318475..85308443	360973, 1311206		Gas2l1
LOC102547700	1.959	3.778	39.514	2.865	1.92806	1.31859	13.7927	0.683897	Z-024619	LOC102547700	gene		D:\assemblies\Rattus_norvegicus-Rnor_6.0-dbSNP149\Rattus_norvegicus-Rnor_6.0-dbSNP149.genometemplate\sequences\NC_005113_chr14.gbk#0	115493446	NC_005113.4	-	3051	86803390..86800340	102547700, 7606883		LOC102547700
Sun3	0.001	0.009	0.164	0.001	9.17332	9.17332	173.501	1	Z-024644	Sun3	gene		D:\assemblies\Rattus_norvegicus-Rnor_6.0-dbSNP149\Rattus_norvegicus-Rnor_6.0-dbSNP149.genometemplate\sequences\NC_005113_chr14.gbk#0	115493446	NC_005113.4	-	38200	89253585..89215386	498412, 1591975		Sun3
LOC501396	0.256	0.742	0.001	0.539	2.89367	1.37694	0.00175499	0.475846	Z-024668	LOC501396	gene		D:\assemblies\Rattus_norvegicus-Rnor_6.0-dbSNP149\Rattus_norvegicus-Rnor_6.0-dbSNP149.genometemplate\sequences\NC_005113_chr14.gbk#0	115493446	NC_005113.4	+	292121	94321030..94613150	501396, 1566206		LOC501396
Vstm2a	0.089	0.016	0.001	0.361	0.178401	0.0442575	0.00262067	0.248078	Z-024677	Vstm2a	gene		D:\assemblies\Rattus_norvegicus-Rnor_6.0-dbSNP149\Rattus_norvegicus-Rnor_6.0-dbSNP149.genometemplate\sequences\NC_005113_chr14.gbk#0	115493446	NC_005113.4	+	29309	99528996..99558304	689106, 1596197		Vstm2a
LOC103693205	0.001	0.007	0.233	0.001	7.40156	7.40156	246.319	1	Z-024698	LOC103693205	gene		D:\assemblies\Rattus_norvegicus-Rnor_6.0-dbSNP149\Rattus_norvegicus-Rnor_6.0-dbSNP149.genometemplate\sequences\NC_005113_chr14.gbk#0	115493446	NC_005113.4	+	4854	104133427..104138280	103693205, 9175426		LOC103693205
LOC103693221	0.001	0.003	0.044	0.001	3.22361	3.22361	46.7897	1	Z-024717	LOC103693221	gene		D:\assemblies\Rattus_norvegicus-Rnor_6.0-dbSNP149\Rattus_norvegicus-Rnor_6.0-dbSNP149.genometemplate\sequences\NC_005113_chr14.gbk#0	115493446	NC_005113.4	+	67848	105427992..105495839	103693221, 9220236		LOC103693221
LOC102552343	0.467	0.146	2.201	0.17	0.311759	0.857263	12.9695	2.74976	Z-024740	LOC102552343	gene		D:\assemblies\Rattus_norvegicus-Rnor_6.0-dbSNP149\Rattus_norvegicus-Rnor_6.0-dbSNP149.genometemplate\sequences\NC_005113_chr14.gbk#0	115493446	NC_005113.4	+	1740	107617199..107618938	102552343, 7604623		LOC102552343
Ahsa2	4.062	11.363	34.612	3.891	2.79715	2.92036	8.89549	1.04405	Z-024753	Ahsa2	gene		D:\assemblies\Rattus_norvegicus-Rnor_6.0-dbSNP149\Rattus_norvegicus-Rnor_6.0-dbSNP149.genometemplate\sequences\NC_005113_chr14.gbk#0	115493446	NC_005113.4	-	11206	108274000..108262795	305577, 1307171		Ahsa2
LOC690352	0.001	0.001	1.59	0.001	1	1	1682.24	1	Z-024754	LOC690352	gene		D:\assemblies\Rattus_norvegicus-Rnor_6.0-dbSNP149\Rattus_norvegicus-Rnor_6.0-dbSNP149.genometemplate\sequences\NC_005113_chr14.gbk#0	115493446	NC_005113.4	-	3101	108285008..108281908	690352, 1597336		LOC690352
Efemp1	0.01	0.005	0.628	0.001	0.554141	5.58746	664.568	10.0831	Z-024780	Efemp1	gene		D:\assemblies\Rattus_norvegicus-Rnor_6.0-dbSNP149\Rattus_norvegicus-Rnor_6.0-dbSNP149.genometemplate\sequences\NC_005113_chr14.gbk#0	115493446	NC_005113.4	+	92612	113202382..113294993	305604, 1308528		Efemp1	T16
Mtif2	1.166	2.502	32.529	2.245	2.14651	1.11456	14.4894	0.519245	Z-024788	Mtif2	gene		D:\assemblies\Rattus_norvegicus-Rnor_6.0-dbSNP149\Rattus_norvegicus-Rnor_6.0-dbSNP149.genometemplate\sequences\NC_005113_chr14.gbk#0	115493446	NC_005113.4	+	19491	113946084..113965574	305606, 1303046		Mtif2
LOC103693245	0.001	0.001	0.038	0.001	1	1	39.8184	1	Z-024810	LOC103693245	gene		D:\assemblies\Rattus_norvegicus-Rnor_6.0-dbSNP149\Rattus_norvegicus-Rnor_6.0-dbSNP149.genometemplate\sequences\NC_005114_chr15.gbk#0	111246239	NC_005114.4	-	17500	2153759..2136260	103693245, 9430192		LOC103693245
Vcl	3.402	6.144	0.329	4.786	1.80587	1.2839	0.0686684	0.710957	Z-024831	Vcl	gene		D:\assemblies\Rattus_norvegicus-Rnor_6.0-dbSNP149\Rattus_norvegicus-Rnor_6.0-dbSNP149.genometemplate\sequences\NC_005114_chr15.gbk#0	111246239	NC_005114.4	-	89528	3544738..3455211	305679, 1311217		Vcl
LOC103693236	0.008	0.001	0.48	0.001	0.125918	1	507.806	7.94166	Z-024846	LOC103693236	gene		D:\assemblies\Rattus_norvegicus-Rnor_6.0-dbSNP149\Rattus_norvegicus-Rnor_6.0-dbSNP149.genometemplate\sequences\NC_005114_chr15.gbk#0	111246239	NC_005114.4	-	5444	4189248..4183805	103693236, 9190083		LOC103693236
Mss51	0.052	0.041	16.066	0.3	0.798509	0.137842	53.6255	0.172624	Z-024849	Mss51	gene		D:\assemblies\Rattus_norvegicus-Rnor_6.0-dbSNP149\Rattus_norvegicus-Rnor_6.0-dbSNP149.genometemplate\sequences\NC_005114_chr15.gbk#0	111246239	NC_005114.4	+	11870	4240203..4252072	289904, 1309408		Mss51	Zmynd17
LOC498465	0.001	0.001	2.926	0.001	1	1	3095.38	1	Z-024867	LOC498465	gene		D:\assemblies\Rattus_norvegicus-Rnor_6.0-dbSNP149\Rattus_norvegicus-Rnor_6.0-dbSNP149.genometemplate\sequences\NC_005114_chr15.gbk#0	111246239	NC_005114.4	-	15621	5088004..5072384	498465, 1561032		LOC498465
LOC108352875	0.001	0.001	0.375	0.001	1	1	396.915	1	Z-024868	LOC108352875	gene		D:\assemblies\Rattus_norvegicus-Rnor_6.0-dbSNP149\Rattus_norvegicus-Rnor_6.0-dbSNP149.genometemplate\sequences\NC_005114_chr15.gbk#0	111246239	NC_005114.4	-	7452	5107881..5100430	108352875		LOC108352875
Cd99l2	0.001	0.006	0.302	0.001	6.18961	6.18961	319.335	1	Z-024871	Cd99l2	gene		D:\assemblies\Rattus_norvegicus-Rnor_6.0-dbSNP149\Rattus_norvegicus-Rnor_6.0-dbSNP149.genometemplate\sequences\NC_005114_chr15.gbk#0	111246239	NC_005114.4	+	45976	5265257..5311232	171485, 620896		Cd99l2	Mic2l1, vms-tm2
LOC102550211	0.001	0.006	0.082	0.001	6.07862	6.07862	86.7541	1	Z-024883	LOC102550211	gene		D:\assemblies\Rattus_norvegicus-Rnor_6.0-dbSNP149\Rattus_norvegicus-Rnor_6.0-dbSNP149.genometemplate\sequences\NC_005114_chr15.gbk#0	111246239	NC_005114.4	+	81594	5771821..5853414	102550211, 7677163		LOC102550211
Zfp385d	0.401	1.37	0.001	0.15	3.41388	9.14021	0.00630633	2.67737	Z-024888	Zfp385d	gene		D:\assemblies\Rattus_norvegicus-Rnor_6.0-dbSNP149\Rattus_norvegicus-Rnor_6.0-dbSNP149.genometemplate\sequences\NC_005114_chr15.gbk#0	111246239	NC_005114.4	-	1048344	7249168..6200825	305691, 1359606		Zfp385d	Znf385d
LOC103693276	0.014	0.01	0.037	0.001	0.759654	11.109	39.6273	14.6238	Z-024904	LOC103693276	gene		D:\assemblies\Rattus_norvegicus-Rnor_6.0-dbSNP149\Rattus_norvegicus-Rnor_6.0-dbSNP149.genometemplate\sequences\NC_005114_chr15.gbk#0	111246239	NC_005114.4	+	5636	10435635..10441270	103693276, 9116778		LOC103693276
LOC102548219	0.001	0.099	0.119	0.001	104.472	104.472	125.454	1	Z-024950	LOC102548219	gene		D:\assemblies\Rattus_norvegicus-Rnor_6.0-dbSNP149\Rattus_norvegicus-Rnor_6.0-dbSNP149.genometemplate\sequences\NC_005114_chr15.gbk#0	111246239	NC_005114.4	-	9671	17882719..17873049	102548219, 7598626		LOC102548219
LOC108353018	0.001	0.008	0.001	0.157	8.73413	0.052516	0.00601273	0.00601273	Z-024951	LOC108353018	gene		D:\assemblies\Rattus_norvegicus-Rnor_6.0-dbSNP149\Rattus_norvegicus-Rnor_6.0-dbSNP149.genometemplate\sequences\NC_005114_chr15.gbk#0	111246239	NC_005114.4	+	2114	17897229..17899342	108353018		LOC108353018
Fam3d	0.001	0.001	5.006	0.001	1	1	5297.05	1	Z-024962	Fam3d	gene		D:\assemblies\Rattus_norvegicus-Rnor_6.0-dbSNP149\Rattus_norvegicus-Rnor_6.0-dbSNP149.genometemplate\sequences\NC_005114_chr15.gbk#0	111246239	NC_005114.4	+	35496	18321757..18357252	289949, 1305512		Fam3d	Oit1
LOC103693298	0.445	2.691	18.479	1.824	6.04809	1.47505	10.1308	0.243886	Z-024968	LOC103693298	gene		D:\assemblies\Rattus_norvegicus-Rnor_6.0-dbSNP149\Rattus_norvegicus-Rnor_6.0-dbSNP149.genometemplate\sequences\NC_005114_chr15.gbk#0	111246239	NC_005114.4	+	1359	18547255..18548613	103693298, 9295098		LOC103693298
LOC102548186	0.038	0.009	0.001	0.307	0.232127	0.0283481	0.00307394	0.122123	Z-024998	LOC102548186	gene		D:\assemblies\Rattus_norvegicus-Rnor_6.0-dbSNP149\Rattus_norvegicus-Rnor_6.0-dbSNP149.genometemplate\sequences\NC_005114_chr15.gbk#0	111246239	NC_005114.4	+	12197	20790135..20802331	102548186, 7548933		LOC102548186
Tlr11	0.001	0.001	0.515	0.001	1	1	544.392	1	Z-025062	Tlr11	gene		D:\assemblies\Rattus_norvegicus-Rnor_6.0-dbSNP149\Rattus_norvegicus-Rnor_6.0-dbSNP149.genometemplate\sequences\NC_005114_chr15.gbk#0	111246239	NC_005114.4	+	4440	27177900..27182339	498491, 1564460		Tlr11	RGD1564460
Rmrp	0.001	0.001	25.225	0.001	1	1	26689	1	Z-025080	Rmrp	gene		D:\assemblies\Rattus_norvegicus-Rnor_6.0-dbSNP149\Rattus_norvegicus-Rnor_6.0-dbSNP149.genometemplate\sequences\NC_005114_chr15.gbk#0	111246239	NC_005114.4	-	257	27739245..27738989	29536, 3580		Rmrp	Rmrp1
Rnase9	0.001	0.001	0.275	0.001	1	1	290.844	1	Z-025090	Rnase9	gene		D:\assemblies\Rattus_norvegicus-Rnor_6.0-dbSNP149\Rattus_norvegicus-Rnor_6.0-dbSNP149.genometemplate\sequences\NC_005114_chr15.gbk#0	111246239	NC_005114.4	-	4493	27968492..27964000	364301, 1359501		Rnase9
Ang	0.009	0.01	0.385	0.001	1.0847	10.8474	407.412	10.0004	Z-025094	Ang	gene		D:\assemblies\Rattus_norvegicus-Rnor_6.0-dbSNP149\Rattus_norvegicus-Rnor_6.0-dbSNP149.genometemplate\sequences\NC_005114_chr15.gbk#0	111246239	NC_005114.4	+	5711	28022926..28028636	305843, 1594539		Ang	Ang1
LOC103690354	0.006	0.008	13.434	0.001	1.38644	8.25834	14214.2	5.95652	Z-025098	LOC103690354	gene		D:\assemblies\Rattus_norvegicus-Rnor_6.0-dbSNP149\Rattus_norvegicus-Rnor_6.0-dbSNP149.genometemplate\sequences\NC_005114_chr15.gbk#0	111246239	NC_005114.4	+	1715	28073963..28075677	103690354, 9117758		LOC103690354
Rnase6	0.165	0.01	5.206	0.001	0.0628197	10.994	5507.9	175.008	Z-025099	Rnase6	gene		D:\assemblies\Rattus_norvegicus-Rnor_6.0-dbSNP149\Rattus_norvegicus-Rnor_6.0-dbSNP149.genometemplate\sequences\NC_005114_chr15.gbk#0	111246239	NC_005114.4	-	3963	28084269..28080307	305842, 1303020		Rnase6
Ang2	0.001	0.006	0.381	0.001	6.08468	6.08468	402.598	1	Z-025101	Ang2	gene		D:\assemblies\Rattus_norvegicus-Rnor_6.0-dbSNP149\Rattus_norvegicus-Rnor_6.0-dbSNP149.genometemplate\sequences\NC_005114_chr15.gbk#0	111246239	NC_005114.4	-	17807	28121494..28103688	497229, 1359373		Ang2	Ang, Raa2
LOC100361814	8.096	8.772	0.001	4.465	1.08354	1.96466	0.000211675	1.8132	Z-025104	LOC100361814	gene		D:\assemblies\Rattus_norvegicus-Rnor_6.0-dbSNP149\Rattus_norvegicus-Rnor_6.0-dbSNP149.genometemplate\sequences\NC_005114_chr15.gbk#0	111246239	NC_005114.4	-	890	28192580..28191691	100361814, 2324569		LOC100361814
Rnase17	2.539	5.474	0.001	2.038	2.15571	2.68514	0.00046365	1.24559	Z-025105	Rnase17	gene		D:\assemblies\Rattus_norvegicus-Rnor_6.0-dbSNP149\Rattus_norvegicus-Rnor_6.0-dbSNP149.genometemplate\sequences\NC_005114_chr15.gbk#0	111246239	NC_005114.4	-	887	28204929..28204043	497195, 1359245		Rnase17	R17
Ear11	5.962	14.34	0.001	6.267	2.40511	2.28801	0.000150804	0.951312	Z-025106	Ear11	gene		D:\assemblies\Rattus_norvegicus-Rnor_6.0-dbSNP149\Rattus_norvegicus-Rnor_6.0-dbSNP149.genometemplate\sequences\NC_005114_chr15.gbk#0	111246239	NC_005114.4	-	871	28217614..28216744	192264, 621580		Ear11	EAR, ECP, R1, R7, Rnase3
LOC100361866	5.962	14.34	0.001	6.267	2.40511	2.28801	0.000150804	0.951312	Z-025107	LOC100361866	gene		D:\assemblies\Rattus_norvegicus-Rnor_6.0-dbSNP149\Rattus_norvegicus-Rnor_6.0-dbSNP149.genometemplate\sequences\NC_005114_chr15.gbk#0	111246239	NC_005114.4	-	919	28241466..28240548	100361866, 2319312		LOC100361866
Rpgrip1	0.07	0.607	3.943	0.121	8.71038	5.03124	32.6617	0.577614	Z-025120	Rpgrip1	gene		D:\assemblies\Rattus_norvegicus-Rnor_6.0-dbSNP149\Rattus_norvegicus-Rnor_6.0-dbSNP149.genometemplate\sequences\NC_005114_chr15.gbk#0	111246239	NC_005114.4	+	53760	28521287..28575046	305850, 1310807		Rpgrip1
LOC686863	0.006	0.001	0.904	0.001	0.148084	1	956.987	6.75294	Z-025138	LOC686863	gene		D:\assemblies\Rattus_norvegicus-Rnor_6.0-dbSNP149\Rattus_norvegicus-Rnor_6.0-dbSNP149.genometemplate\sequences\NC_005114_chr15.gbk#0	111246239	NC_005114.4	+	665	29073593..29074257	686863		LOC686863
LOC103693827	0.001	0.001	0.203	0.001	1	1	214.464	1	Z-025143	LOC103693827	gene		D:\assemblies\Rattus_norvegicus-Rnor_6.0-dbSNP149\Rattus_norvegicus-Rnor_6.0-dbSNP149.genometemplate\sequences\NC_005114_chr15.gbk#0	111246239	NC_005114.4	+	907	29208554..29209460	103693827		LOC103693827
LOC684877	0.001	0.001	0.277	0.001	1	1	293.236	1	Z-025144	LOC684877	gene		D:\assemblies\Rattus_norvegicus-Rnor_6.0-dbSNP149\Rattus_norvegicus-Rnor_6.0-dbSNP149.genometemplate\sequences\NC_005114_chr15.gbk#0	111246239	NC_005114.4	-	5070	29218112..29213043	684877		LOC684877
LOC102556013	0.001	0.001	0.277	0.001	1	1	293.236	1	Z-025146	LOC102556013	gene		D:\assemblies\Rattus_norvegicus-Rnor_6.0-dbSNP149\Rattus_norvegicus-Rnor_6.0-dbSNP149.genometemplate\sequences\NC_005114_chr15.gbk#0	111246239	NC_005114.4	-	5070	29246485..29241416	102556013		LOC102556013
LOC691226	0.001	0.03	0.178	0.001	31.4059	31.4059	188.701	1	Z-025151	LOC691226	gene		D:\assemblies\Rattus_norvegicus-Rnor_6.0-dbSNP149\Rattus_norvegicus-Rnor_6.0-dbSNP149.genometemplate\sequences\NC_005114_chr15.gbk#0	111246239	NC_005114.4	-	868	29299712..29298845	691226		LOC691226
LOC684995	0.001	0.001	1.192	0.001	1	1	1260.83	1	Z-025154	LOC684995	gene		D:\assemblies\Rattus_norvegicus-Rnor_6.0-dbSNP149\Rattus_norvegicus-Rnor_6.0-dbSNP149.genometemplate\sequences\NC_005114_chr15.gbk#0	111246239	NC_005114.4	-	1711	29370193..29368483	684995		LOC684995
LOC103693830	0.001	0.049	1.147	0.001	51.9499	51.9499	1214.1	1	Z-025155	LOC103693830	gene		D:\assemblies\Rattus_norvegicus-Rnor_6.0-dbSNP149\Rattus_norvegicus-Rnor_6.0-dbSNP149.genometemplate\sequences\NC_005114_chr15.gbk#0	111246239	NC_005114.4	-	1352	29394279..29392928	103693830		LOC103693830
LOC100363055	0.001	0.001	1.655	0.001	1	1	1751.52	1	Z-025156	LOC100363055	gene		D:\assemblies\Rattus_norvegicus-Rnor_6.0-dbSNP149\Rattus_norvegicus-Rnor_6.0-dbSNP149.genometemplate\sequences\NC_005114_chr15.gbk#0	111246239	NC_005114.4	-	1170	29403469..29402300	100363055, 2324834		LOC100363055
LOC102546567	0.001	0.011	5.473	0.001	12.0781	12.0781	5790.21	1	Z-025157	LOC102546567	gene		D:\assemblies\Rattus_norvegicus-Rnor_6.0-dbSNP149\Rattus_norvegicus-Rnor_6.0-dbSNP149.genometemplate\sequences\NC_005114_chr15.gbk#0	111246239	NC_005114.4	-	816	29430835..29430020	102546567, 11051974		LOC102546567
LOC103693831	0.001	0.001	1.298	0.001	1	1	1373.35	1	Z-025158	LOC103693831	gene		D:\assemblies\Rattus_norvegicus-Rnor_6.0-dbSNP149\Rattus_norvegicus-Rnor_6.0-dbSNP149.genometemplate\sequences\NC_005114_chr15.gbk#0	111246239	NC_005114.4	-	574	29443446..29442873	103693831, 9441284		LOC103693831
LOC691308	0.001	0.001	0.14	0.001	1	1	148.536	1	Z-025165	LOC691308	gene		D:\assemblies\Rattus_norvegicus-Rnor_6.0-dbSNP149\Rattus_norvegicus-Rnor_6.0-dbSNP149.genometemplate\sequences\NC_005114_chr15.gbk#0	111246239	NC_005114.4	-	1128	29639439..29638312	691308		LOC691308
LOC108348207	0.001	0.001	0.505	0.001	1	1	534.188	1	Z-025166	LOC108348207	gene		D:\assemblies\Rattus_norvegicus-Rnor_6.0-dbSNP149\Rattus_norvegicus-Rnor_6.0-dbSNP149.genometemplate\sequences\NC_005114_chr15.gbk#0	111246239	NC_005114.4	-	5392	29662841..29657450	108348207		LOC108348207
LOC102549848	0.001	0.001	0.303	0.001	1	1	320.84	1	Z-025168	LOC102549848	gene		D:\assemblies\Rattus_norvegicus-Rnor_6.0-dbSNP149\Rattus_norvegicus-Rnor_6.0-dbSNP149.genometemplate\sequences\NC_005114_chr15.gbk#0	111246239	NC_005114.4	-	1974	29681351..29679378	102549848		LOC102549848
LOC102550120	0.001	0.001	0.277	0.001	1	1	293.236	1	Z-025171	LOC102550120	gene		D:\assemblies\Rattus_norvegicus-Rnor_6.0-dbSNP149\Rattus_norvegicus-Rnor_6.0-dbSNP149.genometemplate\sequences\NC_005114_chr15.gbk#0	111246239	NC_005114.4	-	5070	29761413..29756344	102550120		LOC102550120
LOC102550377	0.001	0.03	0.178	0.001	31.4059	31.4059	188.701	1	Z-025176	LOC102550377	gene		D:\assemblies\Rattus_norvegicus-Rnor_6.0-dbSNP149\Rattus_norvegicus-Rnor_6.0-dbSNP149.genometemplate\sequences\NC_005114_chr15.gbk#0	111246239	NC_005114.4	-	1001	29816421..29815421	102550377		LOC102550377
LOC102551600	0.001	0.001	0.589	0.001	1	1	623.665	1	Z-025179	LOC102551600	gene		D:\assemblies\Rattus_norvegicus-Rnor_6.0-dbSNP149\Rattus_norvegicus-Rnor_6.0-dbSNP149.genometemplate\sequences\NC_005114_chr15.gbk#0	111246239	NC_005114.4	-	2442	29898397..29895956	102551600		LOC102551600
LOC102552633	0.001	0.001	0.284	0.001	1	1	300.308	1	Z-025181	LOC102552633	gene		D:\assemblies\Rattus_norvegicus-Rnor_6.0-dbSNP149\Rattus_norvegicus-Rnor_6.0-dbSNP149.genometemplate\sequences\NC_005114_chr15.gbk#0	111246239	NC_005114.4	-	1095	29977141..29976047	102552633		LOC102552633
LOC108352910	0.001	0.005	0.954	0.001	5.39266	5.39266	1009.78	1	Z-025183	LOC108352910	gene		D:\assemblies\Rattus_norvegicus-Rnor_6.0-dbSNP149\Rattus_norvegicus-Rnor_6.0-dbSNP149.genometemplate\sequences\NC_005114_chr15.gbk#0	111246239	NC_005114.4	-	1126	29993717..29992592	108352910		LOC108352910
LOC690805	0.001	0.016	0.696	0.001	16.4834	16.4834	736.253	1	Z-025184	LOC690805	gene		D:\assemblies\Rattus_norvegicus-Rnor_6.0-dbSNP149\Rattus_norvegicus-Rnor_6.0-dbSNP149.genometemplate\sequences\NC_005114_chr15.gbk#0	111246239	NC_005114.4	-	1618	30012216..30010599	690805		LOC690805
LOC100360925	0.001	0.001	0.235	0.001	1	1	248.155	1	Z-025185	LOC100360925	gene		D:\assemblies\Rattus_norvegicus-Rnor_6.0-dbSNP149\Rattus_norvegicus-Rnor_6.0-dbSNP149.genometemplate\sequences\NC_005114_chr15.gbk#0	111246239	NC_005114.4	-	2090	30019364..30017275	100360925, 2321134		LOC100360925
LOC103690667	0.001	0.011	1.278	0.001	11.7113	11.7113	1352.67	1	Z-025189	LOC103690667	gene		D:\assemblies\Rattus_norvegicus-Rnor_6.0-dbSNP149\Rattus_norvegicus-Rnor_6.0-dbSNP149.genometemplate\sequences\NC_005114_chr15.gbk#0	111246239	NC_005114.4	-	718	30147862..30147145	103690667, 9332694		LOC103690667
LOC688340	0.001	0.001	2.95	0.001	1	1	3121.3	1	Z-025190	LOC688340	gene		D:\assemblies\Rattus_norvegicus-Rnor_6.0-dbSNP149\Rattus_norvegicus-Rnor_6.0-dbSNP149.genometemplate\sequences\NC_005114_chr15.gbk#0	111246239	NC_005114.4	-	24398	30197379..30172982	688340		LOC688340
LOC100361487	0.001	0.001	0.277	0.001	1	1	293.236	1	Z-025196	LOC100361487	gene		D:\assemblies\Rattus_norvegicus-Rnor_6.0-dbSNP149\Rattus_norvegicus-Rnor_6.0-dbSNP149.genometemplate\sequences\NC_005114_chr15.gbk#0	111246239	NC_005114.4	-	5070	30324129..30319060	100361487, 2320078		LOC100361487
LOC100360554	0.001	0.001	4.16	0.001	1	1	4401.56	1	Z-025197	LOC100360554	gene		D:\assemblies\Rattus_norvegicus-Rnor_6.0-dbSNP149\Rattus_norvegicus-Rnor_6.0-dbSNP149.genometemplate\sequences\NC_005114_chr15.gbk#0	111246239	NC_005114.4	-	8910	30344366..30335457	100360554, 2321903		LOC100360554
LOC102553366	0.001	0.03	0.178	0.001	31.4059	31.4059	188.701	1	Z-025198	LOC102553366	gene		D:\assemblies\Rattus_norvegicus-Rnor_6.0-dbSNP149\Rattus_norvegicus-Rnor_6.0-dbSNP149.genometemplate\sequences\NC_005114_chr15.gbk#0	111246239	NC_005114.4	-	731	30385306..30384576	102553366		LOC102553366
LOC108352993	0.001	0.001	0.602	0.001	1	1	637.227	1	Z-025202	LOC108352993	gene		D:\assemblies\Rattus_norvegicus-Rnor_6.0-dbSNP149\Rattus_norvegicus-Rnor_6.0-dbSNP149.genometemplate\sequences\NC_005114_chr15.gbk#0	111246239	NC_005114.4	+	689	30440657..30441345	108352993		LOC108352993
LOC102552674	0.001	0.001	1.965	0.001	1	1	2078.97	1	Z-025206	LOC102552674	gene		D:\assemblies\Rattus_norvegicus-Rnor_6.0-dbSNP149\Rattus_norvegicus-Rnor_6.0-dbSNP149.genometemplate\sequences\NC_005114_chr15.gbk#0	111246239	NC_005114.4	+	883	30534713..30535595	102552674		LOC102552674
Trav14s1	0.001	0.001	0.139	0.001	1	1	146.668	1	Z-025208	Trav14s1	gene		D:\assemblies\Rattus_norvegicus-Rnor_6.0-dbSNP149\Rattus_norvegicus-Rnor_6.0-dbSNP149.genometemplate\sequences\NC_005114_chr15.gbk#0	111246239	NC_005114.4	+	2200	30552862..30555061	364337		Trav14s1
LOC100360242	0.001	0.012	0.192	0.001	12.5272	12.5272	203.003	1	Z-025209	LOC100360242	gene		D:\assemblies\Rattus_norvegicus-Rnor_6.0-dbSNP149\Rattus_norvegicus-Rnor_6.0-dbSNP149.genometemplate\sequences\NC_005114_chr15.gbk#0	111246239	NC_005114.4	+	7713	30557185..30564897	100360242, 2322508		LOC100360242
LOC102552254	0.001	0.001	0.589	0.001	1	1	623.634	1	Z-025211	LOC102552254	gene		D:\assemblies\Rattus_norvegicus-Rnor_6.0-dbSNP149\Rattus_norvegicus-Rnor_6.0-dbSNP149.genometemplate\sequences\NC_005114_chr15.gbk#0	111246239	NC_005114.4	+	3925	30576425..30580349	102552254		LOC102552254
LOC103693845	0.001	0.001	0.488	0.001	1	1	516.716	1	Z-025217	LOC103693845	gene		D:\assemblies\Rattus_norvegicus-Rnor_6.0-dbSNP149\Rattus_norvegicus-Rnor_6.0-dbSNP149.genometemplate\sequences\NC_005114_chr15.gbk#0	111246239	NC_005114.4	+	1170	30776420..30777589	103693845		LOC103693845
LOC690809	0.001	0.005	0.954	0.001	5.39266	5.39266	1009.78	1	Z-025221	LOC690809	gene		D:\assemblies\Rattus_norvegicus-Rnor_6.0-dbSNP149\Rattus_norvegicus-Rnor_6.0-dbSNP149.genometemplate\sequences\NC_005114_chr15.gbk#0	111246239	NC_005114.4	+	1659	30801748..30803406	690809		LOC690809
LOC100360460	0.001	0.001	0.748	0.001	1	1	791.579	1	Z-025223	LOC100360460	gene		D:\assemblies\Rattus_norvegicus-Rnor_6.0-dbSNP149\Rattus_norvegicus-Rnor_6.0-dbSNP149.genometemplate\sequences\NC_005114_chr15.gbk#0	111246239	NC_005114.4	+	33084	30820360..30853443	100360460, 2322096		LOC100360460
LOC102547812	0.001	0.001	0.303	0.001	1	1	320.84	1	Z-025224	LOC102547812	gene		D:\assemblies\Rattus_norvegicus-Rnor_6.0-dbSNP149\Rattus_norvegicus-Rnor_6.0-dbSNP149.genometemplate\sequences\NC_005114_chr15.gbk#0	111246239	NC_005114.4	+	2222	30826145..30828366	102547812		LOC102547812
LOC102551082	0.001	0.001	0.258	0.001	1	1	272.621	1	Z-025226	LOC102551082	gene		D:\assemblies\Rattus_norvegicus-Rnor_6.0-dbSNP149\Rattus_norvegicus-Rnor_6.0-dbSNP149.genometemplate\sequences\NC_005114_chr15.gbk#0	111246239	NC_005114.4	+	668	30862370..30863037	102551082, 11051997		LOC102551082
LOC108352913	0.001	0.001	0.505	0.001	1	1	534.188	1	Z-025227	LOC108352913	gene		D:\assemblies\Rattus_norvegicus-Rnor_6.0-dbSNP149\Rattus_norvegicus-Rnor_6.0-dbSNP149.genometemplate\sequences\NC_005114_chr15.gbk#0	111246239	NC_005114.4	+	6766	30870972..30877737	108352913		LOC108352913
LOC108352995	0.001	0.001	4.067	0.001	1	1	4303.61	1	Z-025230	LOC108352995	gene		D:\assemblies\Rattus_norvegicus-Rnor_6.0-dbSNP149\Rattus_norvegicus-Rnor_6.0-dbSNP149.genometemplate\sequences\NC_005114_chr15.gbk#0	111246239	NC_005114.4	+	617	30909988..30910604	108352995		LOC108352995
LOC108352919	0.001	0.001	2.492	0.001	1	1	2636.31	1	Z-025237	LOC108352919	gene		D:\assemblies\Rattus_norvegicus-Rnor_6.0-dbSNP149\Rattus_norvegicus-Rnor_6.0-dbSNP149.genometemplate\sequences\NC_005114_chr15.gbk#0	111246239	NC_005114.4	+	901	31104608..31105508	108352919		LOC108352919
LOC108349428	0.406	1.281	23.711	0.477	3.1524	2.68479	49.7001	0.851666	Z-025238	LOC108349428	gene		D:\assemblies\Rattus_norvegicus-Rnor_6.0-dbSNP149\Rattus_norvegicus-Rnor_6.0-dbSNP149.genometemplate\sequences\NC_005114_chr15.gbk#0	111246239	NC_005114.4	+	1917	31119417..31121333	108349428		LOC108349428
LOC100360696	0.001	0.001	3.61	0.001	1	1	3819.53	1	Z-025239	LOC100360696	gene		D:\assemblies\Rattus_norvegicus-Rnor_6.0-dbSNP149\Rattus_norvegicus-Rnor_6.0-dbSNP149.genometemplate\sequences\NC_005114_chr15.gbk#0	111246239	NC_005114.4	+	1331	31140892..31142222	100360696, 2321661		LOC100360696
LOC103693846	0.001	0.005	0.266	0.001	5.39755	5.39755	281.028	1	Z-025244	LOC103693846	gene		D:\assemblies\Rattus_norvegicus-Rnor_6.0-dbSNP149\Rattus_norvegicus-Rnor_6.0-dbSNP149.genometemplate\sequences\NC_005114_chr15.gbk#0	111246239	NC_005114.4	+	1929	31288711..31290639	103693846		LOC103693846
LOC103693847	0.001	0.005	0.266	0.001	5.39755	5.39755	281.028	1	Z-025245	LOC103693847	gene		D:\assemblies\Rattus_norvegicus-Rnor_6.0-dbSNP149\Rattus_norvegicus-Rnor_6.0-dbSNP149.genometemplate\sequences\NC_005114_chr15.gbk#0	111246239	NC_005114.4	+	732	31290858..31291589	103693847		LOC103693847
LOC102554268	0.001	0.012	0.273	0.001	12.9452	12.9452	289.207	1	Z-025246	LOC102554268	gene		D:\assemblies\Rattus_norvegicus-Rnor_6.0-dbSNP149\Rattus_norvegicus-Rnor_6.0-dbSNP149.genometemplate\sequences\NC_005114_chr15.gbk#0	111246239	NC_005114.4	+	1128	31308380..31309507	102554268		LOC102554268
RGD1565296	0.001	0.001	0.235	0.001	1	1	248.155	1	Z-025255	RGD1565296	gene		D:\assemblies\Rattus_norvegicus-Rnor_6.0-dbSNP149\Rattus_norvegicus-Rnor_6.0-dbSNP149.genometemplate\sequences\NC_005114_chr15.gbk#0	111246239	NC_005114.4	+	1869	31416873..31418741	290108, 1565296		RGD1565296
LOC364335	0.001	0.001	0.284	0.001	1	1	300.308	1	Z-025257	LOC364335	gene		D:\assemblies\Rattus_norvegicus-Rnor_6.0-dbSNP149\Rattus_norvegicus-Rnor_6.0-dbSNP149.genometemplate\sequences\NC_005114_chr15.gbk#0	111246239	NC_005114.4	+	519	31446983..31447501	364335		LOC364335
LOC682708	0.001	0.001	2.044	0.001	1	1	2162.94	1	Z-025260	LOC682708	gene		D:\assemblies\Rattus_norvegicus-Rnor_6.0-dbSNP149\Rattus_norvegicus-Rnor_6.0-dbSNP149.genometemplate\sequences\NC_005114_chr15.gbk#0	111246239	NC_005114.4	+	1596	31510701..31512296	682708		LOC682708
LOC685051	0.001	0.001	1.181	0.001	1	1	1249.33	1	Z-025261	LOC685051	gene		D:\assemblies\Rattus_norvegicus-Rnor_6.0-dbSNP149\Rattus_norvegicus-Rnor_6.0-dbSNP149.genometemplate\sequences\NC_005114_chr15.gbk#0	111246239	NC_005114.4	+	1951	31532775..31534725	685051		LOC685051
LOC103690776	0.001	0.007	0.273	0.001	7.13386	7.13386	288.724	1	Z-025269	LOC103690776	gene		D:\assemblies\Rattus_norvegicus-Rnor_6.0-dbSNP149\Rattus_norvegicus-Rnor_6.0-dbSNP149.genometemplate\sequences\NC_005114_chr15.gbk#0	111246239	NC_005114.4	+	748	31644534..31645281	103690776		LOC103690776
LOC108353021	0.001	0.049	1.147	0.001	51.9499	51.9499	1214.1	1	Z-025270	LOC108353021	gene		D:\assemblies\Rattus_norvegicus-Rnor_6.0-dbSNP149\Rattus_norvegicus-Rnor_6.0-dbSNP149.genometemplate\sequences\NC_005114_chr15.gbk#0	111246239	NC_005114.4	+	1975	31651888..31653862	108353021		LOC108353021
LOC108353022	0.001	0.005	1.693	0.001	4.97617	4.97617	1791.27	1	Z-025275	LOC108353022	gene		D:\assemblies\Rattus_norvegicus-Rnor_6.0-dbSNP149\Rattus_norvegicus-Rnor_6.0-dbSNP149.genometemplate\sequences\NC_005114_chr15.gbk#0	111246239	NC_005114.4	+	1271	31812029..31813299	108353022		LOC108353022
LOC102556189	0.001	0.001	0.091	0.001	1	1	96.648	1	Z-025278	LOC102556189	gene		D:\assemblies\Rattus_norvegicus-Rnor_6.0-dbSNP149\Rattus_norvegicus-Rnor_6.0-dbSNP149.genometemplate\sequences\NC_005114_chr15.gbk#0	111246239	NC_005114.4	+	14803	31867634..31882436	102556189		LOC102556189
LOC102556014	0.001	0.001	0.408	0.001	1	1	432.082	1	Z-025281	LOC102556014	gene		D:\assemblies\Rattus_norvegicus-Rnor_6.0-dbSNP149\Rattus_norvegicus-Rnor_6.0-dbSNP149.genometemplate\sequences\NC_005114_chr15.gbk#0	111246239	NC_005114.4	+	1447	31947229..31948675	102556014		LOC102556014
LOC108353023	0.004	0.067	8.583	0.001	16.4933	70.5963	9080.83	4.28029	Z-025286	LOC108353023	gene		D:\assemblies\Rattus_norvegicus-Rnor_6.0-dbSNP149\Rattus_norvegicus-Rnor_6.0-dbSNP149.genometemplate\sequences\NC_005114_chr15.gbk#0	111246239	NC_005114.4	+	4603	32020659..32025261	108353023		LOC108353023
LOC102555836	0.001	0.001	7.288	0.001	1	1	7711.33	1	Z-025287	LOC102555836	gene		D:\assemblies\Rattus_norvegicus-Rnor_6.0-dbSNP149\Rattus_norvegicus-Rnor_6.0-dbSNP149.genometemplate\sequences\NC_005114_chr15.gbk#0	111246239	NC_005114.4	+	1675	32035090..32036764	102555836		LOC102555836
LOC102556508	0.001	0.001	1.467	0.001	1	1	1552.13	1	Z-025293	LOC102556508	gene		D:\assemblies\Rattus_norvegicus-Rnor_6.0-dbSNP149\Rattus_norvegicus-Rnor_6.0-dbSNP149.genometemplate\sequences\NC_005114_chr15.gbk#0	111246239	NC_005114.4	+	1204	32136211..32137414	102556508		LOC102556508
LOC100911980	0.001	0.001	0.203	0.001	1	1	214.464	1	Z-025294	LOC100911980	gene		D:\assemblies\Rattus_norvegicus-Rnor_6.0-dbSNP149\Rattus_norvegicus-Rnor_6.0-dbSNP149.genometemplate\sequences\NC_005114_chr15.gbk#0	111246239	NC_005114.4	+	1174	32146865..32148038	100911980, 6489577		LOC100911980
LOC100362167	0.001	0.001	0.258	0.001	1	1	272.621	1	Z-025296	LOC100362167	gene		D:\assemblies\Rattus_norvegicus-Rnor_6.0-dbSNP149\Rattus_norvegicus-Rnor_6.0-dbSNP149.genometemplate\sequences\NC_005114_chr15.gbk#0	111246239	NC_005114.4	+	670	32296009..32296678	100362167, 2318716		LOC100362167
LOC108353000	0.001	0.001	0.83	0.001	1	1	878.318	1	Z-025298	LOC108353000	gene		D:\assemblies\Rattus_norvegicus-Rnor_6.0-dbSNP149\Rattus_norvegicus-Rnor_6.0-dbSNP149.genometemplate\sequences\NC_005114_chr15.gbk#0	111246239	NC_005114.4	+	1206	32309865..32311070	108353000		LOC108353000
LOC103693850	0.001	0.007	0.273	0.001	7.13386	7.13386	288.724	1	Z-025300	LOC103693850	gene		D:\assemblies\Rattus_norvegicus-Rnor_6.0-dbSNP149\Rattus_norvegicus-Rnor_6.0-dbSNP149.genometemplate\sequences\NC_005114_chr15.gbk#0	111246239	NC_005114.4	+	748	32355494..32356241	103693850		LOC103693850
LOC103693545	0.001	0.001	0.327	0.001	1	1	345.484	1	Z-025306	LOC103693545	gene		D:\assemblies\Rattus_norvegicus-Rnor_6.0-dbSNP149\Rattus_norvegicus-Rnor_6.0-dbSNP149.genometemplate\sequences\NC_005114_chr15.gbk#0	111246239	NC_005114.4	+	1487	32487390..32488876	103693545		LOC103693545
LOC108353024	0.023	0.386	0.001	0.185	16.4231	2.08489	0.00510866	0.126949	Z-025312	LOC108353024	gene		D:\assemblies\Rattus_norvegicus-Rnor_6.0-dbSNP149\Rattus_norvegicus-Rnor_6.0-dbSNP149.genometemplate\sequences\NC_005114_chr15.gbk#0	111246239	NC_005114.4	-	11285	32699124..32687840	108353024		LOC108353024
LOC100362843	0.001	0.001	1.443	0.001	1	1	1526.8	1	Z-025315	LOC100362843	gene		D:\assemblies\Rattus_norvegicus-Rnor_6.0-dbSNP149\Rattus_norvegicus-Rnor_6.0-dbSNP149.genometemplate\sequences\NC_005114_chr15.gbk#0	111246239	NC_005114.4	+	14764	32762979..32777742	100362843, 2323935		LOC100362843
Ap1g2	1.618	0.853	45.609	1.858	0.526862	0.458719	24.5413	0.870663	Z-025361	Ap1g2	gene		D:\assemblies\Rattus_norvegicus-Rnor_6.0-dbSNP149\Rattus_norvegicus-Rnor_6.0-dbSNP149.genometemplate\sequences\NC_005114_chr15.gbk#0	111246239	NC_005114.4	-	7910	33767017..33759108	100362547, 2324507		Ap1g2
Ctsg	29.556	75.571	0.001	31.687	2.5569	2.3849	2.98268e-05	0.932731	Z-025420	Ctsg	gene		D:\assemblies\Rattus_norvegicus-Rnor_6.0-dbSNP149\Rattus_norvegicus-Rnor_6.0-dbSNP149.genometemplate\sequences\NC_005114_chr15.gbk#0	111246239	NC_005114.4	-	6346	35113678..35107333	290257, 1307681		Ctsg
LOC108348241	0.001	0.001	1.048	0.001	1	1	1108.83	1	Z-025482	LOC108348241	gene		D:\assemblies\Rattus_norvegicus-Rnor_6.0-dbSNP149\Rattus_norvegicus-Rnor_6.0-dbSNP149.genometemplate\sequences\NC_005114_chr15.gbk#0	111246239	NC_005114.4	-	4082	38651853..38647772	108348241		LOC108348241
LOC108352929	1.647	3.325	23.801	2.127	2.01854	1.56328	11.1897	0.77446	Z-025493	LOC108352929	gene		D:\assemblies\Rattus_norvegicus-Rnor_6.0-dbSNP149\Rattus_norvegicus-Rnor_6.0-dbSNP149.genometemplate\sequences\NC_005114_chr15.gbk#0	111246239	NC_005114.4	-	4763	39667702..39662940	108352929		LOC108352929
C1qtnf9	0.001	0.001	0.2	0.001	1	1	212.095	1	Z-025507	C1qtnf9	gene		D:\assemblies\Rattus_norvegicus-Rnor_6.0-dbSNP149\Rattus_norvegicus-Rnor_6.0-dbSNP149.genometemplate\sequences\NC_005114_chr15.gbk#0	111246239	NC_005114.4	+	11383	41069579..41080961	364395, 1560876		C1qtnf9	RGD1560876
Tnfrsf19	0.094	0.068	0.001	0.627	0.71915	0.107911	0.00150619	0.150053	Z-025509	Tnfrsf19	gene		D:\assemblies\Rattus_norvegicus-Rnor_6.0-dbSNP149\Rattus_norvegicus-Rnor_6.0-dbSNP149.genometemplate\sequences\NC_005114_chr15.gbk#0	111246239	NC_005114.4	-	66384	41316203..41249820	290300, 1564996		Tnfrsf19	RGD1564996
Clu	7.025	8.18	303.66	6.791	1.16448	1.20461	44.7158	1.03446	Z-025529	Clu	gene		D:\assemblies\Rattus_norvegicus-Rnor_6.0-dbSNP149\Rattus_norvegicus-Rnor_6.0-dbSNP149.genometemplate\sequences\NC_005114_chr15.gbk#0	111246239	NC_005114.4	+	39247	42626612..42665858	24854, 3907		Clu	APOJ, CLI, DAG, RATTRPM2B, SGP-2, SGP2, SP-40, SP40, TRPM-2, Trpm2, TRPM2B, Trpmb
Gulo	0.001	0.001	0.109	0.001	1	1	115.753	1	Z-025530	Gulo	gene		D:\assemblies\Rattus_norvegicus-Rnor_6.0-dbSNP149\Rattus_norvegicus-Rnor_6.0-dbSNP149.genometemplate\sequences\NC_005114_chr15.gbk#0	111246239	NC_005114.4	-	22506	42693711..42671206	60671, 620701		Gulo
Chrna2	0.001	0.035	0.248	0.001	37.3903	37.3903	262.762	1	Z-025534	Chrna2	gene		D:\assemblies\Rattus_norvegicus-Rnor_6.0-dbSNP149\Rattus_norvegicus-Rnor_6.0-dbSNP149.genometemplate\sequences\NC_005114_chr15.gbk#0	111246239	NC_005114.4	+	16283	42808897..42825179	170945, 621533		Chrna2	ACHR
LOC103693653	0.001	0.001	0.221	0.001	1	1	233.961	1	Z-025551	LOC103693653	gene		D:\assemblies\Rattus_norvegicus-Rnor_6.0-dbSNP149\Rattus_norvegicus-Rnor_6.0-dbSNP149.genometemplate\sequences\NC_005114_chr15.gbk#0	111246239	NC_005114.4	-	2226	44444512..44442287	103693653, 9098115		LOC103693653
Gnrh1	0.001	0.001	0.876	0.001	1	1	926.339	1	Z-025552	Gnrh1	gene		D:\assemblies\Rattus_norvegicus-Rnor_6.0-dbSNP149\Rattus_norvegicus-Rnor_6.0-dbSNP149.genometemplate\sequences\NC_005114_chr15.gbk#0	111246239	NC_005114.4	+	4209	44441856..44446064	25194, 2720		Gnrh1	Gnrh, Gnrha, Lhrh, Rgnrhg1
Gucy1b2	0.001	0.001	0.055	0.001	1	1	58.5583	1	Z-025564	Gucy1b2	gene		D:\assemblies\Rattus_norvegicus-Rnor_6.0-dbSNP149\Rattus_norvegicus-Rnor_6.0-dbSNP149.genometemplate\sequences\NC_005114_chr15.gbk#0	111246239	NC_005114.4	-	70624	45550285..45479662	25206, 2770		Gucy1b2	Gucy1b2a, Gucy1b2b, SGC
Gata4	0.001	0.001	0.355	0.001	1	1	375.966	1	Z-025580	Gata4	gene		D:\assemblies\Rattus_norvegicus-Rnor_6.0-dbSNP149\Rattus_norvegicus-Rnor_6.0-dbSNP149.genometemplate\sequences\NC_005114_chr15.gbk#0	111246239	NC_005114.4	-	71977	46458679..46386703	54254, 2665		Gata4
LOC108352941	0.001	0.019	0.043	0.001	20.2249	20.2249	45.659	1	Z-025618	LOC108352941	gene		D:\assemblies\Rattus_norvegicus-Rnor_6.0-dbSNP149\Rattus_norvegicus-Rnor_6.0-dbSNP149.genometemplate\sequences\NC_005114_chr15.gbk#0	111246239	NC_005114.4	-	10133	49168967..49158835	108352941		LOC108352941
Slc25a37	34.386	49.307	0.818	44.509	1.43392	1.10778	0.0183858	0.772557	Z-025628	Slc25a37	gene		D:\assemblies\Rattus_norvegicus-Rnor_6.0-dbSNP149\Rattus_norvegicus-Rnor_6.0-dbSNP149.genometemplate\sequences\NC_005114_chr15.gbk#0	111246239	NC_005114.4	-	42621	51168384..51125764	306000, 1359361		Slc25a37	Mscp, RGD1359361
Dmtn	10.774	26.68	0.421	13.807	2.47629	1.93241	0.0304666	0.780363	Z-025662	Dmtn	gene		D:\assemblies\Rattus_norvegicus-Rnor_6.0-dbSNP149\Rattus_norvegicus-Rnor_6.0-dbSNP149.genometemplate\sequences\NC_005114_chr15.gbk#0	111246239	NC_005114.4	-	27624	52320385..52292762	361069, 1311419		Dmtn	Epb4.9, Epb49
LOC102546539	0.005	0.005	0.024	0.001	0.963331	5.56421	25.4682	5.776	Z-025694	LOC102546539	gene		D:\assemblies\Rattus_norvegicus-Rnor_6.0-dbSNP149\Rattus_norvegicus-Rnor_6.0-dbSNP149.genometemplate\sequences\NC_005114_chr15.gbk#0	111246239	NC_005114.4	-	26117	56566090..56539974	102546539, 7599070		LOC102546539
Olfm4	4.89	13.54	0.001	4.823	2.76884	2.80737	0.000195969	1.01391	Z-025758	Olfm4	gene		D:\assemblies\Rattus_norvegicus-Rnor_6.0-dbSNP149\Rattus_norvegicus-Rnor_6.0-dbSNP149.genometemplate\sequences\NC_005114_chr15.gbk#0	111246239	NC_005114.4	+	45188	62384263..62429450	290409, 1311708		Olfm4
LOC108352959	0.005	0.036	0.687	0.001	7.69563	38.0504	726.439	4.94441	Z-025818	LOC108352959	gene		D:\assemblies\Rattus_norvegicus-Rnor_6.0-dbSNP149\Rattus_norvegicus-Rnor_6.0-dbSNP149.genometemplate\sequences\NC_005114_chr15.gbk#0	111246239	NC_005114.4	+	7685	87553455..87561139	108352959		LOC108352959
Slain1	0.001	0.006	1.208	0.001	6.53337	6.53337	1278.36	1	Z-025823	Slain1	gene		D:\assemblies\Rattus_norvegicus-Rnor_6.0-dbSNP149\Rattus_norvegicus-Rnor_6.0-dbSNP149.genometemplate\sequences\NC_005114_chr15.gbk#0	111246239	NC_005114.4	+	43641	87862832..87906472	361087, 1308626		Slain1	RGD1308626
LOC103693772	0.311	1.164	0.001	0.232	3.74365	5.01156	0.00406908	1.33868	Z-025852	LOC103693772	gene		D:\assemblies\Rattus_norvegicus-Rnor_6.0-dbSNP149\Rattus_norvegicus-Rnor_6.0-dbSNP149.genometemplate\sequences\NC_005114_chr15.gbk#0	111246239	NC_005114.4	+	54666	95230207..95284872	103693772, 9388800		LOC103693772
Dnajc3	2.434	2.031	34.584	1.941	0.834412	1.04617	17.8181	1.25378	Z-025900	Dnajc3	gene		D:\assemblies\Rattus_norvegicus-Rnor_6.0-dbSNP149\Rattus_norvegicus-Rnor_6.0-dbSNP149.genometemplate\sequences\NC_005114_chr15.gbk#0	111246239	NC_005114.4	+	39319	104186918..104226236	63880, 708518		Dnajc3
LOC108352981	0.001	0.033	0.001	0.066	34.9139	0.498917	0.0142899	0.0142899	Z-025916	LOC108352981	gene		D:\assemblies\Rattus_norvegicus-Rnor_6.0-dbSNP149\Rattus_norvegicus-Rnor_6.0-dbSNP149.genometemplate\sequences\NC_005114_chr15.gbk#0	111246239	NC_005114.4	+	18471	106064405..106082875	108352981		LOC108352981
Timm8a2	0.001	0.001	0.743	0.001	1	1	785.73	1	Z-025930	Timm8a2	gene		D:\assemblies\Rattus_norvegicus-Rnor_6.0-dbSNP149\Rattus_norvegicus-Rnor_6.0-dbSNP149.genometemplate\sequences\NC_005114_chr15.gbk#0	111246239	NC_005114.4	+	8484	108448351..108456834	680794, 1588172		Timm8a2
Rps24	628.101	1683.57	7798.51	793.58	2.68042	2.12149	9.82701	0.791477	Z-025950	Rps24	gene		D:\assemblies\Rattus_norvegicus-Rnor_6.0-dbSNP149\Rattus_norvegicus-Rnor_6.0-dbSNP149.genometemplate\sequences\NC_005115_chr16.gbk#0	90668790	NC_005115.4	+	4702	757390..762091	81776, 621040		Rps24	L33
LOC108353065	0.001	0.011	0.017	0.001	11.999	11.999	18.1409	1	Z-025959	LOC108353065	gene		D:\assemblies\Rattus_norvegicus-Rnor_6.0-dbSNP149\Rattus_norvegicus-Rnor_6.0-dbSNP149.genometemplate\sequences\NC_005115_chr16.gbk#0	90668790	NC_005115.4	-	8831	1558969..1550139	108353065		LOC108353065
LOC102548056	0.001	0.001	0.712	0.001	1	1	752.918	1	Z-025980	LOC102548056	gene		D:\assemblies\Rattus_norvegicus-Rnor_6.0-dbSNP149\Rattus_norvegicus-Rnor_6.0-dbSNP149.genometemplate\sequences\NC_005115_chr16.gbk#0	90668790	NC_005115.4	-	1625	2744017..2742393	102548056, 7556606		LOC102548056
LOC108353071	0.004	0.003	0.338	0.001	0.85636	3.48268	357.451	4.06684	Z-026050	LOC108353071	gene		D:\assemblies\Rattus_norvegicus-Rnor_6.0-dbSNP149\Rattus_norvegicus-Rnor_6.0-dbSNP149.genometemplate\sequences\NC_005115_chr16.gbk#0	90668790	NC_005115.4	+	8240	7675614..7683853	108353071		LOC108353071
Wdfy4	0.573	0.551	6.069	0.583	0.960788	0.944546	10.4075	0.983095	Z-026080	Wdfy4	gene		D:\assemblies\Rattus_norvegicus-Rnor_6.0-dbSNP149\Rattus_norvegicus-Rnor_6.0-dbSNP149.genometemplate\sequences\NC_005115_chr16.gbk#0	90668790	NC_005115.4	-	236319	9430764..9194446	498582, 1564142		Wdfy4
LOC108353079	0.054	1.046	0.001	0.156	19.1991	6.71757	0.00607133	0.349889	Z-026114	LOC108353079	gene		D:\assemblies\Rattus_norvegicus-Rnor_6.0-dbSNP149\Rattus_norvegicus-Rnor_6.0-dbSNP149.genometemplate\sequences\NC_005115_chr16.gbk#0	90668790	NC_005115.4	+	551097	12099469..12650565	108353079		LOC108353079
F2rl3	0.8	3.462	0.001	1.636	4.32584	2.11622	0.000577695	0.489203	Z-026180	F2rl3	gene		D:\assemblies\Rattus_norvegicus-Rnor_6.0-dbSNP149\Rattus_norvegicus-Rnor_6.0-dbSNP149.genometemplate\sequences\NC_005115_chr16.gbk#0	90668790	NC_005115.4	-	1994	18819790..18817797	116498, 620872		F2rl3	PAR4
LOC103693914	0.011	0.001	2.735	0.001	0.0830418	1	2893.59	12.0421	Z-026189	LOC103693914	gene		D:\assemblies\Rattus_norvegicus-Rnor_6.0-dbSNP149\Rattus_norvegicus-Rnor_6.0-dbSNP149.genometemplate\sequences\NC_005115_chr16.gbk#0	90668790	NC_005115.4	-	850	19068916..19068067	103693914, 9252289		LOC103693914
Cib3	0.001	0.001	0.774	0.001	1	1	819.165	1	Z-026197	Cib3	gene		D:\assemblies\Rattus_norvegicus-Rnor_6.0-dbSNP149\Rattus_norvegicus-Rnor_6.0-dbSNP149.genometemplate\sequences\NC_005115_chr16.gbk#0	90668790	NC_005115.4	+	9315	19323516..19332830	685723, 1590245		Cib3
Fcho1	2.239	5.623	49.282	2.819	2.51079	1.99431	17.4797	0.794299	Z-026238	Fcho1	gene		D:\assemblies\Rattus_norvegicus-Rnor_6.0-dbSNP149\Rattus_norvegicus-Rnor_6.0-dbSNP149.genometemplate\sequences\NC_005115_chr16.gbk#0	90668790	NC_005115.4	-	17337	20153344..20136008	290639, 1307683		Fcho1
Mef2b	0.007	0.007	7.915	0.001	0.995633	7.81543	8374.54	7.84971	Z-026288	Mef2b	gene		D:\assemblies\Rattus_norvegicus-Rnor_6.0-dbSNP149\Rattus_norvegicus-Rnor_6.0-dbSNP149.genometemplate\sequences\NC_005115_chr16.gbk#0	90668790	NC_005115.4	-	16448	21017651..21001204	498607, 1561733		Mef2b
Yjefn3	0.001	0.006	0.221	0.001	6.04291	6.04291	233.496	1	Z-026300	Yjefn3	gene		D:\assemblies\Rattus_norvegicus-Rnor_6.0-dbSNP149\Rattus_norvegicus-Rnor_6.0-dbSNP149.genometemplate\sequences\NC_005115_chr16.gbk#0	90668790	NC_005115.4	+	6302	21282355..21288656	498608, 1563236		Yjefn3
Pbx4	0.007	0.001	0.701	0.001	0.139099	1	741.858	7.18912	Z-026302	Pbx4	gene		D:\assemblies\Rattus_norvegicus-Rnor_6.0-dbSNP149\Rattus_norvegicus-Rnor_6.0-dbSNP149.genometemplate\sequences\NC_005115_chr16.gbk#0	90668790	NC_005115.4	-	35655	21338771..21303117	361131, 1305100		Pbx4	Edg4
LOC102551960	0.001	0.006	0.153	0.001	6.84879	6.84879	161.788	1	Z-026313	LOC102551960	gene		D:\assemblies\Rattus_norvegicus-Rnor_6.0-dbSNP149\Rattus_norvegicus-Rnor_6.0-dbSNP149.genometemplate\sequences\NC_005115_chr16.gbk#0	90668790	NC_005115.4	+	6462	21721123..21727584	102551960, 7723719		LOC102551960
LOC102557578	0.001	0.006	0.001	0.243	6.72004	0.0261255	0.0038877	0.0038877	Z-026325	LOC102557578	gene		D:\assemblies\Rattus_norvegicus-Rnor_6.0-dbSNP149\Rattus_norvegicus-Rnor_6.0-dbSNP149.genometemplate\sequences\NC_005115_chr16.gbk#0	90668790	NC_005115.4	+	8001	22350386..22358386	102557578, 7608857		LOC102557578
Sh2d4a	1.988	0.244	0.104	2.552	0.12288	0.0957197	0.0408416	0.778966	Z-026330	Sh2d4a	gene		D:\assemblies\Rattus_norvegicus-Rnor_6.0-dbSNP149\Rattus_norvegicus-Rnor_6.0-dbSNP149.genometemplate\sequences\NC_005115_chr16.gbk#0	90668790	NC_005115.4	-	72579	23156825..23084247	306376, 1307991		Sh2d4a
LOC100910404	0.005	0.001	0.44	0.001	0.175811	1	465.609	5.68792	Z-026346	LOC100910404	gene		D:\assemblies\Rattus_norvegicus-Rnor_6.0-dbSNP149\Rattus_norvegicus-Rnor_6.0-dbSNP149.genometemplate\sequences\NC_005115_chr16.gbk#0	90668790	NC_005115.4	+	35727	26483411..26519137	100910404, 6498547		LOC100910404
LOC103693936	0.871	1.563	0.001	1.255	1.79386	1.24533	0.000753026	0.69422	Z-026369	LOC103693936	gene		D:\assemblies\Rattus_norvegicus-Rnor_6.0-dbSNP149\Rattus_norvegicus-Rnor_6.0-dbSNP149.genometemplate\sequences\NC_005115_chr16.gbk#0	90668790	NC_005115.4	+	210173	31552596..31762768	103693936, 9212281		LOC103693936
LOC103693946	0.001	0.005	0.276	0.001	5.16335	5.16335	291.679	1	Z-026395	LOC103693946	gene		D:\assemblies\Rattus_norvegicus-Rnor_6.0-dbSNP149\Rattus_norvegicus-Rnor_6.0-dbSNP149.genometemplate\sequences\NC_005115_chr16.gbk#0	90668790	NC_005115.4	+	2290	36295743..36298032	103693946, 9269843		LOC103693946
LOC102551022	0.305	1.078	0.001	0.675	3.53228	1.59641	0.00139928	0.451949	Z-026426	LOC102551022	gene		D:\assemblies\Rattus_norvegicus-Rnor_6.0-dbSNP149\Rattus_norvegicus-Rnor_6.0-dbSNP149.genometemplate\sequences\NC_005115_chr16.gbk#0	90668790	NC_005115.4	-	8921	47316220..47307300	102551022, 7540575		LOC102551022
Stox2	0.184	0.007	0.001	0.556	0.039853	0.0131598	0.00169993	0.330207	Z-026438	Stox2	gene		D:\assemblies\Rattus_norvegicus-Rnor_6.0-dbSNP149\Rattus_norvegicus-Rnor_6.0-dbSNP149.genometemplate\sequences\NC_005115_chr16.gbk#0	90668790	NC_005115.4	+	239034	47994555..48233588	306459, 708477		Stox2
Ppp1r3b	0.798	2.743	0.001	1.56	3.43871	1.7588	0.000605912	0.51147	Z-026529	Ppp1r3b	gene		D:\assemblies\Rattus_norvegicus-Rnor_6.0-dbSNP149\Rattus_norvegicus-Rnor_6.0-dbSNP149.genometemplate\sequences\NC_005115_chr16.gbk#0	90668790	NC_005115.4	-	12307	60427498..60415192	192280, 621600		Ppp1r3b
LOC108348413	0.343	0.01	0.001	0.522	0.0305534	0.0200909	0.0018123	0.657567	Z-026604	LOC108348413	gene		D:\assemblies\Rattus_norvegicus-Rnor_6.0-dbSNP149\Rattus_norvegicus-Rnor_6.0-dbSNP149.genometemplate\sequences\NC_005115_chr16.gbk#0	90668790	NC_005115.4	+	15148	70458361..70473508	108348413		LOC108348413
Kcnu1	0.004	0.038	0.057	0.001	9.27442	40.0355	60.5553	4.31676	Z-026612	Kcnu1	gene		D:\assemblies\Rattus_norvegicus-Rnor_6.0-dbSNP149\Rattus_norvegicus-Rnor_6.0-dbSNP149.genometemplate\sequences\NC_005115_chr16.gbk#0	90668790	NC_005115.4	-	84769	70998593..70913825	680912, 1585877		Kcnu1
Star	0.001	0.007	0.177	0.001	7.19179	7.19179	187.333	1	Z-026614	Star	gene		D:\assemblies\Rattus_norvegicus-Rnor_6.0-dbSNP149\Rattus_norvegicus-Rnor_6.0-dbSNP149.genometemplate\sequences\NC_005115_chr16.gbk#0	90668790	NC_005115.4	-	4644	71040847..71036204	25557, 3770		Star
Adam32	0.004	0.007	0.133	0.001	1.58708	6.99482	140.549	4.40736	Z-026628	Adam32	gene		D:\assemblies\Rattus_norvegicus-Rnor_6.0-dbSNP149\Rattus_norvegicus-Rnor_6.0-dbSNP149.genometemplate\sequences\NC_005115_chr16.gbk#0	90668790	NC_005115.4	+	110117	71889035..71999151	361170, 735114		Adam32
Ido1	0.001	0.001	0.649	0.001	1	1	686.944	1	Z-026632	Ido1	gene		D:\assemblies\Rattus_norvegicus-Rnor_6.0-dbSNP149\Rattus_norvegicus-Rnor_6.0-dbSNP149.genometemplate\sequences\NC_005115_chr16.gbk#0	90668790	NC_005115.4	+	11773	72216326..72228098	66029, 619989		Ido1	Ido, Indo
Ank1	10.508	11.719	0.035	12.777	1.11529	0.917178	0.00276527	0.822365	Z-026648	Ank1	gene		D:\assemblies\Rattus_norvegicus-Rnor_6.0-dbSNP149\Rattus_norvegicus-Rnor_6.0-dbSNP149.genometemplate\sequences\NC_005115_chr16.gbk#0	90668790	NC_005115.4	-	231184	73912605..73681422	306570, 1309620		Ank1
LOC102556951	0.007	0.065	0.681	0.001	8.7165	68.5005	720.739	7.85872	Z-026653	LOC102556951	gene		D:\assemblies\Rattus_norvegicus-Rnor_6.0-dbSNP149\Rattus_norvegicus-Rnor_6.0-dbSNP149.genometemplate\sequences\NC_005115_chr16.gbk#0	90668790	NC_005115.4	-	3744	74075115..74071372	102556951, 7665195		LOC102556951
Defb37	0.001	0.001	0.993	0.001	1	1	1051.05	1	Z-026681	Defb37	gene		D:\assemblies\Rattus_norvegicus-Rnor_6.0-dbSNP149\Rattus_norvegicus-Rnor_6.0-dbSNP149.genometemplate\sequences\NC_005115_chr16.gbk#0	90668790	NC_005115.4	+	11791	75083173..75094963	652921, 1560790		Defb37
Defa7	4.979	19.511	0.001	5.739	3.91864	3.39994	0.000164696	0.867632	Z-026696	Defa7	gene		D:\assemblies\Rattus_norvegicus-Rnor_6.0-dbSNP149\Rattus_norvegicus-Rnor_6.0-dbSNP149.genometemplate\sequences\NC_005115_chr16.gbk#0	90668790	NC_005115.4	-	770	75415555..75414786	613222, 1560529		Defa7
Defa11	4.164	24.443	0.001	8.244	5.86963	2.96506	0.000114651	0.505152	Z-026701	Defa11	gene		D:\assemblies\Rattus_norvegicus-Rnor_6.0-dbSNP149\Rattus_norvegicus-Rnor_6.0-dbSNP149.genometemplate\sequences\NC_005115_chr16.gbk#0	90668790	NC_005115.4	-	2185	75519605..75517421	613225, 1587186		Defa11
Defb52	0.001	0.001	75.208	0.001	1	1	79574.7	1	Z-026704	Defb52	gene		D:\assemblies\Rattus_norvegicus-Rnor_6.0-dbSNP149\Rattus_norvegicus-Rnor_6.0-dbSNP149.genometemplate\sequences\NC_005115_chr16.gbk#0	90668790	NC_005115.4	+	2533	75572014..75574546	498660, 1565394		Defb52
LOC102557538	0.016	0.006	2.394	0.001	0.357855	6.00686	2532.55	16.7857	Z-026729	LOC102557538	gene		D:\assemblies\Rattus_norvegicus-Rnor_6.0-dbSNP149\Rattus_norvegicus-Rnor_6.0-dbSNP149.genometemplate\sequences\NC_005115_chr16.gbk#0	90668790	NC_005115.4	+	8579	79732541..79741119	102557538, 7550023		LOC102557538
LOC108348429	0.001	0.007	1.165	0.001	7.28087	7.28087	1232.81	1	Z-026739	LOC108348429	gene		D:\assemblies\Rattus_norvegicus-Rnor_6.0-dbSNP149\Rattus_norvegicus-Rnor_6.0-dbSNP149.genometemplate\sequences\NC_005115_chr16.gbk#0	90668790	NC_005115.4	-	1792	80795174..80793383	108348429		LOC108348429
LOC102552970	0.001	0.007	0.137	0.001	7.74709	7.74709	145.181	1	Z-026774	LOC102552970	gene		D:\assemblies\Rattus_norvegicus-Rnor_6.0-dbSNP149\Rattus_norvegicus-Rnor_6.0-dbSNP149.genometemplate\sequences\NC_005115_chr16.gbk#0	90668790	NC_005115.4	-	2238	82179872..82177635	102552970, 7626046		LOC102552970
Marco	0.001	0.001	79.694	0.001	1	1	84320.8	1	Z-026804	Marco	gene		D:\assemblies\Rattus_norvegicus-Rnor_6.0-dbSNP149\Rattus_norvegicus-Rnor_6.0-dbSNP149.genometemplate\sequences\NC_005115_chr16.gbk#0	90668790	NC_005115.4	-	32485	85147683..85115199	367391, 1589662		Marco
LOC108353116	0.001	0.012	0.255	0.001	12.4894	12.4894	269.969	1	Z-026859	LOC108353116	gene		D:\assemblies\Rattus_norvegicus-Rnor_6.0-dbSNP149\Rattus_norvegicus-Rnor_6.0-dbSNP149.genometemplate\sequences\NC_005116_chr17.gbk#0	90843779	NC_005116.4	-	978	3101438..3100461	108353116		LOC108353116
Testin	0.006	0.001	0.302	0.001	0.14647	1	319.7	6.82733	Z-026876	Testin	gene		D:\assemblies\Rattus_norvegicus-Rnor_6.0-dbSNP149\Rattus_norvegicus-Rnor_6.0-dbSNP149.genometemplate\sequences\NC_005116_chr17.gbk#0	90843779	NC_005116.4	+	30581	4194796..4225376	286916, 708447		Testin
LOC102548532	0.005	0.001	0.127	0.001	0.17532	1	134.37	5.70385	Z-026904	LOC102548532	gene		D:\assemblies\Rattus_norvegicus-Rnor_6.0-dbSNP149\Rattus_norvegicus-Rnor_6.0-dbSNP149.genometemplate\sequences\NC_005116_chr17.gbk#0	90843779	NC_005116.4	-	3179	5485324..5482146	102548532, 7664121		LOC102548532
LOC102549141	0.05	2.092	0.001	0.806	41.5542	2.59385	0.00117203	0.062421	Z-026913	LOC102549141	gene		D:\assemblies\Rattus_norvegicus-Rnor_6.0-dbSNP149\Rattus_norvegicus-Rnor_6.0-dbSNP149.genometemplate\sequences\NC_005116_chr17.gbk#0	90843779	NC_005116.4	-	1553	6560324..6558772	102549141, 7714505		LOC102549141
LOC102550726	0.045	0.851	0.001	0.659	18.7897	1.29162	0.00143374	0.068741	Z-026914	LOC102550726	gene		D:\assemblies\Rattus_norvegicus-Rnor_6.0-dbSNP149\Rattus_norvegicus-Rnor_6.0-dbSNP149.genometemplate\sequences\NC_005116_chr17.gbk#0	90843779	NC_005116.4	-	2784	6569163..6566380	102550726, 7720001		LOC102550726
LOC108348498	0.001	0.046	0.001	0.101	49.0182	0.458177	0.00934707	0.00934707	Z-026936	LOC108348498	gene		D:\assemblies\Rattus_norvegicus-Rnor_6.0-dbSNP149\Rattus_norvegicus-Rnor_6.0-dbSNP149.genometemplate\sequences\NC_005116_chr17.gbk#0	90843779	NC_005116.4	+	49997	8000413..8050409	108348498		LOC108348498
LOC103690142	1.09	2.102	13.886	0.864	1.92846	2.43359	16.0801	1.26193	Z-026954	LOC103690142	gene		D:\assemblies\Rattus_norvegicus-Rnor_6.0-dbSNP149\Rattus_norvegicus-Rnor_6.0-dbSNP149.genometemplate\sequences\NC_005116_chr17.gbk#0	90843779	NC_005116.4	-	3209	8985792..8982584	103690142, 9357931		LOC103690142
LOC100910720	0.001	0.001	0.694	0.001	1	1	734.278	1	Z-026964	LOC100910720	gene		D:\assemblies\Rattus_norvegicus-Rnor_6.0-dbSNP149\Rattus_norvegicus-Rnor_6.0-dbSNP149.genometemplate\sequences\NC_005116_chr17.gbk#0	90843779	NC_005116.4	+	2928	9368466..9371393	100910720, 6497023		LOC100910720
Rab24	7.514	22.962	130.225	12.827	3.05597	1.7901	10.152	0.58577	Z-026991	Rab24	gene		D:\assemblies\Rattus_norvegicus-Rnor_6.0-dbSNP149\Rattus_norvegicus-Rnor_6.0-dbSNP149.genometemplate\sequences\NC_005116_chr17.gbk#0	90843779	NC_005116.4	+	2206	9837259..9839464	361208, 1309112		Rab24
Fgfr4	0.006	0.042	0.152	0.001	7.39785	44.0149	160.579	5.94969	Z-026994	Fgfr4	gene		D:\assemblies\Rattus_norvegicus-Rnor_6.0-dbSNP149\Rattus_norvegicus-Rnor_6.0-dbSNP149.genometemplate\sequences\NC_005116_chr17.gbk#0	90843779	NC_005116.4	-	14268	10004339..9990072	25114, 2612		Fgfr4
LOC103694041	0.008	0.035	3.633	0.001	4.41934	37.3931	3844.26	8.46124	Z-027042	LOC103694041	gene		D:\assemblies\Rattus_norvegicus-Rnor_6.0-dbSNP149\Rattus_norvegicus-Rnor_6.0-dbSNP149.genometemplate\sequences\NC_005116_chr17.gbk#0	90843779	NC_005116.4	+	3258	12732705..12735962	103694041, 9299224		LOC103694041
Cap2	0.007	0.041	0.192	0.001	6.09509	43.0824	202.962	7.06838	Z-027145	Cap2	gene		D:\assemblies\Rattus_norvegicus-Rnor_6.0-dbSNP149\Rattus_norvegicus-Rnor_6.0-dbSNP149.genometemplate\sequences\NC_005116_chr17.gbk#0	90843779	NC_005116.4	-	151253	18592866..18441614	116653, 620310		Cap2
LOC102550923	0.001	0.001	0.047	0.001	1	1	49.8604	1	Z-027170	LOC102550923	gene		D:\assemblies\Rattus_norvegicus-Rnor_6.0-dbSNP149\Rattus_norvegicus-Rnor_6.0-dbSNP149.genometemplate\sequences\NC_005116_chr17.gbk#0	90843779	NC_005116.4	-	19990	21049142..21029153	102550923, 7496434		LOC102550923
LOC108348545	0.004	0.041	0.001	0.152	10.4548	0.267667	0.00621838	0.0256022	Z-027196	LOC108348545	gene		D:\assemblies\Rattus_norvegicus-Rnor_6.0-dbSNP149\Rattus_norvegicus-Rnor_6.0-dbSNP149.genometemplate\sequences\NC_005116_chr17.gbk#0	90843779	NC_005116.4	+	32025	22406357..22438381	108348545		LOC108348545
Adtrp	0.008	0.007	0.974	0.001	0.907763	7.71344	1030.62	8.49719	Z-027197	Adtrp	gene		D:\assemblies\Rattus_norvegicus-Rnor_6.0-dbSNP149\Rattus_norvegicus-Rnor_6.0-dbSNP149.genometemplate\sequences\NC_005116_chr17.gbk#0	90843779	NC_005116.4	+	68384	22619913..22688296	361228, 1305679		Adtrp	Aa2-020, RGD1305679
Fam217a	0.038	0.007	0.147	0.001	0.190756	7.57203	155.871	39.6948	Z-027265	Fam217a	gene		D:\assemblies\Rattus_norvegicus-Rnor_6.0-dbSNP149\Rattus_norvegicus-Rnor_6.0-dbSNP149.genometemplate\sequences\NC_005116_chr17.gbk#0	90843779	NC_005116.4	+	6430	30670137..30676566	498735, 1566214		Fam217a
LOC102551220	0.001	0.008	0.341	0.001	8.04473	8.04473	360.945	1	Z-027273	LOC102551220	gene		D:\assemblies\Rattus_norvegicus-Rnor_6.0-dbSNP149\Rattus_norvegicus-Rnor_6.0-dbSNP149.genometemplate\sequences\NC_005116_chr17.gbk#0	90843779	NC_005116.4	-	1980	31441427..31439448	102551220, 7560629		LOC102551220
LOC108349284	0.001	0.001	0.289	0.001	1	1	305.835	1	Z-027281	LOC108349284	gene		D:\assemblies\Rattus_norvegicus-Rnor_6.0-dbSNP149\Rattus_norvegicus-Rnor_6.0-dbSNP149.genometemplate\sequences\NC_005116_chr17.gbk#0	90843779	NC_005116.4	-	1006	31895002..31893997	108349284		LOC108349284
LOC108348555	0.001	0.007	0.001	0.157	7.37681	0.0444077	0.00601991	0.00601991	Z-027307	LOC108348555	gene		D:\assemblies\Rattus_norvegicus-Rnor_6.0-dbSNP149\Rattus_norvegicus-Rnor_6.0-dbSNP149.genometemplate\sequences\NC_005116_chr17.gbk#0	90843779	NC_005116.4	+	4129	33081752..33085880	108348555		LOC108348555
LOC103690165	0.001	0.008	0.063	0.001	8.31105	8.31105	66.8204	1	Z-027315	LOC103690165	gene		D:\assemblies\Rattus_norvegicus-Rnor_6.0-dbSNP149\Rattus_norvegicus-Rnor_6.0-dbSNP149.genometemplate\sequences\NC_005116_chr17.gbk#0	90843779	NC_005116.4	+	3607	34691084..34694690	103690165, 9295713		LOC103690165
Hus1b	0.001	0.008	0.063	0.001	8.31105	8.31105	66.8204	1	Z-027322	Hus1b	gene		D:\assemblies\Rattus_norvegicus-Rnor_6.0-dbSNP149\Rattus_norvegicus-Rnor_6.0-dbSNP149.genometemplate\sequences\NC_005116_chr17.gbk#0	90843779	NC_005116.4	+	831	35424018..35424848	691382, 1585035		Hus1b
Cmah	0.52	0.178	18.785	0.52	0.34137	0.341869	36.1497	1.00146	Z-027385	Cmah	gene		D:\assemblies\Rattus_norvegicus-Rnor_6.0-dbSNP149\Rattus_norvegicus-Rnor_6.0-dbSNP149.genometemplate\sequences\NC_005116_chr17.gbk#0	90843779	NC_005116.4	-	72750	42640221..42567472	361245, 1311930		Cmah	Cmahp
Hist1h2af	0.083	0.01	3.213	0.001	0.125374	10.9575	3399.46	87.398	Z-027407	Hist1h2af	gene		D:\assemblies\Rattus_norvegicus-Rnor_6.0-dbSNP149\Rattus_norvegicus-Rnor_6.0-dbSNP149.genometemplate\sequences\NC_005116_chr17.gbk#0	90843779	NC_005116.4	-	393	43627629..43627237	498753, 1564767		Hist1h2af	RGD1564767
LOC684797	0.001	0.001	1.05	0.001	1	1	1110.9	1	Z-027419	LOC684797	gene		D:\assemblies\Rattus_norvegicus-Rnor_6.0-dbSNP149\Rattus_norvegicus-Rnor_6.0-dbSNP149.genometemplate\sequences\NC_005116_chr17.gbk#0	90843779	NC_005116.4	-	510	43778990..43778481	684797, 1586699		LOC684797
Hist1h2bf	0.001	0.001	1.825	0.001	1	1	1930.83	1	Z-027451	Hist1h2bf	gene		D:\assemblies\Rattus_norvegicus-Rnor_6.0-dbSNP149\Rattus_norvegicus-Rnor_6.0-dbSNP149.genometemplate\sequences\NC_005116_chr17.gbk#0	90843779	NC_005116.4	+	466	44748445..44748910	306969, 1308088		Hist1h2bf
Hist1h1b	0.001	0.106	2.315	0.001	112.417	112.417	2449.54	1	Z-027455	Hist1h1b	gene		D:\assemblies\Rattus_norvegicus-Rnor_6.0-dbSNP149\Rattus_norvegicus-Rnor_6.0-dbSNP149.genometemplate\sequences\NC_005116_chr17.gbk#0	90843779	NC_005116.4	+	669	44766313..44766981	680522, 1590638		Hist1h1b
Hist1h2ak	0.005	0.001	3.148	0.001	0.177009	1	3331.08	5.64944	Z-027460	Hist1h2ak	gene		D:\assemblies\Rattus_norvegicus-Rnor_6.0-dbSNP149\Rattus_norvegicus-Rnor_6.0-dbSNP149.genometemplate\sequences\NC_005116_chr17.gbk#0	90843779	NC_005116.4	-	393	44841382..44840990	680615, 1589461		Hist1h2ak
Nme8	0.001	0.001	0.825	0.001	1	1	872.637	1	Z-027488	Nme8	gene		D:\assemblies\Rattus_norvegicus-Rnor_6.0-dbSNP149\Rattus_norvegicus-Rnor_6.0-dbSNP149.genometemplate\sequences\NC_005116_chr17.gbk#0	90843779	NC_005116.4	+	67612	47300932..47368543	364729, 735069		Nme8	Sptrx2, Txndc3
Epdr1	1.763	3.45	0.001	2.005	1.95681	1.72052	0.000471271	0.879246	Z-027490	Epdr1	gene		D:\assemblies\Rattus_norvegicus-Rnor_6.0-dbSNP149\Rattus_norvegicus-Rnor_6.0-dbSNP149.genometemplate\sequences\NC_005116_chr17.gbk#0	90843779	NC_005116.4	+	24626	47397558..47422183	291180, 1359161		Epdr1	Epdr2, MERP2
LOC681290	0.015	0.001	1.093	0.001	0.0627846	1	1156.3	15.9275	Z-027493	LOC681290	gene		D:\assemblies\Rattus_norvegicus-Rnor_6.0-dbSNP149\Rattus_norvegicus-Rnor_6.0-dbSNP149.genometemplate\sequences\NC_005116_chr17.gbk#0	90843779	NC_005116.4	-	2367	47703634..47701268	681290, 7503535		LOC681290
LOC108348620	0.005	0.054	0.001	0.074	11.7804	0.733113	0.0127137	0.0622318	Z-027510	LOC108348620	gene		D:\assemblies\Rattus_norvegicus-Rnor_6.0-dbSNP149\Rattus_norvegicus-Rnor_6.0-dbSNP149.genometemplate\sequences\NC_005116_chr17.gbk#0	90843779	NC_005116.4	-	9484	50954770..50945287	108348620		LOC108348620
LOC108348613	0.011	0.061	0.527	0.001	5.50155	64.6551	557.394	11.7522	Z-027601	LOC108348613	gene		D:\assemblies\Rattus_norvegicus-Rnor_6.0-dbSNP149\Rattus_norvegicus-Rnor_6.0-dbSNP149.genometemplate\sequences\NC_005116_chr17.gbk#0	90843779	NC_005116.4	-	7403	65133168..65125766	108348613		LOC108348613
Akr1c14	21.918	49.664	0.604	38.573	2.26595	1.28754	0.0156549	0.568212	Z-027633	Akr1c14	gene		D:\assemblies\Rattus_norvegicus-Rnor_6.0-dbSNP149\Rattus_norvegicus-Rnor_6.0-dbSNP149.genometemplate\sequences\NC_005116_chr17.gbk#0	90843779	NC_005116.4	-	21031	69827125..69806095	191574, 708361		Akr1c14	Akr1c9
Net1	121.104	209.167	3.169	150.13	1.72717	1.39324	0.0211066	0.806658	Z-027638	Net1	gene		D:\assemblies\Rattus_norvegicus-Rnor_6.0-dbSNP149\Rattus_norvegicus-Rnor_6.0-dbSNP149.genometemplate\sequences\NC_005116_chr17.gbk#0	90843779	NC_005116.4	+	29192	69991786..70020977	307098, 1305034		Net1
Calml5	0.001	0.001	3.967	0.001	1	1	4197.18	1	Z-027640	Calml5	gene		D:\assemblies\Rattus_norvegicus-Rnor_6.0-dbSNP149\Rattus_norvegicus-Rnor_6.0-dbSNP149.genometemplate\sequences\NC_005116_chr17.gbk#0	90843779	NC_005116.4	-	931	70045886..70044956	364774, 1310047		Calml5
Calml3	3.846	0.675	0.001	4.722	0.175492	0.142938	0.000200157	0.814502	Z-027641	Calml3	gene		D:\assemblies\Rattus_norvegicus-Rnor_6.0-dbSNP149\Rattus_norvegicus-Rnor_6.0-dbSNP149.genometemplate\sequences\NC_005116_chr17.gbk#0	90843779	NC_005116.4	+	3240	70070458..70073697	307100, 1305499		Calml3
LOC108353152	0.001	0.001	0.265	0.001	1	1	280.23	1	Z-027675	LOC108353152	gene		D:\assemblies\Rattus_norvegicus-Rnor_6.0-dbSNP149\Rattus_norvegicus-Rnor_6.0-dbSNP149.genometemplate\sequences\NC_005116_chr17.gbk#0	90843779	NC_005116.4	+	2895	75535090..75537984	108353152		LOC108353152
Ccdc3	2	1.922	0.001	2.186	0.960985	0.879086	0.000432282	0.914776	Z-027690	Ccdc3	gene		D:\assemblies\Rattus_norvegicus-Rnor_6.0-dbSNP149\Rattus_norvegicus-Rnor_6.0-dbSNP149.genometemplate\sequences\NC_005116_chr17.gbk#0	90843779	NC_005116.4	-	101794	77093515..76991722	498795, 1559473		Ccdc3
Bend7	0.239	0.008	0.001	0.247	0.0337288	0.0327317	0.00383255	0.970438	Z-027697	Bend7	gene		D:\assemblies\Rattus_norvegicus-Rnor_6.0-dbSNP149\Rattus_norvegicus-Rnor_6.0-dbSNP149.genometemplate\sequences\NC_005116_chr17.gbk#0	90843779	NC_005116.4	-	79459	77527888..77448430	361275, 1305898		Bend7	RGD1305898
LOC103694135	0.001	0.017	0.057	0.001	18.2633	18.2633	60.2368	1	Z-027721	LOC103694135	gene		D:\assemblies\Rattus_norvegicus-Rnor_6.0-dbSNP149\Rattus_norvegicus-Rnor_6.0-dbSNP149.genometemplate\sequences\NC_005116_chr17.gbk#0	90843779	NC_005116.4	+	5075	79722995..79728069	103694135, 9187604		LOC103694135
Nebl	0.006	0.179	4.294	0.084	31.8619	2.13923	51.3936	0.0671408	Z-027750	Nebl	gene		D:\assemblies\Rattus_norvegicus-Rnor_6.0-dbSNP149\Rattus_norvegicus-Rnor_6.0-dbSNP149.genometemplate\sequences\NC_005116_chr17.gbk#0	90843779	NC_005116.4	-	106025	84247038..84141014	307189, 1308315		Nebl
Spag6l	0.001	0.001	0.566	0.001	1	1	598.645	1	Z-027763	Spag6l	gene		D:\assemblies\Rattus_norvegicus-Rnor_6.0-dbSNP149\Rattus_norvegicus-Rnor_6.0-dbSNP149.genometemplate\sequences\NC_005116_chr17.gbk#0	90843779	NC_005116.4	+	55663	85382314..85437976	291340, 1305616		Spag6l	Spag6
LOC102554145	0.001	0.005	0.503	0.001	4.87386	4.87386	532.099	1	Z-027764	LOC102554145	gene		D:\assemblies\Rattus_norvegicus-Rnor_6.0-dbSNP149\Rattus_norvegicus-Rnor_6.0-dbSNP149.genometemplate\sequences\NC_005116_chr17.gbk#0	90843779	NC_005116.4	+	6622	85482368..85488989	102554145, 7553956		LOC102554145
Armc3	0.215	0.493	1.592	0.156	2.28734	3.16305	10.2177	1.38285	Z-027768	Armc3	gene		D:\assemblies\Rattus_norvegicus-Rnor_6.0-dbSNP149\Rattus_norvegicus-Rnor_6.0-dbSNP149.genometemplate\sequences\NC_005116_chr17.gbk#0	90843779	NC_005116.4	+	113563	85895841..86009403	100361506, 2319961		Armc3
LOC103694144	0.001	0.001	0.561	0.001	1	1	593.221	1	Z-027782	LOC103694144	gene		D:\assemblies\Rattus_norvegicus-Rnor_6.0-dbSNP149\Rattus_norvegicus-Rnor_6.0-dbSNP149.genometemplate\sequences\NC_005116_chr17.gbk#0	90843779	NC_005116.4	+	1002	86880805..86881806	103694144, 9327273		LOC103694144
LOC103694149	0.001	0.004	0.275	0.001	4.51649	4.51649	290.637	1	Z-027819	LOC103694149	gene		D:\assemblies\Rattus_norvegicus-Rnor_6.0-dbSNP149\Rattus_norvegicus-Rnor_6.0-dbSNP149.genometemplate\sequences\NC_005116_chr17.gbk#0	90843779	NC_005116.4	+	2994	90756166..90759159	103694149, 9070703		LOC103694149
Rpl36al	103.61	291.18	1245.35	143.127	2.81034	2.03441	8.70102	0.723904	Z-027836	Rpl36al	gene		D:\assemblies\Rattus_norvegicus-Rnor_6.0-dbSNP149\Rattus_norvegicus-Rnor_6.0-dbSNP149.genometemplate\sequences\NC_005117_chr18.gbk#0	88201929	NC_005117.4	+	1404	1504178..1505581	81769, 621156		Rpl36al
LOC100909782	0.001	0.001	0.202	0.001	1	1	213.26	1	Z-027851	LOC100909782	gene		D:\assemblies\Rattus_norvegicus-Rnor_6.0-dbSNP149\Rattus_norvegicus-Rnor_6.0-dbSNP149.genometemplate\sequences\NC_005117_chr18.gbk#0	88201929	NC_005117.4	-	11112	2364858..2353747	100909782, 6501875		LOC100909782
LOC100909810	0.001	0.001	0.202	0.001	1	1	213.26	1	Z-027853	LOC100909810	gene		D:\assemblies\Rattus_norvegicus-Rnor_6.0-dbSNP149\Rattus_norvegicus-Rnor_6.0-dbSNP149.genometemplate\sequences\NC_005117_chr18.gbk#0	88201929	NC_005117.4	-	11112	2413765..2402654	100909810, 6501622		LOC100909810
Dsc3	0.001	0.001	0.196	0.001	1	1	207.06	1	Z-027903	Dsc3	gene		D:\assemblies\Rattus_norvegicus-Rnor_6.0-dbSNP149\Rattus_norvegicus-Rnor_6.0-dbSNP149.genometemplate\sequences\NC_005117_chr18.gbk#0	88201929	NC_005117.4	-	36800	11789846..11753047	307563, 1311782		Dsc3
Dsc2	0.001	0.001	0.221	0.001	1	1	233.82	1	Z-027904	Dsc2	gene		D:\assemblies\Rattus_norvegicus-Rnor_6.0-dbSNP149\Rattus_norvegicus-Rnor_6.0-dbSNP149.genometemplate\sequences\NC_005117_chr18.gbk#0	88201929	NC_005117.4	-	32097	11858801..11826705	291760, 1309426		Dsc2
Dsg1	0.001	0.001	0.067	0.001	1	1	71.3265	1	Z-027906	Dsg1	gene		D:\assemblies\Rattus_norvegicus-Rnor_6.0-dbSNP149\Rattus_norvegicus-Rnor_6.0-dbSNP149.genometemplate\sequences\NC_005117_chr18.gbk#0	88201929	NC_005117.4	+	32037	12008301..12040337	291755, 1309925		Dsg1
Garem1	0.301	0.061	0.106	0.001	0.20207	64.3257	112.143	318.334	Z-027921	Garem1	gene		D:\assemblies\Rattus_norvegicus-Rnor_6.0-dbSNP149\Rattus_norvegicus-Rnor_6.0-dbSNP149.genometemplate\sequences\NC_005117_chr18.gbk#0	88201929	NC_005117.4	+	24642	14982604..15007245	679154, 1591842		Garem1
LOC102551486	0.696	0.191	0.001	0.714	0.274677	0.267516	0.00132334	0.973927	Z-027927	LOC102551486	gene		D:\assemblies\Rattus_norvegicus-Rnor_6.0-dbSNP149\Rattus_norvegicus-Rnor_6.0-dbSNP149.genometemplate\sequences\NC_005117_chr18.gbk#0	88201929	NC_005117.4	-	3776	15461415..15457640	102551486, 7733249		LOC102551486
LOC102551809	0.007	0.112	0.001	0.455	15.8914	0.24707	0.00207618	0.0155474	Z-027931	LOC102551809	gene		D:\assemblies\Rattus_norvegicus-Rnor_6.0-dbSNP149\Rattus_norvegicus-Rnor_6.0-dbSNP149.genometemplate\sequences\NC_005117_chr18.gbk#0	88201929	NC_005117.4	-	3419	15558435..15555017	102551809, 7670702		LOC102551809
Dsg2	0.005	0.005	0.414	0.001	1.00694	5.34444	437.529	5.30759	Z-027932	Dsg2	gene		D:\assemblies\Rattus_norvegicus-Rnor_6.0-dbSNP149\Rattus_norvegicus-Rnor_6.0-dbSNP149.genometemplate\sequences\NC_005117_chr18.gbk#0	88201929	NC_005117.4	-	58399	15637720..15579322	307562, 1311143		Dsg2
LOC108348764	0.001	0.056	0.512	0.001	59.5845	59.5845	541.673	1	Z-027996	LOC108348764	gene		D:\assemblies\Rattus_norvegicus-Rnor_6.0-dbSNP149\Rattus_norvegicus-Rnor_6.0-dbSNP149.genometemplate\sequences\NC_005117_chr18.gbk#0	88201929	NC_005117.4	-	2854	25143802..25140949	108348764		LOC108348764
Nme5	0.001	0.006	0.001	0.2	6.29985	0.0297268	0.00471866	0.00471866	Z-028017	Nme5	gene		D:\assemblies\Rattus_norvegicus-Rnor_6.0-dbSNP149\Rattus_norvegicus-Rnor_6.0-dbSNP149.genometemplate\sequences\NC_005117_chr18.gbk#0	88201929	NC_005117.4	-	17182	27374641..27357460	688903, 1583004		Nme5
LOC102550732	0.075	0.119	0.001	0.503	1.58205	0.236446	0.0018781	0.149456	Z-028030	LOC102550732	gene		D:\assemblies\Rattus_norvegicus-Rnor_6.0-dbSNP149\Rattus_norvegicus-Rnor_6.0-dbSNP149.genometemplate\sequences\NC_005117_chr18.gbk#0	88201929	NC_005117.4	+	2833	27677606..27680438	102550732, 7615034		LOC102550732
Dnd1	0.001	0.011	0.079	0.001	11.4512	11.4512	83.234	1	Z-028078	Dnd1	gene		D:\assemblies\Rattus_norvegicus-Rnor_6.0-dbSNP149\Rattus_norvegicus-Rnor_6.0-dbSNP149.genometemplate\sequences\NC_005117_chr18.gbk#0	88201929	NC_005117.4	-	2625	29611212..29608588	679841, 1583648		Dnd1
Pcdhb22	0.001	0.007	0.055	0.001	7.56552	7.56552	58.5934	1	Z-028107	Pcdhb22	gene		D:\assemblies\Rattus_norvegicus-Rnor_6.0-dbSNP149\Rattus_norvegicus-Rnor_6.0-dbSNP149.genometemplate\sequences\NC_005117_chr18.gbk#0	88201929	NC_005117.4	+	4593	30590864..30595456	307486, 1310328		Pcdhb22
Pcdh1	0.001	0.005	0.196	0.001	5.80508	5.80508	207.254	1	Z-028138	Pcdh1	gene		D:\assemblies\Rattus_norvegicus-Rnor_6.0-dbSNP149\Rattus_norvegicus-Rnor_6.0-dbSNP149.genometemplate\sequences\NC_005117_chr18.gbk#0	88201929	NC_005117.4	-	13067	31343147..31330081	307481, 1308490		Pcdh1
Myot	0.004	0.001	0.001	0.058	0.214171	0.0162825	0.0162825	0.0760255	Z-028165	Myot	gene		D:\assemblies\Rattus_norvegicus-Rnor_6.0-dbSNP149\Rattus_norvegicus-Rnor_6.0-dbSNP149.genometemplate\sequences\NC_005117_chr18.gbk#0	88201929	NC_005117.4	+	19564	35573978..35593541	291605, 1310569		Myot	Ttid
Plac8l1	0.001	0.01	0.357	0.001	10.6569	10.6569	377.905	1	Z-028171	Plac8l1	gene		D:\assemblies\Rattus_norvegicus-Rnor_6.0-dbSNP149\Rattus_norvegicus-Rnor_6.0-dbSNP149.genometemplate\sequences\NC_005117_chr18.gbk#0	88201929	NC_005117.4	-	20537	36513493..36492957	364853, 1588513		Plac8l1
LOC102554034	0.001	0.035	0.001	0.142	36.7275	0.243771	0.00663729	0.00663729	Z-028194	LOC102554034	gene		D:\assemblies\Rattus_norvegicus-Rnor_6.0-dbSNP149\Rattus_norvegicus-Rnor_6.0-dbSNP149.genometemplate\sequences\NC_005117_chr18.gbk#0	88201929	NC_005117.4	+	9146	38847556..38856701	102554034, 7532326		LOC102554034
LOC108353170	0.001	0.007	0.335	0.001	6.90681	6.90681	354.061	1	Z-028233	LOC108353170	gene		D:\assemblies\Rattus_norvegicus-Rnor_6.0-dbSNP149\Rattus_norvegicus-Rnor_6.0-dbSNP149.genometemplate\sequences\NC_005117_chr18.gbk#0	88201929	NC_005117.4	-	1207	45977114..45975908	108353170		LOC108353170
LOC102546473	0.266	0.907	0.001	0.344	3.41691	2.63977	0.00274933	0.77256	Z-028262	LOC102546473	gene		D:\assemblies\Rattus_norvegicus-Rnor_6.0-dbSNP149\Rattus_norvegicus-Rnor_6.0-dbSNP149.genometemplate\sequences\NC_005117_chr18.gbk#0	88201929	NC_005117.4	+	39765	50315050..50354814	102546473, 7553718		LOC102546473
LOC103694226	0.004	0.001	0.247	0.001	0.234881	1	261.735	4.25747	Z-028299	LOC103694226	gene		D:\assemblies\Rattus_norvegicus-Rnor_6.0-dbSNP149\Rattus_norvegicus-Rnor_6.0-dbSNP149.genometemplate\sequences\NC_005117_chr18.gbk#0	88201929	NC_005117.4	+	1456	55466358..55467813	103694226, 9112732		LOC103694226
LOC102555392	0.004	0.001	0.247	0.001	0.234881	1	261.735	4.25747	Z-028302	LOC102555392	gene		D:\assemblies\Rattus_norvegicus-Rnor_6.0-dbSNP149\Rattus_norvegicus-Rnor_6.0-dbSNP149.genometemplate\sequences\NC_005117_chr18.gbk#0	88201929	NC_005117.4	+	1456	55530849..55532304	102555392, 7620426		LOC102555392
Synpo	14.269	11.582	0.592	19.351	0.811731	0.598541	0.0305766	0.737364	Z-028311	Synpo	gene		D:\assemblies\Rattus_norvegicus-Rnor_6.0-dbSNP149\Rattus_norvegicus-Rnor_6.0-dbSNP149.genometemplate\sequences\NC_005117_chr18.gbk#0	88201929	NC_005117.4	-	58332	55921412..55863081	60324, 620668		Synpo
Arhgef37	0.368	0.792	0.001	0.763	2.1502	1.03814	0.00123874	0.482811	Z-028334	Arhgef37	gene		D:\assemblies\Rattus_norvegicus-Rnor_6.0-dbSNP149\Rattus_norvegicus-Rnor_6.0-dbSNP149.genometemplate\sequences\NC_005117_chr18.gbk#0	88201929	NC_005117.4	-	53174	56871159..56817986	307398, 1560471		Arhgef37	RGD1560471
Il17b	0.042	0.001	0.617	0.001	0.02272	1	652.429	44.0142	Z-028339	Il17b	gene		D:\assemblies\Rattus_norvegicus-Rnor_6.0-dbSNP149\Rattus_norvegicus-Rnor_6.0-dbSNP149.genometemplate\sequences\NC_005117_chr18.gbk#0	88201929	NC_005117.4	+	4435	57011575..57016009	116472, 620614		Il17b
Fech	33.123	60.463	0.873	39.314	1.8254	1.53794	0.0222033	0.842526	Z-028365	Fech	gene		D:\assemblies\Rattus_norvegicus-Rnor_6.0-dbSNP149\Rattus_norvegicus-Rnor_6.0-dbSNP149.genometemplate\sequences\NC_005117_chr18.gbk#0	88201929	NC_005117.4	-	33201	59975192..59941992	361338, 1307556		Fech
LOC102553500	0.321	1.329	0.001	0.519	4.14177	2.5629	0.0018228	0.618794	Z-028368	LOC102553500	gene		D:\assemblies\Rattus_norvegicus-Rnor_6.0-dbSNP149\Rattus_norvegicus-Rnor_6.0-dbSNP149.genometemplate\sequences\NC_005117_chr18.gbk#0	88201929	NC_005117.4	+	4686	60151769..60156454	102553500, 7536071		LOC102553500
Rab27b	8.041	12.887	0.001	8.729	1.60259	1.47632	0.000108275	0.921208	Z-028432	Rab27b	gene		D:\assemblies\Rattus_norvegicus-Rnor_6.0-dbSNP149\Rattus_norvegicus-Rnor_6.0-dbSNP149.genometemplate\sequences\NC_005117_chr18.gbk#0	88201929	NC_005117.4	-	158590	68644595..68486006	84590, 620114		Rab27b
LOC102548285	0.694	1.97	0.001	1.27	2.84012	1.55152	0.000744317	0.546286	Z-028434	LOC102548285	gene		D:\assemblies\Rattus_norvegicus-Rnor_6.0-dbSNP149\Rattus_norvegicus-Rnor_6.0-dbSNP149.genometemplate\sequences\NC_005117_chr18.gbk#0	88201929	NC_005117.4	+	4313	68689517..68693829	102548285, 7516836		LOC102548285
[truncated: 131 more rows]
